# Supplementary material for: Global, regional, and national age-sex-specific mortality and life expectancy, 1950–2017: a systematic analysis for the Global Burden of Disease Study 2017
Source: PubMed Central journal article supplement (PMC6227504; doi:10.1016/s0140-6736(18)31891-9), 2018-11-10
Supplement: mmc1.pdf [file mmc1.pdf]

# THE LANCET

## Supplementary appendix 1

This appendix formed part of the original submission and has been peer reviewed. We post it as supplied by the authors.

Supplement to: GBD 2017 Mortality Collaborators. Global, regional, and national age-sex-specific mortality and life expectancy, 1950–2017: a systematic analysis for the Global Burden of Disease Study 2017. *Lancet* 2018; **392**: 1684–735.

## Methods appendix to “Global, regional, and national under-5 mortality, adult mortality, age-specific mortality, and life expectancy, 1950-2017: a systematic analysis for the Global Burden of Disease Study 2017”

This appendix provides further methodological detail, supplemental figures, and more detailed results for “Global, regional, and national under-5 mortality, adult mortality, age-specific mortality, and life expectancy, 1950-2017: a systematic analysis for the Global Burden of Disease Study 2017.” This appendix is organized into sections that follow the structure of the main paper.

## Preamble

This appendix provides further methodological detail and more detailed results for “Global, regional, and national under-5 mortality, adult mortality, age-specific mortality, and life expectancy, 1950-2017: a systematic analysis for the Global Burden of Disease Study 2017.” This study complies with the Guidelines for Accurate and Transparent Health Estimates Reporting (GATHER) recommendations. It includes detailed tables and information on data in an effort to maximize transparency in our estimation processes and provide a comprehensive description of analytical steps. We intend this appendix to be a living document, to be updated with each iteration of the Global Burden of Disease Study.

## Table of Contents

|                                                                                                   |    |
|---------------------------------------------------------------------------------------------------|----|
| List of Appendix Figures and Tables.....                                                          | 4  |
| Authors' Contributions.....                                                                       | i  |
| Section 1: GBD Overview .....                                                                     | 5  |
| Section 1.1: Geographic Locations of the Analysis .....                                           | 5  |
| Section 1.2: Time Period of the Analysis.....                                                     | 5  |
| Section 1.3: Statement of GATHER Compliance .....                                                 | 5  |
| Section 1.4: List of abbreviations.....                                                           | 6  |
| Section 1.5: GBD results overview .....                                                           | 8  |
| Section 1.6: Data input sources overview.....                                                     | 9  |
| Section 1.7: Funding Sources .....                                                                | 9  |
| Section 2: GBD 2017 All-Cause Mortality and HIV Estimation Process .....                          | 9  |
| Section 2.1: Overview .....                                                                       | 9  |
| Section 2.2: Child mortality.....                                                                 | 10 |
| Section 2.3: Adult mortality .....                                                                | 25 |
| Section 2.4: Model life table system.....                                                         | 40 |
| Section 2.5: HIV/AIDS estimation .....                                                            | 50 |
| Section 2.6: Age-specific mortality estimation for all GBD age-groups: with and without HIV ..... | 54 |
| Section 3: SDI analysis.....                                                                      | 55 |
| Section 3.1: SDI definition.....                                                                  | 55 |
| Section 3.2: Development of revised SDI indicator .....                                           | 55 |
| Section 4: Fatal Discontinuities Estimation.....                                                  | 57 |
| Section 4.1: Input data.....                                                                      | 57 |
| Section 4.2: Modeling strategy .....                                                              | 61 |
| Section 5: Additional Methods Information .....                                                   | 62 |
| Section 5.1: GBD world population age standard.....                                               | 62 |
| Section 5.2: Estimating correlation.....                                                          | 63 |
| Section 5.3: Calculating annualised rates of change.....                                          | 63 |
| Section 5.4: Gross domestic product (GDP) and lagged dependent income (LDI) .....                 | 63 |
| Section 5.5: Calculation of educational attainment covariate .....                                | 64 |
| Section 6: References.....                                                                        | 65 |

## List of Appendix Figures and Tables

### Appendix Figures:

|                                                                                                                                                                      |    |
|----------------------------------------------------------------------------------------------------------------------------------------------------------------------|----|
| Appendix Figure 1. Analytical flowchart for the estimation of all-cause mortality by age and sex and HIV/AIDS incidence, prevalence, and mortality for GBD 2017..... | 69 |
| Appendix Figure 2. Estimated completeness of death registration 1950–2017.....                                                                                       | 70 |

### Appendix Tables:

|                                                                                                                       |     |
|-----------------------------------------------------------------------------------------------------------------------|-----|
| Appendix Table 1. GATHER checklist .....                                                                              | 71  |
| Appendix Table 2. GBD location hierarchy with levels.....                                                             | 74  |
| Appendix Table 3. Number of all-cause mortality data sources by type and location, 1950–2017.....                     | 88  |
| Appendix Table 4. Number of all-cause mortality data sources by type and year, 1950-2017.....                         | 100 |
| Appendix Table 5. Under-5 mortality reference sources by source date and location, 1950-2017.....                     | 102 |
| Appendix Table 6. Distribution of empirical life tables by decade and GBD super-region, 1950-2017....                 | 175 |
| Appendix Table 7. Locations by HIV estimation group.....                                                              | 176 |
| Appendix Table 8. Socio-demographic Index groupings by geography, based on 2017 values.....                           | 178 |
| Appendix Table 9. Socio-demographic Index values for all estimated GBD 2017 locations, 1950-1969.....                 | 192 |
| Appendix Table 10. Socio-demographic Index values for all estimated GBD 2017 locations, 1970–1989.....                | 202 |
| Appendix Table 11. Socio-demographic Index values for all estimated GBD 2017 locations, 1990-2017.....                | 211 |
| Appendix Table 12. GBD World population age standard.....                                                             | 216 |
| Appendix Table 13. New data sources added for GBD 2017 mortality estimation.....                                      | 217 |
| Appendix Table 14. Number of outliered data points for the Age/Sex model by location, source type, and age group..... | 220 |

## Authors' Contributions

### Managing the estimation process

Ashkan Afshin, Aaron Cohen, Elizabeth Cromwell, Lalit Dandona, Rakhi Dandona, Louisa Degenhardt, Samath Dharmaratne, Daniel Dicker, Charbel El Bcheraoui, Kara Estep, Valery Feigin, Nancy Fullman, Emmanuela Gakidou, Simon Hay, Spencer James, Nicholas Kassebaum, Ibrahim Khalil, Heidi Larson, Stephen Lim, Alan Lopez, Rafael Lozano, Felix Masiye, Awoke Misganaw, Ali Mokdad, Erin Mullany, Christopher Murray, Mohsen Naghavi, Elaine Nsoesie, David Pigott, Robert Reiner, Joseph Salama, Katya Shackelford, Caitlyn Steiner, Stein Emil Vollset, Theo Vos, and Harvey Whiteford

### Writing the first draft of the manuscript

Megha Arora, Emmanuela Gakidou, Yihua He, Jun Y Kim, Emilie R Maddison, Erin C Mullany, Katya A Shackelford, Leo G Stewart, and Dillon O Sylte.

### Providing data or critical feedback on data sources

Kalkidan Hassen Abate, Aberash Abay, Solomon Mequanente Abay, Cristiana Abbafati, Ibrahim Abdollahpour, Zegeye Abebe, Yihalem Abebe Belay, Victor Aboyans, Aklilu Abrham Roba, Laith Abu-Raddad, Niveen Abu-Rmeileh, Manfred Accrombessi, Oladimeji Adebayo, Isaac Adedeji, Rufus A. Adedoyin, Olatunji Adetokunboh, Tara Ballav Adhikari, Mina Adib, Kouablan Arsene Adou, José C. Adsuar, Mohsen Afarideh, Rakesh Aggarwal, Sargis Aghayan, Alireza Ahmadi, Mehdi Ahmadi, Mohamed Lemine Cheikh Brahim Ahmed, Muktar Ahmed, Miloud Taki Eddine Aichour, Ali Shafqat Akanda, Mohammedsmaeil Akbari, Tomi Akinyemiju, Nadia Akseer, Fares Alahdab, Khurshid Alam, Kefyalew Addis Alene, Raghieb Ali, Syed Mohamed Aljunid, François Alla, Peter Allebeck, Rajaa Al-Raddadi, Ubai Alsharif, Nelson Alvis-Guzman, Sintayehu Ambachew, Erfan Amini, Walid Ammar, Yaw Ampem Amoako, Catalina Liliana Andrei, Degefaye Anlay, Hossein Ansari, Ansariadi Ansariadi, Mustafa Geleto Ansha, Carl Abelardo Antonio, Seth Christopher Yaw Appiah, Olatunde Aremu, Al Artaman, Krishna K Aryal, Hamid Asayesh, Solomon Weldegebreal Asgedom, Reza Assadi, Tesfay Mehari Atey, Seyyed Shamsadin Athari, Suleman Atique, Marcel Ausloos, Ashish Awasthi, Beatriz Paulina Ayala Quintanilla, Henok Tadesse Ayele, Rakesh Ayer, Peter Azzopardi, Alaa Badawi, Kalpana Balakrishnan, Maciej Banach, Amrit Banstola, Aleksandra Barac, Miguel A. Barboza, Lope Barrero, Sanjay Basu, Shahrzad Bazargan-Hejazi, Neeraj Bedi, Ettore Beghi, Bayu Begashaw Bekele, Saba Abraham Belay, Aminu Bello, Isabela Bensenor, Adam Berman, Eduardo Bernabe, Robert Bernstein, Tambe Bertrand Ayuk, Balem Demtsu Betsu, Mircea Beuran, Soumyadeep Bhaumik, Boris Bikbov, Nigus Bililign, Muhammad Shahdaat Bin Sayeed, Sait Montes Birlik, Charles Birungi, Donal Bisanzio, Berrak Bora Başara, Rupert Bourne, Nicola Luigi Bragazzi, Luisa Brant, Alexandra Brazinova, Nicholas Breitborde, Hermann Brenner, Gabrielle Britton, Traolach Brugha, Kristin Burke, Charlton Callender, Ismael Campos-Nonato, Julio Cesar Campuzano, Jorge Cano, Mate Car, Giulia Carreras, Juan J Carrero, Felix Carvalho, Deborah Carvalho Malta, Carlos Castañeda-Orjuela, Franz Castro, Ferrán Catalá-López, Alanur Cavlin, Yazan Chaiah, Hsing-Yi Chang, Jung-Chen Chang, Pankaj Chaturvedi, Wanqing Chen, Peggy Pei-Chia Chiang, Abdulaal Chitheer, Devasahayam Christopher, Sheng-Chia Chung, Flavia Cicuttini, Massimo Cirillo, Rafael Claro, Daniel Collado Mateo, Maria Magdalena Constantin, Cyrus Cooper, Paolo Angelo Cortesi, Monica Cortinovis, Alexandre Costa Pereira, Michael Criqui, Christopher Crowe, John Crump, Alexandra Cucu, Lalit Dandona, Rakhi Dandona, Paul Dargan, Ahmad Daryani, Siddharth Kumar Das, José Das Neves, Tamirat Dasa, Anand Dayama, Barbora De Courten, Fernando De La Hoz, Louisa Degenhardt, Kebede Deribe, Nikolaos Dervenis, Getenet Dessie, Subhojit Dey, Samath Dharmaratne, Meghnath Dhimal, Daniel Dicker, David Teye Doku,

E. Ray Dorsey, Kerrie Doyle, Thomas M Drake, Manisha Dubey, Soheil Ebrahimpour, Anne Elise Eggen, Eyasu Ejeta, Christian Lycke Ellingsen, Iqbal Elyazar, Aman Endries, Benjamin Er, Sergey Ermakov, Babak Eshрати, Sharareh Eskandarieh, Alireza Esteghamati, Sadaf Esteghamati, Mahdi Fakhar, Mahbobeh Faramarzi, Mohammad Fareed, Carla Farinha, Andrea Farioli, Andre Faro, Farshad Farzadfar, Mohammad Hosein Farzaei, Valery Feigin, Fariba Feizy, Joao Feranandes, Seyed-Mohammad Fereshtehnejad, Eduarda Fernandes, Tilayie Feto Gelano, Daniel Fijabi, Irina Filip, Nataliya Foigt, Richard Franklin, Takeshi Fukumoto, Nancy Fullman, João M. Furtado, Neal Futran, Adriana Galan, Gbetoho Gankpe, M.A. Garcia-Gordillo, Tigist Gashaw, Teshome Gebre, Tsegaye Gebrehiwot, Amanuel Tesfay Gebremedhin, Tilayie Gelano, Johanna Geleijnse, Ayele Geleto, Ricard Genova-Maleras, Peter Gething, Kebede Embaye Gezae, Hesam Ghiasvand, Mamata Ghimire, Richard Gillum, Giorgia Giussani, Shifalika Goenka, Srinivas Goli, Hector Gómez-Dantés, Sameer Gopalani, Atsushi Goto, Bárbara Goulart, Ayman Grada, Giuseppe Grosso, Andre Guimaraes, Prakash Gupta, Rahul Gupta, Rajat Das Gupta, Rajeev Gupta, Tanush Gupta, Juanita Haagsma, Nima Hafezi Nejad, Tekleberhan Beyene Hagos, Gessesew Bugssa Hailu, Arya Haj-Mirzaian, Hilda Harb, Josep Maria Haro, Mehedi Hasan, Hadi Hassankhani, Hamid Y. Hassen, Rasmus Havmoeller, Akbar Hedayatizadeh-Omran, Mohamed Hegazy, Behzad Heibati, Delia Hendrie, Claudiu Herteliu, Fatemeh Heydarpour, Pouria Heydarpour, Sousan Heydarpour, Long Hoang Nguyen, Hans Hoek, Michael Hole, Enayatollah Homaie Rad, Praveen Hoogar, H Dean Hosgood, Mehdi Hosseinzadeh, Mihaela Hostiuc, Sorin Hostiuc, Damian Hoy, Mohamed Hsairi, Aung Soe Htet, Guoqing Hu, Abdullatif Husseini, Trang Huyen Nguyen, Kim Moesgaard Iburg, Ehimario Igumbor, Usman Iqbal, Sheikh Mohammed Shariful Islam, Farhad Islami, Nader Jahanmehr, Rajesh Jain, Sudhir Jain, Mihajlo Jakovljevic, Mehdi Javanbakht, Achala Jayatilleke, Sun Ha Jee, Panniyammakal Jeemon, John Ji, Sarah Johnson, Jost B. Jonas, Jacek Jozwiak, Mikk Jürisson, Zubair Kabir, Rajendra Kadel, Amaha Kahsay, Rizwan Kalani, Manoochehr Karami, André Karch, Corine Karema, Seyed M. Karimi, Amir Kasaeian, Getachew Mullu Kassa, Nicholas J Kassebaum, Marzieh Katibeh, Srinivasa Vittal Katikireddi, Anil Kaul, Norito Kawakami, Peter Keiyoro, Andre Keren, Morteza Abdullatif Khafaie, Nauman Khalid, Ibrahim Khalil, Muhammad Ali Khan, Young-Ho Khang, Alireza Khatony, Abdullah T. Khoja, Ardeshir Khosravi, Mohammad Hossein Khosravi, Jagdish Khubchandani, Aliasghar Kiadaliri, Cho-Il Kim, Daniel Kim, Jun Kim, Young-Eun Kim, Anh Kim Dang, Adnan Kisa, Katarzyna Kissimova-Skarbek, Niranjana Kissoon, Mika Kivimaki, Marcus Kleber, Ann Kristin Knudsen, Sonali Kochhar, Soewarta Kosen, Parvaiz A Koul, Ai Koyanagi, Michael Kravchenko, Kewal Krishan, Barthelemy Kuate Defo, Burcu Kucuk Bicer, G Anil Kumar, Manasi Kumar, Pushpendra Kumar, Michael Kutz, Sheetal Lad, Dharmesh Lal, Ratilal Laloo, Hilton Lam, Van Lansingh, Dennis Laryea, Yirga Legesse, Misgan Legesse Liben, James Leigh, Cheru T Leshargie, Xiaohong Li, Yichong Li, Juan Liang, Xiaofeng Liang, Lee-Ling Lim, Stephen Lim, Shiwei Liu, Alan Lopez, Paulo Lotufo, Stefan Ma, Eryln Rachelle Macarayan, Hassan Magdy Abd El Razek, Mohammed Magdy Abd El Razek, Dhaval Maghavani, Marek Majdan, Reza Majdzadeh, Azeem Majeed, Reza Malekzadeh, Mohammad Ali Mansournia, Joemer Maravilla, Wagner Marcenes, Jose Martinez-Raga, Francisco Rogerlândio Martins-Melo, Winfried März, Felix Masiye, Mohsen Mazidi, John Mcgrath, Man Mohan Mehndiratta, Ravi Mehrotra, Kala Mehta, Varshil Mehta, Tesfa Mekonen, Tefera Chane Mekonnen, Kidanu Meles, Addisu Melese, Mulugeta Melku, Peter Memiah, Ziad Memish, Walter Mendoza, Desalegn Tadesse Mengistu, Getnet Mengistu, Zerihun Menkalew Zenebe, Beyene Meressa, Atte Meretoja, Tuomo Meretoja, Tomislav Mestrovic, Haftay Berhane Mezgebe, Tomasz Miazgowski, Andreea Mirica, Erkin Mirrakhimov, Babak Moazen, Karzan Mohammad, Moslem Mohammadi, Shafiu Mohammed, Viswanathan Mohan, Ali H. Mokdad, Lorenzo Monasta, Ghobad Moradi, Mehdi Moradinazar, Lidia Morawska, Ilais Moreno Velasquez, Joana Morgado-Da-Costa, Shane Morrison,

Seyyed Meysam Mousavi, Achenef Muche, Ulrich Mueller, Manoj Murhekar, Srinivas Murthy, Kamarul Imran Musa, Jean Nachege, Gabriele Nagel, Mohden Naghavi, Seyed Sina Naghibi Irvani, Sanjeev Nair, Bruno Nascimento, Haseeb Nawaz, Ionut Negoii, Ruxandra Irina Negoii, Charles Newton, Frida Ngalesoni, Josephine Ngunjiri, Ha Nguyen, Huong Nguyen, Ana Maria Nogales Vasconcelos, Nomonde Nolutshungu, Shuhei Nomura, Mehdi Noroozi, Bo Norrving, Jean Jacques Noubiap, Hamid Reza Nouri, Malihe Nourollahpour, Okechukwu Ogah, Felix Ogbo, Anselm Okoro, Olanrewaju Oladimeji, Andrew T. Olagunju, Tinuke Olagunju, Bolajoko Olusanya, Jacob Olusanya, Sok King Ong, John Nelson Opio, Alberto Ortiz, Simon Øverland, Mayowa Owolabi, Mahesh P A, Smita Pakhale, Adrian Pana, Basant Kumar Panda, Songhomitra Panda-Jonas, Jeyaraj Pandian, Andrea Parisi, Eun-Kee Park, Shanti Patel, Scott Patten, Deepak Paudel, Neil Pearce, David Pereira, Krystle Perez, Norberto Perico, William Petri, Max Petzold, David Pigott, Dietrich Plass, Suzanne Polinder, Akram Pourshams, Hossein Poustchi, Swayam Prakash, V Prakash, Mostafa Qorbani, D. Alex Quistberg, Amir Radfar, Anwar Rafay, Alireza Rafiei, Fakher Rahim, Afarin Rahimi-Movaghar, Vafa Rahimi-Movaghar, Mahfuzar Rahman, Mohammad Hifz Ur Rahman, Sajjad Rahman, Fatemeh Rajati, Sasa Rajsic, Usha Ram, Chhabi Lal Ranabhat, Prabhat Ranjan, David Rawaf, Salman Rawaf, Christian Razo, Jürgen Rehm, Giuseppe Remuzzi, Andre Renzaho, Serge Resnikoff, Shahab Rezaeian, Horacio Riojas, María Jesús Ríos Blancas, Leonardo Roever, Luca Ronfani, Gholamreza Roshandel, Denis Roshchin, Ali Rostami, Dietrich Rothenbacher, Enrico Rubagotti, Rizwan S. Abdulkader, Soheil Saadat, Basema Saddik, Hosein Safari, Saeid Safiri, Mohammad Ali Sahraian, Mohamadreza Salahshoor, Nasir Salam, Joseph Salama, Payman Salamati, Yahya Salimi, Hamideh Salimzadeh, Evanson Z Sambala, Abdallah M. Samy, Bruno Sao Jose, Muthupandian Saravanan, Mayank Sardana, Shahabeddin Sarvi, Maheswar Satpathy, Arundhati Sawant, Monika Sawhney, Sonia Saxena, Mehdi Sayyah, Vinod Scaria, Elke Schaeffner, David C Schwebel, Falk Schwendicke, James Scott, Mario Šekerija, Sadaf Sepanlou, Edson Serván-Mori, Hosein Shabaninejad, Amira Shaheen, Masood Ali Shaikh, Mehran Shams-Beyranvand, Morteza Shamsizadeh, Mehdi Sharif, Jayendra Sharma, Meenakshi Sharma, Peilin Shi, Girma Temam Shifa, Ivy Shiue, Farhad Shokraneh, Soraya Siabani, Diego Augusto Santos Silva, João Pedro Silva, Dayane Silveira, Jasvinder Singh, Virendra Singh, Dhirendra Narain Sinha, Mekonnen Sisay, Freddy Sitas, Soheila Sobhani, Moslem Soofi, Joan B Soriano, Luisa Sorio Flor, Chandrashekhar T Sreeramareddy, Vasiliki Stathopoulou, Caitlyn Steiner, Mark Stokes, Agus Sudaryanto, Muawiyah Babale Sufiyan, Bruno Sunguya, Bryan L Sykes, Dillon Sylte, Cassandra Szoeki, Azmeraw T. Amare, Rafael Tabarés-Seisdedos, Mohammad Tavakkoli, Nuno Taveira, Gebre Teklemariam Demoz, Mohamad-Hani Temsah, Omar Temsah, Abdullah Terkawi, Belay Tessema, Mebrahtu Teweldemedhin, Nu Thi Truong, Laura Thomas, Nihal Thomas, Marcello Tonelli, Miguel Tortajada-Girbés, Marcos Roberto Tovani-Palone, Bach Tran, Khanh Bao Tran, Thomas Truelsen, Nikolaos Tsilimparis, Stefanos Tyrovolas, Kingsley N. Ukwaja, Irfan Ullah, Olalekan Uthman, Selen Begüm Uzun, Muthiah Vaduganathan, Afsane Vaezi, Gaurang Vaidya, Pascual Valdez, Tommi Vasankari, Narayanaswamy Venketasubramanian, Ramesh Vidavalur, Santos Villafaina, Sergey Vladimirov, Vasilij Vlassov, Fasil Wagnew, Yasir Waheed, Yanping Wang, Yuan-Pang Wang, Elisabete Weiderpass, Robert Weintraub, Inbal Weiss Salz, Andrea Werdecker, Ronny Westerman, Harvey Whiteford, Justyna Widecka, Katarzyna Widecka, Tissa Wijeratne, Charles Shey Wiysonge, Charles Wolfe, Shouling Wu, Grant Wyper, Gelin Xu, Rajaram Yadav, Bereket Yakob, Tomohide Yamada, Lijing Yan, Yasin Jemal Yasin, Pengpeng Ye, Gökalp Kadri Yentür, Alex Yeshaneh, Manaye Yihune, Ebrahim M. Yimer, Naohiro Yonemoto, Marcel Yotebieng, Mustafa Younis, Geevar Zachariah, Zoubida Zaidi, Maysaa El Zaki, Sojib Bin Zaman, Mohammad Zamani, Zohreh Zare, Kai Zhang, Xueying Zhang, Jun Zhu, Sanjay Zodpey, and Liesl Zuhlke.



### Developing methods or computational machinery

Ibrahim Abdollahpour, Rufus A. Adedoyin, Sutapa Agrawal, Mohammadesmaeil Akbari, Mehran Alijanzadeh, Christine Allen, Mohsen Asadi- Lari, Suleman Atique, Neeraj Bedi, Bayu Begashaw Bekele, Muhammad Shahdaat Bin Sayeed, Sait Menten Birlik, Donal Bisanzio, Dipan Bose, Charlton Callender, Austin Carter, Ahmad Daryani, Louisa Degenhardt, Getenet Dessie, Daniel Dicker, Mahbobeh Famararzi, Mohammad Fareed, Farshad Farzadfar, Samuel Finegold, Kyle Foreman, Tahvi Frank, Emanuela Gakidou, Peter Gething, Roderick Hay, Nathaniel Henry, Mehdi Hosseinzadeh, Molla Kahssay, Nicholas J Kassebaum, Muhammad Shahzeb Khan, Jun Kim, Adnan Kisa, Xie Rachel Kulikoff, Michael Kutz, Misgan Legesse Liben, James Leigh, Tim Lucas, Hassan Magdy Abd El Razek, Melvin Marzan, Sanjay Mehendale, Tefera Chane Mekonnen, Ted R Miller, Grant Nguyen, Michele Nguyen, Bolajoko Olusanya, Jacob Olusanya, Charles Parry, Chhabi Lal Ranabhat, Robert Reiner, Ehsan Sadeghi, Mohamadreza Salahshoor, Abdallah M. Samy, Maheswar Satpathy, Kathryn Schelonka, David C Schwebel, Mehdi Sharif, Tariq Jamal Siddiqi, Naris Silpakit, Virendra Singh, Vinay Srinivasan, Caitlyn Steiner, Leo Stewart, Patrick Sur, Ipsita Sutradhar, Dillon Sylte, Segen Tassew, Irfan Ullah, Muhammad Shariq Usman, Ronny Westerman, Lijing Yan, and Hunter York.

### Applying analytical methods to produce estimates

Aklilu Abrham Roba, Rufus A. Adedoyin, Rakesh Aggarwal, Sutapa Agrawal, Mehdi Ahmadi, Sayem Ahmed, Amani Nidhal Aichour, Ibtihel Aichour, Miloud Taki Eddine Aichour, Syed Mohamed Aljunid, Christine Allen, Seth Christopher Yaw Appiah, Olatunde Aremu, Mohsen Asadi- Lari, Arindam Basu, Bayu Begashaw Bekele, Gregory Bertolacci, Samir Bhatt, Sait Menten Birlik, Donal Bisanzio, Alexandra Brazinova, Charlton Callender, Austin Carter, Pankaj Chaturvedi, Devasahayam Christopher, Elizabeth Cromwell, Matthew Cunningham, Ahmad Daryani, Don Des Jarlais, Getenet Dessie, Daniel Dicker, Tim Driscoll, Dumessa Edessa, Christian Lycke Ellingsen, Aman Endries, Alireza Esteghamati, Hamed Fakhim, Garumma Feyissa, Samuel Finegold, Florian Fischer, Tahvi Frank, Peter Gething, Nima Hafezi Nejad, Hamid Y. Hassen, Roderick Hay, Nathaniel Henry, Long Hoang Nguyen, Ehimario Igumbor, Sarah Johnson, Madhanraj K , Manoochehr Karami, André Karch, Jun Kim, Anh Kim Dang, Adnan Kisa, Barthelemy Kuate Defo, Xie Rachel Kulikoff, Van Lansingh, Misgan Legesse Liben, James Leigh, Cheru T Leshargie, Samson Leta, Stephen Lim, Rafael Lozano, Tim Lucas, Melvin Marzan, Mohsen Mazidi, Tefera Chane Mekonnen, Zerihun Menlkalew Zenebe, Shafiu Mohammed, Ali H. Mokdad, Haseeb Nawaz, Grant Nguyen, Michele Nguyen, In-Hwan Oh, Bolajoko Olusanya, Jacob Olusanya, David Pigott, Alireza Rafiei, Mahfuzar Rahman, Chhabi Lal Ranabhat, Seyed Mohammad Riahi, Abdallah M. Samy, Maheswar Satpathy, Mehdi Sayyah, Masood Ali Shaikh, Mehdi Sharif, Girma Temam Shifa, Naris Silpakit, Diego Augusto Santos Silva, Virendra Singh, Karen Sliwa , Luisa Sorio Flor, Vinay Srinivasan, Leo Stewart, Patrick Sur, Dillon Sylte, Nu Thi Truong, Bach Tran, Khanh Bao Tran, Kingsley N. Ukwaja, Irfan Ullah, Theo Vos, Daniel Weiss, Ronny Westerman, Tissa Wijeratne, Jamal Yearwood, Miangotar Yode, Seok-Jun Yoon, Hunter York, Chuanhua Yu, and Zoubida Zaidi.

### Providing critical feedback on methods or results

Degu Abate, Kalkidan Hassen Abate, Aberash Abay, Solomon Mequanente Abay, Cristiana Abbafati, Nooshin Abbasi, Hedayat Abbastabar, Foad Abd-Allah, Omar Abdel-Rahman, Alireza Abdi, Ibrahim Abdollahpour, Ahmed Abdurahman, Haftom Abebe, Molla Abebe, Zegeye Abebe, Yihalem Abebe Belay, Teshome Abebo, Haftom Abraha, Aklilu Abrham Roba, Niveen Abu-Rmeileh, Pawan Acharya, Oladimeji Adebayo, Isaac Adedeji, Rufus A. Adedoyin, Victor Adekanmbi, Olatunji Adetokunboh, Tara Ballav Adhikari, Mina Adib, Kouablan Arsene Adou, Mohsen Afarideh, Ashkan Afshin, Gina Agarwal, Sargis

Aghayan, Anurag Agrawal, Sutapa Agrawal, Alireza Ahmadi, Mehdi Ahmadi, Muktar Ahmed, Sayem Ahmed, Amani Nidhal Aichour, Ibtihel Aichour, Miloud Taki Eddine Aichour, Ali Shafqat Akanda, Mohammadesmaeil Akbari, Mohammed Akibu, Rufus Akinyemi, Tomi Akinyemiju, Nadia Akseer, Fares Alahdab, Ziyad Al-Aly, Khurshid Alam, Animut Alebel, Alicia Aleman, Kefyalew Addis Alene, Ayman Al-Eyadhy, Mehran Alijanzadeh, Syed Mohamed Aljunid, Ala'a Alkerwi, Peter Allebeck, Jordi Alonso, Rajaa Al-Raddadi, Ubai Alsharif, Khalid Altirkawi, Nelson Alvis-Guzman, Sintayehu Ambachew, Erfan Amini, Walid Ammar, Yaw Ampem Amoako, Catalina Liliana Andrei, Sofia Androudi, Mina Anjomshoa, Degefaye Anlay, Hossein Ansari, Mustafa Geleto Ansha, Carl Abelardo Antonio, Olatunde Aremu, Johan Ärnlov, Al Artaman, Krishna K Aryal, Hamid Asayesh, Ephrem Tsegay Asfaw, Solomon Weldegebreal Asgedom, Reza Assadi, Zerihun Ataro, Tesfay Mehari Atey, Seyyed Shamsadin Athari, Suleman Atique, Sachin Atre, Madhu S. Atteraya, Engi F. Attia, Marcel Ausloos, Leticia Avila-Burgos, Euripide Avokpaho, Ashish Awasthi, Beatriz Paulina Ayala Quintanilla, Henok Tadesse Ayele, Wondimu Ayele, Rakesh Ayer, Peter Azzopardi, Natasha Azzopardi Muscat, Alaa Badawi, Amrit Banstola, Aleksandra Barac, Miguel A. Barboza, Simon Barquera, Lope Barrero, Huda Basaleem, Quique Bassat, Arindam Basu, Sanjay Basu, Bernhard Baune, Shahrzad Bazargan-Hejazi, Neeraj Bedi, Ettore Beghi, Masoud Behzadifar, Meysam Behzadifar, Yannick Béjot, Abate Bekele, Bayu Begashaw Bekele, Ezra Belay, Saba Abraham Belay, Michelle Bell, Aminu Bello, Derrick Bennett, Isabela Bensor, Adugnaw Berhane, Adam Berman, Eduardo Bernabe, Robert Bernstein, Tambe Bertrand Ayuk, Balem Demtsu Betsu, Mircea Beuran, Tina Beyranvand, Neeraj Bhala, Eesh Bhatia, Samir Bhatt, Suraj Bhattarai, Soumyadeep Bhaumik, Belete Biadgo, Ali Bijani, Boris Bikbov, Nigus Bililign, Muhammad Shahdaat Bin Sayeed, Sait Menten Birlik, Charles Birungi, Tuhin Biswas, Tone Bjørge, Archie Bleyer, Berrak Bora Başara, Dipan Bose, Cristina Bosetti, Soufiane Boufous, Oliver Brady, Nicola Luigi Bragazzi, Luisa Brant, Nicholas Breitborde, Hermann Brenner, Traolach Brugha, Reinhard Busse, Zahid Butt, Alessandra C Goulart, Lucero Cahuana-Hurtado, Charlton Callender, Jorge Cano, Mate Car, Rosario Cárdenas, Juan J Carrero, Felix Carvalho, Deborah Carvalho Malta, Carlos Castañeda-Orjuela, Franz Castro, Ferrán Catalá-López, Ester Cerin, Yazan Chaiah, Ana Champs, Jung-Chen Chang, Aparajita Chattopadhyay, Peggy Pei-Chia Chiang, Odgerel Chimed-Ochir, Ken Chin, Vesper Chisumpa, Jee-Young Choi, Hanne Christensen, Devasahayam Christopher, Sheng-Chia Chung, Flavia Cicuttini, Liliana G Ciobanu, Rafael Claro, Aaron Cohen, Maria Magdalena Constantin, Sara Conti, Cyrus Cooper, Paolo Angelo Cortesi, Monica Cortinovia, Alexandre Costa Pereira, Ewerton Cousin, Michael Criqui, Christopher Crowe, John Crump, Alexandra Cucu, Alemneh Kabeta Daba, Berihun Dachew, Abel Dadi, Lalit Dandona, Rakhi Dandona, Paul Dargan, Ahmad Daryani, José Das Neves, Tamirat Dasa, Kairat Davletov, Anand Dayama, Barbora De Courten, Fernando De La Hoz, Diego De Leo, Jan-Walter De Neve, Megbaru Debalkie, Louisa Degenhardt, Tizta Degfie, Robert P. Dellavalle, Edgar Denova-Gutiérrez, Kebede Deribe, Nikolaos Derveniz, Don Des Jarlais, Getenet Dessie, Samath Dharmaratne, Meghnath Dhimal, Daniel Dicker, Eric L. Ding, Shirin Djalalinia, David Teye Doku, Kate Dolan, Christl Donnelly, E. Ray Dorsey, Kerrie Doyle, Thomas M Drake, Tim Driscoll, Manisha Dubey, Eleonora Dubljanin, Bruce Duncan, Andre Duraes, Hediyeh Ebrahimi, Soheil Ebrahimpour, Dumessa Edessa, David Edvardsson, Anne Elise Eggen, Eyasu Ejeta, Mohammed Elfaramawi, Ziad El-Khatib, Christian Lycke Ellingsen, Ahmadali Enayati, Aman Endries, Benjamin Er, Babak Eshрати, Sharareh Eskandarieh, Reza Esmaeili, Alireza Esteghamati, Sadaf Esteghamati, Hamed Fakhim, Tamer Farag, Mahbobeh Faramarzi, Farzaneh Farhadi, Talha Farid, Carla Farinha, Andrea Farioli, Andre Faro, Farshad Farzadfar, Mohammad Hosein Farzaei, Mir Sohail Fazeli, Valery Feigin, Andrea B. Feigl, Fariba Feizy, Netsanet Fentahun, Joao Feranandes, Seyed-Mohammad Fereshtehnejad, Eduarda Fernandes, Tilayie Feto Gelano, Garumma Feyissa, Daniel Fijabi, Irina Filip, Samuel Finegold, Florian Fischer, Nataliya Foigt,

John Ford, Kyle Foreman, Carla Fornari, Richard Franklin, Takeshi Fukumoto, Nancy Fullman, João M. Furtado, Neal Futran, Adriana Galan, Silvano Gallus, Alberto L. García-Basteiro, Tigist Gashaw, Abadi Kahsu Gebre, Teshome Gebre, Gebremedhin Berhe Gebregergs, Tsegaye Gebrehiwot, Amanuel Tesfay Gebremedhin, Merhawi Gebremedhin, Afewerki Gebremeskel, Aregawi Gebreyesus Belay, Tilayie Gelano, Yalemzewod Gelaw, Johanna Geleijnse, Ayele Geleto, Ricard Genova-Maleras, Bradford Gessner, Sefonis Getachew, Kebede Embaye Gezae, Reza Ghadimi, Khalil Ghasemi Falavarjani , Maryam Ghasemi-Kasman, Hesam Ghiasvand , Mamata Ghimire, Alope Gopal Ghoshal, Kidu Gidey, Paramjit Gill, Tiffany Gill, Richard Gillum, Meaza Girma, Giorgia Giussani, Srinivas Goli, Ricardo Gomez, Mari Carmen Gomez-Cabrera, Philimon Gona, Amador Goodridge, Sameer Gopalani, Atsushi Goto, Bárbara Goulart, Ayman Grada, Giuseppe Grosso, Harish Gugnani, Andre Guimaraes, Yuming Guo, Rahul Gupta, Rajat Das Gupta, Rajeev Gupta, Tanush Gupta, Bishal Gyawali, Juanita Haagsma, Vladimir Hachinski, Nima Hafezi Nejad, Tekleberhan Beyene Hagos, Gessesew Bugssa Hailu, Arvin Haj-Mirzaian, Arya Haj-Mirzaian, Randah Hamadeh, Samer Hamidi, Graeme Hankey, Hilda Harb, Habtamu Hareri, Sivadasanpillai Harikrishnan, Hamidreza Haririan, Josep Maria Haro, Mehedi Hasan, Hadi Hassankhani, Hamid Y. Hassen, Rasmus Havmoeller, Roderick Hay, Simon Hay, Akbar Hedayatizadeh-Omran, Mohamed Hegazy, Behzad Heibati, Mohsen Heidari, Delia Hendrie, Andualem Henok, Ileana B. Heredia-Pi, Claudiu Herteliu, Fatemeh Heydarpour, Sousan Heydarpour, Long Hoang Nguyen, Michael Hole, Enayatollah Homaie Rad, Praveen Hoogar, Masako Horino, H Dean Hosgood, Mostafa Hosseini, Mihaela Hostiuc, Sorin Hostiuc, Damian Hoy, Guoqing Hu, John Huang, Abdullatif Hussein, Susan Hutfless, Trang Huyen Nguyen, Kim Moesgaard Iburg, Ehimario Igumbor, Olayinka Ilesanmi, Usman Iqbal, Oluwaseyi Isehunwa, Sheikh Mohammed Shariful Islam, Farhad Islami, Nader Jahanmehr, Mihajlo Jakovljevic, Spencer James, Mehdi Javanbakht, Sudha Jayaraman, Sun Ha Jee, Panniyammakal Jeemon, Ravi Prakash Jha, Vivekanand Jha, John Ji, Jost B. Jonas, Jacek Jozwiak, Suresh Jungari, Mikk Jürisson, Madhanraj K , Zubair Kabir, Rajendra Kadel, Amaha Kahsay, Molla Kahssay, Rizwan Kalani, Manoochehr Karami, Behzad Karami Matin, André Karch, Seyed M. Karimi, Hamidreza Karimi-Sari, Amir Kasaeian, Getachew Mullu Kassa, Tesfaye Kassa, Nicholas J Kassebaum, Marzieh Katibeh, Srinivasa Vittal Katikireddi, Vittal Katikireddi , Anil Kaul, Peter Keiyoro, Andre P Kengne, Yousef Khader, Morteza Abdullatif Khafaie, Nauman Khalid, Ibrahim Khalil, Ejaz Khan, Gulfaraz Khan, Muhammad Ali Khan, Muhammad Shahzeb Khan, Young-Ho Khang, Mona Khater, Habibolah Khazaie, Abdullah T. Khoja, Ardeshir Khosravi, Mohammad Hossein Khosravi, Aliasghar Kiadaliri, Getiye Kibret, Daniel Kim, Jun Kim, Young-Eun Kim, Anh Kim Dang, Ruth Kimokoti, Yohannes Kinfu, Sanjay Kinra, Adnan Kisa, Katarzyna Kissimova-Skarbek, Niranjana Kissoon, Mika Kivimaki, Luke Knibbs, Ann Kristin Knudsen, Sonali Kochhar , Yoshihiro Kokubo, Tufa Kolola, Jacek Kopec, Margaret Kosek, Parvaiz A Koul, Ai Koyanagi, Kewal Krishan, Sanjay Krishnaswami, Barthelémy Kuate Defo, Burcu Kucuk Bicer, Andreas Kudom, Ernst J. Kuipers, Xie Rachel Kulikoff, G Anil Kumar, Manasi Kumar, Pushpendra Kumar, Fekede Asefa Kumsa, Sheetal Lad, Alessandra Lafranconi, Dharmesh Lal, Ratilal Laloo, Hilton Lam, Faris Lami, Qing Lan, Sinead Langan, Van Lansingh, Dennis Laryea, Zohra Lassi, Arman Latifi, Pablo Lavados, Avula Laxmaiah, Jeffrey Lazarus, Paul Lee, Yirga Legesse, Misgan Legesse Liben, James Leigh, Cheru T Leshargie, Samson Leta, Miriam Levi, Shanshan Li, Lee-Ling Lim, Stephen Lim, Miteku Limenih, Shai Linn, Yang Liu, Rakesh Lodha, Chris Lonsdale, Alan Lopez, Scott Lorch, Stefan Lorkowski, Paulo Lotufo, Raimundas Lunevicius, Ronan Lyons, Stefan Ma, Crispin Mabika Mabika, Eryln Rachelle Macarayan, Mark Mackay, Fabiana Madotto, Hassan Magdy Abd El Razek, Mohammed Magdy Abd El Razek, Marek Majdan, Reza Majdzadeh, Azeem Majeed, Reza Malekzadeh, Manzoor Malik, Mohammedaman Mama, Abdullah Mamun, Mohammad Ali Mansournia, Lorenzo Mantovani, Chabila Mapoma, Dadi Marami, Joemer Maravilla, Wagner Marcenes, Jose Martinez-Raga, Sheila Martins,

Francisco Rogerlândio Martins-Melo, Melvin Marzan, Tivani Mashamba-Thompson, Felix Masiye, Benjamin Massenburg, Pallab K Maulik, Mohsen Mazidi, John Mcgrath, Suresh Mehata, Sanjay Mehendale, Kala Mehta, Varshil Mehta, Tesfa Mekonen, Tefera Chane Mekonnen, Hagazi Gebre Meles, Kidanu Meles, Addisu Melese, Mulugeta Melku, Peter Memiah, Walter Mendoza, Desalegn Tadesse Mengistu , Getnet Mengistu , Zerihun Menkalew Zenebe, George Mensah, Beyene Meressa, Seid Tiku Mereta, Atte Meretoja, Tuomo Meretoja, Tomislav Mestrovic, Haftay Berhane Mezgebe, Bartosz Miazgowski, Tomasz Miazgowski, Ted R Miller, Gk Mini, Andreea Mirica, Erkin Mirrakhimov, Babak Moazen, Nurilign Moges, Moslem Mohammadi, Mohammed Mohammed, Shafiu Mohammed, Ali H. Mokdad, Mulugeta Molla, Mariam Molokhia, Lorenzo Monasta, Ghobad Moradi, Mahmoudreza Moradi, Maziar Moradi-Lakeh, Mehdi Moradinazar, Paula Moraga, Lidia Morawska, Joana Morgado-Da-Costa, Shane Morrison, Marilita Moschos, Seyyed Meysam Mousavi, Achenef Muche, Kindie Fentahun Muchie, Ulrich Mueller, Satinath Mukhopadhyay, Tasha Murphy, Christopher Murray, Srinivas Murthy, Jonah Musa, Kamarul Imran Musa, Ghulam Mustafa, Jean Nachega, Gabriele Nagel, Mohden Naghavi, Seyed Sina Naghibi Irvani, Aliya Naheed, Azin Nahvijou, Gurudatta Naik, Farid Najafi, Vinay Nangia, Jobert Richie Nansseu, Bruno Nascimento, Haseeb Nawaz, Busisiwe Ncama, Ionut Negoii, Ruxandra Irina Negoii, Subas Neupane, Charles Newton, Frida Ngalesoni, Josephine Ngunjiri, Grant Nguyen, Muhammad Imran Nisar, Ana Maria Nogales Vasconcelos, Mehdi Noroozi, Bo Norrving, Jean Jacques Noubiap, Hamid Reza Nouri, Malihe Nourollahpour, Mohammad Reza Nowroozi, Dina Nur Anggraini Ningrum, Peter Nyasulu, Richard Ofori-Asenso, Okechukwu Ogah, Felix Ogbo, In-Hwan Oh, Anselm Okoro, Olanrewaju Oladimeji, Andrew T. Olagunju, Tinuke Olagunju, Pedro Olivares, Bolajoko Olusanya, Jacob Olusanya, John Nelson Opio, Eyal Oren, Alberto Ortiz, Justin R Ortiz, Erika Ota, Stanislav Otstavnov, Simon Øverland, Mayowa Owolabi, Abayomi Oyekale, Mahesh P A, Rosana Pacella, Smita Pakhale, Abhijit Pakhare, Adrian Pana, Basant Kumar Panda, Songhomitra Panda-Jonas, Achyut Raj Pandey, Jeyaraj Pandian, Eun-Kee Park, Charles Parry, Hadi Parsian, Shanti Patel, Ajay Patle, Scott Patten, George Patton, Deepak Paudel, Emmanuel Peprah, David Pereira, Norberto Perico, Aslam Pervaiz, Konrad Pesudovs, Michael R. Phillips, David Pigott, Julian Pillay, Meghdad Pirsahab, Farhad Pishgar, Dietrich Plass, Suzanne Polinder, Constance Dimity Pond, Svetlana Popova, Maarten Postma, Farshad Pourmalek, Akram Pourshams, Hossein Poustchi, Dorairaj Prabhakaran, Swayam Prakash, V Prakash, Narayan Prasad, Mostafa Qorbani, D. Alex Quistberg, Amir Radfar, Anwar Rafay, Fakher Rahim, Kazem Rahimi, Afarin Rahimi-Movaghar, Vafa Rahimi-Movaghar, Mahfuzar Rahman, Muhammad Aziz Rahman, Sajjad Rahman, Rajesh Kumar Rai, Fatemeh Rajati, Usha Ram, Chhabi Lal Ranabhat, Prabhat Ranjan, Annemarei Ranta, Davide Rasella, David Rawaf, Salman Rawaf, Sarah Ray, Christian Razo, Maria Albertina Rego, Jürgen Rehm, Robert Reiner, Cesar Reis, Giuseppe Remuzzi, Andre Renzaho, Serge Resnikoff, Satar Rezaei, Shahab Rezaeian, Mohammad Sadegh Rezai, Seyed Mohammad Riahi, Antonio Luiz Ribeiro, Horacio Riojas, María Jesús Ríos Blancas, Kedir Teji Roba, Stephen Robinson, Leonardo Roever, Luca Ronfani, Gholamreza Roshandel, Ali Rostami, Dietrich Rothenbacher, George Ruhago, Rizwan S. Abdulkader, Yogesh Sabde, Perminder Sachdev, Basema Saddik, Hosein Safari, Roya Safari-Faramani, Mahdi Safdarian, Saeid Safiri, Rajesh Sagar, Amirhossein Sahebkar, Mohammad Ali Sahraian, Haniye Sadat Sajadi, Mohamadreza Salahshoor, Nasir Salam, Raphael Saldanha, Yahya Salimi, Hamideh Salimzadeh, Evanson Z Sambala, Abdallah M. Samy, Juan Sanabria, Maria Dolores Sanchez-Niño, Itamar Santos, João Vasco Santos, Milena Santric Milicevic, Bruno Sao Jose, Muthupandian Saravanan, Mayank Sardana, Abdur Razzaque Sarker, Benn Sartorius, Brijesh Sathian, Thirunavukkarasu Sathish, Maheswar Satpathy, Miloje Savic, Monika Sawhney, Sonia Saxena, Mehdi Sayyah, Elke Schaeffner, Maria Inês Schmidt, Ione Schneider, Ben Schöttker, Aletta Schutte, David C Schwebel, Falk Schwendicke, James Scott, Sadaf Sepanlou, Edson

Serván-Mori, Hosein Shabaninejad, Azadeh Shafieesabet, Amira Shaheen, Masood Ali Shaikh, Raad Shakir, Mehran Shams-Beyranvand, Mohammadbagher Shamsi, Heidar Sharafi, Kiomars Sharafi, Mehdi Sharif, Mahdi Sharif-Alhoseini, Rajesh Sharma, Aziz Sheikh, Kevin Sheth, Kenji Shibuya, Girma Temam Shifa, Mika Shigematsu, Rahman Shiri, Ivy Shiue, Mark Shrime, Sharvari Shukla, Si Si, Soraya Siabani, Tariq Jamal Siddiqi, Inga Dora Sigfusdottir, Rannveig Sigurvinsdottir, Diego Augusto Santos Silva, Dayane Silveira, Narayana Sarma Singam, Jasvinder Singh, Virendra Singh, Anju Sinha, Dharendra Narain Sinha, Mekonnen Sisay, Freddy Sitas, Adauto Martins Soares Filho, Badr Sobaih, Soheila Sobhani, Moslem Soofi, Joan B Soriano, Ireneous Soyiri, Luciano Sposato, Chandrashekhar T Sreeramareddy, Rakesh Srivastava, Nicholas Steel, Dan J Stein, Caitlyn Steiner, Mark Stokes, Muawiyah Babale Sufiyan, Gerhard Sulo, Bruno Sunguya, Ipsita Sutradhar, Bryan L Sykes, Pn Sylaja, Dillon Sylte, Cassandra Szoeki, Azmeraw T. Amare, Rafael Tabarés-Seisdedos, Takahiro Tabuchi, Santosh Tadakamadla, Ken Takahashi, Nikhil Tandon, Segen Tassew, Nuno Taveira, Arash Tehrani-Banhashemi, Gebre Teklemariam Demoz, Habtamu Temesgen, Mohamad-Hani Temsah, Omar Temsah, Tewodros Tesfa, Belay Tessema, Mebrahtu Teweldemedhin, Js Thakur, Kavumpurathu Thankappan, Nu Thi Truong, Laura Thomas, Nihal Thomas, Amanda Thrift, Binyam Tilahun, Quyen G. To, Ruoyan Tobe-Gai, Marcello Tonelli, Roman Topor-Madry, Fotis Topouzis, Miguel Tortajada-Girbés, Marcos Roberto Tovani-Palone, Jeffrey Towbin, Bach Tran, Khanh Bao Tran, Srikanth Tripathy, Thomas Truelsen, Desalegn Tsegaw, Nikolaos Tsilimparis, Lorraine Tudor Car, E Tuzcu Tuzcu, E. Murat Tuzcu, Stefanos Tyrovolas, Kingsley N. Ukwaja, Irfan Ullah, Muhammad Shariq Usman, Olalekan Uthman, Selen Begüm Uzun, Muthiah Vaduganathan, Afsane Vaezi, Pascual Valdez, Santosh Varughese, Tommi Vasankari, Narayanaswamy Venketasubramanian, Ramesh Vidavalur, Francesco S Violante, Vasiliy Vlassov, Stein Emil Vollset, Theo Vos, Kia Vosoughi, Isidora Vujcic, Gregory Wagner, Fasil Wagnaw, Yasir Waheed, Yuan-Pang Wang, Molla Mesele Wassie, Elisabete Weiderpass, Robert Weintraub, Jordan Weiss, Inbal Weiss Salz, Fitsum Weldegebreal, Seifu Kebede Weldegiorgis, Andrea Werdecker, Ronny Westerman, Tissa Wijeratne, Andrea Sylvia Winkler, Charles Shey Wiysonge, Charles Wolfe, Grant Wyper, Gelin Xu, Bereket Yakob, Tomohide Yamada, Lijing Yan, Yuichiro Yano, Mehdi Yaseri, Yasin Jemal Yasin, Pengpeng Ye, Gökalp Kadri Yentür, Alex Yeshaneh, Manaye Yihune, Ebrahim M. Yimer, Nega Yimer, Zemenu Yohannes, Naohiro Yonemoto, Seok-Jun Yoon, Marcel Yotebieng, Mustafa Younis, Mahmoud Yousefifard, Chuanhua Yu, Vesna Zadnik, Shamsa Zafar, Zoubida Zaidi, Maysaa El Zaki, Sojib Bin Zaman, Mohammad Zamani, Zohreh Zare, Hajo Zeeb, Taddese Zerfu, Xueying Zhang, Inbar Zucker, and Liesl Zuhlke.

#### [Drafting the work or revising it critically for important intellectual content](#)

Nooshin Abbasi, Yihalem Abebe Belay, Isaac Adedeji, Olatunji Adetokunboh, Mohsen Afarideh, Hamid Ahmadieh, Mohammadesmaeil Akbari, Tomi Akinyemiju, Fares Alahdab, Reza Alizadeh-Navaei, Megha Arora, Peter Azzopardi, Hamid Badali, Bernhard Baune, Neeraj Bhala, Sait Menten Birlik, Oliver Brady, Traolach Brugha, Juan J Carrero, Felix Carvalho, Franz Castro, Devasahayam Christopher, Cyrus Cooper, John Crump, Alemneh Kabeta Daba, Ahmad Daryani, Dragos Davitoiu, Jan-Walter De Neve, Selina Deiparine, Getenet Dessie, Daniel Dicker, Kate Dolan, Thomas M Drake, Andre Duraes, David Edvardsson, Sadaf Esteghamati, Mahbobeh Faramarzi, Mohammad Hosein Farzaei, Joao Feranandes, Seyed-Mohammad Fereshtehnejad, Eduarda Fernandes, Nataliya Foigt, Nancy Fullman, Emmanuela Gakidou, Alberto L. García-Basteiro, Merhawi Gebremedhin, Aregawi Gebreyesus Belay, Ricard Genova-Maleras, Kebede Embaye Gezae, Maryam Ghasemi-Kasman, Amador Goodridge, Rajat Das Gupta, Rajeev Gupta, Mehedi Hasan, Hadi Hassankhani, Behzad Heibati, Long Hoang Nguyen, Enayatollah Homaie Rad, Masako Horino, Farhad Islami, Ravi Prakash Jha, Jost B. Jonas, Surya Kant, Manoochehr Karami, Behzad Karami Matin, Getachew Mullu Kassa, Grant Kemp, Yousef Khader, Alireza Khajavi,

Mona Khater, Daniel Kim, Anh Kim Dang, Mika Kivimaki, Ann Kristin Knudsen, Parvaiz A Koul, Dharmesh Lal, Qing Lan, Sonia Lansky, Cheru T Leshargie, Xiaofeng Liang, Stephen Lim, Alan Lopez, Crispin Mabika Mabika, Emilie Maddison, Hassan Magdy Abd El Razek, Mohammed Magdy Abd El Razek, Azeem Majeed, Reza Malekzadeh, Ana Laura Manda, Mohammad Ali Mansournia, Joemer Maravilla, Francisco Rogerlândio Martins-Melo, Benjamin Massenburg, Sanjay Mehendale, Kidanu Meles, Tuomo Meretoja, Karzan Mohammad, Maryam Mohammadi-Khanaposhtani, Ghobad Moradi, Mehdi Moradinazar, Abbas Mosapour, Erin Mullany, Christopher Murray, Ghulam Mustafa, Nahid Neamati, Grant Nguyen, Molly Nixon, Ole F. Norheim, Andrew T. Olagunju, Justin R Ortiz, Simon Øverland, Songhomitra Panda-Jonas, Emmanuel Peprah, Konrad Pesudovs, Michael R. Phillips, Vafa Rahimi-Movaghar, Muhammad Aziz Rahman, Fatemeh Rajati, Sarah Ray, Satar Rezaei, Seyed Mohammad Riahi, Leonardo Roever, Ehsan Sadeghi, Hosein Safari, Sare Safi, Saeid Safiri, Mohamadreza Salahshoor, Milena Santric Milicevic, Bruno Sao Jose, Muthupandian Saravanan, Shahabeddin Sarvi, Maheswar Satpathy, Katya Shackelford, Mehdi Sharif, Mika Shigematsu, Inga Dora Sigfusdottir, Rannveig Sigurvinsdottir, Virendra Singh, Caitlyn Steiner, Leo Stewart, Ipsita Sutradhar, Segen Tassew, Nuno Taveira, Nu Thi Truong, Marcos Roberto Tovani-Palone, Bach Tran, Olalekan Uthman, Yuan-Pang Wang, Nicole Weaver, Robert Weintraub, Manaye Yihune, Miangotar Yode, Hunter York, Maysaa El Zaki, Inbar Zucker, and Liesl Zuhlke.

#### [Extracting, cleaning, or cataloging data; designing or coding figures and tables](#)

Hedayat Abbastabar, Foad Abd-Allah, Ibrahim Abdollahpour, Rakesh Aggarwal, Alireza Ahmadi, Christine Allen, Erfan Amini, Mohsen Asadi- Lari, Ephrem Tsegay Asfaw, Tesfay Mehari Atey, Henok Tadesse Ayele, Huda Basaleem, Shahrzad Bazargan-Hejazi, Bayu Begashaw Bekele, Derrick Bennett, Adugnaw Berhane, Gregory Bertolacci, Mircea Beuran, Muhammad Shahdaat Bin Sayeed, Sait Mentés Birlik, Donal Bisanzio, Julio Cesar Campuzano, Alanur Cavlin, Yazan Chaiah, Wanqing Chen, John Crump, Matthew Cunningham, Ahmad Daryani, Robert P. Dellavalle, Getenet Dessie, Daniel Dicker, Iqbal Elyazar, Aman Endries, Benjamin Er, Sergey Ermakov, Hamed Fakhim, Andre Faro, Takeshi Fukumoto, John Fuller, Nancy Fullman, Gbetoho Gankpe, Yuming Guo, Mehedi Hasan, Yihua He, Behzad Heibati, Mehdi Hosseinzadeh, Damian Hoy, Trang Huyen Nguyen, Chad Ikeda, Panniyammakal Jeemon, Vivekanand Jha, Sarah Johnson, Manoochehr Karami, André Karch, Tesfaye Kassa, Vittal Katikireddi, Norito Kawakami, Grant Kemp, Andre Keren, Morteza Abdullatif Khafaie, Mohammad Hossein Khosravi, Jagdish Khubchandani, Cho-Il Kim, Jun Kim, Young-Eun Kim, Adnan Kisa, Xie Rachel Kulikoff, Michael Kutz, Misgan Legesse Liben, James Leigh, Shanshan Li, Xiaofeng Liang, Shiwei Liu, Stefan Ma, Emilie Maddison, Dhaval Maghavani, Reza Malekzadeh, Mohammad Ali Mansournia, Wagner Marcenes, Benjamin Massenburg, Mohsen Mazidi, Kidanu Meles, Ziad Memish, Zerihun Menkalew Zenebe, Mulugeta Molla, Lorenzo Monasta, Maziar Moradi-Lakeh, Abbas Mosapour, Ghulam Mustafa, Mohden Naghavi, Haseeb Nawaz, Ionut Negoï, Ruxandra Irina Negoï, Mohammad Reza Nowroozi, Mayowa Owolabi, Andrea Parisi, Ajay Patle, David Pereira, Max Petzold, David Pigott, Hossein Poustchi, Narayan Prasad, Anwar Rafay, Alireza Rafiei, Mahfuzar Rahman, Nickolas Reinig, Seyed Mohammad Riahi, Luca Ronfani, Enrico Rubagotti, Hosein Safari, Saeid Safiri, Payman Salamati, Abdallah M. Samy, Shahabeddin Sarvi, Maheswar Satpathy, Arundhati Sawant, Monika Sawhney, Kathryn Schelonka, Sadaf Sepanlou, Mehdi Sharif, Jun She, Peilin Shi, Farhad Shokraneh, Soraya Siabani, Virendra Singh, Dharendra Narain Sinha, Vegard Skirbekk, Chandrashekhar T Sreeramareddy, Vinay Srinivasan, Leo Stewart, Patrick Sur, Dillon Sylte, Rafael Tabarés-Seisdedos, Mohammad Tavakkoli, Omar Temsah, Ruoyan Tobe-Gai, Anna Torre, Kingsley N. Ukwaja, Irfan Ullah, Gaurang Vaidya, Tommi Vasankari, Yasir Waheed, Inbal Weiss Salz, Shouling Wu, Nega Yimer, Naohiro Yonemoto, and Hunter York.

### Managing the overall research enterprise

Ashkan Afshin, Peter Allebeck, Megha Arora, Zulfiqar Bhutta, Deborah Carvalho Malta, Aaron Cohen, Elizabeth Cromwell, Lalit Dandona, Rakhi Dandona, Louisa Degenhardt, Samath Dharmaratne, Daniel Dicker, Charbel El Bcheraoui, Tamer Farag, Valery Feigin, Kyle Foreman, Nancy Fullman, Emmanuela Gakidou, Tsegaye Gebrehiwot, Peter Gething, Simon Hay, Spencer James, Nicholas Kassebaum, Ibrahim Khalil, Heidi Larson, Xiaofeng Liang, Stephen Lim, Alan Lopez, Rafael Lozano, Felix Masiye, George Mensah, Awoke Misganaw, Ali Mokdad, Erin Mullany, Kate Muller, Christopher Murray, Mohsen Naghavi, Molly Nixon, Elaine Nsoesie, David Pigott, Robert Reiner, Joseph Salama, Benn Sartorius, Katya Shackelford, Caitlyn Steiner, Roman Topor-Madry, Stein Emil Vollset, Theo Vos, Andrea Werdecker, Harvey Whiteford, and Maigeng Zhou.

### Did not provide contribution information

Dash A P, Jemal Abdela, Baffour Awuah, Sree Bhushan, Jacqueline Castillo-Rivas, Leslie Cooper, Drew Dolgert, Maryam Farvid, Amiran Gamkrelidze, Mohammad Rasoul Ghadami, Alexis Handal, Ankur Joshi, Prakash K.C., Narges Karimi, Hossein Kazemeini, Zhila Kazemi, Ali Kazemi Karyani, Ketevan Kereselidze, Maia Kereselidze, Tripti Khanna, Georgy Lebedev, Giancarlo Logroscino, Ralph Maddison, Noushin Mohammadifard, Mousa Mohammadnia-Afrouzi, Gvs Murthy, Sahar Saeedi Moghaddam, Yahya Safari, Nizal Sarrafzadegan, Marina Shakhnazarova, Reza Shirkoohi, Yohanes Ayele Wondimkun, Paul Yip, and Engida Yisma.

## Section 1: GBD Overview

### Section 1.1: Geographic Locations of the Analysis

The locations included in GBD 2017 were arranged into a set of hierarchical categories composed of seven super-regions and a further nested set of 21 regions containing 195 countries and territories (Appendix Table 2). Each year, the GBD Study undertakes subnational analysis for a small number of new countries, and continues to estimate subnationally any that were undertaken in previous cycles. Subnational estimation in GBD 2017 includes five new countries (Ethiopia, Iran, New Zealand, Norway, Russia), and all countries previously estimated at subnational levels (GBD 2013: China, Mexico, United Kingdom; GBD 2015: Brazil, India, Japan, Kenya, South Africa, Sweden, and the United States; GBD 2016: Indonesia, United Kingdom). All analyses are at the first level of administrative organization within each country with the exception of New Zealand separately by Maori ethnicity, Sweden which has been estimated for Stockholm and non-Stockholm, and the United Kingdom which has been estimated down to the local government authority level). All subnational estimates for these countries were incorporated into model development and evaluation as part of the GBD 2017 study. To meet data use requirements, in this publication we present only subnational estimates that have been already published elsewhere (Brazil, India, Japan, Kenya, Mexico, Sweden, United Kingdom, United States); given space constraints these results are presented in appendix tables and figures instead of the main text (see Supplementary Results Appendix). Subnational estimates for countries with populations larger than 200 million (measured using our most recent year of published estimates) that have not yet been published elsewhere are presented wherever estimates are illustrated with maps, but are not included in data tables.

### Section 1.2: Time Period of the Analysis

A complete set of all-cause deaths and rates were computed for the years 1950-2017.

All GBD 2017 mortality results and online data visualizations will be made available upon paper acceptance. Results for all GBD metrics will be made available upon paper acceptance.

### Section 1.3: Statement of GATHER Compliance

This study complies with the Guidelines for Accurate and Transparent Health Estimates Reporting (GATHER) recommendations. We have documented the steps involved in our analytical procedures and detailed the data sources. See Appendix Table 1 for GATHER checklist.

The GATHER recommendations can be found here: <http://gather-statement.org/>



## Section 1.4: List of abbreviations

1q0: probability of death from birth to age 1 year

4q1: probability of death from age 1 year to age 4 years

5m0: under-5 mortality rate

5q0: probability of death from birth to age 5 years

45m15: mortality rate from age 15 years to 60 years

45q15: probability of death from age 15 years to 60 years

ACLED: Armed Conflict Location and Event Database

ART: antiretroviral therapy

BTL: International Classification of Diseases Basic Tabulation List

CBH: complete birth history

CD4: CD4+ T lymphocyte; an indicator of immune function

CIBA: cohort incidence bias adjusted

CIBA-SPECTRUM: cohort incidence bias adjusted spectrum output

CoD: causes of death

CODEm: Cause of Death Ensemble model

DALY: disability-adjusted life-year

DDM: death distribution methods

DHS: Demographic and Health Surveys

DSP: Disease Surveillance Points

EM-DAT: Centre for Research on the Epidemiology of Disasters' International Disaster Database

enn: early neonatal

EPP: Estimation and Projection Package

GATHER: Guidelines for Accurate and Transparent Health Estimates Reporting

GBD: Global Burden of Disease

GEMS: Global Enteric Multicenter Study

GGB: generalized growth balance

GGBSEG: combined generalized growth balance and synthetic extinct generation

GIDEON: Global Infectious Diseases and Epidemiology Network

GK: Gakidou-King

GPR: Gaussian process regression

HDI: human development index

HIV: human immunodeficiency virus

HIV CDR: Crude death rate due to HIV/AIDS

HMD: Human Mortality Database

ICD: International Classification of Disease

IPUMS: Integrated Public Use Microdata Series

LDI: lag-distributed income per capita

Inn: late neonatal

MAD: median absolute deviation

MCCD: Medical Certification of Causes of Death

MCMC: Markov Chain Monte Carlo

MICS: Multiple Indicator Cluster Surveys

NCD: non-communicable disease

nm<sub>x</sub>: mortality rate without fatal discontinuities

PCVA: Physician Certified Verbal Autopsy

pnn: post neonatal

PRIO: Peace Research Institute Oslo

SBH: summary birth history

SCAD: Social Conflict Analysis Database

SDI: Socio-demographic Index

SEER: Surveillance, Epidemiology, and End Results Program

SEG: synthetic extinct generation

SRS: Sample Registration System

ST-GPR: Spatiotemporal Gaussian process regression

U5MR: under-5 mortality rate:

UCDP: Uppsala Conflict Data Program

UI: uncertainty interval

UN: United Nations

UNAIDS: Joint United Nations Program on HIV/AIDS

UNICEF: United Nations International Children's Emergency Fund

USAID: United States Agency for International Development

VR: vital registration

WFS: World Fertility Surveys

WPP 15: World Population Prospects 2015

WHO: World Health Organization

YLD: years lived with disability

YLL: years of life lost

## Section 1.5: GBD results overview

Results from the Global Burden of Disease Study (GBD 2017) are now measured in terabytes. Results will be made available upon manuscript acceptance in an interactive data-downloading tool on the Global Health Data exchange (GHDx).

The current version of the data download tool is available in the GHDx and will contains core summary results for the GBD 2017 upon manuscript acceptance: <http://ghdx.healthdata.org/gbd-results-tool>. The core summary results include deaths, YLLs, years lived with disability (YLDs), and disability-adjusted life-years (DALYs). The GHDx includes data for causes, risks, cause-risk attribution, aetiologies, and impairments.

In the GBD 2017 version, the GHDx tool also contains measures such as prevalence and incidence as well as rate of change data. Data above a certain size cannot be viewed online but can be downloaded. Depending on the size of the download, users may need to enter an email address; a download location will be sent to them when the files are prepared.

## Section 1.6: Data input sources overview

GBD 2017 incorporated a large number and wide variety of input sources to estimate mortality, causes of death and illness, and risk factors for 195 countries and territories from 1990-2017. These input sources are accessible through an interactive citation tool available in IHME's GHDx.

Users can retrieve citations for a specific GBD component, cause or risk, and location by choosing from the available selection boxes. They can then view and access GHDx records for input sources and export a CSV file that includes the GHDx metadata, citations, and information about where the data were used in GBD. Additional metadata for each input source are available through the citation tool, as required by the GATHER statement.

The citation tool is accessible through the GHDx at <http://ghdx.healthdata.org/gbd-2017/data-input-sources>

## Section 1.7: Funding Sources

Research reported in this publication was supported by the Bill & Melinda Gates Foundation, the National Institute on Aging of the National Institutes of Health (award P30AG047845), and the National Institute of Mental Health of the National Institutes of Health (award R01MH110163). The content is solely the responsibility of the authors and does not necessarily represent the official views of the Bill & Melinda Gates Foundation or the National Institutes of Health.

## Section 2: GBD 2017 All-Cause Mortality and HIV Estimation Process

### Section 2.1: Overview

The goal of the all-cause mortality estimation process for the GBD was to produce the most accurate time series estimates for 1950 to 2017 for all-cause deaths and death rates broken down into the GBD age groups and by sex for all 918 locations in the GBD 2017. This task was necessarily complicated by the diversity of data sources (Appendix Tables 3 and 4) available for all-cause mortality for different age groups, the known biases in some sources, and the powerful effects of the HIV epidemic on the age pattern of mortality in countries with large affected populations. In this appendix, we divide the analysis

of all-cause mortality into five distinct but interconnected areas: probability of death between birth and age 5 years (5q0), probability of death between age 15 years and 60 years (45q15), estimation of a complete set of age-specific death rates, estimation of HIV mortality, and final estimates of age-specific mortality including HIV and fatal discontinuities. While HIV was a cause of death, we present some information on the epidemiological modeling of HIV in this section because of the close interdependency between HIV mortality estimation and the all-cause mortality estimation process.

If all countries had complete vital registration (VR) systems recording the event of death and periodic censuses, the task of estimating all-cause mortality rates would have been much easier. However, many countries of lower-to-middle levels of sociodemographic development produce incomplete mortality records, and multiple sources must be used to infer levels, trends, and patterns of mortality. The analytical building blocks of the process, as shown in Appendix Figure 1, were repeated through two full iterations. This iteration resulted from the interdependence between the HIV epidemiological models on estimates of HIV-free all-cause mortality and the use of estimated HIV crude death rates as an input to the 5q0, 45q15, and age-specific mortality models. In the following sections we further discuss each analytical module, identifying primary input data and analytical processes.

## Section 2.2: Child mortality

### Section 2.2.1: Data sources

#### *VR from CoD*

Data were provided by the GBD causes of death (CoD) research team and were aggregated into total age-sex-specific all-cause mortality for each location-year.

Data intended for use in causes of death modeling were assessed for quality with respect to consistency of cause fractions, diagnostic accuracy, and missing data, whereas for all-cause mortality modeling it was more important that data were fully representative of the given estimation area and were consistent with other all-cause mortality data sources. Thus, there were cases in which VR data prepared for cause-specific modeling could not be used in all-cause modeling or had to be adjusted based on degree of completeness before being used.

There were instances where VR data used in cause-specific mortality analysis had been collapsed to Basic Tabulation List (BTL) format rather than in full cause classification list format (e.g., ICD9). In some of these cases, we elected to use WHO data instead.

#### *VRs, sample registration systems, and DSPs from other sources*

We endeavored to include all available data from VR systems as inputs in our all-cause mortality estimation process. To achieve this, we utilized a number of multi-country VR sources, including the WHO Mortality Database, the Human Mortality Database, United Nations Demographic Yearbooks, and OECD (Organisation for Economic Co-operation and Development) databases. These multi-country sources were regularly updated in our systems when new data were added. Beyond multi-country

sources, for all ongoing national VR systems (for example, the USA National Vital Statistics System) we cataloged all data sources from each system where possible.

Some countries that do not have well-performing VR systems implement sample registration systems that are incomplete by design. We made use of these data, paying close attention to the proper weighting of sampled data and consistency with other representative sources. We have systematically extracted data from the Sample Registration System Statistical Report series published by the Registrar General of India. For the Disease Surveillance Points (DSP) system of China, we obtained both national and provincial level DSP data through a data usage agreement with the Chinese Center for Disease Control and Prevention. Census data were systematically extracted from Demographic Yearbook series, Integrated Public Use Microdata Series (IPUMS), and statistical reports from the national statistical bureaus. Appendix Figure 2 shows more detail of percent of completeness of under 5 registered deaths from 1990 to 2017.

### *Under-5 populations and live births*

For GBD 2017, live births were produced as part of the population and fertility estimation.<sup>1</sup>

### *CBH microdata*

Complete birth histories (CBHs), the preferred method for data collection on child mortality in the absence of VR, rely on administering surveys to mothers. The questionnaires ask about all living and deceased children, including date of birth, survival status, and date of death. These modules were included in many routine survey series, including the World Fertility Surveys (WFS), Demographic and Health Surveys (DHS), Multiple Indicator Cluster Surveys (MICS), and many national survey programs. When available, we downloaded and used microdata that included individual-level survey responses as opposed to tabulated results.

### *CBH tabulated data*

In some instances, tabulated records from reports became available before survey microdata, and we incorporated those data points into our database of 5q0 data as well. However, as microdata became available, we updated with point estimates from our processed microdata rather than the tabulated report estimates.

### *SBH microdata*

Summary birth history (SBH) questionnaires are a shorter alternative to complete birth histories. Instead of asking in detail about each child, summary birth histories simply ask mothers how many children they have given birth to and how many of the children have died. The questionnaires are shorter and can be more easily attached to other surveys. Often, censuses and MICS surveys contain summary birth histories. For GBD, we compiled all available SBH data with microdata, which enabled us to apply the updated SBH method to produce a more accurate and timely assessment of U5MR.<sup>2</sup>

### *SBH tabulated data*

In cases where we did not have access to the microdata on SBH modules from surveys and censuses, we utilized the reported estimates of U5MR from survey or census reports and outliered the first two data points based on mothers aged 15-19 and 20-24.

### *Under-5 age-sex patterns from VR/SRS/DSP*

VR systems were the primary source of data for the under-5 age pattern of mortality in high-income countries. Often, these data were classified into several age groups: early neonatal (0-6 days), late neonatal (7-27 days), post-neonatal (28-364 days), and 1 to 4 years. Some country-years of data had other age groupings with less specificity, with the early and late neonatal age groups combined, or all of the under-1 age groups combined. Sample Registration Systems (SRS) also provided data for the age-sex patterns of under-5 mortality in several countries (notably India and Bangladesh). The DSP system in China provided data on age-sex under-5 mortality as well.

### *Under-5 age-sex patterns from CBH*

In many countries without VR systems, CBH surveys were used to obtain age-sex patterns of mortality in under-5 age groups. These sources are described above in the “CBH microdata” section. For all CBH microdata sources, we applied direct estimation methods to obtain probabilities of death for each of the under-5 age groups. Within each survey, where each observation is a child recalled by a mother, observations were grouped into 5-year groups in time to provide a data point of probability of death for each of the under-5 age-sex groups. Recall was cut off 15 years before the survey, limiting data points estimated from the survey to the 15 years prior. All of these estimates were then put in the database of estimates for the age-sex pattern of under-5 mortality.

### **Section 2.2.2: VR prioritization**

Our continual evaluation of VR data sources led us to develop a general hierarchy of preferred VR sources. When considering which of multiple sources to use for a given location-year, we preferred to first use WHO data from GBD cause-specific mortality estimation, then unadjusted WHO data, then Human Mortality Database (HMD) data, then UN Demographic Yearbook data. There were exceptions to this hierarchy where we had reason to believe that there were quality issues with a certain source. For instance, where available we preferred to use HMD VR over WHO data for Germany, Taiwan, and Spain due to WHO data producing mortality rates that were inconsistent with previously established trends. Single-country VR sources were evaluated based on consistency with other data sources and also VR system documentation.

### **Section 2.2.3: Identify VR under-enumeration for bias correction**

The approach to estimating the completeness of VR systems for deaths under age 5 was the same as that of the previous three GBD studies. However, the VR-specific correction in previous GBD rounds has

been removed for GBD 2017. Most biased VR is corrected in the mixed effects non-linear model outline in Section 2.2.6.

Similar to previous GBD rounds, there were countries for which only VR data were available and the VR systems were considered biased. This was a problem particularly in English-speaking Caribbean countries, so for these countries we adjusted 5q0 estimates from VR using the regional average VR bias in a given year for those countries with both VR and survey 5q0 estimates. The countries for which VR systems were adjusted using this method include Antigua and Barbuda, Bahamas, Barbados, Bermuda, Dominica, Grenada, Saint Lucia, and Saint Vincent and the Grenadines. While there was no direct evidence on the level of VR bias in these countries, assuming they were complete when similar countries in the region exhibited under-registration seemed unwarranted.

#### Section 2.2.4: Biennial 5q0 estimates

##### *Computation of CBH 5q0*

Microdata (individual-level survey data) from CBH yielded direct calculation of death numbers and probabilities of death in the under-5 age group. Observations were grouped into two-year intervals such that biennial estimates of 5q0 were obtained from these survey data. In GBD 2017, we unpooled surveys for our analysis, whereas surveys were pooled by series in GBD 2013.<sup>3</sup> Instead of grouping observations from all DHS complete birth history questionnaires from a country into one full set of observations and all MICS observations from multiple survey years into another full set of observations, we analyzed each survey separately by location (e.g., DHS 2012, DHS 1996, MICS 2002). This allowed for a greater ability to address known data quality issues in specific surveys. To compensate for the decreased sample size and to generate greater stability in the unpooled data points, we created two-year estimates of under-5 mortality, pooling observations over two-year periods instead of single years. We restrict the years of recalled CBH data to two-year intervals with over 10,000 person-months of data as generated by months contributed by each child.

##### *Processing of tabular CBH*

In some instances, microdata from surveys were not available. If survey reports could be obtained but the microdata were not available for us to do our own calculations to obtain 5q0, we used report data point estimates. These estimates were added directly to the under-5 mortality database.

#### Section 2.2.5: SBH time series method

##### *SBH method from microdata*

Rajaratnam and colleagues developed an updated SBH method that was able to provide more accurate and timely estimates of U5MR from microdata on SBH from surveys and censuses.<sup>2</sup>



### *Analysis of SBH from tabular data*

When only tabular data were available for the numbers of children ever born and number of children that have died by mother's age, we applied the Maternal Age Cohort model from the method developed by Rajaratnam and colleagues.<sup>2</sup>

### *Section 2.2.6: 5q0 data synthesis, model running, and bias correction*

#### *Data synthesis using ST-GPR and bias correction*

We applied the child mortality estimation methodology as reported by Wang and colleagues.<sup>3</sup> Based on the under-5 mortality data synthesis model for the Global Burden of Disease Study 2010,<sup>4,5</sup> 2013,<sup>3</sup> 2015,<sup>6</sup> and 2016,<sup>7</sup> we incorporated data bias adjustment into the modeling process. Specifically, we included a fixed effect for source type across all locations to detect systematic differences in the level of child mortality, controlling for covariates for one source type versus another. The groups of sources used to make this adjustment are listed below. In addition, we included a random effect for each country-source. By choosing a reference source (country-by-country or using the mean of a set of sources, we adjusted on a country-by-country basis for the problem of compositional bias created by substantial source-specific non-sampling error. Reference sources were not adjusted, even if multiple sources were used as reference. Once the systematic difference in sources were removed, we were able to avoid estimating false trends due to partial overlap of sources with different levels of non-sampling variance. We then applied the combination of non-linear mixed effects model, spatiotemporal regression, and GPR to synthesize raw child mortality data after data bias adjustment to obtain consistent time series estimates of mortality with 95% uncertainty intervals for every country.

#### *Source types used in child mortality bias correction*

Data source type:

1. CBH - Demographic and Health Survey
2. CBH – AIDS Indicator Survey and Malaria Indicator Survey
3. CBH – World Fertility Survey
4. CBH – Multiple Indicator Cluster Survey
5. CBH – Census
6. CBH – Other survey series
7. SBH – Demographic and Health Survey
8. SBH – Multiple Indicator Cluster Survey
9. SBH – Other survey series

10. SBH – AIDS Indicator Survey and Malaria Indicator Survey
11. SBH – Census
12. SBH – World Fertility Survey
13. VR/Sample Registration/Surveillance - complete
14. VR/Sample Registration/Surveillance – incomplete
15. Household Death Recall – Other survey series
16. Household Death Recall – Census
17. Household Death Recall - incomplete VR/Sample Registration/Surveillance

A list of under-5 mortality reference sources is provided in Appendix Table 5.

*Mixed effect non-linear model and the bias adjustment for raw U5MR sources*

In this stage, we used a non-linear mixed effects regression to estimate data bias and provide first stage predictions.

The nonlinear mixed effects regression model is

$${}_5m_{0cys} = \exp[(\beta_1 + \gamma_{1c}) * \log(LDI_{cy}) + (\beta_2 + \gamma_{2c}) * education_{cy} + \gamma_c + \gamma_{cs} + \alpha_t] + \beta_3 * HIV_{cy} + \varepsilon_{cys}$$

Where

$c$  is country

$y$  is year

$s$  is source

$t$  is source type

${}_5m_0$  is under-5 mortality rate

$LDI$  is lag-distributed income per capita

$education$  is mean years of education for women of reproductive age (15-49 years)

$HIV$  is death rate due to HIV in age groups 0-4

$\gamma$  is a random effect

$\alpha$  is a fixed effect on source type across countries

$\beta_i$  is a fixed covariate coefficient

$\varepsilon$  is the residual

Each source was categorized into one of the 17 source types across all countries. LDI and education covariate estimation is explained in Section 5 of this appendix. The HIV death rates used in this regression are the GBD 2017 HIV estimates (Section 2.5).

For each country, we relied on expert opinion to choose a source, or combination of sources, which were believed to be the least biased. If a country had a VR system which we deemed to be complete (described in detail in 2.2.1), this was the reference source. If a country did not have a complete VR system, but had DHS estimates from CBHs, these were used as the reference source. If a country had neither of these types of data, or DHS estimates were deemed unreliable, we assigned the surveys conducted after 1950 (in combination) as the reference. Incomplete VR data were not included. Additionally, in many countries we chose alternate surveys as the reference. For accurate estimation, it was important to have local knowledge on specific data sources' accuracy. All-cause mortality experts drew from their familiarity with data quality to help us to choose the reference category.

Each data source had an associated random effect as well as a source type fixed effect. The values of these random and fixed effects for the reference sources were deemed to be the true deviation from unbiased mortality level. In countries with multiple high-quality sources, the mean of the random and fixed effects from these sources was taken as this true deviation. We adjusted all other sources by including these reference values for the random and fixed effects values instead of those estimated for each individual source.

$$adjusted_5m_{0,cys} = \exp[(\beta_1 + \gamma_{1c}) * \log(LDI_{cy}) + (\beta_2 + \gamma_{2c}) * education_{cy} + \gamma_c + \gamma_{ref,c} + \alpha_{ref,c}] + (\beta_3 + \gamma_{3c}) * HIV_{cy} + \varepsilon_{cys}$$

The exception to this correction was incomplete VR data (section 2.2.3), which was adjusted upwards using a five year rolling mean of the difference between incomplete VR and a Loess of the already-adjusted survey data.

### *Spatiotemporal smoothing*

The spatiotemporal stage smooths the residuals between the predicted time series of 5q0 and the adjusted raw data over time and across countries in the same GBD region. The predicted time series for this smoother was obtained from the equation below; no random effects or survey type fixed effects were included.

$$predicted_5m_{0,cy} = \exp[\beta_1 * \log(LDI_{cy}) + \beta_2 * education_{cy} + \alpha_{intercept}] + \beta_3 * HIV_{cy}$$

We first found the residuals between the predicted time series, above, and the adjusted points. We then applied a combination of smoothing functions to these residuals. For each country-year, we weighted all

the data points in this region based on their proximity to this country-year in space and time. We gave 99% of the weight to in-country residuals, and 1% of the weight to out-of-country residuals. Additionally, we used a modified tricubic window, as specified below, to give more weight to points closer in time, and less weight to points further in time.

$$w_t = \left( 1 - \left( \frac{|r_t - r_{est}|}{1 + \text{argmax}_t |r_t - r_{est}|} \right)^\lambda \right)^3$$

Where

$r_t$  is the year of interest

$r_{est}$  is the year of the residual being weighted

$\text{argmax}_t |r_t - r_{est}|$  is the maximum distance between the year of interest and a residual within the region

$\lambda$  is the weighting function that dictates how quickly the weights fall off as the distance in time increases

A larger  $\lambda$  implies that the assigned weights will diminish slowly with time, while a smaller  $\lambda$  allows the weights to diminish more rapidly with time.  $\lambda$  values were chosen using the parameter selection process described below. We then created one estimate of the smoothed residuals using a linear fit to this weighted data, similar to a Loess fit. Additionally, we created a second estimate of the smoothed residuals by calculating the weighted average of this data.

We then combined these two estimates for a final estimate of the smoothed residuals. In data-dense countries, more weight was given to the local linear fit; in data sparse countries, more weight was given to the weighted average. The equation for this is as follows.

$$\text{final smoothed residual} = k * \text{linear estimate} + (1 - k) * \text{weighted average}$$

Where

$$k = \frac{\text{number of in country data points}}{\text{number of in country data points} + \text{number of country years with no data}}$$

Finally, the smoothed residuals were added back to the predictions from above; this smoothed approximation to the adjusted data was used as the prior for GPR, described below.

## GPR

The output of the space-time smoothing step was used as a prior for GPR, which produced a final time series of point estimates, as well as confidence bounds. Parameters for GPR were chosen through cross-validation as described below.

The model for GPR was

$$\mu_t = f(t) + S_t$$

$$f(t) \sim GP(M, C)$$

Where

$\mu_t$  is the true  $\log_{10}(5q_0)$  at time  $t$

$f(t)$  is the baseline mortality risk

$S_t$  is excess mortality due to fatal discontinuities estimated independently of  $f(t)$

$M$  is the mean for the Gaussian process

$C$  is the covariance for the Gaussian process

We specified a prior distribution for  $f(t)$  from the spatiotemporal regression, and a likelihood function that describes the data generation process; the specified prior distributions and likelihood function are described below. We then used Markov Chain Monte Carlo (MCMC)<sup>8</sup> to approximate the posterior distribution of  $f(t)$ , which also incorporated information from the observed empirical estimates of adult mortality. An MCMC chain of length 5,000 was produced; the first 3,000 samples were discarded and the remaining 2000 were thinned by a factor of 2 for a total of 1,000 simulations retained. The reported best estimates and uncertainty intervals were generated from the mean and the 2.5<sup>th</sup> and 97.5<sup>th</sup> percentiles of the 1,000 samples, respectively.

The prior distribution of  $f(t)$  can be described in terms of the mean prior—the prior for  $M$ —and the covariance prior—the prior for  $C$ . We utilized the second stage predictions as the mean prior and used a Matern covariance function to describe the covariance prior. The parameters of the Matern covariance function were selected through cross-validation and were location-specific.

### *Likelihood*

The likelihood describes the probability of observing the data given a particular set of parameters. As shown in the equation below, we used a normal model for describing the probability of observing a particular value of  $\log(5q_0)$

$$\log_{10}(5q_{0_t}) \sim Normal(f(t), V_t)$$

Where

$f(t)$  is the mean

$V_t$  is the data variance

Data variance was calculated for each empirical observation of 5q0 and incorporated both sampling and non-sampling variation. The method for calculating the data variance depended on the type of data:

1. For estimates derived from complete VR data, we assumed that there was no non-sampling variance and included only sampling variance as computed from a binomial model. We set  $N$  equal to the national population aged 0 to 5 years and  $p$  equal to the mortality rate,  ${}_5m_0$ . We calculated the variance of  ${}_5m_0$  from  $p(1 - p)/N$  and then transformed this to the variance of  $\log_{10}(5q0)$  using the delta method.<sup>9</sup>
2. For estimates derived from incomplete VR data, we wanted to include not only sampling variance but also the non-sampling variance that arises from uncertainty in the completeness estimate. For these data, the total data variance was given by the sum of the sampling variance (calculated as for complete VR data) and the variance of the completeness estimate;
3. For estimates derived from CBHs, we generated 1,000 simulations of 5q0, converted these estimates into  $\log_{10}$  space, and calculated the sampling variance from these 1,000 simulations;
4. For estimates derived from SBHs we used the standard error from the mean residuals;
5. For estimates not covered under the above four calculations, the missing data variance was determined as the maximum standard error from non-VR points in the country. If the data variance was still missing it was calculated as the maximum standard error from non-VR data in the GBD region.
6. For each source type we calculated the within-source-type variance of the source-specific random effect. This additional non-sampling variance was then converted to  $\log_{10}$  space and added to the variance as calculated above for all data points not classified as complete VR.

### *Hyperparameter selection for under-5 mortality rate ST-GPR*

For GBD 2017, hyperparameters were selected based on a newly-created data density score for a given location. The data density score was calculated for each location based on the number of deaths from VR sources as well as the number of unique CBH and SBH available. The data density score was computed using the following steps:

1. Calculate complete VR score: this component of data density was computed based on the number of deaths from an unbiased VR sources in the location. Using the death counts, we capped the number of deaths at 500 for each year and then divided that number by 500. The result was a score for each year between 0 and 1 where 1 represents a complete VR system with at least 500 registered deaths. To get the final complete VR score for a location, we added up

the score for each year across the full time series. The result was a complete VR score between 0 and 68 (the range of our full 1950-2017 estimation time series).

2. Calculate incomplete VR score: this component of data density is computed in the same manner as the complete VR score using biased VR instead of unbiased VR.
3. Total CBH sources: this is simply a count of the unique complete birth histories for a location
4. Total SBH sources this is simply a count of the unique summary birth histories for a location
5. Once the intermediate calculations were completed, the following formula was used to compute the final data density

$$data\_density = complete\_vr\_deaths' + (0.5 \times incomplete\_vr\_deaths) + (2 \times cbh\_sources) + (0.25 * sbh\_sources)$$

Once the data density for a location was calculated, we assigned hyperparameters:

*Table A*

| Data Density | Zeta | Lambda | Scale |
|--------------|------|--------|-------|
| 0 to 9       | 0.7  | 0.7    | 15    |
| 10 to 19     | 0.7  | 0.5    | 15    |
| 20 to 29     | 0.8  | 0.4    | 15    |
| 30 to 49     | 0.9  | 0.3    | 10    |
| 50 plus      | 0.99 | 0.2    | 5     |

### Section 2.2.7: Identify and remove outliers

There were several important quality-control steps in reviewing child mortality data and estimates. First, data points from years in which fatal discontinuities occurred were outliered, unless they were VR data points with sufficient information that the fatal discontinuities could simply be subtracted out of the VR data. The intent was to capture the underlying mortality risk rather than large stochastic variations. These fatal discontinuities were then added on in a later step (see Section 2.6.3). Secondly, we outliered data sources with quality concerns such as the Afghanistan DHS from 2010. Our extensive collaborator network allowed for review of sources, and collaborators raised concerns over known issues with data sources about which they had expert knowledge.

### Section 2.2.8: Rake subnational estimates to national level (excluding South Africa)

The estimation process for 5q0 does not enforce consistency between subnational estimates and national estimates. To ensure consistency throughout the GBD hierarchy, we rescaled the subnational estimates to the national level via population-weighting to calculate an implied national estimate from the subnational estimates. This created a scalar of the national-level estimate from GPR to the aggregated subnational estimates, which was then multiplied by all of the subnational estimates to obtain the scaled estimates. In most cases, we considered national-level estimates to be more reliable, so we chose this strategy of subnational scaling. In locations with high-quality VR data, this scaling has a

minimal effect, but the effect can be greater in locations with more subnational units and variable-quality data.

In South Africa, it was essential that the province-specific mortality patterns be consistent with HIV models, since such a large part of the trend was driven by deaths due to HIV/AIDS. In this case, instead of scaling provincial-level estimates to national-level GPR estimates, we aggregated province-level GPR estimates to generate the national-level estimates.

### Section 2.2.9: Review estimates for quality

Estimates of 5q0 from the ST-GPR process were reviewed in comparison to UNICEF estimates from their 2015 revision and GBD 2015 results.<sup>10</sup> Any differences were traced to either changes in available data or changes induced by changes in hyperparameters or input covariates. Revisions were made through this review process and through expert consultation with the GBD mortality collaborator network.

### Section 2.2.10: U5MR with HIV

The 5q0 ST-GPR process generated U5MR for all GBD 2017 locations that was inclusive of the impact of all causes of death excluding fatal discontinuities, which were added in a separate step (see section 2.6.3).

### Section 2.2.11: Under-5 age and sex pattern model estimation

The process used to break down under-5 mortality into age- and sex- specific groups has been previously described.<sup>7</sup> The current process was largely similar but was modified to improve the accuracy of predictions for countries affected by HIV/AIDS. As pointed out by Bradshaw et al.,<sup>11</sup> neonatal mortality tends to be overestimated if the all-cause U5MR is used as the only predictor. We used a multi-stage modeling process to generate sex-specific estimates of early neonatal (days 0 to 6), late neonatal (days 7 to 27), post-neonatal (the remainder of the first year), under-1, and childhood (ages 1 to 4) mortality. First, the ratio of male to female 5q0 was estimated, then age- and sex-specific mortality estimates were generated using this ratio. To fit models to obtain estimates data from VR, sample VR, and CBHs were converted to mortality risks for specific age groups. Sources had differing levels of age specificity and at minimum included infant (composed of early neonatal, late neonatal, and post-neonatal) and child mortality, but could include all 4 smaller age groups. The sex-specific model was fit to the data, followed by the age-specific model.

The sex model first predicted the ratio of male 5q0 to female 5q0 in rescaled logit space for each country  $i$  in region  $j$  in year  $t$ . The data were ordered by observed 5q0, and categorized into 20 evenly sized bins. We rescaled the ratio data between 0 and 1 to between 0.8 and 1.5. Then the model was fit to the data as described in the equation below.

$$\text{logit} \left( \frac{\text{Male } 5q_0}{\text{Female } 5q_0} \right)_{jit} = \beta + \gamma_{5q_0 \text{ bin}} + \gamma_j + \gamma_i + \varepsilon_{jit}$$



The ratio was predicted by nested location and region random effects  $\gamma_i$  and  $\gamma_j$ , a random effect on the 5q0 bin, and an intercept term,  $\beta$ . A Loess regression was then used to smooth the estimated  $\gamma_{5q0 \text{ bin}}$  on 5q0, creating a continuous  $\gamma'_{5q0 \text{ bin}}$ . Then, the equation below was used to predict the ratio of male to female 5q0:

$$\text{logit} \left( \frac{\text{Male}_{5q0}}{\text{Female}_{5q0}} \right)_{jit} = \hat{\beta} + \gamma'_{5q0 \text{ bin}}(5q0_{jit}) + \hat{\gamma}_j + \hat{\gamma}_i$$

The predicted ratios were unscaled, inverse logited, and used as the first stage prediction for ST-GPR as used for the estimation of U5MR. ST-GPR hyperparameters were chosen using the same method outlined of U5MR in section 2.2.6. The male and female 5q0 values were found using the system of equations that includes the prediction from the ST-GPR described above and the equation below, where  $r_{birth}$  is the sex-ratio at birth.

$$5q0 = \left( \frac{1}{1 + r_{birth}} \right) * (\text{female}_{5q0}) + \left( \frac{r_{birth}}{1 + r_{birth}} \right) * (\text{male}_{5q0})$$

Age-specific models were then fit for each age group on sex-specific data. A separate model was fit for each age group, yielding five models for each sex: early neonatal, late neonatal, postneonatal, infant, and child. The log of the probability that an under-5 death occurs in a given age group conditioned on surviving to that age group was modeled instead of the mortality risk, simplifying the scaling process and restricting risks to be between 0 and 1. Because evidence suggests HIV has differential effects on different under-5 age groups,<sup>12,13</sup> the crude death rates from HIV/AIDS in the under-5 age group were included in the model for age groups after neonatal, given our assumption that all HIV deaths that occur in the first year of a child's life occur in the post-neonatal stage (after 28 days). The literature on HIV in these age groups is still unclear, but seems to indicate higher mortality in the post-neonatal stage. There is no clear evidence to guide alternative methods of age-splitting under-1 deaths due to HIV.<sup>13,14</sup> We used the crude death rate due to HIV from the GBD 2017 model (see Section 2.2.6). The inclusion of this covariate improves both the fit and prediction of the model in countries with high HIV prevalence. We included the maternal education covariate that is also used in the 5q0 first-stage model and the completeness of the source-specific 5q0 estimate for the data-point used in the regression for that 1 to 4 age group only. This completeness measure was calculated by taking the source-specific 5q0 point estimate and dividing by the final 5q0 estimate from GPR. The functional forms of the model are below, where age  $y$  included late-neonatal, post-neonatal, and under-1 children.

$$\log(\text{Pr}(\text{death at age } enn | u5 \text{ death})_{jit}) = \beta_1 + \gamma_{5q0 \text{ bin}} + \gamma_j + \gamma_i + \varepsilon_{jit}$$

$$\log(\text{Pr}(\text{death at age } y | u5 \text{ death})_{jit}) = \beta_1 + \beta_2 * HIV_{it} + \gamma_{5q0 \text{ bin}} + \gamma_j + \gamma_i + \varepsilon_{jit}$$

$$\log(\text{Pr}(\text{death in age } 1 - 4 | u5 \text{ death})_{jit}) = \beta_1 + \beta_2 * HIV_{it} + \beta_3 * Mat.Ed_{.it} + \beta_4 * Completeness_{sit} + \gamma_{5q0 \text{ bin}} + \gamma_j + \gamma_i + \varepsilon_{jit}$$

Similar to the sex model, the sex-specific age prediction used 5q0 bins and smoothed the random effect on the bin using 5q0. The prediction equation for the age group 1 to 4 is shown below.

$$\log(\text{Pr}(\text{death in age } 1 - 4 | \text{u5 death})_{jit}) = \hat{\beta}_1 + \hat{\beta}_2 * \text{HIV}_{it} + \hat{\beta}_3 * \text{Mat. Ed.}_{it} + \hat{\beta}_4 * 1 + \hat{\gamma}'_{5q0 \text{ bin}(5q0_{jit})} + \hat{\gamma}_j + \hat{\gamma}_i$$

Where

$y$  is age

$j$  is region

$t$  is time

$\hat{\gamma}_i$  is nested random effects on country

$\hat{\gamma}_j$  is nested random effects on region

$\hat{\beta}_1$  is an intercept term

$\hat{\gamma}'_{5q0 \text{ bin}(5q0_{jit})}$  is a smoothed random effect on 5q0 bin

$\hat{\beta}_2$  is a coefficient on the under-5 crude death rate from HIV

$\hat{\beta}_3$  is a coefficient on maternal education

$\hat{\beta}_4$  is a coefficient on completeness

Note that for prediction, the completeness coefficient was multiplied by 1 instead of a source-specific completeness, as we sought to predict based on a hypothetically complete source. Similar to the sex-ratio model discussed above, these predictions were used as the first stage prediction for ST-GPR that produced sex and age specific probabilities of death.

Once each of these predictions was made by age group, they were rescaled such that the probabilities of death in the early neonatal, late neonatal, post-neonatal, and 1 to 4-year age groups aggregated to the 5q0 estimates from the under-5 model.

### Section 2.2.12: Identify and remove outliers

There were several criteria for removing outliers for the under-5 age-sex pattern model. For the sex model, non-VR (survey) data points from high-quality VR locations (as determined by the GBD VR quality rating system) were outliered to ensure the model followed the highest quality data. Additionally, un-outliered sex ratio data were adjusted to be between 0.8 and 1.5.

For the age model, the following outliering criteria were used:

VR data that were considered incomplete were marked as outliers. To be considered incomplete, the 9-year rolling average of the VR data 5q0 value was compared to the 9-year rolling average of the 5q0 estimates. Then, for a given data-year, the value of 5q0 in the raw

data was compared to our final 5q0 estimate. A value of 85% was considered incomplete and outliered, unless the ratio of the 9-year rolling average was above 85% complete.

Any data that were chosen as outliers as part of the 5q0 analysis were also marked as outliers in the age pattern analysis.

If a country has both VR and CBH data, they were typically both used. If there was a conflict between the two, VR data were used.

CBH data points more than 15 years prior to the survey were outliered.

Some data points were manually outliered. For example, the definition of live birth changed in some Eastern European countries in the 1990s, leading to inconsistencies. In this case, age group data in ages that would include childbirth deaths (early neonatal, neonatal, and ages 1-4) were outliered if the definition of live birth contains a minimum weight, as it did in some of these locations.

### Section 2.2.13: Under-5 age-sex splitting model application

The prediction method from the age-specific model is described above in section 2.2.11. First, the results of the sex model were applied, yielding sex-specific 5q0 estimates. Once age-sex-specific predictions of the log conditional probability of death were made, these were exponentiated and rescaled so that they sum to 1. First, the under-1 and 1-4 conditional probabilities were scaled to add to 1. Then, the early neonatal, late neonatal, and post-neonatal conditional probabilities were scaled to the under-1 conditional probability. Then, the probabilities of death were calculated so that they properly aggregated to the final 5q0 prediction. For example, to calculate the probability of death in the early neonatal age group, the rescaled conditional probability of early neonatal death given under-5 death was multiplied by the probability of under-5 death. Then, to obtain the probability of death in the late neonatal age group, the rescaled conditional probability of death in the late neonatal age group given under-5 death was multiplied by the probability of under-5 death and then divided by the probability of survival to the beginning of the age group, and so on. Equations below represent this process, where *enn* represents early neonatal and *lnn* represents late neonatal.

$$q_{enn} = \Pr(\text{death in } enn \mid u5 \text{ death}) * 5q0$$

$$q_{lnn} = \Pr(\text{death in } lnn \mid u5 \text{ death}) * 5q0 / (1 - q_{enn})$$

The older age groups were also calculated in this manner, yielding probabilities of death in each of the under-5 age-sex groups.

## Section 2.2.14: Under-5 death number estimation

### *Assigning under-5 deaths to GBD age-sex groups*

To estimate the number of under-5 deaths, we ran an estimation process that aged birth cohorts through our estimated probabilities of death. This process separated our yearly birth numbers for each location into week-sized cohorts and aged each of these cohorts through our mortality estimates in week-long steps to estimate the number of person-years and deaths in each of the early neonatal, late neonatal, post neonatal, and 1-4 years age groups.

## Section 2.3: Adult mortality

### Section 2.3.1: Data sources

#### *Adult population estimates*

To calculate adult mortality rate using household death recall, age specific populations in age group 15 to 59 from the corresponding survey or census sources were used. This is also true in calculating adult mortality rate using reported deaths from Sample Registration System from India and Disease Surveillance Point system from China. For data from VR systems, we used estimates from the GBD population model.

#### *VR/SRS/DSP*

See section 2.2.1 descriptions of VR sources for information on how VR, SRS, and DSP data were identified and prioritized.

#### *Household recall of deaths*

Household recall was ascertained via large survey series such as the Malawi 2010 DHS. A survey series was required to include a module asking about the number of deaths of household members within a given recall time period, along with a list of household members who have not died over this period of time. In addition, these survey series were required to be nationally representative, include survey weights (if applicable), and detail the sex and age (either current or at death) of all household members.

#### *Sibling survival histories*

Data for sibling survival histories were primarily taken from large survey series in which respondents were asked about the status of their siblings, alive and dead. Examples of sibling survival history sources included the Laos 2011-12 Multiple Indicator Cluster Survey and many DHS sources. To generate estimates of sibling survival, each questionnaire must have contained a module with a full accounting of all siblings (children born to the same mother) of all respondents, along with data on the year of death (if applicable), sex, age at death, and year of birth.

### Section 2.3.2: Completeness Assessment: Death Distribution Methods and completeness estimates synthesis

VR systems may not capture all adult deaths. It was important to assess the completeness (quality) of available VR data. Demographers have long applied a suite of death distribution methods (DDMs) including generalized growth balance (GGB), synthetic extinct generation (SEG), and a combined approach (GGBSEG) to assess completeness.<sup>15–19</sup> These methods compare the age distribution of the population recorded in two censuses with the age distribution of deaths recorded between these two censuses and attempt to estimate completeness of VR.

Recent modifications of these DDM methods provide estimates of completeness that, based on careful simulation studies, were more accurate and robust than traditional methods. Nevertheless, these methods generate completeness estimates with substantial uncertainty intervals.<sup>20</sup>

For this GBD study, the process for estimating completeness of death registration for adults was based on estimates of adult completeness from three death distribution methods, as well as information about child completeness.<sup>20</sup> These two sources of information were combined to generate a series of estimates of source- and country-specific adult death registration completeness from 1950 to 2017 (Appendix Figure 2). The underlying assumption of this process was that completeness of systems changes gradually; consequently, assessments of completeness for a given year were informed by DDM estimates for prior and future years in that country. Completeness was likely to be similar among countries within a region, so we informed estimates of completeness with levels of completeness estimated for countries in the same region or super-region by borrowing strength over space as well as time. To do this, we used a two-stage model, whereby we first predicted adult completeness based on child completeness and then used a spatial-temporal regression model to incorporate information about adult completeness from the application of DDM methods.

Child completeness was calculated as the ratio of observed child mortality to estimated child mortality for a given source, country, and year. For a particular country-source, estimates of child completeness were only available for years where that data source was present, but a complete time series of child completeness estimates was produced based on a smoothing process. For country sources with no more than three years of data, a constant level of child completeness at the level of the mean of those years that were available was assumed. For country sources with more than three years of data, Loess regression was used to fill in the time series. In order to be conservative in our out-of-sample estimates of child completeness, instead of using the Loess predictions to forecast and backcast we simply held child completeness constant before the first observation and after the last observation. When there was a gap of more than five years we linearly interpolated between the observations on either side of this gap instead of using the Loess predictions to fill in these years.

For VR, SRS, and DSP sources, we treated completeness values at 95% or higher for a given country-year combination as 100% complete. In doing so, we scaled completeness values between 90% and 95% to account for this assumption. For a given country-source combination, if a country was complete across the full time-series, we assumed its subnational locations were fully complete as well. We made an

exception to this rule for Brazil. While we found the fully complete time-series to be accurate at the national level, there were differential completeness values across its subnational locations. Including this variation was necessary in order to accurately compute life expectancy at the subnational level.

### Section 2.3.3: Sibling survival method

In countries where sources including VR and household death recall were scarce, sibling histories provided important information on the levels and trends of adult mortality rates. However, as studies have shown<sup>21</sup>, estimates of adult mortality rate using sibling survival modules had significant biases resulting from the design and implementation of the method. Specifically, there were four different types of biases:

1. Selection bias (under representation of siblings from high mortality sibships)
2. Zero reporter bias (sibships not represented in the survey due to sex composition and/or mortality level of a sibship)
3. Sparse data
4. Recall bias (generally under reporting of death of siblings living in different places or have died in the distant past)

The sibling survival technique we employed was based on the work by Obermeyer et al.<sup>21</sup> with a few key differences to their methods:

1. Use of appropriate survival weights that accounted for the study design
2. Implementation of a correction to account for the mortality experience of families not represented because none of the siblings were alive and eligible to respond to the survey
3. Refinements for adjusting for recall bias.

We validated these methodological developments in a range of simulation environments and adjusted for recall bias and sparse data in survey designs where the age range of the respondents was narrower than the age range desired for estimation.<sup>21</sup>

Sibships with higher rates of mortality were less likely to be represented in the survey because fewer of them were likely to have survived to be selected into the sample. A method to correct for this underrepresentation, proposed by Gakidou and King,<sup>22</sup> incorporates a sibship-level weight:

$$W_j = \frac{B_j}{S_j}$$

Where

$j$  is a given sibship

$B_j$  is the original size of sibship  $j$

$S_j$  is the number of siblings in sibship  $j$  who survive to the time of the survey

When each observation in the dataset being analyzed was at the sibship level, the Gakidou-King (GK) weight could be used to compute a weighted average of the proportions of siblings deceased as reported by each respondent. In the absence of any sibships where all siblings have died, this correction algebraically corrected for the underrepresentation of high-mortality sibships in the survey sample.

When the dataset was expanded to the sibling level (i.e., one observation for each sibling as opposed to sibship), the number of observations listed in the dataset for each sibship corresponded to the original sibship size,  $B_j$ , and so the numerator of  $W_j$  was already accounted for. The resulting sibling-level weight was therefore

$$W_i = \frac{1}{S_j}$$

for sibling  $i$  in sibship  $j$ .<sup>23,24</sup>

Since the analysis reported here was carried out at the sibling level, we used  $W_i$  rather than  $W_j$ . This improved on previous applications of the method, where the sibship-level weight was inappropriately applied to data that had been expanded to the sibling level.

Further, the number of surviving siblings in the family must also be tailored to the eligibility criteria for respondents of the given survey.<sup>23</sup> In applying Gakidou and King's elucidation of the survivorship correction,  $\frac{S_j}{B_j}$  represented the probability that a sibling in sibship  $j$  survived and was eligible to be selected in the survey. For DHSs, respondents must be women between the ages of 15 and 49 and so the  $S_j$  represented the number of surviving women in a sibship  $j$  who were between the ages of 15 and 49 at the time of the survey. For our analysis, the value of  $S_j$  was chosen to be consistent with the eligibility criteria of each survey.

The sampled population excluded sibships in which there were not any eligible siblings to respond to the surveys. Thus, we cannot report on the mortality experiences of these siblings. The zero-survivor correction estimated the number of sibling deaths that were missing from the sample by age and sibship size, and then added these siblings to the observed sample before calculating age-specific mortality rates. This correction was applied to sibships with one or two females. The correction used the relationship between the true number of sibships with one (or two) females and the cumulative probability of dying before the time of the survey to estimate the number of missing sibling deaths. For one-sibling sibships

$$K_{obs}^1 = K_{true}^1 * (1 - aq_0^1)$$

$$K_{miss}^1 = K_{true}^1 * aq_0^1$$

Where

$K_{obs}^1$  is the number of sibships with one sister that were observed in the sampled population

$K_{true}^1$  is the true number of sibships with one sister in the population

$K_{miss}^1$  is the number of sibships with one sister that were not represented in the sampled population due to zero-survivor bias

${}_a q_0^1$  is the cumulative probability of death for five-year age-group  $a$

$(1 - {}_a q_0^1)$  is the probability that the sister has survived to the time of the survey

From these two equations, it followed that the number of sibships with only one sister that were not represented in the population due to zero-survivor bias was equal to:

$$K_{miss}^1 = \frac{K_{obs}^1}{1 - {}_a q_0^1} \times {}_a q_0^1$$

We multiplied this estimate of the number of missing sibships by the number of females in the sibship (which in this case is one) to produce an estimate of the number of females in each age group that were missing from the sample because they had died. We then expanded this number so that there was one observation per missing sibling, assigned birth and death dates to these missing siblings based on the distribution in the observed siblings, and appended them to our existing dataset. This process was also carried out for families with two sisters:

$$K_{obs}^2 = K_{true}^2 * (1 - {}_a q_0^1 * {}_a q_0^2)$$

$$K_{miss}^2 = K_{true}^2 * {}_a q_0^1 * {}_a q_0^2$$

$$\therefore K_{miss}^2 = \frac{K_{obs}^2}{1 - {}_a q_0^1 * {}_a q_0^2} * {}_a q_0^1 * {}_a q_0^2$$

Where

$K_{obs}^2$  is the number of sibships with two sisters that were observed in the sampled population

$K_{true}^2$  is the true number of sibships with two sisters in the population

$K_{miss}^2$  is the number of sibships with two sisters that were not represented in the sampled population due to zero-survivor bias

${}_a q_0^1$  is the cumulative probability of death for the first sister in five-year age-group  $a$

${}_a q_0^2$  is the cumulative probability of death for the second sister in five-year age-group  $a$ .



If there was only one sister within the 15 to 49 age range, the equations were different than above because the second sister did not contribute to the probability of the sibship being observed in the sample.

$$K_{obs}^2 = K_{true}^2 * (1 - aq_0^1)$$

$$K_{miss}^2 = K_{true}^2 * aq_0^1 * aq_0^2 + K_{true}^2 * aq_0^1 * (1 - aq_0^2)$$

$$\therefore K_{miss}^2 = \frac{K_{obs}^2}{1 - aq_0^1} * aq_0^1 * aq_0^2 * \frac{K_{obs}^2}{1 - aq_0^1} * aq_0^1 * (1 - aq_0^2)$$

Both this analysis and Obermeyer et al. accounted for time prior to the survey in the logistic regression to model mortality.<sup>21</sup> The GBD analysis, however, utilized an updated method for recall bias adjustment. After 45q15 was estimated for each of the surveys, the estimates were combined and paired up for all periods where they overlapped. This overlap occurred when there were at least two surveys carried out in the same country within 15 years of each other. In GBD 2013, we estimated adult mortality from sibling histories for three five-year periods prior to the survey date. This was changed in GBD 2015 – and continued for GBD 2016 and GBD 2017 – where single-year 45q15 estimates from sibling survival were generated using the same methodology to account for the changing level and trends of 45q15 within the 15-year period covered by sibling survival module. This generated pairs of estimates in years where there were overlapping surveys. For each of these pairs, we calculated the difference in the years of recall as the interval between when the two surveys were conducted. We also calculated the magnitude of the difference between the two estimates of 45q15. We then estimated the linear regression model shown in the below equation to quantify the relationship between years of recall and level of mortality separately for each sex of sibling:

$$\Delta(45q15)_{i,j} = \beta \times \Delta(survey\ date)_{i,j} + \xi$$

Where

$\Delta(45q15)_{i,j}$  is the difference in 45q15

$\Delta(survey\ date)_{i,j}$  is the difference in survey date

$j$  is the survey pair

$i$  is the country

Upper and lower uncertainty intervals were also derived. The coefficient on recall period represented the effect of recall bias and was used to adjust the 45q15 estimates to account for that bias.

### Section 2.3.4: Completeness data synthesis

Once we obtained a full series of under-5 completeness estimates for each country source we fit the model described in the equation:

$$\log_{10}(c_{i,s,t}^{adult}) = \alpha + \beta_1 \times \log_{10}(c_{i,s,t}^{child}) + \gamma_1^{SR} + \gamma_2^{SR} \times \log_{10}(c_{i,s,t}^{child}) + \gamma_1^R + \gamma_2^R * \log_{10}(c_{i,s,t}^{child}) + \eta_{i,s} + \xi_{i,s,t}$$

Where

$i$  is country

$s$  is source

$t$  is time

$R$  is region

$SR$  is super-region

$c_{i,s,t}^{adult}$  is completeness of adult deaths registration

$c_{i,s,t}^{child}$  is completeness of child deaths registration

$\gamma$  terms are random effects

$\eta_{i,s}$  is a random effect at the country and source level

$\xi_{i,s,t}$  is an error term

This model related adult completeness to under-5 completeness and included super-region and region-level random effects to allow for differences in both the average level of adult completeness and the relationship between child and adult completeness at these levels. The country-source random effect captured the fundamental difference in level of completeness between different data sources.

A  $\log_{10}$  transformation was employed to make over- and under-completeness symmetric (e.g., 50% complete and 200% complete were symmetric around 0 when  $\log_{10}$  transformed) and to simplify calculation of the variance of completeness estimates in  $\log_{10}$  space, which was needed for the adult mortality estimation process. To avoid outlying DDM-derived estimates of adult completeness from unduly influencing the predictions from the model in the equation above, for any given set of three DDM estimates (GGB, SEG, GGBSEG) calculated from a single pair of censuses, the estimate that was furthest from 1 (i.e., complete) was excluded.

For each country-source  $\log_{10}(c_{i,s,t}^{adult})$  was predicted from coefficients estimated in the model above and child completeness. Not every country can be used to fit this model, as DDM cannot be applied in some cases due to lack of appropriate census data. However, because the coefficients used for

prediction were at the region and super-region level, predictions from this model could be generated for all countries where estimates of child completeness were available. We did not believe that the same relationship between adult and child completeness existed for registration-based sources as for recall-based sources, so the above model was applied only to registration-based sources (primarily VR data but also sample registration systems). For sources that only included household death recall, we set an arbitrary value of 1 for the first stage values instead of making predictions from completeness from child age groups for the aforementioned reason. However, it should be noted that this set value by no means reflected the true completeness of adult age groups in the household death recall sources and it changed once we applied the spatial-temporal regression.

In the second stage, we calculated the residuals from the first stage and applied spatial-temporal smoothing to these residuals. The predicted residuals were then added back onto the first-stage predictions, generating the second-stage predictions. Spatial-temporal smoothing was carried out in the same way as in the adult mortality estimation process with three modifications:

1. The  $\lambda$  and  $\zeta$  parameters were set to 2.0 and 0.95
2. Only the fixed effect local regression variant was used
3. The residuals were not held constant out of sample.

The registration-based sources and the non-registration-based sources were handled separately in this step.

The variance of the completeness estimates was also calculated, as this information was utilized in the adult mortality estimation process. To do this, we approximated the variance based on the median absolute deviation (MAD) compared to the second-stage estimates. We calculated variances at the regional level, and did so separately for registration-based sources and other sources. Then, for each country-source-year, we generated 10,000 simulations from a normal distribution with mean equal to the second-stage prediction for that year and variance. For non-registration-based sources, we believed that both under- and over-reporting were possible (over-reporting might have occurred due to telescoping of events outside of the recall period into the recall period), and so for these sources we exponentiated the 10,000 simulations and calculated the mean, which served as the final prediction for completeness. For registration-based sources we believed that only underreporting was possible, so for these sources we first truncated any simulations above 1 to 1. We then exponentiated the 10,000 simulations to find the truncated mean, which served as the final prediction for completeness. In both cases, before exponentiating the simulations, the variance of the simulations was calculated and used as the variance of the completeness estimates in the adult mortality estimation process.

The final completeness estimates were used to adjust, where appropriate, the corresponding country-source-years before these data were used in the adult mortality estimation process. For countries in which we believed males and females had differential completeness, Saudi Arabia and Morocco, we carried out the above process separately by sex. For a small number of data points completeness could not be estimated using the procedure described above due to a lack of appropriate census data; the original growth balance method was the only viable option.<sup>12</sup> In previous papers, we included a selected

number of data points derived from household recall of deaths to which the Brass growth balance method had been applied. Our simulation studies suggested this method was extremely imprecise, so we excluded these points from the analysis.

### Section 2.3.5: 45q15 data synthesis using non-linear mixed effects model and ST-GPR

#### *Overview of adult (45q15) mortality estimation*

For each location, we generated a time series of 45q15 estimates. We modeled the underlying mortality risk separately from excess mortality due to fatal discontinuities. To model the underlying mortality risk we relied on a three-stage process that incorporated all data in our database for each country, after excluding data identified as outliers or that referred to years identified to contain mortality shocks from conflict or natural disaster.

1. In the first stage, we applied a nonlinear mixed effects model that used covariates to explain variation in the mortality rate for the group aged 15 to 59 (45m15).
2. In the second stage, we exploited spatial and temporal correlation in the residuals from the first stage regression by performing a smoothing process on these residuals. The smoothed residuals were then added back into the first stage regression predictions to produce an updated time-series of 45q15 for each country.
3. In the third stage, we applied GPR to synthesize information from the second stage predictions and the observed data.

After applying this procedure to generate estimates of the underlying mortality risk, we modeled abrupt changes in mortality by estimating the excess risk of mortality in years identified as containing a conflict or natural disaster. This estimated excess mortality risk was then added to the underlying mortality risk to produce our final time series of 45q15 estimates. A more complete description of the various stages of our modeling strategy is given below.

#### *First stage nonlinear mixed effects regression*

Similar to estimating 5q0, the first stage model for adult mortality is a nonlinear mixed effects regression. We use this regression to generate estimates for adult mortality rates for each location, year, and sex. In addition to the three covariates used in previous GBD rounds, lag-distributed GDP per capita, mean years of education in age group 15 to 59, and crude death rate due to HIV/AIDS in age group 15 to 59, we have added 5q0 estimates which we found improved model fit. Additionally, we added a fixed effect on sex allowing us to fit the model using males and females together as opposed to running separate models in the past. The specific equation used for the nonlinear mixed effects model is specified below.

$${}_{45}m_{15}^{observed} = \exp(\beta_1 + \beta_2 \cdot Edu + \beta_3 \cdot \ln(LDI) + \beta_4 \mu + {}_5q_0 + \alpha_{sex} + \gamma_{country}) + \beta_5 \cdot HIV + \varepsilon$$

Where

$Edu$  is the mean years of education for the age group 15 to 59

$LDI$  is lag-distributed income

${}_5q_0$  is probability of death from birth to age 5 years

$\alpha_{sex}$  is a fixed effect on sex

$\gamma_{country}$  is a country-level random effect

$HIV$  is the crude mortality rate from HIV for ages 15 to 59

We initialized the model with starting values for each of the  $\beta$  coefficients equal to 0. We tested our model with different starting values, including values from a hierarchical linear mixed effects model, and found that this model was not sensitive to starting values.

The final stage-one predictions were based on predictions from the model above, excluding the country random effect. This was done to facilitate modeling spatial trends in mortality in the second stage. The model predictions were then converted from 45m15 to 45q15 (assuming constant mortality rate within five-year age groups to convert between mx and qx) for incorporation into the second stage model.

### *Second stage spatial-temporal smoothing of residuals*

The first stage regression model reflected the explanatory power of the set of covariates but, as might be expected, failed to explain all of the variation in 45q15. The residuals from the first stage regression were correlated in both time and space, indicating that 45q15 was correlated in time and space in ways that were not fully captured by the covariates included in this regression. We exploited this remaining pattern of variation by applying a local regression to the residuals from the first stage regression, effectively smoothing across time and space.

The local regressions were fitted separately for each of the 21 GBD regions which were constructed so that countries within each region shared similar epidemiological profiles.<sup>25</sup> We applied two variations of local regression to the first stage residuals, both of which utilized the same weighting scheme to incorporate temporal and spatial relatedness. In both variants, a set of weighted linear regressions, one for each country-year of interest, were undertaken. When carrying out the regression for a given country-year of interest, all residuals in the dataset were weighted with respect to this country and year. We first weighted residuals with respect to time using a weighting function similar to that utilized in Loess regression:

$$w_t = \left( 1 - \left( \frac{|r_t - r_{est}|}{1 + \text{argmax}_t |r_t - r_{est}|} \right)^\lambda \right)^3$$

Where

$r_t$  is the year of interest

$r_{est}$  is the year of the residual being weighted

$\operatorname{argmax}_t |r_t - r_{est}|$  is the maximum distance between the year of interest and a residual within the region

The  $\lambda$  parameter in this weighting function dictated how quickly the weights fall off as the distance in time increases: a larger  $\lambda$  implies that the assigned weights will diminish slowly with time, while a smaller  $\lambda$  allows the weights to diminish more rapidly with time.

We then weighted residuals with respect to space by modifying the time weights described below. Weights for residuals within the country of interest were multiplied by a factor of:

$$\frac{\zeta \sum_{i \notin c_{est}} w_i}{(1 - \zeta) \sum_{i \in c_{est}} w_i}$$

Where

$c_{est}$  is the country of interest

$w_i$  is the time weight

As a result of this modification,  $100 \cdot \zeta$  % of the total weight was placed on residuals within the same country, and the remaining  $100 \cdot (1 - \zeta)$  % of the weight was placed on residuals from other countries in the region. For countries with no residuals (i.e. countries with no data) the above factor was 0 and there was no re-weighting. All of the weight consequently remains, by necessity, in other countries in the region. We set  $\lambda$  and  $\zeta$  based on the data density of each location.

The first local regression variant, which we called linear local regression, was a weighted linear regression of the residuals on year and an indicator of the residual from the country currently being estimated:

$$r_{est} = \beta_0 + \beta_1 t + \beta_2 c_{est} + \mathcal{E}$$

If this indicator cannot be estimated, i.e. because there were no residuals in a given country, it is dropped

The second variant, which we called fixed effects local regression, used a weighted linear regression with no covariates. This was equivalent to a simple weighted average of the residuals.

Linear local regression incorporated information from covariates, such as year, but extrapolation was heavily based on that covariate and in settings with sparse data this could result in implausible out-of-sample predictions. In contrast, fixed effects local regression did not incorporate an explicit time-trend

and did not suffer from this problem in extrapolation. However, it was also less adequate at fitting the data in countries with many observations. We therefore combined the estimates from both variants.

As described in the below equation, we calculated the data density ( $d_c$ ) for each country we estimated ( $c_{est}$ ) and then calculated a weighted average of the predictions from the linear local regression and fixed effects local regression where  $d_c\%$  of the weight was assigned to the linear local regression and the rest to the fixed effects local regression. In this way, the final estimates for countries with more VR data were more heavily informed by the linear local regression and the final estimates for countries with less (or no) VR data were predominantly informed by the fixed effects local regression, as was appropriate given the strengths and weaknesses of these two variants.

$$d_c = 100 \times \left( \frac{\# \text{ VR points in } c_{est}}{\text{Maximum \# VR points in any country in the region}} \right)$$

Residuals were logit-transformed before undergoing smoothing; once the final estimates of the smoothed residuals were obtained for every country-year, these estimates were added back into the logit transform of the first stage regression predictions. This sum was then reverse-logit transformed; by carrying out the first two stages in logit-space we restricted the predictions to between 0 and 1. These predictions were called the second-stage predictions.

### Model

The third stage of our prediction method was a GPR

$$\mu_t = f(t) + S_t$$

$$f(t) \sim GP(M, C)$$

Where

$\mu_t$  is the true  $\log_{10}(45q15)$  at time  $t$

$f(t)$  is the baseline mortality risk

$S_t$  captures excess mortality due to war and disasters and is estimated independently of  $f(t)$

$M$  is the Gaussian process mean

$C$  is the Gaussian process covariance

For the Dominican Republic, Peru, and Madagascar, a slightly different model, described in the equation below, was used. For these countries, measurements from sibling histories and from VR were at different levels and the direction of the bias in each source was unknown. We therefore used a model which included a bias term for each source ( $\beta_s$ ).

$$\mu_t = f(t) + \beta_s + S_{t,s}$$

$$\beta_s \sim \text{Normal}(0, 0.01^2)$$

$$f(t) \sim \text{GP}(M, C)$$

GPR is a method of Bayesian inference. We specified a prior distribution for  $f(t)$  and a likelihood function that described the data generation process. The specified prior distributions and likelihood function are described below. We then used MCMC to approximate the posterior distribution of  $f(t)$ , which also incorporated information from the observed empirical estimates of adult mortality. An MCMC chain of length 5,000 was produced. The first 3,000 samples were discarded and the remaining 2,000 were thinned by a factor of 2 for a total of 1,000 simulations retained. Best estimates and confidence intervals were generated from the mean and the 2.5<sup>th</sup> and 97.5<sup>th</sup> percentiles of the 1,000 samples, respectively.

### Priors

The prior distribution of  $f(t)$  can be described in terms of the mean prior—the prior for  $M$ —and the covariance prior—the prior for  $C$ . We utilized the second stage predictions as the mean prior and used a Matérn covariance function to describe the covariance prior. This covariance function incorporated three parameters: the amplitude, which controlled the amount by which realizations of the Gaussian process distribution can deviate from the mean function, the scale, which controlled the distance over which the function was correlated, and the degree of differentiability, which influenced the smoothness of the samples from the Gaussian process. These parameters were selected in the parameter selection process described below.

### Likelihood

The likelihood describes the probability of observing the data given a particular set of parameters. As shown in the below equation, we used a normal model for describing the probability of observing a particular value of  $\log(45q_{15})$ :

$$\log_{10}(45q_{15t}) \sim \text{Normal}(f(t), V_t)$$

Where

$f(t)$  is the mean

$V_t$  is the data variance

Data variance was calculated for each empirical observation of 45q15 and incorporated both sampling and non-sampling variation. The method for calculating the data variance depended on the type of data. We computed sampling variance from a binomial model. We set  $N$  equal to the national population aged 15 to 59 years and  $p$  equal to the mortality rate, 45m15. We calculated the variance of 45m15 from



$$\frac{p(1-p)}{N}$$

and then transformed this to the variance of  $\log_{10}(45q_{15})$  using the delta method. For estimates derived from both complete and incomplete VR data, we included not only sampling variance but also the non-sampling variance that arises from uncertainty in the completeness estimate. For these data, the total data variance was given by the sum of the sampling variance (calculated as for complete VR data) and the variance of the completeness estimate (calculated as described in section 2.2.6).

For estimates derived from sibling history, census, or survey data, the MAD estimator of the variance was calculated by source type with reference to the second stage predictions, as described in the equation, where  $s$  is the source type (sibling history, census, or survey):

$$\begin{aligned} \theta_s^2 &= (1.4826 \cdot MAD_s)^2 \\ &= 1.4826 \\ &\quad \times \text{median}(|(\log_{10}(45q_{15}^{observed}) - \log_{10}(45q_{15}^{predicted})) - \text{median}(\log_{10}(45q_{15}^{observed}) - \log_{10}(45q_{15}^{predicted}))|)^2 \end{aligned}$$

Where  $s$  is the source type (sibling history, census, or survey).

### Hyperparameter selection for adult mortality rate ST-GPR

Similar to the new parameter selection in U5MR, hyperparameters for adult mortality were selected based on a newly-created data density score for a given location and sex. For adult mortality, the data density score was calculated for each location and sex based on the number of deaths and the number of sibling histories. The score was computed using the following steps:

1. Calculate death number score: this component of data density was computed based on the number of deaths calculated from the DDM process. This includes both unadjusted complete deaths and adjusted deaths from incomplete sources.
2. Sibling histories: for each sibling history for a location, year, and sex, we assigned a score of 15.
3. Next, we added the death counts and the sibling history scores together for each year and sex. We then capped the sum at 1000 for each year and sex and then divided that number 1000. The result was a score for each year and sex between 0 and 1. To get the final complete VR score for a location and sex, we added up the score for each year across the full time series.
4. Once the data density for a location was calculated, we assigned the following hyperparameters:

Table B

| Data Density | Zeta | Lambda | Scale |
|--------------|------|--------|-------|
| 0 to 9       | 0.6  | 0.7    | 25    |
| 10 to 19     | 0.7  | 0.5    | 20    |
| 20 to 29     | 0.8  | 0.4    | 15    |
| 30 to 49     | 0.9  | 0.3    | 10    |
| 50 plus      | 0.99 | 0.2    | 5     |

We developed the data density score through iterative testing taking into account the view that different sources such as complete VR or complete birth histories are more prone to non-sampling measurement error than others. Specific cutoffs for VR deaths were tested to take into account the sample size of the source. Weights were also iteratively tested and refined.

### Section 2.3.6: Identify and remove outliers

To arrive at sensible levels and trends for the adult mortality rate, certain outliers were excluded from our ST-GPR regression process. In general, we used the following process to outlier influential raw data points that otherwise lead to erroneous 45q15 estimates:

1. Raw input 45q15 data points from years affected by war, natural disasters, and other fatal discontinuities as defined in GBD 2016 were excluded from the analysis described in section 2.4.
2. Examination of survey/registration data quality resulted in the selective exclusion of some raw data sets. Examples include the Afghanistan 2010 Mortality Survey that was not nationally representative and VR data from Serbia that excluded deaths from Kosovo.
3. Visual inspection of raw input data on 45q15 and estimated time series estimates of 45q15 from ST-GPR by GBD researchers and country experts through the GBD collaborator network. Data points were outliered when they were unexplainably different from other adjacent points from the similar source, indicating a data reporting issue and compilation error in the direct sources. Some subnational-level single year 45q15 estimates from sibling survival methods were excluded due to unreasonably high or low estimates resulting from small sample sizes.

### Section 2.3.7: Rake subnational estimates to national level (excluding South Africa)

First, we randomized the order of the 1,000 subnational-level draws and the national draws separately to avoid any correlation between subnational and national draws that might have been introduced in prior processes.

GBD 2017 provided estimates of 45q15 for 918 locations at both subnational and national levels. While it was absolutely essential to use input data from the subnational level in informing the level and trend of 45q15 for the corresponding location, the national level data tended to be more robust, incorporate more data sources, and cover longer time periods. To develop consistent estimates between aggregated subnational level estimates and the separately estimated national level estimates, we raked the subnational 45q15 to match our national level 45q15 estimate using the following formulas:

$${}_{45}q_{15}^{s'} = 1 - e^{-45 \times {}_{45}M_{15}^s \times r}$$

And

$$r = \frac{\frac{\ln(1 - {}_{45}q_{15}^N)}{-45}}{\sum_{s=1}^n \ln(1 - {}_{45}q_{15}^s) \times \frac{p_s}{-45}}$$

Where

$s$  is subnational locations within country  $N$

$p$  is population in age group 15 to 59

${}_{45}q_{15}$  is the estimate of adult mortality rate from the ST-GPR process

${}_{45}q_{15}^{s'}$  is the post-raking  ${}_{45}q_{15}$  for subnational locations

### Section 2.3.8: Review estimates for quality

The preliminary estimates of adult mortality rates were reviewed by both the researchers who work on the demographic estimation process and the GBD all-cause mortality collaborator network. Concerns regarding quality of certain survey and data points were raised and reviewed, which lead to revision of the database where applicable.

### Section 2.3.9: ${}_{45}q_{15}$ estimates with HIV

The results of the adult mortality rate ST-GPR process were estimates of probability of death from all causes of death except fatal discontinuities for all locations covered in GBD 2017 for 1950 to 2017.

## Section 2.4: Model life table system

### Section 2.4.1: Overview

In settings without complete VR systems, data were often available for some summary measures of mortality such as  $5q_0$  (from complete or summary birth histories) and  ${}_{45}q_{15}$  (from sibling surveys). Model life tables, structured relationships between levels of age-specific mortality at different ages, can be used to generate estimates of age-specific mortality for detailed age-groups from summary  $5q_0$  and  ${}_{45}q_{15}$ . Model life tables may also simplify mortality projection from the most recent empirically observed data. This is true even for countries with high quality VR systems, due to the fact that compilation of VR data may take several years before publication.

An ideal Model life table system has several desirable attributes. First, a model life table system should be efficient and require only a few entry parameters to generate a full life table with age specific mortality rates. Second, it should adequately capture the range of age patterns of mortality observed in real populations. Third, it should provide satisfactory estimates of age-specific mortality for countries with high levels of mortality, especially those with substantial HIV/AIDS epidemics. Finally, a model life table should generate age-specific mortality with a plausible time trend, and the partial derivative of age-specific mortality should be positive with respect to entry parameters such as  $5q_0$  and  ${}_{45}q_{15}$ .

A simple and somewhat flexible model life table system was proposed by Brass.<sup>17</sup> In general the logit of the  $l_x$  (proportion of a hypothetical birth cohort still alive at age  $x$ ) column in a life table could be

represented as a linear transformation of the logit of the  $l_x$  column of a reference standard life table. Murray et al. noted that as a population moved further away from the levels of mortality in the reference standard, the assumption of linearity in logit  $l_x$  space was violated.<sup>26</sup> A series of age-specific modification factors were proposed that allowed for the characteristic bending of the logit  $l_x$  function compared to the standard. Murray et al. also assessed the ability of this modified logit life table system to predict age-specific mortality rates. This modified logit life table system, with its built-in optional mechanism of predicting 45q15 from child mortality 5q0, has been extensively used by the World Health Organization since the early 2000s.<sup>26</sup>

This system, however, suffers from two major limitations. First, when adult mortality was very high relative to child mortality, such as in the presence of an HIV/AIDS epidemic, the age patterns of mortality generated did not fit well to the observed data. Second, when the modified logit life table system was applied to time series of 5q0 and 45q15, paradoxical trends developed where adult and child mortality declined, but predicted age-specific death rates increased in some age groups. We have extended the modified logit life table system to deal with these two major limitations. Wang et al. provide a more complete discussion of the development of this approach.<sup>3,5</sup> We summarize these developments in brief here. There were four distinct steps.

#### Section 2.4.2: Building an empirical model life table database: data sources and quality review

Relational model life table systems critically depend on the empirical database used to generate model life table standards and test the predictive validity of model life tables. For both all-cause mortality and cause-specific mortality analyses in GBD, we amassed a comprehensive database on human mortality from full VR systems, and sample VR systems such as the SRS from India and the Disease Surveillance Point system from China. These aforementioned data sources provided a total of 42,138 abridged empirical life tables prior to outliering or smoothing (Appendix Table 6). We adjusted each source by estimated completeness in the 5q0 or DDM process, applying under-5 completeness to ages under 1 and 1 to 4, adult completeness to all ages above age 15, and a weighted combination of child and adult completeness to ages 5 to 9 and 10 to 14.

For each life table, within each location, we sort life tables by year and generate smoothed lifetables using moving averages of widths of 3, 5, and 7 within each location. This smoothing helped address jumps or drops in age-specific mortality in locations where small numbers of deaths resulted in high variability of mortality patterns across age.

As with previous cycles of the GBD, we have two sets of life tables that meet inclusion criteria: a universal set that is used for all locations to identify matches and a location-specific set that is used along with the universal set for each location. We generated inclusion criteria to help guide which of the unsmoothed or smoothed life tables had consistent enough age patterns for inclusion in the life table selection process. In particular, the most common problems with life tables were jumps in age-specific mortality due to low populations or overall low mortality (such as in age group 5-9 in British subnational locations), old-age misreporting or heaping, or implausible trends due to data extraction or reporting issues. We formalized the inclusion criteria to be as follows:

- Inclusion criteria for either life table set:
  - The variance in the change in log probability of death across age, for ages between 60-90, must be below .02.
  - For ages 20 and above, the probability of death cannot drop by more than 25% and be immediately followed by an increase of more than 50%, from age-group to age-group.
  - For ages 20 and above, the probability of death cannot double and be immediately followed by a decrease of more than 50%, from age-group to age-group.
  - There must be 1 or fewer drops in probability of death from age-to-age, for ages above 65.
  - For ages 70 and above, the probability of death cannot decrease by more than 5% from age-group to age-group.
  - For ages 80-84, 85-89, or 90-94, the probability of death must be below the 99th percentile of the age-specific probability of death values of lifetables in the HMD lifetable database.
  - The estimated DDM registration completeness must be greater than 50%.
  - The percent change of 5q75 to 5q80 must be within 20% for males, or 30% for females, to the predicted percent change from a linear regression based on high-quality VR lifetables from the Human Mortality Database, using the relationship between the value of 5q80 and the percent change from 5q75 and 5q80. This was generated to address locations where probabilities of death in older ages accelerated rapidly or stagnated from one age group to another.
  - The percent change of 5q80 to 5q85 must be within 30% of the predicted value from a linear regression of the HMD lifetable dataset using the relationship between the value of 5q85 and the percent change from 5q80 and 5q85.
  - The 5q5 must be greater than .0001, and 5q10 must be greater than .0002, which are roughly the lowest levels observed in current GBD country-level results. These occur mostly in subnational locations with low populations and resultingly low and variable young-age mortality.
  
- Inclusion criteria for the universal life table database (in addition to the general inclusion criteria):
  - The variance in the change in log probability of death across age, for ages between 60-90, must be below .01.

- There must be no drops in probability of death values from age-to-age, for ages above 65.
- The estimated DDM registration completeness must be greater than 85%.
- The GBD population model for the country/sex must use terminal-age data starting at age 80 or higher
- The adult HIV crude death rate must be below 0.001%.
- The relationship between  $5q_{80}$  and the percent change of  $5q_{75}$  to  $5q_{80}$  must be within 15% of HMD predicted values for males, and 20% for females.
- The relationship between  $5q_{85}$  and the percent change of  $5q_{80}$  to  $5q_{85}$  must be within 15% of HMD predicted values for both sexes.
- The estimated both-sex population for the country must exceed 1 million.

Life tables that met all of the general inclusion criteria but not all of the universal life table inclusion criteria are categorized as location-specific life tables. Following application of the inclusion criteria, additional life tables were excluded from the life table database based on review for implausible trends across ages or country-years of data.

Our modified life table system was originally developed using a database of 3,566 life tables covering 63 countries.<sup>26</sup> Using the inclusion criteria above, we have expanded this database to include 10,885 universal and 24,222 location-specific life tables, for a total of 35,107 life tables.

In addition, all life tables in our database with a crude death rate due to HIV/AIDS over 0.1% in adult age groups were excluded via the process described in Section 2.5.

### Section 2.4.3: Extending age-specific mortality to age 100+

To extrapolate age-specific mortality beyond age 85, we generally used the Gompertz law of mortality and other functional model age pattern of mortality methods that assume a roughly exponential increase in mortality in old ages.<sup>9,27</sup> Age-group dummies and probability of dying from age 80 to 84 in logarithmic scales were used to estimate the difference in age-specific probability of dying in logit scale between two consecutive age-groups, as described in the following equation:

$$\text{logit}({}_5q_x^{j,t,g}) - \text{logit}({}_5q_{x+5}^{j,t,g}) = \alpha^g + \beta_x^g \cdot \text{age} + \gamma^g \cdot \text{logit}({}_5q_{80}^{j,t,g}) + \eta_j^g + \xi_x^{j,t,g}$$

Where

$j$  refers to country

$g$  refers to sex

$t$  refers to time

Parameters were estimated using data from selected countries in the Human Mortality Database with high quality VR data in the oldest old age groups above age 80.<sup>28</sup> The parameters estimated from the model above were then used to generate age-specific probability of death from age 85 to 109.

#### Section 2.4.4: GBD relational model life table system with a flexible standard selection mechanism

Our relational model life table system was based on the logic that in order to capture the very high levels of younger adult mortality seen in populations with high HIV prevalence, we needed to develop a model life table for a counterfactual population without HIV and then add on the effects of HIV by age and sex. This system was captured in three components. We first estimated counterfactual levels of 5q0 and 45q15 in the absence of HIV. Then a full set of age-specific death rates were generated using the model life table system from the counterfactual levels of child and adult mortality. Finally, we estimated the increase in mortality specific to each age group associated with HIV.

##### *Model for populations free of HIV/AIDS*

We made several innovations in estimating a set of age-specific death rates from 5q0 and 45q15 using a relational model life table. A key change from previous relational model life table systems was the shift to modeling  $q_x$  in logit space rather than the  $l_x$  in the same space. Modeling  $q_x$  enabled us to more precisely capture the different impacts of changes from the two entry parameters (5q0 and 45q15) on different age-groups. The following equation provided the life table for populations not affected by HIV/AIDS.

$$\text{logit}({}_nq_x^c) = \text{logit}({}_nq_x^s) + \beta_x^1 \cdot (\text{logit}({}_5q_0^c) - \text{logit}({}_5q_0^s)) + \beta_x^2 \cdot (\text{logit}({}_{45}q_{15}^c) - \text{logit}({}_{45}q_{15}^s)) + \xi_x$$

Where

$\text{logit}({}_{45}q_{15}^s)$  is the logit transformation of 45q15 in the standard life table

$\text{logit}({}_{45}q_{15}^c)$  is the logit transformation of 45q15 value for a country without HIV or the counterfactual level of 45q15 in the absence of HIV in a country affected by HIV/AIDS

$\text{logit}({}_5q_0^s)$  is the logit transformation of 5q0 in the standard population

$\text{logit}({}_5q_0^c)$  is the logit transformation of 5q0 for a country without HIV or the counterfactual level of 5q0 in the absence of HIV in a country affected by HIV/AIDS

$\text{logit}({}_nq_x^s)$  is the logit of the probability of death in the standard population from age  $x$  to  $x + n$

$\text{logit}({}_nq_x^c)$  is the logit transformation of the probability of death from age  $x$  to  $x + n$  in a country without HIV or the counterfactual level of  ${}_nq_x$  in the absence of HIV in a country affected by HIV/AIDS

$\beta_x^1$  and  $\beta_x^2$  are coefficients that vary by age  $x$  and that measure the impact of differences in child and adult mortality rates between a target life table and the standard life table on the estimated age pattern of mortality. These coefficients determined how much the estimated age pattern of mortality deviated from the standard by age and from linearity.

This equation proposed that the logit-transformed age-specific probability of dying in a target life table ( $c$ ) could be represented as a function of the corresponding logit-transformed age-specific probability of dying in a standard life table ( $s$ ) and the differences in probability of dying from age 0 to 5 in logit scale and the difference in probability of dying from age 15 to 60 in logit scale between a pairs of life tables,  $c$  and  $s$ . Life table  $c$  was the estimated HIV-free life table either for a country affected by the epidemic or not. The model was based on empirical observation where the differences in age specific probabilities of dying in logit scale between two life tables were highly correlated with differences in 5q0 or 45q15 in logit scale when the HIV/AIDS epidemic was not present.

Coefficients  $\beta_x^1$  and  $\beta_x^2$  were estimated using the following equation:

$$\text{logit } {}_nq_x^c - \text{logit } {}_nq_x^s = \beta_x^1 \times (\text{logit } {}_5q_0^c - \text{logit } {}_5q_0^s) + \beta_x^2 \times (\text{logit } {}_{45}q_{15}^c - \text{logit } {}_{45}q_{15}^s) + \xi_x$$

In estimating the parameters, we used country-time specific and region-specific (i.e., GBD region) standards for each life table in our database not affected by HIV/AIDS (other aggregated standard life tables clustered by different geographical or epidemiological criteria were also possible). Country-time specific standard life tables were used whenever an empirical life table from the same country within a 15-year time frame was available in our database. Region specific standard life tables were generated by collapsing all zero-HIV life tables in our database from the same GBD region by sex. We then paired up all zero-HIV life tables in our database with the generated region specific life tables.

The estimated  $\hat{\beta}_1$  and  $\hat{\beta}_2$  are shown in the table below. We limited the effects of 5q0 and 45q15 to certain age groups to avoid implausible outputs when 5q0 and 45q15 from a population change in opposite directions. Using the values in the table below also generated full life tables for populations not affected by HIV/AIDS. The values of 5q0 and 45q15 served as points of entry (or entry parameters) for this model life table system.



Table C. Model life table coefficients

| Age   | Difference in 5q0 (logit scale) |        | Difference in 45q15 (logit scale) |        |
|-------|---------------------------------|--------|-----------------------------------|--------|
| Age   | Male                            | Female | Male                              | Female |
| 0     | 0.993                           | 0.982  | --                                | --     |
| 1-4   | 1.005                           | 1.047  | --                                | --     |
| 5-9   | 0.823                           | 0.766  | --                                | --     |
| 10-14 | 0.468                           | 0.368  | 0.386                             | 0.507  |
| 15-19 | 0.134                           | 0.147  | 0.823                             | 0.776  |
| 20-24 | 0.042                           | 0.136  | 0.828                             | 0.865  |
| 25-29 | 0.029                           | 0.121  | 0.775                             | 0.925  |
| 30-34 | 0.018                           | 0.094  | 0.784                             | 0.935  |
| 35-39 | --                              | --     | 0.871                             | 1.064  |
| 40-44 | --                              | --     | 0.906                             | 0.990  |
| 45-49 | --                              | --     | 0.924                             | 0.921  |
| 50-54 | --                              | --     | 0.903                             | 0.878  |
| 55-59 | --                              | --     | 0.855                             | 0.860  |
| 60-64 | --                              | --     | 0.792                             | 0.838  |
| 65-69 | --                              | --     | 0.786                             | 0.866  |
| 70-74 | --                              | --     | 0.801                             | 0.911  |
| 75-79 | --                              | --     | 0.799                             | 0.914  |
| 80-84 | --                              | --     | 0.709                             | 0.832  |

Our standard life table computation procedure took into account empirical relationships between differences in geography, time, and mortality age patterns. To generate a standard, we first calculated the Mahalanobis distance between the target life table and all zero-HIV empirical life tables of the same sex in our database based on 5q0 and 45q15 (in logit scale). The Mahalanobis distance between two sets of 5q0 and 45q15 was defined as:

$$D_M^i(Q^i) = \sqrt{(Q^i - O)^T S^{-1} (Q^i - O)}$$

Where

$O$  is a multivariate vector representing entry parameters 5q0 and 45q15 in logit scale

$Q^i = (\text{logit}({}_5q_0^i), \text{logit}({}_{45}q_{15}^i))$  is a multivariate vector that corresponds to an empirical life table  $i$  in our life table database

We chose Mahalanobis distance over Euclidean distance because 5q0 and 45q15 were highly correlated in logit space (the correlation coefficients were 0.58 and 0.87 for males and females, respectively), and Mahalanobis distance takes the covariance matrix of 5q0 and 45q15 in logit scale into consideration when calculating the distance between any pair of life tables. We then kept the 100 most similar life tables as measured by the Mahalanobis distance, along with all life tables within 30 years from the

location itself, and then kept 100 of those life tables that were closest in terms of geography and distance in years.

Next, instead of obtaining a simple arithmetic mean of all selected life tables, we applied empirical weights to each selected life table and computed the weighted average. We updated the weights from GBD 2016<sup>7</sup> to provide more relative weight to lifetables from the country or neighboring subnational locations, in part to adjust for using 100 lifetables for all locations. Specifically, we increased the location-specific weights by 25 times, the location-specific 0- and 1-year lag weights by 15 times, and the 2-, 3-, and 4-year lag weights by 3 times. The change in year-lag weights helped to preserve the age pattern of the most recent years of data when projecting mortality forwards, carrying over sudden shifts in age-specific mortality such as in young adults in the United States in recent years. In addition, we generated a new level of weights for locations within the same parent-country of life tables, to allow subnational life tables to provide more weight than life tables in the region overall.

For an example location with 30 location-specific matches and 70 subnational neighbor matches, the relative weight of the location/year-specific life table would be at least .60 for males and .61 for females, and the combined weight of the two closest location-year life tables would be at least .84 for both males and females. The relative weight for country-specific life tables depends greatly on the compositional time-lag of the country-specific life tables and the number of included subnational neighbor and regional life tables.

Figure. Empirical weights by lag in time and geographic region for males.

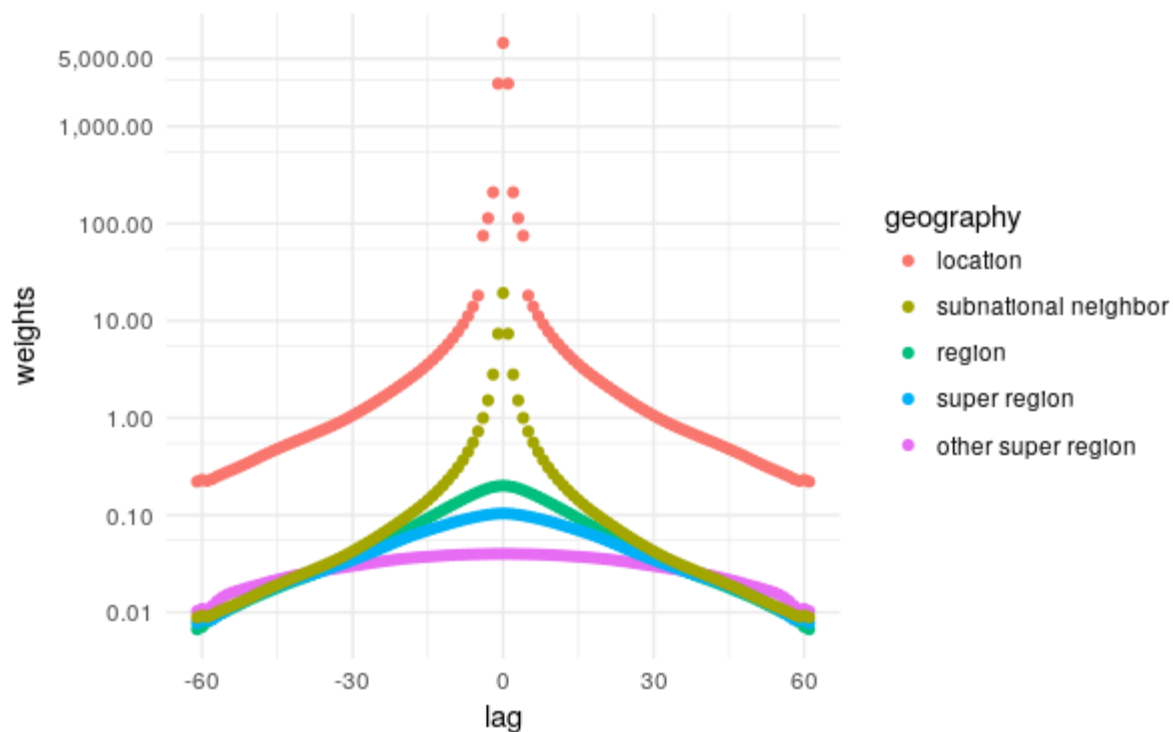

### Estimating AIDS

Perhaps the most challenging issue for all existing model life table systems is providing plausible age specific mortality estimates given an HIV/AIDS epidemic. Both widely used model life table systems, the Coale-Demeny model life tables and the Modified Logit Life Table system, were largely based on empirical life tables from the pre-HIV era. In addition, they did not provide an integrated solution to the problem of incorporating deaths from HIV/AIDS.

In GBD 2016 and GBD 2017, we applied a two-step process where we first estimated the HIV/AIDS counterfactual age pattern of mortality using the method described in section 2.6, with HIV counterfactual 5q0 and 45q15 as entry parameters. Excess mortality due to HIV/AIDS in summary age groups of under-5 and age 15 to 59 were then added to the HIV-free age specific mortality.

For GBD 2016 and GBD 2017, we added excess mortality due to HIV to specific age groups by location, year, and sex. In this step, we extracted number of deaths due to HIV estimated using the Spectrum HIV model, and constructed relative risk (defined as the ratio of HIV-specific mortality between a specific age group and age group 40-44).

$$R_i = \frac{nM_x^{HIV}}{5M_{40}^{HIV}}$$

Where  $i$  indicates different age groups 0, 1-4, 4-9, 10-14, etc.

Because the Estimation and Projection Package (EPP)/Spectrum was run at the draw level, we had 1000 draws of relative risks of dying from HIV/AIDS by location, sex and time. This was different from the relative risks used in previous iterations of GBD that were estimated using available VR data and by types of epidemic.

### *Estimating all-cause mortality for South Africa*

For all locations except South Africa, the estimation of all-cause mortality followed the two step process where we generated the HIV-free age pattern of mortality first, then we added the excess mortality due to HIV/AIDS. However, we leveraged the age pattern of all-cause mortality from South Africa's near-complete VR system to inform our all-cause mortality process. For this purpose, we used observed VR from South Africa and applied the two step model life table process as used for all other populations in reverse order. We first estimated with HIV mortality using observed VR, with HIV included to generate the standard life table. Then excessive mortality due to HIV was removed from the estimated all-cause mortality using the relative risk of dying from HIV estimated in the Spectrum model.

The advantage of this process was that we were able to match the completeness-adjusted VR data by age, and the age pattern of HIV-specific mortality matched the estimates in the EPP/Spectrum epidemiological model.

### *Uncertainty in the estimated life tables*

One important attribute of GBD was the inclusion of uncertainty in every single step of the GBD mortality estimation process. We integrated uncertainty from the entry parameters (5q0 and 45q15) and the coefficients of each model based on the method illustrated by King et al.<sup>29</sup> Essentially, the model life table process described above was repeated 1,000 times based on randomly paired entry parameters (thus different standard life tables) and model coefficients. As a result of this process, we had wide uncertainty intervals in the estimated deaths in countries where uncertainties in estimated entry parameters were high.

### *Section 2.4.5: Rake subnational life tables to national level (excluding South Africa)*

Since in most countries data were scarcer for subnational units than they were at the national level, estimates of subnational mortality required adjustment for consistency with national estimates. To generate consistent time series estimates of all-cause mortality, including mortality rates and death numbers, we raked subnational-level estimates to separately-estimated national level estimates. For the mortality envelope, we applied a national scalar such that the sum of the subnational location mortality envelopes matched the mortality envelope separately estimated for the national level.

The only exception to this subnational-to-national raking process was South Africa, where we aggregated subnational level estimates as our national level estimates. Based on our observation in previous iterations of GBD, the high level of heterogeneity in the HIV/AIDS epidemic at the subnational

level in South Africa introduced a challenge to accurate estimation of both all-cause and HIV cause-specific mortality in South Africa at the national level. Since our EPP-Spectrum model generated estimates at the province level for South Africa, we produced province-level all-cause mortality estimates using all available subnational sources of child and adult mortality rates and aggregated province-level results as our final national-level estimates for South Africa. The number of data sources were found to be comparable at the national and provincial levels.

## Section 2.5: HIV/AIDS estimation

### Section 2.5.1: Age-specific mortality (with and without HIV)

The with-HIV and without-HIV age-specific mortality rates were part of the model life table process as inputs to the HIV/AIDS estimation described in Section 2.5.

### Section 2.5.2: HIV-free survival rates (for Spectrum)

The age-specific HIV-free survival probabilities from the model life table process were used to create inputs for Spectrum. We used the same method to generate single-year mortality based on 5-year abridged life tables as is later used to generate single-year mortality as an input into the population modeling process.<sup>1</sup> These single-year probabilities of HIV-free survival were then used as inputs to Spectrum.

### Section 2.5.3: EPP and Spectrum

For the GBD analysis of HIV, we used variants of two tools developed by UNAIDS:

1. The EPP, which generated time series estimates of HIV incidence and prevalence consistent with observed prevalence data in ages 15-49 in countries with generalized epidemics. EPP uses many of the same assumptions as Spectrum but fits a simpler model to HIV prevalence data from surveillance sites and representative surveys. Antenatal care, incidence, prevalence, and treatment coverage data from UNAIDS were used in modeling for all locations. We extracted all of these data from the proprietary format used by UNAIDS.
2. The Spectrum natural history model predicted incidence, prevalence, and death by age, sex, and year using an estimated time series of HIV incidence, demographic inputs (including HIV-free mortality and population), assumptions about CD4 progression rates, and assumptions about on- and off-ART HIV death rates by age, sex, and CD4 rate. We utilized time series of treatment coverage provided in UNAIDS national HIV estimates files. For GBD 2017, we improved our sex-specific modeling strategy in Spectrum by sex-splitting incidence based on a model fit to the sex ratio of prevalence observed in countries with representative surveys. We also updated the Spectrum pediatric module to reflect changes made by UNAIDS.<sup>30</sup> Our child module was revised to include CD4 progression and CD4-specific mortality rates taken from a model fit to survival data from the International epidemiology Databases to Evaluate AIDS (IeDEA), an international collaboration on HIV cohorts. We also updated child initiation of ART to include data on ART distribution from IeDEA.

Both tools were modified for use in the GBD. Beginning with GBD 2013, we created an exact replica of Spectrum in Python. This enabled us to run thousands of iterations of the model at once on our computing cluster and allowed for more flexible input data structures. We also, again, ran EPP using an open-source computer program in R written by Jeffrey Eaton.<sup>31</sup> We ran EPP for all Group 1 countries in order produce incidence and prevalence estimates that were consistent with the demographic and epidemiological assumptions used in GBD 2017.

#### Section 2.5.4: HIV/Mortality Reckoning

The reckoning process was intended as a method of reconciling separate estimates of HIV mortality (and their resulting effect on estimates of HIV-free and all-cause mortality) due to two separate estimation processes within the GBD all-cause and HIV estimation framework: those from the model life table system as a way to capture the impact of HIV on age pattern of all-cause mortality, and the those from the natural history model of EPP-Spectrum as used by GBD and UNAIDS. In addition, we also utilized space-time GPR-smoothed VR data on HIV-specific mortality for countries with good quality VR instead of using mortality estimates from Spectrum.

As part of the HIV/AIDS estimation process, all GBD 2017 locations were assigned to a modeling strategy group, depending on the level of HIV within the country and the availability and quality of HIV and VR data. Group placements (Appendix Table 7) determined which sources were used for HIV-specific mortality data and how final estimates of HIV and all-cause mortality were calculated.

Group 1 included countries with greater than .25% adult prevalence of HIV and available HIV prevalence survey data and/or antenatal care (ANC) clinic data. We ran the EPP model using these available input data for all locations in Group 1. Demographic assessments for these locations depended substantially on sibling history data analysis, which had large uncertainty intervals and for which there may have been local variation in response biases. India, Sudan, and Somalia were classified as Group 1B, since they had available surveillance data but adult HIV prevalence less than .5%. In these locations, all-cause mortality estimates were taken from the model life table system while HIV-specific deaths were estimated using EPP-Spectrum. SRS data informed the age-pattern of mortality in India through adjustment of age-specific incidence in Spectrum to better match observed deaths.

Group 2A locations were classified as high quality (4 or 5 star) VR systems per the GBD VR quality rating system.<sup>32</sup> Because these locations had high-quality VR data, all-cause mortality estimates were driven by national data; the VR system was a robust source of data for HIV deaths.

Locations with lower quality VR comprise Group 2B. Locations without any VR data were added to Group 2C.

For HIV-specific mortality estimates, Group 2A locations used mortality output directly from the ST-GPR process due to the high quality of their VR systems. Group 1A and 1B locations used Spectrum output, while Group 2B and 2C locations used output cohort incidence bias adjusted (CIBA) deaths due to HIV/AIDS from the Spectrum model.<sup>33</sup>

Outputs were modeled to include an under-1 age group without the early-, late-, and post-neonatal groups. To attribute under-1 deaths from Spectrum to these neonatal groups, we assumed that all HIV deaths that occur within the first year of a child's life occur in the post-neonatal stage (after 28 days). The literature on HIV in these age groups is still unclear, but seems to indicate higher mortality in the post-neonatal stage. There is no clear evidence to guide alternative methods of age-splitting under-1 deaths due to HIV.<sup>13,14</sup>

### Section 2.5.5: Envelope Calculation

In general, the all-cause and HIV-deleted envelopes were generated by synthesizing the results from the with-HIV and HIV-free life tables, along with selected HIV mortality from ST-GPR, Spectrum output, or cohort incidence bias adjusted Spectrum output (CIBA-Spectrum). We used with-HIV and HIV-free life tables to ascertain the implied HIV mortality from the model life table system.

For age groups under age 5, we used the under-5 results from the age-sex process described in section 2.2.14. In Group 1A and 1B locations we generated a scalar based on Spectrum results of HIV-specific and non-HIV deaths to generate HIV-deleted envelope deaths based on the all-cause results from the envelope. In other locations, we directly subtracted mortality from ST-GPR or Spectrum, after capping HIV at 90% of the all-cause envelope, to generate the HIV-deleted envelope. As mentioned previously, we made the assumption that all under-1 HIV-specific deaths occur in the post-neonatal stage.

In all groups except Group 1A, we subtracted mortality for all ages over 5 and under 15 from Spectrum or ST-GPR directly from the all-cause with-HIV envelope, after capping HIV at 90% of the all-cause envelope. In Group 1A, we directly used the HIV-free mortality and added mortality from Spectrum to generate the all-cause with-HIV envelope.

For ages above 15 and below 95, we applied separate approaches for Group 1A and 1B locations compared to Group 2A, 2B, and 2C locations. Group 1A and 1B locations used HIV mortality determined by an ensemble model where we averaged the implied HIV mortality from the model life table process and the HIV mortality output by Spectrum, which were intrinsically linked by the draw-level HIV-free mortality age pattern. Group 2A, 2B, and 2C locations used HIV mortality directly from ST-GPR and CIBA-Spectrum. For all locations except Group 1A, we subtracted the calculated HIV mortality from the all-cause envelope to generate HIV-deleted envelope deaths. In Group 1A we added the HIV mortality to HIV-free mortality from the model life table process to calculate all-cause mortality, effectively allowing all-cause mortality from the demographic estimation process to be changed based on our ensemble HIV estimates. This reflected the inherent uncertainty in all-cause mortality estimates largely based on sibling survival data in Group 1A locations and the various assumptions on mortality and program data required in both EPP and Spectrum.

For the age group 95 and above, we first approximated the over-95 mortality rate by using our life table output and divided  $l_x$  by  $T_x$  from the age 95-99 values in the country-specific life tables. We then calculated a scalar from the approximated all-cause mortality rate from the life table to the all-cause mortality rate utilizing the envelope deaths/populations. We used this scalar to rescale the with-HIV and

HIV-free life tables and the implied HIV death rate to death number space. Finally, HIV-deleted and all-cause mortality were determined by the same approaches as used for other ages above 15.

#### Section 2.5.6: Life Table Calculation

Generally, life tables were calculated using an approach consistent with those used in calculating the envelope. However, there were a few differences in calculation particularly related to sex and location aggregation.

For Group 1A locations, we multiplied the HIV-free life table results by the ratio to obtain all-cause life table results. In all other locations, we divided the all-cause life table by the ratio to obtain the HIV-free life table results. This was consistent with their handling during the envelope process.

For aggregate locations, we generated aggregated  $mx$  and  $ax$  (the average number of years lived in the age interval, of those who died in the age interval) by weighting  $mx$  by population and  $ax$  by deaths: here, calculated by

$$mx \times population$$

Population- and death-weighted regional  $mx$  and  $ax$  values were used to generate region-level life tables.

A similar approach was applied to calculating the envelope for the under-5 age groups. However, the national-level under-5 results were substituted for the aggregated  $mx$  and  $ax$  values from the subnational units when we calculated the all-cause life table for countries with subnational locations. This approach was used for all aggregate countries except South Africa, where we aggregated the national results from subnational results (consistent with our approach in 5q0, 45q15, and the model life tables). The under-5 national aggregates were used to preserve the estimated under-5 mortality results from our 5q0 data synthesis and age/sex splitting modeling processes, which were not necessarily equivalent to those generated by the aggregated  $mx$  and  $ax$  values from the model life table process. We aggregated subnational units using the regular weighting scheme for HIV-deleted life tables.

#### Section 2.5.7: HIV crude death rates for under-5 and ages 15-59

Final HIV death rates were calculated based on the results of the Envelope Calculation portion of the reckoning process.



## Section 2.6: Age-specific mortality estimation for all GBD age-groups: with and without HIV

### Section 2.6.1: Age-specific mortality without discontinuities (with HIV/AIDS)

Age-specific mortality rates without fatal discontinuities were generated using the model life table system (Section 2.4), age-sex model (Section 2.2.11), and HIV reckoning process (Section 2.5.4) depending on the location groups.

Age-specific mortality was calculated from our age-sex model that split U5MR into mortality for age groups early neonatal (enn), late neonatal (lnn), post neonatal (pnn), and ages 1-4. Age-specific mortality rates in ages 5 and older were generated using the GBD model life table system (described in Section 2.5) for Groups 1B, 2A, 2B, and 2C locations. For Group 1A locations, age specific mortality with HIV was produced as the sum of HIV-free mortality rates generated in the first step of the model life table system (described in Section 2.5) and the results of the ensemble model for HIV-specific mortality (described in Section 2.6).

### Section 2.6.2: HIV-deleted age-specific mortality

HIV-deleted age-specific mortality was used in CoD analyses in GBD 2017 to avoid the spillover effect of HIV mortality into other causes, particularly for locations affected by high HIV burden. We used the difference between the age-specific mortality with HIV without fatal discontinuities (described in Section 4.1) and the HIV-specific mortality as a result of the HIV reckoning process (Section 2.5.4).

### Section 2.6.3: Add fatal discontinuities

In our mortality estimation process, we excluded data from years with fatal discontinuities to ensure that these sudden idiosyncratic increases in mortality did not affect long-term trends in mortality for a given country. This section details how we added the deaths due to fatal discontinuities to the all-cause mortality envelope and life tables. See Section 4 for more information on how fatal discontinuity death numbers were estimated.

To incorporate deaths due to fatal discontinuities into the mortality envelope, 1,000 draws of deaths due to fatal discontinuities were added pairwise to 1,000 draws of the with-HIV mortality envelope for each location, sex, and age group. Ninety-five percent uncertainty intervals were calculated as in other processes, taking the 97.5% and 2.5% quantiles of the summed draws.

To incorporate fatal discontinuity deaths into the life table, we first generated full single-year with-HIV life tables as detailed in the GBD 2017 Population and Fertility paper<sup>1</sup>. We calculated fatal discontinuity mortality rates by assuming the same mortality rate for each single-year age within a five-year age group, to preserve as closely as possible the five-year mortality rate after generating full life tables and re-converting to abridged life tables. We then directly added the fatal discontinuity-specific mortality rates to the mortality rates in the full life tables to regenerate full and abridged life tables with fatal discontinuities and HIV. To calculate the probability of death for the under 1 age group (1q0), we utilized

results from the under-5 age and sex pattern of mortality process (Section 2.2.14), calculated with-fatal discontinuity  $mx$  for  $enn$ ,  $l_{nn}$ , and  $p_{nn}$ , back-calculated  $qx$  for  $enn$ ,  $l_{nn}$ , and  $p_{nn}$ , and then aggregated to  $1q0$ . In addition to the granular under-1 age groups, we also used the probability of death between age 1 year and age 4 years ( $4q1$ ) generated by the age-sex model.

While the use of the same mortality rate for fatal discontinuities generally led to a directly corresponding increase in  $mx$  in the abridged life tables, there were cases where the differences in abridged mortality rate between the with- and without-fatal discontinuity life tables did not exactly match the input fatal discontinuity mortality rate. These cases were very limited, primarily occurring in age groups such as 90-94 with very high and age-variant mortality prior to the addition of fatal discontinuities, and where fatal discontinuity-specific mortality was relatively low compared to all-cause mortality. This created negligible differences between the mortality rate ( $mx$ ) from the final abridged life tables and the mortality rates calculated using the mortality envelope and population results.

#### Section 2.6.4: Age-specific deaths with discontinuities and HIV/AIDS

We produced location-, sex-, year-, and age- specific death numbers including fatal discontinuities (Supplementary Results Figure 1) from the process described in Section 2.6.3.

#### Section 2.6.5: Life tables with HIV/AIDS and fatal discontinuities

From the process described in Section 2.6.4, we produced location-, sex-, and year-specific  $5q0$  (Supplementary Results Tables 2-4 and 12-14),  $45q15$ , and life expectancy at birth (Supplementary Results Figures 2-4, Supplementary Results Tables 5-8) and age 65 (Supplementary Results Tables 9-11).

## Section 3: SDI analysis

### Section 3.1: SDI definition

The Socio-demographic Index (SDI) is a composite indicator of development status strongly correlated with health outcomes. In short, it is the geometric mean of 0 to 1 indices of total fertility rate under the age of 25 (TFU25), mean education for those aged 15 and older (EDU15+), and lag distributed income (LDI) per capita.

### Section 3.2: Development of revised SDI indicator

SDI was originally constructed for GBD 2015 using the Human Development Index (HDI) methodology, wherein a 0 to 1 index value was determined for each of the original three covariate inputs (TFR in ages 15 to 49, EDU15+, and LDI per capita) using the observed minima and maxima over the estimation period to set the scales.<sup>34</sup>

In response to feedback from collaborators and the evolution of the GBD, we have refined the indicator with each GBD cycle. For GBD 2017, in conjunction with our expanded estimation of age-specific fertility, we replaced TFR with TFU25 as one of the three component indices. The TFU25 provides a better measure of women's status in society, as it focuses on ages where childbearing disrupts the pursuit of education and entrance into the workforce. In addition, we observe that in highly developed countries the TFU25 has tended to decline consistently over time, even amidst rebounds in TFR driven by increasing fertility in

older ages. The concordance correlation coefficient between SDI using the GBD 2016 method and the updated method for GBD 2017 was 0.981.

During GBD 2016 we moved from using relative index scales to absolute scales to enhance the stability of SDI’s interpretation over time, as we noticed that the measure was highly sensitive to the addition of subnational units that tended to stretch the empirical minima and maxima.<sup>7</sup> We selected the minima and maxima of the scales by examining the relationships each of the inputs had with life expectancy at birth and under-5 mortality and identifying points of limiting returns at both high and low values, if they occurred prior to theoretical limits (e.g., a TFU25 of 0).

Thus, an index score of 0 represents the minimum level of each covariate input past which selected health outcomes can get no worse, while an index score of 1 represents the maximum level of each covariate input past which selected health outcomes cease to improve. As a composite, a location with an SDI of 0 would have a theoretical minimum level of development relevant to these health outcomes, while a location with an SDI of 1 would have a theoretical maximum level of development relevant to these health outcomes.

The final scales for GBD 2017 are summarized in table C below.

*Table C. Final SDI scales*

| Input          | Lower Bound                         | Upper Bound                |
|----------------|-------------------------------------|----------------------------|
| TFU25          | 0                                   | 3                          |
| LDI per capita | 250 USD (5.52 log USD) <sup>a</sup> | 60,000 USD (11.00 log USD) |
| EDU15+         | 0 years                             | 17 years                   |

<sup>a</sup> The minimum for the LDI scale was originally set at the theoretical limit of 0 USD, as we did not observe an asymptotic relationship between log(LDI) and  $E_0$  or  $5q_0$  at lower values of log(LDI). Empirically, however, we also did not observe an LDI below 350 USD (5.86 log USD) for the estimation period 1970-2016. In log-space, this meant that approximately half of our scale was not being utilized, compressing the observed variation in LDI and diminishing its meaningful contribution to SDI. Accordingly, we set the lower limit on LDI to 250 USD (5.52 log USD) to ensure we were fully utilizing the range of the scale to capture its variation across space and time, as is the case with the other two inputs.

Using scales described above, we computed the index scores underlying SDI as follows:

$$I_{cly} = \frac{(C_{ly} - C_{low})}{(C_{high} - C_{low})}$$

Where  $I_{cly}$  – the index for covariate  $C$ , location  $l$ , and year  $y$  – is equal to the difference between the value of that covariate in that location-year and the lower bound of the covariate divided by the difference between the upper and lower bounds for that covariate. If the values of input covariates fell outside the upper or lower bounds (e.g. LDI per capita greater than 60,000 USD), they were mapped to the respective upper or lower bounds. The index value for TFU25 was computed as  $1 - I_{TFU25ly}$ , as lower TFU25s correspond to higher levels of development, and thus higher index scores. For GBD 2017 we expanded the computation of SDI to 890 national and subnational locations spanning the time period 1950-2017.

The composite SDI was the geometric mean of these three indices for a given location-year. The cutoff values used to determine quintiles for analysis were then computed using country-level estimates of SDI

for the year 2017, excluding countries with populations less than 1 million. SDI groupings by geography are provided in Appendix Table 8; SDI values by location are provided in Appendix Tables 9-11.

### Example Calculation

Below we present the calculation of SDI for a hypothetical country in the year 2010

$$TFU25 = 1.09; \text{Mean educ yrs pc} = 8.23; \ln LDI = 9.60$$

$$I_{TFU25} = 1 - \frac{1.09 - 0}{3 - 0} = .637$$

$$I_{Educ} = \frac{8.23 - 0}{17 - 0} = .484$$

$$I_{\ln LDI} = \frac{9.60 - 5.52}{11.00 - 5.52} = .744$$

$$SDI = \sqrt[3]{I_{TFU25} * I_{Educ} * I_{\ln LDI}} = \sqrt[3]{.637 * .484 * .744} = .611$$

## Section 4: Fatal Discontinuities Estimation

### Section 4.1: Input data

Input data for fatal discontinuities were compiled from a range of sources, including country VR data; international databases that captured several cause-specific fatal discontinuities; and supplemental data in the presence of known issues with data quality, representativeness, or time lags in reporting. Below we provide more detail on the different input data sources by sub-causes of fatal discontinuities.

#### Subnational locations and population splitting

In locations where we produced estimates at the subnational level for GBD 2017, deaths due to all fatal discontinuity causes were assigned to the relevant subnational location(s) when that information could be obtained either through country data sources (e.g., VR) or through additional online research. In the rare case that no subnational location could be found, the deaths were split proportionally by population across all subnational locations.

In locations that have experienced boundary changes or split from other locations that we currently estimate (e.g., the former Yugoslavia, Czechoslovakia, the Soviet Union, Sudan and South Sudan), we split deaths due to events that occurred prior to boundary changes proportionally based on the populations residing within the boundaries of present-day locations unless we found documentation that clearly indicated whether the event and corresponding deaths occurred in one of the present-day GBD 2017 locations.

### *Choosing between multiple sources for same event*

Where multiple sources reported shock deaths for the same location-year-cause, a cause-specific prioritization scheme was followed that reflected the available detail in the cause-specific datasets. For example, the Generalized Event Dataset from UCDP was prioritized above all other non-VR sources because it included detail on how deaths were distributed between multiple actors and locations in each conflict event.<sup>35</sup> In most cases, VR from 4- or 5-star locations (based on the GBD 2017 cause of death star-rating data quality system) was used where available.<sup>32</sup> In some cases, VR from 4- or 5-star locations was not chosen if there were well-known data quality issues or discrepancies in the cause of death data reporting related to a particular event (e.g., supplemental death data for Louisiana was used for Hurricane Katrina because of established data reporting issues). The process for prioritization among various sources for location-year fatal discontinuities is described more in the Modelling strategy below.

Major data sources other than country vital registration for each fatal discontinuity cause follow.

### *Conflict and terrorism*

In GBD 2016, data for conflict and terrorism came from the Uppsala Conflict Data Program (UCDP), International Institute for Strategic Studies, and Robert S. Strauss Center for International Security and Law. For GBD 2017, data from the Global Terrorism Database (GTD), the University of Chicago Suicide Attack Database, and the RAND Database of Worldwide Terrorism Incidents were used in addition to those used in GBD 2016. The table below provides details about the various datasets we utilized from these sources, the dates they were last accessed, and the years for which we used the data provided. Where these data sources reported deaths due to gang violence, the cause was re-mapped to Physical violence by other means. Where these data sources reported deaths due to legal intervention, the cause was re-mapped to Executions and police conflict.

Table D.

| Data source name                                                      | Date accessed | Years of data downloaded | Type of data included                                                                                                                                                                                                                                                |
|-----------------------------------------------------------------------|---------------|--------------------------|----------------------------------------------------------------------------------------------------------------------------------------------------------------------------------------------------------------------------------------------------------------------|
| <b>Uppsala Conflict Data Program<sup>1</sup></b>                      |               |                          |                                                                                                                                                                                                                                                                      |
| Georeferenced Event Dataset, Version 17.1                             | 1/16/2018     | 1989-2015                | UCDP battles, non-state, and one-sided conflict deaths with the most disaggregated location information available                                                                                                                                                    |
| PRIO Battles Deaths Dataset, Version 3.1                              | 1/16/2018     | 1970-1988                | Armed conflict (civil wars, etc.)                                                                                                                                                                                                                                    |
| <b>International Institute for Strategic Studies</b>                  |               |                          |                                                                                                                                                                                                                                                                      |
| Armed Conflict Dataset                                                | 11/17/2016    | 1997-2016                | Insurgency, Inter-state, Intra-state conflict deaths                                                                                                                                                                                                                 |
| <b>Robert S. Strauss Center For International Security And Law</b>    |               |                          |                                                                                                                                                                                                                                                                      |
| Armed Conflict Location and Event Dataset (ACLED)                     | 6/21/2018     | 1997-2017                | Actions of opposition groups, governments, and militias in selected locations in Africa, Asia, and the Middle East specifying the exact location and date of battle events, transfers of military control, headquarter establishment, civilian violence, and rioting |
| Social Conflict Analysis Database (SCAD)                              | 1/16/2018     | 1990-2016                | Protests, riots, strikes, inter-communal conflict, government violence against civilians, and other forms of social conflict (covers Africa, Latin America, and Asia)                                                                                                |
| <b>University of Maryland, Global Terrorism Database</b>              |               |                          |                                                                                                                                                                                                                                                                      |
| Global Terrorism Database (GTD)                                       | 1/16/2018     | 1970-2016                | Attacks aimed at attaining political, economic, religious, or social goal, includes evidence of intention to coerce, action was outside precepts of International Humanitarian Law.                                                                                  |
| <b>University of Chicago, Chicago Project on Security and Threats</b> |               |                          |                                                                                                                                                                                                                                                                      |
| Suicide Attack Database (CPOST SAD)                                   | 8/5/2017      | 1974-2016                | Attacks in which an attacker kills him/herself in a deliberate attempt to kill others, includes only attacks perpetrated by non-state actors                                                                                                                         |
| <b>RAND National Security Research Division</b>                       |               |                          |                                                                                                                                                                                                                                                                      |
| RAND Database of Worldwide Terrorism Incidents                        | 9/8/2017      | 1968-2009                | Terrorism, defined by the nature of the act, not by the identity of the perpetrators or the nature of the cause; including violence, calculated to create fear/alarm, intended to coerce certain actions, motive is political, group or individual                   |

Supplemental online research was conducted for recent conflicts where the databases above were not up-to-date. In addition, deaths due to conflict and terrorism in Iraq from 2003 to present were estimated using a combination of supplemental sources. The source found with the lowest number of deaths, Iraq Body Count (IBC)<sup>36</sup>, was used as the lower bound of the uncertainty interval from 2003 to 2016. Estimates from the Iraq Mortality Study (IMS) by Hagopian et al<sup>37</sup> from 2003 to 2006, the deadliest years of the war, were used to scale deaths to generate the upper uncertainty interval limits using the following formula:

$$deaths_{GBD\ 2016,\ high} = deaths_{IBC} \cdot \left[ \frac{deaths_{IMS}}{deaths_{IBC}} \right]_{2003-2006}$$

We used the average ratio between IMS and IBC reported deaths between 2003 and 2006, multiplied by the number of deaths reported by the IBC. This high estimate is carried forward through 2017 under the assumption that the IBC similarly undercounts the number of deaths due to the ongoing civil war in Iraq. The final, best estimate for conflict and terrorism deaths in Iraq from 2003 to 2016 is the midpoint of the high and low estimates given above.

We identified four major conflicts that were not represented in these databases: 1997 civil conflict in Albania<sup>38</sup>; 1971 genocide in Bangladesh<sup>39</sup>; 1972 genocide in Burundi<sup>40</sup>; and 1993 genocide in Burundi<sup>40</sup>. In these cases, we used literature sources in order to account for these fatal discontinuities.

For country-years where multiple sources provided estimates, we prioritized sources in the following order: (1) country VR data, if death estimates were highest of all sources; (2) UCDP; (3) IISS; (4) country VR if death estimates were not the highest of all sources; (5) Robert Strauss Center; (6) Global Terrorism DB; (7) CPOST Suicide Attack Database; (8) online supplemental research.

### *Exposure to forces of nature, other injury causes, and protein-energy malnutrition*

The Centre for Research on the Epidemiology of Disasters' International Disaster Database (EM-DAT) served as the primary non-VR source of fatal discontinuities due to exposure to forces of nature (i.e., natural disasters); other transport injuries (eg, plane, train, and boat accidents); poisonings; fire, heat, and hot substances; other exposure to mechanical forces (eg, building collapse); and protein-energy malnutrition (ie, famine or severe drought). Data from EM-DAT were last accessed February 14, 2018. Supplemental online research was conducted for events where EM-DAT was not up-to-date.

For country-years where multiple sources provided estimates, we prioritized sources in the following order: (1) country VR data, if data quality rating was 4 or 5 stars; (2) country VR data if data quality rating was less than 4 stars and death estimates were highest of all sources; (3) EM-DAT; (4) online supplemental research. Exceptions were made when it was clear that VR systems had been compromised by the event being measured.

### *Meningococcal meningitis and diarrheal diseases*

For GBD 2017, we included fatal discontinuities due to a subset of infectious diseases: meningococcal meningitis (or meningococcal infection) and diarrheal disease caused by cholera. These two infectious diseases were first included on the fatal discontinuity cause list for GBD 2016 because (1) their current

modelling strategies with the Cause of Death Ensemble model (CODEm) does not optimally capture the potentially highly variable – or epidemic – mortality levels and trends characteristic of these two causes; and (2) they can contribute to significant total fatalities in a given location-year. Other infectious diseases for which the latter is true – high death rates in the presence of an outbreak or epidemic – are currently modelled with alternative cause of death methods (eg, natural history models for measles and yellow fever), which allow for greater variation year-over-year if or when outbreaks occur. In future iterations of the GBD, we plan to revisit the inclusion criteria for infectious diseases as fatal discontinuities and develop more of an ensemble approach to modelling causes that can be both endemic (and thus result in more uniform levels and trends over time) and epidemic (and subsequently lead to rapid increases – and decreases – in deaths for a given location-year).

The Global Infectious Diseases and Epidemiology Network (GIDEON) served as the primary data source for collating cholera, meningococcal meningitis, and meningococcal infection death reports.<sup>41,42</sup> For any year in which cholera or meningococcal meningitis deaths were recorded in a country or territory covered by the GBD, we directly extracted reported deaths from 1970 to 2016. When there were reporting gaps in cholera or meningococcal meningitis deaths over this period of time and the WHO annual cholera or meningitis reports included death reports for those years, the WHO reports were utilized. The primary exception were two major cholera outbreaks in Bangladesh – 1982-1983 and 1991 – which were not captured by either GIDEON or WHO. As result, we used the EM-DAT records for the 1982-1983 outbreak and literature for the 1991 outbreak.<sup>32</sup> For the Yemen Cholera outbreak in 2016 and 2017, we used estimates from local collaborators in the absence of other data sources.

### *Ebola*

Since GBD 2015, outbreaks due to Ebola virus disease have been estimated using the data and methods described in the appendix of the GBD 2017 cause of death capstone and included in GBD death estimates in the same way as other fatal discontinuity causes.<sup>32</sup>

## Section 4.2: Modeling strategy

All input data for fatal discontinuity causes were run through the cause of death data formatting and mapping process.<sup>32</sup>

### *VR de-duplication*

For injury causes that also have continuous background mortality and a CODEm model, a process was established to avoid duplication of fatal discontinuity deaths in the two models. First, location-years with fatal discontinuities data from non-VR sources were identified. If these location-cause-years also had VR death estimates that were greater than 40% higher than the immediately surrounding years and could be linked to a specific fatal discontinuity event, these years were marked as outliers in the VR data and the difference between the outlier year and the average of the surrounding years was included in the relevant cause in the fatal discontinuities database. The deaths from the identified events were subtracted from the all-cause VR estimates used in the all-cause mortality estimation process.



### *Uncertainty analysis for input and draw-level input to age-sex splitting*

Uncertainty intervals for deaths due to conflict and terrorism were generated using UCDP high and low death estimates, except in the case of Iraq 2003-2016, as explained above. In cases where low and high estimates were not included in the available data, the regional average uncertainty interval was applied to the available death estimate across all fatal discontinuity causes.

We assumed a log-normal distribution using mean death rates and standard error based on high and low estimates. In the case that standard error was less than  $10e-8$ , the draws were set equal to the mean rate. 1,000 draws were sampled from this log-normal distribution. These 1,000 draws were then converted back to count space and used for final calculations of means and uncertainty intervals.

### *Age-sex splitting*

All compiled data were run through the causes of death age-sex splitting process, except for where we had strong supplemental information on the age distribution of specific, large events, such as United States mortality in the Vietnam War and Iranian mortality from the Iran-Iraq conflict in the early 1980s.<sup>32</sup>

### *Changes from GBD 2016*

GBD 2017 saw an effort to systematize the collection of up-to-date fatal discontinuity data through supplemental online research. New tools included use of Twitter to identify events not covered by other sources, most notably in identifying events that occurred recently (2016, 2017). This process resulted in a more comprehensive set of conflict and terrorism data for 2017, as well as large natural disasters not contained in EM-DAT or VR.

For GBD 2017, efforts were also made to improve location tagging in raw data to the GBD location hierarchy using several approaches. Identifying the correct GBD location for each event is difficult, as reports of fatal discontinuities come in many formats, often with limited metadata. The approaches used for improving the location tagging included a) utilizing the collaborator network to more accurately tag events to subnational locations when information in the data was scarce, b) automated matching with GBD location names, c) overlaying a spatial file of the most-detailed GBD geographies, d) geo-coding using precise place names, and e) for events spanning multiple GBD locations, but without detail in the raw data, deaths were split using population.

We completed a detailed review of the fatal discontinuity cause mappings for conflict and terrorism, police conflict and executions, using the text descriptions of each event when provided in the data. This exercise resulted in updating the GBD cause assigned for a number of events present in the GBD 2016 analysis, which is one contributor in the differences seen in the GBD 2016 and GBD 2017 fatal discontinuity estimates.

## Section 5: Additional Methods Information

### Section 5.1: GBD world population age standard

Age-standardized populations in the GBD were calculated using the GBD world population age standard. For GBD 2013, GBD 2015 and GBD 2016, the age-specific proportional distributions of all national

locations from the UNPOP World Population Prospects 2012 revision for all years from 2010 to 2035 were used to generate a standard population age structure using the non-weighted mean across all the aforementioned country-years. For GBD 2017 we have used the non-weighted mean of 2017 age-specific proportional distributions from the GBD 2017 population estimates for all national locations with a population greater than 5 million people in 2017 to generate an updated standard population age structure.<sup>1</sup> The values used for the age standard are found in Appendix Table 12.

## Section 5.2: Estimating correlation

For the estimation of correlation, we used the Pearson correlation coefficient as estimated by Stata version 14, which uses the following function<sup>43</sup>:

$$\hat{\rho} = \frac{\sum_{i=1}^n w_i (x_i - \bar{x})(y_i - \bar{y})}{\sqrt{\sum_{i=1}^n w_i (x_i - \bar{x})^2} \sqrt{\sum_{i=1}^n w_i (y_i - \bar{y})^2}}$$

Where

$w_i$  are the weights, if specified, or  $w_i = 1$  if weights are not specified

$\bar{x} = (\sum w_i x_i) / (\sum w_i)$  is the mean of  $x$

$\bar{y}$  is similarly defined

## Section 5.3: Calculating annualised rates of change

We calculated annualized rates of change by taking the log of 5q0 in a target year, represented as  $y + t$ , divided by the 5q0 at the baseline year  $y$ , and divided by the difference in years between the target and baseline years, represented as  $t$ .

$$aroc_{5q_0} = \frac{\ln\left(\frac{5q_0_{y+t}}{5q_0_y}\right)}{t}$$

## Section 5.4: Gross domestic product (GDP) and lagged dependent income (LDI)

Gross domestic product (GDP) per capita is based upon four commonly used GDP per capita series, World Bank World Development Indicators, International Monetary Fund World Economic Outlook report, Angus Maddison's research homepage at the University of Groningen Department of Economics, and the University of Pennsylvania (Penn) Center for International Comparisons of Production, Income, and Prices. Each of the four series are imputed separately using growth regressions and then averaged to create a unified IHME GDP per capita series. Wherever we had missing data across all series for a country, we used mixed effects regression with region-specific random effects to interpolate or extrapolate those missing observations. These methods have been previously described in James et al.<sup>44</sup>

Lagged dependent income (LDI) per capita is a moving average transformation of GDP per capita. We computed a 10 year lagged average of GDP to create LDI with the following formula:

$$LDI_{pc,t} = \frac{1}{5.5} \left( GDPpc_t + \sum_{i=1}^9 GDPpc_{t-i} \cdot \left(1 - \frac{i}{10}\right) \right)$$

where LDI at time  $t$  is a function of current GDP (at  $t$ ) and the previous 9 years of GDP with an inverse moving weight, and a normalization factor (sum of all the weights).

## Section 5.5: Calculation of educational attainment covariate

Estimates of average years of education were based on a compilation of 2,522 censuses and household surveys. These data and the methods hereafter build on an approach used to produce a previously published dataset of international educational attainment.<sup>45,46</sup> Each data source included information on the distribution of educational attainment by country, year, sex, and five- or 10-year age group. Where years of schooling data were available only for multi-year bins, eg, the fraction of the population with between 6 and 9 years of completed education, we utilised a database of 1,792 sources reporting single years of completed schooling to split these binned data into single-year distributions from 0 to 18 years based on the average of the 12 closest distributions in terms of geographic proximity and year. From each of the subsequent data sources, we calculated the mean years of schooling by age and sex.

In the next step, age-cohort imputation was used to project observed cohorts through time, exploiting the relative constancy of education levels after age 25. For any data point representing a cohort aged 25 or older, we extrapolated the data forward and backward so that it was represented in all year-age combinations for that cohort. For example, a data point reflecting a cohort aged 35-39 in 2000 was projected forward for 40- to 44-year-olds in 2005, 45- to 49-year-olds in 2010, and so on. It was also projected backward for 30- to 34-year-olds in 1995 and 25- to 29-year-olds in 1990. Post-imputation, age-period models were fit on all original input data, as well as the imputed cohort data, in order to estimate a complete single-year series of educational attainment from 1950 through 2016 by age, sex, and location. Separately for each sex and GBD region, the mean level of educational attainment of the country-age-year-specific population,  $Edu_{c,a,s,t}$ , was estimated as:

$$\text{logit} \left( \frac{Edu_{c,a,s,t}}{Edu_{max_a}} \right) = \beta_{s,r} Year + \delta_{s,r} Age + I_{s,r} + \alpha_{c,s},$$

where:

$Edu_{max_a}$  is the maximum mean educational attainment for each age group, defined as 3 for ages 5-9, 8 for ages 10-14, 13 for ages 15-19, and 18 for all age groups 20-24 and up;

$\beta_{s,r}$  is a sex- and region-specific intercept;

$\delta_{s,r}$  captures the linear secular trend for each sex and region;

$I_{s,r}$  is a natural spline on age to capture the non-linear age pattern by sex and region, with knots at 15 and 25 years of age; and

$\alpha_{c,s}$  is a country-sex-specific random intercept.

Finally, Gaussian process regression (GPR) was used to smooth the residuals from the age-period model, accounting for uncertainty in each data point. GPR also synthesises both data and model uncertainty to estimate uncertainty intervals.

## Section 6: References

- 1 GBD 2017 Population and Fertility collaborators. Population and fertility by age and sex for 195 countries and territories 1950-2017: a systematic analysis for the Global Burden of Disease 2017. *The Lancet* in review.
- 2 Rajaratnam JK, Tran LN, Lopez AD, Murray CJL. Measuring Under-Five Mortality: Validation of New Low-Cost Methods. *PLOS Med* 2010; **7**: e1000253.
- 3 Wang H, Liddell CA, Coates MM, *et al.* Global, regional, and national levels of neonatal, infant, and under-5 mortality during 1990–2013: a systematic analysis for the Global Burden of Disease Study 2013. *The Lancet* 2014; **384**: 957–79.
- 4 Murray CJ, Ezzati M, Flaxman AD, *et al.* GBD 2010: design, definitions, and metrics. *The Lancet* 2012; **380**: 2063–6.
- 5 Wang H, Dwyer-Lindgren L, Lofgren KT, *et al.* Age-specific and sex-specific mortality in 187 countries, 1970–2010: a systematic analysis for the Global Burden of Disease Study 2010. *The Lancet* 2012; **380**: 2071–94.
- 6 Wang H, Bhutta ZA, Coates MM, *et al.* Global, regional, national, and selected subnational levels of stillbirths, neonatal, infant, and under-5 mortality, 1980–2015: a systematic analysis for the Global Burden of Disease Study 2015. *The Lancet* 2016; **388**: 1725–74.
- 7 Wang H, Abajobir AA, Abate KH, *et al.* Global, regional, and national under-5 mortality, adult mortality, age-specific mortality, and life expectancy, 1970–2016: a systematic analysis for the Global Burden of Disease Study 2016. *The Lancet* 2017; **390**: 1084–150.
- 8 Gelman A, Carlin JB, Stern HS, Rubin DB. Bayesian Data Analysis, Second Edition, 2 edition. Boca Raton, Fla: Chapman and Hall/CRC, 2003.
- 9 Gompertz B. On one Uniform Law of Mortality from Birth to extreme Old Age, and on the Law of Sickness. *J Inst Actuar Assur Mag* 1871; **16**: 329–44.
- 10 The UN Inter-agency Group for Child Mortality Estimation. Child Mortality Estimates. <http://www.childmortality.org/> (accessed May 20, 2017).
- 11 Bradshaw D, Dorrington R. Child mortality in South Africa - we have lost touch. *S Afr Med J* 2007; **97**: 582.

- 12 Kerber KJ, Lawn JE, Johnson LF, *et al.* South African child deaths 1990-2011: have HIV services reversed the trend enough to meet Millennium Development Goal 4? *AIDS Lond Engl* 2013; **27**: 2637–48.
- 13 Kim H-Y, Kasonde P, Mwiya M, *et al.* Pregnancy loss and role of infant HIV status on perinatal mortality among HIV-infected women. *BMC Pediatr* 2012; **12**: 138.
- 14 Brocklehurst P, French R. The association between maternal HIV infection and perinatal outcome: a systematic review of the literature and meta-analysis. *Br J Obstet Gynaecol* 1998; **105**: 836–48.
- 15 Hill K. Estimating census and death registration completeness. *Asian Pac Popul Forum* 1987; **1**: 8–13, 23–4.
- 16 Bennett NG, Horiuchi S. Estimating the Completeness of Death Registration in a Closed Population. *Popul Index* 1981; **47**: 207–21.
- 17 Brass W, Coale AJ. Methods of Analysis and Estimation. In: *Mathematical Demography*. Springer Berlin Heidelberg, 1977: 307–13.
- 18 Preston SH. The changing relation between mortality and level of economic development. *Popul Stud* 1975; **29**: 231–248.
- 19 Preston S, Coale AJ, Trussell J, Weinstein M. Estimating the Completeness of Reporting of Adult Deaths in Populations That Are Approximately Stable. *Popul Index* 1980; **46**: 179–202.
- 20 Murray CJL, Rajaratnam JK, Marcus J, Laakso T, Lopez AD. What Can We Conclude from Death Registration? Improved Methods for Evaluating Completeness. *PLOS Med* 2010; **7**: e1000262.
- 21 Obermeyer Z, Rajaratnam JK, Park CH, *et al.* Measuring Adult Mortality Using Sibling Survival: A New Analytical Method and New Results for 44 Countries, 1974–2006. *PLOS Med* 2010; **7**: e1000260.
- 22 Gakidou E, King G. Death by survey: estimating adult mortality without selection bias from sibling survival data. *Demography* 2006; **43**: 569–585.
- 23 Masquelier B. Adult mortality from sibling survival data: a reappraisal of selection biases. *Demography* 2013; **50**: 207–28.
- 24 Rogers RG, Crimmins EM, editors. *International Handbook of Adult Mortality*. <http://www.springer.com/gp/book/9789048199952> (accessed May 20, 2017).
- 25 Murray CJ, Ezzati M, Flaxman AD, *et al.* GBD 2010: design, definitions, and metrics. *The Lancet* 2012; **380**: 2063–6.

- 26 Murray CJL, Ferguson BD, Lopez AD, Guillot M, Salomon JA, Ahmad O. Modified Logit Life Table System: Principles, Empirical Validation, and Application. *Popul Stud* 2003; **57**: 165–82.
- 27 Thatcher AR. The long-term pattern of adult mortality and the highest attained age. *J R Stat Soc Ser A Stat Soc* 1999; **162**: 5–43.
- 28 Shkolnikov V, Barbieri M, Wilmoth J. Human Mortality Database. <http://www.mortality.org/> (accessed May 20, 2017).
- 29 King G, Tomz M, Wittenberg J. Making the Most of Statistical Analyses: Improving Interpretation and Presentation. *Am J Polit Sci* 2000; **44**: 341–355.
- 30 Mahy M, Penazzato M, Ciaranello A, *et al.* Improving estimates of children living with HIV from the Spectrum AIDS Impact Model. *Aids* 2017; **31**: S13–S22.
- 31 Eaton J. epp: Implementation of EPP model for HIV epidemic estimates. 2018 <https://github.com/jeffeaton/epp> (accessed July 13, 2018).
- 32 GBD 2017 Causes of Death Collaborators. Global, regional, and national age-sex-specific mortality for 282 causes of death, 1980–2017: a systematic analysis for the Global Burden of Disease Study 2017. *The Lancet* in review.
- 33 Wang H, Wolock TM, Carter A, *et al.* Estimates of global, regional, and national incidence, prevalence, and mortality of HIV, 1980–2015: the Global Burden of Disease Study 2015. *Lancet HIV* 2016; **3**: e361–87.
- 34 Wang H, Naghavi M, Allen C, *et al.* Global, regional, and national life expectancy, all-cause mortality, and cause-specific mortality for 249 causes of death, 1980–2015: a systematic analysis for the Global Burden of Disease Study 2015. *The Lancet* 2016; **388**: 1459–544.
- 35 Department of Peace and Conflict Research, Uppsala University. UCDP Georeferenced Event Dataset, Version 17.1, 2016. Uppsala, Sweden: Department of Peace and Conflict Research, Uppsala University, 2017. .
- 36 Iraq Body Count. <https://www.iraqbodycount.org/database/> (accessed May 8, 2017).
- 37 Hagopian A, Flaxman AD, Takaro TK, *et al.* Mortality in Iraq Associated with the 2003–2011 War and Occupation: Findings from a National Cluster Sample Survey by the University Collaborative Iraq Mortality Study. *PLOS Med* 2013; **10**: e1001533.
- 38 Jarvis C. The Rise and Fall of Albania’s Pyramid Schemes. *Finance Dev* 2000; **37**. <http://www.imf.org/external/pubs/ft/fandd/2000/03/jarvis.htm>.
- 39 Obermeyer Z, Murray CJL, Gakidou E. Fifty years of violent war deaths from Vietnam to Bosnia: analysis of data from the world health survey programme. *BMJ* 2008; **336**: 1482–6.

- 40 Milton L. Rwanda, 1994: International incompetence produces genocide. 1994  
<https://ezproxy.uwc.edu/login?url=http://search.proquest.com/docview/234405747?accountid=42411>.
- 41 Inc GI, Berger DS. Cholera: Global Status: 2017 edition. GIDEON Informatics Inc, 2017.
- 42 Inc GI, Berger DS. Bacterial Meningitis: Global Status: 2017 edition. GIDEON Informatics Inc, 2017.
- 43 Functions Reference Manual. 2015. <http://www.stata.com/manuals13/rcorrelate.pdf> (accessed May 17, 2017).
- 44 James SL, Gubbins P, Murray CJ, Gakidou E. Developing a comprehensive time series of GDP per capita for 210 countries from 1950 to 2015. *Popul Health Metr* 2012; **10**: 12.
- 45 Gakidou E, Cowling K, Lozano R, Murray CJL. Increased educational attainment and its effect on child mortality in 175 countries between 1970 and 2009: a systematic analysis. *Lancet Lond Engl* 2010; **376**: 959–74.
- 46 Preston SH. The changing relation between mortality and level of economic development. *Int J Epidemiol* 2007; **36**: 484–90.

Appendix Figure 1. Analytical flowchart for the estimation of all-cause mortality by age and sex and HIV/AIDS incidence, prevalence, and mortality for GBD 2017.

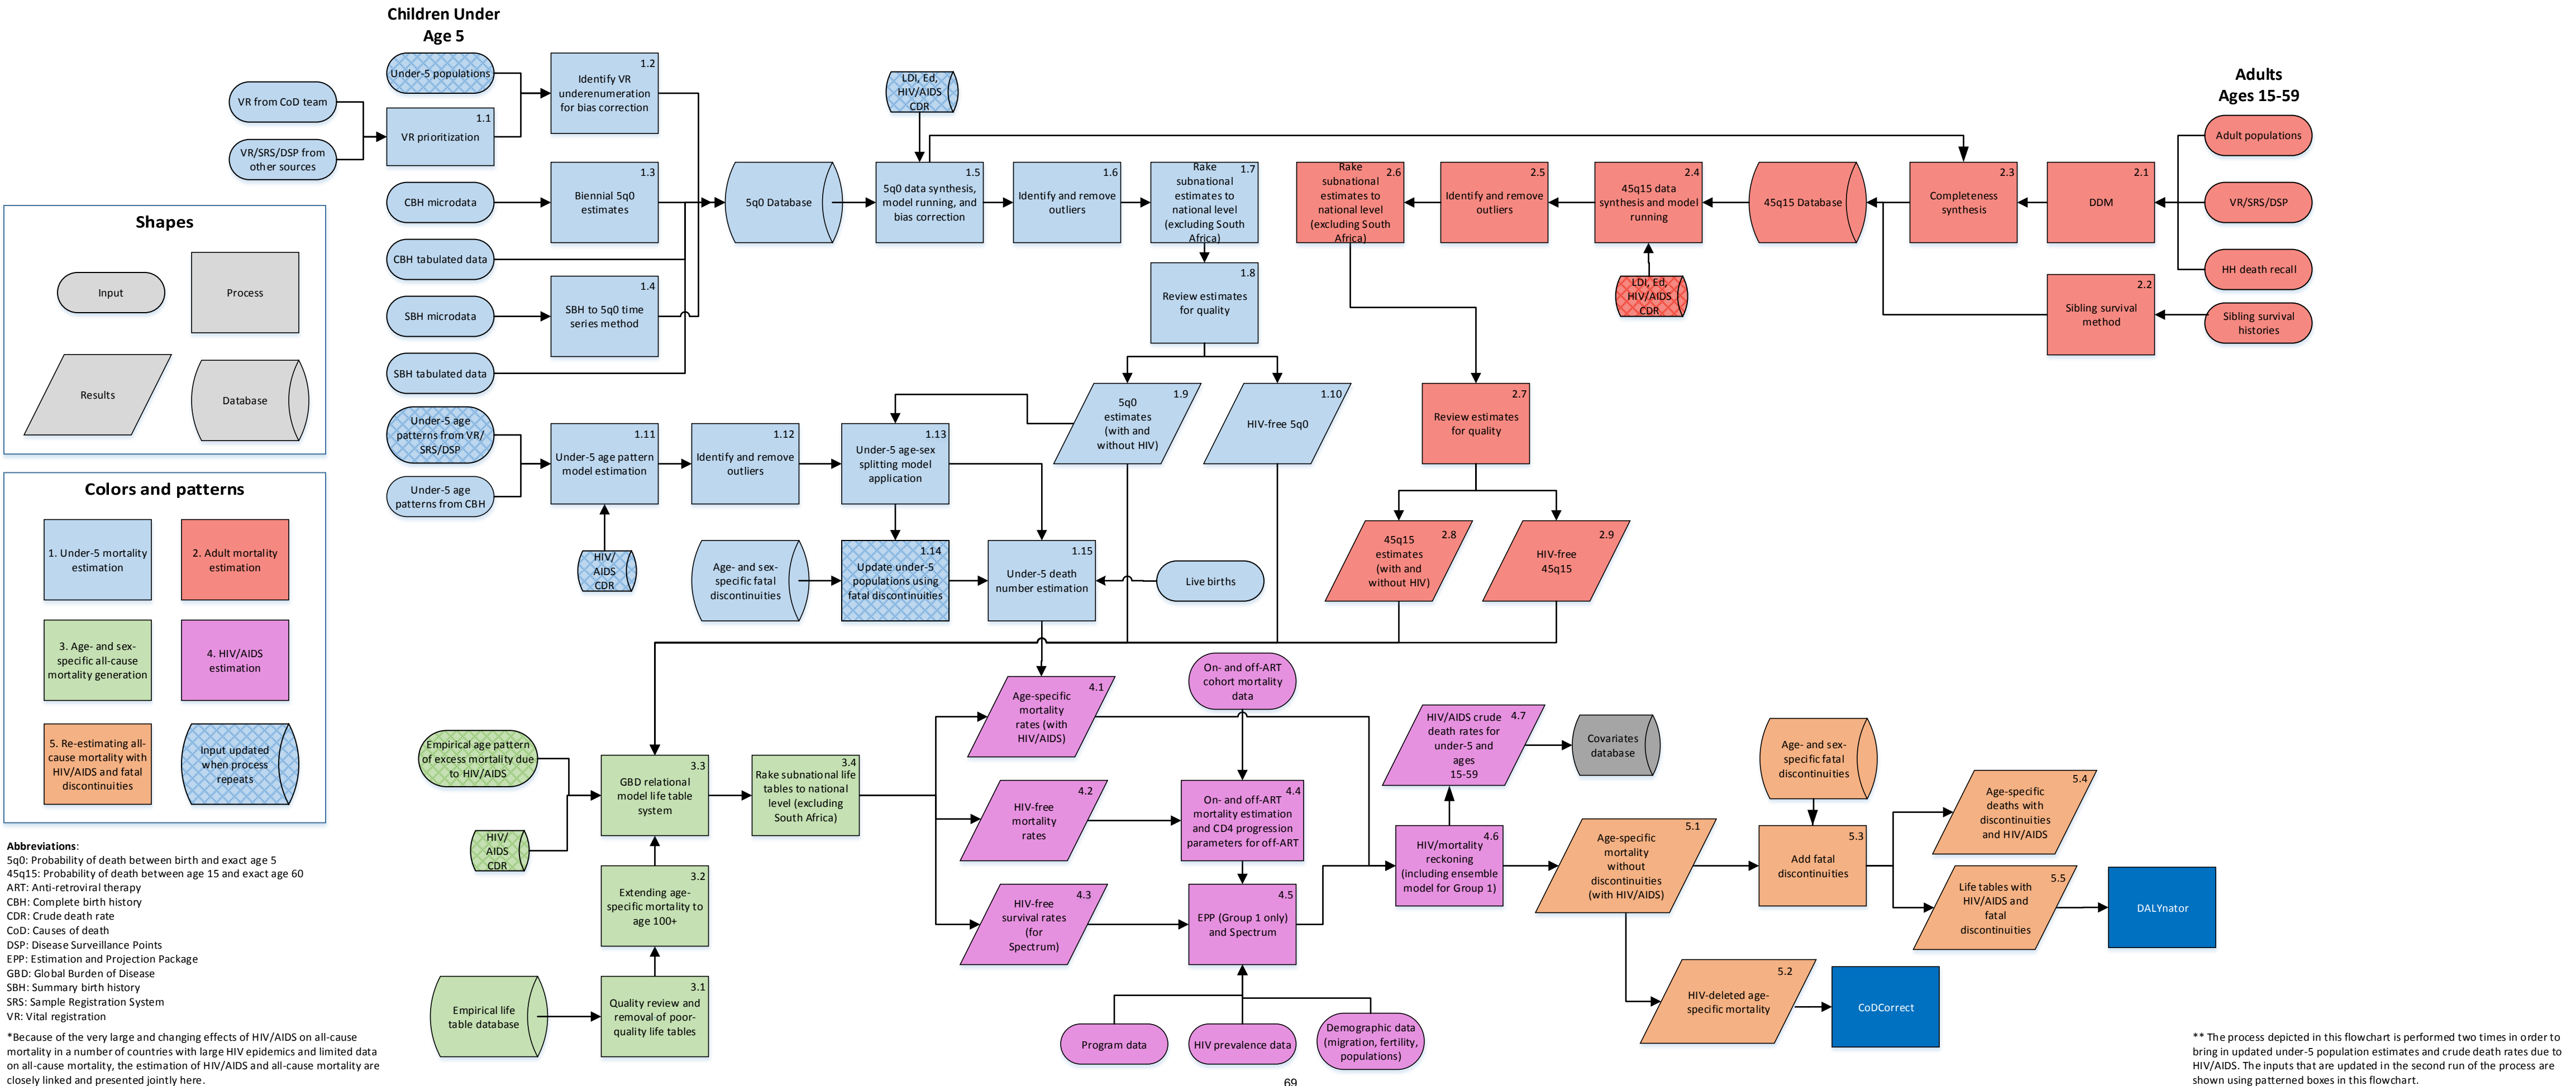



Appendix Figure 2. Estimated completeness of under-5 death registration, 1950–2017.

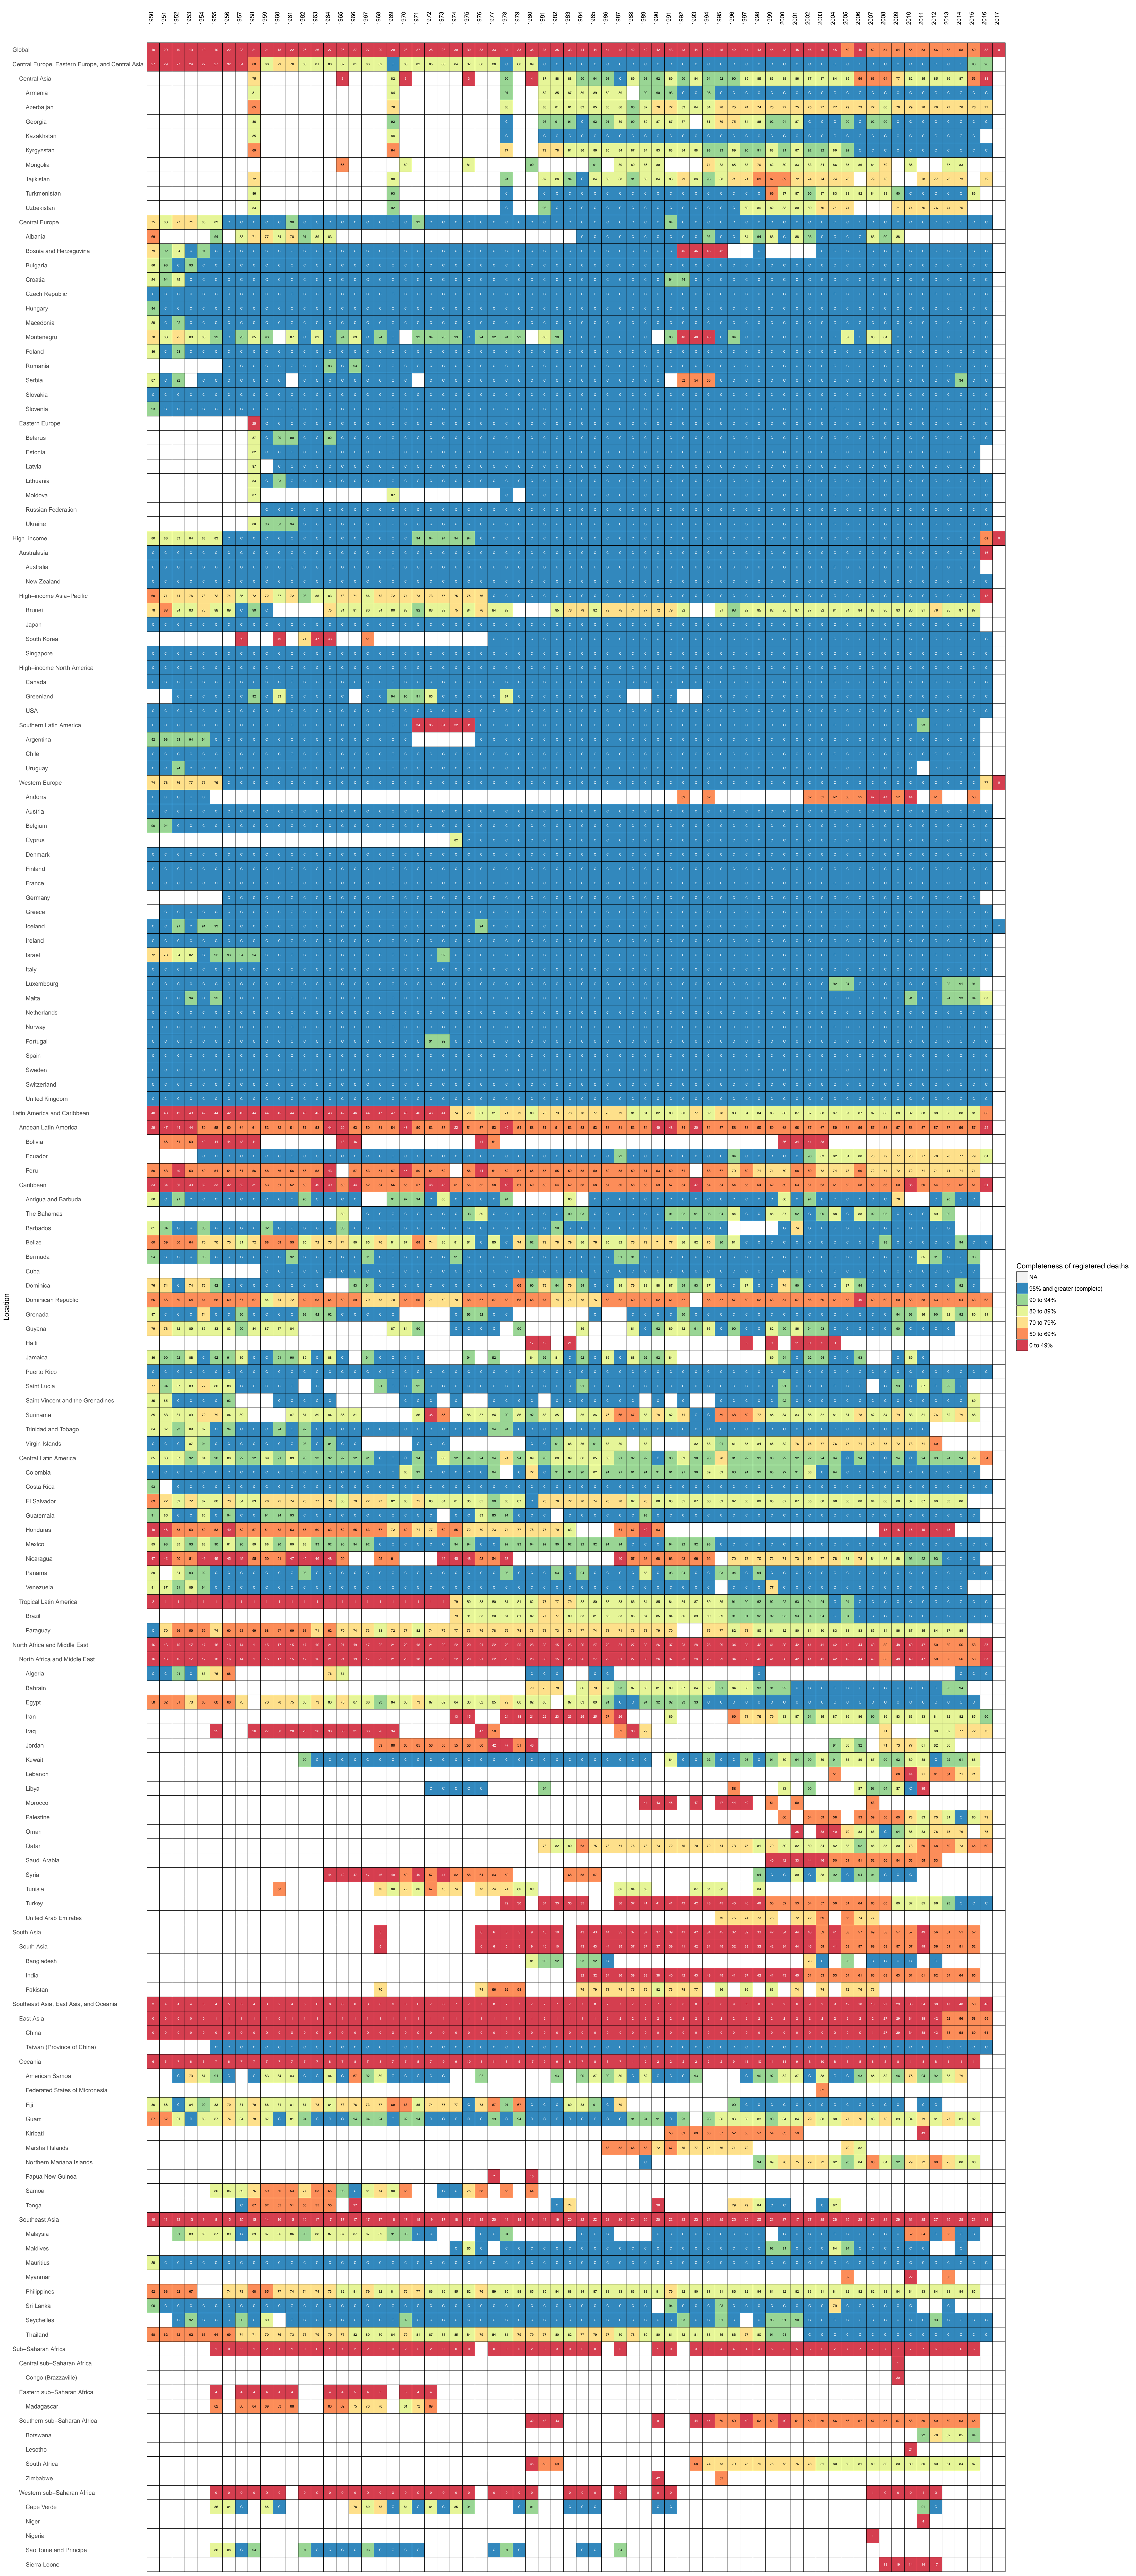

Appendix Table 1. GATHER checklist of information that should be included in reports of global health estimates, with description of compliance and location of information for GBD 2017 [Global, regional, and national under-5 mortality, adult mortality, age-specific mortality, and life expectancy, 1950-2017: a systematic analysis for the Global Burden of Disease Study 2017].

| #                                                                                                     | GATHER checklist item                                                                                                                                                                                                                                                                                                                         | Description of compliance                                                                                                                  | Reference                                                                                                           |
|-------------------------------------------------------------------------------------------------------|-----------------------------------------------------------------------------------------------------------------------------------------------------------------------------------------------------------------------------------------------------------------------------------------------------------------------------------------------|--------------------------------------------------------------------------------------------------------------------------------------------|---------------------------------------------------------------------------------------------------------------------|
| <b>Objectives and funding</b>                                                                         |                                                                                                                                                                                                                                                                                                                                               |                                                                                                                                            |                                                                                                                     |
| 1                                                                                                     | Define the indicators, populations, and time periods for which estimates were made.                                                                                                                                                                                                                                                           | Narrative provided in paper and methods appendix describing indicators, definitions, and populations                                       | Main text (Methods) and methods appendix                                                                            |
| 2                                                                                                     | List the funding sources for the work.                                                                                                                                                                                                                                                                                                        | Funding sources listed in paper                                                                                                            | Main text (Summary)                                                                                                 |
| <b>Data Inputs</b>                                                                                    |                                                                                                                                                                                                                                                                                                                                               |                                                                                                                                            |                                                                                                                     |
| <i>For all data inputs from multiple sources that are synthesized as part of the study:</i>           |                                                                                                                                                                                                                                                                                                                                               |                                                                                                                                            |                                                                                                                     |
| 3                                                                                                     | Describe how the data were identified and how the data were accessed.                                                                                                                                                                                                                                                                         | Narrative provided in paper and methods appendix describing data seeking methods                                                           | Main text (Methods) and methods appendix                                                                            |
| 4                                                                                                     | Specify the inclusion and exclusion criteria. Identify all ad-hoc exclusions.                                                                                                                                                                                                                                                                 | Narrative provided in paper and methods appendix describing inclusion and exclusion criteria by data type                                  | Main text (Methods) and methods appendix                                                                            |
| 5                                                                                                     | Provide information on all included data sources and their main characteristics. For each data source used, report reference information or contact name/institution, population represented, data collection method, year(s) of data collection, sex and age range, diagnostic criteria or measurement method, and sample size, as relevant. | Metadata for data sources by component, geography, cause, risk, or impairment is available through an interactive, online data source tool | Online data citation tool<br><a href="http://ghdx.healthdata.org/gbd-2017">http://ghdx.healthdata.org/gbd-2017</a>  |
| 6                                                                                                     | Identify and describe any categories of input data that have potentially important biases (e.g., based on characteristics listed in item 5).                                                                                                                                                                                                  | Summary of known biases by cause included in methods appendix                                                                              | Methods appendix                                                                                                    |
| <i>For data inputs that contribute to the analysis but were not synthesized as part of the study:</i> |                                                                                                                                                                                                                                                                                                                                               |                                                                                                                                            |                                                                                                                     |
| 7                                                                                                     | Describe and give sources for any other data inputs.                                                                                                                                                                                                                                                                                          | Included in online data source tool                                                                                                        | Online data citation tool:<br><a href="http://ghdx.healthdata.org/gbd-2017">http://ghdx.healthdata.org/gbd-2017</a> |
| <i>For all data inputs:</i>                                                                           |                                                                                                                                                                                                                                                                                                                                               |                                                                                                                                            |                                                                                                                     |
| 8                                                                                                     | Provide all data inputs in a file format from which data can be efficiently extracted (e.g., a spreadsheet as opposed to a PDF), including all relevant meta-data listed in item 5. For any data inputs that cannot be shared due to ethical or legal reasons, such as third-party ownership, provide a contact                               | Downloads of input data are available through online tools, including data visualization:                                                  | Online data visualization tools, data query tools, and the Global Health Data Exchange:                             |

|                               |                                                                                                                                                                                                                                                                         |                                                                                                                                                                               |                                                                                                                                           |
|-------------------------------|-------------------------------------------------------------------------------------------------------------------------------------------------------------------------------------------------------------------------------------------------------------------------|-------------------------------------------------------------------------------------------------------------------------------------------------------------------------------|-------------------------------------------------------------------------------------------------------------------------------------------|
|                               | name or the name of the institution that retains the right to the data.                                                                                                                                                                                                 | <a href="http://ghdx.healthdata.org">http://ghdx.healthdata.org</a>                                                                                                           | <a href="http://ghdx.healthdata.org">http://ghdx.healthdata.org</a>                                                                       |
| <b>Data analysis</b>          |                                                                                                                                                                                                                                                                         |                                                                                                                                                                               |                                                                                                                                           |
| 9                             | Provide a conceptual overview of the data analysis method. A diagram may be helpful.                                                                                                                                                                                    | Flow diagrams of the overall methodological processes, as well as cause-specific modelling processes, have been provided                                                      | Main text (Methods) and methods appendix                                                                                                  |
| 10                            | Provide a detailed description of all steps of the analysis, including mathematical formulae. This description should cover, as relevant, data cleaning, data pre-processing, data adjustments and weighting of data sources, and mathematical or statistical model(s). | Flow diagrams and corresponding methodological write-ups for each cause, as well as the demographics and cause of death databases and modelling processes, have been provided | Main text (Methods) and methods appendix                                                                                                  |
| 11                            | Describe how candidate models were evaluated and how the final model(s) were selected.                                                                                                                                                                                  | Details on model evaluation and finalization have been provided                                                                                                               | Methods appendix                                                                                                                          |
| 12                            | Provide the results of an evaluation of model performance, if done, as well as the results of any relevant sensitivity analysis.                                                                                                                                        | Details on evaluation of model performance have been provided                                                                                                                 | Methods appendix                                                                                                                          |
| 13                            | Describe methods for calculating uncertainty of the estimates. State which sources of uncertainty were, and were not, accounted for in the uncertainty analysis.                                                                                                        | Details on uncertainty calculations have been provided                                                                                                                        | Methods appendix                                                                                                                          |
| 14                            | State how analytic or statistical source code used to generate estimates can be accessed.                                                                                                                                                                               | Access statement provided                                                                                                                                                     | Code is provided in an online repository [link to be added upon acceptance]                                                               |
| <b>Results and Discussion</b> |                                                                                                                                                                                                                                                                         |                                                                                                                                                                               |                                                                                                                                           |
| 15                            | Provide published estimates in a file format from which data can be efficiently extracted.                                                                                                                                                                              | GBD 2017 results are available through online data visualization tools, the Global Health Data Exchange, and the online data query tool                                       | Online data tools: <a href="http://ghdx.healthdata.org/gbd-2017">http://ghdx.healthdata.org/gbd-2017</a>                                  |
| 16                            | Report a quantitative measure of the uncertainty of the estimates (e.g. uncertainty intervals).                                                                                                                                                                         | Uncertainty intervals are provided with all results                                                                                                                           | Main text, methods appendix, and online data tools: <a href="http://ghdx.healthdata.org/gbd-2017">http://ghdx.healthdata.org/gbd-2017</a> |

|    |                                                                                                                                                          |                                                                                 |                                                         |
|----|----------------------------------------------------------------------------------------------------------------------------------------------------------|---------------------------------------------------------------------------------|---------------------------------------------------------|
| 17 | Interpret results in light of existing evidence. If updating a previous set of estimates, describe the reasons for changes in estimates.                 | Discussion of methodological changes between GBD 2016 and GBD 2017 was provided | Main text (Methods and Discussion) and methods appendix |
| 18 | Discuss limitations of the estimates. Include a discussion of any modelling assumptions or data limitations that affect interpretation of the estimates. | Discussion of limitations was provided                                          | Main text (Limitations) and methods appendix            |

**Appendix Table 2. GBD location hierarchy with levels**

| Geography                                        | Level |
|--------------------------------------------------|-------|
| Global                                           | 0     |
| Low SDI                                          | 1     |
| Low-middle SDI                                   | 1     |
| Middle SDI                                       | 1     |
| High-middle SDI                                  | 1     |
| High SDI                                         | 1     |
| Central Europe, Eastern Europe, and Central Asia | 1     |
| Central Asia                                     | 2     |
| Armenia                                          | 3     |
| Azerbaijan                                       | 3     |
| Georgia                                          | 3     |
| Kazakhstan                                       | 3     |
| Kyrgyzstan                                       | 3     |
| Mongolia                                         | 3     |
| Tajikistan                                       | 3     |
| Turkmenistan                                     | 3     |
| Uzbekistan                                       | 3     |
| Central Europe                                   | 2     |
| Albania                                          | 3     |
| Bosnia and Herzegovina                           | 3     |
| Bulgaria                                         | 3     |
| Croatia                                          | 3     |
| Czech Republic                                   | 3     |
| Hungary                                          | 3     |
| Macedonia                                        | 3     |
| Montenegro                                       | 3     |
| Poland                                           | 3     |
| Romania                                          | 3     |
| Serbia                                           | 3     |
| Slovakia                                         | 3     |
| Slovenia                                         | 3     |
| Eastern Europe                                   | 2     |
| Belarus                                          | 3     |
| Estonia                                          | 3     |
| Latvia                                           | 3     |
| Lithuania                                        | 3     |
| Moldova                                          | 3     |
| Russian Federation                               | 3     |
| Ukraine                                          | 3     |
| High-income                                      | 1     |
| Australasia                                      | 2     |
| Australia                                        | 3     |
| New Zealand                                      | 3     |
| High-income Asia Pacific                         | 2     |

**Appendix Table 1. GBD location hierarchy with levels**

| Geography | Level |
|-----------|-------|
| Brunei    | 3     |
| Japan     | 3     |
| Aichi     | 4     |
| Akita     | 4     |
| Aomori    | 4     |
| Chiba     | 4     |
| Ehime     | 4     |
| Fukui     | 4     |
| Fukuoka   | 4     |
| Fukushima | 4     |
| Gifu      | 4     |
| Gunma     | 4     |
| Hiroshima | 4     |
| Hokkaidō  | 4     |
| Hyōgo     | 4     |
| Ibaraki   | 4     |
| Ishikawa  | 4     |
| Iwate     | 4     |
| Kagawa    | 4     |
| Kagoshima | 4     |
| Kanagawa  | 4     |
| Kōchi     | 4     |
| Kumamoto  | 4     |
| Kyōto     | 4     |
| Mie       | 4     |
| Miyagi    | 4     |
| Miyazaki  | 4     |
| Nagano    | 4     |
| Nagasaki  | 4     |
| Nara      | 4     |
| Niigata   | 4     |
| Ōita      | 4     |
| Okayama   | 4     |
| Okinawa   | 4     |
| Ōsaka     | 4     |
| Saga      | 4     |
| Saitama   | 4     |
| Shiga     | 4     |
| Shimane   | 4     |
| Shizuoka  | 4     |
| Tochigi   | 4     |
| Tokushima | 4     |
| Tōkyō     | 4     |
| Tottori   | 4     |
| Toyama    | 4     |

**Appendix Table 1. GBD location hierarchy with levels**

| Geography                 | Level |
|---------------------------|-------|
| Wakayama                  | 4     |
| Yamagata                  | 4     |
| Yamaguchi                 | 4     |
| Yamanashi                 | 4     |
| South Korea               | 3     |
| Singapore                 | 3     |
| High-income North America | 2     |
| Canada                    | 3     |
| Greenland                 | 3     |
| United States             | 3     |
| Alabama                   | 4     |
| Alaska                    | 4     |
| Arizona                   | 4     |
| Arkansas                  | 4     |
| California                | 4     |
| Colorado                  | 4     |
| Connecticut               | 4     |
| Delaware                  | 4     |
| District of Columbia      | 4     |
| Florida                   | 4     |
| Georgia                   | 4     |
| Hawaii                    | 4     |
| Idaho                     | 4     |
| Illinois                  | 4     |
| Indiana                   | 4     |
| Iowa                      | 4     |
| Kansas                    | 4     |
| Kentucky                  | 4     |
| Louisiana                 | 4     |
| Maine                     | 4     |
| Maryland                  | 4     |
| Massachusetts             | 4     |
| Michigan                  | 4     |
| Minnesota                 | 4     |
| Mississippi               | 4     |
| Missouri                  | 4     |
| Montana                   | 4     |
| Nebraska                  | 4     |
| Nevada                    | 4     |
| New Hampshire             | 4     |
| New Jersey                | 4     |
| New Mexico                | 4     |
| New York                  | 4     |
| North Carolina            | 4     |
| North Dakota              | 4     |

**Appendix Table 1. GBD location hierarchy with levels**

| Geography               | Level |
|-------------------------|-------|
| Ohio                    | 4     |
| Oklahoma                | 4     |
| Oregon                  | 4     |
| Pennsylvania            | 4     |
| Rhode Island            | 4     |
| South Carolina          | 4     |
| South Dakota            | 4     |
| Tennessee               | 4     |
| Texas                   | 4     |
| Utah                    | 4     |
| Vermont                 | 4     |
| Virginia                | 4     |
| Washington              | 4     |
| West Virginia           | 4     |
| Wisconsin               | 4     |
| Wyoming                 | 4     |
| Southern Latin America  | 2     |
| Argentina               | 3     |
| Chile                   | 3     |
| Uruguay                 | 3     |
| Western Europe          | 2     |
| Andorra                 | 3     |
| Austria                 | 3     |
| Belgium                 | 3     |
| Cyprus                  | 3     |
| Denmark                 | 3     |
| Finland                 | 3     |
| France                  | 3     |
| Germany                 | 3     |
| Greece                  | 3     |
| Iceland                 | 3     |
| Ireland                 | 3     |
| Israel                  | 3     |
| Italy                   | 3     |
| Luxembourg              | 3     |
| Malta                   | 3     |
| Netherlands             | 3     |
| Norway                  | 3     |
| Portugal                | 3     |
| Spain                   | 3     |
| Sweden                  | 3     |
| Stockholm               | 4     |
| Sweden except Stockholm | 4     |
| Switzerland             | 3     |
| United Kingdom          | 3     |



**Appendix Table 1. GBD location hierarchy with levels**

| <b>Geography</b>       | <b>Level</b> |
|------------------------|--------------|
| England                | 4            |
| East Midlands          | 5            |
| Derby                  | 6            |
| Derbyshire             | 6            |
| Leicester              | 6            |
| Leicestershire         | 6            |
| Lincolnshire           | 6            |
| Northamptonshire       | 6            |
| Nottingham             | 6            |
| Nottinghamshire        | 6            |
| Rutland                | 6            |
| East of England        | 5            |
| Bedford                | 6            |
| Cambridgeshire         | 6            |
| Central Bedfordshire   | 6            |
| Essex                  | 6            |
| Hertfordshire          | 6            |
| Luton                  | 6            |
| Norfolk                | 6            |
| Peterborough           | 6            |
| Southend-on-Sea        | 6            |
| Suffolk                | 6            |
| Thurrock               | 6            |
| Greater London         | 5            |
| Barking and Dagenham   | 6            |
| Barnet                 | 6            |
| Bexley                 | 6            |
| Brent                  | 6            |
| Bromley                | 6            |
| Camden                 | 6            |
| Croydon                | 6            |
| Ealing                 | 6            |
| Enfield                | 6            |
| Greenwich              | 6            |
| Hackney                | 6            |
| Hammersmith and Fulham | 6            |
| Haringey               | 6            |
| Harrow                 | 6            |
| Havering               | 6            |
| Hillingdon             | 6            |
| Hounslow               | 6            |
| Islington              | 6            |
| Kensington and Chelsea | 6            |
| Kingston upon Thames   | 6            |
| Lambeth                | 6            |

**Appendix Table 1. GBD location hierarchy with levels**

| Geography                 | Level |
|---------------------------|-------|
| Lewisham                  | 6     |
| Merton                    | 6     |
| Newham                    | 6     |
| Redbridge                 | 6     |
| Richmond upon Thames      | 6     |
| Southwark                 | 6     |
| Sutton                    | 6     |
| Tower Hamlets             | 6     |
| Waltham Forest            | 6     |
| Wandsworth                | 6     |
| Westminster               | 6     |
| North East England        | 5     |
| County Durham             | 6     |
| Darlington                | 6     |
| Gateshead                 | 6     |
| Hartlepool                | 6     |
| Middlesbrough             | 6     |
| Newcastle upon Tyne       | 6     |
| North Tyneside            | 6     |
| Northumberland            | 6     |
| Redcar and Cleveland      | 6     |
| South Tyneside            | 6     |
| Stockton-on-Tees          | 6     |
| Sunderland                | 6     |
| North West England        | 5     |
| Blackburn with Darwen     | 6     |
| Blackpool                 | 6     |
| Bolton                    | 6     |
| Bury                      | 6     |
| Cheshire East             | 6     |
| Cheshire West and Chester | 6     |
| Cumbria                   | 6     |
| Halton                    | 6     |
| Knowsley                  | 6     |
| Lancashire                | 6     |
| Liverpool                 | 6     |
| Manchester                | 6     |
| Oldham                    | 6     |
| Rochdale                  | 6     |
| Salford                   | 6     |
| Sefton                    | 6     |
| St Helens                 | 6     |
| Stockport                 | 6     |
| Tameside                  | 6     |
| Trafford                  | 6     |

**Appendix Table 1. GBD location hierarchy with levels**

| <b>Geography</b>             | <b>Level</b> |
|------------------------------|--------------|
| Warrington                   | 6            |
| Wigan                        | 6            |
| Wirral                       | 6            |
| South East England           | 5            |
| Bracknell Forest             | 6            |
| Brighton and Hove            | 6            |
| Buckinghamshire              | 6            |
| East Sussex                  | 6            |
| Hampshire                    | 6            |
| Isle of Wight                | 6            |
| Kent                         | 6            |
| Medway                       | 6            |
| Milton Keynes                | 6            |
| Oxfordshire                  | 6            |
| Portsmouth                   | 6            |
| Reading                      | 6            |
| Slough                       | 6            |
| Southampton                  | 6            |
| Surrey                       | 6            |
| West Berkshire               | 6            |
| West Sussex                  | 6            |
| Windsor and Maidenhead       | 6            |
| Wokingham                    | 6            |
| South West England           | 5            |
| Bath and North East Somerset | 6            |
| Bournemouth                  | 6            |
| Bristol, City of             | 6            |
| Cornwall                     | 6            |
| Devon                        | 6            |
| Dorset                       | 6            |
| Gloucestershire              | 6            |
| North Somerset               | 6            |
| Plymouth                     | 6            |
| Poole                        | 6            |
| Somerset                     | 6            |
| South Gloucestershire        | 6            |
| Swindon                      | 6            |
| Torbay                       | 6            |
| Wiltshire                    | 6            |
| West Midlands                | 5            |
| Birmingham                   | 6            |
| Coventry                     | 6            |
| Dudley                       | 6            |
| Herefordshire, County of     | 6            |
| Sandwell                     | 6            |

**Appendix Table 1. GBD location hierarchy with levels**

| <b>Geography</b>            | <b>Level</b> |
|-----------------------------|--------------|
| Shropshire                  | 6            |
| Solihull                    | 6            |
| Staffordshire               | 6            |
| Stoke-on-Trent              | 6            |
| Telford and Wrekin          | 6            |
| Walsall                     | 6            |
| Warwickshire                | 6            |
| Wolverhampton               | 6            |
| Worcestershire              | 6            |
| Yorkshire and the Humber    | 5            |
| Barnsley                    | 6            |
| Bradford                    | 6            |
| Calderdale                  | 6            |
| Doncaster                   | 6            |
| East Riding of Yorkshire    | 6            |
| Kingston upon Hull, City of | 6            |
| Kirklees                    | 6            |
| Leeds                       | 6            |
| North East Lincolnshire     | 6            |
| North Lincolnshire          | 6            |
| North Yorkshire             | 6            |
| Rotherham                   | 6            |
| Sheffield                   | 6            |
| Wakefield                   | 6            |
| York                        | 6            |
| Northern Ireland            | 4            |
| Scotland                    | 4            |
| Wales                       | 4            |
| Latin America and Caribbean | 1            |
| Andean Latin America        | 2            |
| Bolivia                     | 3            |
| Ecuador                     | 3            |
| Peru                        | 3            |
| Caribbean                   | 2            |
| Antigua and Barbuda         | 3            |
| The Bahamas                 | 3            |
| Barbados                    | 3            |
| Belize                      | 3            |
| Bermuda                     | 3            |
| Cuba                        | 3            |
| Dominica                    | 3            |
| Dominican Republic          | 3            |
| Grenada                     | 3            |
| Guyana                      | 3            |
| Haiti                       | 3            |

**Appendix Table 1. GBD location hierarchy with levels**

| <b>Geography</b>                 | <b>Level</b> |
|----------------------------------|--------------|
| Jamaica                          | 3            |
| Puerto Rico                      | 3            |
| Saint Lucia                      | 3            |
| Saint Vincent and the Grenadines | 3            |
| Suriname                         | 3            |
| Trinidad and Tobago              | 3            |
| Virgin Islands, U.S.             | 3            |
| Central Latin America            | 2            |
| Colombia                         | 3            |
| Costa Rica                       | 3            |
| El Salvador                      | 3            |
| Guatemala                        | 3            |
| Honduras                         | 3            |
| Mexico                           | 3            |
| Aguascalientes                   | 4            |
| Baja California                  | 4            |
| Baja California Sur              | 4            |
| Campeche                         | 4            |
| Chiapas                          | 4            |
| Chihuahua                        | 4            |
| Coahuila                         | 4            |
| Colima                           | 4            |
| Mexico City                      | 4            |
| Durango                          | 4            |
| Guanajuato                       | 4            |
| Guerrero                         | 4            |
| Hidalgo                          | 4            |
| Jalisco                          | 4            |
| México                           | 4            |
| Michoacán de Ocampo              | 4            |
| Morelos                          | 4            |
| Nayarit                          | 4            |
| Nuevo León                       | 4            |
| Oaxaca                           | 4            |
| Puebla                           | 4            |
| Querétaro                        | 4            |
| Quintana Roo                     | 4            |
| San Luis Potosí                  | 4            |
| Sinaloa                          | 4            |
| Sonora                           | 4            |
| Tabasco                          | 4            |
| Tamaulipas                       | 4            |
| Tlaxcala                         | 4            |
| Veracruz de Ignacio de la Llave  | 4            |
| Yucatán                          | 4            |

**Appendix Table 1. GBD location hierarchy with levels**

| <b>Geography</b>             | <b>Level</b> |
|------------------------------|--------------|
| Zacatecas                    | 4            |
| Nicaragua                    | 3            |
| Panama                       | 3            |
| Venezuela                    | 3            |
| Tropical Latin America       | 2            |
| Brazil                       | 3            |
| Acre                         | 4            |
| Alagoas                      | 4            |
| Amapá                        | 4            |
| Amazonas                     | 4            |
| Bahia                        | 4            |
| Ceará                        | 4            |
| Distrito Federal             | 4            |
| Espírito Santo               | 4            |
| Goiás                        | 4            |
| Maranhão                     | 4            |
| Mato Grosso                  | 4            |
| Mato Grosso do Sul           | 4            |
| Minas Gerais                 | 4            |
| Pará                         | 4            |
| Paraíba                      | 4            |
| Paraná                       | 4            |
| Pernambuco                   | 4            |
| Piauí                        | 4            |
| Rio de Janeiro               | 4            |
| Rio Grande do Norte          | 4            |
| Rio Grande do Sul            | 4            |
| Rondônia                     | 4            |
| Roraima                      | 4            |
| Santa Catarina               | 4            |
| São Paulo                    | 4            |
| Sergipe                      | 4            |
| Tocantins                    | 4            |
| Paraguay                     | 3            |
| North Africa and Middle East | 1            |
| North Africa and Middle East | 2            |
| Afghanistan                  | 3            |
| Algeria                      | 3            |
| Bahrain                      | 3            |
| Egypt                        | 3            |
| Iran                         | 3            |
| Iraq                         | 3            |
| Jordan                       | 3            |
| Kuwait                       | 3            |
| Lebanon                      | 3            |

**Appendix Table 1. GBD location hierarchy with levels**

| <b>Geography</b>     | <b>Level</b> |
|----------------------|--------------|
| Libya                | 3            |
| Morocco              | 3            |
| Palestine            | 3            |
| Oman                 | 3            |
| Qatar                | 3            |
| Saudi Arabia         | 3            |
| Sudan                | 3            |
| Syria                | 3            |
| Tunisia              | 3            |
| Turkey               | 3            |
| United Arab Emirates | 3            |
| Yemen                | 3            |
| South Asia           | 1            |
| South Asia           | 2            |
| Bangladesh           | 3            |
| Bhutan               | 3            |
| India                | 3            |
| Andhra Pradesh       | 4            |
| Arunachal Pradesh    | 4            |
| Assam                | 4            |
| Bihar                | 4            |
| Chhattisgarh         | 4            |
| Delhi                | 4            |
| Goa                  | 4            |
| Gujarat              | 4            |
| Haryana              | 4            |
| Himachal Pradesh     | 4            |
| Jammu and Kashmir    | 4            |
| Jharkhand            | 4            |
| Karnataka            | 4            |
| Kerala               | 4            |
| Madhya Pradesh       | 4            |
| Maharashtra          | 4            |
| Manipur              | 4            |
| Meghalaya            | 4            |
| Mizoram              | 4            |
| Nagaland             | 4            |
| Odisha               | 4            |
| Punjab               | 4            |
| Rajasthan            | 4            |
| Sikkim               | 4            |
| Tamil Nadu           | 4            |
| Telangana            | 4            |
| Tripura              | 4            |
| Uttar Pradesh        | 4            |

**Appendix Table 1. GBD location hierarchy with levels**

| Geography                              | Level |
|----------------------------------------|-------|
| Uttarakhand                            | 4     |
| West Bengal                            | 4     |
| Union Territories other than Delhi     | 4     |
| Nepal                                  | 3     |
| Pakistan                               | 3     |
| Southeast Asia, East Asia, and Oceania | 1     |
| East Asia                              | 2     |
| China                                  | 3     |
| North Korea                            | 3     |
| Taiwan                                 | 3     |
| Oceania                                | 2     |
| American Samoa                         | 3     |
| Federated States of Micronesia         | 3     |
| Fiji                                   | 3     |
| Guam                                   | 3     |
| Kiribati                               | 3     |
| Marshall Islands                       | 3     |
| Northern Mariana Islands               | 3     |
| Papua New Guinea                       | 3     |
| Samoa                                  | 3     |
| Solomon Islands                        | 3     |
| Tonga                                  | 3     |
| Vanuatu                                | 3     |
| Southeast Asia                         | 2     |
| Cambodia                               | 3     |
| Indonesia                              | 3     |
| Laos                                   | 3     |
| Malaysia                               | 3     |
| Maldives                               | 3     |
| Mauritius                              | 3     |
| Myanmar                                | 3     |
| Philippines                            | 3     |
| Sri Lanka                              | 3     |
| Seychelles                             | 3     |
| Thailand                               | 3     |
| Timor-Leste                            | 3     |
| Vietnam                                | 3     |
| Sub-Saharan Africa                     | 1     |
| Central Sub-Saharan Africa             | 2     |
| Angola                                 | 3     |
| Central African Republic               | 3     |
| Congo                                  | 3     |
| Democratic Republic of the Congo       | 3     |
| Equatorial Guinea                      | 3     |
| Gabon                                  | 3     |



**Appendix Table 1. GBD location hierarchy with levels**

| <b>Geography</b>           | <b>Level</b> |
|----------------------------|--------------|
| Eastern Sub-Saharan Africa | 2            |
| Burundi                    | 3            |
| Comoros                    | 3            |
| Djibouti                   | 3            |
| Eritrea                    | 3            |
| Ethiopia                   | 3            |
| Kenya                      | 3            |
| Baringo                    | 4            |
| Bomet                      | 4            |
| Bungoma                    | 4            |
| Busia                      | 4            |
| Elgeyo-Marakwet            | 4            |
| Embu                       | 4            |
| Garissa                    | 4            |
| HomaBay                    | 4            |
| Isiolo                     | 4            |
| Kajiado                    | 4            |
| Kakamega                   | 4            |
| Kericho                    | 4            |
| Kiambu                     | 4            |
| Kilifi                     | 4            |
| Kirinyaga                  | 4            |
| Kisii                      | 4            |
| Kisumu                     | 4            |
| Kitui                      | 4            |
| Kwale                      | 4            |
| Laikipia                   | 4            |
| Lamu                       | 4            |
| Machakos                   | 4            |
| Makueni                    | 4            |
| Mandera                    | 4            |
| Marsabit                   | 4            |
| Meru                       | 4            |
| Migori                     | 4            |
| Mombasa                    | 4            |
| Murang'a                   | 4            |
| Nairobi                    | 4            |
| Nakuru                     | 4            |
| Nandi                      | 4            |
| Narok                      | 4            |
| Nyamira                    | 4            |
| Nyandarua                  | 4            |
| Nyeri                      | 4            |
| Samburu                    | 4            |
| Siaya                      | 4            |

**Appendix Table 1. GBD location hierarchy with levels**

| <b>Geography</b>            | <b>Level</b> |
|-----------------------------|--------------|
| TaitaTaveta                 | 4            |
| TanaRiver                   | 4            |
| TharakaNithi                | 4            |
| TransNzoia                  | 4            |
| Turkana                     | 4            |
| UasinGishu                  | 4            |
| Vihiga                      | 4            |
| Wajir                       | 4            |
| WestPokot                   | 4            |
| Madagascar                  | 3            |
| Malawi                      | 3            |
| Mozambique                  | 3            |
| Rwanda                      | 3            |
| Somalia                     | 3            |
| South Sudan                 | 3            |
| Tanzania                    | 3            |
| Uganda                      | 3            |
| Zambia                      | 3            |
| Southern Sub-Saharan Africa | 2            |
| Botswana                    | 3            |
| Lesotho                     | 3            |
| Namibia                     | 3            |
| South Africa                | 3            |
| Swaziland                   | 3            |
| Zimbabwe                    | 3            |
| Western Sub-Saharan Africa  | 2            |
| Benin                       | 3            |
| Burkina Faso                | 3            |
| Cameroon                    | 3            |
| Cape Verde                  | 3            |
| Chad                        | 3            |
| Cote d'Ivoire               | 3            |
| The Gambia                  | 3            |
| Ghana                       | 3            |
| Guinea                      | 3            |
| Guinea-Bissau               | 3            |
| Liberia                     | 3            |
| Mali                        | 3            |
| Mauritania                  | 3            |
| Niger                       | 3            |
| Nigeria                     | 3            |
| Sao Tome and Principe       | 3            |
| Senegal                     | 3            |
| Sierra Leone                | 3            |
| Togo                        | 3            |

**Appendix Table 3. Number of all-cause mortality data sources by type and location, 1950-2017**

| Geography              | SBH | CBH | HH | SIBS | VR/SRS/DSP | DSS |
|------------------------|-----|-----|----|------|------------|-----|
| Armenia                | 4   | 4   | 0  | 0    | 38         | 0   |
| Azerbaijan             | 4   | 1   | 2  | 0    | 39         | 0   |
| Georgia                | 3   | 3   | 1  | 0    | 38         | 0   |
| Kazakhstan             | 8   | 2   | 0  | 0    | 38         | 0   |
| Kyrgyzstan             | 7   | 4   | 0  | 0    | 39         | 0   |
| Mongolia               | 7   | 2   | 1  | 0    | 28         | 0   |
| Tajikistan             | 7   | 1   | 2  | 0    | 37         | 0   |
| Turkmenistan           | 3   | 1   | 1  | 0    | 38         | 0   |
| Uzbekistan             | 4   | 2   | 0  | 0    | 37         | 0   |
| Albania                | 5   | 2   | 0  | 0    | 34         | 0   |
| Bosnia and Herzegovina | 0   | 0   | 0  | 0    | 61         | 0   |
| Bulgaria               | 4   | 0   | 0  | 0    | 67         | 0   |
| Croatia                | 0   | 0   | 0  | 0    | 67         | 0   |
| Czech Republic         | 0   | 0   | 0  | 0    | 67         | 0   |
| Hungary                | 1   | 0   | 0  | 0    | 67         | 0   |
| Macedonia              | 2   | 0   | 0  | 0    | 67         | 0   |
| Montenegro             | 1   | 0   | 4  | 0    | 60         | 0   |
| Poland                 | 1   | 0   | 0  | 0    | 67         | 0   |
| Romania                | 4   | 1   | 1  | 0    | 61         | 0   |
| Serbia                 | 2   | 0   | 4  | 0    | 60         | 0   |
| Slovakia               | 0   | 0   | 0  | 0    | 67         | 0   |
| Slovenia               | 0   | 0   | 0  | 0    | 67         | 0   |
| Belarus                | 2   | 0   | 0  | 0    | 59         | 0   |
| Estonia                | 1   | 0   | 0  | 0    | 57         | 0   |
| Latvia                 | 1   | 0   | 0  | 0    | 57         | 0   |
| Lithuania              | 0   | 0   | 0  | 0    | 58         | 0   |
| Moldova                | 4   | 2   | 0  | 0    | 40         | 0   |
| Russian Federation     | 1   | 0   | 0  | 0    | 58         | 0   |
| Ukraine                | 5   | 2   | 0  | 0    | 58         | 0   |
| Australia              | 0   | 0   | 0  | 0    | 66         | 0   |
| New Zealand            | 0   | 0   | 0  | 0    | 67         | 0   |
| Brunei                 | 1   | 0   | 0  | 0    | 57         | 0   |
| Japan                  | 0   | 0   | 0  | 0    | 66         | 0   |
| Aichi                  | 0   | 0   | 0  | 0    | 37         | 0   |
| Akita                  | 0   | 0   | 0  | 0    | 37         | 0   |
| Aomori                 | 0   | 0   | 0  | 0    | 37         | 0   |
| Chiba                  | 0   | 0   | 0  | 0    | 37         | 0   |
| Ehime                  | 0   | 0   | 0  | 0    | 37         | 0   |
| Fukui                  | 0   | 0   | 0  | 0    | 37         | 0   |
| Fukuoka                | 0   | 0   | 0  | 0    | 37         | 0   |
| Fukushima              | 0   | 0   | 0  | 0    | 37         | 0   |
| Gifu                   | 0   | 0   | 0  | 0    | 37         | 0   |
| Gunma                  | 0   | 0   | 0  | 0    | 37         | 0   |
| Hiroshima              | 0   | 0   | 0  | 0    | 37         | 0   |
| Hokkaidō               | 0   | 0   | 0  | 0    | 37         | 0   |
| Hyōgo                  | 0   | 0   | 0  | 0    | 36         | 0   |
| Ibaraki                | 0   | 0   | 0  | 0    | 37         | 0   |
| Ishikawa               | 0   | 0   | 0  | 0    | 37         | 0   |
| Iwate                  | 0   | 0   | 0  | 0    | 36         | 0   |
| Kagawa                 | 0   | 0   | 0  | 0    | 37         | 0   |
| Kagoshima              | 0   | 0   | 0  | 0    | 37         | 0   |
| Kanagawa               | 0   | 0   | 0  | 0    | 37         | 0   |
| Kōchi                  | 0   | 0   | 0  | 0    | 37         | 0   |

**Appendix Table 3. Number of all-cause mortality data sources by type and location, 1950-2017**

| Geography            | SBH | CBH | HH | SIBS | VR/SRS/DSP | DSS |
|----------------------|-----|-----|----|------|------------|-----|
| Kumamoto             | 0   | 0   | 0  | 0    | 37         | 0   |
| Kyōto                | 0   | 0   | 0  | 0    | 37         | 0   |
| Mie                  | 0   | 0   | 0  | 0    | 37         | 0   |
| Miyagi               | 0   | 0   | 0  | 0    | 36         | 0   |
| Miyazaki             | 0   | 0   | 0  | 0    | 37         | 0   |
| Nagano               | 0   | 0   | 0  | 0    | 37         | 0   |
| Nagasaki             | 0   | 0   | 0  | 0    | 37         | 0   |
| Nara                 | 0   | 0   | 0  | 0    | 37         | 0   |
| Niigata              | 0   | 0   | 0  | 0    | 37         | 0   |
| Ōita                 | 0   | 0   | 0  | 0    | 37         | 0   |
| Okayama              | 0   | 0   | 0  | 0    | 37         | 0   |
| Okinawa              | 0   | 0   | 0  | 0    | 37         | 0   |
| Ōsaka                | 0   | 0   | 0  | 0    | 37         | 0   |
| Saga                 | 0   | 0   | 0  | 0    | 37         | 0   |
| Saitama              | 0   | 0   | 0  | 0    | 37         | 0   |
| Shiga                | 0   | 0   | 0  | 0    | 37         | 0   |
| Shimane              | 0   | 0   | 0  | 0    | 37         | 0   |
| Shizuoka             | 0   | 0   | 0  | 0    | 37         | 0   |
| Tochigi              | 0   | 0   | 0  | 0    | 37         | 0   |
| Tokushima            | 0   | 0   | 0  | 0    | 37         | 0   |
| Tōkyō                | 0   | 0   | 0  | 0    | 37         | 0   |
| Tottori              | 0   | 0   | 0  | 0    | 37         | 0   |
| Toyama               | 0   | 0   | 0  | 0    | 37         | 0   |
| Wakayama             | 0   | 0   | 0  | 0    | 37         | 0   |
| Yamagata             | 0   | 0   | 0  | 0    | 37         | 0   |
| Yamaguchi            | 0   | 0   | 0  | 0    | 37         | 0   |
| Yamanashi            | 0   | 0   | 0  | 0    | 37         | 0   |
| South Korea          | 6   | 1   | 0  | 0    | 40         | 0   |
| Singapore            | 0   | 0   | 0  | 0    | 67         | 0   |
| Canada               | 0   | 0   | 0  | 0    | 67         | 0   |
| Greenland            | 0   | 0   | 0  | 0    | 60         | 0   |
| United States        | 0   | 0   | 0  | 0    | 67         | 0   |
| Alabama              | 0   | 0   | 0  | 0    | 57         | 0   |
| Alaska               | 0   | 0   | 0  | 0    | 57         | 0   |
| Arizona              | 0   | 0   | 0  | 0    | 57         | 0   |
| Arkansas             | 0   | 0   | 0  | 0    | 57         | 0   |
| California           | 0   | 0   | 0  | 0    | 57         | 0   |
| Colorado             | 0   | 0   | 0  | 0    | 57         | 0   |
| Connecticut          | 0   | 0   | 0  | 0    | 57         | 0   |
| Delaware             | 0   | 0   | 0  | 0    | 57         | 0   |
| District of Columbia | 0   | 0   | 0  | 0    | 57         | 0   |
| Florida              | 0   | 0   | 0  | 0    | 57         | 0   |
| Georgia              | 0   | 0   | 0  | 0    | 57         | 0   |
| Hawaii               | 0   | 0   | 0  | 0    | 57         | 0   |
| Idaho                | 0   | 0   | 0  | 0    | 57         | 0   |
| Illinois             | 0   | 0   | 0  | 0    | 57         | 0   |
| Indiana              | 0   | 0   | 0  | 0    | 57         | 0   |
| Iowa                 | 0   | 0   | 0  | 0    | 57         | 0   |
| Kansas               | 0   | 0   | 0  | 0    | 57         | 0   |
| Kentucky             | 0   | 0   | 0  | 0    | 57         | 0   |
| Louisiana            | 0   | 0   | 0  | 0    | 57         | 0   |
| Maine                | 0   | 0   | 0  | 0    | 57         | 0   |
| Maryland             | 0   | 0   | 0  | 0    | 57         | 0   |

**Appendix Table 3. Number of all-cause mortality data sources by type and location, 1950-2017**

| Geography      | SBH | CBH | HH | SIBS | VR/SRS/DSP | DSS |
|----------------|-----|-----|----|------|------------|-----|
| Massachusetts  | 0   | 0   | 0  | 0    | 57         | 0   |
| Michigan       | 0   | 0   | 0  | 0    | 57         | 0   |
| Minnesota      | 0   | 0   | 0  | 0    | 57         | 0   |
| Mississippi    | 0   | 0   | 0  | 0    | 57         | 0   |
| Missouri       | 0   | 0   | 0  | 0    | 57         | 0   |
| Montana        | 0   | 0   | 0  | 0    | 57         | 0   |
| Nebraska       | 0   | 0   | 0  | 0    | 57         | 0   |
| Nevada         | 0   | 0   | 0  | 0    | 57         | 0   |
| New Hampshire  | 0   | 0   | 0  | 0    | 57         | 0   |
| New Jersey     | 0   | 0   | 0  | 0    | 57         | 0   |
| New Mexico     | 0   | 0   | 0  | 0    | 57         | 0   |
| New York       | 0   | 0   | 0  | 0    | 57         | 0   |
| North Carolina | 0   | 0   | 0  | 0    | 57         | 0   |
| North Dakota   | 0   | 0   | 0  | 0    | 57         | 0   |
| Ohio           | 0   | 0   | 0  | 0    | 57         | 0   |
| Oklahoma       | 0   | 0   | 0  | 0    | 57         | 0   |
| Oregon         | 0   | 0   | 0  | 0    | 57         | 0   |
| Pennsylvania   | 0   | 0   | 0  | 0    | 57         | 0   |
| Rhode Island   | 0   | 0   | 0  | 0    | 57         | 0   |
| South Carolina | 0   | 0   | 0  | 0    | 57         | 0   |
| South Dakota   | 0   | 0   | 0  | 0    | 57         | 0   |
| Tennessee      | 0   | 0   | 0  | 0    | 57         | 0   |
| Texas          | 0   | 0   | 0  | 0    | 57         | 0   |
| Utah           | 0   | 0   | 0  | 0    | 57         | 0   |
| Vermont        | 0   | 0   | 0  | 0    | 57         | 0   |
| Virginia       | 0   | 0   | 0  | 0    | 57         | 0   |
| Washington     | 0   | 0   | 0  | 0    | 57         | 0   |
| West Virginia  | 0   | 0   | 0  | 0    | 57         | 0   |
| Wisconsin      | 0   | 0   | 0  | 0    | 57         | 0   |
| Wyoming        | 0   | 0   | 0  | 0    | 57         | 0   |
| Argentina      | 3   | 0   | 0  | 0    | 61         | 0   |
| Chile          | 4   | 0   | 0  | 0    | 66         | 0   |
| Uruguay        | 7   | 0   | 0  | 0    | 65         | 0   |
| Andorra        | 0   | 0   | 0  | 0    | 12         | 0   |
| Austria        | 0   | 0   | 0  | 0    | 67         | 0   |
| Belgium        | 2   | 0   | 0  | 0    | 67         | 0   |
| Cyprus         | 3   | 0   | 0  | 0    | 43         | 0   |
| Denmark        | 0   | 0   | 0  | 0    | 67         | 0   |
| Finland        | 0   | 0   | 0  | 0    | 67         | 0   |
| France         | 0   | 0   | 0  | 0    | 67         | 0   |
| Germany        | 0   | 0   | 0  | 0    | 60         | 0   |
| Greece         | 0   | 0   | 0  | 0    | 66         | 0   |
| Iceland        | 0   | 0   | 0  | 0    | 68         | 0   |
| Ireland        | 0   | 0   | 1  | 0    | 67         | 0   |
| Israel         | 0   | 0   | 0  | 0    | 67         | 0   |
| Italy          | 0   | 0   | 0  | 0    | 67         | 0   |
| Luxembourg     | 0   | 0   | 0  | 0    | 66         | 0   |
| Malta          | 0   | 0   | 0  | 0    | 67         | 0   |
| Netherlands    | 0   | 0   | 0  | 0    | 67         | 0   |
| Norway         | 0   | 0   | 0  | 0    | 67         | 0   |
| Portugal       | 1   | 1   | 0  | 0    | 66         | 0   |
| Spain          | 0   | 0   | 0  | 0    | 67         | 0   |
| Sweden         | 0   | 0   | 0  | 0    | 67         | 0   |

**Appendix Table 3. Number of all-cause mortality data sources by type and location, 1950-2017**

| Geography               | SBH | CBH | HH | SIBS | VR/SRS/DSP | DSS |
|-------------------------|-----|-----|----|------|------------|-----|
| Stockholm               | 0   | 0   | 0  | 0    | 34         | 0   |
| Sweden except Stockholm | 0   | 0   | 0  | 0    | 34         | 0   |
| Switzerland             | 1   | 0   | 0  | 0    | 67         | 0   |
| United Kingdom          | 0   | 0   | 0  | 0    | 66         | 0   |
| England                 | 0   | 0   | 0  | 0    | 36         | 0   |
| East Midlands           | 0   | 0   | 0  | 0    | 36         | 0   |
| Derby                   | 0   | 0   | 0  | 0    | 36         | 0   |
| Derbyshire              | 0   | 0   | 0  | 0    | 36         | 0   |
| Leicester               | 0   | 0   | 0  | 0    | 36         | 0   |
| Leicestershire          | 0   | 0   | 0  | 0    | 36         | 0   |
| Lincolnshire            | 0   | 0   | 0  | 0    | 36         | 0   |
| Northamptonshire        | 0   | 0   | 0  | 0    | 36         | 0   |
| Nottingham              | 0   | 0   | 0  | 0    | 36         | 0   |
| Nottinghamshire         | 0   | 0   | 0  | 0    | 36         | 0   |
| Rutland                 | 0   | 0   | 0  | 0    | 36         | 0   |
| East of England         | 0   | 0   | 0  | 0    | 36         | 0   |
| Bedford                 | 0   | 0   | 0  | 0    | 36         | 0   |
| Cambridgeshire          | 0   | 0   | 0  | 0    | 36         | 0   |
| Central Bedfordshire    | 0   | 0   | 0  | 0    | 36         | 0   |
| Essex                   | 0   | 0   | 0  | 0    | 36         | 0   |
| Hertfordshire           | 0   | 0   | 0  | 0    | 36         | 0   |
| Luton                   | 0   | 0   | 0  | 0    | 36         | 0   |
| Norfolk                 | 0   | 0   | 0  | 0    | 36         | 0   |
| Peterborough            | 0   | 0   | 0  | 0    | 36         | 0   |
| Southend-on-Sea         | 0   | 0   | 0  | 0    | 36         | 0   |
| Suffolk                 | 0   | 0   | 0  | 0    | 36         | 0   |
| Thurrock                | 0   | 0   | 0  | 0    | 36         | 0   |
| Greater London          | 0   | 0   | 0  | 0    | 36         | 0   |
| Barking and Dagenham    | 0   | 0   | 0  | 0    | 36         | 0   |
| Barnet                  | 0   | 0   | 0  | 0    | 36         | 0   |
| Bexley                  | 0   | 0   | 0  | 0    | 36         | 0   |
| Brent                   | 0   | 0   | 0  | 0    | 36         | 0   |
| Bromley                 | 0   | 0   | 0  | 0    | 36         | 0   |
| Camden                  | 0   | 0   | 0  | 0    | 36         | 0   |
| Croydon                 | 0   | 0   | 0  | 0    | 36         | 0   |
| Ealing                  | 0   | 0   | 0  | 0    | 36         | 0   |
| Enfield                 | 0   | 0   | 0  | 0    | 36         | 0   |
| Greenwich               | 0   | 0   | 0  | 0    | 36         | 0   |
| Hackney                 | 0   | 0   | 0  | 0    | 36         | 0   |
| Hammersmith and Fulham  | 0   | 0   | 0  | 0    | 36         | 0   |
| Haringey                | 0   | 0   | 0  | 0    | 36         | 0   |
| Harrow                  | 0   | 0   | 0  | 0    | 36         | 0   |
| Havering                | 0   | 0   | 0  | 0    | 36         | 0   |
| Hillingdon              | 0   | 0   | 0  | 0    | 36         | 0   |
| Hounslow                | 0   | 0   | 0  | 0    | 36         | 0   |
| Islington               | 0   | 0   | 0  | 0    | 36         | 0   |
| Kensington and Chelsea  | 0   | 0   | 0  | 0    | 36         | 0   |
| Kingston upon Thames    | 0   | 0   | 0  | 0    | 36         | 0   |
| Lambeth                 | 0   | 0   | 0  | 0    | 36         | 0   |
| Lewisham                | 0   | 0   | 0  | 0    | 36         | 0   |
| Merton                  | 0   | 0   | 0  | 0    | 36         | 0   |
| Newham                  | 0   | 0   | 0  | 0    | 36         | 0   |
| Redbridge               | 0   | 0   | 0  | 0    | 36         | 0   |

**Appendix Table 3. Number of all-cause mortality data sources by type and location, 1950-2017**

| Geography                 | SBH | CBH | HH | SIBS | VR/SRS/DSP | DSS |
|---------------------------|-----|-----|----|------|------------|-----|
| Richmond upon Thames      | 0   | 0   | 0  | 0    | 36         | 0   |
| Southwark                 | 0   | 0   | 0  | 0    | 36         | 0   |
| Sutton                    | 0   | 0   | 0  | 0    | 36         | 0   |
| Tower Hamlets             | 0   | 0   | 0  | 0    | 36         | 0   |
| Waltham Forest            | 0   | 0   | 0  | 0    | 36         | 0   |
| Wandsworth                | 0   | 0   | 0  | 0    | 36         | 0   |
| Westminster               | 0   | 0   | 0  | 0    | 36         | 0   |
| North East England        | 0   | 0   | 0  | 0    | 36         | 0   |
| County Durham             | 0   | 0   | 0  | 0    | 36         | 0   |
| Darlington                | 0   | 0   | 0  | 0    | 36         | 0   |
| Gateshead                 | 0   | 0   | 0  | 0    | 36         | 0   |
| Hartlepool                | 0   | 0   | 0  | 0    | 36         | 0   |
| Middlesbrough             | 0   | 0   | 0  | 0    | 36         | 0   |
| Newcastle upon Tyne       | 0   | 0   | 0  | 0    | 36         | 0   |
| North Tyneside            | 0   | 0   | 0  | 0    | 36         | 0   |
| Northumberland            | 0   | 0   | 0  | 0    | 36         | 0   |
| Redcar and Cleveland      | 0   | 0   | 0  | 0    | 36         | 0   |
| South Tyneside            | 0   | 0   | 0  | 0    | 36         | 0   |
| Stockton-on-Tees          | 0   | 0   | 0  | 0    | 36         | 0   |
| Sunderland                | 0   | 0   | 0  | 0    | 36         | 0   |
| North West England        | 0   | 0   | 0  | 0    | 36         | 0   |
| Blackburn with Darwen     | 0   | 0   | 0  | 0    | 36         | 0   |
| Blackpool                 | 0   | 0   | 0  | 0    | 36         | 0   |
| Bolton                    | 0   | 0   | 0  | 0    | 36         | 0   |
| Bury                      | 0   | 0   | 0  | 0    | 36         | 0   |
| Cheshire East             | 0   | 0   | 0  | 0    | 36         | 0   |
| Cheshire West and Chester | 0   | 0   | 0  | 0    | 36         | 0   |
| Cumbria                   | 0   | 0   | 0  | 0    | 36         | 0   |
| Halton                    | 0   | 0   | 0  | 0    | 36         | 0   |
| Knowsley                  | 0   | 0   | 0  | 0    | 36         | 0   |
| Lancashire                | 0   | 0   | 0  | 0    | 36         | 0   |
| Liverpool                 | 0   | 0   | 0  | 0    | 36         | 0   |
| Manchester                | 0   | 0   | 0  | 0    | 36         | 0   |
| Oldham                    | 0   | 0   | 0  | 0    | 36         | 0   |
| Rochdale                  | 0   | 0   | 0  | 0    | 36         | 0   |
| Salford                   | 0   | 0   | 0  | 0    | 36         | 0   |
| Sefton                    | 0   | 0   | 0  | 0    | 36         | 0   |
| St Helens                 | 0   | 0   | 0  | 0    | 36         | 0   |
| Stockport                 | 0   | 0   | 0  | 0    | 36         | 0   |
| Tameside                  | 0   | 0   | 0  | 0    | 36         | 0   |
| Trafford                  | 0   | 0   | 0  | 0    | 36         | 0   |
| Warrington                | 0   | 0   | 0  | 0    | 36         | 0   |
| Wigan                     | 0   | 0   | 0  | 0    | 36         | 0   |
| Wirral                    | 0   | 0   | 0  | 0    | 36         | 0   |
| South East England        | 0   | 0   | 0  | 0    | 36         | 0   |
| Bracknell Forest          | 0   | 0   | 0  | 0    | 36         | 0   |
| Brighton and Hove         | 0   | 0   | 0  | 0    | 36         | 0   |
| Buckinghamshire           | 0   | 0   | 0  | 0    | 36         | 0   |
| East Sussex               | 0   | 0   | 0  | 0    | 36         | 0   |
| Hampshire                 | 0   | 0   | 0  | 0    | 36         | 0   |
| Isle of Wight             | 0   | 0   | 0  | 0    | 36         | 0   |
| Kent                      | 0   | 0   | 0  | 0    | 36         | 0   |
| Medway                    | 0   | 0   | 0  | 0    | 36         | 0   |

**Appendix Table 3. Number of all-cause mortality data sources by type and location, 1950-2017**

| Geography                    | SBH | CBH | HH | SIBS | VR/SRS/DSP | DSS |
|------------------------------|-----|-----|----|------|------------|-----|
| Milton Keynes                | 0   | 0   | 0  | 0    | 36         | 0   |
| Oxfordshire                  | 0   | 0   | 0  | 0    | 36         | 0   |
| Portsmouth                   | 0   | 0   | 0  | 0    | 36         | 0   |
| Reading                      | 0   | 0   | 0  | 0    | 36         | 0   |
| Slough                       | 0   | 0   | 0  | 0    | 36         | 0   |
| Southampton                  | 0   | 0   | 0  | 0    | 36         | 0   |
| Surrey                       | 0   | 0   | 0  | 0    | 36         | 0   |
| West Berkshire               | 0   | 0   | 0  | 0    | 36         | 0   |
| West Sussex                  | 0   | 0   | 0  | 0    | 36         | 0   |
| Windsor and Maidenhead       | 0   | 0   | 0  | 0    | 36         | 0   |
| Wokingham                    | 0   | 0   | 0  | 0    | 36         | 0   |
| South West England           | 0   | 0   | 0  | 0    | 36         | 0   |
| Bath and North East Somerset | 0   | 0   | 0  | 0    | 36         | 0   |
| Bournemouth                  | 0   | 0   | 0  | 0    | 36         | 0   |
| Bristol, City of             | 0   | 0   | 0  | 0    | 36         | 0   |
| Cornwall                     | 0   | 0   | 0  | 0    | 36         | 0   |
| Devon                        | 0   | 0   | 0  | 0    | 36         | 0   |
| Dorset                       | 0   | 0   | 0  | 0    | 36         | 0   |
| Gloucestershire              | 0   | 0   | 0  | 0    | 36         | 0   |
| North Somerset               | 0   | 0   | 0  | 0    | 36         | 0   |
| Plymouth                     | 0   | 0   | 0  | 0    | 36         | 0   |
| Poole                        | 0   | 0   | 0  | 0    | 36         | 0   |
| Somerset                     | 0   | 0   | 0  | 0    | 36         | 0   |
| South Gloucestershire        | 0   | 0   | 0  | 0    | 36         | 0   |
| Swindon                      | 0   | 0   | 0  | 0    | 36         | 0   |
| Torbay                       | 0   | 0   | 0  | 0    | 36         | 0   |
| Wiltshire                    | 0   | 0   | 0  | 0    | 36         | 0   |
| West Midlands                | 0   | 0   | 0  | 0    | 36         | 0   |
| Birmingham                   | 0   | 0   | 0  | 0    | 36         | 0   |
| Coventry                     | 0   | 0   | 0  | 0    | 36         | 0   |
| Dudley                       | 0   | 0   | 0  | 0    | 36         | 0   |
| Herefordshire, County of     | 0   | 0   | 0  | 0    | 36         | 0   |
| Sandwell                     | 0   | 0   | 0  | 0    | 36         | 0   |
| Shropshire                   | 0   | 0   | 0  | 0    | 36         | 0   |
| Solihull                     | 0   | 0   | 0  | 0    | 36         | 0   |
| Staffordshire                | 0   | 0   | 0  | 0    | 36         | 0   |
| Stoke-on-Trent               | 0   | 0   | 0  | 0    | 36         | 0   |
| Telford and Wrekin           | 0   | 0   | 0  | 0    | 36         | 0   |
| Walsall                      | 0   | 0   | 0  | 0    | 36         | 0   |
| Warwickshire                 | 0   | 0   | 0  | 0    | 36         | 0   |
| Wolverhampton                | 0   | 0   | 0  | 0    | 36         | 0   |
| Worcestershire               | 0   | 0   | 0  | 0    | 36         | 0   |
| Yorkshire and the Humber     | 0   | 0   | 0  | 0    | 36         | 0   |
| Barnsley                     | 0   | 0   | 0  | 0    | 36         | 0   |
| Bradford                     | 0   | 0   | 0  | 0    | 36         | 0   |
| Calderdale                   | 0   | 0   | 0  | 0    | 36         | 0   |
| Doncaster                    | 0   | 0   | 0  | 0    | 36         | 0   |
| East Riding of Yorkshire     | 0   | 0   | 0  | 0    | 36         | 0   |
| Kingston upon Hull, City of  | 0   | 0   | 0  | 0    | 36         | 0   |
| Kirklees                     | 0   | 0   | 0  | 0    | 36         | 0   |
| Leeds                        | 0   | 0   | 0  | 0    | 36         | 0   |
| North East Lincolnshire      | 0   | 0   | 0  | 0    | 36         | 0   |
| North Lincolnshire           | 0   | 0   | 0  | 0    | 36         | 0   |



**Appendix Table 3. Number of all-cause mortality data sources by type and location, 1950-2017**

| Geography                        | SBH | CBH | HH | SIBS | VR/SRS/DSP | DSS |
|----------------------------------|-----|-----|----|------|------------|-----|
| North Yorkshire                  | 0   | 0   | 0  | 0    | 36         | 0   |
| Rotherham                        | 0   | 0   | 0  | 0    | 36         | 0   |
| Sheffield                        | 0   | 0   | 0  | 0    | 36         | 0   |
| Wakefield                        | 0   | 0   | 0  | 0    | 36         | 0   |
| York                             | 0   | 0   | 0  | 0    | 36         | 0   |
| Northern Ireland                 | 0   | 0   | 0  | 0    | 67         | 0   |
| Scotland                         | 0   | 0   | 0  | 0    | 67         | 0   |
| Wales                            | 0   | 0   | 0  | 0    | 36         | 0   |
| Bolivia                          | 13  | 5   | 1  | 3    | 12         | 0   |
| Ecuador                          | 17  | 7   | 0  | 2    | 63         | 0   |
| Peru                             | 19  | 15  | 0  | 4    | 63         | 0   |
| Antigua and Barbuda              | 0   | 0   | 0  | 0    | 57         | 0   |
| The Bahamas                      | 0   | 0   | 0  | 0    | 47         | 0   |
| Barbados                         | 0   | 0   | 0  | 0    | 60         | 0   |
| Belize                           | 6   | 3   | 0  | 0    | 67         | 0   |
| Bermuda                          | 1   | 0   | 0  | 0    | 66         | 0   |
| Cuba                             | 1   | 0   | 0  | 0    | 57         | 0   |
| Dominica                         | 0   | 0   | 0  | 0    | 64         | 0   |
| Dominican Republic               | 15  | 12  | 0  | 2    | 66         | 0   |
| Grenada                          | 0   | 0   | 0  | 0    | 55         | 0   |
| Guyana                           | 7   | 4   | 0  | 0    | 45         | 0   |
| Haiti                            | 8   | 6   | 2  | 2    | 0          | 0   |
| Jamaica                          | 5   | 1   | 2  | 0    | 46         | 0   |
| Puerto Rico                      | 1   | 1   | 0  | 0    | 67         | 0   |
| Saint Lucia                      | 0   | 0   | 0  | 0    | 56         | 0   |
| Saint Vincent and the Grenadines | 0   | 0   | 0  | 0    | 50         | 0   |
| Suriname                         | 2   | 0   | 0  | 0    | 57         | 0   |
| Trinidad and Tobago              | 4   | 2   | 0  | 0    | 62         | 0   |
| Virgin Islands, U.S.             | 0   | 0   | 0  | 0    | 49         | 0   |
| Colombia                         | 13  | 8   | 0  | 1    | 64         | 0   |
| Costa Rica                       | 7   | 3   | 0  | 0    | 66         | 0   |
| El Salvador                      | 10  | 6   | 2  | 3    | 65         | 0   |
| Guatemala                        | 9   | 6   | 0  | 2    | 64         | 0   |
| Honduras                         | 9   | 5   | 2  | 1    | 44         | 0   |
| Mexico                           | 18  | 2   | 1  | 0    | 67         | 0   |
| Aguascalientes                   | 16  | 1   | 0  | 0    | 38         | 0   |
| Baja California                  | 16  | 1   | 0  | 0    | 38         | 0   |
| Baja California Sur              | 16  | 1   | 0  | 0    | 38         | 0   |
| Campeche                         | 16  | 1   | 0  | 0    | 38         | 0   |
| Chiapas                          | 16  | 1   | 0  | 0    | 38         | 0   |
| Chihuahua                        | 16  | 1   | 0  | 0    | 38         | 0   |
| Coahuila                         | 16  | 1   | 0  | 0    | 38         | 0   |
| Colima                           | 16  | 1   | 0  | 0    | 38         | 0   |
| Mexico City                      | 16  | 1   | 0  | 0    | 38         | 0   |
| Durango                          | 16  | 1   | 0  | 0    | 38         | 0   |
| Guanajuato                       | 16  | 1   | 0  | 0    | 38         | 0   |
| Guerrero                         | 16  | 1   | 0  | 0    | 38         | 0   |
| Hidalgo                          | 15  | 1   | 0  | 0    | 38         | 0   |
| Jalisco                          | 16  | 1   | 0  | 0    | 38         | 0   |
| México                           | 16  | 1   | 0  | 0    | 38         | 0   |
| Michoacán de Ocampo              | 16  | 1   | 0  | 0    | 38         | 0   |
| Morelos                          | 16  | 1   | 0  | 0    | 38         | 0   |
| Nayarit                          | 16  | 1   | 0  | 0    | 38         | 0   |

**Appendix Table 3. Number of all-cause mortality data sources by type and location, 1950-2017**

| Geography                       | SBH | CBH | HH | SIBS | VR/SRS/DSP | DSS |
|---------------------------------|-----|-----|----|------|------------|-----|
| Nuevo León                      | 16  | 1   | 0  | 0    | 38         | 0   |
| Oaxaca                          | 16  | 1   | 0  | 0    | 38         | 0   |
| Puebla                          | 16  | 1   | 0  | 0    | 38         | 0   |
| Querétaro                       | 16  | 1   | 0  | 0    | 38         | 0   |
| Quintana Roo                    | 16  | 1   | 0  | 0    | 38         | 0   |
| San Luis Potosí                 | 16  | 1   | 0  | 0    | 38         | 0   |
| Sinaloa                         | 16  | 1   | 0  | 0    | 38         | 0   |
| Sonora                          | 16  | 1   | 0  | 0    | 38         | 0   |
| Tabasco                         | 16  | 1   | 0  | 0    | 38         | 0   |
| Tamaulipas                      | 16  | 1   | 0  | 0    | 38         | 0   |
| Tlaxcala                        | 16  | 1   | 0  | 0    | 38         | 0   |
| Veracruz de Ignacio de la Llave | 16  | 1   | 0  | 0    | 38         | 0   |
| Yucatán                         | 16  | 1   | 0  | 0    | 38         | 0   |
| Zacatecas                       | 16  | 1   | 0  | 0    | 38         | 0   |
| Nicaragua                       | 12  | 5   | 0  | 1    | 52         | 0   |
| Panama                          | 8   | 1   | 0  | 0    | 66         | 0   |
| Venezuela                       | 4   | 1   | 1  | 0    | 64         | 0   |
| Brazil                          | 26  | 2   | 0  | 1    | 43         | 0   |
| Acre                            | 8   | 1   | 0  | 0    | 38         | 0   |
| Alagoas                         | 20  | 2   | 0  | 0    | 38         | 0   |
| Amapá                           | 8   | 1   | 0  | 0    | 38         | 0   |
| Amazonas                        | 9   | 1   | 0  | 0    | 38         | 0   |
| Bahia                           | 20  | 2   | 0  | 0    | 38         | 0   |
| Ceará                           | 20  | 2   | 0  | 0    | 38         | 0   |
| Distrito Federal                | 20  | 1   | 0  | 0    | 38         | 0   |
| Espírito Santo                  | 20  | 1   | 0  | 0    | 38         | 0   |
| Goiás                           | 20  | 1   | 0  | 0    | 38         | 0   |
| Maranhão                        | 20  | 2   | 0  | 0    | 38         | 0   |
| Mato Grosso                     | 20  | 1   | 0  | 0    | 38         | 0   |
| Mato Grosso do Sul              | 20  | 1   | 0  | 0    | 38         | 0   |
| Minas Gerais                    | 20  | 1   | 0  | 0    | 38         | 0   |
| Pará                            | 9   | 1   | 0  | 0    | 38         | 0   |
| Paraíba                         | 20  | 2   | 0  | 0    | 37         | 0   |
| Paraná                          | 20  | 1   | 0  | 0    | 38         | 0   |
| Pernambuco                      | 20  | 2   | 0  | 0    | 38         | 0   |
| Piauí                           | 20  | 2   | 0  | 0    | 38         | 0   |
| Rio de Janeiro                  | 20  | 1   | 0  | 0    | 38         | 0   |
| Rio Grande do Norte             | 20  | 2   | 0  | 0    | 38         | 0   |
| Rio Grande do Sul               | 20  | 1   | 0  | 0    | 38         | 0   |
| Rondônia                        | 8   | 1   | 0  | 0    | 38         | 0   |
| Roraima                         | 8   | 1   | 0  | 0    | 38         | 0   |
| Santa Catarina                  | 20  | 1   | 0  | 0    | 38         | 0   |
| São Paulo                       | 19  | 1   | 0  | 0    | 38         | 0   |
| Sergipe                         | 20  | 2   | 0  | 0    | 38         | 0   |
| Tocantins                       | 8   | 1   | 0  | 0    | 27         | 0   |
| Paraguay                        | 16  | 7   | 0  | 1    | 63         | 0   |
| Afghanistan                     | 6   | 1   | 1  | 0    | 0          | 0   |
| Algeria                         | 5   | 3   | 0  | 0    | 25         | 0   |
| Bahrain                         | 4   | 0   | 2  | 0    | 33         | 0   |
| Egypt                           | 13  | 11  | 2  | 0    | 64         | 0   |
| Iran                            | 5   | 1   | 9  | 0    | 32         | 0   |
| Iraq                            | 7   | 5   | 4  | 2    | 24         | 1   |
| Jordan                          | 11  | 6   | 0  | 1    | 22         | 0   |

**Appendix Table 3. Number of all-cause mortality data sources by type and location, 1950-2017**

| Geography                          | SBH | CBH | HH | SIBS | VR/SRS/DSP | DSS |
|------------------------------------|-----|-----|----|------|------------|-----|
| Kuwait                             | 3   | 0   | 1  | 0    | 53         | 0   |
| Lebanon                            | 4   | 2   | 1  | 1    | 8          | 0   |
| Libya                              | 4   | 1   | 0  | 0    | 15         | 0   |
| Morocco                            | 9   | 6   | 1  | 2    | 10         | 0   |
| Palestine                          | 6   | 4   | 3  | 0    | 15         | 0   |
| Oman                               | 4   | 0   | 3  | 0    | 12         | 0   |
| Qatar                              | 1   | 0   | 2  | 0    | 36         | 0   |
| Saudi Arabia                       | 2   | 0   | 4  | 0    | 14         | 0   |
| Sudan                              | 8   | 5   | 2  | 1    | 0          | 0   |
| Syria                              | 7   | 4   | 1  | 0    | 31         | 0   |
| Tunisia                            | 7   | 5   | 0  | 0    | 20         | 0   |
| Turkey                             | 14  | 5   | 1  | 0    | 36         | 0   |
| United Arab Emirates               | 2   | 0   | 1  | 0    | 12         | 0   |
| Yemen                              | 7   | 5   | 2  | 0    | 0          | 0   |
| Bangladesh                         | 13  | 9   | 1  | 3    | 36         | 2   |
| Bhutan                             | 2   | 0   | 1  | 1    | 0          | 0   |
| India                              | 13  | 6   | 0  | 0    | 62         | 1   |
| Andhra Pradesh                     | 4   | 2   | 0  | 0    | 6          | 0   |
| Arunachal Pradesh                  | 10  | 4   | 0  | 0    | 3          | 0   |
| Assam                              | 15  | 5   | 0  | 0    | 23         | 0   |
| Bihar                              | 16  | 6   | 0  | 0    | 14         | 0   |
| Chhattisgarh                       | 12  | 4   | 0  | 0    | 15         | 0   |
| Delhi                              | 10  | 6   | 0  | 0    | 18         | 0   |
| Goa                                | 9   | 5   | 0  | 0    | 7          | 0   |
| Gujarat                            | 11  | 6   | 0  | 0    | 27         | 0   |
| Haryana                            | 12  | 6   | 0  | 0    | 22         | 0   |
| Himachal Pradesh                   | 12  | 6   | 0  | 0    | 27         | 0   |
| Jammu and Kashmir                  | 11  | 6   | 0  | 0    | 18         | 0   |
| Jharkhand                          | 12  | 4   | 0  | 0    | 13         | 0   |
| Karnataka                          | 11  | 6   | 0  | 0    | 29         | 0   |
| Kerala                             | 11  | 5   | 0  | 0    | 29         | 0   |
| Madhya Pradesh                     | 16  | 6   | 0  | 0    | 20         | 0   |
| Maharashtra                        | 11  | 6   | 0  | 0    | 25         | 0   |
| Manipur                            | 11  | 5   | 0  | 0    | 5          | 0   |
| Meghalaya                          | 11  | 5   | 0  | 0    | 6          | 0   |
| Mizoram                            | 12  | 5   | 0  | 0    | 6          | 0   |
| Nagaland                           | 9   | 4   | 0  | 0    | 5          | 0   |
| Odisha                             | 16  | 5   | 0  | 0    | 29         | 0   |
| Punjab                             | 11  | 6   | 0  | 0    | 29         | 0   |
| Rajasthan                          | 15  | 6   | 0  | 0    | 28         | 0   |
| Sikkim                             | 10  | 3   | 0  | 0    | 5          | 0   |
| Tamil Nadu                         | 11  | 6   | 0  | 0    | 29         | 0   |
| Telangana                          | 4   | 2   | 0  | 0    | 5          | 0   |
| Tripura                            | 11  | 5   | 0  | 0    | 3          | 0   |
| Uttar Pradesh                      | 16  | 6   | 0  | 0    | 17         | 0   |
| Uttarakhand                        | 11  | 4   | 0  | 0    | 3          | 0   |
| West Bengal                        | 12  | 6   | 0  | 0    | 23         | 0   |
| Union Territories other than Delhi | 4   | 1   | 0  | 0    | 5          | 0   |
| Nepal                              | 12  | 7   | 2  | 2    | 0          | 0   |
| Pakistan                           | 13  | 8   | 1  | 0    | 25         | 0   |
| China                              | 6   | 0   | 29 | 0    | 23         | 0   |
| North Korea                        | 0   | 0   | 1  | 0    | 0          | 0   |
| Taiwan                             | 0   | 0   | 0  | 0    | 62         | 0   |

**Appendix Table 3. Number of all-cause mortality data sources by type and location, 1950-2017**

| Geography                        | SBH | CBH | HH | SIBS | VR/SRS/DSP | DSS |
|----------------------------------|-----|-----|----|------|------------|-----|
| American Samoa                   | 1   | 0   | 0  | 0    | 52         | 0   |
| Federated States of Micronesia   | 3   | 0   | 0  | 0    | 1          | 0   |
| Fiji                             | 7   | 1   | 0  | 0    | 54         | 0   |
| Guam                             | 0   | 0   | 0  | 0    | 65         | 0   |
| Kiribati                         | 7   | 0   | 1  | 0    | 12         | 0   |
| Marshall Islands                 | 2   | 0   | 1  | 0    | 14         | 0   |
| Northern Mariana Islands         | 0   | 0   | 0  | 0    | 19         | 0   |
| Papua New Guinea                 | 6   | 1   | 2  | 0    | 2          | 0   |
| Samoa                            | 5   | 0   | 4  | 0    | 21         | 0   |
| Solomon Islands                  | 4   | 0   | 3  | 0    | 0          | 0   |
| Tonga                            | 3   | 0   | 2  | 0    | 18         | 0   |
| Vanuatu                          | 4   | 0   | 1  | 0    | 0          | 0   |
| Cambodia                         | 11  | 5   | 0  | 4    | 0          | 0   |
| Indonesia                        | 46  | 15  | 1  | 5    | 0          | 0   |
| Laos                             | 3   | 1   | 1  | 1    | 0          | 0   |
| Malaysia                         | 3   | 1   | 0  | 0    | 53         | 0   |
| Maldives                         | 6   | 1   | 0  | 0    | 38         | 0   |
| Mauritius                        | 0   | 0   | 0  | 0    | 67         | 0   |
| Myanmar                          | 6   | 1   | 1  | 1    | 1          | 0   |
| Philippines                      | 11  | 6   | 0  | 2    | 64         | 0   |
| Sri Lanka                        | 5   | 2   | 4  | 0    | 60         | 0   |
| Seychelles                       | 2   | 0   | 1  | 0    | 62         | 0   |
| Thailand                         | 10  | 2   | 0  | 0    | 66         | 0   |
| Timor-Leste                      | 8   | 6   | 0  | 4    | 0          | 0   |
| Vietnam                          | 16  | 3   | 2  | 0    | 0          | 2   |
| Angola                           | 4   | 2   | 0  | 1    | 0          | 0   |
| Central African Republic         | 5   | 1   | 1  | 1    | 0          | 0   |
| Congo                            | 4   | 3   | 2  | 2    | 0          | 0   |
| Democratic Republic of the Congo | 5   | 2   | 0  | 2    | 0          | 0   |
| Equatorial Guinea                | 1   | 0   | 1  | 0    | 0          | 0   |
| Gabon                            | 2   | 2   | 0  | 2    | 0          | 0   |
| Burundi                          | 9   | 3   | 1  | 1    | 0          | 0   |
| Comoros                          | 4   | 2   | 1  | 1    | 0          | 0   |
| Djibouti                         | 3   | 1   | 0  | 0    | 0          | 0   |
| Eritrea                          | 3   | 2   | 2  | 1    | 0          | 0   |
| Ethiopia                         | 8   | 4   | 1  | 4    | 0          | 5   |
| Kenya                            | 19  | 7   | 1  | 4    | 0          | 4   |
| Baringo                          | 14  | 5   | 0  | 1    | 0          | 0   |
| Bomet                            | 9   | 3   | 0  | 1    | 0          | 0   |
| Bungoma                          | 15  | 7   | 0  | 1    | 0          | 0   |
| Busia                            | 14  | 6   | 0  | 0    | 0          | 0   |
| Elgeyo-Marakwet                  | 14  | 6   | 0  | 1    | 0          | 0   |
| Embu                             | 16  | 7   | 0  | 0    | 0          | 0   |
| Garissa                          | 12  | 3   | 0  | 0    | 0          | 0   |
| HomaBay                          | 11  | 4   | 0  | 1    | 0          | 0   |
| Isiolo                           | 13  | 4   | 0  | 0    | 0          | 0   |
| Kajiado                          | 14  | 5   | 0  | 1    | 0          | 0   |
| Kakamega                         | 14  | 7   | 0  | 0    | 0          | 0   |
| Kericho                          | 15  | 6   | 0  | 0    | 0          | 0   |
| Kiambu                           | 15  | 6   | 0  | 1    | 0          | 0   |
| Kilifi                           | 15  | 6   | 0  | 1    | 0          | 0   |
| Kirinyaga                        | 14  | 6   | 0  | 0    | 0          | 0   |
| Kisii                            | 14  | 7   | 0  | 1    | 0          | 0   |

**Appendix Table 3. Number of all-cause mortality data sources by type and location, 1950-2017**

| Geography     | SBH | CBH | HH | SIBS | VR/SRS/DSP | DSS |
|---------------|-----|-----|----|------|------------|-----|
| Kisumu        | 14  | 7   | 0  | 1    | 0          | 0   |
| Kitui         | 17  | 7   | 0  | 1    | 0          | 0   |
| Kwale         | 14  | 6   | 0  | 1    | 0          | 0   |
| Laikipia      | 13  | 5   | 0  | 0    | 0          | 0   |
| Lamu          | 12  | 4   | 0  | 0    | 0          | 0   |
| Machakos      | 17  | 7   | 0  | 1    | 0          | 0   |
| Makueni       | 11  | 4   | 0  | 1    | 0          | 0   |
| Mandera       | 12  | 3   | 0  | 0    | 0          | 0   |
| Marsabit      | 11  | 4   | 0  | 0    | 0          | 0   |
| Meru          | 14  | 7   | 0  | 1    | 0          | 0   |
| Migori        | 9   | 4   | 0  | 1    | 0          | 0   |
| Mombasa       | 14  | 7   | 0  | 0    | 0          | 0   |
| Murang'a      | 14  | 6   | 0  | 1    | 0          | 0   |
| Nairobi       | 13  | 6   | 0  | 1    | 0          | 0   |
| Nakuru        | 14  | 6   | 0  | 1    | 0          | 0   |
| Nandi         | 15  | 6   | 0  | 1    | 0          | 0   |
| Narok         | 14  | 6   | 0  | 1    | 0          | 0   |
| Nyamira       | 10  | 4   | 0  | 1    | 0          | 0   |
| Nyandarua     | 13  | 6   | 0  | 1    | 0          | 0   |
| Nyeri         | 13  | 6   | 0  | 1    | 0          | 0   |
| Samburu       | 10  | 3   | 0  | 0    | 0          | 0   |
| Siaya         | 15  | 7   | 0  | 1    | 0          | 0   |
| TaitaTaveta   | 14  | 6   | 0  | 1    | 0          | 0   |
| TanaRiver     | 12  | 3   | 0  | 1    | 0          | 0   |
| TharakaNithi  | 10  | 4   | 0  | 1    | 0          | 0   |
| TransNzoia    | 14  | 6   | 0  | 0    | 0          | 0   |
| Turkana       | 11  | 4   | 0  | 1    | 0          | 0   |
| UasinGishu    | 14  | 6   | 0  | 1    | 0          | 0   |
| Vihiga        | 9   | 3   | 0  | 1    | 0          | 0   |
| Wajir         | 12  | 3   | 0  | 0    | 0          | 0   |
| WestPokot     | 14  | 5   | 0  | 1    | 0          | 0   |
| Madagascar    | 9   | 4   | 1  | 4    | 14         | 0   |
| Malawi        | 19  | 8   | 6  | 6    | 0          | 1   |
| Mozambique    | 8   | 4   | 1  | 3    | 0          | 1   |
| Rwanda        | 13  | 7   | 1  | 4    | 0          | 0   |
| Somalia       | 2   | 1   | 0  | 0    | 0          | 0   |
| South Sudan   | 2   | 1   | 0  | 0    | 0          | 0   |
| Tanzania      | 13  | 7   | 2  | 4    | 0          | 3   |
| Uganda        | 15  | 7   | 1  | 5    | 0          | 1   |
| Zambia        | 11  | 5   | 8  | 5    | 0          | 0   |
| Botswana      | 6   | 2   | 3  | 0    | 6          | 0   |
| Lesotho       | 8   | 4   | 0  | 3    | 1          | 0   |
| Namibia       | 6   | 4   | 2  | 4    | 0          | 0   |
| South Africa  | 6   | 1   | 4  | 1    | 30         | 3   |
| Swaziland     | 4   | 3   | 2  | 1    | 0          | 0   |
| Zimbabwe      | 9   | 8   | 2  | 6    | 2          | 0   |
| Benin         | 7   | 6   | 0  | 2    | 0          | 0   |
| Burkina Faso  | 10  | 4   | 4  | 3    | 0          | 2   |
| Cameroon      | 8   | 6   | 2  | 3    | 0          | 0   |
| Cape Verde    | 3   | 1   | 1  | 0    | 24         | 0   |
| Chad          | 5   | 3   | 0  | 3    | 0          | 0   |
| Cote d'Ivoire | 6   | 9   | 1  | 3    | 0          | 1   |
| The Gambia    | 6   | 1   | 1  | 0    | 0          | 1   |

**Appendix Table 3. Number of all-cause mortality data sources by type and location, 1950-2017**

| Geography             | SBH | CBH | HH | SIBS | VR/SRS/DSP | DSS |
|-----------------------|-----|-----|----|------|------------|-----|
| Ghana                 | 18  | 10  | 1  | 1    | 0          | 1   |
| Guinea                | 5   | 3   | 4  | 3    | 0          | 0   |
| Guinea-Bissau         | 4   | 1   | 0  | 1    | 0          | 0   |
| Liberia               | 7   | 5   | 1  | 2    | 0          | 0   |
| Mali                  | 10  | 6   | 4  | 4    | 0          | 0   |
| Mauritania            | 7   | 5   | 1  | 2    | 0          | 0   |
| Niger                 | 6   | 4   | 0  | 3    | 0          | 0   |
| Nigeria               | 16  | 6   | 0  | 0    | 0          | 0   |
| Sao Tome and Principe | 6   | 2   | 1  | 2    | 20         | 0   |
| Senegal               | 12  | 11  | 2  | 3    | 0          | 3   |
| Sierra Leone          | 6   | 2   | 1  | 2    | 5          | 0   |
| Togo                  | 7   | 3   | 0  | 2    | 0          | 0   |

Note: CBH: Complete birth history, SBH: Summary birth history, HH: Household survey, SIBS: Sibling History, VR: Vital Registration, SRS: Sample Registration System, DSP: Disease Surveillance Points, DSS: Demographic Surveillance System

**Appendix Table 4. Number of all-cause mortality data sources by type and year, 1950-2017**

| Year | SBH | CBH | HH | SIBS | VR/SRS/DSP | DSS |
|------|-----|-----|----|------|------------|-----|
| 1950 | 0   | 0   | 0  | 0    | 78         | 0   |
| 1951 | 0   | 0   | 0  | 0    | 77         | 0   |
| 1952 | 0   | 0   | 0  | 0    | 83         | 0   |
| 1953 | 0   | 0   | 1  | 0    | 82         | 0   |
| 1954 | 1   | 0   | 0  | 0    | 84         | 0   |
| 1955 | 0   | 1   | 0  | 0    | 91         | 0   |
| 1956 | 2   | 0   | 0  | 0    | 91         | 0   |
| 1957 | 0   | 1   | 0  | 0    | 91         | 0   |
| 1958 | 1   | 0   | 1  | 0    | 99         | 0   |
| 1959 | 0   | 1   | 0  | 0    | 147        | 0   |
| 1960 | 23  | 0   | 2  | 0    | 147        | 0   |
| 1961 | 3   | 1   | 1  | 0    | 147        | 0   |
| 1962 | 0   | 0   | 0  | 0    | 147        | 0   |
| 1963 | 1   | 1   | 0  | 0    | 148        | 0   |
| 1964 | 1   | 2   | 0  | 0    | 150        | 0   |
| 1965 | 1   | 1   | 0  | 0    | 148        | 0   |
| 1966 | 4   | 4   | 0  | 0    | 146        | 0   |
| 1967 | 1   | 2   | 1  | 0    | 144        | 0   |
| 1968 | 1   | 7   | 0  | 0    | 149        | 0   |
| 1969 | 42  | 3   | 0  | 0    | 175        | 0   |
| 1970 | 39  | 10  | 2  | 0    | 164        | 0   |
| 1971 | 39  | 3   | 3  | 0    | 165        | 0   |
| 1972 | 3   | 13  | 0  | 0    | 165        | 0   |
| 1973 | 8   | 4   | 1  | 0    | 163        | 1   |
| 1974 | 7   | 22  | 3  | 0    | 167        | 0   |
| 1975 | 13  | 13  | 0  | 0    | 167        | 0   |
| 1976 | 14  | 24  | 2  | 0    | 170        | 0   |
| 1977 | 8   | 11  | 1  | 0    | 173        | 0   |
| 1978 | 10  | 29  | 0  | 0    | 180        | 0   |
| 1979 | 48  | 10  | 1  | 0    | 270        | 0   |
| 1980 | 112 | 28  | 1  | 0    | 299        | 0   |
| 1981 | 17  | 6   | 2  | 0    | 465        | 0   |
| 1982 | 39  | 26  | 8  | 0    | 467        | 0   |
| 1983 | 5   | 7   | 1  | 0    | 466        | 0   |
| 1984 | 7   | 28  | 3  | 0    | 471        | 0   |
| 1985 | 44  | 11  | 1  | 0    | 453        | 0   |
| 1986 | 33  | 43  | 1  | 0    | 468        | 0   |
| 1987 | 38  | 42  | 7  | 0    | 473        | 0   |
| 1988 | 48  | 57  | 4  | 1    | 450        | 0   |
| 1989 | 54  | 16  | 33 | 1    | 545        | 0   |
| 1990 | 149 | 40  | 2  | 1    | 552        | 4   |
| 1991 | 113 | 44  | 7  | 7    | 552        | 4   |
| 1992 | 148 | 164 | 20 | 3    | 546        | 4   |
| 1993 | 169 | 34  | 3  | 5    | 545        | 6   |
| 1994 | 134 | 43  | 4  | 35   | 550        | 7   |

**Appendix Table 4. Number of all-cause mortality data sources by type and year, 1950-2017**

| Year | SBH | CBH | HH  | SIBS | VR/SRS/DSP | DSS |
|------|-----|-----|-----|------|------------|-----|
| 1995 | 105 | 51  | 8   | 7    | 591        | 7   |
| 1996 | 120 | 46  | 39  | 4    | 627        | 8   |
| 1997 | 83  | 73  | 37  | 49   | 636        | 9   |
| 1998 | 122 | 100 | 49  | 3    | 639        | 9   |
| 1999 | 295 | 55  | 63  | 11   | 648        | 10  |
| 2000 | 288 | 86  | 104 | 15   | 653        | 11  |
| 2001 | 177 | 37  | 39  | 2    | 682        | 11  |
| 2002 | 69  | 108 | 74  | 36   | 685        | 11  |
| 2003 | 242 | 42  | 64  | 7    | 655        | 14  |
| 2004 | 78  | 109 | 89  | 10   | 706        | 16  |
| 2005 | 321 | 137 | 108 | 7    | 707        | 18  |
| 2006 | 265 | 64  | 86  | 5    | 709        | 21  |
| 2007 | 179 | 62  | 69  | 38   | 709        | 21  |
| 2008 | 203 | 77  | 69  | 4    | 710        | 23  |
| 2009 | 259 | 19  | 70  | 10   | 763        | 27  |
| 2010 | 263 | 20  | 107 | 6    | 759        | 31  |
| 2011 | 262 | 66  | 115 | 7    | 695        | 31  |
| 2012 | 160 | 36  | 97  | 39   | 703        | 30  |
| 2013 | 147 | 38  | 65  | 43   | 740        | 25  |
| 2014 | 112 | 88  | 66  | 13   | 711        | 22  |
| 2015 | 142 | 49  | 34  | 3    | 723        | 2   |
| 2016 | 95  | 33  | 38  | 11   | 497        | 0   |
| 2017 | 2   | 0   | 3   | 0    | 1          | 0   |

Note: CBH: Complete birth history, SBH: Summary birth history, HH: Household survey, SIBS: Sibling History, VR: Vital Registration, SRS: Sample Registration System, DSP: Disease Surveillance Points, DSS: Demographic Surveillance System



**Appendix Table 5. Under-5 mortality reference sources by source date and location, 1950-2017**

| Location   | Year range of data | Reference source                       | Data type  |
|------------|--------------------|----------------------------------------|------------|
| Armenia    | 1958-1958          | Vital Registration                     | VR/SRS/DSP |
| Armenia    | 1969-1969          | Vital Registration                     | VR/SRS/DSP |
| Armenia    | 1975-2015          | Standard demographic and health survey | CBH        |
| Armenia    | 1976-2000          | Census                                 | SBH        |
| Armenia    | 1976-2015          | Standard demographic and health survey | SBH        |
| Armenia    | 1978-1978          | Vital Registration                     | VR/SRS/DSP |
| Armenia    | 1981-1987          | Vital Registration                     | VR/SRS/DSP |
| Armenia    | 1989-2016          | Vital Registration                     | VR/SRS/DSP |
| Armenia    | 2002-2002          | Census                                 | SBH        |
| Armenia    | 2005-2005          | Census                                 | SBH        |
| Armenia    | 2008-2008          | Census                                 | SBH        |
| Azerbaijan | 1958-1958          | Vital Registration                     | VR/SRS/DSP |
| Azerbaijan | 1969-1969          | Vital Registration                     | VR/SRS/DSP |
| Azerbaijan | 1976-2000          | Multiple Indicator Cluster Survey      | SBH        |
| Azerbaijan | 1978-1978          | Vital Registration                     | VR/SRS/DSP |
| Azerbaijan | 1981-2006          | Standard demographic and health survey | CBH        |
| Azerbaijan | 1981-2016          | Vital Registration                     | VR/SRS/DSP |
| Azerbaijan | 1982-2006          | Standard demographic and health survey | SBH        |
| Azerbaijan | 1988-1988          | Reproductive Health Survey             | HH         |
| Azerbaijan | 1990-1990          | Census                                 | SBH        |
| Azerbaijan | 1991-1991          | Other demographic and health survey    | SBH        |
| Azerbaijan | 1993-1993          | Census                                 | SBH        |
| Azerbaijan | 1993-1993          | Reproductive Health Survey             | HH         |
| Azerbaijan | 1994-1994          | Other demographic and health survey    | SBH        |
| Azerbaijan | 1997-1997          | Census                                 | SBH        |
| Azerbaijan | 1998-1998          | Other demographic and health survey    | SBH        |
| Azerbaijan | 1998-1998          | Reproductive Health Survey             | HH         |
| Azerbaijan | 1999-1999          | Other demographic and health survey    | HH         |
| Azerbaijan | 2000-2000          | Census                                 | SBH        |
| Azerbaijan | 2002-2002          | Other demographic and health survey    | SBH        |
| Azerbaijan | 2003-2003          | Census                                 | SBH        |
| Azerbaijan | 2004-2004          | Other demographic and health survey    | HH         |
| Azerbaijan | 2005-2005          | Census                                 | SBH        |
| Azerbaijan | 2005-2005          | Other demographic and health survey    | SBH        |
| Azerbaijan | 2007-2007          | Other demographic and health survey    | SBH        |
| Azerbaijan | 2009-2009          | Other demographic and health survey    | HH         |
| Georgia    | 1958-1958          | Vital Registration                     | VR/SRS/DSP |
| Georgia    | 1969-1969          | Vital Registration                     | VR/SRS/DSP |
| Georgia    | 1975-2004          | Reproductive Health Survey             | SBH        |
| Georgia    | 1978-1978          | Vital Registration                     | VR/SRS/DSP |
| Georgia    | 1978-2011          | Reproductive Health Survey             | CBH        |
| Georgia    | 1981-1992          | Vital Registration                     | VR/SRS/DSP |
| Georgia    | 1981-2005          | Multiple Indicator Cluster Survey      | SBH        |
| Georgia    | 1994-2016          | Vital Registration                     | VR/SRS/DSP |
| Georgia    | 2007-2007          | Reproductive Health Survey             | HH         |
| Kazakhstan | 1958-1958          | Vital Registration                     | VR/SRS/DSP |
| Kazakhstan | 1969-1969          | Vital Registration                     | VR/SRS/DSP |
| Kazakhstan | 1969-1969          | Census                                 | SBH        |

**Appendix Table 5. Under-5 mortality reference sources by source date and location, 1950-2017**

| Location   | Year range of data | Reference source                       | Data type  |
|------------|--------------------|----------------------------------------|------------|
| Kazakhstan | 1971-1995          | Living Standards Measurement Study     | SBH        |
| Kazakhstan | 1971-1999          | Standard demographic and health survey | SBH        |
| Kazakhstan | 1972-1995          | Standard demographic and health survey | CBH        |
| Kazakhstan | 1973-1973          | Census                                 | SBH        |
| Kazakhstan | 1976-1976          | Census                                 | SBH        |
| Kazakhstan | 1978-1978          | Vital Registration                     | VR/SRS/DSP |
| Kazakhstan | 1979-1980          | Census                                 | SBH        |
| Kazakhstan | 1981-2010          | Multiple Indicator Cluster Survey      | SBH        |
| Kazakhstan | 1981-2015          | Vital Registration                     | VR/SRS/DSP |
| Kazakhstan | 1982-1983          | Census                                 | SBH        |
| Kazakhstan | 1986-1986          | Census                                 | SBH        |
| Kazakhstan | 1988-1988          | Census                                 | SBH        |
| Kazakhstan | 1990-1990          | Census                                 | SBH        |
| Kazakhstan | 1992-1993          | Census                                 | SBH        |
| Kazakhstan | 1995-1996          | Census                                 | SBH        |
| Kazakhstan | 1998-1999          | Standard demographic and health survey | CBH        |
| Kazakhstan | 2000-2000          | Census                                 | SBH        |
| Kazakhstan | 2003-2003          | Census                                 | SBH        |
| Kazakhstan | 2006-2006          | Census                                 | SBH        |
| Kyrgyzstan | 1958-1958          | Vital Registration                     | VR/SRS/DSP |
| Kyrgyzstan | 1968-1992          | Living Standards Measurement Study     | SBH        |
| Kyrgyzstan | 1969-1969          | Vital Registration                     | VR/SRS/DSP |
| Kyrgyzstan | 1973-2012          | Standard demographic and health survey | SBH        |
| Kyrgyzstan | 1974-2008          | Census                                 | SBH        |
| Kyrgyzstan | 1974-2012          | Standard demographic and health survey | CBH        |
| Kyrgyzstan | 1977-1998          | Living Standards Measurement Study     | CBH        |
| Kyrgyzstan | 1978-1978          | Vital Registration                     | VR/SRS/DSP |
| Kyrgyzstan | 1981-2013          | Multiple Indicator Cluster Survey      | SBH        |
| Kyrgyzstan | 1981-2016          | Vital Registration                     | VR/SRS/DSP |
| Kyrgyzstan | 1988-2013          | Multiple Indicator Cluster Survey      | CBH        |
| Mongolia   | 1964-1988          | Census                                 | SBH        |
| Mongolia   | 1965-1965          | Vital Registration                     | VR/SRS/DSP |
| Mongolia   | 1970-1970          | Vital Registration                     | VR/SRS/DSP |
| Mongolia   | 1974-1999          | Reproductive Health Survey             | CBH        |
| Mongolia   | 1975-1975          | Vital Registration                     | VR/SRS/DSP |
| Mongolia   | 1975-2013          | Multiple Indicator Cluster Survey      | SBH        |
| Mongolia   | 1979-2008          | Reproductive Health Survey             | SBH        |
| Mongolia   | 1980-1980          | Vital Registration                     | VR/SRS/DSP |
| Mongolia   | 1985-1985          | Vital Registration                     | VR/SRS/DSP |
| Mongolia   | 1986-1986          | Reproductive Health Survey             | HH         |
| Mongolia   | 1986-2013          | Multiple Indicator Cluster Survey      | CBH        |
| Mongolia   | 1987-1990          | Vital Registration                     | VR/SRS/DSP |
| Mongolia   | 1991-1991          | Reproductive Health Survey             | HH         |
| Mongolia   | 1994-2010          | Vital Registration                     | VR/SRS/DSP |
| Mongolia   | 1996-1996          | Reproductive Health Survey             | HH         |
| Mongolia   | 2013-2014          | Vital Registration                     | VR/SRS/DSP |
| Tajikistan | 1958-1958          | Vital Registration                     | VR/SRS/DSP |
| Tajikistan | 1969-1969          | Vital Registration                     | VR/SRS/DSP |

**Appendix Table 5. Under-5 mortality reference sources by source date and location, 1950-2017**

| Location     | Year range of data | Reference source                       | Data type  |
|--------------|--------------------|----------------------------------------|------------|
| Tajikistan   | 1971-1971          | Census                                 | SBH        |
| Tajikistan   | 1974-2006          | Living Standards Measurement Study     | SBH        |
| Tajikistan   | 1975-1975          | Census                                 | SBH        |
| Tajikistan   | 1976-2005          | Multiple Indicator Cluster Survey      | SBH        |
| Tajikistan   | 1978-1978          | Vital Registration                     | VR/SRS/DSP |
| Tajikistan   | 1978-1978          | Census                                 | SBH        |
| Tajikistan   | 1981-1981          | Census                                 | SBH        |
| Tajikistan   | 1981-1992          | Vital Registration                     | VR/SRS/DSP |
| Tajikistan   | 1983-1983          | Census                                 | SBH        |
| Tajikistan   | 1986-1986          | Census                                 | SBH        |
| Tajikistan   | 1987-2012          | Standard demographic and health survey | CBH        |
| Tajikistan   | 1988-2012          | Standard demographic and health survey | SBH        |
| Tajikistan   | 1989-1989          | Other survey                           | HH         |
| Tajikistan   | 1994-2014          | Vital Registration                     | VR/SRS/DSP |
| Tajikistan   | 1995-1995          | Other survey                           | HH         |
| Tajikistan   | 2000-2000          | Other survey                           | HH         |
| Tajikistan   | 2005-2005          | Standard demographic and health survey | HH         |
| Tajikistan   | 2005-2009          | Other survey                           | HH         |
| Tajikistan   | 2010-2010          | Standard demographic and health survey | HH         |
| Tajikistan   | 2015-2015          | Standard demographic and health survey | HH         |
| Tajikistan   | 2016-2016          | Vital Registration                     | VR/SRS/DSP |
| Turkmenistan | 1958-1958          | Vital Registration                     | VR/SRS/DSP |
| Turkmenistan | 1969-1969          | Vital Registration                     | VR/SRS/DSP |
| Turkmenistan | 1978-1978          | Vital Registration                     | VR/SRS/DSP |
| Turkmenistan | 1978-1978          | Standard demographic and health survey | HH         |
| Turkmenistan | 1981-1981          | Standard demographic and health survey | SBH        |
| Turkmenistan | 1981-1999          | Vital Registration                     | VR/SRS/DSP |
| Turkmenistan | 1981-2015          | Multiple Indicator Cluster Survey      | SBH        |
| Turkmenistan | 1983-1983          | Standard demographic and health survey | HH         |
| Turkmenistan | 1985-1985          | Standard demographic and health survey | SBH        |
| Turkmenistan | 1987-1988          | Standard demographic and health survey | HH         |
| Turkmenistan | 1988-1988          | Standard demographic and health survey | SBH        |
| Turkmenistan | 1991-1991          | Standard demographic and health survey | SBH        |
| Turkmenistan | 1992-1993          | Standard demographic and health survey | HH         |
| Turkmenistan | 1992-2015          | Multiple Indicator Cluster Survey      | CBH        |
| Turkmenistan | 1994-1994          | Standard demographic and health survey | SBH        |
| Turkmenistan | 1997-1997          | Standard demographic and health survey | SBH        |
| Turkmenistan | 1997-1998          | Standard demographic and health survey | HH         |
| Turkmenistan | 2012-2013          | Vital Registration                     | VR/SRS/DSP |
| Turkmenistan | 2015-2015          | Vital Registration                     | VR/SRS/DSP |
| Uzbekistan   | 1958-1958          | Vital Registration                     | VR/SRS/DSP |
| Uzbekistan   | 1969-1969          | Vital Registration                     | VR/SRS/DSP |
| Uzbekistan   | 1972-1996          | Standard demographic and health survey | SBH        |
| Uzbekistan   | 1973-1996          | Standard demographic and health survey | CBH        |
| Uzbekistan   | 1976-2005          | Multiple Indicator Cluster Survey      | SBH        |
| Uzbekistan   | 1977-2002          | Other demographic and health survey    | CBH        |
| Uzbekistan   | 1978-1978          | Vital Registration                     | VR/SRS/DSP |
| Uzbekistan   | 1978-2002          | Other demographic and health survey    | SBH        |

**Appendix Table 5. Under-5 mortality reference sources by source date and location, 1950-2017**

| Location               | Year range of data | Reference source                       | Data type  |
|------------------------|--------------------|----------------------------------------|------------|
| Uzbekistan             | 1981-2014          | Vital Registration                     | VR/SRS/DSP |
| Albania                | 1950-1950          | Vital Registration                     | VR/SRS/DSP |
| Albania                | 1955-1955          | Vital Registration                     | VR/SRS/DSP |
| Albania                | 1957-1964          | Vital Registration                     | VR/SRS/DSP |
| Albania                | 1978-2003          | Multiple Indicator Cluster Survey      | SBH        |
| Albania                | 1983-2000          | Reproductive Health Survey             | SBH        |
| Albania                | 1983-2002          | Reproductive Health Survey             | CBH        |
| Albania                | 1983-2008          | Standard demographic and health survey | CBH        |
| Albania                | 1986-2006          | Standard demographic and health survey | SBH        |
| Albania                | 1987-2010          | Vital Registration                     | VR/SRS/DSP |
| Albania                | 1991-1991          | Census                                 | SBH        |
| Albania                | 1995-1995          | Census                                 | SBH        |
| Albania                | 1999-1999          | Census                                 | SBH        |
| Albania                | 2002-2002          | Census                                 | SBH        |
| Albania                | 2006-2006          | Census                                 | SBH        |
| Albania                | 2008-2008          | Census                                 | SBH        |
| Bosnia and Herzegovina | 1950-1991          | Vital Registration                     | VR/SRS/DSP |
| Bosnia and Herzegovina | 1998-2016          | Vital Registration                     | VR/SRS/DSP |
| Bulgaria               | 1950-2016          | Vital Registration                     | VR/SRS/DSP |
| Bulgaria               | 1951-1951          | Census                                 | SBH        |
| Bulgaria               | 1954-1955          | Census                                 | SBH        |
| Bulgaria               | 1957-1957          | Census                                 | SBH        |
| Bulgaria               | 1959-1959          | Census                                 | SBH        |
| Bulgaria               | 1961-1961          | Census                                 | SBH        |
| Bulgaria               | 1965-1965          | Census                                 | SBH        |
| Bulgaria               | 1969-1969          | Census                                 | SBH        |
| Bulgaria               | 1971-1971          | Census                                 | SBH        |
| Bulgaria               | 1974-1974          | Living Standards Measurement Study     | SBH        |
| Bulgaria               | 1976-1976          | Living Standards Measurement Study     | SBH        |
| Bulgaria               | 1978-1979          | Living Standards Measurement Study     | SBH        |
| Bulgaria               | 1982-1983          | Living Standards Measurement Study     | SBH        |
| Bulgaria               | 1985-1985          | Living Standards Measurement Study     | SBH        |
| Bulgaria               | 1987-1987          | Living Standards Measurement Study     | SBH        |
| Bulgaria               | 1989-1989          | Living Standards Measurement Study     | SBH        |
| Bulgaria               | 1991-1991          | Living Standards Measurement Study     | SBH        |
| Bulgaria               | 1993-1993          | Living Standards Measurement Study     | SBH        |
| Croatia                | 1950-2013          | Vital Registration                     | VR/SRS/DSP |
| Croatia                | 2015-2016          | Vital Registration                     | VR/SRS/DSP |
| Czech Republic         | 1950-2016          | Vital Registration                     | VR/SRS/DSP |
| Hungary                | 1950-2016          | Vital Registration                     | VR/SRS/DSP |
| Hungary                | 1951-1951          | Census                                 | SBH        |
| Hungary                | 1954-1954          | Census                                 | SBH        |
| Hungary                | 1956-1956          | Census                                 | SBH        |
| Macedonia              | 1950-2016          | Vital Registration                     | VR/SRS/DSP |
| Macedonia              | 1983-2003          | Multiple Indicator Cluster Survey      | SBH        |
| Macedonia              | 2005-2005          | Multiple Indicator Cluster Survey      | SBH        |
| Macedonia              | 2008-2008          | Multiple Indicator Cluster Survey      | SBH        |
| Montenegro             | 1950-1959          | Vital Registration                     | VR/SRS/DSP |

**Appendix Table 5. Under-5 mortality reference sources by source date and location, 1950-2017**

| Location   | Year range of data | Reference source                   | Data type  |
|------------|--------------------|------------------------------------|------------|
| Montenegro | 1961-1969          | Vital Registration                 | VR/SRS/DSP |
| Montenegro | 1971-1979          | Vital Registration                 | VR/SRS/DSP |
| Montenegro | 1981-1989          | Vital Registration                 | VR/SRS/DSP |
| Montenegro | 1989-1996          | Multiple Indicator Cluster Survey  | SBH        |
| Montenegro | 1991-1991          | Vital Registration                 | VR/SRS/DSP |
| Montenegro | 1995-1996          | Vital Registration                 | VR/SRS/DSP |
| Montenegro | 2000-2010          | Multiple Indicator Cluster Survey  | SBH        |
| Montenegro | 2000-2016          | Vital Registration                 | VR/SRS/DSP |
| Poland     | 1950-1950          | Census                             | SBH        |
| Poland     | 1950-2016          | Vital Registration                 | VR/SRS/DSP |
| Poland     | 1953-1953          | Census                             | SBH        |
| Poland     | 1957-1957          | Census                             | SBH        |
| Poland     | 1961-1961          | Census                             | SBH        |
| Poland     | 1964-1964          | Census                             | SBH        |
| Poland     | 1966-1966          | Census                             | SBH        |
| Romania    | 1950-1995          | Living Standards Measurement Study | CBH        |
| Romania    | 1953-1953          | Census                             | SBH        |
| Romania    | 1956-1956          | Census                             | SBH        |
| Romania    | 1956-2016          | Vital Registration                 | VR/SRS/DSP |
| Romania    | 1960-1960          | Census                             | SBH        |
| Romania    | 1962-1962          | Census                             | SBH        |
| Romania    | 1964-1964          | Census                             | SBH        |
| Romania    | 1968-1968          | Census                             | SBH        |
| Romania    | 1971-1971          | Census                             | SBH        |
| Romania    | 1972-1972          | Living Standards Measurement Study | SBH        |
| Romania    | 1973-1973          | Census                             | SBH        |
| Romania    | 1974-1974          | Living Standards Measurement Study | SBH        |
| Romania    | 1975-1975          | Census                             | SBH        |
| Romania    | 1978-1978          | Living Standards Measurement Study | SBH        |
| Romania    | 1979-1979          | Census                             | SBH        |
| Romania    | 1981-1981          | Living Standards Measurement Study | SBH        |
| Romania    | 1983-1983          | Census                             | SBH        |
| Romania    | 1985-1985          | Living Standards Measurement Study | SBH        |
| Romania    | 1986-1986          | Census                             | SBH        |
| Romania    | 1987-1987          | Reproductive Health Survey         | HH         |
| Romania    | 1988-1988          | Census                             | SBH        |
| Romania    | 1988-1988          | Living Standards Measurement Study | SBH        |
| Romania    | 1992-1992          | Reproductive Health Survey         | HH         |
| Romania    | 1997-1997          | Reproductive Health Survey         | HH         |
| Serbia     | 1950-1952          | Vital Registration                 | VR/SRS/DSP |
| Serbia     | 1953-1953          | Census                             | HH         |
| Serbia     | 1954-1960          | Vital Registration                 | VR/SRS/DSP |
| Serbia     | 1961-1961          | Census                             | HH         |
| Serbia     | 1962-1970          | Vital Registration                 | VR/SRS/DSP |
| Serbia     | 1971-1971          | Census                             | HH         |
| Serbia     | 1972-1990          | Vital Registration                 | VR/SRS/DSP |
| Serbia     | 1984-2011          | Multiple Indicator Cluster Survey  | SBH        |
| Serbia     | 1991-1991          | Census                             | HH         |

**Appendix Table 5. Under-5 mortality reference sources by source date and location, 1950-2017**

| Location           | Year range of data | Reference source                       | Data type  |
|--------------------|--------------------|----------------------------------------|------------|
| Serbia             | 1995-1997          | Vital Registration                     | VR/SRS/DSP |
| Serbia             | 2008-2016          | Vital Registration                     | VR/SRS/DSP |
| Slovakia           | 1950-2016          | Vital Registration                     | VR/SRS/DSP |
| Slovenia           | 1950-2016          | Vital Registration                     | VR/SRS/DSP |
| Belarus            | 1958-2016          | Vital Registration                     | VR/SRS/DSP |
| Belarus            | 1969-1969          | Census                                 | SBH        |
| Belarus            | 1972-1972          | Census                                 | SBH        |
| Belarus            | 1976-1976          | Census                                 | SBH        |
| Belarus            | 1980-1980          | Census                                 | SBH        |
| Belarus            | 1981-2003          | Multiple Indicator Cluster Survey      | SBH        |
| Belarus            | 1983-1983          | Census                                 | SBH        |
| Belarus            | 1986-1986          | Census                                 | SBH        |
| Estonia            | 1959-2015          | Vital Registration                     | VR/SRS/DSP |
| Estonia            | 1968-1968          | Census                                 | SBH        |
| Estonia            | 1972-1972          | Census                                 | SBH        |
| Estonia            | 1976-1976          | Census                                 | SBH        |
| Estonia            | 1980-1980          | Census                                 | SBH        |
| Estonia            | 1983-1983          | Census                                 | SBH        |
| Estonia            | 1985-1985          | Census                                 | SBH        |
| Latvia             | 1960-2016          | Vital Registration                     | VR/SRS/DSP |
| Latvia             | 1968-1968          | Census                                 | SBH        |
| Latvia             | 1972-1972          | Census                                 | SBH        |
| Latvia             | 1976-1976          | Census                                 | SBH        |
| Latvia             | 1979-1979          | Census                                 | SBH        |
| Latvia             | 1983-1983          | Census                                 | SBH        |
| Latvia             | 1985-1985          | Census                                 | SBH        |
| Lithuania          | 1959-2016          | Vital Registration                     | VR/SRS/DSP |
| Moldova            | 1958-1958          | Vital Registration                     | VR/SRS/DSP |
| Moldova            | 1969-1969          | Vital Registration                     | VR/SRS/DSP |
| Moldova            | 1969-1969          | Census                                 | SBH        |
| Moldova            | 1972-1972          | Census                                 | SBH        |
| Moldova            | 1976-1976          | Census                                 | SBH        |
| Moldova            | 1978-1978          | Vital Registration                     | VR/SRS/DSP |
| Moldova            | 1979-1995          | Reproductive Health Survey             | SBH        |
| Moldova            | 1980-1980          | Census                                 | SBH        |
| Moldova            | 1980-2005          | Standard demographic and health survey | CBH        |
| Moldova            | 1980-2016          | Vital Registration                     | VR/SRS/DSP |
| Moldova            | 1981-2003          | Standard demographic and health survey | SBH        |
| Moldova            | 1983-1983          | Census                                 | SBH        |
| Moldova            | 1985-1985          | Census                                 | SBH        |
| Moldova            | 1986-2011          | Multiple Indicator Cluster Survey      | CBH        |
| Moldova            | 1988-2009          | Multiple Indicator Cluster Survey      | SBH        |
| Russian Federation | 1959-2016          | Vital Registration                     | VR/SRS/DSP |
| Russian Federation | 1969-1969          | Census                                 | SBH        |
| Russian Federation | 1972-1972          | Census                                 | SBH        |
| Russian Federation | 1976-1976          | Census                                 | SBH        |
| Russian Federation | 1979-1979          | Census                                 | SBH        |
| Russian Federation | 1983-1983          | Census                                 | SBH        |

**Appendix Table 5. Under-5 mortality reference sources by source date and location, 1950-2017**

| Location           | Year range of data | Reference source                       | Data type  |
|--------------------|--------------------|----------------------------------------|------------|
| Russian Federation | 1985-1985          | Census                                 | SBH        |
| Ukraine            | 1959-2016          | Vital Registration                     | VR/SRS/DSP |
| Ukraine            | 1969-1969          | Census                                 | SBH        |
| Ukraine            | 1972-1972          | Census                                 | SBH        |
| Ukraine            | 1976-1976          | Census                                 | SBH        |
| Ukraine            | 1978-1999          | Reproductive Health Survey             | CBH        |
| Ukraine            | 1979-1980          | Census                                 | SBH        |
| Ukraine            | 1982-2007          | Standard demographic and health survey | CBH        |
| Ukraine            | 1983-1985          | Census                                 | SBH        |
| Ukraine            | 1983-2005          | Standard demographic and health survey | SBH        |
| Ukraine            | 1984-2010          | Multiple Indicator Cluster Survey      | SBH        |
| Ukraine            | 1988-1988          | Census                                 | SBH        |
| Ukraine            | 1991-1991          | Census                                 | SBH        |
| Ukraine            | 1995-1995          | Census                                 | SBH        |
| Ukraine            | 1997-1997          | Census                                 | SBH        |
| Australia          | 1950-2015          | Vital Registration                     | VR/SRS/DSP |
| New Zealand        | 1950-2016          | Vital Registration                     | VR/SRS/DSP |
| Brunei             | 1950-1959          | Vital Registration                     | VR/SRS/DSP |
| Brunei             | 1951-1951          | Census                                 | SBH        |
| Brunei             | 1954-1955          | Census                                 | SBH        |
| Brunei             | 1964-1978          | Vital Registration                     | VR/SRS/DSP |
| Brunei             | 1982-1992          | Vital Registration                     | VR/SRS/DSP |
| Brunei             | 1995-2015          | Vital Registration                     | VR/SRS/DSP |
| Japan              | 1950-2015          | Vital Registration                     | VR/SRS/DSP |
| Aichi              | 1979-2015          | Vital Registration                     | VR/SRS/DSP |
| Akita              | 1979-2015          | Vital Registration                     | VR/SRS/DSP |
| Aomori             | 1979-2015          | Vital Registration                     | VR/SRS/DSP |
| Chiba              | 1979-2015          | Vital Registration                     | VR/SRS/DSP |
| Ehime              | 1979-2015          | Vital Registration                     | VR/SRS/DSP |
| Fukui              | 1979-2015          | Vital Registration                     | VR/SRS/DSP |
| Fukuoka            | 1979-2015          | Vital Registration                     | VR/SRS/DSP |
| Fukushima          | 1979-2015          | Vital Registration                     | VR/SRS/DSP |
| Gifu               | 1979-2015          | Vital Registration                     | VR/SRS/DSP |
| Gunma              | 1979-2015          | Vital Registration                     | VR/SRS/DSP |
| Hiroshima          | 1979-2015          | Vital Registration                     | VR/SRS/DSP |
| Hokkaidō           | 1979-2015          | Vital Registration                     | VR/SRS/DSP |
| Hyōgo              | 1979-1994          | Vital Registration                     | VR/SRS/DSP |
| Hyōgo              | 1996-2015          | Vital Registration                     | VR/SRS/DSP |
| Ibaraki            | 1979-2015          | Vital Registration                     | VR/SRS/DSP |
| Ishikawa           | 1979-2015          | Vital Registration                     | VR/SRS/DSP |
| Iwate              | 1979-2010          | Vital Registration                     | VR/SRS/DSP |
| Iwate              | 2012-2015          | Vital Registration                     | VR/SRS/DSP |
| Kagawa             | 1979-2015          | Vital Registration                     | VR/SRS/DSP |
| Kagoshima          | 1979-2015          | Vital Registration                     | VR/SRS/DSP |
| Kanagawa           | 1979-2015          | Vital Registration                     | VR/SRS/DSP |
| Kōchi              | 1979-2015          | Vital Registration                     | VR/SRS/DSP |
| Kumamoto           | 1979-2015          | Vital Registration                     | VR/SRS/DSP |
| Kyōto              | 1979-2015          | Vital Registration                     | VR/SRS/DSP |

**Appendix Table 5. Under-5 mortality reference sources by source date and location, 1950-2017**

| Location      | Year range of data | Reference source       | Data type  |
|---------------|--------------------|------------------------|------------|
| Mie           | 1979-2015          | Vital Registration     | VR/SRS/DSP |
| Miyagi        | 1979-2010          | Vital Registration     | VR/SRS/DSP |
| Miyagi        | 2012-2015          | Vital Registration     | VR/SRS/DSP |
| Miyazaki      | 1979-2015          | Vital Registration     | VR/SRS/DSP |
| Nagano        | 1979-2015          | Vital Registration     | VR/SRS/DSP |
| Nagasaki      | 1979-2015          | Vital Registration     | VR/SRS/DSP |
| Nara          | 1979-2015          | Vital Registration     | VR/SRS/DSP |
| Niigata       | 1979-2015          | Vital Registration     | VR/SRS/DSP |
| Ōita          | 1979-2015          | Vital Registration     | VR/SRS/DSP |
| Okayama       | 1979-2015          | Vital Registration     | VR/SRS/DSP |
| Okinawa       | 1979-2015          | Vital Registration     | VR/SRS/DSP |
| Ōsaka         | 1979-2015          | Vital Registration     | VR/SRS/DSP |
| Saga          | 1979-2015          | Vital Registration     | VR/SRS/DSP |
| Saitama       | 1979-2015          | Vital Registration     | VR/SRS/DSP |
| Shiga         | 1979-2015          | Vital Registration     | VR/SRS/DSP |
| Shimane       | 1979-2015          | Vital Registration     | VR/SRS/DSP |
| Shizuoka      | 1979-2015          | Vital Registration     | VR/SRS/DSP |
| Tochigi       | 1979-2015          | Vital Registration     | VR/SRS/DSP |
| Tokushima     | 1979-2015          | Vital Registration     | VR/SRS/DSP |
| Tōkyō         | 1979-2015          | Vital Registration     | VR/SRS/DSP |
| Tottori       | 1979-2015          | Vital Registration     | VR/SRS/DSP |
| Toyama        | 1979-2015          | Vital Registration     | VR/SRS/DSP |
| Wakayama      | 1979-2015          | Vital Registration     | VR/SRS/DSP |
| Yamagata      | 1979-2015          | Vital Registration     | VR/SRS/DSP |
| Yamaguchi     | 1979-2015          | Vital Registration     | VR/SRS/DSP |
| Yamanashi     | 1979-2015          | Vital Registration     | VR/SRS/DSP |
| South Korea   | 1954-1974          | World Fertility Survey | CBH        |
| South Korea   | 1954-1974          | World Fertility Survey | SBH        |
| South Korea   | 1955-1956          | Census                 | SBH        |
| South Korea   | 1958-1959          | Census                 | SBH        |
| South Korea   | 1961-1964          | Census                 | SBH        |
| South Korea   | 1967-1974          | Census                 | SBH        |
| South Korea   | 1977-1977          | Census                 | SBH        |
| South Korea   | 1977-2016          | Vital Registration     | VR/SRS/DSP |
| South Korea   | 1980-1981          | Census                 | SBH        |
| South Korea   | 1983-1984          | Census                 | SBH        |
| South Korea   | 1987-1987          | Census                 | SBH        |
| Singapore     | 1950-2016          | Vital Registration     | VR/SRS/DSP |
| Canada        | 1950-2016          | Vital Registration     | VR/SRS/DSP |
| Greenland     | 1952-1965          | Vital Registration     | VR/SRS/DSP |
| Greenland     | 1967-1987          | Vital Registration     | VR/SRS/DSP |
| Greenland     | 1990-1991          | Vital Registration     | VR/SRS/DSP |
| Greenland     | 1994-2016          | Vital Registration     | VR/SRS/DSP |
| United States | 1950-2016          | Vital Registration     | VR/SRS/DSP |
| Alabama       | 1959-2015          | Vital Registration     | VR/SRS/DSP |
| Alaska        | 1959-2015          | Vital Registration     | VR/SRS/DSP |
| Arizona       | 1959-2015          | Vital Registration     | VR/SRS/DSP |
| Arkansas      | 1959-2015          | Vital Registration     | VR/SRS/DSP |



**Appendix Table 5. Under-5 mortality reference sources by source date and location, 1950-2017**

| Location             | Year range of data | Reference source   | Data type  |
|----------------------|--------------------|--------------------|------------|
| California           | 1959-2015          | Vital Registration | VR/SRS/DSP |
| Colorado             | 1959-2015          | Vital Registration | VR/SRS/DSP |
| Connecticut          | 1959-2015          | Vital Registration | VR/SRS/DSP |
| Delaware             | 1959-2015          | Vital Registration | VR/SRS/DSP |
| District of Columbia | 1959-2015          | Vital Registration | VR/SRS/DSP |
| Florida              | 1959-2015          | Vital Registration | VR/SRS/DSP |
| Georgia              | 1959-2015          | Vital Registration | VR/SRS/DSP |
| Hawaii               | 1959-2015          | Vital Registration | VR/SRS/DSP |
| Idaho                | 1959-2015          | Vital Registration | VR/SRS/DSP |
| Illinois             | 1959-2015          | Vital Registration | VR/SRS/DSP |
| Indiana              | 1959-2015          | Vital Registration | VR/SRS/DSP |
| Iowa                 | 1959-2015          | Vital Registration | VR/SRS/DSP |
| Kansas               | 1959-2015          | Vital Registration | VR/SRS/DSP |
| Kentucky             | 1959-2015          | Vital Registration | VR/SRS/DSP |
| Louisiana            | 1959-2015          | Vital Registration | VR/SRS/DSP |
| Maine                | 1959-2015          | Vital Registration | VR/SRS/DSP |
| Maryland             | 1959-2015          | Vital Registration | VR/SRS/DSP |
| Massachusetts        | 1959-2015          | Vital Registration | VR/SRS/DSP |
| Michigan             | 1959-2015          | Vital Registration | VR/SRS/DSP |
| Minnesota            | 1959-2015          | Vital Registration | VR/SRS/DSP |
| Mississippi          | 1959-2015          | Vital Registration | VR/SRS/DSP |
| Missouri             | 1959-2015          | Vital Registration | VR/SRS/DSP |
| Montana              | 1959-2015          | Vital Registration | VR/SRS/DSP |
| Nebraska             | 1959-2015          | Vital Registration | VR/SRS/DSP |
| Nevada               | 1959-2015          | Vital Registration | VR/SRS/DSP |
| New Hampshire        | 1959-2015          | Vital Registration | VR/SRS/DSP |
| New Jersey           | 1959-2015          | Vital Registration | VR/SRS/DSP |
| New Mexico           | 1959-2015          | Vital Registration | VR/SRS/DSP |
| New York             | 1959-2015          | Vital Registration | VR/SRS/DSP |
| North Carolina       | 1959-2015          | Vital Registration | VR/SRS/DSP |
| North Dakota         | 1959-2015          | Vital Registration | VR/SRS/DSP |
| Ohio                 | 1959-2015          | Vital Registration | VR/SRS/DSP |
| Oklahoma             | 1959-2015          | Vital Registration | VR/SRS/DSP |
| Oregon               | 1959-2015          | Vital Registration | VR/SRS/DSP |
| Pennsylvania         | 1959-2015          | Vital Registration | VR/SRS/DSP |
| Rhode Island         | 1959-2015          | Vital Registration | VR/SRS/DSP |
| South Carolina       | 1959-2015          | Vital Registration | VR/SRS/DSP |
| South Dakota         | 1959-2015          | Vital Registration | VR/SRS/DSP |
| Tennessee            | 1959-2015          | Vital Registration | VR/SRS/DSP |
| Texas                | 1959-2015          | Vital Registration | VR/SRS/DSP |
| Utah                 | 1959-2015          | Vital Registration | VR/SRS/DSP |
| Vermont              | 1959-2015          | Vital Registration | VR/SRS/DSP |
| Virginia             | 1959-2015          | Vital Registration | VR/SRS/DSP |
| Washington           | 1959-2015          | Vital Registration | VR/SRS/DSP |
| West Virginia        | 1959-2015          | Vital Registration | VR/SRS/DSP |
| Wisconsin            | 1959-2015          | Vital Registration | VR/SRS/DSP |
| Wyoming              | 1959-2015          | Vital Registration | VR/SRS/DSP |
| Argentina            | 1950-1956          | Vital Registration | VR/SRS/DSP |

**Appendix Table 5. Under-5 mortality reference sources by source date and location, 1950-2017**

| Location   | Year range of data | Reference source   | Data type  |
|------------|--------------------|--------------------|------------|
| Argentina  | 1950-1956          | Census             | SBH        |
| Argentina  | 1958-1970          | Vital Registration | VR/SRS/DSP |
| Argentina  | 1958-1990          | Census             | SBH        |
| Argentina  | 1976-2015          | Vital Registration | VR/SRS/DSP |
| Chile      | 1950-2001          | Census             | SBH        |
| Chile      | 1950-2015          | Vital Registration | VR/SRS/DSP |
| Uruguay    | 1950-2009          | Vital Registration | VR/SRS/DSP |
| Uruguay    | 1950-2011          | Census             | SBH        |
| Uruguay    | 1988-2012          | Other survey       | SBH        |
| Uruguay    | 2012-2015          | Vital Registration | VR/SRS/DSP |
| Andorra    | 1992-1992          | Vital Registration | VR/SRS/DSP |
| Andorra    | 1994-1994          | Vital Registration | VR/SRS/DSP |
| Andorra    | 2002-2005          | Vital Registration | VR/SRS/DSP |
| Andorra    | 2007-2010          | Vital Registration | VR/SRS/DSP |
| Andorra    | 2012-2012          | Vital Registration | VR/SRS/DSP |
| Andorra    | 2015-2015          | Vital Registration | VR/SRS/DSP |
| Austria    | 1950-2016          | Vital Registration | VR/SRS/DSP |
| Belgium    | 1950-1950          | Census             | SBH        |
| Belgium    | 1950-2016          | Vital Registration | VR/SRS/DSP |
| Belgium    | 1952-1953          | Census             | SBH        |
| Belgium    | 1955-1955          | Census             | SBH        |
| Belgium    | 1957-1958          | Census             | SBH        |
| Belgium    | 1961-1961          | Census             | SBH        |
| Belgium    | 1964-1964          | Census             | SBH        |
| Belgium    | 1967-1967          | Census             | SBH        |
| Cyprus     | 1951-1951          | Census             | SBH        |
| Cyprus     | 1954-1957          | Census             | SBH        |
| Cyprus     | 1961-1961          | Census             | SBH        |
| Cyprus     | 1964-1964          | Census             | SBH        |
| Cyprus     | 1967-1967          | Census             | SBH        |
| Cyprus     | 1969-1969          | Census             | SBH        |
| Cyprus     | 1971-1971          | Census             | SBH        |
| Cyprus     | 1974-2016          | Vital Registration | VR/SRS/DSP |
| Cyprus     | 1975-1975          | Census             | SBH        |
| Cyprus     | 1979-1979          | Census             | SBH        |
| Cyprus     | 1983-1983          | Census             | SBH        |
| Cyprus     | 1986-1986          | Census             | SBH        |
| Cyprus     | 1989-1989          | Census             | SBH        |
| Denmark    | 1950-2016          | Vital Registration | VR/SRS/DSP |
| Finland    | 1950-2016          | Vital Registration | VR/SRS/DSP |
| France     | 1950-2016          | Vital Registration | VR/SRS/DSP |
| Germany    | 1956-2015          | Vital Registration | VR/SRS/DSP |
| Greece     | 1951-2016          | Vital Registration | VR/SRS/DSP |
| Iceland    | 1950-2017          | Vital Registration | VR/SRS/DSP |
| Ireland    | 1950-2016          | Vital Registration | VR/SRS/DSP |
| Israel     | 1950-2016          | Vital Registration | VR/SRS/DSP |
| Italy      | 1950-2016          | Vital Registration | VR/SRS/DSP |
| Luxembourg | 1950-2015          | Vital Registration | VR/SRS/DSP |

**Appendix Table 5. Under-5 mortality reference sources by source date and location, 1950-2017**

| Location                | Year range of data | Reference source       | Data type  |
|-------------------------|--------------------|------------------------|------------|
| Malta                   | 1950-2016          | Vital Registration     | VR/SRS/DSP |
| Netherlands             | 1950-2016          | Vital Registration     | VR/SRS/DSP |
| Norway                  | 1950-2016          | Vital Registration     | VR/SRS/DSP |
| Portugal                | 1950-1974          | Vital Registration     | VR/SRS/DSP |
| Portugal                | 1956-1974          | World Fertility Survey | CBH        |
| Portugal                | 1959-1974          | World Fertility Survey | SBH        |
| Portugal                | 1977-1977          | World Fertility Survey | SBH        |
| Portugal                | 1977-1979          | World Fertility Survey | CBH        |
| Portugal                | 1977-2004          | Vital Registration     | VR/SRS/DSP |
| Portugal                | 2006-2016          | Vital Registration     | VR/SRS/DSP |
| Spain                   | 1950-2016          | Vital Registration     | VR/SRS/DSP |
| Sweden                  | 1950-2016          | Vital Registration     | VR/SRS/DSP |
| Stockholm               | 1980-1986          | Vital Registration     | VR/SRS/DSP |
| Stockholm               | 1990-2010          | Vital Registration     | VR/SRS/DSP |
| Stockholm               | 2012-2016          | Vital Registration     | VR/SRS/DSP |
| Sweden except Stockholm | 1980-1986          | Vital Registration     | VR/SRS/DSP |
| Sweden except Stockholm | 1990-2010          | Vital Registration     | VR/SRS/DSP |
| Sweden except Stockholm | 2012-2016          | Vital Registration     | VR/SRS/DSP |
| Switzerland             | 1950-2016          | Vital Registration     | VR/SRS/DSP |
| Switzerland             | 1951-1951          | Census                 | SBH        |
| Switzerland             | 1954-1954          | Census                 | SBH        |
| Switzerland             | 1957-1957          | Census                 | SBH        |
| United Kingdom          | 1950-1999          | Vital Registration     | VR/SRS/DSP |
| United Kingdom          | 2001-2016          | Vital Registration     | VR/SRS/DSP |
| England                 | 1981-2016          | Vital Registration     | VR/SRS/DSP |
| East Midlands           | 1981-2016          | Vital Registration     | VR/SRS/DSP |
| Derby                   | 1981-2016          | Vital Registration     | VR/SRS/DSP |
| Derbyshire              | 1981-2016          | Vital Registration     | VR/SRS/DSP |
| Leicester               | 1981-2016          | Vital Registration     | VR/SRS/DSP |
| Leicestershire          | 1981-2016          | Vital Registration     | VR/SRS/DSP |
| Lincolnshire            | 1981-2016          | Vital Registration     | VR/SRS/DSP |
| Northamptonshire        | 1981-2016          | Vital Registration     | VR/SRS/DSP |
| Nottingham              | 1981-2016          | Vital Registration     | VR/SRS/DSP |
| Nottinghamshire         | 1981-2016          | Vital Registration     | VR/SRS/DSP |
| Rutland                 | 1981-2016          | Vital Registration     | VR/SRS/DSP |
| East of England         | 1981-2016          | Vital Registration     | VR/SRS/DSP |
| Bedford                 | 1981-2016          | Vital Registration     | VR/SRS/DSP |
| Cambridgeshire          | 1981-2016          | Vital Registration     | VR/SRS/DSP |
| Central Bedfordshire    | 1981-2016          | Vital Registration     | VR/SRS/DSP |
| Essex                   | 1981-2016          | Vital Registration     | VR/SRS/DSP |
| Hertfordshire           | 1981-2016          | Vital Registration     | VR/SRS/DSP |
| Luton                   | 1981-2016          | Vital Registration     | VR/SRS/DSP |
| Norfolk                 | 1981-2016          | Vital Registration     | VR/SRS/DSP |
| Peterborough            | 1981-2016          | Vital Registration     | VR/SRS/DSP |
| Southend-on-Sea         | 1981-2016          | Vital Registration     | VR/SRS/DSP |
| Suffolk                 | 1981-2016          | Vital Registration     | VR/SRS/DSP |
| Thurrock                | 1981-2016          | Vital Registration     | VR/SRS/DSP |
| Greater London          | 1981-2016          | Vital Registration     | VR/SRS/DSP |

**Appendix Table 5. Under-5 mortality reference sources by source date and location, 1950-2017**

| Location               | Year range of data | Reference source   | Data type  |
|------------------------|--------------------|--------------------|------------|
| Barking and Dagenham   | 1981-2016          | Vital Registration | VR/SRS/DSP |
| Barnet                 | 1981-2016          | Vital Registration | VR/SRS/DSP |
| Bexley                 | 1981-2016          | Vital Registration | VR/SRS/DSP |
| Brent                  | 1981-2016          | Vital Registration | VR/SRS/DSP |
| Bromley                | 1981-2016          | Vital Registration | VR/SRS/DSP |
| Camden                 | 1981-2016          | Vital Registration | VR/SRS/DSP |
| Croydon                | 1981-2016          | Vital Registration | VR/SRS/DSP |
| Ealing                 | 1981-2016          | Vital Registration | VR/SRS/DSP |
| Enfield                | 1981-2016          | Vital Registration | VR/SRS/DSP |
| Greenwich              | 1981-2016          | Vital Registration | VR/SRS/DSP |
| Hackney                | 1981-2016          | Vital Registration | VR/SRS/DSP |
| Hammersmith and Fulham | 1981-2016          | Vital Registration | VR/SRS/DSP |
| Haringey               | 1981-2016          | Vital Registration | VR/SRS/DSP |
| Harrow                 | 1981-2016          | Vital Registration | VR/SRS/DSP |
| Havering               | 1981-2016          | Vital Registration | VR/SRS/DSP |
| Hillingdon             | 1981-2016          | Vital Registration | VR/SRS/DSP |
| Hounslow               | 1981-2016          | Vital Registration | VR/SRS/DSP |
| Islington              | 1981-2016          | Vital Registration | VR/SRS/DSP |
| Kensington and Chelsea | 1981-2016          | Vital Registration | VR/SRS/DSP |
| Kingston upon Thames   | 1981-2016          | Vital Registration | VR/SRS/DSP |
| Lambeth                | 1981-2016          | Vital Registration | VR/SRS/DSP |
| Lewisham               | 1981-2016          | Vital Registration | VR/SRS/DSP |
| Merton                 | 1981-2016          | Vital Registration | VR/SRS/DSP |
| Newham                 | 1981-2016          | Vital Registration | VR/SRS/DSP |
| Redbridge              | 1981-2016          | Vital Registration | VR/SRS/DSP |
| Richmond upon Thames   | 1981-2016          | Vital Registration | VR/SRS/DSP |
| Southwark              | 1981-2016          | Vital Registration | VR/SRS/DSP |
| Sutton                 | 1981-2016          | Vital Registration | VR/SRS/DSP |
| Tower Hamlets          | 1981-2016          | Vital Registration | VR/SRS/DSP |
| Waltham Forest         | 1981-2016          | Vital Registration | VR/SRS/DSP |
| Wandsworth             | 1981-2016          | Vital Registration | VR/SRS/DSP |
| Westminster            | 1981-2016          | Vital Registration | VR/SRS/DSP |
| North East England     | 1981-2016          | Vital Registration | VR/SRS/DSP |
| County Durham          | 1981-2016          | Vital Registration | VR/SRS/DSP |
| Darlington             | 1981-2016          | Vital Registration | VR/SRS/DSP |
| Gateshead              | 1981-2016          | Vital Registration | VR/SRS/DSP |
| Hartlepool             | 1981-2016          | Vital Registration | VR/SRS/DSP |
| Middlesbrough          | 1981-2016          | Vital Registration | VR/SRS/DSP |
| Newcastle upon Tyne    | 1981-2016          | Vital Registration | VR/SRS/DSP |
| North Tyneside         | 1981-2016          | Vital Registration | VR/SRS/DSP |
| Northumberland         | 1981-2016          | Vital Registration | VR/SRS/DSP |
| Redcar and Cleveland   | 1981-2016          | Vital Registration | VR/SRS/DSP |
| South Tyneside         | 1981-2016          | Vital Registration | VR/SRS/DSP |
| Stockton-on-Tees       | 1981-2016          | Vital Registration | VR/SRS/DSP |
| Sunderland             | 1981-2016          | Vital Registration | VR/SRS/DSP |
| North West England     | 1981-2016          | Vital Registration | VR/SRS/DSP |
| Blackburn with Darwen  | 1981-2016          | Vital Registration | VR/SRS/DSP |
| Blackpool              | 1981-2016          | Vital Registration | VR/SRS/DSP |

**Appendix Table 5. Under-5 mortality reference sources by source date and location, 1950-2017**

| Location                     | Year range of data | Reference source   | Data type  |
|------------------------------|--------------------|--------------------|------------|
| Bolton                       | 1981-2016          | Vital Registration | VR/SRS/DSP |
| Bury                         | 1981-2016          | Vital Registration | VR/SRS/DSP |
| Cheshire East                | 1981-2016          | Vital Registration | VR/SRS/DSP |
| Cheshire West and Chester    | 1981-2016          | Vital Registration | VR/SRS/DSP |
| Cumbria                      | 1981-2016          | Vital Registration | VR/SRS/DSP |
| Halton                       | 1981-2016          | Vital Registration | VR/SRS/DSP |
| Knowsley                     | 1981-2016          | Vital Registration | VR/SRS/DSP |
| Lancashire                   | 1981-2016          | Vital Registration | VR/SRS/DSP |
| Liverpool                    | 1981-2016          | Vital Registration | VR/SRS/DSP |
| Manchester                   | 1981-2016          | Vital Registration | VR/SRS/DSP |
| Oldham                       | 1981-2016          | Vital Registration | VR/SRS/DSP |
| Rochdale                     | 1981-2016          | Vital Registration | VR/SRS/DSP |
| Salford                      | 1981-2016          | Vital Registration | VR/SRS/DSP |
| Sefton                       | 1981-2016          | Vital Registration | VR/SRS/DSP |
| St Helens                    | 1981-2016          | Vital Registration | VR/SRS/DSP |
| Stockport                    | 1981-2016          | Vital Registration | VR/SRS/DSP |
| Tameside                     | 1981-2016          | Vital Registration | VR/SRS/DSP |
| Trafford                     | 1981-2016          | Vital Registration | VR/SRS/DSP |
| Warrington                   | 1981-2016          | Vital Registration | VR/SRS/DSP |
| Wigan                        | 1981-2016          | Vital Registration | VR/SRS/DSP |
| Wirral                       | 1981-2016          | Vital Registration | VR/SRS/DSP |
| South East England           | 1981-2016          | Vital Registration | VR/SRS/DSP |
| Bracknell Forest             | 1981-2016          | Vital Registration | VR/SRS/DSP |
| Brighton and Hove            | 1981-2016          | Vital Registration | VR/SRS/DSP |
| Buckinghamshire              | 1981-2016          | Vital Registration | VR/SRS/DSP |
| East Sussex                  | 1981-2016          | Vital Registration | VR/SRS/DSP |
| Hampshire                    | 1981-2016          | Vital Registration | VR/SRS/DSP |
| Isle of Wight                | 1981-2016          | Vital Registration | VR/SRS/DSP |
| Kent                         | 1981-2016          | Vital Registration | VR/SRS/DSP |
| Medway                       | 1981-2016          | Vital Registration | VR/SRS/DSP |
| Milton Keynes                | 1981-2016          | Vital Registration | VR/SRS/DSP |
| Oxfordshire                  | 1981-2016          | Vital Registration | VR/SRS/DSP |
| Portsmouth                   | 1981-2016          | Vital Registration | VR/SRS/DSP |
| Reading                      | 1981-2016          | Vital Registration | VR/SRS/DSP |
| Slough                       | 1981-2016          | Vital Registration | VR/SRS/DSP |
| Southampton                  | 1981-2016          | Vital Registration | VR/SRS/DSP |
| Surrey                       | 1981-2016          | Vital Registration | VR/SRS/DSP |
| West Berkshire               | 1981-2016          | Vital Registration | VR/SRS/DSP |
| West Sussex                  | 1981-2016          | Vital Registration | VR/SRS/DSP |
| Windsor and Maidenhead       | 1981-2016          | Vital Registration | VR/SRS/DSP |
| Wokingham                    | 1981-2016          | Vital Registration | VR/SRS/DSP |
| South West England           | 1981-2016          | Vital Registration | VR/SRS/DSP |
| Bath and North East Somerset | 1981-2016          | Vital Registration | VR/SRS/DSP |
| Bournemouth                  | 1981-2016          | Vital Registration | VR/SRS/DSP |
| Bristol, City of             | 1981-2016          | Vital Registration | VR/SRS/DSP |
| Cornwall                     | 1981-2016          | Vital Registration | VR/SRS/DSP |
| Devon                        | 1981-2016          | Vital Registration | VR/SRS/DSP |
| Dorset                       | 1981-2016          | Vital Registration | VR/SRS/DSP |

**Appendix Table 5. Under-5 mortality reference sources by source date and location, 1950-2017**

| Location                    | Year range of data | Reference source                       | Data type  |
|-----------------------------|--------------------|----------------------------------------|------------|
| Gloucestershire             | 1981-2016          | Vital Registration                     | VR/SRS/DSP |
| North Somerset              | 1981-2016          | Vital Registration                     | VR/SRS/DSP |
| Plymouth                    | 1981-2016          | Vital Registration                     | VR/SRS/DSP |
| Poole                       | 1981-2016          | Vital Registration                     | VR/SRS/DSP |
| Somerset                    | 1981-2016          | Vital Registration                     | VR/SRS/DSP |
| South Gloucestershire       | 1981-2016          | Vital Registration                     | VR/SRS/DSP |
| Swindon                     | 1981-2016          | Vital Registration                     | VR/SRS/DSP |
| Torbay                      | 1981-2016          | Vital Registration                     | VR/SRS/DSP |
| Wiltshire                   | 1981-2016          | Vital Registration                     | VR/SRS/DSP |
| West Midlands               | 1981-2016          | Vital Registration                     | VR/SRS/DSP |
| Birmingham                  | 1981-2016          | Vital Registration                     | VR/SRS/DSP |
| Coventry                    | 1981-2016          | Vital Registration                     | VR/SRS/DSP |
| Dudley                      | 1981-2016          | Vital Registration                     | VR/SRS/DSP |
| Herefordshire, County of    | 1981-2016          | Vital Registration                     | VR/SRS/DSP |
| Sandwell                    | 1981-2016          | Vital Registration                     | VR/SRS/DSP |
| Shropshire                  | 1981-2016          | Vital Registration                     | VR/SRS/DSP |
| Solihull                    | 1981-2016          | Vital Registration                     | VR/SRS/DSP |
| Staffordshire               | 1981-2016          | Vital Registration                     | VR/SRS/DSP |
| Stoke-on-Trent              | 1981-2016          | Vital Registration                     | VR/SRS/DSP |
| Telford and Wrekin          | 1981-2016          | Vital Registration                     | VR/SRS/DSP |
| Walsall                     | 1981-2016          | Vital Registration                     | VR/SRS/DSP |
| Warwickshire                | 1981-2016          | Vital Registration                     | VR/SRS/DSP |
| Wolverhampton               | 1981-2016          | Vital Registration                     | VR/SRS/DSP |
| Worcestershire              | 1981-2016          | Vital Registration                     | VR/SRS/DSP |
| Yorkshire and the Humber    | 1981-2016          | Vital Registration                     | VR/SRS/DSP |
| Barnsley                    | 1981-2016          | Vital Registration                     | VR/SRS/DSP |
| Bradford                    | 1981-2016          | Vital Registration                     | VR/SRS/DSP |
| Calderdale                  | 1981-2016          | Vital Registration                     | VR/SRS/DSP |
| Doncaster                   | 1981-2016          | Vital Registration                     | VR/SRS/DSP |
| East Riding of Yorkshire    | 1981-2016          | Vital Registration                     | VR/SRS/DSP |
| Kingston upon Hull, City of | 1981-2016          | Vital Registration                     | VR/SRS/DSP |
| Kirklees                    | 1981-2016          | Vital Registration                     | VR/SRS/DSP |
| Leeds                       | 1981-2016          | Vital Registration                     | VR/SRS/DSP |
| North East Lincolnshire     | 1981-2016          | Vital Registration                     | VR/SRS/DSP |
| North Lincolnshire          | 1981-2016          | Vital Registration                     | VR/SRS/DSP |
| North Yorkshire             | 1981-2016          | Vital Registration                     | VR/SRS/DSP |
| Rotherham                   | 1981-2016          | Vital Registration                     | VR/SRS/DSP |
| Sheffield                   | 1981-2016          | Vital Registration                     | VR/SRS/DSP |
| Wakefield                   | 1981-2016          | Vital Registration                     | VR/SRS/DSP |
| York                        | 1981-2016          | Vital Registration                     | VR/SRS/DSP |
| Northern Ireland            | 1950-2016          | Vital Registration                     | VR/SRS/DSP |
| Scotland                    | 1950-2016          | Vital Registration                     | VR/SRS/DSP |
| Wales                       | 1981-2016          | Vital Registration                     | VR/SRS/DSP |
| Bolivia                     | 1951-1958          | Vital Registration                     | VR/SRS/DSP |
| Bolivia                     | 1951-2000          | Census                                 | SBH        |
| Bolivia                     | 1961-1961          | Other survey                           | SBH        |
| Bolivia                     | 1961-2007          | Standard demographic and health survey | CBH        |
| Bolivia                     | 1964-2016          | Standard demographic and health survey | SBH        |

**Appendix Table 5. Under-5 mortality reference sources by source date and location, 1950-2017**

| Location            | Year range of data | Reference source                       | Data type  |
|---------------------|--------------------|----------------------------------------|------------|
| Bolivia             | 1965-1965          | Other survey                           | SBH        |
| Bolivia             | 1965-1966          | Vital Registration                     | VR/SRS/DSP |
| Bolivia             | 1968-1968          | Other survey                           | SBH        |
| Bolivia             | 1971-1971          | Other survey                           | SBH        |
| Bolivia             | 1974-1974          | Other survey                           | SBH        |
| Bolivia             | 1975-1999          | Other survey                           | SBH        |
| Bolivia             | 1976-1977          | Vital Registration                     | VR/SRS/DSP |
| Bolivia             | 1976-2000          | Multiple Indicator Cluster Survey      | SBH        |
| Ecuador             | 1950-2010          | Census                                 | SBH        |
| Ecuador             | 1954-1979          | World Fertility Survey                 | CBH        |
| Ecuador             | 1954-2016          | Vital Registration                     | VR/SRS/DSP |
| Ecuador             | 1955-1979          | World Fertility Survey                 | SBH        |
| Ecuador             | 1962-1986          | Standard demographic and health survey | SBH        |
| Ecuador             | 1963-1986          | Standard demographic and health survey | CBH        |
| Ecuador             | 1965-2004          | Reproductive Health Survey             | SBH        |
| Ecuador             | 1967-2004          | Reproductive Health Survey             | CBH        |
| Ecuador             | 1970-1997          | Living Standards Measurement Study     | SBH        |
| Ecuador             | 1974-2012          | Other survey                           | SBH        |
| Ecuador             | 1983-2012          | Other survey                           | CBH        |
| Peru                | 1950-1964          | Vital Registration                     | VR/SRS/DSP |
| Peru                | 1950-1977          | World Fertility Survey                 | CBH        |
| Peru                | 1953-1977          | World Fertility Survey                 | SBH        |
| Peru                | 1954-1954          | Census                                 | SBH        |
| Peru                | 1957-1957          | Census                                 | SBH        |
| Peru                | 1960-1960          | Census                                 | SBH        |
| Peru                | 1961-1993          | Living Standards Measurement Study     | SBH        |
| Peru                | 1961-2014          | Standard demographic and health survey | CBH        |
| Peru                | 1962-1962          | Census                                 | SBH        |
| Peru                | 1962-2014          | Standard demographic and health survey | SBH        |
| Peru                | 1963-1963          | Other survey                           | SBH        |
| Peru                | 1964-1964          | Census                                 | SBH        |
| Peru                | 1966-1966          | Census                                 | SBH        |
| Peru                | 1966-1966          | Other survey                           | SBH        |
| Peru                | 1966-1973          | Vital Registration                     | VR/SRS/DSP |
| Peru                | 1968-2006          | Census                                 | SBH        |
| Peru                | 1969-1969          | Other survey                           | SBH        |
| Peru                | 1972-1972          | Other survey                           | SBH        |
| Peru                | 1975-1975          | Other survey                           | SBH        |
| Peru                | 1975-1992          | Vital Registration                     | VR/SRS/DSP |
| Peru                | 1977-1977          | Other survey                           | SBH        |
| Peru                | 1984-2015          | Other survey                           | CBH        |
| Peru                | 1994-2015          | Vital Registration                     | VR/SRS/DSP |
| Antigua and Barbuda | 1950-1966          | Vital Registration                     | VR/SRS/DSP |
| Antigua and Barbuda | 1969-1978          | Vital Registration                     | VR/SRS/DSP |
| Antigua and Barbuda | 1983-1983          | Vital Registration                     | VR/SRS/DSP |
| Antigua and Barbuda | 1985-2009          | Vital Registration                     | VR/SRS/DSP |
| Antigua and Barbuda | 2012-2015          | Vital Registration                     | VR/SRS/DSP |
| The Bahamas         | 1965-1965          | Vital Registration                     | VR/SRS/DSP |

**Appendix Table 5. Under-5 mortality reference sources by source date and location, 1950-2017**

| Location           | Year range of data | Reference source                       | Data type  |
|--------------------|--------------------|----------------------------------------|------------|
| The Bahamas        | 1967-1969          | Vital Registration                     | VR/SRS/DSP |
| The Bahamas        | 1971-2013          | Vital Registration                     | VR/SRS/DSP |
| Barbados           | 1950-1995          | Vital Registration                     | VR/SRS/DSP |
| Barbados           | 2000-2013          | Vital Registration                     | VR/SRS/DSP |
| Belize             | 1950-2016          | Vital Registration                     | VR/SRS/DSP |
| Belize             | 1966-1991          | Census                                 | SBH        |
| Belize             | 1966-1999          | Reproductive Health Survey             | SBH        |
| Belize             | 1973-1999          | Reproductive Health Survey             | CBH        |
| Belize             | 1981-2011          | Multiple Indicator Cluster Survey      | SBH        |
| Belize             | 1990-2015          | Multiple Indicator Cluster Survey      | CBH        |
| Belize             | 1993-1993          | Census                                 | SBH        |
| Belize             | 1996-1996          | Census                                 | SBH        |
| Bermuda            | 1950-1950          | Census                                 | SBH        |
| Bermuda            | 1950-1960          | Vital Registration                     | VR/SRS/DSP |
| Bermuda            | 1953-1953          | Census                                 | SBH        |
| Bermuda            | 1956-1956          | Census                                 | SBH        |
| Bermuda            | 1964-2015          | Vital Registration                     | VR/SRS/DSP |
| Cuba               | 1959-2015          | Vital Registration                     | VR/SRS/DSP |
| Cuba               | 1961-1961          | Census                                 | SBH        |
| Cuba               | 1964-1964          | Census                                 | SBH        |
| Cuba               | 1968-1968          | Census                                 | SBH        |
| Cuba               | 1971-1971          | Census                                 | SBH        |
| Cuba               | 1974-1974          | Census                                 | SBH        |
| Cuba               | 1977-1977          | Census                                 | SBH        |
| Dominica           | 1950-1963          | Vital Registration                     | VR/SRS/DSP |
| Dominica           | 1966-2015          | Vital Registration                     | VR/SRS/DSP |
| Dominican Republic | 1950-1979          | World Fertility Survey                 | SBH        |
| Dominican Republic | 1950-1992          | Vital Registration                     | VR/SRS/DSP |
| Dominican Republic | 1950-2009          | Census                                 | SBH        |
| Dominican Republic | 1951-1979          | World Fertility Survey                 | CBH        |
| Dominican Republic | 1959-2013          | Standard demographic and health survey | CBH        |
| Dominican Republic | 1962-2013          | Standard demographic and health survey | SBH        |
| Dominican Republic | 1976-2013          | Multiple Indicator Cluster Survey      | SBH        |
| Dominican Republic | 1978-2005          | Other survey                           | CBH        |
| Dominican Republic | 1984-2013          | Multiple Indicator Cluster Survey      | CBH        |
| Dominican Republic | 1992-2013          | Other demographic and health survey    | CBH        |
| Dominican Republic | 1994-2010          | Vital Registration                     | VR/SRS/DSP |
| Grenada            | 1950-1969          | Vital Registration                     | VR/SRS/DSP |
| Grenada            | 1974-1978          | Vital Registration                     | VR/SRS/DSP |
| Grenada            | 1985-1985          | Vital Registration                     | VR/SRS/DSP |
| Grenada            | 1988-2016          | Vital Registration                     | VR/SRS/DSP |
| Guyana             | 1950-1961          | Vital Registration                     | VR/SRS/DSP |
| Guyana             | 1950-1974          | World Fertility Survey                 | SBH        |
| Guyana             | 1950-1975          | World Fertility Survey                 | CBH        |
| Guyana             | 1968-1992          | Living Standards Measurement Study     | SBH        |
| Guyana             | 1969-1971          | Vital Registration                     | VR/SRS/DSP |
| Guyana             | 1974-1974          | Vital Registration                     | VR/SRS/DSP |
| Guyana             | 1976-2013          | Multiple Indicator Cluster Survey      | SBH        |



**Appendix Table 5. Under-5 mortality reference sources by source date and location, 1950-2017**

| Location                         | Year range of data | Reference source                       | Data type  |
|----------------------------------|--------------------|----------------------------------------|------------|
| Guyana                           | 1977-1977          | Vital Registration                     | VR/SRS/DSP |
| Guyana                           | 1979-1979          | Vital Registration                     | VR/SRS/DSP |
| Guyana                           | 1981-2005          | AIDS Indicator Survey                  | SBH        |
| Guyana                           | 1982-2005          | AIDS Indicator Survey                  | CBH        |
| Guyana                           | 1982-2009          | Standard demographic and health survey | CBH        |
| Guyana                           | 1984-1984          | Vital Registration                     | VR/SRS/DSP |
| Guyana                           | 1984-2008          | Standard demographic and health survey | SBH        |
| Guyana                           | 1988-2013          | Vital Registration                     | VR/SRS/DSP |
| Guyana                           | 1988-2013          | Multiple Indicator Cluster Survey      | CBH        |
| Haiti                            | 1953-1977          | World Fertility Survey                 | SBH        |
| Haiti                            | 1956-1977          | World Fertility Survey                 | CBH        |
| Haiti                            | 1957-2002          | Census                                 | SBH        |
| Haiti                            | 1970-2011          | Standard demographic and health survey | SBH        |
| Haiti                            | 1971-2011          | Standard demographic and health survey | CBH        |
| Haiti                            | 1975-1975          | Other survey                           | SBH        |
| Haiti                            | 1978-1978          | Other survey                           | SBH        |
| Haiti                            | 1981-1981          | Other survey                           | SBH        |
| Haiti                            | 1983-1983          | Other survey                           | SBH        |
| Haiti                            | 1985-1985          | Other survey                           | HH         |
| Haiti                            | 1985-1985          | Other survey                           | SBH        |
| Haiti                            | 2004-2004          | Standard demographic and health survey | HH         |
| Haiti                            | 2005-2008          | Other survey                           | CBH        |
| Haiti                            | 2009-2009          | Standard demographic and health survey | HH         |
| Haiti                            | 2014-2014          | Standard demographic and health survey | HH         |
| Jamaica                          | 1950-1965          | Vital Registration                     | VR/SRS/DSP |
| Jamaica                          | 1951-1975          | World Fertility Survey                 | SBH        |
| Jamaica                          | 1952-1975          | World Fertility Survey                 | CBH        |
| Jamaica                          | 1957-2000          | Census                                 | SBH        |
| Jamaica                          | 1967-1971          | Vital Registration                     | VR/SRS/DSP |
| Jamaica                          | 1975-1975          | Vital Registration                     | VR/SRS/DSP |
| Jamaica                          | 1975-2005          | Multiple Indicator Cluster Survey      | SBH        |
| Jamaica                          | 1977-1977          | Vital Registration                     | VR/SRS/DSP |
| Jamaica                          | 1980-1991          | Vital Registration                     | VR/SRS/DSP |
| Jamaica                          | 1985-1985          | Reproductive Health Survey             | HH         |
| Jamaica                          | 1990-1990          | Reproductive Health Survey             | HH         |
| Jamaica                          | 1995-1995          | Reproductive Health Survey             | HH         |
| Jamaica                          | 1999-2006          | Vital Registration                     | VR/SRS/DSP |
| Jamaica                          | 2009-2011          | Vital Registration                     | VR/SRS/DSP |
| Puerto Rico                      | 1950-2016          | Vital Registration                     | VR/SRS/DSP |
| Puerto Rico                      | 1969-1996          | Reproductive Health Survey             | CBH        |
| Puerto Rico                      | 1971-1995          | Reproductive Health Survey             | SBH        |
| Saint Lucia                      | 1950-1961          | Vital Registration                     | VR/SRS/DSP |
| Saint Lucia                      | 1963-1963          | Vital Registration                     | VR/SRS/DSP |
| Saint Lucia                      | 1968-1968          | Vital Registration                     | VR/SRS/DSP |
| Saint Lucia                      | 1972-2006          | Vital Registration                     | VR/SRS/DSP |
| Saint Lucia                      | 2008-2014          | Vital Registration                     | VR/SRS/DSP |
| Saint Vincent and the Grenadines | 1950-1956          | Vital Registration                     | VR/SRS/DSP |
| Saint Vincent and the Grenadines | 1960-1964          | Vital Registration                     | VR/SRS/DSP |

**Appendix Table 5. Under-5 mortality reference sources by source date and location, 1950-2017**

| Location                         | Year range of data | Reference source                       | Data type  |
|----------------------------------|--------------------|----------------------------------------|------------|
| Saint Vincent and the Grenadines | 1970-1972          | Vital Registration                     | VR/SRS/DSP |
| Saint Vincent and the Grenadines | 1974-1974          | Vital Registration                     | VR/SRS/DSP |
| Saint Vincent and the Grenadines | 1977-1980          | Vital Registration                     | VR/SRS/DSP |
| Saint Vincent and the Grenadines | 1982-1988          | Vital Registration                     | VR/SRS/DSP |
| Saint Vincent and the Grenadines | 1990-1990          | Vital Registration                     | VR/SRS/DSP |
| Saint Vincent and the Grenadines | 1992-1992          | Vital Registration                     | VR/SRS/DSP |
| Saint Vincent and the Grenadines | 1995-2015          | Vital Registration                     | VR/SRS/DSP |
| Suriname                         | 1950-1957          | Vital Registration                     | VR/SRS/DSP |
| Suriname                         | 1961-1966          | Vital Registration                     | VR/SRS/DSP |
| Suriname                         | 1971-1973          | Vital Registration                     | VR/SRS/DSP |
| Suriname                         | 1975-1982          | Vital Registration                     | VR/SRS/DSP |
| Suriname                         | 1975-2005          | Multiple Indicator Cluster Survey      | SBH        |
| Suriname                         | 1984-2015          | Vital Registration                     | VR/SRS/DSP |
| Trinidad and Tobago              | 1950-2011          | Vital Registration                     | VR/SRS/DSP |
| Trinidad and Tobago              | 1952-1976          | World Fertility Survey                 | SBH        |
| Trinidad and Tobago              | 1952-1977          | World Fertility Survey                 | CBH        |
| Trinidad and Tobago              | 1962-1987          | Standard demographic and health survey | CBH        |
| Trinidad and Tobago              | 1963-1987          | Standard demographic and health survey | SBH        |
| Trinidad and Tobago              | 1975-2005          | Multiple Indicator Cluster Survey      | SBH        |
| Virgin Islands, U.S.             | 1950-1966          | Vital Registration                     | VR/SRS/DSP |
| Virgin Islands, U.S.             | 1971-1973          | Vital Registration                     | VR/SRS/DSP |
| Virgin Islands, U.S.             | 1980-1987          | Vital Registration                     | VR/SRS/DSP |
| Virgin Islands, U.S.             | 1989-1989          | Vital Registration                     | VR/SRS/DSP |
| Virgin Islands, U.S.             | 1993-2012          | Vital Registration                     | VR/SRS/DSP |
| Colombia                         | 1950-1977          | Vital Registration                     | VR/SRS/DSP |
| Colombia                         | 1950-2004          | Census                                 | SBH        |
| Colombia                         | 1951-1975          | World Fertility Survey                 | SBH        |
| Colombia                         | 1951-1976          | World Fertility Survey                 | CBH        |
| Colombia                         | 1961-2015          | Standard demographic and health survey | CBH        |
| Colombia                         | 1962-2015          | Standard demographic and health survey | SBH        |
| Colombia                         | 1979-1980          | Vital Registration                     | VR/SRS/DSP |
| Colombia                         | 1982-2015          | Vital Registration                     | VR/SRS/DSP |
| Colombia                         | 1984-2008          | Other survey                           | SBH        |
| Costa Rica                       | 1950-1950          | Vital Registration                     | VR/SRS/DSP |
| Costa Rica                       | 1950-1999          | Census                                 | SBH        |
| Costa Rica                       | 1951-1976          | World Fertility Survey                 | CBH        |
| Costa Rica                       | 1952-1976          | World Fertility Survey                 | SBH        |
| Costa Rica                       | 1952-2014          | Vital Registration                     | VR/SRS/DSP |
| Costa Rica                       | 1956-1980          | Other survey                           | SBH        |
| Costa Rica                       | 1961-1992          | Reproductive Health Survey             | SBH        |
| Costa Rica                       | 1969-1992          | Reproductive Health Survey             | CBH        |
| El Salvador                      | 1950-2014          | Vital Registration                     | VR/SRS/DSP |
| El Salvador                      | 1953-1953          | Census                                 | SBH        |
| El Salvador                      | 1957-1957          | Census                                 | SBH        |
| El Salvador                      | 1960-1960          | Census                                 | SBH        |
| El Salvador                      | 1960-1984          | Standard demographic and health survey | SBH        |
| El Salvador                      | 1962-1962          | Census                                 | SBH        |
| El Salvador                      | 1963-2007          | Reproductive Health Survey             | SBH        |

**Appendix Table 5. Under-5 mortality reference sources by source date and location, 1950-2017**

| Location    | Year range of data | Reference source                       | Data type  |
|-------------|--------------------|----------------------------------------|------------|
| El Salvador | 1965-1965          | Census                                 | SBH        |
| El Salvador | 1967-2006          | Census                                 | SBH        |
| El Salvador | 1971-2008          | Reproductive Health Survey             | CBH        |
| El Salvador | 1983-1984          | Standard demographic and health survey | CBH        |
| El Salvador | 1984-2013          | Multiple Indicator Cluster Survey      | CBH        |
| El Salvador | 1989-2013          | Multiple Indicator Cluster Survey      | SBH        |
| Guatemala   | 1950-1972          | Vital Registration                     | VR/SRS/DSP |
| Guatemala   | 1954-2008          | Reproductive Health Survey             | SBH        |
| Guatemala   | 1963-1963          | Census                                 | SBH        |
| Guatemala   | 1963-2014          | Standard demographic and health survey | SBH        |
| Guatemala   | 1966-1966          | Census                                 | SBH        |
| Guatemala   | 1966-2014          | Standard demographic and health survey | CBH        |
| Guatemala   | 1969-1969          | Census                                 | SBH        |
| Guatemala   | 1972-1972          | Census                                 | SBH        |
| Guatemala   | 1974-1981          | Vital Registration                     | VR/SRS/DSP |
| Guatemala   | 1974-1998          | Other demographic and health survey    | SBH        |
| Guatemala   | 1975-1975          | Census                                 | SBH        |
| Guatemala   | 1975-1999          | Living Standards Measurement Study     | SBH        |
| Guatemala   | 1975-2008          | Reproductive Health Survey             | CBH        |
| Guatemala   | 1977-1977          | Census                                 | SBH        |
| Guatemala   | 1983-2015          | Vital Registration                     | VR/SRS/DSP |
| Honduras    | 1950-1983          | Vital Registration                     | VR/SRS/DSP |
| Honduras    | 1954-1954          | Other survey                           | SBH        |
| Honduras    | 1957-1957          | Other survey                           | SBH        |
| Honduras    | 1960-1960          | Other survey                           | SBH        |
| Honduras    | 1963-1963          | Other survey                           | SBH        |
| Honduras    | 1965-1967          | Other survey                           | SBH        |
| Honduras    | 1967-2000          | Reproductive Health Survey             | SBH        |
| Honduras    | 1969-1970          | Other survey                           | SBH        |
| Honduras    | 1970-2001          | Reproductive Health Survey             | CBH        |
| Honduras    | 1972-1972          | Reproductive Health Survey             | HH         |
| Honduras    | 1972-1975          | Other survey                           | SBH        |
| Honduras    | 1976-2011          | Standard demographic and health survey | CBH        |
| Honduras    | 1977-1977          | Reproductive Health Survey             | HH         |
| Honduras    | 1977-1977          | Other survey                           | SBH        |
| Honduras    | 1979-1979          | Other survey                           | SBH        |
| Honduras    | 1980-1980          | Reproductive Health Survey             | HH         |
| Honduras    | 1980-2004          | Other survey                           | SBH        |
| Honduras    | 1981-2011          | Standard demographic and health survey | SBH        |
| Honduras    | 1982-1982          | Census                                 | SBH        |
| Honduras    | 1985-1985          | Census                                 | SBH        |
| Honduras    | 1987-1990          | Vital Registration                     | VR/SRS/DSP |
| Honduras    | 1989-1989          | Census                                 | SBH        |
| Honduras    | 1991-1991          | Census                                 | SBH        |
| Honduras    | 1994-1994          | Census                                 | SBH        |
| Honduras    | 1997-1997          | Census                                 | SBH        |
| Honduras    | 2008-2013          | Vital Registration                     | VR/SRS/DSP |
| Mexico      | 1950-1976          | World Fertility Survey                 | CBH        |

**Appendix Table 5. Under-5 mortality reference sources by source date and location, 1950-2017**

| Location            | Year range of data | Reference source                       | Data type  |
|---------------------|--------------------|----------------------------------------|------------|
| Mexico              | 1950-2016          | Vital Registration                     | VR/SRS/DSP |
| Mexico              | 1952-1976          | World Fertility Survey                 | SBH        |
| Mexico              | 1960-1987          | Standard demographic and health survey | CBH        |
| Mexico              | 1962-1962          | Census                                 | SBH        |
| Mexico              | 1962-1986          | Standard demographic and health survey | SBH        |
| Mexico              | 1964-2014          | Other survey                           | SBH        |
| Mexico              | 1965-2015          | Census                                 | SBH        |
| Mexico              | 1972-1972          | Other survey                           | HH         |
| Mexico              | 1977-1977          | Other survey                           | HH         |
| Mexico              | 1982-1982          | Other survey                           | HH         |
| Mexico              | 1987-1987          | Other survey                           | HH         |
| Mexico              | 1991-2015          | Multiple Indicator Cluster Survey      | SBH        |
| Aguascalientes      | 1962-1962          | Census                                 | SBH        |
| Aguascalientes      | 1964-2014          | Other survey                           | SBH        |
| Aguascalientes      | 1965-2015          | Census                                 | SBH        |
| Aguascalientes      | 1971-1992          | Other survey                           | CBH        |
| Aguascalientes      | 1979-2016          | Vital Registration                     | VR/SRS/DSP |
| Baja California     | 1961-1961          | Census                                 | SBH        |
| Baja California     | 1964-2014          | Other survey                           | SBH        |
| Baja California     | 1965-2015          | Census                                 | SBH        |
| Baja California     | 1973-1992          | Other survey                           | CBH        |
| Baja California     | 1979-2016          | Vital Registration                     | VR/SRS/DSP |
| Baja California Sur | 1961-1961          | Census                                 | SBH        |
| Baja California Sur | 1964-2014          | Other survey                           | SBH        |
| Baja California Sur | 1965-2015          | Census                                 | SBH        |
| Baja California Sur | 1973-1992          | Other survey                           | CBH        |
| Baja California Sur | 1979-2016          | Vital Registration                     | VR/SRS/DSP |
| Campeche            | 1961-1961          | Census                                 | SBH        |
| Campeche            | 1964-1964          | Census                                 | SBH        |
| Campeche            | 1964-2014          | Other survey                           | SBH        |
| Campeche            | 1965-2015          | Census                                 | SBH        |
| Campeche            | 1971-1992          | Other survey                           | CBH        |
| Campeche            | 1979-2016          | Vital Registration                     | VR/SRS/DSP |
| Chiapas             | 1961-1961          | Census                                 | SBH        |
| Chiapas             | 1964-1964          | Census                                 | SBH        |
| Chiapas             | 1964-2014          | Other survey                           | SBH        |
| Chiapas             | 1965-2015          | Census                                 | SBH        |
| Chiapas             | 1971-1992          | Other survey                           | CBH        |
| Chiapas             | 1979-2016          | Vital Registration                     | VR/SRS/DSP |
| Chihuahua           | 1961-1961          | Census                                 | SBH        |
| Chihuahua           | 1964-2014          | Other survey                           | SBH        |
| Chihuahua           | 1965-2015          | Census                                 | SBH        |
| Chihuahua           | 1973-1992          | Other survey                           | CBH        |
| Chihuahua           | 1979-2016          | Vital Registration                     | VR/SRS/DSP |
| Coahuila            | 1961-1961          | Census                                 | SBH        |
| Coahuila            | 1964-2014          | Other survey                           | SBH        |
| Coahuila            | 1965-2015          | Census                                 | SBH        |
| Coahuila            | 1971-1992          | Other survey                           | CBH        |

**Appendix Table 5. Under-5 mortality reference sources by source date and location, 1950-2017**

| Location            | Year range of data | Reference source   | Data type  |
|---------------------|--------------------|--------------------|------------|
| Coahuila            | 1979-2016          | Vital Registration | VR/SRS/DSP |
| Colima              | 1961-1961          | Census             | SBH        |
| Colima              | 1964-2014          | Other survey       | SBH        |
| Colima              | 1965-2015          | Census             | SBH        |
| Colima              | 1973-1992          | Other survey       | CBH        |
| Colima              | 1979-2016          | Vital Registration | VR/SRS/DSP |
| Mexico City         | 1960-1960          | Census             | SBH        |
| Mexico City         | 1964-1964          | Census             | SBH        |
| Mexico City         | 1964-2014          | Other survey       | SBH        |
| Mexico City         | 1965-2015          | Census             | SBH        |
| Mexico City         | 1973-1992          | Other survey       | CBH        |
| Mexico City         | 1979-2015          | Vital Registration | VR/SRS/DSP |
| Durango             | 1962-1962          | Census             | SBH        |
| Durango             | 1964-2014          | Other survey       | SBH        |
| Durango             | 1965-2015          | Census             | SBH        |
| Durango             | 1971-1992          | Other survey       | CBH        |
| Durango             | 1979-2016          | Vital Registration | VR/SRS/DSP |
| Guanajuato          | 1962-1962          | Census             | SBH        |
| Guanajuato          | 1964-2014          | Other survey       | SBH        |
| Guanajuato          | 1965-2015          | Census             | SBH        |
| Guanajuato          | 1971-1992          | Other survey       | CBH        |
| Guanajuato          | 1979-2016          | Vital Registration | VR/SRS/DSP |
| Guerrero            | 1961-1961          | Census             | SBH        |
| Guerrero            | 1964-2014          | Other survey       | SBH        |
| Guerrero            | 1965-2015          | Census             | SBH        |
| Guerrero            | 1973-1992          | Other survey       | CBH        |
| Guerrero            | 1979-2016          | Vital Registration | VR/SRS/DSP |
| Hidalgo             | 1961-1961          | Census             | SBH        |
| Hidalgo             | 1964-2014          | Other survey       | SBH        |
| Hidalgo             | 1965-2014          | Census             | SBH        |
| Hidalgo             | 1971-1992          | Other survey       | CBH        |
| Hidalgo             | 1979-2016          | Vital Registration | VR/SRS/DSP |
| Jalisco             | 1962-1962          | Census             | SBH        |
| Jalisco             | 1964-2014          | Other survey       | SBH        |
| Jalisco             | 1965-2015          | Census             | SBH        |
| Jalisco             | 1971-1992          | Other survey       | CBH        |
| Jalisco             | 1979-2016          | Vital Registration | VR/SRS/DSP |
| México              | 1961-1961          | Census             | SBH        |
| México              | 1964-2014          | Other survey       | SBH        |
| México              | 1965-2015          | Census             | SBH        |
| México              | 1973-1992          | Other survey       | CBH        |
| México              | 1979-2016          | Vital Registration | VR/SRS/DSP |
| Michoacán de Ocampo | 1962-1962          | Census             | SBH        |
| Michoacán de Ocampo | 1964-2014          | Other survey       | SBH        |
| Michoacán de Ocampo | 1965-2015          | Census             | SBH        |
| Michoacán de Ocampo | 1971-1992          | Other survey       | CBH        |
| Michoacán de Ocampo | 1979-2016          | Vital Registration | VR/SRS/DSP |
| Morelos             | 1961-1961          | Census             | SBH        |

**Appendix Table 5. Under-5 mortality reference sources by source date and location, 1950-2017**

| Location        | Year range of data | Reference source   | Data type  |
|-----------------|--------------------|--------------------|------------|
| Morelos         | 1964-1964          | Census             | SBH        |
| Morelos         | 1964-2014          | Other survey       | SBH        |
| Morelos         | 1965-2015          | Census             | SBH        |
| Morelos         | 1973-1992          | Other survey       | CBH        |
| Morelos         | 1979-2016          | Vital Registration | VR/SRS/DSP |
| Nayarit         | 1962-1962          | Census             | SBH        |
| Nayarit         | 1964-2014          | Other survey       | SBH        |
| Nayarit         | 1965-2015          | Census             | SBH        |
| Nayarit         | 1971-1992          | Other survey       | CBH        |
| Nayarit         | 1979-2016          | Vital Registration | VR/SRS/DSP |
| Nuevo León      | 1961-1961          | Census             | SBH        |
| Nuevo León      | 1964-1964          | Census             | SBH        |
| Nuevo León      | 1964-2014          | Other survey       | SBH        |
| Nuevo León      | 1965-2015          | Census             | SBH        |
| Nuevo León      | 1971-1992          | Other survey       | CBH        |
| Nuevo León      | 1979-2016          | Vital Registration | VR/SRS/DSP |
| Oaxaca          | 1960-1960          | Census             | SBH        |
| Oaxaca          | 1964-1964          | Census             | SBH        |
| Oaxaca          | 1964-2014          | Other survey       | SBH        |
| Oaxaca          | 1965-2015          | Census             | SBH        |
| Oaxaca          | 1971-1992          | Other survey       | CBH        |
| Oaxaca          | 1979-2016          | Vital Registration | VR/SRS/DSP |
| Puebla          | 1961-1961          | Census             | SBH        |
| Puebla          | 1964-2014          | Other survey       | SBH        |
| Puebla          | 1965-2015          | Census             | SBH        |
| Puebla          | 1971-1992          | Other survey       | CBH        |
| Puebla          | 1979-2016          | Vital Registration | VR/SRS/DSP |
| Querétaro       | 1962-1962          | Census             | SBH        |
| Querétaro       | 1964-2014          | Other survey       | SBH        |
| Querétaro       | 1965-2015          | Census             | SBH        |
| Querétaro       | 1973-1992          | Other survey       | CBH        |
| Querétaro       | 1979-2016          | Vital Registration | VR/SRS/DSP |
| Quintana Roo    | 1961-1961          | Census             | SBH        |
| Quintana Roo    | 1964-2014          | Other survey       | SBH        |
| Quintana Roo    | 1965-2015          | Census             | SBH        |
| Quintana Roo    | 1973-1992          | Other survey       | CBH        |
| Quintana Roo    | 1979-2016          | Vital Registration | VR/SRS/DSP |
| San Luis Potosí | 1961-1961          | Census             | SBH        |
| San Luis Potosí | 1964-2014          | Other survey       | SBH        |
| San Luis Potosí | 1965-2015          | Census             | SBH        |
| San Luis Potosí | 1971-1992          | Other survey       | CBH        |
| San Luis Potosí | 1979-2016          | Vital Registration | VR/SRS/DSP |
| Sinaloa         | 1962-1962          | Census             | SBH        |
| Sinaloa         | 1964-2014          | Other survey       | SBH        |
| Sinaloa         | 1965-2015          | Census             | SBH        |
| Sinaloa         | 1971-1992          | Other survey       | CBH        |
| Sinaloa         | 1979-2016          | Vital Registration | VR/SRS/DSP |
| Sonora          | 1961-1961          | Census             | SBH        |

**Appendix Table 5. Under-5 mortality reference sources by source date and location, 1950-2017**

| Location                        | Year range of data | Reference source                       | Data type  |
|---------------------------------|--------------------|----------------------------------------|------------|
| Sonora                          | 1964-2014          | Other survey                           | SBH        |
| Sonora                          | 1965-2015          | Census                                 | SBH        |
| Sonora                          | 1973-1992          | Other survey                           | CBH        |
| Sonora                          | 1979-2016          | Vital Registration                     | VR/SRS/DSP |
| Tabasco                         | 1961-1961          | Census                                 | SBH        |
| Tabasco                         | 1964-2014          | Other survey                           | SBH        |
| Tabasco                         | 1965-2015          | Census                                 | SBH        |
| Tabasco                         | 1971-1992          | Other survey                           | CBH        |
| Tabasco                         | 1979-2016          | Vital Registration                     | VR/SRS/DSP |
| Tamaulipas                      | 1961-1961          | Census                                 | SBH        |
| Tamaulipas                      | 1964-1964          | Census                                 | SBH        |
| Tamaulipas                      | 1964-2014          | Other survey                           | SBH        |
| Tamaulipas                      | 1965-2015          | Census                                 | SBH        |
| Tamaulipas                      | 1973-1992          | Other survey                           | CBH        |
| Tamaulipas                      | 1979-2016          | Vital Registration                     | VR/SRS/DSP |
| Tlaxcala                        | 1961-1961          | Census                                 | SBH        |
| Tlaxcala                        | 1964-2014          | Other survey                           | SBH        |
| Tlaxcala                        | 1965-2015          | Census                                 | SBH        |
| Tlaxcala                        | 1971-1992          | Other survey                           | CBH        |
| Tlaxcala                        | 1979-2016          | Vital Registration                     | VR/SRS/DSP |
| Veracruz de Ignacio de la Llave | 1961-1961          | Census                                 | SBH        |
| Veracruz de Ignacio de la Llave | 1964-1964          | Census                                 | SBH        |
| Veracruz de Ignacio de la Llave | 1964-2014          | Other survey                           | SBH        |
| Veracruz de Ignacio de la Llave | 1965-2015          | Census                                 | SBH        |
| Veracruz de Ignacio de la Llave | 1971-1992          | Other survey                           | CBH        |
| Veracruz de Ignacio de la Llave | 1979-2016          | Vital Registration                     | VR/SRS/DSP |
| Yucatán                         | 1960-1960          | Census                                 | SBH        |
| Yucatán                         | 1964-1964          | Census                                 | SBH        |
| Yucatán                         | 1964-2014          | Other survey                           | SBH        |
| Yucatán                         | 1965-2015          | Census                                 | SBH        |
| Yucatán                         | 1971-1992          | Other survey                           | CBH        |
| Yucatán                         | 1979-2016          | Vital Registration                     | VR/SRS/DSP |
| Zacatecas                       | 1962-1962          | Census                                 | SBH        |
| Zacatecas                       | 1964-2014          | Other survey                           | SBH        |
| Zacatecas                       | 1965-2015          | Census                                 | SBH        |
| Zacatecas                       | 1971-1992          | Other survey                           | CBH        |
| Zacatecas                       | 1979-2016          | Vital Registration                     | VR/SRS/DSP |
| Nicaragua                       | 1950-2004          | Census                                 | SBH        |
| Nicaragua                       | 1965-2006          | Reproductive Health Survey             | CBH        |
| Nicaragua                       | 1967-1967          | Other survey                           | SBH        |
| Nicaragua                       | 1968-2001          | Standard demographic and health survey | CBH        |
| Nicaragua                       | 1968-2004          | Living Standards Measurement Study     | SBH        |
| Nicaragua                       | 1968-2006          | Reproductive Health Survey             | SBH        |
| Nicaragua                       | 1970-1970          | Other survey                           | SBH        |
| Nicaragua                       | 1973-1973          | Other survey                           | SBH        |
| Nicaragua                       | 1973-2001          | Standard demographic and health survey | SBH        |
| Nicaragua                       | 1976-1976          | Other survey                           | SBH        |
| Nicaragua                       | 1979-1979          | Other survey                           | SBH        |

**Appendix Table 5. Under-5 mortality reference sources by source date and location, 1950-2017**

| Location  | Year range of data | Reference source                       | Data type  |
|-----------|--------------------|----------------------------------------|------------|
| Nicaragua | 1981-1981          | Other survey                           | SBH        |
| Nicaragua | 1983-2012          | Other survey                           | CBH        |
| Nicaragua | 1987-2011          | Other demographic and health survey    | SBH        |
| Nicaragua | 1988-1994          | Vital Registration                     | VR/SRS/DSP |
| Nicaragua | 1996-2015          | Vital Registration                     | VR/SRS/DSP |
| Panama    | 1950-1950          | Vital Registration                     | VR/SRS/DSP |
| Panama    | 1950-1975          | World Fertility Survey                 | CBH        |
| Panama    | 1950-2009          | Census                                 | SBH        |
| Panama    | 1951-1975          | World Fertility Survey                 | SBH        |
| Panama    | 1952-2016          | Vital Registration                     | VR/SRS/DSP |
| Panama    | 1972-2002          | Living Standards Measurement Study     | SBH        |
| Venezuela | 1950-1967          | Vital Registration                     | VR/SRS/DSP |
| Venezuela | 1952-1976          | World Fertility Survey                 | SBH        |
| Venezuela | 1956-1977          | World Fertility Survey                 | CBH        |
| Venezuela | 1956-2000          | Census                                 | SBH        |
| Venezuela | 1969-1994          | Vital Registration                     | VR/SRS/DSP |
| Venezuela | 1996-2014          | Vital Registration                     | VR/SRS/DSP |
| Venezuela | 1998-1998          | Other survey                           | HH         |
| Brazil    | 1950-2010          | Census                                 | SBH        |
| Brazil    | 1966-1995          | Standard demographic and health survey | CBH        |
| Brazil    | 1967-1995          | Standard demographic and health survey | SBH        |
| Brazil    | 1972-1973          | Other survey                           | SBH        |
| Brazil    | 1974-2016          | Vital Registration                     | VR/SRS/DSP |
| Brazil    | 1975-1979          | Other survey                           | SBH        |
| Brazil    | 1980-2009          | Other survey                           | SBH        |
| Brazil    | 1982-2006          | Other demographic and health survey    | SBH        |
| Acre      | 1950-2010          | Census                                 | SBH        |
| Acre      | 1971-1995          | Standard demographic and health survey | SBH        |
| Acre      | 1979-2016          | Vital Registration                     | VR/SRS/DSP |
| Acre      | 1981-2009          | Other survey                           | SBH        |
| Acre      | 1984-1993          | Standard demographic and health survey | CBH        |
| Alagoas   | 1950-2010          | Census                                 | SBH        |
| Alagoas   | 1962-1995          | Standard demographic and health survey | SBH        |
| Alagoas   | 1973-1973          | Other survey                           | SBH        |
| Alagoas   | 1974-1995          | Standard demographic and health survey | CBH        |
| Alagoas   | 1976-1979          | Other survey                           | SBH        |
| Alagoas   | 1979-2016          | Vital Registration                     | VR/SRS/DSP |
| Alagoas   | 1980-2009          | Other survey                           | SBH        |
| Amapá     | 1950-2010          | Census                                 | SBH        |
| Amapá     | 1971-1995          | Standard demographic and health survey | SBH        |
| Amapá     | 1979-2016          | Vital Registration                     | VR/SRS/DSP |
| Amapá     | 1980-1981          | Standard demographic and health survey | CBH        |
| Amapá     | 1981-2009          | Other survey                           | SBH        |
| Amazonas  | 1950-2010          | Census                                 | SBH        |
| Amazonas  | 1963-1995          | Standard demographic and health survey | SBH        |
| Amazonas  | 1979-2016          | Vital Registration                     | VR/SRS/DSP |
| Amazonas  | 1980-1995          | Standard demographic and health survey | CBH        |
| Amazonas  | 1981-2009          | Other survey                           | SBH        |



**Appendix Table 5. Under-5 mortality reference sources by source date and location, 1950-2017**

| Location           | Year range of data | Reference source                       | Data type  |
|--------------------|--------------------|----------------------------------------|------------|
| Bahia              | 1950-2010          | Census                                 | SBH        |
| Bahia              | 1962-1995          | Standard demographic and health survey | SBH        |
| Bahia              | 1973-2009          | Other survey                           | SBH        |
| Bahia              | 1976-1995          | Standard demographic and health survey | CBH        |
| Bahia              | 1979-2016          | Vital Registration                     | VR/SRS/DSP |
| Ceará              | 1950-2010          | Census                                 | SBH        |
| Ceará              | 1962-1995          | Standard demographic and health survey | SBH        |
| Ceará              | 1973-1974          | Other survey                           | SBH        |
| Ceará              | 1976-1979          | Other survey                           | SBH        |
| Ceará              | 1976-1995          | Standard demographic and health survey | CBH        |
| Ceará              | 1979-2016          | Vital Registration                     | VR/SRS/DSP |
| Ceará              | 1980-2009          | Other survey                           | SBH        |
| Distrito Federal   | 1950-2010          | Census                                 | SBH        |
| Distrito Federal   | 1962-1995          | Standard demographic and health survey | SBH        |
| Distrito Federal   | 1972-2009          | Other survey                           | SBH        |
| Distrito Federal   | 1979-2016          | Vital Registration                     | VR/SRS/DSP |
| Distrito Federal   | 1982-1983          | Standard demographic and health survey | CBH        |
| Distrito Federal   | 1986-1993          | Standard demographic and health survey | CBH        |
| Espírito Santo     | 1950-2010          | Census                                 | SBH        |
| Espírito Santo     | 1962-1995          | Standard demographic and health survey | SBH        |
| Espírito Santo     | 1971-1972          | Other survey                           | SBH        |
| Espírito Santo     | 1975-1979          | Other survey                           | SBH        |
| Espírito Santo     | 1978-1993          | Standard demographic and health survey | CBH        |
| Espírito Santo     | 1979-2016          | Vital Registration                     | VR/SRS/DSP |
| Espírito Santo     | 1980-2009          | Other survey                           | SBH        |
| Goiás              | 1950-2010          | Census                                 | SBH        |
| Goiás              | 1962-1995          | Standard demographic and health survey | SBH        |
| Goiás              | 1972-1973          | Other survey                           | SBH        |
| Goiás              | 1975-1979          | Other survey                           | SBH        |
| Goiás              | 1978-1979          | Standard demographic and health survey | CBH        |
| Goiás              | 1979-2016          | Vital Registration                     | VR/SRS/DSP |
| Goiás              | 1980-2009          | Other survey                           | SBH        |
| Goiás              | 1982-1995          | Standard demographic and health survey | CBH        |
| Maranhão           | 1950-2010          | Census                                 | SBH        |
| Maranhão           | 1962-1995          | Standard demographic and health survey | SBH        |
| Maranhão           | 1973-1973          | Other survey                           | SBH        |
| Maranhão           | 1975-1979          | Other survey                           | SBH        |
| Maranhão           | 1976-1995          | Standard demographic and health survey | CBH        |
| Maranhão           | 1979-2016          | Vital Registration                     | VR/SRS/DSP |
| Maranhão           | 1980-2009          | Other survey                           | SBH        |
| Mato Grosso        | 1950-2010          | Census                                 | SBH        |
| Mato Grosso        | 1962-1995          | Standard demographic and health survey | SBH        |
| Mato Grosso        | 1972-1972          | Other survey                           | SBH        |
| Mato Grosso        | 1974-1979          | Other survey                           | SBH        |
| Mato Grosso        | 1979-2016          | Vital Registration                     | VR/SRS/DSP |
| Mato Grosso        | 1980-1995          | Standard demographic and health survey | CBH        |
| Mato Grosso        | 1980-2009          | Other survey                           | SBH        |
| Mato Grosso do Sul | 1956-2010          | Census                                 | SBH        |

**Appendix Table 5. Under-5 mortality reference sources by source date and location, 1950-2017**

| Location           | Year range of data | Reference source                       | Data type  |
|--------------------|--------------------|----------------------------------------|------------|
| Mato Grosso do Sul | 1959-1995          | Standard demographic and health survey | SBH        |
| Mato Grosso do Sul | 1972-1973          | Other survey                           | SBH        |
| Mato Grosso do Sul | 1975-1979          | Other survey                           | SBH        |
| Mato Grosso do Sul | 1978-1995          | Standard demographic and health survey | CBH        |
| Mato Grosso do Sul | 1979-2016          | Vital Registration                     | VR/SRS/DSP |
| Mato Grosso do Sul | 1980-2009          | Other survey                           | SBH        |
| Minas Gerais       | 1950-2010          | Census                                 | SBH        |
| Minas Gerais       | 1962-1995          | Standard demographic and health survey | SBH        |
| Minas Gerais       | 1972-1973          | Other survey                           | SBH        |
| Minas Gerais       | 1975-1976          | Other survey                           | SBH        |
| Minas Gerais       | 1978-1979          | Other survey                           | SBH        |
| Minas Gerais       | 1979-2016          | Vital Registration                     | VR/SRS/DSP |
| Minas Gerais       | 1980-1995          | Standard demographic and health survey | CBH        |
| Minas Gerais       | 1980-2009          | Other survey                           | SBH        |
| Pará               | 1950-2010          | Census                                 | SBH        |
| Pará               | 1962-1995          | Standard demographic and health survey | SBH        |
| Pará               | 1979-2016          | Vital Registration                     | VR/SRS/DSP |
| Pará               | 1980-1995          | Standard demographic and health survey | CBH        |
| Pará               | 1981-2009          | Other survey                           | SBH        |
| Paraíba            | 1950-2010          | Census                                 | SBH        |
| Paraíba            | 1962-1995          | Standard demographic and health survey | SBH        |
| Paraíba            | 1973-1974          | Other survey                           | SBH        |
| Paraíba            | 1976-1979          | Other survey                           | SBH        |
| Paraíba            | 1976-1995          | Standard demographic and health survey | CBH        |
| Paraíba            | 1980-2009          | Other survey                           | SBH        |
| Paraíba            | 1980-2016          | Vital Registration                     | VR/SRS/DSP |
| Paraná             | 1950-2010          | Census                                 | SBH        |
| Paraná             | 1962-1995          | Standard demographic and health survey | SBH        |
| Paraná             | 1972-1973          | Other survey                           | SBH        |
| Paraná             | 1975-1979          | Other survey                           | SBH        |
| Paraná             | 1979-2016          | Vital Registration                     | VR/SRS/DSP |
| Paraná             | 1980-1987          | Standard demographic and health survey | CBH        |
| Paraná             | 1980-2009          | Other survey                           | SBH        |
| Paraná             | 1990-1995          | Standard demographic and health survey | CBH        |
| Pernambuco         | 1950-2010          | Census                                 | SBH        |
| Pernambuco         | 1962-1995          | Standard demographic and health survey | SBH        |
| Pernambuco         | 1973-1973          | Other survey                           | SBH        |
| Pernambuco         | 1976-1977          | Other survey                           | SBH        |
| Pernambuco         | 1976-1995          | Standard demographic and health survey | CBH        |
| Pernambuco         | 1979-1979          | Other survey                           | SBH        |
| Pernambuco         | 1979-2016          | Vital Registration                     | VR/SRS/DSP |
| Pernambuco         | 1980-2009          | Other survey                           | SBH        |
| Piauí              | 1950-2010          | Census                                 | SBH        |
| Piauí              | 1962-1995          | Standard demographic and health survey | SBH        |
| Piauí              | 1973-1975          | Other survey                           | SBH        |
| Piauí              | 1976-1991          | Standard demographic and health survey | CBH        |
| Piauí              | 1977-1979          | Other survey                           | SBH        |
| Piauí              | 1979-2016          | Vital Registration                     | VR/SRS/DSP |

**Appendix Table 5. Under-5 mortality reference sources by source date and location, 1950-2017**

| Location            | Year range of data | Reference source                       | Data type  |
|---------------------|--------------------|----------------------------------------|------------|
| Piauí               | 1980-2009          | Other survey                           | SBH        |
| Piauí               | 1994-1995          | Standard demographic and health survey | CBH        |
| Rio de Janeiro      | 1950-2010          | Census                                 | SBH        |
| Rio de Janeiro      | 1962-1995          | Standard demographic and health survey | SBH        |
| Rio de Janeiro      | 1971-1972          | Other survey                           | SBH        |
| Rio de Janeiro      | 1974-1979          | Other survey                           | SBH        |
| Rio de Janeiro      | 1978-1995          | Standard demographic and health survey | CBH        |
| Rio de Janeiro      | 1979-2016          | Vital Registration                     | VR/SRS/DSP |
| Rio de Janeiro      | 1980-2009          | Other survey                           | SBH        |
| Rio Grande do Norte | 1950-2010          | Census                                 | SBH        |
| Rio Grande do Norte | 1962-1995          | Standard demographic and health survey | SBH        |
| Rio Grande do Norte | 1972-1972          | Other survey                           | SBH        |
| Rio Grande do Norte | 1974-1974          | Other survey                           | SBH        |
| Rio Grande do Norte | 1976-1979          | Other survey                           | SBH        |
| Rio Grande do Norte | 1976-1995          | Standard demographic and health survey | CBH        |
| Rio Grande do Norte | 1979-2016          | Vital Registration                     | VR/SRS/DSP |
| Rio Grande do Norte | 1980-2009          | Other survey                           | SBH        |
| Rio Grande do Sul   | 1950-2010          | Census                                 | SBH        |
| Rio Grande do Sul   | 1962-1995          | Standard demographic and health survey | SBH        |
| Rio Grande do Sul   | 1971-1972          | Other survey                           | SBH        |
| Rio Grande do Sul   | 1974-1979          | Other survey                           | SBH        |
| Rio Grande do Sul   | 1978-1995          | Standard demographic and health survey | CBH        |
| Rio Grande do Sul   | 1979-2016          | Vital Registration                     | VR/SRS/DSP |
| Rio Grande do Sul   | 1980-2009          | Other survey                           | SBH        |
| Rondônia            | 1950-2010          | Census                                 | SBH        |
| Rondônia            | 1971-1995          | Standard demographic and health survey | SBH        |
| Rondônia            | 1978-1983          | Standard demographic and health survey | CBH        |
| Rondônia            | 1979-2016          | Vital Registration                     | VR/SRS/DSP |
| Rondônia            | 1981-2009          | Other survey                           | SBH        |
| Rondônia            | 1986-1989          | Standard demographic and health survey | CBH        |
| Rondônia            | 1992-1993          | Standard demographic and health survey | CBH        |
| Roraima             | 1950-2010          | Census                                 | SBH        |
| Roraima             | 1971-1995          | Standard demographic and health survey | SBH        |
| Roraima             | 1979-2016          | Vital Registration                     | VR/SRS/DSP |
| Roraima             | 1981-2009          | Other survey                           | SBH        |
| Roraima             | 1986-1987          | Standard demographic and health survey | CBH        |
| Roraima             | 1992-1993          | Standard demographic and health survey | CBH        |
| Santa Catarina      | 1950-2010          | Census                                 | SBH        |
| Santa Catarina      | 1962-1995          | Standard demographic and health survey | SBH        |
| Santa Catarina      | 1972-1973          | Other survey                           | SBH        |
| Santa Catarina      | 1975-1979          | Other survey                           | SBH        |
| Santa Catarina      | 1979-2016          | Vital Registration                     | VR/SRS/DSP |
| Santa Catarina      | 1980-1983          | Standard demographic and health survey | CBH        |
| Santa Catarina      | 1980-2009          | Other survey                           | SBH        |
| Santa Catarina      | 1986-1993          | Standard demographic and health survey | CBH        |
| São Paulo           | 1950-2010          | Census                                 | SBH        |
| São Paulo           | 1962-1995          | Standard demographic and health survey | SBH        |
| São Paulo           | 1971-1972          | Other survey                           | SBH        |

**Appendix Table 5. Under-5 mortality reference sources by source date and location, 1950-2017**

| Location    | Year range of data | Reference source                       | Data type  |
|-------------|--------------------|----------------------------------------|------------|
| São Paulo   | 1974-1979          | Other survey                           | SBH        |
| São Paulo   | 1979-2016          | Vital Registration                     | VR/SRS/DSP |
| São Paulo   | 1980-1995          | Standard demographic and health survey | CBH        |
| São Paulo   | 1980-2009          | Other survey                           | SBH        |
| Sergipe     | 1950-2010          | Census                                 | SBH        |
| Sergipe     | 1962-1995          | Standard demographic and health survey | SBH        |
| Sergipe     | 1973-1974          | Other survey                           | SBH        |
| Sergipe     | 1976-1979          | Other survey                           | SBH        |
| Sergipe     | 1976-1995          | Standard demographic and health survey | CBH        |
| Sergipe     | 1979-2016          | Vital Registration                     | VR/SRS/DSP |
| Sergipe     | 1980-2009          | Other survey                           | SBH        |
| Tocantins   | 1967-2010          | Census                                 | SBH        |
| Tocantins   | 1971-1995          | Standard demographic and health survey | SBH        |
| Tocantins   | 1981-2009          | Other survey                           | SBH        |
| Tocantins   | 1986-1987          | Standard demographic and health survey | CBH        |
| Tocantins   | 1990-1995          | Standard demographic and health survey | CBH        |
| Tocantins   | 1990-2016          | Vital Registration                     | VR/SRS/DSP |
| Paraguay    | 1950-1991          | Vital Registration                     | VR/SRS/DSP |
| Paraguay    | 1950-2001          | Census                                 | SBH        |
| Paraguay    | 1953-1978          | World Fertility Survey                 | CBH        |
| Paraguay    | 1954-1978          | World Fertility Survey                 | SBH        |
| Paraguay    | 1965-1990          | Standard demographic and health survey | CBH        |
| Paraguay    | 1966-1990          | Standard demographic and health survey | SBH        |
| Paraguay    | 1970-2008          | Reproductive Health Survey             | CBH        |
| Paraguay    | 1971-2008          | Reproductive Health Survey             | SBH        |
| Paraguay    | 1972-1999          | Other survey                           | SBH        |
| Paraguay    | 1989-2016          | Multiple Indicator Cluster Survey      | CBH        |
| Paraguay    | 1992-2016          | Multiple Indicator Cluster Survey      | SBH        |
| Paraguay    | 1994-2014          | Vital Registration                     | VR/SRS/DSP |
| Afghanistan | 1982-2006          | Other survey                           | SBH        |
| Afghanistan | 1983-1983          | Multiple Indicator Cluster Survey      | SBH        |
| Afghanistan | 1984-2015          | Standard demographic and health survey | CBH        |
| Afghanistan | 1986-2010          | Multiple Indicator Cluster Survey      | SBH        |
| Afghanistan | 1991-2015          | Standard demographic and health survey | SBH        |
| Afghanistan | 2009-2009          | Other survey                           | SBH        |
| Algeria     | 1950-1956          | Vital Registration                     | VR/SRS/DSP |
| Algeria     | 1961-1992          | Pan Arab Project for Child Development | CBH        |
| Algeria     | 1964-1965          | Vital Registration                     | VR/SRS/DSP |
| Algeria     | 1967-1991          | Pan Arab Project for Child Development | SBH        |
| Algeria     | 1975-2002          | Pan Arab Project for Family Health     | CBH        |
| Algeria     | 1977-2001          | Pan Arab Project for Family Health     | SBH        |
| Algeria     | 1980-1982          | Vital Registration                     | VR/SRS/DSP |
| Algeria     | 1983-2012          | Multiple Indicator Cluster Survey      | CBH        |
| Algeria     | 1985-1986          | Vital Registration                     | VR/SRS/DSP |
| Algeria     | 1988-2012          | Multiple Indicator Cluster Survey      | SBH        |
| Algeria     | 1990-1990          | Vital Registration                     | VR/SRS/DSP |
| Algeria     | 1998-1998          | Vital Registration                     | VR/SRS/DSP |
| Algeria     | 2000-2000          | Vital Registration                     | VR/SRS/DSP |

**Appendix Table 5. Under-5 mortality reference sources by source date and location, 1950-2017**

| Location | Year range of data | Reference source                       | Data type  |
|----------|--------------------|----------------------------------------|------------|
| Algeria  | 2007-2011          | Vital Registration                     | VR/SRS/DSP |
| Algeria  | 2014-2016          | Vital Registration                     | VR/SRS/DSP |
| Bahrain  | 1952-1952          | Census                                 | SBH        |
| Bahrain  | 1956-1956          | Census                                 | SBH        |
| Bahrain  | 1959-1959          | Census                                 | SBH        |
| Bahrain  | 1962-1962          | Census                                 | SBH        |
| Bahrain  | 1965-1965          | Census                                 | SBH        |
| Bahrain  | 1967-1967          | Census                                 | SBH        |
| Bahrain  | 1972-1972          | Pan Arab Project for Child Development | HH         |
| Bahrain  | 1972-1972          | Pan Arab Project for Child Development | SBH        |
| Bahrain  | 1973-1973          | Census                                 | SBH        |
| Bahrain  | 1975-1975          | Census                                 | SBH        |
| Bahrain  | 1975-1975          | Pan Arab Project for Child Development | SBH        |
| Bahrain  | 1977-1977          | Pan Arab Project for Family Health     | HH         |
| Bahrain  | 1977-1977          | Pan Arab Project for Child Development | HH         |
| Bahrain  | 1977-1977          | Pan Arab Project for Child Development | SBH        |
| Bahrain  | 1979-1979          | Census                                 | SBH        |
| Bahrain  | 1980-1980          | Pan Arab Project for Child Development | SBH        |
| Bahrain  | 1980-1982          | Vital Registration                     | VR/SRS/DSP |
| Bahrain  | 1982-1982          | Census                                 | SBH        |
| Bahrain  | 1982-1982          | Pan Arab Project for Family Health     | HH         |
| Bahrain  | 1982-1982          | Pan Arab Project for Child Development | HH         |
| Bahrain  | 1983-1983          | Pan Arab Project for Child Development | SBH        |
| Bahrain  | 1984-1993          | Vital Registration                     | VR/SRS/DSP |
| Bahrain  | 1985-1985          | Census                                 | SBH        |
| Bahrain  | 1985-1985          | Pan Arab Project for Child Development | SBH        |
| Bahrain  | 1987-1987          | Pan Arab Project for Family Health     | HH         |
| Bahrain  | 1987-1987          | Pan Arab Project for Child Development | HH         |
| Bahrain  | 1987-1988          | Census                                 | SBH        |
| Bahrain  | 1992-1992          | Census                                 | SBH        |
| Bahrain  | 1992-1992          | Pan Arab Project for Family Health     | HH         |
| Bahrain  | 1995-1995          | Census                                 | SBH        |
| Bahrain  | 1995-2012          | Vital Registration                     | VR/SRS/DSP |
| Bahrain  | 1998-1998          | Census                                 | SBH        |
| Bahrain  | 2014-2014          | Vital Registration                     | VR/SRS/DSP |
| Egypt    | 1950-1957          | Vital Registration                     | VR/SRS/DSP |
| Egypt    | 1950-1979          | World Fertility Survey                 | CBH        |
| Egypt    | 1955-1979          | World Fertility Survey                 | SBH        |
| Egypt    | 1957-1957          | Census                                 | SBH        |
| Egypt    | 1957-1990          | Pan Arab Project for Child Development | CBH        |
| Egypt    | 1959-1981          | Vital Registration                     | VR/SRS/DSP |
| Egypt    | 1959-2013          | Standard demographic and health survey | CBH        |
| Egypt    | 1960-1960          | Census                                 | SBH        |
| Egypt    | 1964-1964          | Census                                 | SBH        |
| Egypt    | 1964-2013          | Standard demographic and health survey | SBH        |
| Egypt    | 1966-1966          | Other survey                           | SBH        |
| Egypt    | 1966-1990          | Pan Arab Project for Child Development | SBH        |
| Egypt    | 1967-1967          | Census                                 | SBH        |

**Appendix Table 5. Under-5 mortality reference sources by source date and location, 1950-2017**

| Location | Year range of data | Reference source                       | Data type  |
|----------|--------------------|----------------------------------------|------------|
| Egypt    | 1969-1969          | Other survey                           | SBH        |
| Egypt    | 1970-1970          | Census                                 | SBH        |
| Egypt    | 1972-1972          | Census                                 | SBH        |
| Egypt    | 1973-1973          | Other survey                           | SBH        |
| Egypt    | 1975-1975          | Other survey                           | SBH        |
| Egypt    | 1978-1978          | Other survey                           | SBH        |
| Egypt    | 1978-2014          | Other demographic and health survey    | SBH        |
| Egypt    | 1980-1980          | Other survey                           | SBH        |
| Egypt    | 1983-2015          | Vital Registration                     | VR/SRS/DSP |
| Egypt    | 1985-1986          | Standard demographic and health survey | HH         |
| Egypt    | 1986-2013          | Multiple Indicator Cluster Survey      | CBH        |
| Egypt    | 1990-1991          | Standard demographic and health survey | HH         |
| Egypt    | 1995-1996          | Standard demographic and health survey | HH         |
| Iran     | 1967-2000          | Other survey                           | CBH        |
| Iran     | 1974-1974          | Other survey                           | HH         |
| Iran     | 1975-1999          | Other survey                           | SBH        |
| Iran     | 1981-2016          | Census                                 | SBH        |
| Iran     | 1984-1984          | Other survey                           | HH         |
| Iran     | 1994-1994          | Other survey                           | HH         |
| Iran     | 2005-2005          | Standard demographic and health survey | HH         |
| Iran     | 2007-2007          | Standard demographic and health survey | HH         |
| Iran     | 2015-2016          | Vital Registration                     | VR/SRS/DSP |
| Iraq     | 1969-1969          | Census                                 | SBH        |
| Iraq     | 1969-2006          | Other survey                           | CBH        |
| Iraq     | 1972-1996          | Census                                 | SBH        |
| Iraq     | 1973-1973          | Demographic surveillance sites         | DSS        |
| Iraq     | 1976-1976          | Other survey                           | HH         |
| Iraq     | 1976-1977          | Vital Registration                     | VR/SRS/DSP |
| Iraq     | 1976-2010          | Multiple Indicator Cluster Survey      | CBH        |
| Iraq     | 1979-2005          | Other survey                           | SBH        |
| Iraq     | 1981-1981          | Other survey                           | HH         |
| Iraq     | 1981-2010          | Multiple Indicator Cluster Survey      | SBH        |
| Iraq     | 1986-1986          | Other survey                           | HH         |
| Iraq     | 1987-1989          | Vital Registration                     | VR/SRS/DSP |
| Iraq     | 1990-1991          | Other survey                           | HH         |
| Iraq     | 1996-1996          | Other survey                           | HH         |
| Iraq     | 2001-2001          | Other survey                           | HH         |
| Iraq     | 2008-2008          | Vital Registration                     | VR/SRS/DSP |
| Iraq     | 2012-2016          | Vital Registration                     | VR/SRS/DSP |
| Jordan   | 1960-1960          | Census                                 | SBH        |
| Jordan   | 1963-1966          | Standard demographic and health survey | CBH        |
| Jordan   | 1964-1964          | Census                                 | SBH        |
| Jordan   | 1964-1964          | Other survey                           | SBH        |
| Jordan   | 1966-1966          | Standard demographic and health survey | SBH        |
| Jordan   | 1968-1968          | Census                                 | SBH        |
| Jordan   | 1968-1968          | Other survey                           | SBH        |
| Jordan   | 1968-1980          | Vital Registration                     | VR/SRS/DSP |
| Jordan   | 1968-2012          | Standard demographic and health survey | CBH        |

**Appendix Table 5. Under-5 mortality reference sources by source date and location, 1950-2017**

| Location | Year range of data | Reference source                       | Data type  |
|----------|--------------------|----------------------------------------|------------|
| Jordan   | 1968-2012          | Standard demographic and health survey | SBH        |
| Jordan   | 1971-1971          | Census                                 | SBH        |
| Jordan   | 1971-1971          | Other survey                           | SBH        |
| Jordan   | 1973-1973          | Census                                 | SBH        |
| Jordan   | 1973-1978          | Other survey                           | SBH        |
| Jordan   | 1976-1976          | Census                                 | SBH        |
| Jordan   | 1980-1982          | Other survey                           | SBH        |
| Jordan   | 1984-1985          | Other survey                           | SBH        |
| Jordan   | 1985-2009          | Other demographic and health survey    | SBH        |
| Jordan   | 1987-1987          | Other survey                           | SBH        |
| Jordan   | 1990-1990          | Other survey                           | SBH        |
| Jordan   | 1993-1993          | Other survey                           | SBH        |
| Jordan   | 1995-1995          | Other survey                           | SBH        |
| Jordan   | 2004-2006          | Vital Registration                     | VR/SRS/DSP |
| Jordan   | 2008-2013          | Vital Registration                     | VR/SRS/DSP |
| Kuwait   | 1956-1956          | Census                                 | SBH        |
| Kuwait   | 1960-1961          | Census                                 | SBH        |
| Kuwait   | 1962-1989          | Vital Registration                     | VR/SRS/DSP |
| Kuwait   | 1963-1963          | Census                                 | SBH        |
| Kuwait   | 1965-1966          | Census                                 | SBH        |
| Kuwait   | 1966-1966          | Pan Arab Project for Child Development | SBH        |
| Kuwait   | 1968-1969          | Census                                 | SBH        |
| Kuwait   | 1970-1970          | Pan Arab Project for Child Development | SBH        |
| Kuwait   | 1971-1971          | Census                                 | SBH        |
| Kuwait   | 1973-1973          | Pan Arab Project for Child Development | SBH        |
| Kuwait   | 1974-1974          | Census                                 | SBH        |
| Kuwait   | 1976-1976          | Census                                 | SBH        |
| Kuwait   | 1976-1976          | Pan Arab Project for Child Development | SBH        |
| Kuwait   | 1978-1978          | Pan Arab Project for Family Health     | HH         |
| Kuwait   | 1981-1981          | Pan Arab Project for Child Development | SBH        |
| Kuwait   | 1984-1984          | Pan Arab Project for Family Health     | HH         |
| Kuwait   | 1984-1984          | Pan Arab Project for Child Development | SBH        |
| Kuwait   | 1988-1988          | Pan Arab Project for Family Health     | HH         |
| Kuwait   | 1991-2015          | Vital Registration                     | VR/SRS/DSP |
| Kuwait   | 1994-1994          | Pan Arab Project for Family Health     | HH         |
| Lebanon  | 1966-1995          | Pan Arab Project for Child Development | CBH        |
| Lebanon  | 1971-1995          | Pan Arab Project for Child Development | SBH        |
| Lebanon  | 1979-2003          | Pan Arab Project for Family Health     | SBH        |
| Lebanon  | 1979-2004          | Pan Arab Project for Family Health     | CBH        |
| Lebanon  | 1998-1998          | Multiple Indicator Cluster Survey      | SBH        |
| Lebanon  | 2004-2004          | Vital Registration                     | VR/SRS/DSP |
| Lebanon  | 2009-2009          | Multiple Indicator Cluster Survey      | SBH        |
| Lebanon  | 2011-2015          | Vital Registration                     | VR/SRS/DSP |
| Libya    | 1956-1956          | Census                                 | SBH        |
| Libya    | 1959-1959          | Census                                 | SBH        |
| Libya    | 1962-1962          | Census                                 | SBH        |
| Libya    | 1964-1995          | Pan Arab Project for Child Development | CBH        |
| Libya    | 1965-1965          | Census                                 | SBH        |

**Appendix Table 5. Under-5 mortality reference sources by source date and location, 1950-2017**

| Location  | Year range of data | Reference source                       | Data type  |
|-----------|--------------------|----------------------------------------|------------|
| Libya     | 1967-1967          | Census                                 | SBH        |
| Libya     | 1969-1969          | Census                                 | SBH        |
| Libya     | 1970-1994          | Pan Arab Project for Child Development | SBH        |
| Libya     | 1972-1976          | Vital Registration                     | VR/SRS/DSP |
| Libya     | 1981-1981          | Vital Registration                     | VR/SRS/DSP |
| Libya     | 1983-2007          | Pan Arab Project for Family Health     | SBH        |
| Libya     | 1996-1996          | Vital Registration                     | VR/SRS/DSP |
| Libya     | 2000-2000          | Vital Registration                     | VR/SRS/DSP |
| Libya     | 2002-2002          | Vital Registration                     | VR/SRS/DSP |
| Libya     | 2003-2003          | Multiple Indicator Cluster Survey      | SBH        |
| Libya     | 2006-2011          | Vital Registration                     | VR/SRS/DSP |
| Morocco   | 1953-1980          | World Fertility Survey                 | CBH        |
| Morocco   | 1955-1979          | World Fertility Survey                 | SBH        |
| Morocco   | 1957-2003          | Census                                 | SBH        |
| Morocco   | 1958-2003          | Standard demographic and health survey | CBH        |
| Morocco   | 1963-1994          | Other demographic and health survey    | CBH        |
| Morocco   | 1963-2003          | Standard demographic and health survey | SBH        |
| Morocco   | 1970-1994          | Other demographic and health survey    | SBH        |
| Morocco   | 1970-1997          | Pan Arab Project for Child Development | CBH        |
| Morocco   | 1972-1996          | Pan Arab Project for Child Development | SBH        |
| Morocco   | 1989-1991          | Vital Registration                     | VR/SRS/DSP |
| Morocco   | 1993-1993          | Vital Registration                     | VR/SRS/DSP |
| Morocco   | 1995-1997          | Vital Registration                     | VR/SRS/DSP |
| Morocco   | 1999-1999          | Vital Registration                     | VR/SRS/DSP |
| Morocco   | 2001-2001          | Vital Registration                     | VR/SRS/DSP |
| Morocco   | 2007-2007          | Vital Registration                     | VR/SRS/DSP |
| Morocco   | 2011-2011          | Other survey                           | HH         |
| Palestine | 1970-2003          | Other survey                           | CBH        |
| Palestine | 1975-2013          | Multiple Indicator Cluster Survey      | SBH        |
| Palestine | 1977-2013          | Multiple Indicator Cluster Survey      | CBH        |
| Palestine | 1979-1979          | Census                                 | SBH        |
| Palestine | 1980-2004          | Other demographic and health survey    | SBH        |
| Palestine | 1983-1983          | Census                                 | SBH        |
| Palestine | 1986-1986          | Census                                 | SBH        |
| Palestine | 1988-1988          | Census                                 | SBH        |
| Palestine | 1990-1990          | Census                                 | SBH        |
| Palestine | 1992-1992          | Other demographic and health survey    | HH         |
| Palestine | 1992-1993          | Census                                 | SBH        |
| Palestine | 1995-1995          | Census                                 | SBH        |
| Palestine | 1998-1998          | Census                                 | SBH        |
| Palestine | 2001-2001          | Census                                 | SBH        |
| Palestine | 2001-2001          | Other survey                           | HH         |
| Palestine | 2003-2003          | Census                                 | SBH        |
| Palestine | 2004-2004          | Pan Arab Project for Family Health     | HH         |
| Palestine | 2008-2016          | Vital Registration                     | VR/SRS/DSP |
| Oman      | 1960-1960          | Other survey                           | SBH        |
| Oman      | 1963-1964          | Other survey                           | SBH        |
| Oman      | 1966-1966          | Other survey                           | SBH        |



**Appendix Table 5. Under-5 mortality reference sources by source date and location, 1950-2017**

| Location     | Year range of data | Reference source                       | Data type  |
|--------------|--------------------|----------------------------------------|------------|
| Oman         | 1968-1973          | Other survey                           | SBH        |
| Oman         | 1971-1971          | Pan Arab Project for Child Development | HH         |
| Oman         | 1972-1972          | Pan Arab Project for Child Development | SBH        |
| Oman         | 1975-1975          | Pan Arab Project for Child Development | SBH        |
| Oman         | 1975-1976          | Other survey                           | SBH        |
| Oman         | 1976-1976          | Pan Arab Project for Child Development | HH         |
| Oman         | 1978-1978          | Pan Arab Project for Family Health     | HH         |
| Oman         | 1978-1978          | Pan Arab Project for Child Development | SBH        |
| Oman         | 1979-1979          | Census                                 | SBH        |
| Oman         | 1981-1981          | Pan Arab Project for Child Development | HH         |
| Oman         | 1981-1981          | Pan Arab Project for Child Development | SBH        |
| Oman         | 1982-1982          | Census                                 | SBH        |
| Oman         | 1983-1983          | Pan Arab Project for Family Health     | HH         |
| Oman         | 1984-1984          | Pan Arab Project for Child Development | SBH        |
| Oman         | 1985-1985          | Census                                 | SBH        |
| Oman         | 1986-1986          | Pan Arab Project for Child Development | HH         |
| Oman         | 1986-1986          | Pan Arab Project for Child Development | SBH        |
| Oman         | 1987-1987          | Pan Arab Project for Family Health     | HH         |
| Oman         | 1988-1988          | Census                                 | SBH        |
| Oman         | 1990-1990          | Census                                 | SBH        |
| Oman         | 1992-1992          | Census                                 | SBH        |
| Oman         | 1993-1993          | Pan Arab Project for Family Health     | HH         |
| Oman         | 1999-1999          | Multiple Indicator Cluster Survey      | HH         |
| Oman         | 2004-2004          | Multiple Indicator Cluster Survey      | HH         |
| Oman         | 2004-2014          | Vital Registration                     | VR/SRS/DSP |
| Oman         | 2009-2009          | Multiple Indicator Cluster Survey      | HH         |
| Oman         | 2016-2016          | Vital Registration                     | VR/SRS/DSP |
| Qatar        | 1970-1970          | Pan Arab Project for Child Development | HH         |
| Qatar        | 1973-1973          | Pan Arab Project for Child Development | SBH        |
| Qatar        | 1975-1975          | Pan Arab Project for Child Development | HH         |
| Qatar        | 1975-1975          | Pan Arab Project for Child Development | SBH        |
| Qatar        | 1979-1979          | Pan Arab Project for Family Health     | HH         |
| Qatar        | 1980-1980          | Pan Arab Project for Child Development | HH         |
| Qatar        | 1980-1980          | Pan Arab Project for Child Development | SBH        |
| Qatar        | 1981-2016          | Vital Registration                     | VR/SRS/DSP |
| Qatar        | 1984-1984          | Pan Arab Project for Family Health     | HH         |
| Qatar        | 1985-1985          | Pan Arab Project for Child Development | HH         |
| Qatar        | 1985-1985          | Pan Arab Project for Child Development | SBH        |
| Qatar        | 1989-1989          | Pan Arab Project for Family Health     | HH         |
| Qatar        | 1994-1994          | Pan Arab Project for Family Health     | HH         |
| Saudi Arabia | 1971-1971          | Pan Arab Project for Child Development | SBH        |
| Saudi Arabia | 1975-1975          | Pan Arab Project for Child Development | SBH        |
| Saudi Arabia | 1976-1976          | Other survey                           | SBH        |
| Saudi Arabia | 1978-1978          | Pan Arab Project for Family Health     | HH         |
| Saudi Arabia | 1978-1978          | Pan Arab Project for Child Development | SBH        |
| Saudi Arabia | 1979-1979          | Other survey                           | SBH        |
| Saudi Arabia | 1980-1981          | Pan Arab Project for Child Development | SBH        |
| Saudi Arabia | 1982-1982          | Other survey                           | SBH        |

**Appendix Table 5. Under-5 mortality reference sources by source date and location, 1950-2017**

| Location     | Year range of data | Reference source                       | Data type  |
|--------------|--------------------|----------------------------------------|------------|
| Saudi Arabia | 1984-1984          | Pan Arab Project for Family Health     | HH         |
| Saudi Arabia | 1984-1984          | Pan Arab Project for Child Development | SBH        |
| Saudi Arabia | 1984-1984          | Other survey                           | SBH        |
| Saudi Arabia | 1987-1987          | Other survey                           | SBH        |
| Saudi Arabia | 1988-1988          | Pan Arab Project for Family Health     | HH         |
| Saudi Arabia | 1989-1989          | Other survey                           | SBH        |
| Saudi Arabia | 1994-1994          | Pan Arab Project for Family Health     | HH         |
| Saudi Arabia | 2004-2004          | Census                                 | HH         |
| Saudi Arabia | 2006-2006          | Other survey                           | HH         |
| Saudi Arabia | 2016-2016          | Other survey                           | HH         |
| Sudan        | 1955-1978          | World Fertility Survey                 | CBH        |
| Sudan        | 1962-1989          | Standard demographic and health survey | CBH        |
| Sudan        | 1963-1992          | Pan Arab Project for Child Development | CBH        |
| Sudan        | 1964-1964          | Census                                 | SBH        |
| Sudan        | 1965-1989          | Standard demographic and health survey | SBH        |
| Sudan        | 1968-1968          | Census                                 | SBH        |
| Sudan        | 1968-1992          | Pan Arab Project for Child Development | SBH        |
| Sudan        | 1971-1971          | Census                                 | SBH        |
| Sudan        | 1974-1974          | Census                                 | SBH        |
| Sudan        | 1977-1979          | Census                                 | SBH        |
| Sudan        | 1981-1981          | Census                                 | SBH        |
| Sudan        | 1982-2014          | Multiple Indicator Cluster Survey      | CBH        |
| Sudan        | 1985-1985          | Census                                 | SBH        |
| Sudan        | 1985-2014          | Multiple Indicator Cluster Survey      | SBH        |
| Sudan        | 1987-1987          | Census                                 | SBH        |
| Sudan        | 1990-2007          | Census                                 | SBH        |
| Sudan        | 1997-1997          | Multiple Indicator Cluster Survey      | HH         |
| Sudan        | 2002-2002          | Multiple Indicator Cluster Survey      | HH         |
| Sudan        | 2003-2003          | Pan Arab Project for Family Health     | HH         |
| Sudan        | 2007-2007          | Multiple Indicator Cluster Survey      | HH         |
| Syria        | 1953-1953          | Census                                 | SBH        |
| Syria        | 1953-1977          | World Fertility Survey                 | SBH        |
| Syria        | 1953-1978          | World Fertility Survey                 | CBH        |
| Syria        | 1956-1956          | Census                                 | SBH        |
| Syria        | 1959-1959          | Census                                 | SBH        |
| Syria        | 1961-1961          | Census                                 | SBH        |
| Syria        | 1963-1992          | Pan Arab Project for Child Development | CBH        |
| Syria        | 1964-1964          | Census                                 | SBH        |
| Syria        | 1964-1978          | Vital Registration                     | VR/SRS/DSP |
| Syria        | 1966-1966          | Census                                 | SBH        |
| Syria        | 1968-1992          | Pan Arab Project for Child Development | SBH        |
| Syria        | 1974-2009          | Pan Arab Project for Family Health     | CBH        |
| Syria        | 1976-1976          | Census                                 | SBH        |
| Syria        | 1976-2000          | Pan Arab Project for Family Health     | SBH        |
| Syria        | 1980-1980          | Census                                 | SBH        |
| Syria        | 1981-2005          | Multiple Indicator Cluster Survey      | SBH        |
| Syria        | 1983-1983          | Census                                 | SBH        |
| Syria        | 1983-1985          | Vital Registration                     | VR/SRS/DSP |

**Appendix Table 5. Under-5 mortality reference sources by source date and location, 1950-2017**

| Location | Year range of data | Reference source                       | Data type  |
|----------|--------------------|----------------------------------------|------------|
| Syria    | 1985-1985          | Census                                 | SBH        |
| Syria    | 1988-1988          | Census                                 | SBH        |
| Syria    | 1990-1990          | Census                                 | SBH        |
| Syria    | 1998-2010          | Vital Registration                     | VR/SRS/DSP |
| Tunisia  | 1953-1978          | World Fertility Survey                 | CBH        |
| Tunisia  | 1954-1978          | World Fertility Survey                 | SBH        |
| Tunisia  | 1960-1960          | Vital Registration                     | VR/SRS/DSP |
| Tunisia  | 1963-1988          | Standard demographic and health survey | CBH        |
| Tunisia  | 1964-1988          | Standard demographic and health survey | SBH        |
| Tunisia  | 1965-1965          | Other survey                           | SBH        |
| Tunisia  | 1965-1994          | Pan Arab Project for Child Development | CBH        |
| Tunisia  | 1968-1968          | Other survey                           | SBH        |
| Tunisia  | 1968-1974          | Vital Registration                     | VR/SRS/DSP |
| Tunisia  | 1970-1970          | Census                                 | SBH        |
| Tunisia  | 1970-1994          | Pan Arab Project for Child Development | SBH        |
| Tunisia  | 1971-1971          | Other survey                           | SBH        |
| Tunisia  | 1973-1973          | Census                                 | SBH        |
| Tunisia  | 1974-1974          | Other survey                           | SBH        |
| Tunisia  | 1976-1976          | Census                                 | SBH        |
| Tunisia  | 1976-1980          | Vital Registration                     | VR/SRS/DSP |
| Tunisia  | 1976-2000          | Pan Arab Project for Family Health     | SBH        |
| Tunisia  | 1976-2001          | Pan Arab Project for Family Health     | CBH        |
| Tunisia  | 1977-1977          | Other survey                           | SBH        |
| Tunisia  | 1978-1978          | Census                                 | SBH        |
| Tunisia  | 1979-1979          | Other survey                           | SBH        |
| Tunisia  | 1980-1980          | Census                                 | SBH        |
| Tunisia  | 1986-2008          | Multiple Indicator Cluster Survey      | CBH        |
| Tunisia  | 1987-1989          | Vital Registration                     | VR/SRS/DSP |
| Tunisia  | 1987-2008          | Multiple Indicator Cluster Survey      | SBH        |
| Tunisia  | 1993-1995          | Vital Registration                     | VR/SRS/DSP |
| Tunisia  | 1998-1998          | Vital Registration                     | VR/SRS/DSP |
| Tunisia  | 2010-2011          | Multiple Indicator Cluster Survey      | CBH        |
| Tunisia  | 2010-2011          | Multiple Indicator Cluster Survey      | SBH        |
| Turkey   | 1951-1951          | Census                                 | SBH        |
| Turkey   | 1953-1978          | World Fertility Survey                 | CBH        |
| Turkey   | 1954-1978          | World Fertility Survey                 | SBH        |
| Turkey   | 1955-1955          | Census                                 | SBH        |
| Turkey   | 1958-1958          | Census                                 | SBH        |
| Turkey   | 1960-1999          | Census                                 | SBH        |
| Turkey   | 1962-2010          | Other survey                           | SBH        |
| Turkey   | 1966-2008          | Standard demographic and health survey | CBH        |
| Turkey   | 1969-2003          | Standard demographic and health survey | SBH        |
| Turkey   | 1978-1979          | Vital Registration                     | VR/SRS/DSP |
| Turkey   | 1981-1984          | Vital Registration                     | VR/SRS/DSP |
| Turkey   | 1984-2008          | Other demographic and health survey    | SBH        |
| Turkey   | 1987-2016          | Vital Registration                     | VR/SRS/DSP |
| Turkey   | 2000-2000          | Other demographic and health survey    | HH         |
| Turkey   | 2005-2005          | Other demographic and health survey    | HH         |

**Appendix Table 5. Under-5 mortality reference sources by source date and location, 1950-2017**

| Location             | Year range of data | Reference source                       | Data type  |
|----------------------|--------------------|----------------------------------------|------------|
| Turkey               | 2010-2010          | Other demographic and health survey    | HH         |
| Turkey               | 2010-2010          | Other demographic and health survey    | SBH        |
| United Arab Emirates | 1956-1956          | Census                                 | SBH        |
| United Arab Emirates | 1959-1959          | Census                                 | SBH        |
| United Arab Emirates | 1963-1963          | Census                                 | SBH        |
| United Arab Emirates | 1966-1966          | Census                                 | SBH        |
| United Arab Emirates | 1969-1969          | Census                                 | SBH        |
| United Arab Emirates | 1970-1970          | Pan Arab Project for Child Development | SBH        |
| United Arab Emirates | 1971-1971          | Census                                 | SBH        |
| United Arab Emirates | 1974-1974          | Pan Arab Project for Child Development | SBH        |
| United Arab Emirates | 1977-1977          | Pan Arab Project for Family Health     | HH         |
| United Arab Emirates | 1977-1977          | Pan Arab Project for Child Development | SBH        |
| United Arab Emirates | 1979-1979          | Pan Arab Project for Child Development | SBH        |
| United Arab Emirates | 1981-1981          | Pan Arab Project for Child Development | SBH        |
| United Arab Emirates | 1982-1982          | Pan Arab Project for Family Health     | HH         |
| United Arab Emirates | 1987-1987          | Pan Arab Project for Family Health     | HH         |
| United Arab Emirates | 1992-1992          | Pan Arab Project for Family Health     | HH         |
| United Arab Emirates | 1995-1999          | Vital Registration                     | VR/SRS/DSP |
| United Arab Emirates | 2001-2007          | Vital Registration                     | VR/SRS/DSP |
| Yemen                | 1955-1979          | World Fertility Survey                 | SBH        |
| Yemen                | 1960-1979          | World Fertility Survey                 | CBH        |
| Yemen                | 1962-2013          | Standard demographic and health survey | CBH        |
| Yemen                | 1967-2013          | Standard demographic and health survey | SBH        |
| Yemen                | 1973-2002          | Pan Arab Project for Family Health     | CBH        |
| Yemen                | 1975-1975          | Standard demographic and health survey | HH         |
| Yemen                | 1976-1976          | Census                                 | SBH        |
| Yemen                | 1978-2002          | Pan Arab Project for Family Health     | SBH        |
| Yemen                | 1980-1980          | Census                                 | SBH        |
| Yemen                | 1980-1980          | Standard demographic and health survey | HH         |
| Yemen                | 1981-2006          | Multiple Indicator Cluster Survey      | CBH        |
| Yemen                | 1982-2006          | Multiple Indicator Cluster Survey      | SBH        |
| Yemen                | 1983-1983          | Census                                 | SBH        |
| Yemen                | 1985-1985          | Standard demographic and health survey | HH         |
| Yemen                | 1986-1986          | Census                                 | SBH        |
| Yemen                | 1988-1988          | Census                                 | SBH        |
| Yemen                | 1988-2012          | Other survey                           | SBH        |
| Yemen                | 1990-1990          | Census                                 | SBH        |
| Yemen                | 1990-1990          | Standard demographic and health survey | HH         |
| Yemen                | 1995-1995          | Standard demographic and health survey | HH         |
| Yemen                | 2004-2004          | Other survey                           | HH         |
| Bangladesh           | 1950-1970          | World Fertility Survey                 | CBH        |
| Bangladesh           | 1951-1970          | World Fertility Survey                 | SBH        |
| Bangladesh           | 1955-1955          | Other survey                           | SBH        |
| Bangladesh           | 1959-1959          | Other survey                           | SBH        |
| Bangladesh           | 1962-1963          | Other survey                           | SBH        |
| Bangladesh           | 1964-1970          | Standard demographic and health survey | CBH        |
| Bangladesh           | 1965-1965          | Other survey                           | SBH        |
| Bangladesh           | 1967-1968          | Other survey                           | SBH        |

**Appendix Table 5. Under-5 mortality reference sources by source date and location, 1950-2017**

| Location   | Year range of data | Reference source                       | Data type  |
|------------|--------------------|----------------------------------------|------------|
| Bangladesh | 1967-1970          | Other demographic and health survey    | CBH        |
| Bangladesh | 1969-1970          | Standard demographic and health survey | SBH        |
| Bangladesh | 1970-1970          | Other survey                           | SBH        |
| Bangladesh | 1972-1972          | Other survey                           | SBH        |
| Bangladesh | 1972-1973          | Standard demographic and health survey | CBH        |
| Bangladesh | 1972-1973          | Standard demographic and health survey | SBH        |
| Bangladesh | 1972-1973          | Other demographic and health survey    | CBH        |
| Bangladesh | 1972-1973          | World Fertility Survey                 | CBH        |
| Bangladesh | 1972-1973          | World Fertility Survey                 | SBH        |
| Bangladesh | 1975-1975          | World Fertility Survey                 | CBH        |
| Bangladesh | 1975-1975          | World Fertility Survey                 | SBH        |
| Bangladesh | 1975-2000          | Other demographic and health survey    | CBH        |
| Bangladesh | 1975-2014          | Standard demographic and health survey | CBH        |
| Bangladesh | 1975-2014          | Standard demographic and health survey | SBH        |
| Bangladesh | 1976-1976          | Other survey                           | SBH        |
| Bangladesh | 1976-2000          | Other demographic and health survey    | SBH        |
| Bangladesh | 1980-2010          | Sample Registrations System            | VR/SRS/DSP |
| Bangladesh | 1988-2012          | Multiple Indicator Cluster Survey      | SBH        |
| Bangladesh | 1990-1990          | Census                                 | SBH        |
| Bangladesh | 1993-1993          | Census                                 | SBH        |
| Bangladesh | 1998-1998          | Census                                 | SBH        |
| Bangladesh | 2002-2002          | Census                                 | SBH        |
| Bangladesh | 2005-2005          | Census                                 | SBH        |
| Bangladesh | 2008-2008          | Census                                 | SBH        |
| Bangladesh | 2012-2014          | Sample Registrations System            | VR/SRS/DSP |
| Bhutan     | 1980-2004          | Census                                 | SBH        |
| Bhutan     | 1985-2009          | Multiple Indicator Cluster Survey      | SBH        |
| Bhutan     | 1992-1993          | Other survey                           | HH         |
| India      | 1950-1964          | Vital Registration                     | VR/SRS/DSP |
| India      | 1960-2016          | Standard demographic and health survey | CBH        |
| India      | 1961-1961          | Census                                 | SBH        |
| India      | 1965-1965          | Census                                 | SBH        |
| India      | 1968-2015          | Standard demographic and health survey | SBH        |
| India      | 1969-1969          | Census                                 | SBH        |
| India      | 1970-1980          | Sample Registrations System            | VR/SRS/DSP |
| India      | 1971-1972          | Census                                 | SBH        |
| India      | 1974-1975          | Census                                 | SBH        |
| India      | 1974-2013          | Other survey                           | SBH        |
| India      | 1976-2013          | Other survey                           | CBH        |
| India      | 1977-1978          | Census                                 | SBH        |
| India      | 1981-1982          | Census                                 | SBH        |
| India      | 1983-1984          | Sample Registrations System            | VR/SRS/DSP |
| India      | 1984-1985          | Census                                 | SBH        |
| India      | 1986-1986          | Sample Registrations System            | VR/SRS/DSP |
| India      | 1987-1988          | Census                                 | SBH        |
| India      | 1988-1989          | Sample Registrations System            | VR/SRS/DSP |
| India      | 1991-1992          | Census                                 | SBH        |
| India      | 1992-1992          | Sample Registrations System            | VR/SRS/DSP |

**Appendix Table 5. Under-5 mortality reference sources by source date and location, 1950-2017**

| Location          | Year range of data | Reference source                       | Data type  |
|-------------------|--------------------|----------------------------------------|------------|
| India             | 1994-1995          | Census                                 | SBH        |
| India             | 1995-1995          | Sample Registrations System            | VR/SRS/DSP |
| India             | 1997-2016          | Sample Registrations System            | VR/SRS/DSP |
| India             | 1998-1998          | Census                                 | SBH        |
| India             | 2002-2002          | Census                                 | SBH        |
| India             | 2005-2005          | Census                                 | SBH        |
| India             | 2008-2008          | Census                                 | SBH        |
| Andhra Pradesh    | 1979-2007          | Other survey                           | SBH        |
| Andhra Pradesh    | 1986-2015          | Standard demographic and health survey | CBH        |
| Andhra Pradesh    | 1990-2005          | Other survey                           | CBH        |
| Andhra Pradesh    | 1990-2013          | Standard demographic and health survey | SBH        |
| Andhra Pradesh    | 2013-2015          | Vital Registration                     | VR/SRS/DSP |
| Andhra Pradesh    | 2014-2016          | Sample Registrations System            | VR/SRS/DSP |
| Arunachal Pradesh | 1968-2016          | Standard demographic and health survey | SBH        |
| Arunachal Pradesh | 1974-2013          | Other survey                           | SBH        |
| Arunachal Pradesh | 1977-2016          | Standard demographic and health survey | CBH        |
| Arunachal Pradesh | 1982-1982          | Census                                 | SBH        |
| Arunachal Pradesh | 1985-1985          | Census                                 | SBH        |
| Arunachal Pradesh | 1989-1989          | Census                                 | SBH        |
| Arunachal Pradesh | 1991-1992          | Census                                 | SBH        |
| Arunachal Pradesh | 1995-1995          | Census                                 | SBH        |
| Arunachal Pradesh | 1997-1999          | Census                                 | SBH        |
| Arunachal Pradesh | 2002-2002          | Census                                 | SBH        |
| Arunachal Pradesh | 2005-2005          | Census                                 | SBH        |
| Arunachal Pradesh | 2007-2008          | Census                                 | SBH        |
| Arunachal Pradesh | 2012-2013          | Vital Registration                     | VR/SRS/DSP |
| Arunachal Pradesh | 2015-2015          | Vital Registration                     | VR/SRS/DSP |
| Assam             | 1968-2015          | Standard demographic and health survey | SBH        |
| Assam             | 1969-2015          | Standard demographic and health survey | CBH        |
| Assam             | 1974-2013          | Other survey                           | SBH        |
| Assam             | 1981-1981          | Census                                 | SBH        |
| Assam             | 1985-1985          | Census                                 | SBH        |
| Assam             | 1988-1988          | Census                                 | SBH        |
| Assam             | 1988-2005          | Other survey                           | CBH        |
| Assam             | 1991-1992          | Census                                 | SBH        |
| Assam             | 1994-1995          | Census                                 | SBH        |
| Assam             | 1995-2016          | Sample Registrations System            | VR/SRS/DSP |
| Assam             | 1998-1998          | Census                                 | SBH        |
| Assam             | 2002-2002          | Census                                 | SBH        |
| Assam             | 2005-2005          | Census                                 | SBH        |
| Assam             | 2008-2008          | Census                                 | SBH        |
| Assam             | 2015-2015          | Vital Registration                     | VR/SRS/DSP |
| Bihar             | 1965-2015          | Standard demographic and health survey | CBH        |
| Bihar             | 1968-2014          | Standard demographic and health survey | SBH        |
| Bihar             | 1974-2013          | Other survey                           | SBH        |
| Bihar             | 1981-1981          | Census                                 | SBH        |
| Bihar             | 1985-1985          | Census                                 | SBH        |
| Bihar             | 1986-2013          | Other survey                           | CBH        |

**Appendix Table 5. Under-5 mortality reference sources by source date and location, 1950-2017**

| Location     | Year range of data | Reference source                       | Data type  |
|--------------|--------------------|----------------------------------------|------------|
| Bihar        | 1989-1989          | Census                                 | SBH        |
| Bihar        | 1991-1992          | Census                                 | SBH        |
| Bihar        | 1995-1995          | Census                                 | SBH        |
| Bihar        | 1998-1999          | Census                                 | SBH        |
| Bihar        | 2002-2002          | Census                                 | SBH        |
| Bihar        | 2004-2016          | Sample Registrations System            | VR/SRS/DSP |
| Bihar        | 2005-2005          | Census                                 | SBH        |
| Bihar        | 2007-2008          | Census                                 | SBH        |
| Bihar        | 2010-2010          | Vital Registration                     | VR/SRS/DSP |
| Chhattisgarh | 1979-2013          | Other survey                           | SBH        |
| Chhattisgarh | 1980-2015          | Standard demographic and health survey | CBH        |
| Chhattisgarh | 1981-1981          | Census                                 | SBH        |
| Chhattisgarh | 1981-2015          | Standard demographic and health survey | SBH        |
| Chhattisgarh | 1984-1984          | Census                                 | SBH        |
| Chhattisgarh | 1987-2013          | Other survey                           | CBH        |
| Chhattisgarh | 1988-1988          | Census                                 | SBH        |
| Chhattisgarh | 1991-1992          | Census                                 | SBH        |
| Chhattisgarh | 1994-1995          | Census                                 | SBH        |
| Chhattisgarh | 1998-1998          | Census                                 | SBH        |
| Chhattisgarh | 2002-2002          | Census                                 | SBH        |
| Chhattisgarh | 2004-2016          | Sample Registrations System            | VR/SRS/DSP |
| Chhattisgarh | 2005-2005          | Census                                 | SBH        |
| Chhattisgarh | 2008-2008          | Census                                 | SBH        |
| Chhattisgarh | 2014-2015          | Vital Registration                     | VR/SRS/DSP |
| Delhi        | 1967-2016          | Standard demographic and health survey | CBH        |
| Delhi        | 1968-2015          | Standard demographic and health survey | SBH        |
| Delhi        | 1974-2013          | Other survey                           | SBH        |
| Delhi        | 1981-1981          | Census                                 | SBH        |
| Delhi        | 1984-1984          | Census                                 | SBH        |
| Delhi        | 1988-1988          | Census                                 | SBH        |
| Delhi        | 1990-1990          | Census                                 | SBH        |
| Delhi        | 1991-1996          | Other survey                           | CBH        |
| Delhi        | 1992-1992          | Census                                 | SBH        |
| Delhi        | 1994-1995          | Census                                 | SBH        |
| Delhi        | 1998-1998          | Census                                 | SBH        |
| Delhi        | 2000-2013          | Other survey                           | CBH        |
| Delhi        | 2002-2002          | Census                                 | SBH        |
| Delhi        | 2004-2016          | Sample Registrations System            | VR/SRS/DSP |
| Delhi        | 2005-2005          | Census                                 | SBH        |
| Delhi        | 2008-2008          | Census                                 | SBH        |
| Delhi        | 2009-2013          | Vital Registration                     | VR/SRS/DSP |
| Goa          | 1967-2012          | Standard demographic and health survey | CBH        |
| Goa          | 1968-2014          | Standard demographic and health survey | SBH        |
| Goa          | 1974-2007          | Other survey                           | SBH        |
| Goa          | 1980-1980          | Census                                 | SBH        |
| Goa          | 1984-1984          | Census                                 | SBH        |
| Goa          | 1988-1989          | Census                                 | SBH        |
| Goa          | 1991-1991          | Census                                 | SBH        |

**Appendix Table 5. Under-5 mortality reference sources by source date and location, 1950-2017**

| Location         | Year range of data | Reference source                       | Data type  |
|------------------|--------------------|----------------------------------------|------------|
| Goa              | 1993-1993          | Census                                 | SBH        |
| Goa              | 1993-1994          | Other survey                           | CBH        |
| Goa              | 1995-1995          | Census                                 | SBH        |
| Goa              | 1997-1998          | Census                                 | SBH        |
| Goa              | 1997-1998          | Other survey                           | CBH        |
| Goa              | 2001-2001          | Census                                 | SBH        |
| Goa              | 2001-2002          | Other survey                           | CBH        |
| Goa              | 2005-2005          | Census                                 | SBH        |
| Goa              | 2008-2008          | Census                                 | SBH        |
| Goa              | 2009-2015          | Vital Registration                     | VR/SRS/DSP |
| Gujarat          | 1967-2015          | Standard demographic and health survey | CBH        |
| Gujarat          | 1968-2015          | Standard demographic and health survey | SBH        |
| Gujarat          | 1974-2007          | Other survey                           | SBH        |
| Gujarat          | 1981-1981          | Census                                 | SBH        |
| Gujarat          | 1984-1984          | Census                                 | SBH        |
| Gujarat          | 1984-2013          | Other survey                           | CBH        |
| Gujarat          | 1988-1988          | Census                                 | SBH        |
| Gujarat          | 1991-1992          | Census                                 | SBH        |
| Gujarat          | 1994-1995          | Census                                 | SBH        |
| Gujarat          | 1995-2016          | Sample Registrations System            | VR/SRS/DSP |
| Gujarat          | 1998-1999          | Census                                 | SBH        |
| Gujarat          | 2002-2002          | Census                                 | SBH        |
| Gujarat          | 2005-2005          | Census                                 | SBH        |
| Gujarat          | 2008-2008          | Census                                 | SBH        |
| Gujarat          | 2009-2013          | Vital Registration                     | VR/SRS/DSP |
| Haryana          | 1968-2014          | Standard demographic and health survey | SBH        |
| Haryana          | 1971-2014          | Standard demographic and health survey | CBH        |
| Haryana          | 1974-2013          | Other survey                           | SBH        |
| Haryana          | 1981-1981          | Census                                 | SBH        |
| Haryana          | 1984-1984          | Census                                 | SBH        |
| Haryana          | 1985-2013          | Other survey                           | CBH        |
| Haryana          | 1988-1988          | Census                                 | SBH        |
| Haryana          | 1990-1990          | Census                                 | SBH        |
| Haryana          | 1992-1992          | Census                                 | SBH        |
| Haryana          | 1994-1995          | Census                                 | SBH        |
| Haryana          | 1995-2016          | Sample Registrations System            | VR/SRS/DSP |
| Haryana          | 1997-1999          | Census                                 | SBH        |
| Haryana          | 2002-2002          | Census                                 | SBH        |
| Haryana          | 2005-2005          | Census                                 | SBH        |
| Haryana          | 2007-2008          | Census                                 | SBH        |
| Himachal Pradesh | 1968-2015          | Standard demographic and health survey | SBH        |
| Himachal Pradesh | 1969-2016          | Standard demographic and health survey | CBH        |
| Himachal Pradesh | 1974-2013          | Other survey                           | SBH        |
| Himachal Pradesh | 1981-1981          | Census                                 | SBH        |
| Himachal Pradesh | 1984-1984          | Census                                 | SBH        |
| Himachal Pradesh | 1985-2012          | Other survey                           | CBH        |
| Himachal Pradesh | 1988-1988          | Census                                 | SBH        |
| Himachal Pradesh | 1990-1992          | Census                                 | SBH        |



**Appendix Table 5. Under-5 mortality reference sources by source date and location, 1950-2017**

| Location          | Year range of data | Reference source                       | Data type  |
|-------------------|--------------------|----------------------------------------|------------|
| Himachal Pradesh  | 1994-1995          | Census                                 | SBH        |
| Himachal Pradesh  | 1995-2016          | Sample Registrations System            | VR/SRS/DSP |
| Himachal Pradesh  | 1998-1999          | Census                                 | SBH        |
| Himachal Pradesh  | 2002-2002          | Census                                 | SBH        |
| Himachal Pradesh  | 2005-2005          | Census                                 | SBH        |
| Himachal Pradesh  | 2007-2008          | Census                                 | SBH        |
| Himachal Pradesh  | 2009-2013          | Vital Registration                     | VR/SRS/DSP |
| Jammu and Kashmir | 1968-2015          | Standard demographic and health survey | SBH        |
| Jammu and Kashmir | 1969-2016          | Standard demographic and health survey | CBH        |
| Jammu and Kashmir | 1974-2013          | Other survey                           | SBH        |
| Jammu and Kashmir | 1981-1981          | Census                                 | SBH        |
| Jammu and Kashmir | 1985-1985          | Census                                 | SBH        |
| Jammu and Kashmir | 1988-1988          | Census                                 | SBH        |
| Jammu and Kashmir | 1990-2013          | Other survey                           | CBH        |
| Jammu and Kashmir | 1991-1992          | Census                                 | SBH        |
| Jammu and Kashmir | 1995-1995          | Census                                 | SBH        |
| Jammu and Kashmir | 1998-1999          | Census                                 | SBH        |
| Jammu and Kashmir | 2002-2002          | Census                                 | SBH        |
| Jammu and Kashmir | 2004-2016          | Sample Registrations System            | VR/SRS/DSP |
| Jammu and Kashmir | 2005-2005          | Census                                 | SBH        |
| Jammu and Kashmir | 2007-2008          | Census                                 | SBH        |
| Jammu and Kashmir | 2009-2011          | Vital Registration                     | VR/SRS/DSP |
| Jammu and Kashmir | 2013-2013          | Vital Registration                     | VR/SRS/DSP |
| Jammu and Kashmir | 2015-2015          | Vital Registration                     | VR/SRS/DSP |
| Jharkhand         | 1979-2013          | Other survey                           | SBH        |
| Jharkhand         | 1981-1981          | Census                                 | SBH        |
| Jharkhand         | 1981-2016          | Standard demographic and health survey | SBH        |
| Jharkhand         | 1983-2016          | Standard demographic and health survey | CBH        |
| Jharkhand         | 1984-1984          | Census                                 | SBH        |
| Jharkhand         | 1987-2013          | Other survey                           | CBH        |
| Jharkhand         | 1988-1988          | Census                                 | SBH        |
| Jharkhand         | 1991-1992          | Census                                 | SBH        |
| Jharkhand         | 1995-1995          | Census                                 | SBH        |
| Jharkhand         | 1998-1998          | Census                                 | SBH        |
| Jharkhand         | 2002-2002          | Census                                 | SBH        |
| Jharkhand         | 2004-2016          | Sample Registrations System            | VR/SRS/DSP |
| Jharkhand         | 2005-2005          | Census                                 | SBH        |
| Jharkhand         | 2008-2008          | Census                                 | SBH        |
| Karnataka         | 1965-2014          | Standard demographic and health survey | CBH        |
| Karnataka         | 1968-2014          | Standard demographic and health survey | SBH        |
| Karnataka         | 1974-2007          | Other survey                           | SBH        |
| Karnataka         | 1980-2012          | Other survey                           | CBH        |
| Karnataka         | 1981-1981          | Census                                 | SBH        |
| Karnataka         | 1984-1984          | Census                                 | SBH        |
| Karnataka         | 1988-1988          | Census                                 | SBH        |
| Karnataka         | 1990-1990          | Census                                 | SBH        |
| Karnataka         | 1992-1992          | Census                                 | SBH        |
| Karnataka         | 1994-1995          | Census                                 | SBH        |

**Appendix Table 5. Under-5 mortality reference sources by source date and location, 1950-2017**

| Location       | Year range of data | Reference source                       | Data type  |
|----------------|--------------------|----------------------------------------|------------|
| Karnataka      | 1995-2016          | Sample Registrations System            | VR/SRS/DSP |
| Karnataka      | 1998-1999          | Census                                 | SBH        |
| Karnataka      | 2002-2002          | Census                                 | SBH        |
| Karnataka      | 2005-2005          | Census                                 | SBH        |
| Karnataka      | 2007-2008          | Census                                 | SBH        |
| Karnataka      | 2009-2015          | Vital Registration                     | VR/SRS/DSP |
| Kerala         | 1967-2016          | Standard demographic and health survey | CBH        |
| Kerala         | 1968-2015          | Standard demographic and health survey | SBH        |
| Kerala         | 1974-2007          | Other survey                           | SBH        |
| Kerala         | 1980-1980          | Census                                 | SBH        |
| Kerala         | 1984-1984          | Census                                 | SBH        |
| Kerala         | 1986-2001          | Other survey                           | CBH        |
| Kerala         | 1988-1988          | Census                                 | SBH        |
| Kerala         | 1990-1993          | Census                                 | SBH        |
| Kerala         | 1995-1995          | Census                                 | SBH        |
| Kerala         | 1995-2016          | Sample Registrations System            | VR/SRS/DSP |
| Kerala         | 1998-1998          | Census                                 | SBH        |
| Kerala         | 2002-2002          | Census                                 | SBH        |
| Kerala         | 2004-2005          | Other survey                           | CBH        |
| Kerala         | 2005-2005          | Census                                 | SBH        |
| Kerala         | 2007-2008          | Census                                 | SBH        |
| Kerala         | 2009-2015          | Vital Registration                     | VR/SRS/DSP |
| Madhya Pradesh | 1964-2014          | Standard demographic and health survey | CBH        |
| Madhya Pradesh | 1968-2014          | Standard demographic and health survey | SBH        |
| Madhya Pradesh | 1974-2013          | Other survey                           | SBH        |
| Madhya Pradesh | 1981-1981          | Census                                 | SBH        |
| Madhya Pradesh | 1984-2013          | Other survey                           | CBH        |
| Madhya Pradesh | 1985-1985          | Census                                 | SBH        |
| Madhya Pradesh | 1988-1988          | Census                                 | SBH        |
| Madhya Pradesh | 1991-1992          | Census                                 | SBH        |
| Madhya Pradesh | 1994-1995          | Census                                 | SBH        |
| Madhya Pradesh | 1998-1999          | Census                                 | SBH        |
| Madhya Pradesh | 2002-2002          | Census                                 | SBH        |
| Madhya Pradesh | 2004-2016          | Sample Registrations System            | VR/SRS/DSP |
| Madhya Pradesh | 2005-2005          | Census                                 | SBH        |
| Madhya Pradesh | 2007-2008          | Census                                 | SBH        |
| Madhya Pradesh | 2009-2015          | Vital Registration                     | VR/SRS/DSP |
| Maharashtra    | 1967-2015          | Standard demographic and health survey | CBH        |
| Maharashtra    | 1968-2014          | Standard demographic and health survey | SBH        |
| Maharashtra    | 1974-2007          | Other survey                           | SBH        |
| Maharashtra    | 1980-1980          | Census                                 | SBH        |
| Maharashtra    | 1981-2013          | Other survey                           | CBH        |
| Maharashtra    | 1984-1984          | Census                                 | SBH        |
| Maharashtra    | 1988-1988          | Census                                 | SBH        |
| Maharashtra    | 1990-1992          | Census                                 | SBH        |
| Maharashtra    | 1994-1995          | Census                                 | SBH        |
| Maharashtra    | 1995-2016          | Sample Registrations System            | VR/SRS/DSP |
| Maharashtra    | 1998-1999          | Census                                 | SBH        |

**Appendix Table 5. Under-5 mortality reference sources by source date and location, 1950-2017**

| Location    | Year range of data | Reference source                       | Data type  |
|-------------|--------------------|----------------------------------------|------------|
| Maharashtra | 2002-2002          | Census                                 | SBH        |
| Maharashtra | 2005-2005          | Census                                 | SBH        |
| Maharashtra | 2007-2008          | Census                                 | SBH        |
| Maharashtra | 2009-2009          | Vital Registration                     | VR/SRS/DSP |
| Maharashtra | 2012-2012          | Vital Registration                     | VR/SRS/DSP |
| Maharashtra | 2015-2015          | Vital Registration                     | VR/SRS/DSP |
| Manipur     | 1968-2014          | Standard demographic and health survey | SBH        |
| Manipur     | 1974-2007          | Other survey                           | SBH        |
| Manipur     | 1975-2015          | Standard demographic and health survey | CBH        |
| Manipur     | 1981-1981          | Census                                 | SBH        |
| Manipur     | 1985-1985          | Census                                 | SBH        |
| Manipur     | 1988-1988          | Census                                 | SBH        |
| Manipur     | 1991-1992          | Census                                 | SBH        |
| Manipur     | 1992-1993          | Other survey                           | CBH        |
| Manipur     | 1995-1995          | Census                                 | SBH        |
| Manipur     | 1996-1999          | Other survey                           | CBH        |
| Manipur     | 1998-1999          | Census                                 | SBH        |
| Manipur     | 2002-2002          | Census                                 | SBH        |
| Manipur     | 2002-2005          | Other survey                           | CBH        |
| Manipur     | 2005-2005          | Census                                 | SBH        |
| Manipur     | 2007-2008          | Census                                 | SBH        |
| Manipur     | 2009-2013          | Vital Registration                     | VR/SRS/DSP |
| Meghalaya   | 1968-2014          | Standard demographic and health survey | SBH        |
| Meghalaya   | 1974-2012          | Other survey                           | SBH        |
| Meghalaya   | 1975-2015          | Standard demographic and health survey | CBH        |
| Meghalaya   | 1982-1982          | Census                                 | SBH        |
| Meghalaya   | 1985-1985          | Census                                 | SBH        |
| Meghalaya   | 1989-1989          | Census                                 | SBH        |
| Meghalaya   | 1992-1992          | Census                                 | SBH        |
| Meghalaya   | 1994-1995          | Other survey                           | CBH        |
| Meghalaya   | 1995-1995          | Census                                 | SBH        |
| Meghalaya   | 1998-1999          | Census                                 | SBH        |
| Meghalaya   | 1998-1999          | Other survey                           | CBH        |
| Meghalaya   | 2002-2002          | Census                                 | SBH        |
| Meghalaya   | 2002-2005          | Other survey                           | CBH        |
| Meghalaya   | 2005-2005          | Census                                 | SBH        |
| Meghalaya   | 2008-2008          | Census                                 | SBH        |
| Meghalaya   | 2009-2013          | Vital Registration                     | VR/SRS/DSP |
| Meghalaya   | 2015-2015          | Vital Registration                     | VR/SRS/DSP |
| Mizoram     | 1968-2015          | Standard demographic and health survey | SBH        |
| Mizoram     | 1974-2013          | Other survey                           | SBH        |
| Mizoram     | 1975-2016          | Standard demographic and health survey | CBH        |
| Mizoram     | 1981-1981          | Census                                 | SBH        |
| Mizoram     | 1985-1985          | Census                                 | SBH        |
| Mizoram     | 1989-1989          | Census                                 | SBH        |
| Mizoram     | 1991-1992          | Census                                 | SBH        |
| Mizoram     | 1995-1999          | Census                                 | SBH        |
| Mizoram     | 2002-2002          | Census                                 | SBH        |

**Appendix Table 5. Under-5 mortality reference sources by source date and location, 1950-2017**

| Location | Year range of data | Reference source                       | Data type  |
|----------|--------------------|----------------------------------------|------------|
| Mizoram  | 2002-2005          | Other survey                           | CBH        |
| Mizoram  | 2005-2005          | Census                                 | SBH        |
| Mizoram  | 2007-2008          | Census                                 | SBH        |
| Mizoram  | 2009-2013          | Vital Registration                     | VR/SRS/DSP |
| Mizoram  | 2015-2015          | Vital Registration                     | VR/SRS/DSP |
| Nagaland | 1974-2013          | Other survey                           | SBH        |
| Nagaland | 1975-2015          | Standard demographic and health survey | SBH        |
| Nagaland | 1975-2016          | Standard demographic and health survey | CBH        |
| Nagaland | 1982-1982          | Census                                 | SBH        |
| Nagaland | 1985-1985          | Census                                 | SBH        |
| Nagaland | 1989-1989          | Census                                 | SBH        |
| Nagaland | 1992-1993          | Census                                 | SBH        |
| Nagaland | 1995-1995          | Census                                 | SBH        |
| Nagaland | 1998-1999          | Census                                 | SBH        |
| Nagaland | 2002-2002          | Census                                 | SBH        |
| Nagaland | 2005-2005          | Census                                 | SBH        |
| Nagaland | 2007-2008          | Census                                 | SBH        |
| Nagaland | 2009-2013          | Vital Registration                     | VR/SRS/DSP |
| Odisha   | 1967-2005          | Standard demographic and health survey | CBH        |
| Odisha   | 1968-2015          | Standard demographic and health survey | SBH        |
| Odisha   | 1974-2013          | Other survey                           | SBH        |
| Odisha   | 1981-1981          | Census                                 | SBH        |
| Odisha   | 1984-1984          | Census                                 | SBH        |
| Odisha   | 1984-2012          | Other survey                           | CBH        |
| Odisha   | 1988-1988          | Census                                 | SBH        |
| Odisha   | 1991-1992          | Census                                 | SBH        |
| Odisha   | 1994-1995          | Census                                 | SBH        |
| Odisha   | 1995-2016          | Sample Registrations System            | VR/SRS/DSP |
| Odisha   | 1998-1999          | Census                                 | SBH        |
| Odisha   | 2002-2002          | Census                                 | SBH        |
| Odisha   | 2005-2005          | Census                                 | SBH        |
| Odisha   | 2007-2008          | Census                                 | SBH        |
| Odisha   | 2009-2015          | Vital Registration                     | VR/SRS/DSP |
| Punjab   | 1968-2015          | Standard demographic and health survey | SBH        |
| Punjab   | 1970-2015          | Standard demographic and health survey | CBH        |
| Punjab   | 1974-2013          | Other survey                           | SBH        |
| Punjab   | 1981-1981          | Census                                 | SBH        |
| Punjab   | 1984-1984          | Census                                 | SBH        |
| Punjab   | 1985-2012          | Other survey                           | CBH        |
| Punjab   | 1988-1988          | Census                                 | SBH        |
| Punjab   | 1991-1992          | Census                                 | SBH        |
| Punjab   | 1994-1995          | Census                                 | SBH        |
| Punjab   | 1995-2016          | Sample Registrations System            | VR/SRS/DSP |
| Punjab   | 1998-1998          | Census                                 | SBH        |
| Punjab   | 2002-2002          | Census                                 | SBH        |
| Punjab   | 2005-2005          | Census                                 | SBH        |
| Punjab   | 2008-2008          | Census                                 | SBH        |
| Punjab   | 2009-2015          | Vital Registration                     | VR/SRS/DSP |

**Appendix Table 5. Under-5 mortality reference sources by source date and location, 1950-2017**

| Location   | Year range of data | Reference source                       | Data type  |
|------------|--------------------|----------------------------------------|------------|
| Rajasthan  | 1967-2015          | Standard demographic and health survey | CBH        |
| Rajasthan  | 1974-2013          | Other survey                           | SBH        |
| Rajasthan  | 1975-2015          | Standard demographic and health survey | SBH        |
| Rajasthan  | 1981-1981          | Census                                 | SBH        |
| Rajasthan  | 1983-2012          | Other survey                           | CBH        |
| Rajasthan  | 1985-1985          | Census                                 | SBH        |
| Rajasthan  | 1989-1989          | Census                                 | SBH        |
| Rajasthan  | 1991-1992          | Census                                 | SBH        |
| Rajasthan  | 1994-1995          | Census                                 | SBH        |
| Rajasthan  | 1995-2016          | Sample Registrations System            | VR/SRS/DSP |
| Rajasthan  | 1998-1999          | Census                                 | SBH        |
| Rajasthan  | 2002-2002          | Census                                 | SBH        |
| Rajasthan  | 2004-2005          | Census                                 | SBH        |
| Rajasthan  | 2008-2008          | Census                                 | SBH        |
| Rajasthan  | 2009-2012          | Vital Registration                     | VR/SRS/DSP |
| Rajasthan  | 2014-2015          | Vital Registration                     | VR/SRS/DSP |
| Sikkim     | 1974-2013          | Other survey                           | SBH        |
| Sikkim     | 1975-2014          | Standard demographic and health survey | SBH        |
| Sikkim     | 1981-1981          | Census                                 | SBH        |
| Sikkim     | 1983-2014          | Standard demographic and health survey | CBH        |
| Sikkim     | 1985-1985          | Census                                 | SBH        |
| Sikkim     | 1988-1988          | Census                                 | SBH        |
| Sikkim     | 1991-1992          | Census                                 | SBH        |
| Sikkim     | 1994-1999          | Census                                 | SBH        |
| Sikkim     | 2002-2002          | Census                                 | SBH        |
| Sikkim     | 2005-2005          | Census                                 | SBH        |
| Sikkim     | 2007-2008          | Census                                 | SBH        |
| Sikkim     | 2009-2013          | Vital Registration                     | VR/SRS/DSP |
| Tamil Nadu | 1966-2014          | Standard demographic and health survey | CBH        |
| Tamil Nadu | 1968-2013          | Standard demographic and health survey | SBH        |
| Tamil Nadu | 1974-2007          | Other survey                           | SBH        |
| Tamil Nadu | 1980-1980          | Census                                 | SBH        |
| Tamil Nadu | 1984-1984          | Census                                 | SBH        |
| Tamil Nadu | 1984-2012          | Other survey                           | CBH        |
| Tamil Nadu | 1988-1988          | Census                                 | SBH        |
| Tamil Nadu | 1990-1993          | Census                                 | SBH        |
| Tamil Nadu | 1995-1995          | Census                                 | SBH        |
| Tamil Nadu | 1995-2016          | Sample Registrations System            | VR/SRS/DSP |
| Tamil Nadu | 1998-1998          | Census                                 | SBH        |
| Tamil Nadu | 2001-2002          | Census                                 | SBH        |
| Tamil Nadu | 2005-2005          | Census                                 | SBH        |
| Tamil Nadu | 2007-2008          | Census                                 | SBH        |
| Tamil Nadu | 2009-2015          | Vital Registration                     | VR/SRS/DSP |
| Telangana  | 1979-2007          | Other survey                           | SBH        |
| Telangana  | 1985-2014          | Standard demographic and health survey | CBH        |
| Telangana  | 1989-2014          | Standard demographic and health survey | SBH        |
| Telangana  | 1990-2005          | Other survey                           | CBH        |
| Telangana  | 2013-2013          | Vital Registration                     | VR/SRS/DSP |

**Appendix Table 5. Under-5 mortality reference sources by source date and location, 1950-2017**

| Location      | Year range of data | Reference source                       | Data type  |
|---------------|--------------------|----------------------------------------|------------|
| Telangana     | 2014-2016          | Sample Registrations System            | VR/SRS/DSP |
| Telangana     | 2015-2015          | Vital Registration                     | VR/SRS/DSP |
| Tripura       | 1968-2014          | Standard demographic and health survey | SBH        |
| Tripura       | 1974-2013          | Other survey                           | SBH        |
| Tripura       | 1975-2014          | Standard demographic and health survey | CBH        |
| Tripura       | 1981-1981          | Census                                 | SBH        |
| Tripura       | 1985-1985          | Census                                 | SBH        |
| Tripura       | 1988-1988          | Census                                 | SBH        |
| Tripura       | 1991-1992          | Census                                 | SBH        |
| Tripura       | 1992-2005          | Other survey                           | CBH        |
| Tripura       | 1994-1995          | Census                                 | SBH        |
| Tripura       | 1998-1998          | Census                                 | SBH        |
| Tripura       | 2002-2002          | Census                                 | SBH        |
| Tripura       | 2005-2005          | Census                                 | SBH        |
| Tripura       | 2008-2008          | Census                                 | SBH        |
| Tripura       | 2012-2013          | Vital Registration                     | VR/SRS/DSP |
| Tripura       | 2015-2015          | Vital Registration                     | VR/SRS/DSP |
| Uttar Pradesh | 1963-2016          | Standard demographic and health survey | CBH        |
| Uttar Pradesh | 1968-2015          | Standard demographic and health survey | SBH        |
| Uttar Pradesh | 1974-2013          | Other survey                           | SBH        |
| Uttar Pradesh | 1981-1981          | Census                                 | SBH        |
| Uttar Pradesh | 1981-2012          | Other survey                           | CBH        |
| Uttar Pradesh | 1985-1985          | Census                                 | SBH        |
| Uttar Pradesh | 1989-1989          | Census                                 | SBH        |
| Uttar Pradesh | 1991-1992          | Census                                 | SBH        |
| Uttar Pradesh | 1995-1995          | Census                                 | SBH        |
| Uttar Pradesh | 1998-1999          | Census                                 | SBH        |
| Uttar Pradesh | 2000-2016          | Sample Registrations System            | VR/SRS/DSP |
| Uttar Pradesh | 2002-2002          | Census                                 | SBH        |
| Uttar Pradesh | 2005-2005          | Census                                 | SBH        |
| Uttar Pradesh | 2008-2008          | Census                                 | SBH        |
| Uttarakhand   | 1979-2013          | Other survey                           | SBH        |
| Uttarakhand   | 1981-1981          | Census                                 | SBH        |
| Uttarakhand   | 1981-2014          | Standard demographic and health survey | SBH        |
| Uttarakhand   | 1984-1984          | Census                                 | SBH        |
| Uttarakhand   | 1984-2014          | Standard demographic and health survey | CBH        |
| Uttarakhand   | 1988-1988          | Census                                 | SBH        |
| Uttarakhand   | 1989-2012          | Other survey                           | CBH        |
| Uttarakhand   | 1991-1992          | Census                                 | SBH        |
| Uttarakhand   | 1994-1995          | Census                                 | SBH        |
| Uttarakhand   | 1998-1998          | Census                                 | SBH        |
| Uttarakhand   | 2002-2002          | Census                                 | SBH        |
| Uttarakhand   | 2005-2005          | Census                                 | SBH        |
| Uttarakhand   | 2008-2008          | Census                                 | SBH        |
| Uttarakhand   | 2014-2016          | Sample Registrations System            | VR/SRS/DSP |
| West Bengal   | 1967-2014          | Standard demographic and health survey | CBH        |
| West Bengal   | 1968-2014          | Standard demographic and health survey | SBH        |
| West Bengal   | 1974-2013          | Other survey                           | SBH        |

**Appendix Table 5. Under-5 mortality reference sources by source date and location, 1950-2017**

| Location                           | Year range of data | Reference source                       | Data type  |
|------------------------------------|--------------------|----------------------------------------|------------|
| West Bengal                        | 1981-1981          | Census                                 | SBH        |
| West Bengal                        | 1983-2013          | Other survey                           | CBH        |
| West Bengal                        | 1984-1984          | Census                                 | SBH        |
| West Bengal                        | 1988-1988          | Census                                 | SBH        |
| West Bengal                        | 1990-1990          | Census                                 | SBH        |
| West Bengal                        | 1992-1992          | Census                                 | SBH        |
| West Bengal                        | 1994-1995          | Census                                 | SBH        |
| West Bengal                        | 1995-2016          | Sample Registrations System            | VR/SRS/DSP |
| West Bengal                        | 1997-1999          | Census                                 | SBH        |
| West Bengal                        | 2001-2002          | Census                                 | SBH        |
| West Bengal                        | 2005-2005          | Census                                 | SBH        |
| West Bengal                        | 2007-2007          | Census                                 | SBH        |
| West Bengal                        | 2013-2013          | Vital Registration                     | VR/SRS/DSP |
| Union Territories other than Delhi | 1980-1980          | Census                                 | SBH        |
| Union Territories other than Delhi | 1980-2013          | Other survey                           | SBH        |
| Union Territories other than Delhi | 1984-1984          | Census                                 | SBH        |
| Union Territories other than Delhi | 1988-1988          | Census                                 | SBH        |
| Union Territories other than Delhi | 1992-1992          | Census                                 | SBH        |
| Union Territories other than Delhi | 1992-1993          | Other survey                           | CBH        |
| Union Territories other than Delhi | 1995-1995          | Census                                 | SBH        |
| Union Territories other than Delhi | 1996-1997          | Other survey                           | CBH        |
| Union Territories other than Delhi | 1998-1998          | Census                                 | SBH        |
| Union Territories other than Delhi | 2002-2005          | Other survey                           | CBH        |
| Union Territories other than Delhi | 2009-2013          | Vital Registration                     | VR/SRS/DSP |
| Nepal                              | 1950-1950          | Census                                 | SBH        |
| Nepal                              | 1950-1975          | World Fertility Survey                 | CBH        |
| Nepal                              | 1951-1975          | World Fertility Survey                 | SBH        |
| Nepal                              | 1954-1954          | Census                                 | SBH        |
| Nepal                              | 1958-1958          | Census                                 | SBH        |
| Nepal                              | 1961-1962          | Census                                 | SBH        |
| Nepal                              | 1964-1965          | Census                                 | SBH        |
| Nepal                              | 1968-1968          | Census                                 | SBH        |
| Nepal                              | 1968-2015          | Standard demographic and health survey | CBH        |
| Nepal                              | 1969-1969          | Other survey                           | HH         |
| Nepal                              | 1971-2015          | Standard demographic and health survey | SBH        |
| Nepal                              | 1972-1972          | Census                                 | SBH        |
| Nepal                              | 1973-1973          | Other survey                           | SBH        |
| Nepal                              | 1974-1974          | Other survey                           | HH         |
| Nepal                              | 1975-1975          | Census                                 | SBH        |
| Nepal                              | 1976-1976          | Other survey                           | SBH        |
| Nepal                              | 1976-2000          | Census                                 | SBH        |
| Nepal                              | 1979-1979          | Other survey                           | HH         |
| Nepal                              | 1980-1980          | Other survey                           | SBH        |
| Nepal                              | 1982-1982          | Other survey                           | SBH        |
| Nepal                              | 1984-1984          | Other survey                           | HH         |
| Nepal                              | 1985-1985          | Other survey                           | SBH        |
| Nepal                              | 1986-2013          | Multiple Indicator Cluster Survey      | CBH        |
| Nepal                              | 1987-1987          | Other survey                           | SBH        |

**Appendix Table 5. Under-5 mortality reference sources by source date and location, 1950-2017**

| Location | Year range of data | Reference source                       | Data type  |
|----------|--------------------|----------------------------------------|------------|
| Nepal    | 1989-1989          | Other survey                           | HH         |
| Nepal    | 1989-2013          | Multiple Indicator Cluster Survey      | SBH        |
| Pakistan | 1950-1972          | Census                                 | SBH        |
| Pakistan | 1950-1975          | World Fertility Survey                 | CBH        |
| Pakistan | 1951-1975          | World Fertility Survey                 | SBH        |
| Pakistan | 1966-2004          | Standard demographic and health survey | SBH        |
| Pakistan | 1966-2004          | Living Standards Measurement Study     | SBH        |
| Pakistan | 1967-1967          | Other survey                           | SBH        |
| Pakistan | 1968-1968          | Sample Registrations System            | VR/SRS/DSP |
| Pakistan | 1969-2004          | Standard demographic and health survey | CBH        |
| Pakistan | 1971-1971          | Other survey                           | SBH        |
| Pakistan | 1971-2001          | Other survey                           | CBH        |
| Pakistan | 1974-1975          | Other survey                           | SBH        |
| Pakistan | 1975-1975          | Census                                 | SBH        |
| Pakistan | 1976-1979          | Sample Registrations System            | VR/SRS/DSP |
| Pakistan | 1977-1977          | Census                                 | SBH        |
| Pakistan | 1977-1977          | Other survey                           | SBH        |
| Pakistan | 1978-2004          | Living Standards Measurement Study     | CBH        |
| Pakistan | 1979-1979          | Other survey                           | SBH        |
| Pakistan | 1981-1982          | Other survey                           | SBH        |
| Pakistan | 1984-1993          | Sample Registrations System            | VR/SRS/DSP |
| Pakistan | 1985-1985          | Other survey                           | SBH        |
| Pakistan | 1987-1987          | Other survey                           | SBH        |
| Pakistan | 1990-1990          | Other survey                           | SBH        |
| Pakistan | 1994-1994          | Multiple Indicator Cluster Survey      | HH         |
| Pakistan | 1995-1997          | Sample Registrations System            | VR/SRS/DSP |
| Pakistan | 1999-1999          | Sample Registrations System            | VR/SRS/DSP |
| Pakistan | 1999-1999          | Multiple Indicator Cluster Survey      | HH         |
| Pakistan | 2001-2001          | Sample Registrations System            | VR/SRS/DSP |
| Pakistan | 2003-2003          | Sample Registrations System            | VR/SRS/DSP |
| Pakistan | 2004-2004          | Multiple Indicator Cluster Survey      | HH         |
| Pakistan | 2006-2007          | Sample Registrations System            | VR/SRS/DSP |
| Pakistan | 2006-2007          | Living Standards Measurement Study     | CBH        |
| Pakistan | 2006-2007          | Living Standards Measurement Study     | SBH        |
| Pakistan | 2006-2012          | Standard demographic and health survey | CBH        |
| Pakistan | 2006-2012          | Standard demographic and health survey | SBH        |
| Pakistan | 2009-2009          | Multiple Indicator Cluster Survey      | HH         |
| Pakistan | 2014-2014          | Multiple Indicator Cluster Survey      | HH         |
| China    | 1957-1999          | Census                                 | SBH        |
| China    | 1974-1974          | Other survey                           | HH         |
| China    | 1981-1981          | Census                                 | HH         |
| China    | 1986-1987          | Other survey                           | HH         |
| China    | 1989-1989          | Census                                 | HH         |
| China    | 1991-1991          | Other survey                           | HH         |
| China    | 1991-2002          | Disease surveillance points            | VR/SRS/DSP |
| China    | 1994-1994          | Other survey                           | HH         |
| China    | 1995-1995          | Census                                 | HH         |
| China    | 1996-2013          | Other survey                           | HH         |



**Appendix Table 5. Under-5 mortality reference sources by source date and location, 1950-2017**

| Location                       | Year range of data | Reference source            | Data type  |
|--------------------------------|--------------------|-----------------------------|------------|
| China                          | 2000-2000          | Census                      | HH         |
| China                          | 2002-2002          | Census                      | SBH        |
| China                          | 2004-2010          | Disease surveillance points | VR/SRS/DSP |
| China                          | 2005-2005          | Census                      | HH         |
| China                          | 2005-2005          | Census                      | SBH        |
| China                          | 2008-2008          | Census                      | SBH        |
| China                          | 2010-2010          | Census                      | HH         |
| China                          | 2012-2015          | Disease surveillance points | VR/SRS/DSP |
| Taiwan                         | 1955-2016          | Vital Registration          | VR/SRS/DSP |
| American Samoa                 | 1952-1956          | Vital Registration          | VR/SRS/DSP |
| American Samoa                 | 1955-1955          | Other survey                | SBH        |
| American Samoa                 | 1958-1973          | Vital Registration          | VR/SRS/DSP |
| American Samoa                 | 1959-1959          | Other survey                | SBH        |
| American Samoa                 | 1962-1962          | Other survey                | SBH        |
| American Samoa                 | 1966-1966          | Other survey                | SBH        |
| American Samoa                 | 1969-1969          | Other survey                | SBH        |
| American Samoa                 | 1972-1972          | Other survey                | SBH        |
| American Samoa                 | 1976-1976          | Vital Registration          | VR/SRS/DSP |
| American Samoa                 | 1982-1982          | Vital Registration          | VR/SRS/DSP |
| American Samoa                 | 1984-1993          | Vital Registration          | VR/SRS/DSP |
| American Samoa                 | 1997-2015          | Vital Registration          | VR/SRS/DSP |
| Federated States of Micronesia | 1956-1956          | Census                      | SBH        |
| Federated States of Micronesia | 1960-1960          | Census                      | SBH        |
| Federated States of Micronesia | 1963-1963          | Census                      | SBH        |
| Federated States of Micronesia | 1965-1965          | Census                      | SBH        |
| Federated States of Micronesia | 1967-1967          | Census                      | SBH        |
| Federated States of Micronesia | 1970-1970          | Census                      | SBH        |
| Federated States of Micronesia | 1976-1976          | Census                      | SBH        |
| Federated States of Micronesia | 1979-1979          | Census                      | SBH        |
| Federated States of Micronesia | 1982-1982          | Census                      | SBH        |
| Federated States of Micronesia | 1985-1985          | Census                      | SBH        |
| Federated States of Micronesia | 1988-1991          | Census                      | SBH        |
| Federated States of Micronesia | 1994-1994          | Census                      | SBH        |
| Federated States of Micronesia | 1996-1996          | Census                      | SBH        |
| Federated States of Micronesia | 2003-2003          | Vital Registration          | VR/SRS/DSP |
| Fiji                           | 1950-1950          | Census                      | SBH        |
| Fiji                           | 1950-1973          | World Fertility Survey      | CBH        |
| Fiji                           | 1950-1987          | Vital Registration          | VR/SRS/DSP |
| Fiji                           | 1952-1952          | Census                      | SBH        |
| Fiji                           | 1954-1971          | World Fertility Survey      | SBH        |
| Fiji                           | 1955-1955          | Census                      | SBH        |
| Fiji                           | 1958-1958          | Census                      | SBH        |
| Fiji                           | 1960-1962          | Census                      | SBH        |
| Fiji                           | 1964-1964          | Census                      | SBH        |
| Fiji                           | 1967-1967          | Census                      | SBH        |
| Fiji                           | 1970-1970          | Census                      | SBH        |
| Fiji                           | 1972-1972          | Census                      | SBH        |
| Fiji                           | 1974-1974          | Census                      | SBH        |

**Appendix Table 5. Under-5 mortality reference sources by source date and location, 1950-2017**

| Location         | Year range of data | Reference source                       | Data type  |
|------------------|--------------------|----------------------------------------|------------|
| Fiji             | 1976-1977          | Census                                 | SBH        |
| Fiji             | 1980-1980          | Census                                 | SBH        |
| Fiji             | 1982-1983          | Census                                 | SBH        |
| Fiji             | 1987-1988          | Census                                 | SBH        |
| Fiji             | 1990-1992          | Census                                 | SBH        |
| Fiji             | 1995-1995          | Census                                 | SBH        |
| Fiji             | 1996-2009          | Vital Registration                     | VR/SRS/DSP |
| Fiji             | 1998-1998          | Census                                 | SBH        |
| Fiji             | 2001-2001          | Census                                 | SBH        |
| Fiji             | 2004-2004          | Census                                 | SBH        |
| Fiji             | 2011-2012          | Vital Registration                     | VR/SRS/DSP |
| Guam             | 1950-1992          | Vital Registration                     | VR/SRS/DSP |
| Guam             | 1994-2015          | Vital Registration                     | VR/SRS/DSP |
| Kiribati         | 1952-1952          | Census                                 | SBH        |
| Kiribati         | 1955-1955          | Census                                 | SBH        |
| Kiribati         | 1957-1960          | Census                                 | SBH        |
| Kiribati         | 1962-1964          | Census                                 | SBH        |
| Kiribati         | 1967-1967          | Census                                 | SBH        |
| Kiribati         | 1969-1969          | Census                                 | SBH        |
| Kiribati         | 1972-1972          | Census                                 | SBH        |
| Kiribati         | 1974-1974          | Census                                 | SBH        |
| Kiribati         | 1987-1987          | Census                                 | SBH        |
| Kiribati         | 1989-1990          | Census                                 | SBH        |
| Kiribati         | 1991-1991          | Other survey                           | SBH        |
| Kiribati         | 1991-2001          | Vital Registration                     | VR/SRS/DSP |
| Kiribati         | 1992-1992          | Census                                 | SBH        |
| Kiribati         | 1994-1994          | Other survey                           | SBH        |
| Kiribati         | 1994-1995          | Census                                 | SBH        |
| Kiribati         | 1996-1996          | Other survey                           | HH         |
| Kiribati         | 1997-1997          | Other survey                           | SBH        |
| Kiribati         | 1997-1998          | Census                                 | SBH        |
| Kiribati         | 2000-2002          | Census                                 | SBH        |
| Kiribati         | 2001-2001          | Other survey                           | HH         |
| Kiribati         | 2001-2001          | Other survey                           | SBH        |
| Kiribati         | 2004-2004          | Census                                 | SBH        |
| Kiribati         | 2004-2004          | Other survey                           | SBH        |
| Kiribati         | 2006-2006          | Other survey                           | HH         |
| Kiribati         | 2006-2006          | Other survey                           | SBH        |
| Kiribati         | 2011-2011          | Vital Registration                     | VR/SRS/DSP |
| Marshall Islands | 1981-1981          | Census                                 | SBH        |
| Marshall Islands | 1984-1984          | Census                                 | SBH        |
| Marshall Islands | 1986-1997          | Vital Registration                     | VR/SRS/DSP |
| Marshall Islands | 1987-1987          | Census                                 | SBH        |
| Marshall Islands | 1990-1992          | Census                                 | SBH        |
| Marshall Islands | 1995-1995          | Census                                 | SBH        |
| Marshall Islands | 1995-1995          | Standard demographic and health survey | HH         |
| Marshall Islands | 1999-1999          | Census                                 | SBH        |
| Marshall Islands | 2000-2000          | Standard demographic and health survey | HH         |

**Appendix Table 5. Under-5 mortality reference sources by source date and location, 1950-2017**

| Location                 | Year range of data | Reference source                       | Data type  |
|--------------------------|--------------------|----------------------------------------|------------|
| Marshall Islands         | 2002-2002          | Census                                 | SBH        |
| Marshall Islands         | 2005-2005          | Census                                 | SBH        |
| Marshall Islands         | 2005-2005          | Standard demographic and health survey | HH         |
| Marshall Islands         | 2005-2006          | Vital Registration                     | VR/SRS/DSP |
| Marshall Islands         | 2008-2008          | Census                                 | SBH        |
| Northern Mariana Islands | 1998-2015          | Vital Registration                     | VR/SRS/DSP |
| Papua New Guinea         | 1952-1952          | Census                                 | SBH        |
| Papua New Guinea         | 1956-1956          | Census                                 | SBH        |
| Papua New Guinea         | 1959-1959          | Census                                 | SBH        |
| Papua New Guinea         | 1962-1962          | Census                                 | SBH        |
| Papua New Guinea         | 1965-1965          | Census                                 | SBH        |
| Papua New Guinea         | 1967-1968          | Census                                 | SBH        |
| Papua New Guinea         | 1971-1971          | Census                                 | SBH        |
| Papua New Guinea         | 1972-1972          | Other demographic and health survey    | SBH        |
| Papua New Guinea         | 1974-1974          | Census                                 | SBH        |
| Papua New Guinea         | 1974-1974          | Other demographic and health survey    | HH         |
| Papua New Guinea         | 1976-1976          | Census                                 | SBH        |
| Papua New Guinea         | 1976-1976          | Other demographic and health survey    | SBH        |
| Papua New Guinea         | 1977-1977          | Vital Registration                     | VR/SRS/DSP |
| Papua New Guinea         | 1979-1979          | Other demographic and health survey    | HH         |
| Papua New Guinea         | 1979-1979          | Other demographic and health survey    | SBH        |
| Papua New Guinea         | 1979-2006          | Standard demographic and health survey | CBH        |
| Papua New Guinea         | 1980-1980          | Vital Registration                     | VR/SRS/DSP |
| Papua New Guinea         | 1981-1981          | Census                                 | SBH        |
| Papua New Guinea         | 1982-1982          | Other demographic and health survey    | SBH        |
| Papua New Guinea         | 1984-1984          | Census                                 | SBH        |
| Papua New Guinea         | 1984-1984          | Standard demographic and health survey | HH         |
| Papua New Guinea         | 1984-1984          | Other demographic and health survey    | HH         |
| Papua New Guinea         | 1985-1985          | Other demographic and health survey    | SBH        |
| Papua New Guinea         | 1986-1986          | Standard demographic and health survey | SBH        |
| Papua New Guinea         | 1987-1988          | Other demographic and health survey    | SBH        |
| Papua New Guinea         | 1988-1988          | Census                                 | SBH        |
| Papua New Guinea         | 1989-1989          | Standard demographic and health survey | HH         |
| Papua New Guinea         | 1989-1989          | Standard demographic and health survey | SBH        |
| Papua New Guinea         | 1989-1989          | Other demographic and health survey    | HH         |
| Papua New Guinea         | 1992-1992          | Standard demographic and health survey | SBH        |
| Papua New Guinea         | 1993-1993          | Census                                 | SBH        |
| Papua New Guinea         | 1993-1993          | Other demographic and health survey    | SBH        |
| Papua New Guinea         | 1994-1994          | Standard demographic and health survey | HH         |
| Papua New Guinea         | 1994-1994          | Other demographic and health survey    | HH         |
| Papua New Guinea         | 1995-1995          | Standard demographic and health survey | SBH        |
| Papua New Guinea         | 1996-1996          | Census                                 | SBH        |
| Papua New Guinea         | 1998-1998          | Standard demographic and health survey | SBH        |
| Papua New Guinea         | 1999-1999          | Standard demographic and health survey | HH         |
| Papua New Guinea         | 2001-2001          | Standard demographic and health survey | SBH        |
| Papua New Guinea         | 2003-2003          | Standard demographic and health survey | SBH        |
| Papua New Guinea         | 2004-2004          | Standard demographic and health survey | HH         |
| Samoa                    | 1950-1950          | Census                                 | SBH        |

**Appendix Table 5. Under-5 mortality reference sources by source date and location, 1950-2017**

| Location        | Year range of data | Reference source                       | Data type  |
|-----------------|--------------------|----------------------------------------|------------|
| Samoa           | 1952-1953          | Census                                 | SBH        |
| Samoa           | 1955-1958          | Census                                 | SBH        |
| Samoa           | 1955-1969          | Vital Registration                     | VR/SRS/DSP |
| Samoa           | 1960-1960          | Census                                 | SBH        |
| Samoa           | 1962-1963          | Census                                 | SBH        |
| Samoa           | 1965-1965          | Census                                 | SBH        |
| Samoa           | 1967-1968          | Census                                 | SBH        |
| Samoa           | 1970-1970          | Census                                 | SBH        |
| Samoa           | 1972-1972          | Census                                 | SBH        |
| Samoa           | 1973-1976          | Vital Registration                     | VR/SRS/DSP |
| Samoa           | 1975-1975          | Census                                 | SBH        |
| Samoa           | 1977-1977          | Census                                 | SBH        |
| Samoa           | 1978-1978          | Vital Registration                     | VR/SRS/DSP |
| Samoa           | 1980-1980          | Vital Registration                     | VR/SRS/DSP |
| Samoa           | 1998-1998          | Other survey                           | HH         |
| Samoa           | 2002-2002          | Standard demographic and health survey | HH         |
| Samoa           | 2002-2002          | Other survey                           | HH         |
| Samoa           | 2007-2007          | Standard demographic and health survey | HH         |
| Samoa           | 2007-2007          | Other survey                           | HH         |
| Samoa           | 2012-2012          | Standard demographic and health survey | HH         |
| Solomon Islands | 1952-1952          | Census                                 | SBH        |
| Solomon Islands | 1955-1955          | Census                                 | SBH        |
| Solomon Islands | 1958-1959          | Census                                 | SBH        |
| Solomon Islands | 1961-1961          | Census                                 | SBH        |
| Solomon Islands | 1964-1964          | Census                                 | SBH        |
| Solomon Islands | 1966-1967          | Census                                 | SBH        |
| Solomon Islands | 1969-1969          | Census                                 | SBH        |
| Solomon Islands | 1972-1972          | Census                                 | SBH        |
| Solomon Islands | 1981-1981          | Census                                 | SBH        |
| Solomon Islands | 1984-1984          | Census                                 | SBH        |
| Solomon Islands | 1987-1987          | Census                                 | SBH        |
| Solomon Islands | 1990-1990          | Census                                 | SBH        |
| Solomon Islands | 1993-1995          | Census                                 | SBH        |
| Solomon Islands | 1995-1995          | Standard demographic and health survey | HH         |
| Solomon Islands | 1997-1997          | Census                                 | SBH        |
| Solomon Islands | 2000-2000          | Census                                 | SBH        |
| Solomon Islands | 2000-2000          | Standard demographic and health survey | HH         |
| Solomon Islands | 2003-2003          | Census                                 | SBH        |
| Solomon Islands | 2003-2003          | Standard demographic and health survey | HH         |
| Solomon Islands | 2005-2005          | Census                                 | SBH        |
| Solomon Islands | 2005-2005          | Standard demographic and health survey | HH         |
| Solomon Islands | 2008-2008          | Standard demographic and health survey | HH         |
| Solomon Islands | 2013-2013          | Standard demographic and health survey | HH         |
| Tonga           | 1958-1958          | Census                                 | SBH        |
| Tonga           | 1958-1964          | Vital Registration                     | VR/SRS/DSP |
| Tonga           | 1961-1961          | Census                                 | SBH        |
| Tonga           | 1964-1964          | Census                                 | SBH        |
| Tonga           | 1966-1966          | Vital Registration                     | VR/SRS/DSP |

**Appendix Table 5. Under-5 mortality reference sources by source date and location, 1950-2017**

| Location | Year range of data | Reference source                       | Data type  |
|----------|--------------------|----------------------------------------|------------|
| Tonga    | 1967-1968          | Census                                 | SBH        |
| Tonga    | 1970-1971          | Census                                 | SBH        |
| Tonga    | 1973-1974          | Census                                 | SBH        |
| Tonga    | 1977-1977          | Census                                 | SBH        |
| Tonga    | 1980-1980          | Census                                 | SBH        |
| Tonga    | 1982-1982          | Vital Registration                     | VR/SRS/DSP |
| Tonga    | 1982-1982          | Census                                 | SBH        |
| Tonga    | 1992-1992          | Other demographic and health survey    | SBH        |
| Tonga    | 1996-1996          | Other demographic and health survey    | SBH        |
| Tonga    | 2000-2000          | Other demographic and health survey    | HH         |
| Tonga    | 2000-2000          | Other demographic and health survey    | SBH        |
| Tonga    | 2003-2003          | Other demographic and health survey    | SBH        |
| Tonga    | 2003-2004          | Vital Registration                     | VR/SRS/DSP |
| Tonga    | 2005-2005          | Other demographic and health survey    | HH         |
| Tonga    | 2006-2006          | Census                                 | HH         |
| Tonga    | 2006-2006          | Other demographic and health survey    | SBH        |
| Tonga    | 2008-2008          | Other demographic and health survey    | SBH        |
| Tonga    | 2010-2010          | Other demographic and health survey    | HH         |
| Vanuatu  | 1952-1952          | Census                                 | SBH        |
| Vanuatu  | 1956-1956          | Census                                 | SBH        |
| Vanuatu  | 1959-1959          | Census                                 | SBH        |
| Vanuatu  | 1961-1961          | Census                                 | SBH        |
| Vanuatu  | 1963-1963          | Census                                 | SBH        |
| Vanuatu  | 1985-2005          | Multiple Indicator Cluster Survey      | SBH        |
| Vanuatu  | 1991-1991          | Census                                 | SBH        |
| Vanuatu  | 1994-1994          | Census                                 | SBH        |
| Vanuatu  | 1994-1994          | Other demographic and health survey    | SBH        |
| Vanuatu  | 1997-1997          | Other demographic and health survey    | SBH        |
| Vanuatu  | 1998-1998          | Census                                 | SBH        |
| Vanuatu  | 2001-2001          | Census                                 | SBH        |
| Vanuatu  | 2001-2001          | Other demographic and health survey    | HH         |
| Vanuatu  | 2001-2001          | Other demographic and health survey    | SBH        |
| Vanuatu  | 2003-2003          | Census                                 | SBH        |
| Vanuatu  | 2004-2004          | Other demographic and health survey    | SBH        |
| Vanuatu  | 2006-2006          | Census                                 | SBH        |
| Vanuatu  | 2006-2006          | Other demographic and health survey    | HH         |
| Vanuatu  | 2006-2006          | Other demographic and health survey    | SBH        |
| Vanuatu  | 2009-2009          | Other demographic and health survey    | SBH        |
| Vanuatu  | 2011-2011          | Other demographic and health survey    | HH         |
| Cambodia | 1972-1974          | Standard demographic and health survey | CBH        |
| Cambodia | 1972-1974          | Other demographic and health survey    | CBH        |
| Cambodia | 1973-1974          | Census                                 | SBH        |
| Cambodia | 1973-1974          | Other demographic and health survey    | SBH        |
| Cambodia | 1973-1974          | Other survey                           | SBH        |
| Cambodia | 1979-2003          | Other survey                           | SBH        |
| Cambodia | 1981-1997          | Other demographic and health survey    | CBH        |
| Cambodia | 1981-1997          | Other demographic and health survey    | SBH        |
| Cambodia | 1981-2007          | Census                                 | SBH        |

**Appendix Table 5. Under-5 mortality reference sources by source date and location, 1950-2017**

| Location  | Year range of data | Reference source                         | Data type  |
|-----------|--------------------|------------------------------------------|------------|
| Cambodia  | 1981-2014          | Standard demographic and health survey   | CBH        |
| Cambodia  | 1981-2014          | Standard demographic and health survey   | SBH        |
| Indonesia | 1950-1975          | World Fertility Survey                   | CBH        |
| Indonesia | 1950-2000          | Census                                   | CBH        |
| Indonesia | 1950-2007          | Other survey                             | CBH        |
| Indonesia | 1950-2009          | Census                                   | SBH        |
| Indonesia | 1951-1975          | World Fertility Survey                   | SBH        |
| Indonesia | 1958-2012          | Standard demographic and health survey   | CBH        |
| Indonesia | 1960-1994          | Intercensal Population Survey (SUPAS)    | SBH        |
| Indonesia | 1963-2011          | Standard demographic and health survey   | SBH        |
| Indonesia | 1968-2013          | National Socio-Economic Survey (SUSENAS) | SBH        |
| Indonesia | 1969-2007          | Other survey                             | SBH        |
| Indonesia | 2010-2010          | Census                                   | HH         |
| Laos      | 1976-1976          | Census                                   | SBH        |
| Laos      | 1980-1980          | Census                                   | SBH        |
| Laos      | 1982-2011          | Multiple Indicator Cluster Survey        | CBH        |
| Laos      | 1983-1983          | Census                                   | SBH        |
| Laos      | 1985-1985          | Reproductive Health Survey               | SBH        |
| Laos      | 1986-1986          | Census                                   | SBH        |
| Laos      | 1987-2011          | Multiple Indicator Cluster Survey        | SBH        |
| Laos      | 1989-1989          | Census                                   | SBH        |
| Laos      | 1989-1989          | Reproductive Health Survey               | SBH        |
| Laos      | 1991-1991          | Census                                   | SBH        |
| Laos      | 1993-1993          | Reproductive Health Survey               | SBH        |
| Laos      | 1996-1996          | Reproductive Health Survey               | SBH        |
| Laos      | 1999-1999          | Reproductive Health Survey               | SBH        |
| Laos      | 2002-2002          | Reproductive Health Survey               | HH         |
| Laos      | 2002-2002          | Reproductive Health Survey               | SBH        |
| Malaysia  | 1950-1974          | World Fertility Survey                   | CBH        |
| Malaysia  | 1950-1974          | World Fertility Survey                   | SBH        |
| Malaysia  | 1950-1979          | Census                                   | SBH        |
| Malaysia  | 1952-1972          | Vital Registration                       | VR/SRS/DSP |
| Malaysia  | 1976-1978          | Vital Registration                       | VR/SRS/DSP |
| Malaysia  | 1984-1986          | Vital Registration                       | VR/SRS/DSP |
| Malaysia  | 1990-2015          | Vital Registration                       | VR/SRS/DSP |
| Maldives  | 1959-1959          | Census                                   | SBH        |
| Maldives  | 1963-1963          | Census                                   | SBH        |
| Maldives  | 1966-1966          | Census                                   | SBH        |
| Maldives  | 1968-1969          | Census                                   | SBH        |
| Maldives  | 1971-1971          | Census                                   | SBH        |
| Maldives  | 1973-1974          | Census                                   | SBH        |
| Maldives  | 1974-1974          | Vital Registration                       | VR/SRS/DSP |
| Maldives  | 1976-1979          | Census                                   | SBH        |
| Maldives  | 1978-2014          | Vital Registration                       | VR/SRS/DSP |
| Maldives  | 1980-2009          | Standard demographic and health survey   | CBH        |
| Maldives  | 1981-1981          | Census                                   | SBH        |
| Maldives  | 1982-1982          | Other survey                             | SBH        |

**Appendix Table 5. Under-5 mortality reference sources by source date and location, 1950-2017**

| Location    | Year range of data | Reference source                       | Data type  |
|-------------|--------------------|----------------------------------------|------------|
| Maldives    | 1983-1983          | Census                                 | SBH        |
| Maldives    | 1984-2008          | Standard demographic and health survey | SBH        |
| Maldives    | 1985-1985          | Other survey                           | SBH        |
| Maldives    | 1986-1986          | Census                                 | SBH        |
| Maldives    | 1987-1987          | Other survey                           | SBH        |
| Maldives    | 1989-1989          | Census                                 | SBH        |
| Maldives    | 1990-1990          | Other survey                           | SBH        |
| Maldives    | 1991-1991          | Census                                 | SBH        |
| Maldives    | 1992-1992          | Other survey                           | SBH        |
| Maldives    | 1994-1994          | Census                                 | SBH        |
| Maldives    | 1994-1994          | Other survey                           | SBH        |
| Maldives    | 1996-1996          | Census                                 | SBH        |
| Mauritius   | 1950-2016          | Vital Registration                     | VR/SRS/DSP |
| Myanmar     | 1964-1964          | Census                                 | SBH        |
| Myanmar     | 1968-1968          | Census                                 | SBH        |
| Myanmar     | 1971-1971          | Census                                 | SBH        |
| Myanmar     | 1974-1974          | Census                                 | SBH        |
| Myanmar     | 1977-1977          | Census                                 | SBH        |
| Myanmar     | 1979-1979          | Census                                 | SBH        |
| Myanmar     | 1979-1979          | Reproductive Health Survey             | SBH        |
| Myanmar     | 1982-1982          | Reproductive Health Survey             | SBH        |
| Myanmar     | 1985-1986          | Reproductive Health Survey             | SBH        |
| Myanmar     | 1988-1989          | Reproductive Health Survey             | SBH        |
| Myanmar     | 1988-2015          | Standard demographic and health survey | CBH        |
| Myanmar     | 1991-1992          | Reproductive Health Survey             | SBH        |
| Myanmar     | 1991-2015          | Standard demographic and health survey | SBH        |
| Myanmar     | 1994-1994          | Census                                 | SBH        |
| Myanmar     | 1994-1996          | Reproductive Health Survey             | SBH        |
| Myanmar     | 1997-1997          | Census                                 | SBH        |
| Myanmar     | 1998-1998          | Reproductive Health Survey             | SBH        |
| Myanmar     | 2001-2001          | Census                                 | SBH        |
| Myanmar     | 2002-2002          | Reproductive Health Survey             | SBH        |
| Myanmar     | 2004-2004          | Reproductive Health Survey             | SBH        |
| Myanmar     | 2005-2005          | Census                                 | SBH        |
| Myanmar     | 2008-2008          | Census                                 | SBH        |
| Myanmar     | 2009-2009          | Multiple Indicator Cluster Survey      | HH         |
| Myanmar     | 2011-2011          | Census                                 | SBH        |
| Myanmar     | 2013-2013          | Vital Registration                     | VR/SRS/DSP |
| Philippines | 1950-1952          | Census                                 | SBH        |
| Philippines | 1950-1953          | Vital Registration                     | VR/SRS/DSP |
| Philippines | 1950-1977          | World Fertility Survey                 | CBH        |
| Philippines | 1953-1977          | World Fertility Survey                 | SBH        |
| Philippines | 1954-1955          | Census                                 | SBH        |
| Philippines | 1956-2015          | Vital Registration                     | VR/SRS/DSP |
| Philippines | 1958-1958          | Census                                 | SBH        |
| Philippines | 1961-1961          | Census                                 | SBH        |
| Philippines | 1964-1964          | Census                                 | SBH        |
| Philippines | 1965-1989          | Census                                 | SBH        |

**Appendix Table 5. Under-5 mortality reference sources by source date and location, 1950-2017**

| Location    | Year range of data | Reference source                       | Data type  |
|-------------|--------------------|----------------------------------------|------------|
| Philippines | 1965-2013          | Standard demographic and health survey | CBH        |
| Philippines | 1968-2013          | Standard demographic and health survey | SBH        |
| Philippines | 1987-2011          | Other demographic and health survey    | SBH        |
| Sri Lanka   | 1950-1975          | World Fertility Survey                 | CBH        |
| Sri Lanka   | 1950-1989          | Vital Registration                     | VR/SRS/DSP |
| Sri Lanka   | 1951-1975          | World Fertility Survey                 | SBH        |
| Sri Lanka   | 1956-1956          | Census                                 | SBH        |
| Sri Lanka   | 1959-1959          | Census                                 | SBH        |
| Sri Lanka   | 1959-1986          | Standard demographic and health survey | CBH        |
| Sri Lanka   | 1962-1962          | Census                                 | SBH        |
| Sri Lanka   | 1962-1986          | Standard demographic and health survey | SBH        |
| Sri Lanka   | 1965-1965          | Census                                 | SBH        |
| Sri Lanka   | 1967-1967          | Census                                 | SBH        |
| Sri Lanka   | 1973-1973          | Other demographic and health survey    | SBH        |
| Sri Lanka   | 1976-1976          | Other demographic and health survey    | SBH        |
| Sri Lanka   | 1980-1980          | Other demographic and health survey    | SBH        |
| Sri Lanka   | 1981-1981          | Census                                 | SBH        |
| Sri Lanka   | 1981-1981          | Other demographic and health survey    | HH         |
| Sri Lanka   | 1984-1984          | Other demographic and health survey    | SBH        |
| Sri Lanka   | 1985-1985          | Census                                 | SBH        |
| Sri Lanka   | 1986-1986          | Other demographic and health survey    | HH         |
| Sri Lanka   | 1987-1987          | Standard demographic and health survey | HH         |
| Sri Lanka   | 1987-1987          | Other demographic and health survey    | SBH        |
| Sri Lanka   | 1988-1988          | Census                                 | SBH        |
| Sri Lanka   | 1989-1989          | Other demographic and health survey    | SBH        |
| Sri Lanka   | 1991-1991          | Other demographic and health survey    | HH         |
| Sri Lanka   | 1991-1995          | Vital Registration                     | VR/SRS/DSP |
| Sri Lanka   | 1992-1992          | Census                                 | SBH        |
| Sri Lanka   | 1992-1992          | Standard demographic and health survey | HH         |
| Sri Lanka   | 1995-1995          | Census                                 | SBH        |
| Sri Lanka   | 1995-1995          | Standard demographic and health survey | HH         |
| Sri Lanka   | 1997-1997          | Standard demographic and health survey | HH         |
| Sri Lanka   | 1997-2008          | Vital Registration                     | VR/SRS/DSP |
| Sri Lanka   | 1998-1998          | Census                                 | SBH        |
| Sri Lanka   | 1999-1999          | Standard demographic and health survey | HH         |
| Sri Lanka   | 2003-2004          | Standard demographic and health survey | HH         |
| Sri Lanka   | 2009-2009          | Standard demographic and health survey | HH         |
| Sri Lanka   | 2010-2010          | Vital Registration                     | VR/SRS/DSP |
| Sri Lanka   | 2013-2013          | Vital Registration                     | VR/SRS/DSP |
| Sri Lanka   | 2014-2014          | Standard demographic and health survey | HH         |
| Seychelles  | 1951-1952          | Census                                 | SBH        |
| Seychelles  | 1952-1957          | Vital Registration                     | VR/SRS/DSP |
| Seychelles  | 1954-1954          | Census                                 | SBH        |
| Seychelles  | 1956-1956          | Census                                 | SBH        |
| Seychelles  | 1959-1959          | Vital Registration                     | VR/SRS/DSP |
| Seychelles  | 1959-1959          | Census                                 | SBH        |
| Seychelles  | 1961-1996          | Vital Registration                     | VR/SRS/DSP |
| Seychelles  | 1962-1962          | Census                                 | SBH        |



**Appendix Table 5. Under-5 mortality reference sources by source date and location, 1950-2017**

| Location                 | Year range of data | Reference source                       | Data type  |
|--------------------------|--------------------|----------------------------------------|------------|
| Seychelles               | 1965-1965          | Census                                 | SBH        |
| Seychelles               | 1967-1967          | Census                                 | SBH        |
| Seychelles               | 1998-2016          | Vital Registration                     | VR/SRS/DSP |
| Thailand                 | 1950-1974          | World Fertility Survey                 | SBH        |
| Thailand                 | 1950-1975          | World Fertility Survey                 | CBH        |
| Thailand                 | 1950-1999          | Census                                 | SBH        |
| Thailand                 | 1950-2000          | Vital Registration                     | VR/SRS/DSP |
| Thailand                 | 1956-1983          | Other survey                           | SBH        |
| Thailand                 | 1959-1986          | Standard demographic and health survey | CBH        |
| Thailand                 | 1962-1986          | Standard demographic and health survey | SBH        |
| Thailand                 | 1981-2012          | Multiple Indicator Cluster Survey      | SBH        |
| Thailand                 | 2002-2016          | Vital Registration                     | VR/SRS/DSP |
| Timor-Leste              | 1967-2016          | Standard demographic and health survey | SBH        |
| Timor-Leste              | 1975-2016          | Standard demographic and health survey | CBH        |
| Timor-Leste              | 1976-2000          | Living Standards Measurement Study     | SBH        |
| Timor-Leste              | 1982-2003          | Other survey                           | CBH        |
| Timor-Leste              | 1985-1985          | Census                                 | SBH        |
| Timor-Leste              | 1989-1989          | Census                                 | SBH        |
| Timor-Leste              | 1993-1993          | Census                                 | SBH        |
| Timor-Leste              | 1996-1996          | Census                                 | SBH        |
| Timor-Leste              | 1998-1998          | Census                                 | SBH        |
| Timor-Leste              | 2000-2000          | Census                                 | SBH        |
| Vietnam                  | 1964-2008          | Census                                 | SBH        |
| Vietnam                  | 1969-1995          | Other survey                           | SBH        |
| Vietnam                  | 1973-2002          | Standard demographic and health survey | SBH        |
| Vietnam                  | 1974-2002          | Standard demographic and health survey | CBH        |
| Vietnam                  | 1975-2013          | Multiple Indicator Cluster Survey      | SBH        |
| Vietnam                  | 1981-2005          | AIDS Indicator Survey                  | SBH        |
| Vietnam                  | 1988-2013          | Multiple Indicator Cluster Survey      | CBH        |
| Vietnam                  | 1997-2005          | Other survey                           | SBH        |
| Vietnam                  | 2007-2007          | Other survey                           | SBH        |
| Vietnam                  | 2009-2009          | Other survey                           | SBH        |
| Angola                   | 1976-2000          | Multiple Indicator Cluster Survey      | SBH        |
| Angola                   | 1982-2010          | Malaria Indicator Survey               | SBH        |
| Angola                   | 1985-2010          | Malaria Indicator Survey               | CBH        |
| Angola                   | 1988-2015          | Standard demographic and health survey | CBH        |
| Angola                   | 1991-2015          | Standard demographic and health survey | SBH        |
| Central African Republic | 1956-1956          | Census                                 | SBH        |
| Central African Republic | 1959-1959          | Census                                 | SBH        |
| Central African Republic | 1962-1962          | Census                                 | SBH        |
| Central African Republic | 1965-1965          | Census                                 | SBH        |
| Central African Republic | 1967-1994          | Standard demographic and health survey | CBH        |
| Central African Republic | 1968-1968          | Census                                 | SBH        |
| Central African Republic | 1970-1970          | Census                                 | SBH        |
| Central African Republic | 1970-1994          | Standard demographic and health survey | SBH        |
| Central African Republic | 1976-2010          | Multiple Indicator Cluster Survey      | SBH        |
| Congo                    | 1955-1955          | Census                                 | SBH        |
| Congo                    | 1958-1958          | Census                                 | SBH        |

**Appendix Table 5. Under-5 mortality reference sources by source date and location, 1950-2017**

| Location                         | Year range of data | Reference source                       | Data type |
|----------------------------------|--------------------|----------------------------------------|-----------|
| Congo                            | 1962-1962          | Census                                 | SBH       |
| Congo                            | 1965-1965          | Census                                 | SBH       |
| Congo                            | 1967-1967          | Census                                 | SBH       |
| Congo                            | 1970-1970          | Census                                 | SBH       |
| Congo                            | 1978-2011          | Standard demographic and health survey | CBH       |
| Congo                            | 1981-1996          | Standard demographic and health survey | SBH       |
| Congo                            | 1984-1996          | AIDS Indicator Survey                  | SBH       |
| Congo                            | 2000-2008          | AIDS Indicator Survey                  | SBH       |
| Congo                            | 2000-2011          | Standard demographic and health survey | SBH       |
| Congo                            | 2001-2002          | Multiple Indicator Cluster Survey      | HH        |
| Congo                            | 2006-2007          | Multiple Indicator Cluster Survey      | HH        |
| Congo                            | 2011-2012          | Multiple Indicator Cluster Survey      | HH        |
| Democratic Republic of the Congo | 1970-2009          | Multiple Indicator Cluster Survey      | SBH       |
| Democratic Republic of the Congo | 1980-2013          | Standard demographic and health survey | CBH       |
| Democratic Republic of the Congo | 1982-2013          | Standard demographic and health survey | SBH       |
| Equatorial Guinea                | 1976-2000          | Multiple Indicator Cluster Survey      | SBH       |
| Equatorial Guinea                | 2000-2000          | Standard demographic and health survey | HH        |
| Equatorial Guinea                | 2005-2005          | Standard demographic and health survey | HH        |
| Equatorial Guinea                | 2008-2008          | Standard demographic and health survey | HH        |
| Gabon                            | 1973-2011          | Standard demographic and health survey | CBH       |
| Gabon                            | 1976-2011          | Standard demographic and health survey | SBH       |
| Burundi                          | 1953-1953          | Other survey                           | SBH       |
| Burundi                          | 1957-1957          | Other survey                           | SBH       |
| Burundi                          | 1960-1960          | Other survey                           | SBH       |
| Burundi                          | 1962-2016          | Standard demographic and health survey | SBH       |
| Burundi                          | 1963-1963          | Other survey                           | SBH       |
| Burundi                          | 1964-2016          | Standard demographic and health survey | CBH       |
| Burundi                          | 1966-1966          | Other survey                           | SBH       |
| Burundi                          | 1968-1968          | Other survey                           | SBH       |
| Burundi                          | 1972-1972          | Census                                 | SBH       |
| Burundi                          | 1974-1998          | Other survey                           | SBH       |
| Burundi                          | 1975-2005          | Multiple Indicator Cluster Survey      | SBH       |
| Burundi                          | 1976-1976          | Census                                 | SBH       |
| Burundi                          | 1979-1979          | Census                                 | SBH       |
| Burundi                          | 1982-1982          | Census                                 | SBH       |
| Burundi                          | 1985-1985          | Census                                 | SBH       |
| Burundi                          | 1987-1987          | Census                                 | SBH       |
| Burundi                          | 1987-2011          | Malaria Indicator Survey               | SBH       |
| Comoros                          | 1961-1961          | Census                                 | SBH       |
| Comoros                          | 1964-1964          | Census                                 | SBH       |
| Comoros                          | 1968-1968          | Census                                 | SBH       |
| Comoros                          | 1971-1971          | Census                                 | SBH       |
| Comoros                          | 1971-2012          | Standard demographic and health survey | SBH       |
| Comoros                          | 1973-1973          | Census                                 | SBH       |
| Comoros                          | 1974-2012          | Standard demographic and health survey | CBH       |
| Comoros                          | 1976-1976          | Census                                 | SBH       |
| Comoros                          | 1976-2000          | Multiple Indicator Cluster Survey      | SBH       |
| Djibouti                         | 1972-1972          | Other survey                           | SBH       |

**Appendix Table 5. Under-5 mortality reference sources by source date and location, 1950-2017**

| Location | Year range of data | Reference source                                    | Data type |
|----------|--------------------|-----------------------------------------------------|-----------|
| Djibouti | 1975-1975          | Other survey                                        | SBH       |
| Djibouti | 1977-2001          | Pan Arab Project for Family Health                  | SBH       |
| Djibouti | 1979-1979          | Other survey                                        | SBH       |
| Djibouti | 1982-2006          | Multiple Indicator Cluster Survey                   | SBH       |
| Djibouti | 1983-1983          | Other survey                                        | SBH       |
| Djibouti | 1983-1996          | Pan Arab Project for Family Health                  | CBH       |
| Djibouti | 1986-1986          | Other survey                                        | SBH       |
| Djibouti | 1989-1989          | Other survey                                        | SBH       |
| Djibouti | 1999-2002          | Pan Arab Project for Family Health                  | CBH       |
| Eritrea  | 1970-2001          | Standard demographic and health survey              | CBH       |
| Eritrea  | 1971-2001          | Standard demographic and health survey              | SBH       |
| Eritrea  | 1992-1992          | Other survey                                        | SBH       |
| Eritrea  | 1995-1995          | Other survey                                        | SBH       |
| Eritrea  | 1996-1996          | Household Survey prepped via household death recall | HH        |
| Eritrea  | 1999-1999          | Other survey                                        | SBH       |
| Eritrea  | 2001-2001          | Other survey                                        | SBH       |
| Eritrea  | 2002-2002          | Household Survey prepped via household death recall | HH        |
| Eritrea  | 2004-2004          | Other survey                                        | SBH       |
| Eritrea  | 2007-2007          | Other survey                                        | SBH       |
| Ethiopia | 1959-2006          | Census                                              | SBH       |
| Ethiopia | 1970-2015          | Standard demographic and health survey              | CBH       |
| Ethiopia | 1974-1974          | Other survey                                        | SBH       |
| Ethiopia | 1975-2015          | Standard demographic and health survey              | SBH       |
| Ethiopia | 1977-1977          | Other survey                                        | SBH       |
| Ethiopia | 1980-1980          | Other survey                                        | SBH       |
| Ethiopia | 1983-1983          | Other survey                                        | SBH       |
| Ethiopia | 1985-1985          | Other survey                                        | SBH       |
| Ethiopia | 1987-1987          | Other survey                                        | SBH       |
| Kenya    | 1950-1977          | World Fertility Survey                              | CBH       |
| Kenya    | 1950-2008          | Census                                              | SBH       |
| Kenya    | 1953-1977          | World Fertility Survey                              | SBH       |
| Kenya    | 1961-2014          | Standard demographic and health survey              | CBH       |
| Kenya    | 1964-2014          | Standard demographic and health survey              | SBH       |
| Kenya    | 1970-2014          | Other survey                                        | SBH       |
| Kenya    | 1976-2000          | Multiple Indicator Cluster Survey                   | SBH       |
| Kenya    | 1983-2014          | Malaria Indicator Survey                            | SBH       |
| Baringo  | 1950-2008          | Census                                              | SBH       |
| Baringo  | 1964-2014          | Standard demographic and health survey              | SBH       |
| Baringo  | 1970-2005          | Other survey                                        | SBH       |
| Baringo  | 1976-2000          | Multiple Indicator Cluster Survey                   | SBH       |
| Baringo  | 1979-2014          | Standard demographic and health survey              | CBH       |
| Baringo  | 1988-2003          | Malaria Indicator Survey                            | SBH       |
| Bomet    | 1970-2005          | Other survey                                        | SBH       |
| Bomet    | 1975-2008          | Census                                              | SBH       |
| Bomet    | 1976-2000          | Multiple Indicator Cluster Survey                   | SBH       |
| Bomet    | 1978-2014          | Standard demographic and health survey              | SBH       |
| Bomet    | 1983-2007          | Malaria Indicator Survey                            | SBH       |

**Appendix Table 5. Under-5 mortality reference sources by source date and location, 1950-2017**

| Location        | Year range of data | Reference source                       | Data type |
|-----------------|--------------------|----------------------------------------|-----------|
| Bomet           | 1987-2014          | Standard demographic and health survey | CBH       |
| Bungoma         | 1950-2008          | Census                                 | SBH       |
| Bungoma         | 1964-2014          | Standard demographic and health survey | SBH       |
| Bungoma         | 1970-2014          | Other survey                           | SBH       |
| Bungoma         | 1973-2014          | Standard demographic and health survey | CBH       |
| Bungoma         | 1976-2000          | Multiple Indicator Cluster Survey      | SBH       |
| Bungoma         | 1983-2007          | Malaria Indicator Survey               | SBH       |
| Bungoma         | 1996-2013          | Multiple Indicator Cluster Survey      | CBH       |
| Busia           | 1950-2008          | Census                                 | SBH       |
| Busia           | 1964-2014          | Standard demographic and health survey | SBH       |
| Busia           | 1970-2005          | Other survey                           | SBH       |
| Busia           | 1973-2014          | Standard demographic and health survey | CBH       |
| Busia           | 1976-2000          | Multiple Indicator Cluster Survey      | SBH       |
| Busia           | 1983-2007          | Malaria Indicator Survey               | SBH       |
| Elgeyo-Marakwet | 1950-2008          | Census                                 | SBH       |
| Elgeyo-Marakwet | 1964-2014          | Standard demographic and health survey | SBH       |
| Elgeyo-Marakwet | 1970-2005          | Other survey                           | SBH       |
| Elgeyo-Marakwet | 1973-1974          | Standard demographic and health survey | CBH       |
| Elgeyo-Marakwet | 1976-2000          | Multiple Indicator Cluster Survey      | SBH       |
| Elgeyo-Marakwet | 1977-2014          | Standard demographic and health survey | CBH       |
| Elgeyo-Marakwet | 1983-2007          | Malaria Indicator Survey               | SBH       |
| Embu            | 1950-2008          | Census                                 | SBH       |
| Embu            | 1963-2014          | Standard demographic and health survey | SBH       |
| Embu            | 1970-2005          | Other survey                           | SBH       |
| Embu            | 1973-1974          | Standard demographic and health survey | CBH       |
| Embu            | 1976-2011          | Multiple Indicator Cluster Survey      | SBH       |
| Embu            | 1979-2014          | Standard demographic and health survey | CBH       |
| Embu            | 1983-2007          | Malaria Indicator Survey               | SBH       |
| Embu            | 1987-2008          | Multiple Indicator Cluster Survey      | CBH       |
| Garissa         | 1950-2008          | Census                                 | SBH       |
| Garissa         | 1970-2005          | Other survey                           | SBH       |
| Garissa         | 1976-2006          | Multiple Indicator Cluster Survey      | SBH       |
| Garissa         | 1978-2014          | Standard demographic and health survey | SBH       |
| Garissa         | 1983-2007          | Malaria Indicator Survey               | SBH       |
| Garissa         | 1987-2014          | Standard demographic and health survey | CBH       |
| HomaBay         | 1950-2008          | Census                                 | SBH       |
| HomaBay         | 1964-2005          | Other survey                           | SBH       |
| HomaBay         | 1976-2000          | Multiple Indicator Cluster Survey      | SBH       |
| HomaBay         | 1978-2014          | Standard demographic and health survey | SBH       |
| HomaBay         | 1983-2007          | Malaria Indicator Survey               | SBH       |
| HomaBay         | 1985-2014          | Standard demographic and health survey | CBH       |
| HomaBay         | 1994-2011          | Multiple Indicator Cluster Survey      | CBH       |
| Isiolo          | 1950-2008          | Census                                 | SBH       |
| Isiolo          | 1970-2005          | Other survey                           | SBH       |
| Isiolo          | 1976-2011          | Multiple Indicator Cluster Survey      | SBH       |
| Isiolo          | 1978-2014          | Standard demographic and health survey | SBH       |
| Isiolo          | 1987-1990          | Standard demographic and health survey | CBH       |
| Isiolo          | 1991-2008          | Multiple Indicator Cluster Survey      | CBH       |

**Appendix Table 5. Under-5 mortality reference sources by source date and location, 1950-2017**

| Location  | Year range of data | Reference source                       | Data type |
|-----------|--------------------|----------------------------------------|-----------|
| Isiolo    | 1992-2002          | Malaria Indicator Survey               | SBH       |
| Isiolo    | 1995-2014          | Standard demographic and health survey | CBH       |
| Kajiado   | 1950-2008          | Census                                 | SBH       |
| Kajiado   | 1958-2014          | Standard demographic and health survey | SBH       |
| Kajiado   | 1970-2005          | Other survey                           | SBH       |
| Kajiado   | 1975-1982          | Standard demographic and health survey | CBH       |
| Kajiado   | 1976-2000          | Multiple Indicator Cluster Survey      | SBH       |
| Kajiado   | 1983-2007          | Malaria Indicator Survey               | SBH       |
| Kajiado   | 1984-2014          | Standard demographic and health survey | CBH       |
| Kakamega  | 1950-2008          | Census                                 | SBH       |
| Kakamega  | 1964-2014          | Standard demographic and health survey | SBH       |
| Kakamega  | 1970-2005          | Other survey                           | SBH       |
| Kakamega  | 1971-2014          | Standard demographic and health survey | CBH       |
| Kakamega  | 1976-2000          | Multiple Indicator Cluster Survey      | SBH       |
| Kakamega  | 1983-2007          | Malaria Indicator Survey               | SBH       |
| Kakamega  | 1998-2013          | Multiple Indicator Cluster Survey      | CBH       |
| Kericho   | 1950-2008          | Census                                 | SBH       |
| Kericho   | 1964-2014          | Standard demographic and health survey | SBH       |
| Kericho   | 1970-2014          | Other survey                           | SBH       |
| Kericho   | 1973-2014          | Standard demographic and health survey | CBH       |
| Kericho   | 1976-2000          | Multiple Indicator Cluster Survey      | SBH       |
| Kericho   | 1983-2007          | Malaria Indicator Survey               | SBH       |
| Kiambu    | 1950-2008          | Census                                 | SBH       |
| Kiambu    | 1964-2014          | Standard demographic and health survey | SBH       |
| Kiambu    | 1970-2014          | Other survey                           | SBH       |
| Kiambu    | 1975-2014          | Standard demographic and health survey | CBH       |
| Kiambu    | 1976-2000          | Multiple Indicator Cluster Survey      | SBH       |
| Kiambu    | 1983-2007          | Malaria Indicator Survey               | SBH       |
| Kilifi    | 1950-2008          | Census                                 | SBH       |
| Kilifi    | 1964-2014          | Standard demographic and health survey | SBH       |
| Kilifi    | 1970-2014          | Other survey                           | SBH       |
| Kilifi    | 1973-2014          | Standard demographic and health survey | CBH       |
| Kilifi    | 1976-2000          | Multiple Indicator Cluster Survey      | SBH       |
| Kilifi    | 1983-2007          | Malaria Indicator Survey               | SBH       |
| Kirinyaga | 1950-2008          | Census                                 | SBH       |
| Kirinyaga | 1964-2014          | Standard demographic and health survey | SBH       |
| Kirinyaga | 1970-2005          | Other survey                           | SBH       |
| Kirinyaga | 1973-2014          | Standard demographic and health survey | CBH       |
| Kirinyaga | 1976-2000          | Multiple Indicator Cluster Survey      | SBH       |
| Kirinyaga | 1983-2007          | Malaria Indicator Survey               | SBH       |
| Kisii     | 1950-2008          | Census                                 | SBH       |
| Kisii     | 1964-2014          | Standard demographic and health survey | SBH       |
| Kisii     | 1970-2005          | Other survey                           | SBH       |
| Kisii     | 1971-2014          | Standard demographic and health survey | CBH       |
| Kisii     | 1976-2000          | Multiple Indicator Cluster Survey      | SBH       |
| Kisii     | 1983-2007          | Malaria Indicator Survey               | SBH       |
| Kisii     | 1994-2011          | Multiple Indicator Cluster Survey      | CBH       |
| Kisumu    | 1950-2008          | Census                                 | SBH       |

**Appendix Table 5. Under-5 mortality reference sources by source date and location, 1950-2017**

| Location | Year range of data | Reference source                       | Data type |
|----------|--------------------|----------------------------------------|-----------|
| Kisumu   | 1964-2014          | Standard demographic and health survey | SBH       |
| Kisumu   | 1970-2005          | Other survey                           | SBH       |
| Kisumu   | 1973-2014          | Standard demographic and health survey | CBH       |
| Kisumu   | 1976-2000          | Multiple Indicator Cluster Survey      | SBH       |
| Kisumu   | 1983-2007          | Malaria Indicator Survey               | SBH       |
| Kisumu   | 1994-2011          | Multiple Indicator Cluster Survey      | CBH       |
| Kitui    | 1950-2008          | Census                                 | SBH       |
| Kitui    | 1964-2014          | Standard demographic and health survey | SBH       |
| Kitui    | 1970-2014          | Other survey                           | SBH       |
| Kitui    | 1973-2008          | Multiple Indicator Cluster Survey      | CBH       |
| Kitui    | 1975-2014          | Standard demographic and health survey | CBH       |
| Kitui    | 1976-2011          | Multiple Indicator Cluster Survey      | SBH       |
| Kitui    | 1983-2007          | Malaria Indicator Survey               | SBH       |
| Kwale    | 1950-2008          | Census                                 | SBH       |
| Kwale    | 1960-2014          | Standard demographic and health survey | SBH       |
| Kwale    | 1970-2005          | Other survey                           | SBH       |
| Kwale    | 1971-2014          | Standard demographic and health survey | CBH       |
| Kwale    | 1976-2000          | Multiple Indicator Cluster Survey      | SBH       |
| Kwale    | 1983-2007          | Malaria Indicator Survey               | SBH       |
| Laikipia | 1950-2008          | Census                                 | SBH       |
| Laikipia | 1964-2014          | Standard demographic and health survey | SBH       |
| Laikipia | 1970-2005          | Other survey                           | SBH       |
| Laikipia | 1976-2000          | Multiple Indicator Cluster Survey      | SBH       |
| Laikipia | 1977-1982          | Standard demographic and health survey | CBH       |
| Laikipia | 1985-1986          | Standard demographic and health survey | CBH       |
| Laikipia | 1993-2014          | Standard demographic and health survey | CBH       |
| Lamu     | 1950-2008          | Census                                 | SBH       |
| Lamu     | 1970-2005          | Other survey                           | SBH       |
| Lamu     | 1972-2014          | Standard demographic and health survey | SBH       |
| Lamu     | 1976-2000          | Multiple Indicator Cluster Survey      | SBH       |
| Lamu     | 1983-2007          | Malaria Indicator Survey               | SBH       |
| Lamu     | 1987-1988          | Standard demographic and health survey | CBH       |
| Lamu     | 1991-1992          | Standard demographic and health survey | CBH       |
| Lamu     | 1997-2014          | Standard demographic and health survey | CBH       |
| Machakos | 1950-2008          | Census                                 | SBH       |
| Machakos | 1964-2014          | Standard demographic and health survey | SBH       |
| Machakos | 1969-2005          | Other survey                           | SBH       |
| Machakos | 1971-2014          | Standard demographic and health survey | CBH       |
| Machakos | 1976-2011          | Multiple Indicator Cluster Survey      | SBH       |
| Machakos | 1983-2007          | Malaria Indicator Survey               | SBH       |
| Machakos | 1989-2008          | Multiple Indicator Cluster Survey      | CBH       |
| Makueni  | 1970-2005          | Other survey                           | SBH       |
| Makueni  | 1975-2008          | Census                                 | SBH       |
| Makueni  | 1976-2011          | Multiple Indicator Cluster Survey      | SBH       |
| Makueni  | 1978-2014          | Standard demographic and health survey | SBH       |
| Makueni  | 1983-2007          | Malaria Indicator Survey               | SBH       |
| Makueni  | 1985-1986          | Standard demographic and health survey | CBH       |
| Makueni  | 1989-2008          | Multiple Indicator Cluster Survey      | CBH       |

**Appendix Table 5. Under-5 mortality reference sources by source date and location, 1950-2017**

| Location | Year range of data | Reference source                       | Data type |
|----------|--------------------|----------------------------------------|-----------|
| Makueni  | 1989-2014          | Standard demographic and health survey | CBH       |
| Mandera  | 1950-2008          | Census                                 | SBH       |
| Mandera  | 1970-2005          | Other survey                           | SBH       |
| Mandera  | 1976-2006          | Multiple Indicator Cluster Survey      | SBH       |
| Mandera  | 1978-2014          | Standard demographic and health survey | SBH       |
| Mandera  | 1983-2007          | Malaria Indicator Survey               | SBH       |
| Mandera  | 1989-2014          | Standard demographic and health survey | CBH       |
| Marsabit | 1950-2008          | Census                                 | SBH       |
| Marsabit | 1970-2005          | Other survey                           | SBH       |
| Marsabit | 1973-1974          | Multiple Indicator Cluster Survey      | CBH       |
| Marsabit | 1978-2014          | Standard demographic and health survey | SBH       |
| Marsabit | 1979-2008          | Multiple Indicator Cluster Survey      | CBH       |
| Marsabit | 1983-2007          | Malaria Indicator Survey               | SBH       |
| Marsabit | 1984-2008          | Multiple Indicator Cluster Survey      | SBH       |
| Marsabit | 1993-2014          | Standard demographic and health survey | CBH       |
| Meru     | 1950-2008          | Census                                 | SBH       |
| Meru     | 1964-2014          | Standard demographic and health survey | SBH       |
| Meru     | 1970-2005          | Other survey                           | SBH       |
| Meru     | 1973-2014          | Standard demographic and health survey | CBH       |
| Meru     | 1983-2007          | Malaria Indicator Survey               | SBH       |
| Meru     | 1984-2008          | Multiple Indicator Cluster Survey      | SBH       |
| Meru     | 1985-2008          | Multiple Indicator Cluster Survey      | CBH       |
| Migori   | 1970-2005          | Other survey                           | SBH       |
| Migori   | 1975-2008          | Census                                 | SBH       |
| Migori   | 1976-2000          | Multiple Indicator Cluster Survey      | SBH       |
| Migori   | 1978-2014          | Standard demographic and health survey | SBH       |
| Migori   | 1983-2007          | Malaria Indicator Survey               | SBH       |
| Migori   | 1987-2014          | Standard demographic and health survey | CBH       |
| Migori   | 1994-2011          | Multiple Indicator Cluster Survey      | CBH       |
| Mombasa  | 1950-2008          | Census                                 | SBH       |
| Mombasa  | 1964-2014          | Standard demographic and health survey | SBH       |
| Mombasa  | 1970-2005          | Other survey                           | SBH       |
| Mombasa  | 1973-2014          | Standard demographic and health survey | CBH       |
| Mombasa  | 1976-2000          | Multiple Indicator Cluster Survey      | SBH       |
| Mombasa  | 1983-2007          | Malaria Indicator Survey               | SBH       |
| Mombasa  | 1991-2008          | Multiple Indicator Cluster Survey      | CBH       |
| Murang'a | 1950-2008          | Census                                 | SBH       |
| Murang'a | 1964-2014          | Standard demographic and health survey | SBH       |
| Murang'a | 1970-2005          | Other survey                           | SBH       |
| Murang'a | 1971-2014          | Standard demographic and health survey | CBH       |
| Murang'a | 1976-2000          | Multiple Indicator Cluster Survey      | SBH       |
| Murang'a | 1983-2007          | Malaria Indicator Survey               | SBH       |
| Nairobi  | 1950-2008          | Census                                 | SBH       |
| Nairobi  | 1964-2008          | Standard demographic and health survey | SBH       |
| Nairobi  | 1967-2014          | Other survey                           | SBH       |
| Nairobi  | 1973-2014          | Standard demographic and health survey | CBH       |
| Nairobi  | 1976-2000          | Multiple Indicator Cluster Survey      | SBH       |
| Nakuru   | 1950-2008          | Census                                 | SBH       |

**Appendix Table 5. Under-5 mortality reference sources by source date and location, 1950-2017**

| Location  | Year range of data | Reference source                       | Data type |
|-----------|--------------------|----------------------------------------|-----------|
| Nakuru    | 1964-2014          | Standard demographic and health survey | SBH       |
| Nakuru    | 1970-2005          | Other survey                           | SBH       |
| Nakuru    | 1975-2014          | Standard demographic and health survey | CBH       |
| Nakuru    | 1976-2000          | Multiple Indicator Cluster Survey      | SBH       |
| Nakuru    | 1983-2007          | Malaria Indicator Survey               | SBH       |
| Nandi     | 1950-2008          | Census                                 | SBH       |
| Nandi     | 1964-2014          | Standard demographic and health survey | SBH       |
| Nandi     | 1970-2014          | Other survey                           | SBH       |
| Nandi     | 1973-2014          | Standard demographic and health survey | CBH       |
| Nandi     | 1976-2000          | Multiple Indicator Cluster Survey      | SBH       |
| Nandi     | 1983-2007          | Malaria Indicator Survey               | SBH       |
| Narok     | 1950-2008          | Census                                 | SBH       |
| Narok     | 1964-2014          | Standard demographic and health survey | SBH       |
| Narok     | 1970-2005          | Other survey                           | SBH       |
| Narok     | 1975-1976          | Standard demographic and health survey | CBH       |
| Narok     | 1976-2000          | Multiple Indicator Cluster Survey      | SBH       |
| Narok     | 1979-1980          | Standard demographic and health survey | CBH       |
| Narok     | 1983-2007          | Malaria Indicator Survey               | SBH       |
| Narok     | 1983-2014          | Standard demographic and health survey | CBH       |
| Nyamira   | 1970-2014          | Other survey                           | SBH       |
| Nyamira   | 1973-2014          | Standard demographic and health survey | SBH       |
| Nyamira   | 1975-2008          | Census                                 | SBH       |
| Nyamira   | 1976-2000          | Multiple Indicator Cluster Survey      | SBH       |
| Nyamira   | 1982-2014          | Standard demographic and health survey | CBH       |
| Nyamira   | 1983-2007          | Malaria Indicator Survey               | SBH       |
| Nyamira   | 1994-2011          | Multiple Indicator Cluster Survey      | CBH       |
| Nyandarua | 1950-2008          | Census                                 | SBH       |
| Nyandarua | 1964-2014          | Standard demographic and health survey | SBH       |
| Nyandarua | 1970-2005          | Other survey                           | SBH       |
| Nyandarua | 1975-1994          | Standard demographic and health survey | CBH       |
| Nyandarua | 1976-2000          | Multiple Indicator Cluster Survey      | SBH       |
| Nyandarua | 1996-2014          | Standard demographic and health survey | CBH       |
| Nyeri     | 1950-2008          | Census                                 | SBH       |
| Nyeri     | 1964-2014          | Standard demographic and health survey | SBH       |
| Nyeri     | 1970-2005          | Other survey                           | SBH       |
| Nyeri     | 1973-2014          | Standard demographic and health survey | CBH       |
| Nyeri     | 1976-2000          | Multiple Indicator Cluster Survey      | SBH       |
| Samburu   | 1950-2008          | Census                                 | SBH       |
| Samburu   | 1970-2005          | Other survey                           | SBH       |
| Samburu   | 1978-2014          | Standard demographic and health survey | SBH       |
| Samburu   | 1983-2007          | Malaria Indicator Survey               | SBH       |
| Samburu   | 1989-1992          | Standard demographic and health survey | CBH       |
| Samburu   | 1995-2014          | Standard demographic and health survey | CBH       |
| Siaya     | 1950-2008          | Census                                 | SBH       |
| Siaya     | 1964-2014          | Standard demographic and health survey | SBH       |
| Siaya     | 1970-2014          | Other survey                           | SBH       |
| Siaya     | 1973-2014          | Standard demographic and health survey | CBH       |
| Siaya     | 1976-2000          | Multiple Indicator Cluster Survey      | SBH       |



**Appendix Table 5. Under-5 mortality reference sources by source date and location, 1950-2017**

| Location     | Year range of data | Reference source                       | Data type |
|--------------|--------------------|----------------------------------------|-----------|
| Siaya        | 1983-2007          | Malaria Indicator Survey               | SBH       |
| Siaya        | 1994-2011          | Multiple Indicator Cluster Survey      | CBH       |
| TaitaTaveta  | 1950-2008          | Census                                 | SBH       |
| TaitaTaveta  | 1964-2014          | Standard demographic and health survey | SBH       |
| TaitaTaveta  | 1970-2005          | Other survey                           | SBH       |
| TaitaTaveta  | 1975-2014          | Standard demographic and health survey | CBH       |
| TaitaTaveta  | 1976-2000          | Multiple Indicator Cluster Survey      | SBH       |
| TaitaTaveta  | 1983-2007          | Malaria Indicator Survey               | SBH       |
| TanaRiver    | 1950-2008          | Census                                 | SBH       |
| TanaRiver    | 1968-2014          | Standard demographic and health survey | SBH       |
| TanaRiver    | 1970-2005          | Other survey                           | SBH       |
| TanaRiver    | 1976-2000          | Multiple Indicator Cluster Survey      | SBH       |
| TanaRiver    | 1987-1990          | Standard demographic and health survey | CBH       |
| TanaRiver    | 1990-2003          | Malaria Indicator Survey               | SBH       |
| TanaRiver    | 1993-2014          | Standard demographic and health survey | CBH       |
| TharakaNithi | 1970-2005          | Other survey                           | SBH       |
| TharakaNithi | 1975-2008          | Census                                 | SBH       |
| TharakaNithi | 1976-2008          | Multiple Indicator Cluster Survey      | SBH       |
| TharakaNithi | 1978-2014          | Standard demographic and health survey | SBH       |
| TharakaNithi | 1983-2007          | Malaria Indicator Survey               | SBH       |
| TharakaNithi | 1991-1992          | Standard demographic and health survey | CBH       |
| TharakaNithi | 1991-2008          | Multiple Indicator Cluster Survey      | CBH       |
| TharakaNithi | 1995-2014          | Standard demographic and health survey | CBH       |
| TransNzoia   | 1950-2008          | Census                                 | SBH       |
| TransNzoia   | 1964-2014          | Standard demographic and health survey | SBH       |
| TransNzoia   | 1970-2005          | Other survey                           | SBH       |
| TransNzoia   | 1975-2014          | Standard demographic and health survey | CBH       |
| TransNzoia   | 1976-2000          | Multiple Indicator Cluster Survey      | SBH       |
| TransNzoia   | 1983-2007          | Malaria Indicator Survey               | SBH       |
| Turkana      | 1950-2008          | Census                                 | SBH       |
| Turkana      | 1970-2005          | Other survey                           | SBH       |
| Turkana      | 1978-2014          | Standard demographic and health survey | SBH       |
| Turkana      | 1982-2006          | Multiple Indicator Cluster Survey      | SBH       |
| Turkana      | 1983-2007          | Malaria Indicator Survey               | SBH       |
| Turkana      | 1985-2014          | Standard demographic and health survey | CBH       |
| Turkana      | 1996-2013          | Multiple Indicator Cluster Survey      | CBH       |
| UasinGishu   | 1950-2008          | Census                                 | SBH       |
| UasinGishu   | 1964-2014          | Standard demographic and health survey | SBH       |
| UasinGishu   | 1970-2005          | Other survey                           | SBH       |
| UasinGishu   | 1973-2014          | Standard demographic and health survey | CBH       |
| UasinGishu   | 1976-2000          | Multiple Indicator Cluster Survey      | SBH       |
| UasinGishu   | 1983-2007          | Malaria Indicator Survey               | SBH       |
| Vihiga       | 1970-2005          | Other survey                           | SBH       |
| Vihiga       | 1975-2008          | Census                                 | SBH       |
| Vihiga       | 1976-2000          | Multiple Indicator Cluster Survey      | SBH       |
| Vihiga       | 1978-2014          | Standard demographic and health survey | SBH       |
| Vihiga       | 1983-2007          | Malaria Indicator Survey               | SBH       |
| Vihiga       | 1987-2014          | Standard demographic and health survey | CBH       |

**Appendix Table 5. Under-5 mortality reference sources by source date and location, 1950-2017**

| Location   | Year range of data | Reference source                       | Data type  |
|------------|--------------------|----------------------------------------|------------|
| Wajir      | 1950-2008          | Census                                 | SBH        |
| Wajir      | 1970-2005          | Other survey                           | SBH        |
| Wajir      | 1976-2006          | Multiple Indicator Cluster Survey      | SBH        |
| Wajir      | 1978-2014          | Standard demographic and health survey | SBH        |
| Wajir      | 1983-2007          | Malaria Indicator Survey               | SBH        |
| Wajir      | 1985-2014          | Standard demographic and health survey | CBH        |
| WestPokot  | 1950-2008          | Census                                 | SBH        |
| WestPokot  | 1964-2014          | Standard demographic and health survey | SBH        |
| WestPokot  | 1970-2005          | Other survey                           | SBH        |
| WestPokot  | 1976-2000          | Multiple Indicator Cluster Survey      | SBH        |
| WestPokot  | 1979-1982          | Standard demographic and health survey | CBH        |
| WestPokot  | 1983-2007          | Malaria Indicator Survey               | SBH        |
| WestPokot  | 1985-1995          | Standard demographic and health survey | CBH        |
| WestPokot  | 1997-2014          | Standard demographic and health survey | CBH        |
| Madagascar | 1955-1955          | Vital Registration                     | VR/SRS/DSP |
| Madagascar | 1957-1961          | Vital Registration                     | VR/SRS/DSP |
| Madagascar | 1964-1968          | Vital Registration                     | VR/SRS/DSP |
| Madagascar | 1967-2008          | Standard demographic and health survey | CBH        |
| Madagascar | 1968-2008          | Standard demographic and health survey | SBH        |
| Madagascar | 1970-1972          | Vital Registration                     | VR/SRS/DSP |
| Madagascar | 1976-2012          | Multiple Indicator Cluster Survey      | SBH        |
| Madagascar | 1986-2012          | Malaria Indicator Survey               | SBH        |
| Malawi     | 1953-1953          | Other survey                           | SBH        |
| Malawi     | 1957-1957          | Other survey                           | SBH        |
| Malawi     | 1959-1959          | Census                                 | SBH        |
| Malawi     | 1960-1960          | Other survey                           | SBH        |
| Malawi     | 1962-2007          | Census                                 | SBH        |
| Malawi     | 1963-1969          | Other survey                           | SBH        |
| Malawi     | 1967-2015          | Standard demographic and health survey | CBH        |
| Malawi     | 1968-2010          | Standard demographic and health survey | SBH        |
| Malawi     | 1971-1972          | Other survey                           | SBH        |
| Malawi     | 1974-2001          | Other survey                           | SBH        |
| Malawi     | 1977-2013          | Multiple Indicator Cluster Survey      | CBH        |
| Malawi     | 1982-2013          | Multiple Indicator Cluster Survey      | SBH        |
| Malawi     | 1987-2016          | Malaria Indicator Survey               | SBH        |
| Malawi     | 2003-2008          | Other survey                           | CBH        |
| Mozambique | 1972-2006          | Census                                 | SBH        |
| Mozambique | 1972-2011          | Standard demographic and health survey | SBH        |
| Mozambique | 1976-2011          | Standard demographic and health survey | CBH        |
| Mozambique | 1979-2008          | Multiple Indicator Cluster Survey      | CBH        |
| Mozambique | 1984-2008          | Multiple Indicator Cluster Survey      | SBH        |
| Mozambique | 1985-2009          | AIDS Indicator Survey                  | SBH        |
| Rwanda     | 1952-1952          | Census                                 | SBH        |
| Rwanda     | 1956-1956          | Census                                 | SBH        |
| Rwanda     | 1958-1983          | World Fertility Survey                 | CBH        |
| Rwanda     | 1959-1959          | Census                                 | SBH        |
| Rwanda     | 1959-1983          | World Fertility Survey                 | SBH        |
| Rwanda     | 1961-1962          | Census                                 | SBH        |

**Appendix Table 5. Under-5 mortality reference sources by source date and location, 1950-2017**

| Location    | Year range of data | Reference source                       | Data type |
|-------------|--------------------|----------------------------------------|-----------|
| Rwanda      | 1964-1964          | Census                                 | SBH       |
| Rwanda      | 1966-1993          | Census                                 | SBH       |
| Rwanda      | 1967-1993          | Standard demographic and health survey | CBH       |
| Rwanda      | 1968-1993          | Standard demographic and health survey | SBH       |
| Rwanda      | 1981-1993          | Other survey                           | SBH       |
| Rwanda      | 1983-1993          | Other demographic and health survey    | SBH       |
| Rwanda      | 1988-1993          | Malaria Indicator Survey               | SBH       |
| Rwanda      | 1995-2005          | Other survey                           | SBH       |
| Rwanda      | 1995-2007          | Other demographic and health survey    | SBH       |
| Rwanda      | 1995-2010          | Standard demographic and health survey | SBH       |
| Rwanda      | 1995-2012          | Census                                 | SBH       |
| Rwanda      | 1995-2012          | Malaria Indicator Survey               | SBH       |
| Rwanda      | 1995-2014          | Standard demographic and health survey | CBH       |
| Somalia     | 1982-2006          | Multiple Indicator Cluster Survey      | SBH       |
| Somalia     | 1983-2006          | Multiple Indicator Cluster Survey      | CBH       |
| South Sudan | 1983-2007          | Census                                 | SBH       |
| South Sudan | 1985-2009          | Multiple Indicator Cluster Survey      | SBH       |
| South Sudan | 1986-2009          | Multiple Indicator Cluster Survey      | CBH       |
| Tanzania    | 1962-2015          | Standard demographic and health survey | CBH       |
| Tanzania    | 1963-2002          | Census                                 | SBH       |
| Tanzania    | 1967-2015          | Standard demographic and health survey | SBH       |
| Tanzania    | 1968-1992          | Living Standards Measurement Study     | SBH       |
| Tanzania    | 1970-1994          | Other survey                           | SBH       |
| Tanzania    | 1978-2007          | AIDS Indicator Survey                  | CBH       |
| Tanzania    | 1979-2011          | AIDS Indicator Survey                  | SBH       |
| Uganda      | 1963-2016          | Standard demographic and health survey | CBH       |
| Uganda      | 1964-2016          | Standard demographic and health survey | SBH       |
| Uganda      | 1966-2001          | Census                                 | SBH       |
| Uganda      | 1968-2015          | Other survey                           | SBH       |
| Uganda      | 1984-2014          | Malaria Indicator Survey               | SBH       |
| Uganda      | 1985-2009          | Living Standards Measurement Study     | SBH       |
| Uganda      | 1986-2009          | Malaria Indicator Survey               | CBH       |
| Uganda      | 1986-2010          | AIDS Indicator Survey                  | SBH       |
| Zambia      | 1962-1962          | Census                                 | SBH       |
| Zambia      | 1964-2013          | Standard demographic and health survey | CBH       |
| Zambia      | 1965-2009          | Census                                 | SBH       |
| Zambia      | 1967-2013          | Standard demographic and health survey | SBH       |
| Zambia      | 1982-2011          | Malaria Indicator Survey               | SBH       |
| Botswana    | 1964-1988          | Standard demographic and health survey | SBH       |
| Botswana    | 1967-1988          | Standard demographic and health survey | CBH       |
| Botswana    | 1971-2005          | Other survey                           | SBH       |
| Botswana    | 1973-1973          | Census                                 | SBH       |
| Botswana    | 1976-1976          | Census                                 | SBH       |
| Botswana    | 1976-2000          | Multiple Indicator Cluster Survey      | SBH       |
| Botswana    | 1976-2007          | Other survey                           | CBH       |
| Botswana    | 1979-1979          | Census                                 | SBH       |
| Botswana    | 1982-1982          | Census                                 | SBH       |
| Botswana    | 1984-1984          | Census                                 | SBH       |

**Appendix Table 5. Under-5 mortality reference sources by source date and location, 1950-2017**

| Location     | Year range of data | Reference source                       | Data type  |
|--------------|--------------------|----------------------------------------|------------|
| Botswana     | 1987-1987          | Census                                 | SBH        |
| Botswana     | 2010-2010          | Census                                 | HH         |
| Lesotho      | 1953-1977          | World Fertility Survey                 | SBH        |
| Lesotho      | 1954-1977          | World Fertility Survey                 | CBH        |
| Lesotho      | 1967-1967          | Census                                 | SBH        |
| Lesotho      | 1971-1971          | Census                                 | SBH        |
| Lesotho      | 1974-1974          | Census                                 | SBH        |
| Lesotho      | 1975-1999          | Multiple Indicator Cluster Survey      | SBH        |
| Lesotho      | 1977-1977          | Census                                 | SBH        |
| Lesotho      | 1979-2014          | Standard demographic and health survey | CBH        |
| Lesotho      | 1980-1980          | Census                                 | SBH        |
| Lesotho      | 1980-2014          | Standard demographic and health survey | SBH        |
| Lesotho      | 1982-1982          | Census                                 | SBH        |
| Lesotho      | 1982-1982          | Other survey                           | SBH        |
| Lesotho      | 1985-1985          | Other survey                           | SBH        |
| Lesotho      | 1988-1988          | Other survey                           | SBH        |
| Lesotho      | 1990-1990          | Other survey                           | SBH        |
| Lesotho      | 1992-1992          | Other survey                           | SBH        |
| Lesotho      | 1994-1995          | Other survey                           | SBH        |
| Lesotho      | 1997-1998          | Other survey                           | SBH        |
| Lesotho      | 2002-2002          | Other survey                           | SBH        |
| Lesotho      | 2005-2005          | Other survey                           | SBH        |
| Lesotho      | 2008-2008          | Other survey                           | SBH        |
| Lesotho      | 2010-2010          | Vital Registration                     | VR/SRS/DSP |
| Namibia      | 1968-2013          | Standard demographic and health survey | SBH        |
| Namibia      | 1969-2013          | Standard demographic and health survey | CBH        |
| Namibia      | 1973-1973          | Census                                 | SBH        |
| Namibia      | 1976-1976          | Census                                 | SBH        |
| Namibia      | 1979-1979          | Census                                 | SBH        |
| Namibia      | 1982-1982          | Census                                 | SBH        |
| Namibia      | 1985-1985          | Census                                 | SBH        |
| Namibia      | 1987-1987          | Census                                 | SBH        |
| Namibia      | 1992-1992          | Census                                 | SBH        |
| Namibia      | 1995-1995          | Census                                 | SBH        |
| Namibia      | 1998-1998          | Census                                 | SBH        |
| Namibia      | 2001-2001          | Census                                 | SBH        |
| Namibia      | 2004-2004          | Census                                 | SBH        |
| Namibia      | 2007-2007          | Census                                 | SBH        |
| South Africa | 1963-1987          | Other demographic and health survey    | SBH        |
| South Africa | 1968-1992          | Living Standards Measurement Study     | SBH        |
| South Africa | 1971-1996          | Census                                 | SBH        |
| South Africa | 1971-1998          | Standard demographic and health survey | CBH        |
| South Africa | 1973-1997          | Standard demographic and health survey | SBH        |
| South Africa | 1980-1982          | Vital Registration                     | VR/SRS/DSP |
| South Africa | 1991-2015          | Other survey                           | SBH        |
| South Africa | 1993-2015          | Vital Registration                     | VR/SRS/DSP |
| South Africa | 2000-2001          | Census                                 | HH         |
| South Africa | 2004-2004          | Standard demographic and health survey | HH         |

**Appendix Table 5. Under-5 mortality reference sources by source date and location, 1950-2017**

| Location     | Year range of data | Reference source                       | Data type  |
|--------------|--------------------|----------------------------------------|------------|
| South Africa | 2009-2009          | Standard demographic and health survey | HH         |
| South Africa | 2011-2011          | Census                                 | HH         |
| South Africa | 2014-2014          | Standard demographic and health survey | HH         |
| Swaziland    | 1976-2014          | Multiple Indicator Cluster Survey      | SBH        |
| Swaziland    | 1979-2006          | Standard demographic and health survey | CBH        |
| Swaziland    | 1982-2006          | Standard demographic and health survey | SBH        |
| Swaziland    | 1985-2014          | Multiple Indicator Cluster Survey      | CBH        |
| Zimbabwe     | 1963-2015          | Standard demographic and health survey | CBH        |
| Zimbabwe     | 1964-2015          | Standard demographic and health survey | SBH        |
| Zimbabwe     | 1981-2013          | Multiple Indicator Cluster Survey      | CBH        |
| Zimbabwe     | 1984-2013          | Multiple Indicator Cluster Survey      | SBH        |
| Zimbabwe     | 1990-1990          | Vital Registration                     | VR/SRS/DSP |
| Zimbabwe     | 1992-1992          | Census                                 | SBH        |
| Zimbabwe     | 1995-1995          | Vital Registration                     | VR/SRS/DSP |
| Zimbabwe     | 1995-1995          | Census                                 | SBH        |
| Zimbabwe     | 1998-1998          | Census                                 | SBH        |
| Zimbabwe     | 2001-2001          | Census                                 | SBH        |
| Zimbabwe     | 2004-2004          | Census                                 | SBH        |
| Zimbabwe     | 2007-2007          | Census                                 | SBH        |
| Benin        | 1957-1981          | World Fertility Survey                 | SBH        |
| Benin        | 1959-1982          | World Fertility Survey                 | CBH        |
| Benin        | 1969-2011          | Standard demographic and health survey | CBH        |
| Benin        | 1972-2011          | Standard demographic and health survey | SBH        |
| Benin        | 1973-1973          | Census                                 | SBH        |
| Benin        | 1977-1977          | Census                                 | SBH        |
| Benin        | 1980-1980          | Census                                 | SBH        |
| Benin        | 1983-1983          | Census                                 | SBH        |
| Benin        | 1985-1985          | Census                                 | SBH        |
| Benin        | 1985-2014          | Multiple Indicator Cluster Survey      | CBH        |
| Benin        | 1988-1988          | Census                                 | SBH        |
| Benin        | 1990-2014          | Multiple Indicator Cluster Survey      | SBH        |
| Burkina Faso | 1966-1966          | Census                                 | SBH        |
| Burkina Faso | 1967-2010          | Standard demographic and health survey | CBH        |
| Burkina Faso | 1968-2010          | Standard demographic and health survey | SBH        |
| Burkina Faso | 1970-1970          | Census                                 | SBH        |
| Burkina Faso | 1971-2005          | Census                                 | SBH        |
| Burkina Faso | 1981-2005          | Multiple Indicator Cluster Survey      | SBH        |
| Burkina Faso | 1989-2013          | Malaria Indicator Survey               | SBH        |
| Burkina Faso | 1991-1991          | Other survey                           | HH         |
| Burkina Faso | 1996-1996          | Census                                 | HH         |
| Burkina Faso | 2006-2006          | Census                                 | HH         |
| Cameroon     | 1951-1978          | World Fertility Survey                 | CBH        |
| Cameroon     | 1953-1977          | World Fertility Survey                 | SBH        |
| Cameroon     | 1967-2010          | Standard demographic and health survey | SBH        |
| Cameroon     | 1968-2011          | Standard demographic and health survey | CBH        |
| Cameroon     | 1976-2000          | Multiple Indicator Cluster Survey      | SBH        |
| Cameroon     | 1980-2004          | Census                                 | SBH        |
| Cameroon     | 1986-2013          | Multiple Indicator Cluster Survey      | CBH        |

**Appendix Table 5. Under-5 mortality reference sources by source date and location, 1950-2017**

| Location      | Year range of data | Reference source                       | Data type  |
|---------------|--------------------|----------------------------------------|------------|
| Cape Verde    | 1955-1957          | Vital Registration                     | VR/SRS/DSP |
| Cape Verde    | 1959-1960          | Vital Registration                     | VR/SRS/DSP |
| Cape Verde    | 1966-1975          | Vital Registration                     | VR/SRS/DSP |
| Cape Verde    | 1973-1997          | Reproductive Health Survey             | SBH        |
| Cape Verde    | 1977-1998          | Reproductive Health Survey             | CBH        |
| Cape Verde    | 1979-1980          | Vital Registration                     | VR/SRS/DSP |
| Cape Verde    | 1982-1982          | Census                                 | SBH        |
| Cape Verde    | 1983-1985          | Vital Registration                     | VR/SRS/DSP |
| Cape Verde    | 1985-1985          | Census                                 | SBH        |
| Cape Verde    | 1985-1985          | Standard demographic and health survey | SBH        |
| Cape Verde    | 1988-1988          | Census                                 | SBH        |
| Cape Verde    | 1988-1988          | Standard demographic and health survey | SBH        |
| Cape Verde    | 1990-1991          | Vital Registration                     | VR/SRS/DSP |
| Cape Verde    | 1991-1991          | Census                                 | SBH        |
| Cape Verde    | 1992-1992          | Standard demographic and health survey | HH         |
| Cape Verde    | 1992-1992          | Standard demographic and health survey | SBH        |
| Cape Verde    | 1994-1994          | Census                                 | SBH        |
| Cape Verde    | 1996-1996          | Census                                 | SBH        |
| Cape Verde    | 1996-1996          | Standard demographic and health survey | SBH        |
| Cape Verde    | 1997-1997          | Standard demographic and health survey | HH         |
| Cape Verde    | 1999-1999          | Standard demographic and health survey | SBH        |
| Cape Verde    | 2002-2002          | Standard demographic and health survey | HH         |
| Cape Verde    | 2002-2002          | Standard demographic and health survey | SBH        |
| Cape Verde    | 2011-2012          | Vital Registration                     | VR/SRS/DSP |
| Chad          | 1969-2014          | Standard demographic and health survey | CBH        |
| Chad          | 1972-2014          | Standard demographic and health survey | SBH        |
| Chad          | 1976-2009          | Multiple Indicator Cluster Survey      | SBH        |
| Cote d'Ivoire | 1955-1980          | World Fertility Survey                 | CBH        |
| Cote d'Ivoire | 1956-1980          | World Fertility Survey                 | SBH        |
| Cote d'Ivoire | 1961-1961          | Other survey                           | SBH        |
| Cote d'Ivoire | 1961-1986          | Living Standards Measurement Study     | CBH        |
| Cote d'Ivoire | 1964-1964          | Other survey                           | SBH        |
| Cote d'Ivoire | 1967-1967          | Other survey                           | SBH        |
| Cote d'Ivoire | 1967-2011          | Standard demographic and health survey | CBH        |
| Cote d'Ivoire | 1970-1970          | Other survey                           | SBH        |
| Cote d'Ivoire | 1970-2011          | Standard demographic and health survey | SBH        |
| Cote d'Ivoire | 1972-1972          | Other survey                           | SBH        |
| Cote d'Ivoire | 1974-1974          | Other survey                           | SBH        |
| Cote d'Ivoire | 1980-2005          | AIDS Indicator Survey                  | CBH        |
| Cote d'Ivoire | 1981-2005          | AIDS Indicator Survey                  | SBH        |
| Cote d'Ivoire | 1994-1994          | Multiple Indicator Cluster Survey      | HH         |
| Cote d'Ivoire | 1999-1999          | Multiple Indicator Cluster Survey      | HH         |
| Cote d'Ivoire | 2004-2004          | Multiple Indicator Cluster Survey      | HH         |
| Cote d'Ivoire | 2009-2009          | Multiple Indicator Cluster Survey      | HH         |
| Cote d'Ivoire | 2014-2014          | Multiple Indicator Cluster Survey      | HH         |
| The Gambia    | 1954-1954          | Census                                 | SBH        |
| The Gambia    | 1958-1958          | Census                                 | SBH        |
| The Gambia    | 1961-1961          | Census                                 | SBH        |

**Appendix Table 5. Under-5 mortality reference sources by source date and location, 1950-2017**

| Location      | Year range of data | Reference source                       | Data type |
|---------------|--------------------|----------------------------------------|-----------|
| The Gambia    | 1964-1964          | Census                                 | SBH       |
| The Gambia    | 1967-1967          | Census                                 | SBH       |
| The Gambia    | 1969-1969          | Census                                 | SBH       |
| The Gambia    | 1972-1972          | Other survey                           | SBH       |
| The Gambia    | 1975-1975          | Other survey                           | SBH       |
| The Gambia    | 1975-2005          | Multiple Indicator Cluster Survey      | SBH       |
| The Gambia    | 1978-1978          | Other survey                           | HH        |
| The Gambia    | 1979-1979          | Other survey                           | SBH       |
| The Gambia    | 1981-1981          | Other survey                           | SBH       |
| The Gambia    | 1983-1983          | Other survey                           | HH        |
| The Gambia    | 1983-1983          | Other survey                           | SBH       |
| The Gambia    | 1985-2012          | Standard demographic and health survey | CBH       |
| The Gambia    | 1986-1986          | Other survey                           | SBH       |
| The Gambia    | 1988-1988          | Other survey                           | HH        |
| The Gambia    | 1988-2012          | Standard demographic and health survey | SBH       |
| The Gambia    | 2007-2007          | Multiple Indicator Cluster Survey      | SBH       |
| Ghana         | 1954-1978          | World Fertility Survey                 | SBH       |
| Ghana         | 1954-1979          | World Fertility Survey                 | CBH       |
| Ghana         | 1962-2014          | Standard demographic and health survey | CBH       |
| Ghana         | 1963-2014          | Standard demographic and health survey | SBH       |
| Ghana         | 1967-2005          | Living Standards Measurement Study     | SBH       |
| Ghana         | 1975-2009          | Census                                 | SBH       |
| Ghana         | 1980-2007          | Other demographic and health survey    | CBH       |
| Ghana         | 1982-2011          | Multiple Indicator Cluster Survey      | SBH       |
| Ghana         | 1983-2007          | Other demographic and health survey    | SBH       |
| Ghana         | 1984-2011          | Multiple Indicator Cluster Survey      | CBH       |
| Ghana         | 1990-2014          | Other survey                           | SBH       |
| Ghana         | 1992-2016          | Malaria Indicator Survey               | SBH       |
| Guinea        | 1950-1950          | Other survey                           | SBH       |
| Guinea        | 1971-1995          | Census                                 | SBH       |
| Guinea        | 1972-2012          | Standard demographic and health survey | CBH       |
| Guinea        | 1975-2012          | Standard demographic and health survey | SBH       |
| Guinea        | 1980-1980          | Standard demographic and health survey | HH        |
| Guinea        | 1985-1985          | Standard demographic and health survey | HH        |
| Guinea        | 1990-1990          | Standard demographic and health survey | HH        |
| Guinea        | 2004-2004          | Multiple Indicator Cluster Survey      | HH        |
| Guinea        | 2009-2009          | Multiple Indicator Cluster Survey      | HH        |
| Guinea        | 2014-2014          | Multiple Indicator Cluster Survey      | HH        |
| Guinea-Bissau | 1975-2013          | Multiple Indicator Cluster Survey      | SBH       |
| Guinea-Bissau | 1986-2013          | Multiple Indicator Cluster Survey      | CBH       |
| Liberia       | 1961-1989          | Standard demographic and health survey | CBH       |
| Liberia       | 1961-1989          | Standard demographic and health survey | SBH       |
| Liberia       | 1983-1989          | Census                                 | SBH       |
| Liberia       | 1983-1989          | Malaria Indicator Survey               | CBH       |
| Liberia       | 1984-1989          | Malaria Indicator Survey               | SBH       |
| Liberia       | 1991-2007          | Census                                 | SBH       |
| Liberia       | 1991-2008          | Malaria Indicator Survey               | CBH       |
| Liberia       | 1991-2012          | Standard demographic and health survey | CBH       |

**Appendix Table 5. Under-5 mortality reference sources by source date and location, 1950-2017**

| Location              | Year range of data | Reference source                       | Data type  |
|-----------------------|--------------------|----------------------------------------|------------|
| Liberia               | 1991-2012          | Standard demographic and health survey | SBH        |
| Liberia               | 1991-2016          | Malaria Indicator Survey               | SBH        |
| Mali                  | 1962-2008          | Census                                 | SBH        |
| Mali                  | 1962-2012          | Standard demographic and health survey | SBH        |
| Mali                  | 1964-2012          | Standard demographic and health survey | CBH        |
| Mali                  | 1988-2015          | Multiple Indicator Cluster Survey      | CBH        |
| Mali                  | 1990-2014          | Malaria Indicator Survey               | SBH        |
| Mali                  | 1991-2015          | Multiple Indicator Cluster Survey      | SBH        |
| Mauritania            | 1956-1981          | World Fertility Survey                 | CBH        |
| Mauritania            | 1957-1981          | World Fertility Survey                 | SBH        |
| Mauritania            | 1961-1990          | Pan Arab Project for Child Development | CBH        |
| Mauritania            | 1965-1989          | Pan Arab Project for Child Development | SBH        |
| Mauritania            | 1969-1969          | Census                                 | SBH        |
| Mauritania            | 1972-1972          | Census                                 | SBH        |
| Mauritania            | 1973-2000          | Standard demographic and health survey | CBH        |
| Mauritania            | 1976-1976          | Census                                 | SBH        |
| Mauritania            | 1976-2000          | Standard demographic and health survey | SBH        |
| Mauritania            | 1979-1979          | Census                                 | SBH        |
| Mauritania            | 1981-1981          | Census                                 | SBH        |
| Mauritania            | 1982-2015          | Multiple Indicator Cluster Survey      | CBH        |
| Mauritania            | 1983-2011          | Multiple Indicator Cluster Survey      | SBH        |
| Mauritania            | 1984-1984          | Census                                 | SBH        |
| Niger                 | 1966-2011          | Standard demographic and health survey | CBH        |
| Niger                 | 1967-2011          | Standard demographic and health survey | SBH        |
| Niger                 | 1975-1999          | Multiple Indicator Cluster Survey      | SBH        |
| Nigeria               | 1962-2012          | Standard demographic and health survey | SBH        |
| Nigeria               | 1963-2012          | Standard demographic and health survey | CBH        |
| Nigeria               | 1974-2016          | Multiple Indicator Cluster Survey      | SBH        |
| Nigeria               | 1979-2009          | Other survey                           | SBH        |
| Nigeria               | 1981-2006          | Census                                 | SBH        |
| Nigeria               | 1985-2010          | Malaria Indicator Survey               | CBH        |
| Nigeria               | 1985-2014          | Malaria Indicator Survey               | SBH        |
| Nigeria               | 1987-2016          | Multiple Indicator Cluster Survey      | CBH        |
| Sao Tome and Principe | 1955-1958          | Vital Registration                     | VR/SRS/DSP |
| Sao Tome and Principe | 1962-1962          | Census                                 | SBH        |
| Sao Tome and Principe | 1962-1971          | Vital Registration                     | VR/SRS/DSP |
| Sao Tome and Principe | 1965-1965          | Census                                 | SBH        |
| Sao Tome and Principe | 1969-1969          | Census                                 | SBH        |
| Sao Tome and Principe | 1971-1971          | Census                                 | SBH        |
| Sao Tome and Principe | 1973-1973          | Census                                 | SBH        |
| Sao Tome and Principe | 1976-1976          | Census                                 | SBH        |
| Sao Tome and Principe | 1976-2013          | Multiple Indicator Cluster Survey      | SBH        |
| Sao Tome and Principe | 1977-1979          | Vital Registration                     | VR/SRS/DSP |
| Sao Tome and Principe | 1980-1980          | Census                                 | SBH        |
| Sao Tome and Principe | 1982-1982          | Census                                 | SBH        |
| Sao Tome and Principe | 1984-1984          | Census                                 | SBH        |
| Sao Tome and Principe | 1984-1985          | Vital Registration                     | VR/SRS/DSP |
| Sao Tome and Principe | 1984-2008          | Standard demographic and health survey | SBH        |



**Appendix Table 5. Under-5 mortality reference sources by source date and location, 1950-2017**

| Location              | Year range of data | Reference source                       | Data type  |
|-----------------------|--------------------|----------------------------------------|------------|
| Sao Tome and Principe | 1985-2008          | Standard demographic and health survey | CBH        |
| Sao Tome and Principe | 1987-1987          | Vital Registration                     | VR/SRS/DSP |
| Sao Tome and Principe | 1987-1987          | Census                                 | SBH        |
| Sao Tome and Principe | 1990-2013          | Multiple Indicator Cluster Survey      | CBH        |
| Senegal               | 1953-1978          | World Fertility Survey                 | CBH        |
| Senegal               | 1954-1978          | World Fertility Survey                 | SBH        |
| Senegal               | 1961-2014          | Standard demographic and health survey | SBH        |
| Senegal               | 1963-2016          | Standard demographic and health survey | CBH        |
| Senegal               | 1977-2001          | Census                                 | SBH        |
| Senegal               | 1979-2008          | Malaria Indicator Survey               | CBH        |
| Senegal               | 1981-2008          | Malaria Indicator Survey               | SBH        |
| Senegal               | 2005-2005          | Standard demographic and health survey | HH         |
| Senegal               | 2010-2010          | Standard demographic and health survey | HH         |
| Senegal               | 2012-2012          | Standard demographic and health survey | HH         |
| Senegal               | 2014-2017          | Standard demographic and health survey | HH         |
| Sierra Leone          | 1975-2010          | Multiple Indicator Cluster Survey      | SBH        |
| Sierra Leone          | 1979-2003          | Census                                 | SBH        |
| Sierra Leone          | 1981-2013          | Standard demographic and health survey | CBH        |
| Sierra Leone          | 1983-2013          | Standard demographic and health survey | SBH        |
| Sierra Leone          | 2008-2012          | Vital Registration                     | VR/SRS/DSP |
| Togo                  | 1953-1953          | Census                                 | SBH        |
| Togo                  | 1955-1955          | Census                                 | SBH        |
| Togo                  | 1957-1957          | Census                                 | SBH        |
| Togo                  | 1964-2013          | Standard demographic and health survey | SBH        |
| Togo                  | 1965-2013          | Standard demographic and health survey | CBH        |
| Togo                  | 1981-2010          | Multiple Indicator Cluster Survey      | SBH        |
| Togo                  | 1992-1992          | Census                                 | SBH        |
| Togo                  | 1995-1995          | Census                                 | SBH        |
| Togo                  | 1999-1999          | Census                                 | SBH        |
| Togo                  | 2002-2002          | Census                                 | SBH        |
| Togo                  | 2005-2005          | Census                                 | SBH        |
| Togo                  | 2007-2007          | Census                                 | SBH        |

Note: CBH: Complete birth history, SBH: Summary birth history, HH: Household survey, SIBS: Sibling History, VR: Vital Registration, SRS: Sample

**Appendix Table 6. Distribution of empirical life tables by GBD super-region and decade, 1950-2017**

| Location                                         | Life table type   | 1950-1959 | 1960-1969 | 1970-1979 | 1980-1989 | 1990-1999 | 2000-2009 | 2010-2017 | All years |
|--------------------------------------------------|-------------------|-----------|-----------|-----------|-----------|-----------|-----------|-----------|-----------|
| Southeast Asia, East Asia, and Oceania           | Total             | 38        | 97        | 91        | 126       | 162       | 358       | 253       | 1125      |
|                                                  | Location specific | 29        | 65        | 72        | 108       | 157       | 324       | 238       | 993       |
|                                                  | Universal         | 9         | 32        | 19        | 18        | 5         | 34        | 15        | 132       |
| Central Europe, Eastern Europe, and Central Asia | Total             | 171       | 302       | 315       | 605       | 1791      | 1812      | 1355      | 6351      |
|                                                  | Location specific | 120       | 218       | 244       | 357       | 1043      | 1220      | 1012      | 4214      |
|                                                  | Universal         | 51        | 84        | 71        | 248       | 748       | 592       | 343       | 2137      |
| High-income                                      | Total             | 604       | 1680      | 2160      | 4752      | 4598      | 4087      | 2752      | 20633     |
|                                                  | Location specific | 389       | 767       | 1294      | 3239      | 3009      | 2002      | 1602      | 12302     |
|                                                  | Universal         | 215       | 913       | 866       | 1513      | 1589      | 2085      | 1150      | 8331      |
| Latin America and Caribbean                      | Total             | 162       | 186       | 250       | 913       | 1190      | 1151      | 923       | 4775      |
|                                                  | Location specific | 149       | 149       | 198       | 815       | 1152      | 1147      | 909       | 4519      |
|                                                  | Universal         | 13        | 37        | 52        | 98        | 38        | 4         | 14        | 256       |
| North Africa and Middle East                     | Total             | 0         | 14        | 30        | 28        | 78        | 56        | 382       | 588       |
|                                                  | Location specific | 0         | 14        | 29        | 24        | 69        | 51        | 372       | 559       |
|                                                  | Universal         | 0         | 0         | 1         | 4         | 9         | 5         | 10        | 29        |
| South Asia                                       | Total             | 0         | 0         | 7         | 16        | 221       | 509       | 451       | 1204      |
|                                                  | Location specific | 0         | 0         | 7         | 16        | 221       | 509       | 451       | 1204      |
|                                                  | Universal         | 0         | 0         | 0         | 0         | 0         | 0         | 0         | 0         |
| Sub-Saharan Africa                               | Total             | 2         | 9         | 6         | 20        | 74        | 197       | 123       | 431       |
|                                                  | Location specific | 2         | 9         | 6         | 20        | 74        | 197       | 123       | 431       |
|                                                  | Universal         | 0         | 0         | 0         | 0         | 0         | 0         | 0         | 0         |
| All locations                                    | Total             | 977       | 2288      | 2859      | 6460      | 8114      | 8170      | 6239      | 35107     |
|                                                  | Location specific | 689       | 1222      | 1850      | 4579      | 5725      | 5450      | 4707      | 24222     |
|                                                  | Universal         | 288       | 1066      | 1009      | 1881      | 2389      | 2720      | 1532      | 10885     |

**Appendix Table 7. Locations by HIV estimation group**

| Group 1                  | Group 2A            | Group 2B                 | Group 2C                       |
|--------------------------|---------------------|--------------------------|--------------------------------|
| Angola                   | Antigua and Barbuda | Albania                  | Afghanistan                    |
| Benin                    | Argentina           | American Samoa           | Algeria                        |
| Botswana                 | Armenia             | Azerbaijan               | Andorra                        |
| Burkina Faso             | Australia           | Bahrain                  | Bangladesh                     |
| Burundi                  | Austria             | Bosnia and Herzegovina   | Bolivia                        |
| Cambodia                 | The Bahamas         | Brunei                   | Bhutan                         |
| Cameroon                 | Barbados            | China                    | Comoros                        |
| Cape Verde               | Belarus             | Cyprus                   | Federated States of Micronesia |
| Central African Republic | Belgium             | Egypt                    | Laos                           |
| Chad                     | Belize              | El Salvador              | Lebanon                        |
| Cote D'Ivoire            | Bermuda             | Fiji                     | Libya                          |
| DR Congo                 | Brazil              | FYR Macedonia            | Marshall Islands               |
| Djibouti                 | Bulgaria            | Guam                     | Mauritania                     |
| Dominican Republic       | Canada              | Greenland                | Morocco                        |
| Equatorial Guinea        | Chile               | Honduras                 | Nepal                          |
| Eritrea                  | Colombia            | Indonesia                | North Korea                    |
| Ethiopia                 | Costa Rica          | Iran                     | Pakistan                       |
| Gabon                    | Croatia             | Iraq                     | Samoa                          |
| The Gambia               | Cuba                | Jordan                   | Solomon Islands                |
| Ghana                    | Czech Republic      | Kiribati                 | Timor-Leste                    |
| Guinea                   | Denmark             | Malaysia                 | Tunisia                        |
| Guinea-Bissau            | Dominica            | Maldives                 | United Arab Emirates           |
| Haiti                    | Ecuador             | Mongolia                 | Vanuatu                        |
| Kenya                    | Estonia             | Montenegro               | Yemen                          |
| Lesotho                  | Finland             | Nicaragua                |                                |
| Liberia                  | France              | Northern Mariana Islands |                                |
| Madagascar               | Georgia             | Oman                     |                                |
| Malawi                   | Germany             | Palestine                |                                |
| Mali                     | Greece              | Paraguay                 |                                |
| Mozambique               | Grenada             | Peru                     |                                |
| Myanmar                  | Guatemala           | Qatar                    |                                |
| Namibia                  | Guyana              | Sao Tome and Principe    |                                |
| Niger                    | Hungary             | Saudi Arabia             |                                |
| Nigeria                  | Iceland             | Serbia                   |                                |
| Papua New Guinea         | Ireland             | Seychelles               |                                |
| Congo (Brazzaville)      | Israel              | Slovakia                 |                                |
| Rwanda                   | Italy               | Sri Lanka                |                                |
| Senegal                  | Jamaica             | Syria                    |                                |
| Sierra Leone             | Japan               | Tajikistan               |                                |
| South Africa             | Kazakhstan          | Thailand                 |                                |
| South Sudan              | Kyrgyzstan          | Tonga                    |                                |

**Appendix Table 7. Locations by HIV estimation group**

| Group 1      | Group 2A                         | Group 2B | Group 2C |
|--------------|----------------------------------|----------|----------|
| Swaziland    | Kuwait                           | Turkey   |          |
| Tanzania     | Latvia                           | Vietnam  |          |
| Togo         | Lithuania                        |          |          |
| Uganda       | Luxembourg                       |          |          |
| Zambia       | Macao                            |          |          |
| Zimbabwe     | Malta                            |          |          |
| India (1B)   | Mauritius                        |          |          |
| Sudan (1B)   | Mexico                           |          |          |
| Somalia (1B) | Moldova                          |          |          |
|              | Netherlands                      |          |          |
|              | Norway                           |          |          |
|              | New Zealand                      |          |          |
|              | Panama                           |          |          |
|              | Philippines                      |          |          |
|              | Poland                           |          |          |
|              | Puerto Rico                      |          |          |
|              | Portugal                         |          |          |
|              | Romania                          |          |          |
|              | Russia                           |          |          |
|              | Saint Lucia                      |          |          |
|              | Saint Vincent and the Grenadines |          |          |
|              | Singapore                        |          |          |
|              | Slovenia                         |          |          |
|              | South Korea                      |          |          |
|              | Spain                            |          |          |
|              | Suriname                         |          |          |
|              | Sweden                           |          |          |
|              | Switzerland                      |          |          |
|              | Taiwan (province of China)       |          |          |
|              | Trinidad and Tobago              |          |          |
|              | Turkmenistan                     |          |          |
|              | Ukraine                          |          |          |
|              | United Kingdom                   |          |          |
|              | USA                              |          |          |
|              | Uruguay                          |          |          |
|              | Uzbekistan                       |          |          |
|              | Venezuela                        |          |          |
|              | Virgin Islands, U.S.             |          |          |

**Appendix Table 8. Socio-demographic Index groupings by geography, based on 2017 values**

| Geography                                        | 2017 SDI | SDI Quintile    |
|--------------------------------------------------|----------|-----------------|
| Global                                           | 0.652    |                 |
| Central Europe, Eastern Europe, and Central Asia | 0.766    |                 |
| Central Asia                                     | 0.673    |                 |
| Armenia                                          | 0.702    | High-middle SDI |
| Azerbaijan                                       | 0.701    | High-middle SDI |
| Georgia                                          | 0.7      | High-middle SDI |
| Kazakhstan                                       | 0.735    | High-middle SDI |
| Kyrgyzstan                                       | 0.607    | Low-middle SDI  |
| Mongolia                                         | 0.662    | Middle SDI      |
| Tajikistan                                       | 0.523    | Low-middle SDI  |
| Turkmenistan                                     | 0.696    | Middle SDI      |
| Uzbekistan                                       | 0.63     | Middle SDI      |
| Central Europe                                   | 0.814    |                 |
| Albania                                          | 0.685    | Middle SDI      |
| Bosnia and Herzegovina                           | 0.713    | High-middle SDI |
| Bulgaria                                         | 0.792    | High-middle SDI |
| Croatia                                          | 0.825    | High SDI        |
| Czech Republic                                   | 0.851    | High SDI        |
| Hungary                                          | 0.817    | High-middle SDI |
| Macedonia                                        | 0.754    | High-middle SDI |
| Montenegro                                       | 0.788    | High-middle SDI |
| Poland                                           | 0.844    | High SDI        |
| Romania                                          | 0.784    | High-middle SDI |
| Serbia                                           | 0.752    | High-middle SDI |
| Slovakia                                         | 0.842    | High SDI        |
| Slovenia                                         | 0.86     | High SDI        |
| Eastern Europe                                   | 0.785    |                 |
| Belarus                                          | 0.773    | High-middle SDI |
| Estonia                                          | 0.858    | High SDI        |
| Latvia                                           | 0.825    | High SDI        |
| Lithuania                                        | 0.841    | High SDI        |
| Moldova                                          | 0.676    | Middle SDI      |
| Russian Federation                               | 0.792    | High-middle SDI |
| Ukraine                                          | 0.74     | High-middle SDI |
| High-income                                      | 0.854    |                 |
| Australasia                                      | 0.869    |                 |
| Australia                                        | 0.873    | High SDI        |
| New Zealand                                      | 0.842    | High SDI        |
| High-income Asia-Pacific                         | 0.869    |                 |
| Brunei                                           | 0.856    | High SDI        |
| Japan                                            | 0.865    | High SDI        |
| Aichi                                            | 0.875    | High SDI        |
| Akita                                            | 0.829    | High SDI        |
| Aomori                                           | 0.825    | High SDI        |

**Appendix Table 8. Socio-demographic Index groupings by geography, based on 2017 values**

| Geography   | 2017 SDI | SDI Quintile |
|-------------|----------|--------------|
| Chiba       | 0.859    | High SDI     |
| Ehime       | 0.838    | High SDI     |
| Fukui       | 0.852    | High SDI     |
| Fukuoka     | 0.855    | High SDI     |
| Fukushima   | 0.831    | High SDI     |
| Gifu        | 0.849    | High SDI     |
| Gunma       | 0.851    | High SDI     |
| Hiroshima   | 0.863    | High SDI     |
| Hokkaidō    | 0.842    | High SDI     |
| Hyōgo       | 0.86     | High SDI     |
| Ibaraki     | 0.851    | High SDI     |
| Ishikawa    | 0.856    | High SDI     |
| Iwate       | 0.825    | High SDI     |
| Kagawa      | 0.85     | High SDI     |
| Kagoshima   | 0.83     | High SDI     |
| Kanagawa    | 0.875    | High SDI     |
| Kōchi       | 0.825    | High SDI     |
| Kumamoto    | 0.832    | High SDI     |
| Kyōto       | 0.873    | High SDI     |
| Mie         | 0.854    | High SDI     |
| Miyagi      | 0.85     | High SDI     |
| Miyazaki    | 0.823    | High SDI     |
| Nagano      | 0.851    | High SDI     |
| Nagasaki    | 0.826    | High SDI     |
| Nara        | 0.848    | High SDI     |
| Niigata     | 0.843    | High SDI     |
| Ōita        | 0.846    | High SDI     |
| Okayama     | 0.856    | High SDI     |
| Okinawa     | 0.818    | High SDI     |
| Ōsaka       | 0.872    | High SDI     |
| Saga        | 0.834    | High SDI     |
| Saitama     | 0.852    | High SDI     |
| Shiga       | 0.871    | High SDI     |
| Shimane     | 0.831    | High SDI     |
| Shizuoka    | 0.859    | High SDI     |
| Tochigi     | 0.853    | High SDI     |
| Tokushima   | 0.845    | High SDI     |
| Tōkyō       | 0.924    | High SDI     |
| Tottori     | 0.834    | High SDI     |
| Toyama      | 0.86     | High SDI     |
| Wakayama    | 0.84     | High SDI     |
| Yamagata    | 0.832    | High SDI     |
| Yamaguchi   | 0.849    | High SDI     |
| Yamanashi   | 0.854    | High SDI     |
| South Korea | 0.872    | High SDI     |

**Appendix Table 8. Socio-demographic Index groupings by geography, based on 2017 values**

| <b>Geography</b>          | <b>2017 SDI</b> | <b>SDI Quintile</b> |
|---------------------------|-----------------|---------------------|
| Singapore                 | 0.872           | High SDI            |
| High-income North America | 0.868           |                     |
| Canada                    | 0.882           | High SDI            |
| Greenland                 | 0.76            | High-middle SDI     |
| USA                       | 0.867           | High SDI            |
| Alabama                   | 0.837           | High SDI            |
| Alaska                    | 0.861           | High SDI            |
| Arizona                   | 0.845           | High SDI            |
| Arkansas                  | 0.826           | High SDI            |
| California                | 0.872           | High SDI            |
| Colorado                  | 0.882           | High SDI            |
| Connecticut               | 0.906           | High SDI            |
| Delaware                  | 0.874           | High SDI            |
| Washington, DC            | 0.89            | High SDI            |
| Florida                   | 0.864           | High SDI            |
| Georgia                   | 0.848           | High SDI            |
| Hawaii                    | 0.872           | High SDI            |
| Idaho                     | 0.841           | High SDI            |
| Illinois                  | 0.879           | High SDI            |
| Indiana                   | 0.848           | High SDI            |
| Iowa                      | 0.87            | High SDI            |
| Kansas                    | 0.864           | High SDI            |
| Kentucky                  | 0.831           | High SDI            |
| Louisiana                 | 0.835           | High SDI            |
| Maine                     | 0.872           | High SDI            |
| Maryland                  | 0.896           | High SDI            |
| Massachusetts             | 0.913           | High SDI            |
| Michigan                  | 0.868           | High SDI            |
| Minnesota                 | 0.893           | High SDI            |
| Mississippi               | 0.819           | High SDI            |
| Missouri                  | 0.853           | High SDI            |
| Montana                   | 0.863           | High SDI            |
| Nebraska                  | 0.873           | High SDI            |
| Nevada                    | 0.847           | High SDI            |
| New Hampshire             | 0.904           | High SDI            |
| New Jersey                | 0.899           | High SDI            |
| New Mexico                | 0.835           | High SDI            |
| New York                  | 0.893           | High SDI            |
| North Carolina            | 0.85            | High SDI            |
| North Dakota              | 0.88            | High SDI            |
| Ohio                      | 0.858           | High SDI            |
| Oklahoma                  | 0.838           | High SDI            |
| Oregon                    | 0.871           | High SDI            |
| Pennsylvania              | 0.879           | High SDI            |
| Rhode Island              | 0.89            | High SDI            |

**Appendix Table 8. Socio-demographic Index groupings by geography, based on 2017 values**

| <b>Geography</b>        | <b>2017 SDI</b> | <b>SDI Quintile</b> |
|-------------------------|-----------------|---------------------|
| South Carolina          | 0.846           | High SDI            |
| South Dakota            | 0.86            | High SDI            |
| Tennessee               | 0.837           | High SDI            |
| Texas                   | 0.838           | High SDI            |
| Utah                    | 0.856           | High SDI            |
| Vermont                 | 0.896           | High SDI            |
| Virginia                | 0.885           | High SDI            |
| Washington              | 0.884           | High SDI            |
| West Virginia           | 0.825           | High SDI            |
| Wisconsin               | 0.878           | High SDI            |
| Wyoming                 | 0.869           | High SDI            |
| Southern Latin America  | 0.72            |                     |
| Argentina               | 0.71            | High-middle SDI     |
| Chile                   | 0.748           | High-middle SDI     |
| Uruguay                 | 0.707           | High-middle SDI     |
| Western Europe          | 0.857           |                     |
| Andorra                 | 0.902           | High SDI            |
| Austria                 | 0.866           | High SDI            |
| Belgium                 | 0.886           | High SDI            |
| Cyprus                  | 0.865           | High SDI            |
| Denmark                 | 0.918           | High SDI            |
| Finland                 | 0.893           | High SDI            |
| France                  | 0.865           | High SDI            |
| Germany                 | 0.87            | High SDI            |
| Greece                  | 0.817           | High SDI            |
| Iceland                 | 0.907           | High SDI            |
| Ireland                 | 0.882           | High SDI            |
| Israel                  | 0.816           | High-middle SDI     |
| Italy                   | 0.843           | High SDI            |
| Luxembourg              | 0.916           | High SDI            |
| Malta                   | 0.836           | High SDI            |
| Netherlands             | 0.912           | High SDI            |
| Norway                  | 0.911           | High SDI            |
| Portugal                | 0.778           | High-middle SDI     |
| Spain                   | 0.825           | High SDI            |
| Sweden                  | 0.883           | High SDI            |
| Stockholm               | 0.914           | High SDI            |
| Sweden except Stockholm | 0.873           | High SDI            |
| Switzerland             | 0.889           | High SDI            |
| United Kingdom          | 0.843           | High SDI            |
| England                 | 0.849           | High SDI            |
| East Midlands           | 0.83            | High SDI            |
| Derby                   | 0.846           | High SDI            |
| Derbyshire              | 0.817           | High SDI            |
| Leicester               | 0.839           | High SDI            |



**Appendix Table 8. Socio-demographic Index groupings by geography, based on 2017 values**

| <b>Geography</b>       | <b>2017 SDI</b> | <b>SDI Quintile</b> |
|------------------------|-----------------|---------------------|
| Leicestershire         | 0.846           | High SDI            |
| Lincolnshire           | 0.812           | High SDI            |
| Northamptonshire       | 0.829           | High SDI            |
| Nottingham             | 0.863           | High SDI            |
| Nottinghamshire        | 0.814           | High SDI            |
| Rutland                | 0.833           | High SDI            |
| East of England        | 0.84            | High SDI            |
| Bedford                | 0.838           | High SDI            |
| Cambridgeshire         | 0.871           | High SDI            |
| Central Bedfordshire   | 0.834           | High SDI            |
| Essex                  | 0.832           | High SDI            |
| Hertfordshire          | 0.87            | High SDI            |
| Luton                  | 0.833           | High SDI            |
| Norfolk                | 0.826           | High SDI            |
| Peterborough           | 0.818           | High SDI            |
| Southend-on-Sea        | 0.811           | High SDI            |
| Suffolk                | 0.821           | High SDI            |
| Thurrock               | 0.807           | High SDI            |
| Greater London         | 0.894           | High SDI            |
| Barking and Dagenham   | 0.802           | High SDI            |
| Barnet                 | 0.865           | High SDI            |
| Bexley                 | 0.826           | High SDI            |
| Brent                  | 0.849           | High SDI            |
| Bromley                | 0.848           | High SDI            |
| Camden                 | 0.93            | High SDI            |
| Croydon                | 0.833           | High SDI            |
| Ealing                 | 0.865           | High SDI            |
| Enfield                | 0.839           | High SDI            |
| Greenwich              | 0.833           | High SDI            |
| Hackney                | 0.887           | High SDI            |
| Hammersmith and Fulham | 0.927           | High SDI            |
| Haringey               | 0.854           | High SDI            |
| Harrow                 | 0.848           | High SDI            |
| Havering               | 0.824           | High SDI            |
| Hillingdon             | 0.882           | High SDI            |
| Hounslow               | 0.879           | High SDI            |
| Islington              | 0.922           | High SDI            |
| Kensington and Chelsea | 0.932           | High SDI            |
| Kingston upon Thames   | 0.89            | High SDI            |
| Lambeth                | 0.9             | High SDI            |
| Lewisham               | 0.843           | High SDI            |
| Merton                 | 0.873           | High SDI            |
| Newham                 | 0.838           | High SDI            |
| Redbridge              | 0.831           | High SDI            |
| Richmond upon Thames   | 0.902           | High SDI            |

**Appendix Table 8. Socio-demographic Index groupings by geography, based on 2017 values**

| <b>Geography</b>          | <b>2017 SDI</b> | <b>SDI Quintile</b> |
|---------------------------|-----------------|---------------------|
| Southwark                 | 0.912           | High SDI            |
| Sutton                    | 0.843           | High SDI            |
| Tower Hamlets             | 0.905           | High SDI            |
| Waltham Forest            | 0.819           | High SDI            |
| Wandsworth                | 0.911           | High SDI            |
| Westminster               | 0.927           | High SDI            |
| North East England        | 0.821           | High SDI            |
| County Durham             | 0.81            | High SDI            |
| Darlington                | 0.825           | High SDI            |
| Gateshead                 | 0.826           | High SDI            |
| Hartlepool                | 0.793           | High SDI            |
| Middlesbrough             | 0.808           | High SDI            |
| Newcastle upon Tyne       | 0.872           | High SDI            |
| North Tyneside            | 0.825           | High SDI            |
| Northumberland            | 0.808           | High SDI            |
| Redcar and Cleveland      | 0.79            | High SDI            |
| South Tyneside            | 0.794           | High SDI            |
| Stockton-on-Tees          | 0.823           | High SDI            |
| Sunderland                | 0.815           | High SDI            |
| North West England        | 0.834           | High SDI            |
| Blackburn with Darwen     | 0.802           | High SDI            |
| Blackpool                 | 0.781           | High SDI            |
| Bolton                    | 0.805           | High SDI            |
| Bury                      | 0.815           | High SDI            |
| Cheshire East             | 0.864           | High SDI            |
| Cheshire West and Chester | 0.855           | High SDI            |
| Cumbria                   | 0.828           | High SDI            |
| Halton                    | 0.824           | High SDI            |
| Knowsley                  | 0.816           | High SDI            |
| Lancashire                | 0.831           | High SDI            |
| Liverpool                 | 0.852           | High SDI            |
| Manchester                | 0.885           | High SDI            |
| Oldham                    | 0.79            | High SDI            |
| Rochdale                  | 0.795           | High SDI            |
| Salford                   | 0.838           | High SDI            |
| Sefton                    | 0.812           | High SDI            |
| St Helens                 | 0.803           | High SDI            |
| Stockport                 | 0.843           | High SDI            |
| Tameside                  | 0.797           | High SDI            |
| Trafford                  | 0.873           | High SDI            |
| Warrington                | 0.86            | High SDI            |
| Wigan                     | 0.798           | High SDI            |
| Wirral                    | 0.803           | High SDI            |
| South East England        | 0.856           | High SDI            |
| Bracknell Forest          | 0.869           | High SDI            |

**Appendix Table 8. Socio-demographic Index groupings by geography, based on 2017 values**

| <b>Geography</b>             | <b>2017 SDI</b> | <b>SDI Quintile</b> |
|------------------------------|-----------------|---------------------|
| Brighton and Hove            | 0.885           | High SDI            |
| Buckinghamshire              | 0.865           | High SDI            |
| East Sussex                  | 0.814           | High SDI            |
| Hampshire                    | 0.85            | High SDI            |
| Isle of Wight                | 0.814           | High SDI            |
| Kent                         | 0.828           | High SDI            |
| Medway                       | 0.809           | High SDI            |
| Milton Keynes                | 0.86            | High SDI            |
| Oxfordshire                  | 0.879           | High SDI            |
| Portsmouth                   | 0.86            | High SDI            |
| Reading                      | 0.895           | High SDI            |
| Slough                       | 0.859           | High SDI            |
| Southampton                  | 0.858           | High SDI            |
| Surrey                       | 0.883           | High SDI            |
| West Berkshire               | 0.872           | High SDI            |
| West Sussex                  | 0.843           | High SDI            |
| Windsor and Maidenhead       | 0.889           | High SDI            |
| Wokingham                    | 0.885           | High SDI            |
| South West England           | 0.841           | High SDI            |
| Bath and North East Somerset | 0.875           | High SDI            |
| Bournemouth                  | 0.858           | High SDI            |
| Bristol, City of             | 0.884           | High SDI            |
| Cornwall                     | 0.817           | High SDI            |
| Devon                        | 0.837           | High SDI            |
| Dorset                       | 0.825           | High SDI            |
| Gloucestershire              | 0.85            | High SDI            |
| North Somerset               | 0.832           | High SDI            |
| Plymouth                     | 0.836           | High SDI            |
| Poole                        | 0.842           | High SDI            |
| Somerset                     | 0.816           | High SDI            |
| South Gloucestershire        | 0.867           | High SDI            |
| Swindon                      | 0.847           | High SDI            |
| Torbay                       | 0.79            | High SDI            |
| Wiltshire                    | 0.829           | High SDI            |
| West Midlands                | 0.829           | High SDI            |
| Birmingham                   | 0.84            | High SDI            |
| Coventry                     | 0.848           | High SDI            |
| Dudley                       | 0.799           | High SDI            |
| Herefordshire, County of     | 0.828           | High SDI            |
| Sandwell                     | 0.797           | High SDI            |
| Shropshire                   | 0.832           | High SDI            |
| Solihull                     | 0.855           | High SDI            |
| Staffordshire                | 0.826           | High SDI            |
| Stoke-on-Trent               | 0.804           | High SDI            |
| Telford and Wrekin           | 0.822           | High SDI            |

**Appendix Table 8. Socio-demographic Index groupings by geography, based on 2017 values**

| <b>Geography</b>                 | <b>2017 SDI</b> | <b>SDI Quintile</b> |
|----------------------------------|-----------------|---------------------|
| Walsall                          | 0.791           | High SDI            |
| Warwickshire                     | 0.857           | High SDI            |
| Wolverhampton                    | 0.811           | High SDI            |
| Worcestershire                   | 0.833           | High SDI            |
| Yorkshire and the Humber         | 0.83            | High SDI            |
| Barnsley                         | 0.787           | High SDI            |
| Bradford                         | 0.807           | High SDI            |
| Calderdale                       | 0.827           | High SDI            |
| Doncaster                        | 0.791           | High SDI            |
| East Riding of Yorkshire         | 0.822           | High SDI            |
| Kingston upon Hull, City of      | 0.813           | High SDI            |
| Kirklees                         | 0.816           | High SDI            |
| Leeds                            | 0.868           | High SDI            |
| North East Lincolnshire          | 0.804           | High SDI            |
| North Lincolnshire               | 0.811           | High SDI            |
| North Yorkshire                  | 0.839           | High SDI            |
| Rotherham                        | 0.796           | High SDI            |
| Sheffield                        | 0.853           | High SDI            |
| Wakefield                        | 0.806           | High SDI            |
| York                             | 0.879           | High SDI            |
| Northern Ireland                 | 0.835           | High SDI            |
| Scotland                         | 0.805           | High SDI            |
| Wales                            | 0.806           | High SDI            |
| Latin America and Caribbean      | 0.64            |                     |
| Andean Latin America             | 0.628           |                     |
| Bolivia                          | 0.587           | Low-middle SDI      |
| Ecuador                          | 0.636           | Middle SDI          |
| Peru                             | 0.636           | Middle SDI          |
| Caribbean                        | 0.638           |                     |
| Antigua and Barbuda              | 0.715           | High-middle SDI     |
| The Bahamas                      | 0.756           | High-middle SDI     |
| Barbados                         | 0.739           | High-middle SDI     |
| Belize                           | 0.602           | Low-middle SDI      |
| Bermuda                          | 0.805           | High-middle SDI     |
| Cuba                             | 0.688           | Middle SDI          |
| Dominica                         | 0.687           | Middle SDI          |
| Dominican Republic               | 0.593           | Low-middle SDI      |
| Grenada                          | 0.64            | Middle SDI          |
| Guyana                           | 0.584           | Low-middle SDI      |
| Haiti                            | 0.442           | Low SDI             |
| Jamaica                          | 0.679           | Middle SDI          |
| Puerto Rico                      | 0.813           | High-middle SDI     |
| Saint Lucia                      | 0.653           | Middle SDI          |
| Saint Vincent and the Grenadines | 0.608           | Middle SDI          |
| Suriname                         | 0.641           | Middle SDI          |

**Appendix Table 8. Socio-demographic Index groupings by geography, based on 2017 values**

| <b>Geography</b>                | <b>2017 SDI</b> | <b>SDI Quintile</b> |
|---------------------------------|-----------------|---------------------|
| Trinidad and Tobago             | 0.698           | Middle SDI          |
| Virgin Islands                  | 0.807           | High-middle SDI     |
| Central Latin America           | 0.623           |                     |
| Colombia                        | 0.634           | Middle SDI          |
| Costa Rica                      | 0.662           | Middle SDI          |
| El Salvador                     | 0.593           | Low-middle SDI      |
| Guatemala                       | 0.524           | Low-middle SDI      |
| Honduras                        | 0.512           | Low-middle SDI      |
| Mexico                          | 0.628           | Middle SDI          |
| Aguascalientes                  | 0.659           | Middle SDI          |
| Baja California                 | 0.657           | Middle SDI          |
| Baja California Sur             | 0.659           | Middle SDI          |
| Campeche                        | 0.616           | Middle SDI          |
| Chiapas                         | 0.533           | Middle SDI          |
| Chihuahua                       | 0.639           | Middle SDI          |
| Coahuila                        | 0.645           | Middle SDI          |
| Colima                          | 0.654           | Middle SDI          |
| Mexico City                     | 0.716           | Middle SDI          |
| Durango                         | 0.624           | Middle SDI          |
| Guanajuato                      | 0.621           | Middle SDI          |
| Guerrero                        | 0.562           | Middle SDI          |
| Hidalgo                         | 0.587           | Middle SDI          |
| Jalisco                         | 0.649           | Middle SDI          |
| México                          | 0.635           | Middle SDI          |
| Michoacán de Ocampo             | 0.586           | Middle SDI          |
| Morelos                         | 0.635           | Middle SDI          |
| Nayarit                         | 0.62            | Middle SDI          |
| Nuevo León                      | 0.677           | Middle SDI          |
| Oaxaca                          | 0.561           | Middle SDI          |
| Puebla                          | 0.584           | Middle SDI          |
| Querétaro                       | 0.639           | Middle SDI          |
| Quintana Roo                    | 0.626           | Middle SDI          |
| San Luis Potosí                 | 0.621           | Middle SDI          |
| Sinaloa                         | 0.649           | Middle SDI          |
| Sonora                          | 0.65            | Middle SDI          |
| Tabasco                         | 0.611           | Middle SDI          |
| Tamaulipas                      | 0.647           | Middle SDI          |
| Tlaxcala                        | 0.604           | Middle SDI          |
| Veracruz de Ignacio de la Llave | 0.592           | Middle SDI          |
| Yucatán                         | 0.63            | Middle SDI          |
| Zacatecas                       | 0.608           | Middle SDI          |
| Nicaragua                       | 0.53            | Low-middle SDI      |
| Panama                          | 0.677           | Middle SDI          |
| Venezuela                       | 0.655           | Middle SDI          |
| Tropical Latin America          | 0.662           |                     |

**Appendix Table 8. Socio-demographic Index groupings by geography, based on 2017 values**

| <b>Geography</b>             | <b>2017 SDI</b> | <b>SDI Quintile</b> |
|------------------------------|-----------------|---------------------|
| Brazil                       | 0.663           | Middle SDI          |
| Acre                         | 0.602           | Low-middle SDI      |
| Alagoas                      | 0.556           | Low-middle SDI      |
| Amapá                        | 0.659           | Middle SDI          |
| Amazonas                     | 0.629           | Middle SDI          |
| Bahia                        | 0.591           | Low-middle SDI      |
| Ceará                        | 0.6             | Low-middle SDI      |
| Distrito Federal             | 0.792           | High-middle SDI     |
| Espírito Santo               | 0.677           | Middle SDI          |
| Goiás                        | 0.65            | Middle SDI          |
| Maranhão                     | 0.507           | Low-middle SDI      |
| Mato Grosso                  | 0.662           | Middle SDI          |
| Mato Grosso do Sul           | 0.65            | Middle SDI          |
| Minas Gerais                 | 0.661           | Middle SDI          |
| Pará                         | 0.579           | Low-middle SDI      |
| Paraíba                      | 0.574           | Low-middle SDI      |
| Paraná                       | 0.682           | Middle SDI          |
| Pernambuco                   | 0.594           | Low-middle SDI      |
| Piauí                        | 0.552           | Low-middle SDI      |
| Rio de Janeiro               | 0.709           | High-middle SDI     |
| Rio Grande do Norte          | 0.605           | Low-middle SDI      |
| Rio Grande do Sul            | 0.693           | Middle SDI          |
| Rondônia                     | 0.622           | Middle SDI          |
| Roraima                      | 0.646           | Middle SDI          |
| Santa Catarina               | 0.702           | High-middle SDI     |
| São Paulo                    | 0.72            | High-middle SDI     |
| Sergipe                      | 0.616           | Middle SDI          |
| Tocantins                    | 0.611           | Middle SDI          |
| Paraguay                     | 0.619           | Middle SDI          |
| North Africa and Middle East | 0.639           |                     |
| North Africa and Middle East | 0.639           |                     |
| Afghanistan                  | 0.29            | Low SDI             |
| Algeria                      | 0.696           | Middle SDI          |
| Bahrain                      | 0.712           | High-middle SDI     |
| Egypt                        | 0.604           | Low-middle SDI      |
| Iran                         | 0.7             | High-middle SDI     |
| Iraq                         | 0.585           | Low-middle SDI      |
| Jordan                       | 0.697           | Middle SDI          |
| Kuwait                       | 0.786           | High-middle SDI     |
| Lebanon                      | 0.73            | High-middle SDI     |
| Libya                        | 0.761           | High-middle SDI     |
| Morocco                      | 0.579           | Low-middle SDI      |
| Palestine                    | 0.541           | Low-middle SDI      |
| Oman                         | 0.744           | High-middle SDI     |
| Qatar                        | 0.766           | High-middle SDI     |

**Appendix Table 8. Socio-demographic Index groupings by geography, based on 2017 values**

| <b>Geography</b>                   | <b>2017 SDI</b> | <b>SDI Quintile</b> |
|------------------------------------|-----------------|---------------------|
| Saudi Arabia                       | 0.779           | High-middle SDI     |
| Sudan                              | 0.478           | Low-middle SDI      |
| Syria                              | 0.611           | Middle SDI          |
| Tunisia                            | 0.675           | Middle SDI          |
| Turkey                             | 0.729           | High-middle SDI     |
| United Arab Emirates               | 0.795           | High-middle SDI     |
| Yemen                              | 0.43            | Low SDI             |
| South Asia                         | 0.534           |                     |
| South Asia                         | 0.534           |                     |
| Bangladesh                         | 0.458           | Low SDI             |
| Bhutan                             | 0.57            | Low-middle SDI      |
| India                              | 0.55            | Low-middle SDI      |
| Andhra Pradesh                     | 0.536           | Low-middle SDI      |
| Arunachal Pradesh                  | 0.556           | Low-middle SDI      |
| Assam                              | 0.53            | Low-middle SDI      |
| Bihar                              | 0.433           | Low SDI             |
| Chhattisgarh                       | 0.512           | Low-middle SDI      |
| Delhi                              | 0.715           | High-middle SDI     |
| Goa                                | 0.74            | High-middle SDI     |
| Gujarat                            | 0.584           | Low-middle SDI      |
| Haryana                            | 0.6             | Low-middle SDI      |
| Himachal Pradesh                   | 0.633           | Middle SDI          |
| Jammu and Kashmir                  | 0.59            | Low-middle SDI      |
| Jharkhand                          | 0.487           | Low-middle SDI      |
| Karnataka                          | 0.574           | Low-middle SDI      |
| Kerala                             | 0.659           | Middle SDI          |
| Madhya Pradesh                     | 0.487           | Low-middle SDI      |
| Maharashtra                        | 0.618           | Middle SDI          |
| Manipur                            | 0.59            | Low-middle SDI      |
| Meghalaya                          | 0.565           | Low-middle SDI      |
| Mizoram                            | 0.616           | Middle SDI          |
| Nagaland                           | 0.633           | Middle SDI          |
| Odisha                             | 0.524           | Low-middle SDI      |
| Punjab                             | 0.622           | Middle SDI          |
| Rajasthan                          | 0.492           | Low-middle SDI      |
| Sikkim                             | 0.628           | Middle SDI          |
| Tamil Nadu                         | 0.615           | Middle SDI          |
| Telangana                          | 0.575           | Low-middle SDI      |
| Tripura                            | 0.543           | Low-middle SDI      |
| Uttar Pradesh                      | 0.488           | Low-middle SDI      |
| Uttarakhand                        | 0.607           | Middle SDI          |
| West Bengal                        | 0.538           | Low-middle SDI      |
| Union Territories other than Delhi | 0.653           | Middle SDI          |
| Nepal                              | 0.429           | Low SDI             |
| Pakistan                           | 0.492           | Low-middle SDI      |

**Appendix Table 8. Socio-demographic Index groupings by geography, based on 2017 values**

| <b>Geography</b>                       | <b>2017 SDI</b> | <b>SDI Quintile</b> |
|----------------------------------------|-----------------|---------------------|
| Southeast Asia, East Asia, and Oceania | 0.685           |                     |
| East Asia                              | 0.709           |                     |
| China                                  | 0.707           | High-middle SDI     |
| North Korea                            | 0.538           | Low-middle SDI      |
| Taiwan (Province of China)             | 0.864           | High SDI            |
| Oceania                                | 0.471           |                     |
| American Samoa                         | 0.702           | High-middle SDI     |
| Federated States of Micronesia         | 0.575           | Low-middle SDI      |
| Fiji                                   | 0.641           | Middle SDI          |
| Guam                                   | 0.794           | High-middle SDI     |
| Kiribati                               | 0.427           | Low SDI             |
| Marshall Islands                       | 0.55            | Low-middle SDI      |
| Northern Mariana Islands               | 0.758           | High-middle SDI     |
| Papua New Guinea                       | 0.419           | Low SDI             |
| Samoa                                  | 0.576           | Low-middle SDI      |
| Solomon Islands                        | 0.425           | Low SDI             |
| Tonga                                  | 0.625           | Middle SDI          |
| Vanuatu                                | 0.475           | Low-middle SDI      |
| Southeast Asia                         | 0.641           |                     |
| Cambodia                               | 0.482           | Low-middle SDI      |
| Indonesia                              | 0.648           | Middle SDI          |
| Laos                                   | 0.519           | Low-middle SDI      |
| Malaysia                               | 0.759           | High-middle SDI     |
| Maldives                               | 0.655           | Middle SDI          |
| Mauritius                              | 0.72            | High-middle SDI     |
| Myanmar                                | 0.556           | Low-middle SDI      |
| Philippines                            | 0.617           | Middle SDI          |
| Sri Lanka                              | 0.68            | Middle SDI          |
| Seychelles                             | 0.692           | Middle SDI          |
| Thailand                               | 0.684           | Middle SDI          |
| Timor-Leste                            | 0.505           | Low-middle SDI      |
| Vietnam                                | 0.607           | Middle SDI          |
| Sub-Saharan Africa                     | 0.446           |                     |
| Central sub-Saharan Africa             | 0.457           |                     |
| Angola                                 | 0.461           | Low-middle SDI      |
| Central African Republic               | 0.334           | Low SDI             |
| Congo (Brazzaville)                    | 0.574           | Low-middle SDI      |
| DR Congo                               | 0.364           | Low SDI             |
| Equatorial Guinea                      | 0.625           | Middle SDI          |
| Gabon                                  | 0.651           | Middle SDI          |
| Eastern sub-Saharan Africa             | 0.387           |                     |
| Burundi                                | 0.31            | Low SDI             |
| Comoros                                | 0.434           | Low SDI             |
| Djibouti                               | 0.485           | Low-middle SDI      |
| Eritrea                                | 0.409           | Low SDI             |



**Appendix Table 8. Socio-demographic Index groupings by geography, based on 2017 values**

| <b>Geography</b> | <b>2017 SDI</b> | <b>SDI Quintile</b> |
|------------------|-----------------|---------------------|
| Ethiopia         | 0.334           | Low SDI             |
| Kenya            | 0.499           | Low-middle SDI      |
| Baringo          | 0.444           | Low-middle SDI      |
| Bomet            | 0.496           | Low-middle SDI      |
| Bungoma          | 0.463           | Low-middle SDI      |
| Busia            | 0.438           | Low-middle SDI      |
| Elgeyo Marakwet  | 0.496           | Low-middle SDI      |
| Embu             | 0.533           | Low-middle SDI      |
| Garissa          | 0.334           | Low-middle SDI      |
| Homa Bay         | 0.425           | Low-middle SDI      |
| Isiolo           | 0.385           | Low-middle SDI      |
| Kajiado          | 0.534           | Low-middle SDI      |
| Kakamega         | 0.45            | Low-middle SDI      |
| Kericho          | 0.5             | Low-middle SDI      |
| Kiambu           | 0.58            | Low-middle SDI      |
| Kilifi           | 0.456           | Low-middle SDI      |
| Kirinyaga        | 0.533           | Low-middle SDI      |
| Kisii            | 0.522           | Low-middle SDI      |
| Kisumu           | 0.503           | Low-middle SDI      |
| Kitui            | 0.461           | Low-middle SDI      |
| Kwale            | 0.457           | Low-middle SDI      |
| Laikipia         | 0.556           | Low-middle SDI      |
| Lamu             | 0.453           | Low-middle SDI      |
| Machakos         | 0.518           | Low-middle SDI      |
| Makueni          | 0.469           | Low-middle SDI      |
| Mandera          | 0.295           | Low-middle SDI      |
| Marsabit         | 0.34            | Low-middle SDI      |
| Meru             | 0.508           | Low-middle SDI      |
| Migori           | 0.419           | Low-middle SDI      |
| Mombasa          | 0.568           | Low-middle SDI      |
| Murang'a         | 0.528           | Low-middle SDI      |
| Nairobi          | 0.674           | Low-middle SDI      |
| Nakuru           | 0.545           | Low-middle SDI      |
| Nandi            | 0.501           | Low-middle SDI      |
| Narok            | 0.402           | Low-middle SDI      |
| Nyamira          | 0.544           | Low-middle SDI      |
| Nyandarua        | 0.534           | Low-middle SDI      |
| Nyeri            | 0.554           | Low-middle SDI      |
| Samburu          | 0.308           | Low-middle SDI      |
| Siaya            | 0.46            | Low-middle SDI      |
| Taita Taveta     | 0.529           | Low-middle SDI      |
| Tana River       | 0.379           | Low-middle SDI      |
| Tharaka Nithi    | 0.528           | Low-middle SDI      |
| Trans Nzoia      | 0.496           | Low-middle SDI      |
| Turkana          | 0.295           | Low-middle SDI      |

**Appendix Table 8. Socio-demographic Index groupings by geography, based on 2017 values**

| <b>Geography</b>            | <b>2017 SDI</b> | <b>SDI Quintile</b> |
|-----------------------------|-----------------|---------------------|
| Uasin Gishu                 | 0.545           | Low-middle SDI      |
| Vihiga                      | 0.477           | Low-middle SDI      |
| Wajir                       | 0.243           | Low-middle SDI      |
| West Pokot                  | 0.382           | Low-middle SDI      |
| Madagascar                  | 0.331           | Low SDI             |
| Malawi                      | 0.349           | Low SDI             |
| Mozambique                  | 0.34            | Low SDI             |
| Rwanda                      | 0.407           | Low SDI             |
| Somalia                     | 0.235           | Low SDI             |
| South Sudan                 | 0.275           | Low SDI             |
| Tanzania                    | 0.412           | Low SDI             |
| Uganda                      | 0.388           | Low SDI             |
| Zambia                      | 0.472           | Low-middle SDI      |
| Southern sub-Saharan Africa | 0.64            |                     |
| Botswana                    | 0.663           | Middle SDI          |
| Lesotho                     | 0.493           | Low-middle SDI      |
| Namibia                     | 0.616           | Middle SDI          |
| South Africa                | 0.677           | Middle SDI          |
| Swaziland                   | 0.578           | Low-middle SDI      |
| Zimbabwe                    | 0.463           | Low-middle SDI      |
| Western sub-Saharan Africa  | 0.441           |                     |
| Benin                       | 0.373           | Low SDI             |
| Burkina Faso                | 0.284           | Low SDI             |
| Cameroon                    | 0.482           | Low-middle SDI      |
| Cape Verde                  | 0.549           | Low-middle SDI      |
| Chad                        | 0.253           | Low SDI             |
| Cote d'Ivoire               | 0.412           | Low SDI             |
| The Gambia                  | 0.405           | Low SDI             |
| Ghana                       | 0.537           | Low-middle SDI      |
| Guinea                      | 0.325           | Low SDI             |
| Guinea-Bissau               | 0.349           | Low SDI             |
| Liberia                     | 0.328           | Low SDI             |
| Mali                        | 0.267           | Low SDI             |
| Mauritania                  | 0.471           | Low-middle SDI      |
| Niger                       | 0.191           | Low SDI             |
| Nigeria                     | 0.493           | Low-middle SDI      |
| Sao Tome and Principe       | 0.488           | Low-middle SDI      |
| Senegal                     | 0.373           | Low SDI             |
| Sierra Leone                | 0.357           | Low SDI             |
| Togo                        | 0.413           | Low SDI             |

**Appendix Table 9. Socio-demographic Index values for all estimated GBD 2017 locations, 1950-1969**

| Location                                         | 1950  | 1951  | 1952  | 1953  | 1954  | 1955  | 1956  | 1957  | 1958  | 1959  | 1960  | 1961  | 1962  | 1963  | 1964  | 1965  | 1966  | 1967  | 1968  | 1969  |
|--------------------------------------------------|-------|-------|-------|-------|-------|-------|-------|-------|-------|-------|-------|-------|-------|-------|-------|-------|-------|-------|-------|-------|
| Global                                           | 0.359 | 0.361 | 0.364 | 0.366 | 0.368 | 0.371 | 0.372 | 0.373 | 0.374 | 0.376 | 0.378 | 0.381 | 0.385 | 0.389 | 0.393 | 0.398 | 0.402 | 0.406 | 0.411 | 0.417 |
| Central Europe, Eastern Europe, and Central Asia | 0.53  | 0.533 | 0.539 | 0.543 | 0.545 | 0.549 | 0.551 | 0.552 | 0.553 | 0.554 | 0.557 | 0.563 | 0.57  | 0.577 | 0.584 | 0.59  | 0.591 | 0.591 | 0.593 | 0.594 |
| Central Asia                                     | 0.404 | 0.408 | 0.412 | 0.415 | 0.418 | 0.421 | 0.424 | 0.427 | 0.429 | 0.431 | 0.435 | 0.44  | 0.446 | 0.45  | 0.455 | 0.46  | 0.464 | 0.469 | 0.474 | 0.48  |
| Armenia                                          | 0.378 | 0.381 | 0.386 | 0.391 | 0.396 | 0.402 | 0.409 | 0.416 | 0.422 | 0.428 | 0.436 | 0.445 | 0.452 | 0.457 | 0.464 | 0.471 | 0.477 | 0.484 | 0.489 | 0.495 |
| Azerbaijan                                       | 0.381 | 0.384 | 0.39  | 0.395 | 0.4   | 0.406 | 0.413 | 0.419 | 0.425 | 0.43  | 0.436 | 0.444 | 0.451 | 0.456 | 0.465 | 0.473 | 0.481 | 0.488 | 0.496 | 0.503 |
| Georgia                                          | 0.477 | 0.481 | 0.487 | 0.493 | 0.499 | 0.506 | 0.513 | 0.519 | 0.524 | 0.528 | 0.534 | 0.539 | 0.545 | 0.548 | 0.553 | 0.558 | 0.562 | 0.566 | 0.569 | 0.573 |
| Kazakhstan                                       | 0.437 | 0.442 | 0.447 | 0.45  | 0.451 | 0.453 | 0.454 | 0.455 | 0.456 | 0.457 | 0.46  | 0.465 | 0.473 | 0.481 | 0.49  | 0.497 | 0.504 | 0.511 | 0.517 | 0.522 |
| Kyrgyzstan                                       | 0.43  | 0.433 | 0.437 | 0.44  | 0.443 | 0.446 | 0.45  | 0.452 | 0.455 | 0.456 | 0.46  | 0.464 | 0.469 | 0.471 | 0.474 | 0.477 | 0.479 | 0.481 | 0.483 | 0.484 |
| Mongolia                                         | 0.323 | 0.33  | 0.336 | 0.343 | 0.349 | 0.354 | 0.356 | 0.358 | 0.359 | 0.361 | 0.364 | 0.367 | 0.37  | 0.373 | 0.378 | 0.384 | 0.39  | 0.397 | 0.403 | 0.41  |
| Tajikistan                                       | 0.271 | 0.273 | 0.276 | 0.278 | 0.281 | 0.284 | 0.288 | 0.292 | 0.295 | 0.297 | 0.301 | 0.306 | 0.309 | 0.309 | 0.312 | 0.316 | 0.32  | 0.322 | 0.324 | 0.326 |
| Turkmenistan                                     | 0.421 | 0.424 | 0.428 | 0.431 | 0.434 | 0.437 | 0.44  | 0.442 | 0.444 | 0.445 | 0.447 | 0.45  | 0.453 | 0.457 | 0.463 | 0.469 | 0.475 | 0.481 | 0.486 | 0.491 |
| Uzbekistan                                       | 0.331 | 0.332 | 0.334 | 0.336 | 0.337 | 0.338 | 0.34  | 0.341 | 0.343 | 0.344 | 0.347 | 0.352 | 0.355 | 0.358 | 0.362 | 0.367 | 0.371 | 0.376 | 0.38  | 0.384 |
| Central Europe                                   | 0.519 | 0.523 | 0.526 | 0.527 | 0.528 | 0.531 | 0.534 | 0.536 | 0.54  | 0.544 | 0.549 | 0.555 | 0.56  | 0.564 | 0.57  | 0.576 | 0.575 | 0.573 | 0.579 | 0.585 |
| Albania                                          | 0.369 | 0.372 | 0.371 | 0.371 | 0.373 | 0.374 | 0.376 | 0.378 | 0.38  | 0.382 | 0.385 | 0.389 | 0.394 | 0.4   | 0.407 | 0.413 | 0.417 | 0.42  | 0.423 | 0.427 |
| Bosnia and Herzegovina                           | 0.259 | 0.264 | 0.27  | 0.274 | 0.276 | 0.283 | 0.287 | 0.292 | 0.297 | 0.306 | 0.315 | 0.323 | 0.329 | 0.337 | 0.345 | 0.353 | 0.36  | 0.367 | 0.373 | 0.38  |
| Bulgaria                                         | 0.48  | 0.496 | 0.498 | 0.503 | 0.504 | 0.504 | 0.505 | 0.509 | 0.511 | 0.512 | 0.516 | 0.523 | 0.53  | 0.534 | 0.542 | 0.551 | 0.556 | 0.553 | 0.552 | 0.558 |
| Croatia                                          | 0.505 | 0.509 | 0.513 | 0.518 | 0.523 | 0.53  | 0.535 | 0.542 | 0.549 | 0.555 | 0.563 | 0.57  | 0.576 | 0.583 | 0.591 | 0.597 | 0.604 | 0.61  | 0.616 | 0.622 |
| Czech Republic                                   | 0.598 | 0.6   | 0.605 | 0.609 | 0.611 | 0.612 | 0.613 | 0.618 | 0.625 | 0.629 | 0.63  | 0.63  | 0.627 | 0.626 | 0.633 | 0.644 | 0.652 | 0.658 | 0.66  | 0.662 |
| Hungary                                          | 0.516 | 0.521 | 0.521 | 0.515 | 0.513 | 0.518 | 0.525 | 0.532 | 0.538 | 0.544 | 0.55  | 0.558 | 0.566 | 0.57  | 0.574 | 0.575 | 0.573 | 0.572 | 0.576 | 0.582 |
| Macedonia                                        | 0.444 | 0.447 | 0.451 | 0.455 | 0.458 | 0.464 | 0.469 | 0.475 | 0.481 | 0.486 | 0.492 | 0.498 | 0.502 | 0.508 | 0.517 | 0.523 | 0.53  | 0.535 | 0.541 | 0.546 |
| Montenegro                                       | 0.56  | 0.564 | 0.569 | 0.574 | 0.578 | 0.583 | 0.588 | 0.592 | 0.596 | 0.6   | 0.604 | 0.608 | 0.612 | 0.616 | 0.621 | 0.625 | 0.629 | 0.634 | 0.638 | 0.643 |
| Poland                                           | 0.537 | 0.538 | 0.538 | 0.538 | 0.536 | 0.536 | 0.535 | 0.535 | 0.539 | 0.546 | 0.554 | 0.561 | 0.567 | 0.574 | 0.581 | 0.588 | 0.597 | 0.603 | 0.607 | 0.61  |
| Romania                                          | 0.462 | 0.468 | 0.473 | 0.478 | 0.483 | 0.488 | 0.492 | 0.496 | 0.5   | 0.505 | 0.511 | 0.518 | 0.524 | 0.528 | 0.537 | 0.542 | 0.513 | 0.482 | 0.499 | 0.519 |
| Serbia                                           | 0.52  | 0.524 | 0.527 | 0.527 | 0.53  | 0.538 | 0.545 | 0.547 | 0.545 | 0.541 | 0.539 | 0.542 | 0.545 | 0.547 | 0.547 | 0.549 | 0.553 | 0.556 | 0.56  | 0.566 |
| Slovakia                                         | 0.544 | 0.546 | 0.55  | 0.554 | 0.555 | 0.555 | 0.556 | 0.561 | 0.565 | 0.567 | 0.571 | 0.576 | 0.581 | 0.585 | 0.592 | 0.6   | 0.609 | 0.617 | 0.621 | 0.623 |
| Slovenia                                         | 0.571 | 0.578 | 0.584 | 0.589 | 0.594 | 0.597 | 0.601 | 0.606 | 0.611 | 0.615 | 0.619 | 0.621 | 0.622 | 0.623 | 0.623 | 0.626 | 0.631 | 0.638 | 0.645 | 0.648 |
| Eastern Europe                                   | 0.545 | 0.549 | 0.558 | 0.563 | 0.566 | 0.572 | 0.574 | 0.573 | 0.573 | 0.575 | 0.576 | 0.583 | 0.593 | 0.601 | 0.611 | 0.617 | 0.62  | 0.622 | 0.621 | 0.618 |
| Belarus                                          | 0.487 | 0.49  | 0.495 | 0.499 | 0.502 | 0.506 | 0.51  | 0.514 | 0.518 | 0.522 | 0.527 | 0.532 | 0.537 | 0.54  | 0.544 | 0.548 | 0.55  | 0.552 | 0.554 | 0.556 |
| Estonia                                          | 0.606 | 0.61  | 0.615 | 0.621 | 0.626 | 0.631 | 0.637 | 0.64  | 0.644 | 0.646 | 0.649 | 0.654 | 0.66  | 0.665 | 0.669 | 0.671 | 0.672 | 0.672 | 0.67  | 0.669 |
| Latvia                                           | 0.578 | 0.584 | 0.59  | 0.595 | 0.598 | 0.601 | 0.605 | 0.609 | 0.613 | 0.616 | 0.62  | 0.624 | 0.631 | 0.637 | 0.643 | 0.647 | 0.649 | 0.65  | 0.651 | 0.651 |
| Lithuania                                        | 0.565 | 0.572 | 0.581 | 0.589 | 0.597 | 0.606 | 0.614 | 0.619 | 0.624 | 0.627 | 0.631 | 0.636 | 0.643 | 0.649 | 0.653 | 0.656 | 0.658 | 0.659 | 0.659 | 0.658 |
| Moldova                                          | 0.419 | 0.424 | 0.43  | 0.435 | 0.441 | 0.446 | 0.451 | 0.457 | 0.463 | 0.469 | 0.476 | 0.483 | 0.49  | 0.495 | 0.499 | 0.504 | 0.508 | 0.513 | 0.517 | 0.521 |
| Russian Federation                               | 0.555 | 0.559 | 0.57  | 0.575 | 0.578 | 0.585 | 0.586 | 0.584 | 0.582 | 0.582 | 0.582 | 0.589 | 0.602 | 0.612 | 0.624 | 0.632 | 0.635 | 0.635 | 0.632 | 0.628 |
| Ukraine                                          | 0.515 | 0.52  | 0.525 | 0.529 | 0.533 | 0.537 | 0.54  | 0.542 | 0.545 | 0.548 | 0.552 | 0.558 | 0.564 | 0.569 | 0.575 | 0.58  | 0.584 | 0.586 | 0.589 | 0.59  |
| High-income                                      | 0.598 | 0.601 | 0.603 | 0.606 | 0.607 | 0.609 | 0.61  | 0.611 | 0.612 | 0.614 | 0.616 | 0.619 | 0.623 | 0.627 | 0.633 | 0.639 | 0.645 | 0.651 | 0.657 | 0.661 |
| Australasia                                      | 0.621 | 0.616 | 0.612 | 0.612 | 0.611 | 0.609 | 0.607 | 0.606 | 0.606 | 0.607 | 0.608 | 0.612 | 0.621 | 0.633 | 0.642 | 0.649 | 0.654 | 0.656 | 0.658 | 0.661 |
| Australia                                        | 0.628 | 0.622 | 0.618 | 0.617 | 0.616 | 0.614 | 0.612 | 0.611 | 0.611 | 0.613 | 0.614 | 0.618 | 0.626 | 0.636 | 0.647 | 0.654 | 0.659 | 0.66  | 0.662 | 0.665 |
| New Zealand                                      | 0.589 | 0.588 | 0.587 | 0.586 | 0.585 | 0.585 | 0.585 | 0.584 | 0.583 | 0.581 | 0.579 | 0.583 | 0.599 | 0.616 | 0.622 | 0.623 | 0.628 | 0.634 | 0.639 | 0.643 |
| High-income Asia-Pacific                         | 0.532 | 0.543 | 0.551 | 0.558 | 0.563 | 0.569 | 0.575 | 0.58  | 0.582 | 0.587 | 0.594 | 0.602 | 0.608 | 0.615 | 0.619 | 0.628 | 0.635 | 0.639 | 0.65  | 0.658 |
| Brunei                                           | 0.436 | 0.436 | 0.434 | 0.428 | 0.421 | 0.417 | 0.416 | 0.415 | 0.417 | 0.426 | 0.444 | 0.466 | 0.486 | 0.5   | 0.512 | 0.523 | 0.532 | 0.541 | 0.551 | 0.561 |
| Japan                                            | 0.555 | 0.568 | 0.577 | 0.585 | 0.591 | 0.597 | 0.605 | 0.609 | 0.613 | 0.618 | 0.627 | 0.635 | 0.642 | 0.649 | 0.652 | 0.662 | 0.67  | 0.674 | 0.685 | 0.693 |
| Aichi                                            | 0.563 | 0.576 | 0.586 | 0.593 | 0.599 | 0.605 | 0.613 | 0.617 | 0.62  | 0.625 | 0.633 | 0.641 | 0.648 | 0.654 | 0.656 | 0.667 | 0.674 | 0.676 | 0.689 | 0.696 |
| Akita                                            | 0.527 | 0.539 | 0.548 | 0.555 | 0.56  | 0.565 | 0.573 | 0.577 | 0.579 | 0.584 | 0.592 | 0.599 | 0.606 | 0.613 | 0.615 | 0.626 | 0.633 | 0.636 | 0.648 | 0.656 |
| Aomori                                           | 0.517 | 0.53  | 0.54  | 0.547 | 0.553 | 0.558 | 0.566 | 0.57  | 0.572 | 0.577 | 0.585 | 0.593 | 0.6   | 0.606 | 0.608 | 0.619 | 0.626 | 0.629 | 0.641 | 0.648 |
| Chiba                                            | 0.55  | 0.562 | 0.572 | 0.579 | 0.585 | 0.592 | 0.599 | 0.604 | 0.607 | 0.613 | 0.621 | 0.63  | 0.637 | 0.644 | 0.647 | 0.657 | 0.665 | 0.668 | 0.68  | 0.688 |
| Ehime                                            | 0.528 | 0.541 | 0.55  | 0.558 | 0.564 | 0.569 | 0.577 | 0.581 | 0.584 | 0.59  | 0.598 | 0.606 | 0.613 | 0.62  | 0.622 | 0.633 | 0.641 | 0.644 | 0.657 | 0.664 |
| Fukui                                            | 0.532 | 0.545 | 0.555 | 0.562 | 0.568 | 0.574 | 0.581 | 0.586 | 0.588 | 0.593 | 0.601 | 0.609 | 0.616 | 0.622 | 0.624 | 0.635 | 0.643 | 0.645 | 0.658 | 0.666 |
| Fukuoka                                          | 0.55  | 0.562 | 0.572 | 0.579 | 0.585 | 0.591 | 0.599 | 0.603 | 0.607 | 0.612 | 0.62  | 0.629 | 0.636 | 0.643 | 0.647 | 0.657 | 0.665 | 0.669 | 0.681 | 0.688 |
| Fukushima                                        | 0.527 | 0.54  | 0.549 | 0.557 | 0.562 | 0.568 | 0.575 | 0.58  | 0.582 | 0.587 | 0.595 | 0.602 | 0.61  | 0.616 | 0.619 | 0.63  | 0.637 | 0.64  | 0.653 | 0.66  |
| Gifu                                             | 0.535 | 0.547 | 0.556 | 0.564 | 0.569 | 0.575 | 0.583 | 0.587 | 0.59  | 0.596 | 0.604 | 0.612 | 0.619 | 0.625 | 0.628 | 0.639 | 0.646 | 0.649 | 0.661 | 0.669 |
| Gunma                                            | 0.541 | 0.554 | 0.563 | 0.571 | 0.576 | 0.582 | 0.59  | 0.595 | 0.598 | 0.603 | 0.612 | 0.62  | 0.627 | 0.634 | 0.637 | 0.648 | 0.656 | 0.66  | 0.672 | 0.679 |
| Hiroshima                                        | 0.55  | 0.563 | 0.573 | 0.581 | 0.587 | 0.593 | 0.6   | 0.605 | 0.607 | 0.613 | 0.621 | 0.629 | 0.636 | 0.642 | 0.6   |       |       |       |       |       |

**Appendix Table 9. Socio-demographic Index values for all estimated GBD 2017 locations, 1950-1969**

| Location                  | 1950  | 1951  | 1952  | 1953  | 1954  | 1955  | 1956  | 1957  | 1958  | 1959  | 1960  | 1961  | 1962  | 1963  | 1964  | 1965  | 1966  | 1967  | 1968  | 1969  |
|---------------------------|-------|-------|-------|-------|-------|-------|-------|-------|-------|-------|-------|-------|-------|-------|-------|-------|-------|-------|-------|-------|
| Miyazaki                  | 0.515 | 0.528 | 0.538 | 0.545 | 0.551 | 0.556 | 0.564 | 0.568 | 0.571 | 0.576 | 0.584 | 0.592 | 0.599 | 0.606 | 0.608 | 0.619 | 0.627 | 0.63  | 0.642 | 0.65  |
| Nagano                    | 0.55  | 0.56  | 0.569 | 0.576 | 0.581 | 0.587 | 0.594 | 0.599 | 0.603 | 0.609 | 0.617 | 0.625 | 0.632 | 0.64  | 0.644 | 0.654 | 0.662 | 0.667 | 0.678 | 0.686 |
| Nagasaki                  | 0.525 | 0.537 | 0.546 | 0.553 | 0.558 | 0.564 | 0.571 | 0.575 | 0.578 | 0.584 | 0.592 | 0.599 | 0.607 | 0.614 | 0.617 | 0.627 | 0.635 | 0.639 | 0.651 | 0.658 |
| Nara                      | 0.535 | 0.546 | 0.555 | 0.563 | 0.569 | 0.575 | 0.582 | 0.587 | 0.591 | 0.597 | 0.606 | 0.614 | 0.622 | 0.629 | 0.634 | 0.644 | 0.652 | 0.656 | 0.668 | 0.676 |
| Niigata                   | 0.534 | 0.546 | 0.555 | 0.562 | 0.568 | 0.573 | 0.581 | 0.585 | 0.588 | 0.593 | 0.601 | 0.608 | 0.616 | 0.622 | 0.625 | 0.636 | 0.643 | 0.646 | 0.658 | 0.666 |
| Ōita                      | 0.541 | 0.553 | 0.562 | 0.569 | 0.575 | 0.581 | 0.588 | 0.593 | 0.596 | 0.602 | 0.61  | 0.618 | 0.625 | 0.632 | 0.635 | 0.645 | 0.653 | 0.657 | 0.669 | 0.676 |
| Okayama                   | 0.537 | 0.551 | 0.561 | 0.568 | 0.574 | 0.58  | 0.588 | 0.593 | 0.595 | 0.601 | 0.609 | 0.617 | 0.624 | 0.631 | 0.633 | 0.644 | 0.651 | 0.654 | 0.667 | 0.674 |
| Okinawa                   | 0.505 | 0.519 | 0.53  | 0.538 | 0.543 | 0.549 | 0.557 | 0.562 | 0.564 | 0.569 | 0.577 | 0.584 | 0.592 | 0.598 | 0.6   | 0.612 | 0.619 | 0.621 | 0.634 | 0.641 |
| Ōsaka                     | 0.572 | 0.585 | 0.594 | 0.602 | 0.608 | 0.614 | 0.621 | 0.626 | 0.629 | 0.634 | 0.642 | 0.65  | 0.657 | 0.664 | 0.667 | 0.677 | 0.684 | 0.687 | 0.699 | 0.706 |
| Saga                      | 0.527 | 0.539 | 0.548 | 0.555 | 0.561 | 0.566 | 0.574 | 0.579 | 0.582 | 0.587 | 0.595 | 0.603 | 0.611 | 0.618 | 0.621 | 0.632 | 0.64  | 0.644 | 0.656 | 0.664 |
| Saitama                   | 0.543 | 0.555 | 0.564 | 0.572 | 0.578 | 0.584 | 0.591 | 0.596 | 0.6   | 0.605 | 0.614 | 0.622 | 0.629 | 0.636 | 0.639 | 0.649 | 0.657 | 0.66  | 0.672 | 0.68  |
| Shiga                     | 0.552 | 0.565 | 0.574 | 0.582 | 0.588 | 0.594 | 0.602 | 0.606 | 0.609 | 0.615 | 0.623 | 0.631 | 0.638 | 0.645 | 0.648 | 0.659 | 0.667 | 0.67  | 0.682 | 0.69  |
| Shimane                   | 0.518 | 0.53  | 0.54  | 0.547 | 0.553 | 0.558 | 0.566 | 0.57  | 0.573 | 0.579 | 0.587 | 0.594 | 0.602 | 0.609 | 0.612 | 0.623 | 0.63  | 0.634 | 0.646 | 0.654 |
| Shizuoka                  | 0.553 | 0.565 | 0.575 | 0.582 | 0.588 | 0.593 | 0.601 | 0.605 | 0.608 | 0.613 | 0.621 | 0.629 | 0.636 | 0.642 | 0.644 | 0.655 | 0.662 | 0.665 | 0.677 | 0.684 |
| Tochigi                   | 0.543 | 0.556 | 0.565 | 0.573 | 0.579 | 0.584 | 0.592 | 0.596 | 0.599 | 0.604 | 0.612 | 0.62  | 0.627 | 0.634 | 0.637 | 0.648 | 0.655 | 0.659 | 0.671 | 0.678 |
| Tokushima                 | 0.529 | 0.542 | 0.551 | 0.559 | 0.564 | 0.57  | 0.578 | 0.582 | 0.585 | 0.59  | 0.598 | 0.606 | 0.613 | 0.62  | 0.623 | 0.634 | 0.641 | 0.645 | 0.657 | 0.665 |
| Tōkyō                     | 0.642 | 0.652 | 0.661 | 0.667 | 0.673 | 0.678 | 0.685 | 0.69  | 0.694 | 0.699 | 0.707 | 0.714 | 0.721 | 0.728 | 0.732 | 0.74  | 0.747 | 0.752 | 0.762 | 0.77  |
| Tottori                   | 0.521 | 0.534 | 0.543 | 0.551 | 0.557 | 0.563 | 0.57  | 0.575 | 0.578 | 0.584 | 0.592 | 0.6   | 0.607 | 0.614 | 0.617 | 0.628 | 0.636 | 0.64  | 0.652 | 0.66  |
| Toyama                    | 0.541 | 0.554 | 0.563 | 0.571 | 0.576 | 0.582 | 0.59  | 0.594 | 0.596 | 0.601 | 0.609 | 0.617 | 0.624 | 0.63  | 0.632 | 0.643 | 0.65  | 0.652 | 0.665 | 0.672 |
| Wakayama                  | 0.524 | 0.538 | 0.547 | 0.555 | 0.561 | 0.567 | 0.575 | 0.58  | 0.582 | 0.588 | 0.596 | 0.604 | 0.611 | 0.618 | 0.62  | 0.631 | 0.639 | 0.642 | 0.655 | 0.662 |
| Yamagata                  | 0.524 | 0.536 | 0.545 | 0.552 | 0.557 | 0.563 | 0.57  | 0.575 | 0.577 | 0.582 | 0.59  | 0.598 | 0.605 | 0.612 | 0.615 | 0.626 | 0.634 | 0.637 | 0.649 | 0.657 |
| Yamaguchi                 | 0.545 | 0.558 | 0.567 | 0.575 | 0.581 | 0.586 | 0.594 | 0.599 | 0.601 | 0.607 | 0.615 | 0.623 | 0.63  | 0.637 | 0.639 | 0.65  | 0.658 | 0.661 | 0.673 | 0.681 |
| Yamanashi                 | 0.55  | 0.56  | 0.569 | 0.576 | 0.581 | 0.587 | 0.594 | 0.599 | 0.603 | 0.609 | 0.617 | 0.625 | 0.632 | 0.64  | 0.644 | 0.654 | 0.662 | 0.667 | 0.678 | 0.686 |
| South Korea               | 0.39  | 0.389 | 0.392 | 0.401 | 0.408 | 0.414 | 0.418 | 0.423 | 0.427 | 0.431 | 0.435 | 0.438 | 0.442 | 0.445 | 0.448 | 0.451 | 0.457 | 0.464 | 0.472 | 0.482 |
| Singapore                 | 0.419 | 0.414 | 0.406 | 0.403 | 0.407 | 0.412 | 0.416 | 0.422 | 0.428 | 0.443 | 0.458 | 0.467 | 0.476 | 0.486 | 0.499 | 0.509 | 0.518 | 0.533 | 0.548 | 0.559 |
| High-income North America | 0.619 | 0.614 | 0.612 | 0.607 | 0.603 | 0.598 | 0.59  | 0.59  | 0.592 | 0.593 | 0.596 | 0.603 | 0.617 | 0.63  | 0.647 | 0.662 | 0.673 | 0.685 | 0.692 | 0.695 |
| Canada                    | 0.632 | 0.627 | 0.622 | 0.617 | 0.615 | 0.614 | 0.611 | 0.608 | 0.608 | 0.608 | 0.612 | 0.617 | 0.624 | 0.633 | 0.647 | 0.663 | 0.673 | 0.681 | 0.689 | 0.694 |
| Greenland                 | 0.48  | 0.487 | 0.49  | 0.488 | 0.483 | 0.479 | 0.476 | 0.473 | 0.469 | 0.465 | 0.461 | 0.459 | 0.457 | 0.451 | 0.444 | 0.445 | 0.458 | 0.481 | 0.512 | 0.543 |
| USA                       | 0.617 | 0.612 | 0.611 | 0.606 | 0.601 | 0.596 | 0.587 | 0.588 | 0.59  | 0.591 | 0.593 | 0.601 | 0.616 | 0.629 | 0.646 | 0.662 | 0.673 | 0.685 | 0.692 | 0.695 |
| Alabama                   | 0.543 | 0.537 | 0.536 | 0.529 | 0.523 | 0.517 | 0.506 | 0.507 | 0.511 | 0.513 | 0.517 | 0.528 | 0.547 | 0.563 | 0.584 | 0.603 | 0.615 | 0.629 | 0.637 | 0.638 |
| Alaska                    | 0.609 | 0.601 | 0.599 | 0.588 | 0.578 | 0.565 | 0.544 | 0.54  | 0.539 | 0.535 | 0.535 | 0.545 | 0.568 | 0.587 | 0.614 | 0.637 | 0.652 | 0.669 | 0.679 | 0.68  |
| Arizona                   | 0.592 | 0.586 | 0.585 | 0.577 | 0.57  | 0.562 | 0.55  | 0.55  | 0.552 | 0.553 | 0.557 | 0.568 | 0.588 | 0.604 | 0.626 | 0.645 | 0.657 | 0.67  | 0.677 | 0.677 |
| Arkansas                  | 0.529 | 0.522 | 0.52  | 0.511 | 0.504 | 0.497 | 0.484 | 0.484 | 0.487 | 0.489 | 0.493 | 0.505 | 0.526 | 0.544 | 0.567 | 0.587 | 0.601 | 0.617 | 0.626 | 0.627 |
| California                | 0.649 | 0.644 | 0.644 | 0.639 | 0.635 | 0.63  | 0.621 | 0.621 | 0.623 | 0.623 | 0.625 | 0.632 | 0.645 | 0.657 | 0.674 | 0.689 | 0.699 | 0.711 | 0.719 | 0.723 |
| Colorado                  | 0.64  | 0.636 | 0.636 | 0.63  | 0.625 | 0.62  | 0.611 | 0.611 | 0.612 | 0.612 | 0.614 | 0.621 | 0.635 | 0.647 | 0.664 | 0.679 | 0.69  | 0.702 | 0.71  | 0.713 |
| Connecticut               | 0.672 | 0.669 | 0.669 | 0.666 | 0.663 | 0.66  | 0.654 | 0.653 | 0.653 | 0.653 | 0.654 | 0.658 | 0.668 | 0.677 | 0.691 | 0.704 | 0.714 | 0.726 | 0.734 | 0.74  |
| Delaware                  | 0.647 | 0.64  | 0.639 | 0.632 | 0.627 | 0.622 | 0.613 | 0.612 | 0.613 | 0.612 | 0.613 | 0.619 | 0.633 | 0.645 | 0.662 | 0.678 | 0.688 | 0.701 | 0.71  | 0.713 |
| Washington, DC            | 0.663 | 0.657 | 0.654 | 0.647 | 0.641 | 0.633 | 0.621 | 0.62  | 0.621 | 0.62  | 0.62  | 0.627 | 0.643 | 0.657 | 0.674 | 0.69  | 0.702 | 0.716 | 0.727 | 0.73  |
| Florida                   | 0.604 | 0.596 | 0.596 | 0.59  | 0.585 | 0.58  | 0.57  | 0.572 | 0.575 | 0.578 | 0.581 | 0.591 | 0.607 | 0.621 | 0.639 | 0.654 | 0.664 | 0.675 | 0.681 | 0.68  |
| Georgia                   | 0.553 | 0.547 | 0.546 | 0.539 | 0.534 | 0.528 | 0.517 | 0.518 | 0.522 | 0.524 | 0.528 | 0.539 | 0.558 | 0.574 | 0.594 | 0.612 | 0.624 | 0.638 | 0.645 | 0.645 |
| Hawaii                    | 0.621 | 0.616 | 0.616 | 0.61  | 0.605 | 0.599 | 0.589 | 0.588 | 0.589 | 0.59  | 0.594 | 0.603 | 0.619 | 0.634 | 0.654 | 0.672 | 0.684 | 0.699 | 0.708 | 0.711 |
| Idaho                     | 0.588 | 0.579 | 0.577 | 0.567 | 0.558 | 0.547 | 0.532 | 0.53  | 0.53  | 0.528 | 0.53  | 0.54  | 0.56  | 0.578 | 0.602 | 0.624 | 0.638 | 0.654 | 0.663 | 0.665 |
| Illinois                  | 0.629 | 0.624 | 0.623 | 0.618 | 0.615 | 0.61  | 0.602 | 0.603 | 0.605 | 0.607 | 0.61  | 0.618 | 0.633 | 0.645 | 0.662 | 0.677 | 0.687 | 0.698 | 0.704 | 0.704 |
| Indiana                   | 0.608 | 0.603 | 0.602 | 0.596 | 0.591 | 0.585 | 0.575 | 0.575 | 0.577 | 0.577 | 0.58  | 0.588 | 0.604 | 0.617 | 0.636 | 0.652 | 0.663 | 0.674 | 0.681 | 0.681 |
| Iowa                      | 0.633 | 0.627 | 0.626 | 0.619 | 0.614 | 0.607 | 0.596 | 0.595 | 0.595 | 0.593 | 0.594 | 0.599 | 0.612 | 0.623 | 0.641 | 0.657 | 0.669 | 0.682 | 0.691 | 0.696 |
| Kansas                    | 0.625 | 0.619 | 0.619 | 0.613 | 0.608 | 0.601 | 0.59  | 0.588 | 0.589 | 0.588 | 0.589 | 0.596 | 0.61  | 0.623 | 0.641 | 0.658 | 0.67  | 0.684 | 0.693 | 0.698 |
| Kentucky                  | 0.551 | 0.546 | 0.546 | 0.539 | 0.534 | 0.528 | 0.518 | 0.519 | 0.522 | 0.524 | 0.527 | 0.537 | 0.555 | 0.571 | 0.59  | 0.608 | 0.62  | 0.633 | 0.641 | 0.642 |
| Louisiana                 | 0.545 | 0.537 | 0.535 | 0.527 | 0.519 | 0.51  | 0.496 | 0.495 | 0.496 | 0.495 | 0.497 | 0.505 | 0.524 | 0.541 | 0.564 | 0.584 | 0.599 | 0.616 | 0.628 | 0.633 |
| Maine                     | 0.6   | 0.593 | 0.592 | 0.585 | 0.579 | 0.573 | 0.562 | 0.561 | 0.562 | 0.561 | 0.563 | 0.571 | 0.587 | 0.601 | 0.62  | 0.638 | 0.65  | 0.663 | 0.671 | 0.673 |
| Maryland                  | 0.641 | 0.636 | 0.636 | 0.632 | 0.627 | 0.622 | 0.614 | 0.614 | 0.615 | 0.615 | 0.617 | 0.623 | 0.636 | 0.647 | 0.663 | 0.678 | 0.689 | 0.702 | 0.711 | 0.717 |
| Massachusetts             | 0.676 | 0.673 | 0.673 | 0.67  | 0.668 | 0.665 | 0.66  | 0.66  | 0.661 | 0.662 | 0.664 | 0.67  | 0.679 | 0.688 | 0.701 | 0.713 | 0.721 | 0.731 | 0.738 | 0.742 |
| Michigan                  | 0.627 | 0.622 | 0.621 | 0.616 | 0.612 | 0.607 | 0.597 | 0.597 | 0.597 | 0.597 | 0.598 | 0.604 | 0.617 | 0.629 | 0.646 | 0.662 | 0.672 | 0.684 | 0.691 | 0.693 |
| Minnesota                 | 0.645 | 0.641 | 0.64  | 0.635 | 0.632 | 0.627 | 0.62  | 0.619 | 0.619 | 0.619 | 0.62  | 0.626 | 0.637 | 0.648 | 0.663 | 0.678 | 0.689 | 0.702 | 0.711 | 0.717 |
| Mississippi               | 0.51  | 0.5   | 0.498 | 0.488 | 0.48  | 0.471 | 0.456 | 0.455 | 0.457 | 0.458 | 0.462 | 0.474 | 0.497 | 0.516 | 0.541 | 0.562 | 0.576 | 0.592 | 0.602 | 0.602 |
| Missouri                  | 0.601 | 0.595 | 0.594 | 0.588 | 0.584 | 0.578 | 0.569 | 0.569 | 0.571 | 0.572 | 0.574 | 0.582 | 0.598 | 0.612 | 0.63  | 0.647 | 0.658 | 0.671 | 0.68  | 0.683 |
| Montana                   | 0.621 | 0.614 | 0.611 | 0.604 | 0.597 | 0.59  | 0.578 | 0.577 | 0.578 | 0.577 | 0.579 | 0.587 | 0.603 | 0.618 | 0.637 | 0.655 | 0.667 | 0.68  | 0.687 | 0.687 |
| Nebraska                  | 0.634 | 0.626 | 0.625 | 0.618 | 0.613 | 0.607 | 0.596 | 0.596 | 0.597 | 0.596 | 0.598 | 0.605 | 0.619 | 0.632 | 0.649 | 0.666 | 0.677 | 0.69  | 0.698 | 0.701 |
| Nevada                    | 0.627 | 0.619 | 0.618 | 0.611 | 0.604 | 0.597 | 0.583 | 0.    |       |       |       |       |       |       |       |       |       |       |       |       |

**Appendix Table 9. Socio-demographic Index values for all estimated GBD 2017 locations, 1950-1969**

| Location                | 1950  | 1951  | 1952  | 1953  | 1954  | 1955  | 1956  | 1957  | 1958  | 1959  | 1960  | 1961  | 1962  | 1963  | 1964  | 1965  | 1966  | 1967  | 1968  | 1969  |
|-------------------------|-------|-------|-------|-------|-------|-------|-------|-------|-------|-------|-------|-------|-------|-------|-------|-------|-------|-------|-------|-------|
| Oklahoma                | 0.575 | 0.569 | 0.568 | 0.561 | 0.556 | 0.549 | 0.538 | 0.538 | 0.541 | 0.542 | 0.545 | 0.556 | 0.574 | 0.59  | 0.611 | 0.629 | 0.641 | 0.655 | 0.664 | 0.666 |
| Oregon                  | 0.645 | 0.639 | 0.638 | 0.632 | 0.627 | 0.621 | 0.611 | 0.609 | 0.609 | 0.608 | 0.609 | 0.615 | 0.628 | 0.639 | 0.657 | 0.673 | 0.684 | 0.698 | 0.707 | 0.712 |
| Pennsylvania            | 0.636 | 0.632 | 0.632 | 0.629 | 0.626 | 0.622 | 0.617 | 0.618 | 0.621 | 0.622 | 0.626 | 0.633 | 0.645 | 0.656 | 0.67  | 0.683 | 0.691 | 0.701 | 0.706 | 0.706 |
| Rhode Island            | 0.642 | 0.638 | 0.637 | 0.633 | 0.629 | 0.625 | 0.617 | 0.617 | 0.617 | 0.617 | 0.618 | 0.624 | 0.635 | 0.646 | 0.661 | 0.675 | 0.686 | 0.698 | 0.706 | 0.71  |
| South Carolina          | 0.545 | 0.54  | 0.54  | 0.533 | 0.526 | 0.518 | 0.506 | 0.505 | 0.508 | 0.509 | 0.512 | 0.523 | 0.542 | 0.558 | 0.58  | 0.599 | 0.613 | 0.628 | 0.637 | 0.639 |
| South Dakota            | 0.601 | 0.596 | 0.592 | 0.584 | 0.579 | 0.57  | 0.559 | 0.559 | 0.559 | 0.56  | 0.559 | 0.562 | 0.571 | 0.588 | 0.603 | 0.622 | 0.641 | 0.653 | 0.667 | 0.678 |
| Tennessee               | 0.563 | 0.557 | 0.556 | 0.55  | 0.545 | 0.54  | 0.53  | 0.531 | 0.534 | 0.536 | 0.539 | 0.549 | 0.566 | 0.58  | 0.599 | 0.616 | 0.628 | 0.642 | 0.651 | 0.653 |
| Texas                   | 0.572 | 0.565 | 0.564 | 0.555 | 0.549 | 0.541 | 0.528 | 0.528 | 0.53  | 0.53  | 0.532 | 0.542 | 0.56  | 0.576 | 0.597 | 0.616 | 0.629 | 0.643 | 0.652 | 0.655 |
| Utah                    | 0.608 | 0.6   | 0.598 | 0.589 | 0.581 | 0.573 | 0.56  | 0.559 | 0.56  | 0.559 | 0.563 | 0.574 | 0.593 | 0.61  | 0.634 | 0.654 | 0.667 | 0.682 | 0.69  | 0.689 |
| Vermont                 | 0.627 | 0.623 | 0.622 | 0.617 | 0.612 | 0.607 | 0.598 | 0.598 | 0.598 | 0.598 | 0.6   | 0.607 | 0.62  | 0.631 | 0.648 | 0.664 | 0.675 | 0.688 | 0.697 | 0.7   |
| Virginia                | 0.607 | 0.603 | 0.603 | 0.597 | 0.593 | 0.588 | 0.579 | 0.58  | 0.582 | 0.583 | 0.586 | 0.594 | 0.609 | 0.622 | 0.64  | 0.656 | 0.667 | 0.68  | 0.689 | 0.692 |
| Washington              | 0.655 | 0.648 | 0.647 | 0.641 | 0.636 | 0.629 | 0.618 | 0.616 | 0.615 | 0.613 | 0.612 | 0.617 | 0.629 | 0.64  | 0.657 | 0.673 | 0.684 | 0.699 | 0.71  | 0.718 |
| West Virginia           | 0.569 | 0.563 | 0.562 | 0.555 | 0.55  | 0.544 | 0.534 | 0.535 | 0.538 | 0.54  | 0.544 | 0.553 | 0.569 | 0.584 | 0.603 | 0.62  | 0.631 | 0.644 | 0.651 | 0.65  |
| Wisconsin               | 0.638 | 0.634 | 0.634 | 0.629 | 0.624 | 0.619 | 0.612 | 0.611 | 0.612 | 0.611 | 0.613 | 0.619 | 0.63  | 0.64  | 0.656 | 0.671 | 0.681 | 0.693 | 0.701 | 0.705 |
| Wyoming                 | 0.609 | 0.6   | 0.597 | 0.587 | 0.578 | 0.569 | 0.554 | 0.552 | 0.552 | 0.55  | 0.551 | 0.56  | 0.579 | 0.596 | 0.619 | 0.639 | 0.651 | 0.666 | 0.676 | 0.678 |
| Southern Latin America  | 0.464 | 0.468 | 0.47  | 0.472 | 0.474 | 0.475 | 0.477 | 0.481 | 0.485 | 0.486 | 0.489 | 0.492 | 0.494 | 0.496 | 0.501 | 0.507 | 0.513 | 0.517 | 0.516 | 0.517 |
| Argentina               | 0.472 | 0.475 | 0.477 | 0.479 | 0.482 | 0.485 | 0.488 | 0.492 | 0.497 | 0.501 | 0.504 | 0.506 | 0.508 | 0.51  | 0.515 | 0.521 | 0.527 | 0.53  | 0.525 | 0.524 |
| Chile                   | 0.436 | 0.441 | 0.443 | 0.445 | 0.446 | 0.445 | 0.443 | 0.446 | 0.449 | 0.446 | 0.448 | 0.455 | 0.456 | 0.458 | 0.464 | 0.471 | 0.477 | 0.485 | 0.494 | 0.498 |
| Uruguay                 | 0.479 | 0.484 | 0.484 | 0.484 | 0.484 | 0.483 | 0.484 | 0.487 | 0.489 | 0.49  | 0.49  | 0.491 | 0.495 | 0.5   | 0.504 | 0.507 | 0.511 | 0.514 | 0.514 | 0.515 |
| Western Europe          | 0.597 | 0.6   | 0.602 | 0.605 | 0.607 | 0.609 | 0.61  | 0.612 | 0.613 | 0.614 | 0.615 | 0.616 | 0.617 | 0.619 | 0.622 | 0.624 | 0.629 | 0.634 | 0.637 | 0.643 |
| Andorra                 | 0.721 | 0.724 | 0.728 | 0.733 | 0.737 | 0.741 | 0.745 | 0.75  | 0.754 | 0.758 | 0.762 | 0.767 | 0.771 | 0.776 | 0.781 | 0.786 | 0.79  | 0.794 | 0.798 | 0.801 |
| Austria                 | 0.651 | 0.654 | 0.654 | 0.656 | 0.656 | 0.655 | 0.654 | 0.653 | 0.652 | 0.647 | 0.645 | 0.649 | 0.652 | 0.655 | 0.658 | 0.659 | 0.658 | 0.657 | 0.659 | 0.665 |
| Belgium                 | 0.657 | 0.659 | 0.66  | 0.66  | 0.66  | 0.66  | 0.66  | 0.66  | 0.66  | 0.66  | 0.66  | 0.66  | 0.66  | 0.661 | 0.665 | 0.67  | 0.676 | 0.682 | 0.686 | 0.689 |
| Cyprus                  | 0.544 | 0.55  | 0.556 | 0.561 | 0.563 | 0.562 | 0.561 | 0.561 | 0.562 | 0.564 | 0.567 | 0.571 | 0.575 | 0.579 | 0.581 | 0.584 | 0.587 | 0.591 | 0.595 | 0.6   |
| Denmark                 | 0.693 | 0.692 | 0.689 | 0.688 | 0.688 | 0.688 | 0.689 | 0.691 | 0.694 | 0.697 | 0.7   | 0.701 | 0.702 | 0.704 | 0.705 | 0.706 | 0.714 | 0.73  | 0.744 | 0.753 |
| Finland                 | 0.633 | 0.637 | 0.637 | 0.637 | 0.638 | 0.64  | 0.643 | 0.648 | 0.652 | 0.653 | 0.656 | 0.658 | 0.659 | 0.663 | 0.671 | 0.678 | 0.682 | 0.688 | 0.697 | 0.707 |
| France                  | 0.561 | 0.564 | 0.567 | 0.569 | 0.571 | 0.574 | 0.577 | 0.58  | 0.58  | 0.581 | 0.582 | 0.584 | 0.583 | 0.582 | 0.585 | 0.589 | 0.595 | 0.603 | 0.61  | 0.615 |
| Germany                 | 0.615 | 0.62  | 0.623 | 0.631 | 0.638 | 0.642 | 0.644 | 0.647 | 0.648 | 0.649 | 0.65  | 0.651 | 0.652 | 0.655 | 0.659 | 0.662 | 0.667 | 0.674 | 0.672 | 0.68  |
| Greece                  | 0.55  | 0.553 | 0.554 | 0.556 | 0.559 | 0.563 | 0.568 | 0.571 | 0.572 | 0.574 | 0.578 | 0.581 | 0.582 | 0.583 | 0.583 | 0.582 | 0.579 | 0.576 | 0.58  | 0.588 |
| Iceland                 | 0.629 | 0.627 | 0.623 | 0.62  | 0.618 | 0.617 | 0.617 | 0.62  | 0.627 | 0.635 | 0.636 | 0.632 | 0.629 | 0.628 | 0.631 | 0.639 | 0.651 | 0.664 | 0.674 | 0.68  |
| Ireland                 | 0.609 | 0.611 | 0.615 | 0.62  | 0.623 | 0.626 | 0.628 | 0.629 | 0.629 | 0.629 | 0.629 | 0.628 | 0.628 | 0.629 | 0.631 | 0.634 | 0.637 | 0.639 | 0.641 | 0.648 |
| Israel                  | 0.525 | 0.526 | 0.527 | 0.531 | 0.533 | 0.536 | 0.542 | 0.551 | 0.561 | 0.566 | 0.571 | 0.578 | 0.583 | 0.587 | 0.592 | 0.6   | 0.61  | 0.619 | 0.623 | 0.624 |
| Italy                   | 0.578 | 0.583 | 0.587 | 0.588 | 0.59  | 0.592 | 0.595 | 0.598 | 0.601 | 0.604 | 0.607 | 0.609 | 0.611 | 0.617 | 0.619 | 0.617 | 0.621 | 0.625 | 0.629 | 0.633 |
| Luxembourg              | 0.706 | 0.71  | 0.712 | 0.711 | 0.71  | 0.709 | 0.71  | 0.71  | 0.711 | 0.712 | 0.713 | 0.714 | 0.715 | 0.715 | 0.717 | 0.719 | 0.721 | 0.725 | 0.729 | 0.735 |
| Malta                   | 0.494 | 0.501 | 0.508 | 0.515 | 0.522 | 0.526 | 0.53  | 0.532 | 0.534 | 0.536 | 0.542 | 0.55  | 0.56  | 0.571 | 0.583 | 0.594 | 0.602 | 0.608 | 0.613 | 0.618 |
| Netherlands             | 0.683 | 0.683 | 0.685 | 0.688 | 0.689 | 0.691 | 0.692 | 0.692 | 0.691 | 0.691 | 0.692 | 0.692 | 0.692 | 0.692 | 0.694 | 0.696 | 0.698 | 0.702 | 0.705 | 0.71  |
| Norway                  | 0.684 | 0.684 | 0.68  | 0.677 | 0.674 | 0.672 | 0.67  | 0.67  | 0.67  | 0.67  | 0.668 | 0.667 | 0.668 | 0.669 | 0.67  | 0.673 | 0.675 | 0.677 | 0.68  | 0.684 |
| Portugal                | 0.454 | 0.456 | 0.458 | 0.461 | 0.462 | 0.463 | 0.464 | 0.466 | 0.467 | 0.468 | 0.469 | 0.47  | 0.474 | 0.478 | 0.481 | 0.485 | 0.488 | 0.493 | 0.5   | 0.507 |
| Spain                   | 0.533 | 0.536 | 0.537 | 0.537 | 0.537 | 0.537 | 0.537 | 0.538 | 0.54  | 0.543 | 0.547 | 0.55  | 0.553 | 0.555 | 0.558 | 0.563 | 0.568 | 0.57  | 0.572 | 0.577 |
| Sweden                  | 0.645 | 0.647 | 0.647 | 0.648 | 0.649 | 0.65  | 0.652 | 0.656 | 0.66  | 0.664 | 0.668 | 0.669 | 0.67  | 0.669 | 0.67  | 0.673 | 0.678 | 0.687 | 0.697 | 0.702 |
| Stockholm               | 0.697 | 0.699 | 0.699 | 0.701 | 0.702 | 0.703 | 0.706 | 0.71  | 0.714 | 0.719 | 0.722 | 0.724 | 0.726 | 0.726 | 0.728 | 0.73  | 0.734 | 0.741 | 0.748 | 0.75  |
| Sweden except Stockholm | 0.634 | 0.636 | 0.636 | 0.637 | 0.638 | 0.638 | 0.64  | 0.644 | 0.648 | 0.652 | 0.655 | 0.657 | 0.657 | 0.656 | 0.656 | 0.659 | 0.664 | 0.674 | 0.684 | 0.69  |
| Switzerland             | 0.761 | 0.765 | 0.766 | 0.767 | 0.768 | 0.768 | 0.768 | 0.768 | 0.768 | 0.769 | 0.768 | 0.766 | 0.763 | 0.761 | 0.763 | 0.767 | 0.771 | 0.774 | 0.778 | 0.781 |
| United Kingdom          | 0.572 | 0.574 | 0.575 | 0.576 | 0.576 | 0.576 | 0.575 | 0.574 | 0.573 | 0.571 | 0.57  | 0.569 | 0.568 | 0.569 | 0.572 | 0.576 | 0.581 | 0.587 | 0.593 | 0.599 |
| England                 | 0.587 | 0.589 | 0.59  | 0.591 | 0.592 | 0.591 | 0.59  | 0.588 | 0.587 | 0.585 | 0.584 | 0.582 | 0.582 | 0.582 | 0.585 | 0.589 | 0.594 | 0.6   | 0.606 | 0.611 |
| East Midlands           | 0.552 | 0.555 | 0.556 | 0.557 | 0.558 | 0.558 | 0.557 | 0.556 | 0.555 | 0.554 | 0.553 | 0.552 | 0.551 | 0.553 | 0.555 | 0.56  | 0.565 | 0.571 | 0.577 | 0.583 |
| Derby                   | 0.559 | 0.561 | 0.562 | 0.563 | 0.564 | 0.563 | 0.562 | 0.561 | 0.559 | 0.557 | 0.556 | 0.554 | 0.553 | 0.554 | 0.557 | 0.561 | 0.566 | 0.572 | 0.578 | 0.584 |
| Derbyshire              | 0.542 | 0.545 | 0.546 | 0.547 | 0.548 | 0.548 | 0.547 | 0.546 | 0.545 | 0.544 | 0.543 | 0.542 | 0.542 | 0.543 | 0.546 | 0.55  | 0.556 | 0.562 | 0.568 | 0.574 |
| Leicester               | 0.54  | 0.542 | 0.543 | 0.545 | 0.545 | 0.545 | 0.544 | 0.543 | 0.542 | 0.541 | 0.539 | 0.538 | 0.538 | 0.539 | 0.542 | 0.546 | 0.552 | 0.558 | 0.564 | 0.57  |
| Leicestershire          | 0.57  | 0.572 | 0.573 | 0.574 | 0.575 | 0.575 | 0.575 | 0.574 | 0.573 | 0.572 | 0.571 | 0.571 | 0.571 | 0.572 | 0.575 | 0.579 | 0.585 | 0.591 | 0.597 | 0.603 |
| Lincolnshire            | 0.546 | 0.548 | 0.549 | 0.55  | 0.551 | 0.551 | 0.55  | 0.549 | 0.548 | 0.547 | 0.546 | 0.545 | 0.545 | 0.546 | 0.549 | 0.553 | 0.558 | 0.564 | 0.571 | 0.577 |
| Northamptonshire        | 0.555 | 0.557 | 0.558 | 0.559 | 0.56  | 0.56  | 0.559 | 0.558 | 0.557 | 0.556 | 0.554 | 0.553 | 0.553 | 0.554 | 0.557 | 0.561 | 0.567 | 0.573 | 0.579 | 0.585 |
| Nottingham              | 0.568 | 0.57  | 0.571 | 0.572 | 0.573 | 0.573 | 0.572 | 0.572 | 0.571 | 0.57  | 0.569 | 0.568 | 0.568 | 0.569 | 0.572 | 0.577 | 0.582 | 0.588 | 0.594 | 0.6   |
| Nottinghamshire         | 0.541 | 0.543 | 0.544 | 0.546 | 0.546 | 0.546 | 0.546 | 0.545 | 0.544 | 0.543 | 0.541 | 0.541 | 0.541 | 0.542 | 0.545 | 0.549 | 0.554 | 0.56  | 0.566 | 0.572 |
| Rutland                 | 0.57  | 0.573 | 0.574 | 0.575 | 0.576 | 0.576 | 0.575 | 0.574 | 0.573 | 0.572 | 0.571 | 0.57  | 0.57  | 0.571 | 0.574 | 0.579 | 0.584 | 0.59  | 0.596 | 0.602 |
| East of England         | 0.567 | 0.57  | 0.571 | 0.572 | 0.573 | 0.573 | 0.572 | 0.572 | 0.571 | 0.57  | 0.568 | 0.568 | 0.568 | 0.569 | 0.572 | 0.576 | 0.581 | 0.587 | 0.594 | 0.6   |
| Bedford                 | 0.57  | 0.573 | 0.574 | 0.575 | 0.576 | 0.576 | 0.575 | 0.574 | 0.573 | 0.572 | 0.571 | 0.57  | 0.569 | 0.571 | 0.573 | 0.578 | 0.583 | 0.589 | 0.595 | 0.601 |
| Cambridgeshire          | 0.589 | 0.592 | 0.593 | 0.594 | 0.595 | 0.595 | 0.595 | 0.594 | 0.594 | 0.593 | 0.593 | 0     |       |       |       |       |       |       |       |       |

**Appendix Table 9. Socio-demographic Index values for all estimated GBD 2017 locations, 1950-1969**

| Location                  | 1950  | 1951  | 1952  | 1953  | 1954  | 1955   | 1956  | 1957  | 1958  | 1959  | 1960  | 1961  | 1962  | 1963  | 1964  | 1965  | 1966  | 1967  | 1968  | 1969  |
|---------------------------|-------|-------|-------|-------|-------|--------|-------|-------|-------|-------|-------|-------|-------|-------|-------|-------|-------|-------|-------|-------|
| Suffolk                   | 0.556 | 0.559 | 0.56  | 0.561 | 0.562 | 0.562  | 0.561 | 0.56  | 0.559 | 0.557 | 0.556 | 0.555 | 0.554 | 0.555 | 0.558 | 0.562 | 0.568 | 0.574 | 0.58  | 0.586 |
| Thurrock                  | 0.56  | 0.562 | 0.563 | 0.564 | 0.564 | 0.564  | 0.563 | 0.562 | 0.561 | 0.559 | 0.558 | 0.557 | 0.556 | 0.557 | 0.56  | 0.564 | 0.57  | 0.576 | 0.582 | 0.588 |
| Greater London            | 0.635 | 0.638 | 0.639 | 0.639 | 0.64  | 0.64   | 0.638 | 0.637 | 0.636 | 0.634 | 0.633 | 0.631 | 0.631 | 0.632 | 0.634 | 0.638 | 0.643 | 0.648 | 0.653 | 0.659 |
| Barking and Dagenham      | 0.564 | 0.566 | 0.567 | 0.567 | 0.568 | 0.567  | 0.566 | 0.565 | 0.563 | 0.561 | 0.559 | 0.558 | 0.557 | 0.557 | 0.56  | 0.564 | 0.568 | 0.574 | 0.58  | 0.586 |
| Barnet                    | 0.609 | 0.611 | 0.612 | 0.613 | 0.614 | 0.614  | 0.613 | 0.613 | 0.612 | 0.611 | 0.61  | 0.609 | 0.609 | 0.61  | 0.612 | 0.616 | 0.621 | 0.626 | 0.632 | 0.637 |
| Bexley                    | 0.574 | 0.577 | 0.578 | 0.579 | 0.58  | 0.58   | 0.579 | 0.578 | 0.577 | 0.576 | 0.575 | 0.575 | 0.574 | 0.575 | 0.578 | 0.582 | 0.587 | 0.593 | 0.598 | 0.604 |
| Brent                     | 0.597 | 0.599 | 0.6   | 0.601 | 0.602 | 0.602  | 0.601 | 0.6   | 0.599 | 0.597 | 0.596 | 0.595 | 0.594 | 0.595 | 0.598 | 0.602 | 0.607 | 0.613 | 0.618 | 0.624 |
| Bromley                   | 0.606 | 0.608 | 0.609 | 0.611 | 0.611 | 0.611  | 0.611 | 0.61  | 0.609 | 0.608 | 0.607 | 0.606 | 0.606 | 0.607 | 0.609 | 0.613 | 0.618 | 0.624 | 0.629 | 0.635 |
| Camden                    | 0.709 | 0.712 | 0.713 | 0.714 | 0.715 | 0.715  | 0.715 | 0.715 | 0.714 | 0.714 | 0.714 | 0.713 | 0.714 | 0.715 | 0.718 | 0.722 | 0.726 | 0.731 | 0.735 | 0.739 |
| Croydon                   | 0.591 | 0.593 | 0.594 | 0.596 | 0.596 | 0.596  | 0.595 | 0.594 | 0.592 | 0.591 | 0.589 | 0.588 | 0.588 | 0.588 | 0.591 | 0.595 | 0.6   | 0.606 | 0.612 | 0.618 |
| Ealing                    | 0.609 | 0.611 | 0.612 | 0.613 | 0.614 | 0.614  | 0.613 | 0.611 | 0.61  | 0.609 | 0.607 | 0.606 | 0.605 | 0.606 | 0.608 | 0.612 | 0.617 | 0.623 | 0.628 | 0.634 |
| Enfield                   | 0.585 | 0.588 | 0.589 | 0.59  | 0.591 | 0.591  | 0.59  | 0.589 | 0.588 | 0.587 | 0.585 | 0.584 | 0.584 | 0.585 | 0.587 | 0.591 | 0.596 | 0.602 | 0.608 | 0.614 |
| Greenwich                 | 0.577 | 0.579 | 0.58  | 0.581 | 0.581 | 0.581  | 0.58  | 0.579 | 0.577 | 0.576 | 0.574 | 0.573 | 0.572 | 0.573 | 0.575 | 0.579 | 0.584 | 0.59  | 0.595 | 0.601 |
| Hackney                   | 0.65  | 0.652 | 0.652 | 0.652 | 0.651 | 0.649  | 0.645 | 0.642 | 0.638 | 0.634 | 0.629 | 0.625 | 0.622 | 0.62  | 0.621 | 0.624 | 0.629 | 0.635 | 0.641 | 0.647 |
| Hammersmith and Fulham    | 0.665 | 0.668 | 0.669 | 0.67  | 0.671 | 0.671  | 0.671 | 0.67  | 0.669 | 0.669 | 0.668 | 0.668 | 0.668 | 0.67  | 0.672 | 0.676 | 0.68  | 0.686 | 0.691 | 0.696 |
| Haringey                  | 0.597 | 0.599 | 0.6   | 0.602 | 0.603 | 0.602  | 0.602 | 0.601 | 0.6   | 0.598 | 0.597 | 0.596 | 0.596 | 0.597 | 0.599 | 0.603 | 0.608 | 0.614 | 0.62  | 0.626 |
| Harrow                    | 0.597 | 0.599 | 0.6   | 0.602 | 0.602 | 0.602  | 0.602 | 0.601 | 0.6   | 0.598 | 0.597 | 0.596 | 0.596 | 0.597 | 0.599 | 0.603 | 0.608 | 0.614 | 0.62  | 0.625 |
| Havering                  | 0.579 | 0.581 | 0.582 | 0.584 | 0.584 | 0.584  | 0.583 | 0.582 | 0.582 | 0.58  | 0.579 | 0.579 | 0.578 | 0.579 | 0.582 | 0.586 | 0.591 | 0.596 | 0.602 | 0.607 |
| Hillingdon                | 0.631 | 0.634 | 0.635 | 0.636 | 0.637 | 0.636  | 0.635 | 0.634 | 0.633 | 0.632 | 0.63  | 0.629 | 0.629 | 0.63  | 0.632 | 0.636 | 0.641 | 0.647 | 0.653 | 0.658 |
| Hounslow                  | 0.615 | 0.617 | 0.619 | 0.62  | 0.62  | 0.62   | 0.619 | 0.618 | 0.616 | 0.615 | 0.613 | 0.612 | 0.612 | 0.612 | 0.615 | 0.619 | 0.624 | 0.63  | 0.636 | 0.641 |
| Islington                 | 0.669 | 0.672 | 0.673 | 0.674 | 0.674 | 0.674  | 0.673 | 0.671 | 0.67  | 0.669 | 0.668 | 0.667 | 0.666 | 0.667 | 0.67  | 0.673 | 0.678 | 0.684 | 0.69  | 0.695 |
| Kensington and Chelsea    | 0.688 | 0.69  | 0.691 | 0.693 | 0.694 | 0.694  | 0.695 | 0.695 | 0.695 | 0.695 | 0.695 | 0.695 | 0.696 | 0.698 | 0.7   | 0.704 | 0.708 | 0.713 | 0.719 | 0.724 |
| Kingston upon Thames      | 0.637 | 0.639 | 0.641 | 0.642 | 0.643 | 0.643  | 0.643 | 0.643 | 0.642 | 0.642 | 0.642 | 0.641 | 0.642 | 0.643 | 0.646 | 0.649 | 0.654 | 0.659 | 0.664 | 0.669 |
| Lambeth                   | 0.616 | 0.618 | 0.619 | 0.62  | 0.621 | 0.62   | 0.619 | 0.617 | 0.616 | 0.614 | 0.613 | 0.611 | 0.611 | 0.612 | 0.614 | 0.618 | 0.623 | 0.628 | 0.634 | 0.64  |
| Lewisham                  | 0.579 | 0.581 | 0.582 | 0.583 | 0.584 | 0.584  | 0.583 | 0.582 | 0.581 | 0.579 | 0.578 | 0.577 | 0.577 | 0.578 | 0.58  | 0.584 | 0.589 | 0.594 | 0.6   | 0.605 |
| Merton                    | 0.607 | 0.609 | 0.61  | 0.611 | 0.612 | 0.612  | 0.61  | 0.609 | 0.608 | 0.607 | 0.605 | 0.604 | 0.604 | 0.605 | 0.607 | 0.611 | 0.616 | 0.621 | 0.627 | 0.633 |
| Newham                    | 0.564 | 0.566 | 0.567 | 0.567 | 0.568 | 0.567  | 0.565 | 0.564 | 0.562 | 0.56  | 0.557 | 0.555 | 0.554 | 0.555 | 0.557 | 0.561 | 0.567 | 0.573 | 0.579 | 0.585 |
| Redbridge                 | 0.581 | 0.583 | 0.584 | 0.585 | 0.586 | 0.586  | 0.585 | 0.584 | 0.583 | 0.582 | 0.581 | 0.58  | 0.58  | 0.581 | 0.583 | 0.587 | 0.592 | 0.597 | 0.603 | 0.609 |
| Richmond upon Thames      | 0.648 | 0.65  | 0.651 | 0.653 | 0.653 | 0.654  | 0.653 | 0.653 | 0.652 | 0.651 | 0.651 | 0.651 | 0.651 | 0.652 | 0.654 | 0.658 | 0.662 | 0.667 | 0.673 | 0.678 |
| Southwark                 | 0.637 | 0.639 | 0.64  | 0.64  | 0.641 | 0.64   | 0.638 | 0.637 | 0.635 | 0.633 | 0.631 | 0.63  | 0.629 | 0.629 | 0.631 | 0.635 | 0.64  | 0.646 | 0.652 | 0.657 |
| Sutton                    | 0.584 | 0.587 | 0.588 | 0.589 | 0.59  | 0.59   | 0.589 | 0.589 | 0.588 | 0.587 | 0.585 | 0.585 | 0.584 | 0.586 | 0.588 | 0.592 | 0.597 | 0.603 | 0.609 | 0.615 |
| Tower Hamlets             | 0.636 | 0.638 | 0.639 | 0.639 | 0.638 | 0.637  | 0.634 | 0.631 | 0.628 | 0.625 | 0.621 | 0.618 | 0.615 | 0.614 | 0.615 | 0.618 | 0.622 | 0.628 | 0.633 | 0.639 |
| Waltham Forest            | 0.558 | 0.56  | 0.561 | 0.563 | 0.563 | 0.563  | 0.562 | 0.561 | 0.56  | 0.559 | 0.557 | 0.556 | 0.555 | 0.556 | 0.559 | 0.562 | 0.568 | 0.573 | 0.579 | 0.585 |
| Wandsworth                | 0.634 | 0.636 | 0.637 | 0.639 | 0.639 | 0.639  | 0.638 | 0.638 | 0.637 | 0.636 | 0.635 | 0.634 | 0.634 | 0.635 | 0.637 | 0.641 | 0.645 | 0.651 | 0.656 | 0.661 |
| Westminster               | 0.72  | 0.722 | 0.723 | 0.723 | 0.723 | 0.722  | 0.721 | 0.72  | 0.718 | 0.717 | 0.715 | 0.714 | 0.713 | 0.714 | 0.715 | 0.718 | 0.721 | 0.725 | 0.73  | 0.734 |
| North East England        | 0.536 | 0.538 | 0.539 | 0.541 | 0.542 | 0.542  | 0.541 | 0.539 | 0.538 | 0.537 | 0.535 | 0.534 | 0.534 | 0.535 | 0.538 | 0.542 | 0.548 | 0.554 | 0.56  | 0.566 |
| County Durham             | 0.529 | 0.531 | 0.533 | 0.534 | 0.535 | 0.535  | 0.534 | 0.533 | 0.532 | 0.531 | 0.53  | 0.529 | 0.529 | 0.53  | 0.533 | 0.537 | 0.543 | 0.549 | 0.556 | 0.561 |
| Darlington                | 0.547 | 0.55  | 0.55  | 0.552 | 0.552 | 0.552  | 0.551 | 0.55  | 0.548 | 0.546 | 0.545 | 0.543 | 0.542 | 0.543 | 0.546 | 0.55  | 0.556 | 0.563 | 0.569 | 0.576 |
| Gateshead                 | 0.542 | 0.544 | 0.545 | 0.546 | 0.547 | 0.547  | 0.546 | 0.545 | 0.543 | 0.541 | 0.54  | 0.539 | 0.538 | 0.539 | 0.542 | 0.546 | 0.551 | 0.558 | 0.564 | 0.57  |
| Hartlepool                | 0.522 | 0.524 | 0.525 | 0.527 | 0.527 | 0.527  | 0.525 | 0.524 | 0.522 | 0.52  | 0.518 | 0.516 | 0.515 | 0.516 | 0.519 | 0.523 | 0.529 | 0.535 | 0.542 | 0.548 |
| Middlesbrough             | 0.526 | 0.528 | 0.529 | 0.53  | 0.531 | 0.531  | 0.529 | 0.528 | 0.526 | 0.524 | 0.522 | 0.521 | 0.52  | 0.521 | 0.523 | 0.528 | 0.534 | 0.54  | 0.547 | 0.553 |
| Newcastle upon Tyne       | 0.566 | 0.569 | 0.57  | 0.571 | 0.572 | 0.573  | 0.572 | 0.572 | 0.571 | 0.571 | 0.57  | 0.57  | 0.57  | 0.572 | 0.575 | 0.579 | 0.585 | 0.591 | 0.597 | 0.603 |
| North Tyneside            | 0.539 | 0.541 | 0.542 | 0.544 | 0.545 | 0.544  | 0.543 | 0.542 | 0.54  | 0.54  | 0.538 | 0.537 | 0.537 | 0.538 | 0.541 | 0.545 | 0.55  | 0.557 | 0.563 | 0.569 |
| Northumberland            | 0.535 | 0.538 | 0.539 | 0.54  | 0.541 | 0.541  | 0.541 | 0.539 | 0.538 | 0.537 | 0.536 | 0.534 | 0.534 | 0.535 | 0.538 | 0.542 | 0.548 | 0.554 | 0.561 | 0.567 |
| Redcar and Cleveland      | 0.513 | 0.516 | 0.517 | 0.518 | 0.519 | 0.518  | 0.517 | 0.516 | 0.514 | 0.513 | 0.511 | 0.51  | 0.509 | 0.509 | 0.512 | 0.517 | 0.522 | 0.529 | 0.535 | 0.541 |
| South Tyneside            | 0.507 | 0.509 | 0.51  | 0.512 | 0.513 | 0.512  | 0.511 | 0.51  | 0.509 | 0.508 | 0.506 | 0.505 | 0.505 | 0.506 | 0.509 | 0.513 | 0.519 | 0.525 | 0.531 | 0.538 |
| Stockton-on-Tees          | 0.546 | 0.549 | 0.55  | 0.551 | 0.551 | 0.551  | 0.55  | 0.548 | 0.547 | 0.545 | 0.543 | 0.541 | 0.54  | 0.541 | 0.544 | 0.548 | 0.554 | 0.56  | 0.567 | 0.573 |
| Sunderland                | 0.528 | 0.53  | 0.531 | 0.532 | 0.533 | 0.533  | 0.532 | 0.53  | 0.529 | 0.527 | 0.525 | 0.524 | 0.523 | 0.523 | 0.526 | 0.531 | 0.536 | 0.543 | 0.549 | 0.556 |
| North West England        | 0.567 | 0.57  | 0.571 | 0.572 | 0.572 | 0.572  | 0.571 | 0.57  | 0.568 | 0.567 | 0.565 | 0.564 | 0.563 | 0.564 | 0.567 | 0.571 | 0.576 | 0.582 | 0.588 | 0.594 |
| Blackburn with Darwen     | 0.539 | 0.541 | 0.542 | 0.544 | 0.544 | 0.543  | 0.542 | 0.54  | 0.538 | 0.536 | 0.533 | 0.531 | 0.53  | 0.53  | 0.533 | 0.537 | 0.542 | 0.549 | 0.555 | 0.562 |
| Blackpool                 | 0.53  | 0.532 | 0.534 | 0.535 | 0.536 | 0.536  | 0.535 | 0.534 | 0.533 | 0.532 | 0.531 | 0.53  | 0.53  | 0.531 | 0.534 | 0.538 | 0.544 | 0.55  | 0.556 | 0.562 |
| Bolton                    | 0.551 | 0.553 | 0.554 | 0.555 | 0.556 | 0.556  | 0.554 | 0.553 | 0.551 | 0.549 | 0.548 | 0.546 | 0.545 | 0.546 | 0.548 | 0.552 | 0.558 | 0.564 | 0.57  | 0.576 |
| Bury                      | 0.555 | 0.558 | 0.559 | 0.56  | 0.561 | 0.56   | 0.559 | 0.558 | 0.557 | 0.555 | 0.554 | 0.552 | 0.552 | 0.553 | 0.555 | 0.559 | 0.565 | 0.571 | 0.577 | 0.583 |
| Cheshire East             | 0.602 | 0.604 | 0.605 | 0.606 | 0.607 | 0.607  | 0.606 | 0.604 | 0.603 | 0.602 | 0.6   | 0.599 | 0.598 | 0.599 | 0.602 | 0.606 | 0.611 | 0.617 | 0.623 | 0.628 |
| Cheshire West and Chester | 0.594 | 0.596 | 0.597 | 0.598 | 0.599 | 0.598  | 0.597 | 0.596 | 0.594 | 0.593 | 0.591 | 0.59  | 0.589 | 0.59  | 0.592 | 0.596 | 0.602 | 0.607 | 0.613 | 0.619 |
| Cumbria                   | 0.572 | 0.575 | 0.576 | 0.577 | 0.578 | 0.578  | 0.576 | 0.575 | 0.574 | 0.572 | 0.571 | 0.569 | 0.569 | 0.57  | 0.573 | 0.577 | 0.582 | 0.588 | 0.594 | 0.6   |
| Halton                    | 0.557 | 0.559 | 0.56  | 0.561 | 0.562 | 0.561  | 0.559 | 0.557 | 0.556 | 0.553 | 0.551 | 0.549 | 0.548 | 0.549 | 0.551 | 0.555 | 0.561 | 0.567 | 0.573 | 0.579 |
| Knowsley                  | 0.547 | 0.549 | 0.55  | 0.551 | 0.551 | 0.55</ |       |       |       |       |       |       |       |       |       |       |       |       |       |       |

**Appendix Table 9. Socio-demographic Index values for all estimated GBD 2017 locations, 1950-1969**

| Location                     | 1950  | 1951  | 1952  | 1953  | 1954  | 1955  | 1956  | 1957  | 1958  | 1959  | 1960  | 1961  | 1962  | 1963  | 1964  | 1965  | 1966  | 1967  | 1968  | 1969  |
|------------------------------|-------|-------|-------|-------|-------|-------|-------|-------|-------|-------|-------|-------|-------|-------|-------|-------|-------|-------|-------|-------|
| St Helens                    | 0.539 | 0.541 | 0.542 | 0.543 | 0.544 | 0.543 | 0.542 | 0.541 | 0.54  | 0.538 | 0.537 | 0.535 | 0.535 | 0.535 | 0.538 | 0.542 | 0.547 | 0.553 | 0.559 | 0.565 |
| Stockport                    | 0.581 | 0.583 | 0.584 | 0.585 | 0.586 | 0.585 | 0.584 | 0.583 | 0.581 | 0.58  | 0.578 | 0.577 | 0.576 | 0.577 | 0.58  | 0.584 | 0.589 | 0.594 | 0.6   | 0.606 |
| Tameside                     | 0.544 | 0.547 | 0.547 | 0.549 | 0.549 | 0.549 | 0.548 | 0.546 | 0.545 | 0.543 | 0.542 | 0.54  | 0.539 | 0.54  | 0.543 | 0.547 | 0.552 | 0.558 | 0.564 | 0.57  |
| Trafford                     | 0.606 | 0.608 | 0.609 | 0.61  | 0.61  | 0.61  | 0.608 | 0.607 | 0.605 | 0.603 | 0.601 | 0.6   | 0.599 | 0.6   | 0.602 | 0.606 | 0.611 | 0.617 | 0.623 | 0.628 |
| Warrington                   | 0.593 | 0.596 | 0.596 | 0.597 | 0.598 | 0.597 | 0.596 | 0.594 | 0.592 | 0.59  | 0.588 | 0.587 | 0.586 | 0.586 | 0.589 | 0.593 | 0.598 | 0.604 | 0.61  | 0.616 |
| Wigan                        | 0.543 | 0.545 | 0.546 | 0.547 | 0.548 | 0.547 | 0.546 | 0.545 | 0.543 | 0.542 | 0.54  | 0.539 | 0.538 | 0.539 | 0.541 | 0.546 | 0.551 | 0.557 | 0.563 | 0.569 |
| Wirral                       | 0.549 | 0.551 | 0.552 | 0.553 | 0.554 | 0.553 | 0.552 | 0.551 | 0.549 | 0.547 | 0.546 | 0.544 | 0.544 | 0.544 | 0.547 | 0.551 | 0.556 | 0.562 | 0.568 | 0.574 |
| South East England           | 0.608 | 0.611 | 0.611 | 0.612 | 0.613 | 0.613 | 0.611 | 0.61  | 0.609 | 0.607 | 0.605 | 0.604 | 0.603 | 0.604 | 0.607 | 0.611 | 0.616 | 0.621 | 0.627 | 0.633 |
| Bracknell Forest             | 0.62  | 0.622 | 0.622 | 0.623 | 0.623 | 0.623 | 0.621 | 0.619 | 0.617 | 0.615 | 0.613 | 0.612 | 0.611 | 0.611 | 0.613 | 0.617 | 0.622 | 0.628 | 0.633 | 0.639 |
| Brighton and Hove            | 0.616 | 0.618 | 0.619 | 0.62  | 0.621 | 0.622 | 0.622 | 0.621 | 0.621 | 0.621 | 0.62  | 0.62  | 0.621 | 0.622 | 0.625 | 0.629 | 0.633 | 0.638 | 0.643 | 0.648 |
| Buckinghamshire              | 0.628 | 0.63  | 0.631 | 0.631 | 0.632 | 0.631 | 0.63  | 0.628 | 0.626 | 0.625 | 0.623 | 0.621 | 0.62  | 0.621 | 0.623 | 0.627 | 0.632 | 0.637 | 0.643 | 0.649 |
| East Sussex                  | 0.568 | 0.571 | 0.572 | 0.573 | 0.574 | 0.574 | 0.573 | 0.572 | 0.571 | 0.569 | 0.568 | 0.566 | 0.566 | 0.567 | 0.57  | 0.574 | 0.579 | 0.585 | 0.591 | 0.597 |
| Hampshire                    | 0.605 | 0.607 | 0.608 | 0.609 | 0.609 | 0.609 | 0.607 | 0.606 | 0.604 | 0.602 | 0.6   | 0.599 | 0.598 | 0.598 | 0.601 | 0.605 | 0.61  | 0.616 | 0.621 | 0.627 |
| Isle of Wight                | 0.565 | 0.568 | 0.569 | 0.57  | 0.571 | 0.57  | 0.569 | 0.567 | 0.566 | 0.564 | 0.562 | 0.56  | 0.559 | 0.56  | 0.562 | 0.566 | 0.572 | 0.578 | 0.584 | 0.59  |
| Kent                         | 0.582 | 0.585 | 0.586 | 0.587 | 0.587 | 0.587 | 0.585 | 0.584 | 0.582 | 0.581 | 0.579 | 0.577 | 0.577 | 0.577 | 0.58  | 0.584 | 0.589 | 0.595 | 0.601 | 0.607 |
| Medway                       | 0.56  | 0.563 | 0.564 | 0.565 | 0.565 | 0.564 | 0.563 | 0.561 | 0.559 | 0.557 | 0.555 | 0.554 | 0.553 | 0.553 | 0.556 | 0.56  | 0.565 | 0.571 | 0.577 | 0.583 |
| Milton Keynes                | 0.602 | 0.605 | 0.606 | 0.607 | 0.608 | 0.607 | 0.605 | 0.603 | 0.601 | 0.599 | 0.596 | 0.594 | 0.592 | 0.593 | 0.595 | 0.599 | 0.605 | 0.611 | 0.618 | 0.625 |
| Oxfordshire                  | 0.63  | 0.632 | 0.633 | 0.634 | 0.634 | 0.634 | 0.633 | 0.631 | 0.63  | 0.629 | 0.627 | 0.626 | 0.626 | 0.627 | 0.629 | 0.633 | 0.638 | 0.643 | 0.649 | 0.654 |
| Portsmouth                   | 0.593 | 0.596 | 0.597 | 0.598 | 0.599 | 0.599 | 0.598 | 0.597 | 0.596 | 0.595 | 0.594 | 0.593 | 0.592 | 0.593 | 0.596 | 0.601 | 0.606 | 0.612 | 0.619 | 0.625 |
| Reading                      | 0.635 | 0.637 | 0.638 | 0.639 | 0.639 | 0.639 | 0.638 | 0.636 | 0.635 | 0.633 | 0.632 | 0.631 | 0.63  | 0.631 | 0.634 | 0.637 | 0.643 | 0.648 | 0.654 | 0.66  |
| Slough                       | 0.625 | 0.627 | 0.628 | 0.628 | 0.628 | 0.627 | 0.624 | 0.621 | 0.619 | 0.616 | 0.612 | 0.609 | 0.607 | 0.607 | 0.609 | 0.613 | 0.618 | 0.624 | 0.631 | 0.637 |
| Southampton                  | 0.609 | 0.611 | 0.612 | 0.613 | 0.613 | 0.613 | 0.612 | 0.61  | 0.609 | 0.608 | 0.606 | 0.605 | 0.605 | 0.605 | 0.608 | 0.612 | 0.617 | 0.623 | 0.628 | 0.634 |
| Surrey                       | 0.636 | 0.638 | 0.639 | 0.64  | 0.641 | 0.64  | 0.639 | 0.638 | 0.637 | 0.635 | 0.634 | 0.633 | 0.633 | 0.634 | 0.636 | 0.64  | 0.645 | 0.65  | 0.655 | 0.661 |
| West Berkshire               | 0.631 | 0.633 | 0.634 | 0.635 | 0.635 | 0.634 | 0.633 | 0.631 | 0.629 | 0.627 | 0.624 | 0.623 | 0.621 | 0.622 | 0.624 | 0.628 | 0.634 | 0.64  | 0.646 | 0.652 |
| West Sussex                  | 0.596 | 0.598 | 0.599 | 0.601 | 0.601 | 0.601 | 0.6   | 0.599 | 0.597 | 0.596 | 0.594 | 0.593 | 0.593 | 0.593 | 0.596 | 0.6   | 0.605 | 0.611 | 0.617 | 0.623 |
| Windsor and Maidenhead       | 0.642 | 0.644 | 0.645 | 0.646 | 0.646 | 0.646 | 0.644 | 0.643 | 0.641 | 0.639 | 0.637 | 0.636 | 0.635 | 0.636 | 0.638 | 0.642 | 0.647 | 0.652 | 0.658 | 0.664 |
| Wokingham                    | 0.642 | 0.643 | 0.644 | 0.645 | 0.645 | 0.644 | 0.643 | 0.642 | 0.64  | 0.639 | 0.637 | 0.636 | 0.635 | 0.636 | 0.638 | 0.642 | 0.647 | 0.652 | 0.658 | 0.664 |
| South West England           | 0.577 | 0.58  | 0.581 | 0.582 | 0.583 | 0.583 | 0.582 | 0.581 | 0.58  | 0.579 | 0.578 | 0.577 | 0.577 | 0.578 | 0.58  | 0.585 | 0.59  | 0.596 | 0.602 | 0.608 |
| Bath and North East Somerset | 0.597 | 0.599 | 0.601 | 0.602 | 0.603 | 0.604 | 0.604 | 0.604 | 0.604 | 0.603 | 0.604 | 0.604 | 0.605 | 0.606 | 0.609 | 0.613 | 0.618 | 0.624 | 0.629 | 0.634 |
| Bournemouth                  | 0.573 | 0.576 | 0.577 | 0.579 | 0.58  | 0.581 | 0.581 | 0.581 | 0.581 | 0.581 | 0.581 | 0.582 | 0.583 | 0.585 | 0.588 | 0.592 | 0.597 | 0.603 | 0.608 | 0.614 |
| Bristol, City of             | 0.607 | 0.609 | 0.61  | 0.611 | 0.612 | 0.612 | 0.611 | 0.61  | 0.61  | 0.609 | 0.608 | 0.607 | 0.607 | 0.608 | 0.611 | 0.615 | 0.62  | 0.626 | 0.632 | 0.637 |
| Cornwall                     | 0.548 | 0.551 | 0.552 | 0.553 | 0.554 | 0.554 | 0.553 | 0.552 | 0.551 | 0.549 | 0.548 | 0.547 | 0.546 | 0.547 | 0.55  | 0.554 | 0.56  | 0.566 | 0.572 | 0.578 |
| Devon                        | 0.566 | 0.568 | 0.57  | 0.571 | 0.572 | 0.572 | 0.572 | 0.571 | 0.57  | 0.57  | 0.569 | 0.568 | 0.568 | 0.57  | 0.573 | 0.577 | 0.582 | 0.588 | 0.594 | 0.6   |
| Dorset                       | 0.568 | 0.57  | 0.571 | 0.573 | 0.573 | 0.573 | 0.573 | 0.572 | 0.571 | 0.569 | 0.568 | 0.567 | 0.567 | 0.568 | 0.571 | 0.575 | 0.58  | 0.586 | 0.593 | 0.599 |
| Gloucestershire              | 0.584 | 0.587 | 0.588 | 0.589 | 0.59  | 0.59  | 0.589 | 0.587 | 0.586 | 0.585 | 0.584 | 0.583 | 0.582 | 0.583 | 0.586 | 0.59  | 0.595 | 0.601 | 0.607 | 0.613 |
| North Somerset               | 0.561 | 0.563 | 0.564 | 0.566 | 0.566 | 0.566 | 0.566 | 0.565 | 0.564 | 0.562 | 0.561 | 0.56  | 0.56  | 0.561 | 0.564 | 0.568 | 0.573 | 0.579 | 0.585 | 0.591 |
| Plymouth                     | 0.56  | 0.563 | 0.564 | 0.566 | 0.567 | 0.567 | 0.566 | 0.566 | 0.565 | 0.564 | 0.563 | 0.562 | 0.562 | 0.563 | 0.566 | 0.571 | 0.576 | 0.582 | 0.588 | 0.594 |
| Poole                        | 0.575 | 0.578 | 0.579 | 0.58  | 0.581 | 0.581 | 0.58  | 0.579 | 0.578 | 0.576 | 0.575 | 0.574 | 0.574 | 0.575 | 0.578 | 0.582 | 0.587 | 0.593 | 0.6   | 0.606 |
| Somerset                     | 0.564 | 0.567 | 0.568 | 0.569 | 0.57  | 0.57  | 0.569 | 0.568 | 0.566 | 0.565 | 0.563 | 0.562 | 0.562 | 0.563 | 0.565 | 0.57  | 0.575 | 0.581 | 0.587 | 0.593 |
| South Gloucestershire        | 0.599 | 0.601 | 0.602 | 0.603 | 0.604 | 0.604 | 0.603 | 0.601 | 0.6   | 0.599 | 0.597 | 0.596 | 0.596 | 0.597 | 0.6   | 0.604 | 0.609 | 0.615 | 0.621 | 0.627 |
| Swindon                      | 0.598 | 0.6   | 0.601 | 0.602 | 0.603 | 0.602 | 0.601 | 0.599 | 0.597 | 0.595 | 0.593 | 0.591 | 0.59  | 0.591 | 0.593 | 0.597 | 0.602 | 0.609 | 0.615 | 0.621 |
| Torbay                       | 0.542 | 0.545 | 0.546 | 0.548 | 0.549 | 0.549 | 0.549 | 0.548 | 0.548 | 0.547 | 0.546 | 0.545 | 0.545 | 0.546 | 0.549 | 0.554 | 0.559 | 0.565 | 0.571 | 0.578 |
| Wiltshire                    | 0.58  | 0.582 | 0.584 | 0.585 | 0.585 | 0.585 | 0.583 | 0.582 | 0.58  | 0.579 | 0.577 | 0.575 | 0.574 | 0.575 | 0.578 | 0.582 | 0.587 | 0.593 | 0.599 | 0.605 |
| West Midlands                | 0.555 | 0.557 | 0.558 | 0.559 | 0.56  | 0.559 | 0.558 | 0.557 | 0.555 | 0.554 | 0.552 | 0.551 | 0.55  | 0.551 | 0.553 | 0.557 | 0.563 | 0.569 | 0.575 | 0.581 |
| Birmingham                   | 0.552 | 0.554 | 0.555 | 0.555 | 0.556 | 0.555 | 0.554 | 0.552 | 0.551 | 0.549 | 0.547 | 0.545 | 0.544 | 0.545 | 0.547 | 0.551 | 0.557 | 0.563 | 0.569 | 0.575 |
| Coventry                     | 0.57  | 0.572 | 0.572 | 0.573 | 0.574 | 0.573 | 0.572 | 0.57  | 0.569 | 0.567 | 0.565 | 0.564 | 0.563 | 0.564 | 0.567 | 0.571 | 0.576 | 0.582 | 0.588 | 0.594 |
| Dudley                       | 0.543 | 0.545 | 0.546 | 0.547 | 0.548 | 0.547 | 0.546 | 0.545 | 0.543 | 0.542 | 0.54  | 0.539 | 0.538 | 0.539 | 0.541 | 0.546 | 0.551 | 0.557 | 0.563 | 0.569 |
| Herefordshire, County of     | 0.557 | 0.559 | 0.56  | 0.561 | 0.562 | 0.562 | 0.56  | 0.559 | 0.558 | 0.556 | 0.555 | 0.553 | 0.553 | 0.554 | 0.556 | 0.56  | 0.566 | 0.572 | 0.578 | 0.584 |
| Sandwell                     | 0.535 | 0.537 | 0.538 | 0.539 | 0.539 | 0.539 | 0.537 | 0.535 | 0.534 | 0.531 | 0.529 | 0.527 | 0.526 | 0.527 | 0.529 | 0.533 | 0.538 | 0.544 | 0.55  | 0.556 |
| Shropshire                   | 0.558 | 0.56  | 0.561 | 0.562 | 0.563 | 0.563 | 0.562 | 0.561 | 0.56  | 0.558 | 0.557 | 0.556 | 0.555 | 0.556 | 0.559 | 0.563 | 0.569 | 0.575 | 0.581 | 0.587 |
| Solihull                     | 0.59  | 0.592 | 0.593 | 0.594 | 0.595 | 0.594 | 0.593 | 0.591 | 0.59  | 0.588 | 0.586 | 0.585 | 0.584 | 0.585 | 0.587 | 0.591 | 0.596 | 0.602 | 0.608 | 0.614 |
| Staffordshire                | 0.557 | 0.559 | 0.56  | 0.561 | 0.562 | 0.562 | 0.561 | 0.559 | 0.558 | 0.557 | 0.555 | 0.554 | 0.554 | 0.555 | 0.557 | 0.562 | 0.567 | 0.573 | 0.579 | 0.585 |
| Stoke-on-Trent               | 0.538 | 0.54  | 0.54  | 0.541 | 0.542 | 0.541 | 0.54  | 0.539 | 0.537 | 0.536 | 0.534 | 0.532 | 0.532 | 0.532 | 0.535 | 0.539 | 0.544 | 0.55  | 0.556 | 0.562 |
| Telford and Wrekin           | 0.561 | 0.564 | 0.564 | 0.565 | 0.566 | 0.565 | 0.564 | 0.562 | 0.56  | 0.558 | 0.556 | 0.554 | 0.553 | 0.554 | 0.556 | 0.56  | 0.566 | 0.572 | 0.579 | 0.585 |
| Walsall                      | 0.534 | 0.536 | 0.537 | 0.538 | 0.539 | 0.538 | 0.537 | 0.535 | 0.533 | 0.532 | 0.53  | 0.528 | 0.527 | 0.528 | 0.53  | 0.534 | 0.54  | 0.546 | 0.552 | 0.558 |
| Warwickshire                 | 0.582 | 0.584 | 0.585 | 0.586 | 0.586 | 0.586 | 0.585 | 0.584 | 0.582 | 0.581 | 0.579 | 0.578 | 0.577 | 0.578 | 0.581 | 0.585 | 0.59  | 0.596 | 0.602 | 0.608 |
| Wolverhampton                | 0.544 | 0.546 | 0.547 | 0.547 | 0.548 | 0.547 | 0.546 | 0.544 | 0.542 | 0.541 | 0.539 | 0.537 | 0.536 | 0.536 | 0.539 | 0.543 | 0.548 | 0.554 | 0.56  | 0.566 |
| Worcestershire               | 0.556 | 0.558 | 0.559 |       |       |       |       |       |       |       |       |       |       |       |       |       |       |       |       |       |

**Appendix Table 9. Socio-demographic Index values for all estimated GBD 2017 locations, 1950-1969**

| Location                         | 1950  | 1951  | 1952  | 1953  | 1954  | 1955  | 1956  | 1957  | 1958  | 1959  | 1960  | 1961  | 1962  | 1963  | 1964  | 1965  | 1966  | 1967  | 1968  | 1969  |
|----------------------------------|-------|-------|-------|-------|-------|-------|-------|-------|-------|-------|-------|-------|-------|-------|-------|-------|-------|-------|-------|-------|
| Kirklees                         | 0.543 | 0.545 | 0.546 | 0.548 | 0.548 | 0.548 | 0.547 | 0.546 | 0.545 | 0.543 | 0.542 | 0.54  | 0.54  | 0.541 | 0.544 | 0.548 | 0.553 | 0.56  | 0.566 | 0.572 |
| Leeds                            | 0.579 | 0.581 | 0.582 | 0.583 | 0.584 | 0.584 | 0.583 | 0.583 | 0.582 | 0.581 | 0.58  | 0.579 | 0.579 | 0.58  | 0.583 | 0.587 | 0.592 | 0.598 | 0.604 | 0.61  |
| North East Lincolnshire          | 0.547 | 0.549 | 0.55  | 0.551 | 0.552 | 0.551 | 0.549 | 0.547 | 0.545 | 0.543 | 0.541 | 0.538 | 0.537 | 0.538 | 0.54  | 0.545 | 0.55  | 0.557 | 0.564 | 0.57  |
| North Lincolnshire               | 0.554 | 0.556 | 0.557 | 0.558 | 0.558 | 0.558 | 0.556 | 0.555 | 0.553 | 0.551 | 0.549 | 0.547 | 0.546 | 0.547 | 0.549 | 0.553 | 0.559 | 0.565 | 0.572 | 0.578 |
| North Yorkshire                  | 0.569 | 0.571 | 0.573 | 0.574 | 0.575 | 0.575 | 0.574 | 0.573 | 0.572 | 0.571 | 0.569 | 0.568 | 0.568 | 0.569 | 0.572 | 0.576 | 0.582 | 0.588 | 0.594 | 0.6   |
| Rotherham                        | 0.531 | 0.533 | 0.534 | 0.535 | 0.536 | 0.536 | 0.534 | 0.533 | 0.532 | 0.53  | 0.528 | 0.527 | 0.526 | 0.527 | 0.53  | 0.534 | 0.539 | 0.546 | 0.552 | 0.558 |
| Sheffield                        | 0.569 | 0.571 | 0.572 | 0.573 | 0.574 | 0.574 | 0.574 | 0.573 | 0.573 | 0.572 | 0.571 | 0.571 | 0.571 | 0.572 | 0.575 | 0.58  | 0.585 | 0.591 | 0.596 | 0.602 |
| Wakefield                        | 0.539 | 0.542 | 0.543 | 0.544 | 0.545 | 0.544 | 0.543 | 0.542 | 0.54  | 0.539 | 0.537 | 0.536 | 0.535 | 0.536 | 0.539 | 0.543 | 0.548 | 0.555 | 0.561 | 0.567 |
| York                             | 0.601 | 0.603 | 0.605 | 0.606 | 0.607 | 0.607 | 0.606 | 0.606 | 0.605 | 0.605 | 0.604 | 0.604 | 0.604 | 0.606 | 0.609 | 0.613 | 0.618 | 0.623 | 0.629 | 0.635 |
| Northern Ireland                 | 0.502 | 0.505 | 0.506 | 0.508 | 0.508 | 0.509 | 0.509 | 0.511 | 0.512 | 0.513 | 0.514 | 0.515 | 0.517 | 0.52  | 0.525 | 0.533 | 0.541 | 0.549 | 0.557 | 0.565 |
| Scotland                         | 0.508 | 0.51  | 0.51  | 0.51  | 0.511 | 0.511 | 0.509 | 0.508 | 0.508 | 0.509 | 0.509 | 0.509 | 0.509 | 0.511 | 0.514 | 0.519 | 0.523 | 0.527 | 0.533 | 0.538 |
| Wales                            | 0.465 | 0.467 | 0.468 | 0.469 | 0.47  | 0.47  | 0.469 | 0.468 | 0.467 | 0.466 | 0.464 | 0.463 | 0.463 | 0.464 | 0.467 | 0.471 | 0.477 | 0.483 | 0.489 | 0.496 |
| Latin America and Caribbean      | 0.28  | 0.284 | 0.287 | 0.29  | 0.293 | 0.296 | 0.3   | 0.303 | 0.306 | 0.308 | 0.312 | 0.316 | 0.321 | 0.326 | 0.331 | 0.338 | 0.345 | 0.352 | 0.359 | 0.366 |
| Andean Latin America             | 0.256 | 0.264 | 0.272 | 0.278 | 0.28  | 0.282 | 0.285 | 0.288 | 0.289 | 0.291 | 0.293 | 0.296 | 0.301 | 0.306 | 0.312 | 0.32  | 0.329 | 0.337 | 0.344 | 0.349 |
| Bolivia                          | 0.235 | 0.245 | 0.251 | 0.255 | 0.258 | 0.264 | 0.268 | 0.265 | 0.258 | 0.253 | 0.252 | 0.253 | 0.256 | 0.26  | 0.265 | 0.272 | 0.279 | 0.285 | 0.29  | 0.295 |
| Ecuador                          | 0.288 | 0.3   | 0.313 | 0.323 | 0.325 | 0.321 | 0.319 | 0.322 | 0.326 | 0.329 | 0.327 | 0.325 | 0.328 | 0.333 | 0.339 | 0.35  | 0.362 | 0.37  | 0.38  | 0.385 |
| Peru                             | 0.244 | 0.248 | 0.252 | 0.255 | 0.259 | 0.263 | 0.268 | 0.272 | 0.277 | 0.281 | 0.286 | 0.293 | 0.299 | 0.305 | 0.31  | 0.316 | 0.324 | 0.332 | 0.338 | 0.341 |
| Caribbean                        | 0.344 | 0.348 | 0.35  | 0.35  | 0.35  | 0.351 | 0.353 | 0.355 | 0.355 | 0.354 | 0.354 | 0.355 | 0.357 | 0.359 | 0.364 | 0.374 | 0.387 | 0.398 | 0.403 | 0.407 |
| Antigua and Barbuda              | 0.331 | 0.334 | 0.335 | 0.336 | 0.336 | 0.337 | 0.341 | 0.346 | 0.352 | 0.359 | 0.367 | 0.375 | 0.384 | 0.392 | 0.402 | 0.411 | 0.421 | 0.433 | 0.444 | 0.456 |
| The Bahamas                      | 0.446 | 0.45  | 0.454 | 0.46  | 0.468 | 0.475 | 0.481 | 0.489 | 0.498 | 0.504 | 0.504 | 0.502 | 0.501 | 0.505 | 0.512 | 0.519 | 0.526 | 0.534 | 0.543 | 0.553 |
| Barbados                         | 0.433 | 0.428 | 0.422 | 0.416 | 0.415 | 0.42  | 0.427 | 0.431 | 0.432 | 0.434 | 0.442 | 0.455 | 0.464 | 0.47  | 0.473 | 0.479 | 0.489 | 0.499 | 0.507 | 0.515 |
| Belize                           | 0.274 | 0.276 | 0.276 | 0.275 | 0.274 | 0.272 | 0.27  | 0.267 | 0.264 | 0.261 | 0.258 | 0.255 | 0.253 | 0.252 | 0.252 | 0.254 | 0.259 | 0.264 | 0.269 | 0.273 |
| Bermuda                          | 0.451 | 0.458 | 0.463 | 0.468 | 0.473 | 0.478 | 0.484 | 0.489 | 0.496 | 0.502 | 0.508 | 0.514 | 0.522 | 0.533 | 0.545 | 0.556 | 0.568 | 0.58  | 0.591 | 0.6   |
| Cuba                             | 0.412 | 0.417 | 0.418 | 0.415 | 0.413 | 0.414 | 0.414 | 0.414 | 0.41  | 0.402 | 0.392 | 0.382 | 0.376 | 0.375 | 0.38  | 0.393 | 0.412 | 0.428 | 0.429 | 0.428 |
| Dominica                         | 0.322 | 0.322 | 0.319 | 0.314 | 0.307 | 0.303 | 0.299 | 0.295 | 0.294 | 0.294 | 0.298 | 0.304 | 0.31  | 0.312 | 0.312 | 0.314 | 0.318 | 0.322 | 0.329 | 0.339 |
| Dominican Republic               | 0.208 | 0.213 | 0.215 | 0.215 | 0.214 | 0.217 | 0.221 | 0.225 | 0.227 | 0.228 | 0.234 | 0.244 | 0.25  | 0.251 | 0.253 | 0.258 | 0.267 | 0.275 | 0.281 | 0.285 |
| Grenada                          | 0.227 | 0.225 | 0.222 | 0.217 | 0.211 | 0.207 | 0.206 | 0.21  | 0.22  | 0.232 | 0.246 | 0.26  | 0.273 | 0.284 | 0.295 | 0.303 | 0.311 | 0.317 | 0.323 | 0.329 |
| Guyana                           | 0.28  | 0.282 | 0.284 | 0.285 | 0.285 | 0.285 | 0.285 | 0.285 | 0.286 | 0.287 | 0.291 | 0.297 | 0.305 | 0.313 | 0.323 | 0.335 | 0.348 | 0.362 | 0.374 | 0.384 |
| Haiti                            | 0.206 | 0.208 | 0.211 | 0.214 | 0.217 | 0.22  | 0.223 | 0.226 | 0.23  | 0.233 | 0.237 | 0.24  | 0.244 | 0.248 | 0.251 | 0.254 | 0.258 | 0.261 | 0.264 | 0.267 |
| Jamaica                          | 0.402 | 0.404 | 0.404 | 0.404 | 0.402 | 0.399 | 0.396 | 0.394 | 0.39  | 0.386 | 0.382 | 0.377 | 0.374 | 0.372 | 0.37  | 0.372 | 0.377 | 0.385 | 0.393 | 0.399 |
| Puerto Rico                      | 0.401 | 0.409 | 0.419 | 0.425 | 0.423 | 0.421 | 0.426 | 0.433 | 0.44  | 0.448 | 0.457 | 0.465 | 0.471 | 0.476 | 0.485 | 0.501 | 0.522 | 0.54  | 0.552 | 0.559 |
| Saint Lucia                      | 0.317 | 0.321 | 0.322 | 0.32  | 0.316 | 0.312 | 0.307 | 0.303 | 0.3   | 0.3   | 0.302 | 0.304 | 0.306 | 0.308 | 0.309 | 0.311 | 0.314 | 0.316 | 0.319 | 0.324 |
| Saint Vincent and the Grenadines | 0.26  | 0.258 | 0.252 | 0.238 | 0.22  | 0.199 | 0.18  | 0.171 | 0.169 | 0.173 | 0.185 | 0.202 | 0.213 | 0.216 | 0.218 | 0.226 | 0.24  | 0.255 | 0.266 | 0.271 |
| Suriname                         | 0.314 | 0.311 | 0.309 | 0.308 | 0.308 | 0.309 | 0.309 | 0.307 | 0.306 | 0.306 | 0.309 | 0.318 | 0.335 | 0.349 | 0.356 | 0.361 | 0.366 | 0.371 | 0.377 | 0.385 |
| Trinidad and Tobago              | 0.363 | 0.366 | 0.366 | 0.365 | 0.365 | 0.366 | 0.367 | 0.368 | 0.371 | 0.374 | 0.38  | 0.388 | 0.397 | 0.409 | 0.423 | 0.436 | 0.45  | 0.463 | 0.476 | 0.487 |
| Virgin Islands                   | 0.453 | 0.456 | 0.457 | 0.453 | 0.446 | 0.439 | 0.431 | 0.424 | 0.419 | 0.419 | 0.424 | 0.429 | 0.433 | 0.437 | 0.442 | 0.45  | 0.46  | 0.471 | 0.485 | 0.499 |
| Central Latin America            | 0.275 | 0.277 | 0.28  | 0.282 | 0.285 | 0.288 | 0.292 | 0.294 | 0.296 | 0.298 | 0.301 | 0.306 | 0.311 | 0.316 | 0.322 | 0.329 | 0.336 | 0.344 | 0.353 | 0.36  |
| Colombia                         | 0.28  | 0.281 | 0.283 | 0.285 | 0.287 | 0.287 | 0.287 | 0.287 | 0.287 | 0.287 | 0.288 | 0.291 | 0.296 | 0.301 | 0.308 | 0.315 | 0.324 | 0.333 | 0.342 | 0.351 |
| Costa Rica                       | 0.308 | 0.313 | 0.317 | 0.316 | 0.312 | 0.313 | 0.315 | 0.314 | 0.307 | 0.303 | 0.306 | 0.314 | 0.325 | 0.339 | 0.352 | 0.364 | 0.376 | 0.39  | 0.405 | 0.417 |
| El Salvador                      | 0.22  | 0.222 | 0.224 | 0.226 | 0.228 | 0.23  | 0.233 | 0.236 | 0.239 | 0.242 | 0.245 | 0.249 | 0.253 | 0.257 | 0.262 | 0.267 | 0.272 | 0.278 | 0.284 | 0.29  |
| Guatemala                        | 0.203 | 0.208 | 0.211 | 0.213 | 0.219 | 0.226 | 0.228 | 0.229 | 0.23  | 0.229 | 0.23  | 0.235 | 0.239 | 0.238 | 0.244 | 0.253 | 0.259 | 0.264 | 0.269 | 0.273 |
| Honduras                         | 0.17  | 0.173 | 0.176 | 0.18  | 0.182 | 0.185 | 0.189 | 0.193 | 0.198 | 0.202 | 0.204 | 0.206 | 0.207 | 0.208 | 0.211 | 0.215 | 0.219 | 0.224 | 0.23  | 0.236 |
| Mexico                           | 0.271 | 0.274 | 0.278 | 0.281 | 0.284 | 0.289 | 0.293 | 0.297 | 0.301 | 0.306 | 0.31  | 0.315 | 0.32  | 0.325 | 0.331 | 0.337 | 0.344 | 0.351 | 0.358 | 0.365 |
| Aguascalientes                   | 0.29  | 0.294 | 0.297 | 0.3   | 0.303 | 0.308 | 0.312 | 0.317 | 0.321 | 0.326 | 0.332 | 0.339 | 0.345 | 0.351 | 0.356 | 0.363 | 0.371 | 0.379 | 0.387 | 0.394 |
| Baja California                  | 0.297 | 0.302 | 0.306 | 0.309 | 0.313 | 0.318 | 0.322 | 0.327 | 0.331 | 0.336 | 0.341 | 0.347 | 0.352 | 0.359 | 0.366 | 0.373 | 0.381 | 0.39  | 0.399 | 0.408 |
| Baja California Sur              | 0.303 | 0.307 | 0.31  | 0.313 | 0.317 | 0.321 | 0.325 | 0.329 | 0.332 | 0.336 | 0.34  | 0.345 | 0.35  | 0.356 | 0.361 | 0.368 | 0.375 | 0.383 | 0.392 | 0.4   |
| Campeche                         | 0.267 | 0.271 | 0.275 | 0.278 | 0.282 | 0.286 | 0.29  | 0.294 | 0.297 | 0.301 | 0.304 | 0.308 | 0.311 | 0.315 | 0.32  | 0.324 | 0.33  | 0.335 | 0.341 | 0.346 |
| Chiapas                          | 0.22  | 0.223 | 0.226 | 0.229 | 0.232 | 0.236 | 0.239 | 0.243 | 0.246 | 0.25  | 0.253 | 0.257 | 0.261 | 0.265 | 0.27  | 0.275 | 0.28  | 0.286 | 0.291 | 0.297 |
| Chihuahua                        | 0.271 | 0.275 | 0.279 | 0.282 | 0.286 | 0.29  | 0.294 | 0.299 | 0.303 | 0.307 | 0.312 | 0.318 | 0.323 | 0.329 | 0.335 | 0.342 | 0.349 | 0.357 | 0.365 | 0.373 |
| Coahuila                         | 0.295 | 0.299 | 0.303 | 0.307 | 0.311 | 0.315 | 0.319 | 0.324 | 0.328 | 0.333 | 0.338 | 0.343 | 0.348 | 0.354 | 0.36  | 0.367 | 0.373 | 0.38  | 0.387 | 0.394 |
| Colima                           | 0.272 | 0.275 | 0.279 | 0.282 | 0.286 | 0.291 | 0.295 | 0.299 | 0.304 | 0.308 | 0.314 | 0.319 | 0.325 | 0.33  | 0.337 | 0.344 | 0.351 | 0.358 | 0.366 | 0.373 |
| Mexico City                      | 0.313 | 0.318 | 0.322 | 0.325 | 0.33  | 0.335 | 0.34  | 0.345 | 0.351 | 0.357 | 0.362 | 0.368 | 0.374 | 0.381 | 0.389 | 0.397 | 0.404 | 0.415 | 0.426 | 0.436 |
| Durango                          | 0.253 | 0.256 | 0.259 | 0.262 | 0.265 | 0.269 | 0.273 | 0.277 | 0.281 | 0.285 | 0.29  | 0.296 | 0.301 | 0.306 | 0.312 | 0.319 | 0.326 | 0.333 | 0.339 | 0.346 |
| Guanajuato                       | 0.244 | 0.247 | 0.25  | 0.252 | 0.256 | 0.26  | 0.264 | 0.268 | 0.272 | 0.276 | 0.281 | 0.286 | 0.291 | 0.297 | 0.302 | 0.308 | 0.315 | 0.321 | 0.328 | 0.334 |
| Guerrero                         | 0.203 | 0.207 | 0.21  | 0.213 | 0.216 | 0.22  | 0.224 | 0.228 | 0.232 | 0.236 | 0.24  | 0.244 | 0.249 | 0.253 | 0.259 | 0.264 | 0.27  | 0.276 | 0.282 | 0.287 |
| Hidalgo                          | 0.192 | 0.195 | 0.198 | 0.2   | 0.204 | 0.207 | 0.21  | 0.214 | 0.218 | 0.223 | 0.227 | 0.23  | 0.235 | 0.24  | 0.246 | 0.252 | 0.257 | 0.263 | 0.269 | 0.275 |
| Jalisco                          | 0.278 | 0.282 | 0.286 | 0.289 | 0.293 | 0.298 | 0.303 | 0.307 | 0.312 | 0.317 | 0.323 | 0.329 | 0.335 | 0.341 | 0.347 | 0.354 | 0.361 | 0.368 | 0.375 | 0.382 |
| México                           | 0.272 | 0.276 | 0.279 | 0.282 | 0.286 | 0.29  |       |       |       |       |       |       |       |       |       |       |       |       |       |       |



**Appendix Table 9. Socio-demographic Index values for all estimated GBD 2017 locations, 1950-1969**

| Location                        | 1950  | 1951  | 1952  | 1953  | 1954  | 1955  | 1956  | 1957  | 1958  | 1959  | 1960  | 1961  | 1962  | 1963  | 1964  | 1965  | 1966  | 1967  | 1968  | 1969  |
|---------------------------------|-------|-------|-------|-------|-------|-------|-------|-------|-------|-------|-------|-------|-------|-------|-------|-------|-------|-------|-------|-------|
| Quintana Roo                    | 0.301 | 0.305 | 0.309 | 0.313 | 0.318 | 0.322 | 0.326 | 0.33  | 0.334 | 0.339 | 0.344 | 0.349 | 0.354 | 0.359 | 0.365 | 0.371 | 0.378 | 0.385 | 0.391 | 0.395 |
| San Luis Potosí                 | 0.235 | 0.239 | 0.242 | 0.245 | 0.249 | 0.253 | 0.257 | 0.261 | 0.266 | 0.27  | 0.275 | 0.28  | 0.285 | 0.29  | 0.296 | 0.302 | 0.309 | 0.316 | 0.323 | 0.329 |
| Sinaloa                         | 0.265 | 0.268 | 0.271 | 0.274 | 0.277 | 0.281 | 0.285 | 0.288 | 0.292 | 0.296 | 0.301 | 0.306 | 0.311 | 0.316 | 0.322 | 0.328 | 0.335 | 0.342 | 0.348 | 0.355 |
| Sonora                          | 0.279 | 0.283 | 0.286 | 0.289 | 0.293 | 0.298 | 0.302 | 0.306 | 0.31  | 0.315 | 0.32  | 0.326 | 0.331 | 0.338 | 0.345 | 0.352 | 0.36  | 0.368 | 0.377 | 0.386 |
| Tabasco                         | 0.234 | 0.237 | 0.241 | 0.244 | 0.247 | 0.251 | 0.255 | 0.259 | 0.262 | 0.266 | 0.27  | 0.274 | 0.278 | 0.282 | 0.287 | 0.292 | 0.299 | 0.305 | 0.311 | 0.316 |
| Tamaulipas                      | 0.286 | 0.29  | 0.293 | 0.297 | 0.301 | 0.306 | 0.31  | 0.315 | 0.319 | 0.324 | 0.329 | 0.335 | 0.34  | 0.346 | 0.353 | 0.36  | 0.368 | 0.376 | 0.384 | 0.393 |
| Tlaxcala                        | 0.225 | 0.228 | 0.232 | 0.235 | 0.239 | 0.243 | 0.247 | 0.252 | 0.257 | 0.262 | 0.267 | 0.272 | 0.278 | 0.283 | 0.289 | 0.295 | 0.302 | 0.308 | 0.315 | 0.321 |
| Veracruz de Ignacio de la Llave | 0.236 | 0.24  | 0.244 | 0.247 | 0.25  | 0.255 | 0.258 | 0.263 | 0.267 | 0.271 | 0.275 | 0.279 | 0.283 | 0.288 | 0.294 | 0.299 | 0.305 | 0.311 | 0.317 | 0.323 |
| Yucatán                         | 0.274 | 0.278 | 0.281 | 0.284 | 0.288 | 0.293 | 0.297 | 0.301 | 0.306 | 0.311 | 0.315 | 0.318 | 0.322 | 0.327 | 0.332 | 0.337 | 0.341 | 0.346 | 0.352 | 0.357 |
| Zacatecas                       | 0.221 | 0.225 | 0.227 | 0.23  | 0.233 | 0.237 | 0.24  | 0.244 | 0.248 | 0.252 | 0.258 | 0.263 | 0.269 | 0.274 | 0.28  | 0.287 | 0.294 | 0.301 | 0.307 | 0.313 |
| Nicaragua                       | 0.217 | 0.219 | 0.221 | 0.221 | 0.22  | 0.219 | 0.218 | 0.216 | 0.215 | 0.214 | 0.215 | 0.217 | 0.221 | 0.224 | 0.227 | 0.232 | 0.237 | 0.243 | 0.249 | 0.257 |
| Panama                          | 0.323 | 0.322 | 0.322 | 0.324 | 0.327 | 0.33  | 0.332 | 0.337 | 0.342 | 0.346 | 0.347 | 0.348 | 0.349 | 0.351 | 0.354 | 0.36  | 0.367 | 0.374 | 0.382 | 0.391 |
| Venezuela                       | 0.342 | 0.34  | 0.337 | 0.333 | 0.336 | 0.344 | 0.351 | 0.353 | 0.345 | 0.334 | 0.334 | 0.345 | 0.356 | 0.362 | 0.37  | 0.379 | 0.384 | 0.396 | 0.412 | 0.422 |
| Tropical Latin America          | 0.261 | 0.265 | 0.269 | 0.273 | 0.277 | 0.281 | 0.285 | 0.289 | 0.294 | 0.298 | 0.303 | 0.308 | 0.314 | 0.32  | 0.325 | 0.331 | 0.336 | 0.342 | 0.348 | 0.355 |
| Brazil                          | 0.26  | 0.264 | 0.268 | 0.272 | 0.276 | 0.28  | 0.284 | 0.289 | 0.293 | 0.297 | 0.302 | 0.308 | 0.314 | 0.319 | 0.325 | 0.33  | 0.336 | 0.342 | 0.348 | 0.354 |
| Acre                            | 0.172 | 0.175 | 0.177 | 0.18  | 0.182 | 0.185 | 0.187 | 0.189 | 0.192 | 0.195 | 0.199 | 0.203 | 0.208 | 0.213 | 0.218 | 0.223 | 0.228 | 0.232 | 0.237 | 0.242 |
| Alagoas                         | 0.149 | 0.151 | 0.154 | 0.156 | 0.159 | 0.161 | 0.163 | 0.166 | 0.168 | 0.171 | 0.174 | 0.177 | 0.181 | 0.184 | 0.188 | 0.191 | 0.195 | 0.2   | 0.205 | 0.209 |
| Amapá                           | 0.234 | 0.238 | 0.242 | 0.245 | 0.249 | 0.253 | 0.257 | 0.26  | 0.264 | 0.269 | 0.274 | 0.279 | 0.285 | 0.29  | 0.295 | 0.3   | 0.305 | 0.309 | 0.313 | 0.318 |
| Amazonas                        | 0.189 | 0.192 | 0.195 | 0.198 | 0.201 | 0.203 | 0.206 | 0.208 | 0.211 | 0.214 | 0.218 | 0.223 | 0.229 | 0.234 | 0.24  | 0.245 | 0.251 | 0.256 | 0.262 | 0.268 |
| Bahia                           | 0.184 | 0.187 | 0.19  | 0.193 | 0.196 | 0.2   | 0.203 | 0.206 | 0.209 | 0.213 | 0.217 | 0.222 | 0.226 | 0.231 | 0.235 | 0.24  | 0.244 | 0.248 | 0.252 | 0.256 |
| Ceará                           | 0.194 | 0.197 | 0.2   | 0.202 | 0.206 | 0.209 | 0.212 | 0.216 | 0.219 | 0.223 | 0.228 | 0.233 | 0.238 | 0.243 | 0.248 | 0.253 | 0.258 | 0.263 | 0.268 | 0.273 |
| Distrito Federal                | 0.372 | 0.376 | 0.382 | 0.387 | 0.392 | 0.397 | 0.403 | 0.408 | 0.413 | 0.419 | 0.426 | 0.432 | 0.439 | 0.446 | 0.454 | 0.461 | 0.468 | 0.475 | 0.483 | 0.491 |
| Espírito Santo                  | 0.257 | 0.26  | 0.263 | 0.267 | 0.27  | 0.274 | 0.278 | 0.281 | 0.286 | 0.29  | 0.296 | 0.303 | 0.31  | 0.316 | 0.323 | 0.33  | 0.337 | 0.344 | 0.351 | 0.358 |
| Goiás                           | 0.215 | 0.218 | 0.222 | 0.225 | 0.228 | 0.232 | 0.235 | 0.239 | 0.243 | 0.246 | 0.251 | 0.256 | 0.261 | 0.266 | 0.271 | 0.276 | 0.282 | 0.288 | 0.294 | 0.3   |
| Maranhão                        | 0.127 | 0.129 | 0.132 | 0.134 | 0.136 | 0.138 | 0.14  | 0.142 | 0.144 | 0.147 | 0.15  | 0.154 | 0.158 | 0.162 | 0.167 | 0.17  | 0.173 | 0.176 | 0.179 | 0.183 |
| Mato Grosso                     | 0.232 | 0.235 | 0.238 | 0.242 | 0.245 | 0.248 | 0.252 | 0.255 | 0.258 | 0.262 | 0.266 | 0.27  | 0.275 | 0.28  | 0.285 | 0.29  | 0.296 | 0.302 | 0.31  | 0.318 |
| Mato Grosso do Sul              | 0.229 | 0.232 | 0.235 | 0.237 | 0.24  | 0.243 | 0.246 | 0.249 | 0.253 | 0.256 | 0.262 | 0.268 | 0.274 | 0.28  | 0.286 | 0.292 | 0.299 | 0.306 | 0.314 | 0.321 |
| Minas Gerais                    | 0.26  | 0.264 | 0.268 | 0.272 | 0.276 | 0.28  | 0.284 | 0.288 | 0.293 | 0.297 | 0.302 | 0.307 | 0.313 | 0.318 | 0.323 | 0.329 | 0.334 | 0.339 | 0.345 | 0.351 |
| Pará                            | 0.204 | 0.207 | 0.21  | 0.214 | 0.217 | 0.22  | 0.224 | 0.227 | 0.23  | 0.234 | 0.239 | 0.244 | 0.249 | 0.254 | 0.259 | 0.263 | 0.268 | 0.273 | 0.277 | 0.282 |
| Paraíba                         | 0.172 | 0.175 | 0.178 | 0.181 | 0.184 | 0.187 | 0.19  | 0.192 | 0.195 | 0.198 | 0.202 | 0.206 | 0.21  | 0.214 | 0.218 | 0.221 | 0.225 | 0.229 | 0.234 | 0.238 |
| Paraná                          | 0.267 | 0.27  | 0.274 | 0.278 | 0.282 | 0.286 | 0.29  | 0.294 | 0.298 | 0.302 | 0.306 | 0.311 | 0.315 | 0.32  | 0.324 | 0.328 | 0.333 | 0.339 | 0.345 | 0.351 |
| Pernambuco                      | 0.19  | 0.193 | 0.196 | 0.199 | 0.202 | 0.205 | 0.209 | 0.212 | 0.215 | 0.219 | 0.223 | 0.228 | 0.232 | 0.237 | 0.242 | 0.246 | 0.251 | 0.256 | 0.262 | 0.267 |
| Piauí                           | 0.162 | 0.164 | 0.167 | 0.169 | 0.171 | 0.174 | 0.176 | 0.179 | 0.182 | 0.185 | 0.189 | 0.193 | 0.198 | 0.202 | 0.206 | 0.21  | 0.214 | 0.218 | 0.222 | 0.227 |
| Rio de Janeiro                  | 0.342 | 0.347 | 0.352 | 0.357 | 0.362 | 0.367 | 0.373 | 0.378 | 0.383 | 0.389 | 0.395 | 0.402 | 0.409 | 0.416 | 0.422 | 0.429 | 0.436 | 0.442 | 0.449 | 0.456 |
| Rio Grande do Norte             | 0.184 | 0.187 | 0.19  | 0.193 | 0.196 | 0.199 | 0.202 | 0.205 | 0.208 | 0.211 | 0.215 | 0.219 | 0.223 | 0.227 | 0.231 | 0.235 | 0.24  | 0.244 | 0.25  | 0.254 |
| Rio Grande do Sul               | 0.314 | 0.318 | 0.323 | 0.327 | 0.331 | 0.336 | 0.34  | 0.345 | 0.349 | 0.354 | 0.36  | 0.366 | 0.372 | 0.378 | 0.384 | 0.391 | 0.398 | 0.405 | 0.412 | 0.419 |
| Rondônia                        | 0.199 | 0.202 | 0.205 | 0.207 | 0.21  | 0.214 | 0.216 | 0.219 | 0.222 | 0.226 | 0.23  | 0.235 | 0.241 | 0.246 | 0.251 | 0.256 | 0.262 | 0.267 | 0.272 | 0.278 |
| Roraima                         | 0.205 | 0.208 | 0.212 | 0.215 | 0.219 | 0.222 | 0.225 | 0.228 | 0.232 | 0.236 | 0.241 | 0.246 | 0.252 | 0.258 | 0.263 | 0.269 | 0.275 | 0.28  | 0.285 | 0.29  |
| Santa Catarina                  | 0.296 | 0.3   | 0.304 | 0.308 | 0.312 | 0.316 | 0.32  | 0.325 | 0.329 | 0.334 | 0.34  | 0.347 | 0.353 | 0.359 | 0.365 | 0.371 | 0.378 | 0.384 | 0.39  | 0.397 |
| São Paulo                       | 0.323 | 0.327 | 0.332 | 0.337 | 0.341 | 0.346 | 0.351 | 0.356 | 0.361 | 0.366 | 0.372 | 0.378 | 0.384 | 0.39  | 0.397 | 0.403 | 0.409 | 0.416 | 0.423 | 0.429 |
| Sergipe                         | 0.196 | 0.199 | 0.202 | 0.205 | 0.208 | 0.212 | 0.215 | 0.218 | 0.221 | 0.225 | 0.229 | 0.233 | 0.238 | 0.242 | 0.246 | 0.251 | 0.255 | 0.259 | 0.264 | 0.269 |
| Tocantins                       | 0.175 | 0.178 | 0.181 | 0.185 | 0.188 | 0.191 | 0.193 | 0.196 | 0.199 | 0.202 | 0.205 | 0.209 | 0.214 | 0.218 | 0.222 | 0.226 | 0.229 | 0.232 | 0.236 | 0.239 |
| Paraguay                        | 0.285 | 0.293 | 0.3   | 0.307 | 0.312 | 0.317 | 0.319 | 0.32  | 0.32  | 0.318 | 0.318 | 0.319 | 0.321 | 0.323 | 0.326 | 0.33  | 0.334 | 0.338 | 0.341 | 0.346 |
| North Africa and Middle East    | 0.182 | 0.186 | 0.19  | 0.195 | 0.199 | 0.204 | 0.209 | 0.214 | 0.219 | 0.224 | 0.23  | 0.236 | 0.242 | 0.248 | 0.255 | 0.261 | 0.269 | 0.276 | 0.283 | 0.29  |
| North Africa and Middle East    | 0.182 | 0.186 | 0.19  | 0.195 | 0.199 | 0.204 | 0.209 | 0.214 | 0.219 | 0.224 | 0.23  | 0.236 | 0.242 | 0.248 | 0.255 | 0.261 | 0.269 | 0.276 | 0.283 | 0.29  |
| Afghanistan                     | 0.078 | 0.08  | 0.081 | 0.083 | 0.085 | 0.087 | 0.089 | 0.09  | 0.092 | 0.094 | 0.096 | 0.098 | 0.1   | 0.101 | 0.103 | 0.105 | 0.106 | 0.108 | 0.11  | 0.111 |
| Algeria                         | 0.194 | 0.198 | 0.202 | 0.207 | 0.212 | 0.217 | 0.222 | 0.228 | 0.234 | 0.241 | 0.249 | 0.255 | 0.26  | 0.265 | 0.271 | 0.278 | 0.283 | 0.288 | 0.293 | 0.298 |
| Bahrain                         | 0.226 | 0.232 | 0.238 | 0.244 | 0.25  | 0.257 | 0.264 | 0.272 | 0.28  | 0.289 | 0.298 | 0.309 | 0.321 | 0.334 | 0.347 | 0.36  | 0.372 | 0.384 | 0.393 | 0.404 |
| Egypt                           | 0.178 | 0.182 | 0.186 | 0.189 | 0.191 | 0.193 | 0.196 | 0.198 | 0.201 | 0.204 | 0.209 | 0.215 | 0.221 | 0.227 | 0.234 | 0.242 | 0.25  | 0.259 | 0.267 | 0.275 |
| Iran                            | 0.166 | 0.17  | 0.174 | 0.178 | 0.182 | 0.186 | 0.192 | 0.199 | 0.206 | 0.213 | 0.222 | 0.235 | 0.246 | 0.254 | 0.261 | 0.27  | 0.281 | 0.293 | 0.302 | 0.311 |
| Iraq                            | 0.151 | 0.155 | 0.159 | 0.165 | 0.172 | 0.177 | 0.183 | 0.188 | 0.194 | 0.2   | 0.207 | 0.214 | 0.221 | 0.227 | 0.234 | 0.241 | 0.247 | 0.254 | 0.26  | 0.267 |
| Jordan                          | 0.054 | 0.056 | 0.057 | 0.059 | 0.06  | 0.077 | 0.106 | 0.129 | 0.148 | 0.16  | 0.167 | 0.177 | 0.195 | 0.214 | 0.228 | 0.24  | 0.252 | 0.263 | 0.276 | 0.289 |
| Kuwait                          | 0.278 | 0.286 | 0.294 | 0.303 | 0.311 | 0.319 | 0.328 | 0.334 | 0.337 | 0.336 | 0.336 | 0.332 | 0.324 | 0.321 | 0.327 | 0.331 | 0.33  | 0.328 | 0.345 | 0.38  |
| Lebanon                         | 0.154 | 0.157 | 0.161 | 0.166 | 0.172 | 0.177 | 0.183 | 0.188 | 0.194 | 0.199 | 0.204 | 0.21  | 0.217 | 0.224 | 0.232 | 0.242 | 0.251 | 0.261 | 0.272 | 0.283 |
| Libya                           | 0.183 | 0.19  | 0.198 | 0.204 | 0.211 | 0.219 | 0.227 | 0.236 | 0.243 | 0.25  | 0.259 | 0.267 | 0.275 | 0.281 | 0.288 | 0.296 | 0.304 | 0.312 | 0.32  | 0.323 |
| Morocco                         | 0.136 | 0.138 | 0.141 | 0.144 | 0.146 | 0.149 | 0.152 | 0.154 | 0.157 | 0.16  | 0.163 | 0.167 | 0.172 | 0.177 | 0.183 | 0.189 | 0.195 | 0.202 | 0.209 | 0.216 |
| Palestine                       | 0.097 | 0.101 | 0.105 | 0.109 | 0.114 | 0.118 | 0.123 | 0.129 | 0.134 | 0.14  | 0.147 | 0.153 | 0.16  | 0.167 | 0.175 | 0.183 | 0.191 | 0.198 | 0.206 | 0.215 |
| Oman                            | 0.141 | 0.144 | 0.148 | 0.152 | 0.157 |       |       |       |       |       |       |       |       |       |       |       |       |       |       |       |

**Appendix Table 9. Socio-demographic Index values for all estimated GBD 2017 locations, 1950-1969**

| Location                               | 1950  | 1951  | 1952  | 1953  | 1954  | 1955  | 1956  | 1957  | 1958  | 1959  | 1960  | 1961  | 1962  | 1963  | 1964  | 1965  | 1966  | 1967  | 1968  | 1969  |
|----------------------------------------|-------|-------|-------|-------|-------|-------|-------|-------|-------|-------|-------|-------|-------|-------|-------|-------|-------|-------|-------|-------|
| Yemen                                  | 0.075 | 0.077 | 0.079 | 0.081 | 0.083 | 0.085 | 0.088 | 0.09  | 0.093 | 0.095 | 0.097 | 0.099 | 0.102 | 0.104 | 0.106 | 0.108 | 0.111 | 0.114 | 0.116 | 0.118 |
| South Asia                             | 0.171 | 0.173 | 0.175 | 0.177 | 0.18  | 0.182 | 0.183 | 0.184 | 0.185 | 0.186 | 0.188 | 0.19  | 0.192 | 0.195 | 0.197 | 0.199 | 0.202 | 0.204 | 0.208 | 0.214 |
| South Asia                             | 0.171 | 0.173 | 0.175 | 0.177 | 0.18  | 0.182 | 0.183 | 0.184 | 0.185 | 0.186 | 0.188 | 0.19  | 0.192 | 0.195 | 0.197 | 0.199 | 0.202 | 0.204 | 0.208 | 0.214 |
| Bangladesh                             | 0.045 | 0.046 | 0.046 | 0.047 | 0.047 | 0.047 | 0.048 | 0.048 | 0.048 | 0.049 | 0.049 | 0.05  | 0.05  | 0.051 | 0.051 | 0.052 | 0.053 | 0.053 | 0.053 | 0.054 |
| Bhutan                                 | 0.112 | 0.115 | 0.118 | 0.122 | 0.126 | 0.13  | 0.134 | 0.138 | 0.142 | 0.146 | 0.151 | 0.156 | 0.161 | 0.165 | 0.17  | 0.175 | 0.181 | 0.186 | 0.191 | 0.197 |
| India                                  | 0.175 | 0.177 | 0.18  | 0.182 | 0.185 | 0.187 | 0.189 | 0.189 | 0.19  | 0.191 | 0.194 | 0.196 | 0.199 | 0.201 | 0.204 | 0.206 | 0.209 | 0.212 | 0.215 | 0.22  |
| Andhra Pradesh                         | 0.14  | 0.142 | 0.143 | 0.145 | 0.147 | 0.148 | 0.148 | 0.146 | 0.144 | 0.143 | 0.143 | 0.145 | 0.146 | 0.146 | 0.146 | 0.146 | 0.148 | 0.149 | 0.152 | 0.158 |
| Arunachal Pradesh                      | 0.145 | 0.147 | 0.149 | 0.151 | 0.153 | 0.155 | 0.155 | 0.153 | 0.152 | 0.15  | 0.151 | 0.153 | 0.155 | 0.157 | 0.159 | 0.16  | 0.163 | 0.167 | 0.173 | 0.179 |
| Assam                                  | 0.17  | 0.172 | 0.175 | 0.178 | 0.181 | 0.183 | 0.185 | 0.186 | 0.186 | 0.188 | 0.191 | 0.194 | 0.197 | 0.201 | 0.205 | 0.209 | 0.212 | 0.213 | 0.215 | 0.218 |
| Bihar                                  | 0.153 | 0.155 | 0.157 | 0.159 | 0.162 | 0.164 | 0.166 | 0.167 | 0.168 | 0.17  | 0.172 | 0.174 | 0.177 | 0.179 | 0.181 | 0.183 | 0.185 | 0.187 | 0.189 | 0.193 |
| Chhattisgarh                           | 0.168 | 0.17  | 0.172 | 0.173 | 0.175 | 0.177 | 0.178 | 0.178 | 0.177 | 0.177 | 0.178 | 0.18  | 0.181 | 0.183 | 0.183 | 0.184 | 0.186 | 0.188 | 0.191 | 0.197 |
| Delhi                                  | 0.295 | 0.3   | 0.304 | 0.31  | 0.315 | 0.319 | 0.323 | 0.324 | 0.326 | 0.329 | 0.334 | 0.34  | 0.346 | 0.351 | 0.356 | 0.361 | 0.367 | 0.374 | 0.381 | 0.387 |
| Goa                                    | 0.278 | 0.282 | 0.285 | 0.291 | 0.295 | 0.299 | 0.302 | 0.305 | 0.308 | 0.311 | 0.316 | 0.32  | 0.324 | 0.328 | 0.332 | 0.336 | 0.34  | 0.346 | 0.352 | 0.359 |
| Gujarat                                | 0.189 | 0.192 | 0.194 | 0.197 | 0.2   | 0.202 | 0.204 | 0.206 | 0.207 | 0.208 | 0.211 | 0.214 | 0.217 | 0.22  | 0.223 | 0.226 | 0.229 | 0.231 | 0.235 | 0.239 |
| Haryana                                | 0.192 | 0.194 | 0.197 | 0.199 | 0.202 | 0.204 | 0.206 | 0.207 | 0.208 | 0.209 | 0.212 | 0.214 | 0.216 | 0.217 | 0.217 | 0.219 | 0.222 | 0.226 | 0.231 | 0.237 |
| Himachal Pradesh                       | 0.168 | 0.17  | 0.172 | 0.175 | 0.177 | 0.179 | 0.181 | 0.182 | 0.183 | 0.184 | 0.186 | 0.188 | 0.189 | 0.191 | 0.192 | 0.193 | 0.195 | 0.198 | 0.202 | 0.207 |
| Jammu and Kashmir                      | 0.176 | 0.178 | 0.181 | 0.183 | 0.186 | 0.189 | 0.191 | 0.193 | 0.195 | 0.197 | 0.2   | 0.203 | 0.205 | 0.208 | 0.21  | 0.212 | 0.215 | 0.218 | 0.222 | 0.228 |
| Jharkhand                              | 0.171 | 0.173 | 0.175 | 0.177 | 0.179 | 0.181 | 0.181 | 0.181 | 0.181 | 0.181 | 0.182 | 0.184 | 0.185 | 0.187 | 0.188 | 0.188 | 0.19  | 0.192 | 0.195 | 0.2   |
| Karnataka                              | 0.167 | 0.169 | 0.171 | 0.174 | 0.176 | 0.178 | 0.18  | 0.18  | 0.18  | 0.18  | 0.183 | 0.185 | 0.187 | 0.19  | 0.192 | 0.193 | 0.196 | 0.201 | 0.207 | 0.214 |
| Kerala                                 | 0.231 | 0.235 | 0.238 | 0.244 | 0.248 | 0.252 | 0.256 | 0.259 | 0.263 | 0.267 | 0.272 | 0.277 | 0.281 | 0.286 | 0.291 | 0.296 | 0.3   | 0.305 | 0.308 | 0.312 |
| Madhya Pradesh                         | 0.148 | 0.15  | 0.152 | 0.154 | 0.156 | 0.158 | 0.159 | 0.158 | 0.158 | 0.157 | 0.159 | 0.161 | 0.162 | 0.163 | 0.163 | 0.165 | 0.166 | 0.167 | 0.168 | 0.172 |
| Maharashtra                            | 0.198 | 0.2   | 0.203 | 0.206 | 0.209 | 0.211 | 0.213 | 0.213 | 0.214 | 0.214 | 0.217 | 0.219 | 0.222 | 0.225 | 0.227 | 0.229 | 0.233 | 0.238 | 0.244 | 0.252 |
| Manipur                                | 0.184 | 0.187 | 0.19  | 0.193 | 0.196 | 0.199 | 0.201 | 0.203 | 0.205 | 0.207 | 0.21  | 0.214 | 0.218 | 0.222 | 0.225 | 0.229 | 0.232 | 0.236 | 0.24  | 0.246 |
| Meghalaya                              | 0.168 | 0.171 | 0.174 | 0.177 | 0.18  | 0.183 | 0.185 | 0.186 | 0.187 | 0.188 | 0.191 | 0.195 | 0.198 | 0.201 | 0.204 | 0.207 | 0.21  | 0.214 | 0.218 | 0.224 |
| Mizoram                                | 0.194 | 0.197 | 0.201 | 0.205 | 0.209 | 0.212 | 0.215 | 0.217 | 0.219 | 0.222 | 0.226 | 0.231 | 0.235 | 0.239 | 0.244 | 0.249 | 0.252 | 0.255 | 0.258 | 0.264 |
| Nagaland                               | 0.203 | 0.206 | 0.21  | 0.213 | 0.217 | 0.221 | 0.225 | 0.227 | 0.23  | 0.233 | 0.238 | 0.243 | 0.248 | 0.253 | 0.258 | 0.263 | 0.267 | 0.27  | 0.273 | 0.278 |
| Odisha                                 | 0.147 | 0.149 | 0.151 | 0.153 | 0.155 | 0.157 | 0.158 | 0.159 | 0.16  | 0.16  | 0.162 | 0.165 | 0.167 | 0.169 | 0.171 | 0.173 | 0.175 | 0.178 | 0.181 | 0.185 |
| Punjab                                 | 0.218 | 0.221 | 0.224 | 0.228 | 0.232 | 0.235 | 0.238 | 0.241 | 0.244 | 0.247 | 0.251 | 0.255 | 0.258 | 0.261 | 0.265 | 0.269 | 0.273 | 0.278 | 0.283 | 0.289 |
| Rajasthan                              | 0.131 | 0.132 | 0.134 | 0.136 | 0.138 | 0.14  | 0.14  | 0.14  | 0.14  | 0.139 | 0.141 | 0.143 | 0.144 | 0.146 | 0.147 | 0.147 | 0.149 | 0.152 | 0.156 | 0.161 |
| Sikkim                                 | 0.16  | 0.163 | 0.165 | 0.167 | 0.17  | 0.171 | 0.173 | 0.173 | 0.173 | 0.173 | 0.176 | 0.178 | 0.181 | 0.183 | 0.186 | 0.188 | 0.191 | 0.194 | 0.198 | 0.204 |
| Tamil Nadu                             | 0.189 | 0.192 | 0.194 | 0.198 | 0.201 | 0.203 | 0.205 | 0.207 | 0.208 | 0.21  | 0.213 | 0.216 | 0.219 | 0.222 | 0.225 | 0.228 | 0.23  | 0.233 | 0.238 | 0.244 |
| Telangana                              | 0.151 | 0.153 | 0.155 | 0.157 | 0.16  | 0.161 | 0.162 | 0.163 | 0.163 | 0.163 | 0.165 | 0.167 | 0.168 | 0.17  | 0.171 | 0.172 | 0.174 | 0.176 | 0.179 | 0.184 |
| Tripura                                | 0.164 | 0.167 | 0.17  | 0.173 | 0.176 | 0.178 | 0.179 | 0.178 | 0.177 | 0.176 | 0.179 | 0.182 | 0.185 | 0.189 | 0.192 | 0.194 | 0.198 | 0.201 | 0.206 | 0.212 |
| Uttar Pradesh                          | 0.152 | 0.154 | 0.156 | 0.158 | 0.161 | 0.163 | 0.164 | 0.165 | 0.166 | 0.168 | 0.17  | 0.172 | 0.175 | 0.177 | 0.179 | 0.181 | 0.183 | 0.185 | 0.188 | 0.192 |
| Uttarakhand                            | 0.183 | 0.185 | 0.187 | 0.189 | 0.191 | 0.193 | 0.194 | 0.194 | 0.194 | 0.195 | 0.196 | 0.198 | 0.2   | 0.201 | 0.202 | 0.203 | 0.204 | 0.206 | 0.21  | 0.215 |
| West Bengal                            | 0.19  | 0.193 | 0.196 | 0.199 | 0.202 | 0.204 | 0.205 | 0.205 | 0.204 | 0.204 | 0.207 | 0.21  | 0.213 | 0.217 | 0.22  | 0.223 | 0.226 | 0.226 | 0.227 | 0.231 |
| Union Territories other than Delhi     | 0.236 | 0.24  | 0.243 | 0.245 | 0.249 | 0.252 | 0.253 | 0.254 | 0.253 | 0.253 | 0.256 | 0.259 | 0.262 | 0.265 | 0.267 | 0.269 | 0.273 | 0.277 | 0.283 | 0.291 |
| Nepal                                  | 0.118 | 0.12  | 0.122 | 0.124 | 0.126 | 0.127 | 0.129 | 0.131 | 0.133 | 0.135 | 0.137 | 0.139 | 0.141 | 0.142 | 0.145 | 0.147 | 0.149 | 0.151 | 0.153 | 0.154 |
| Pakistan                               | 0.185 | 0.186 | 0.188 | 0.19  | 0.192 | 0.194 | 0.196 | 0.198 | 0.2   | 0.202 | 0.205 | 0.207 | 0.21  | 0.213 | 0.217 | 0.221 | 0.225 | 0.229 | 0.233 | 0.237 |
| Southeast Asia, East Asia, and Oceania | 0.19  | 0.194 | 0.199 | 0.204 | 0.21  | 0.215 | 0.219 | 0.223 | 0.227 | 0.232 | 0.236 | 0.239 | 0.242 | 0.247 | 0.253 | 0.259 | 0.264 | 0.269 | 0.275 | 0.284 |
| East Asia                              | 0.17  | 0.175 | 0.182 | 0.188 | 0.194 | 0.199 | 0.203 | 0.208 | 0.212 | 0.217 | 0.222 | 0.222 | 0.224 | 0.227 | 0.233 | 0.239 | 0.245 | 0.249 | 0.255 | 0.265 |
| China                                  | 0.165 | 0.171 | 0.177 | 0.183 | 0.189 | 0.194 | 0.198 | 0.202 | 0.207 | 0.212 | 0.216 | 0.216 | 0.218 | 0.221 | 0.226 | 0.233 | 0.238 | 0.242 | 0.248 | 0.258 |
| North Korea                            | 0.259 | 0.257 | 0.26  | 0.268 | 0.276 | 0.283 | 0.29  | 0.297 | 0.304 | 0.311 | 0.318 | 0.325 | 0.331 | 0.339 | 0.345 | 0.352 | 0.361 | 0.37  | 0.379 | 0.389 |
| Taiwan (Province of China)             | 0.345 | 0.345 | 0.357 | 0.366 | 0.368 | 0.371 | 0.381 | 0.39  | 0.391 | 0.392 | 0.397 | 0.4   | 0.406 | 0.418 | 0.43  | 0.443 | 0.456 | 0.467 | 0.474 | 0.479 |
| Oceania                                | 0.253 | 0.257 | 0.26  | 0.263 | 0.266 | 0.27  | 0.273 | 0.276 | 0.279 | 0.283 | 0.286 | 0.29  | 0.294 | 0.298 | 0.303 | 0.307 | 0.312 | 0.316 | 0.32  | 0.325 |
| American Samoa                         | 0.452 | 0.458 | 0.465 | 0.471 | 0.477 | 0.483 | 0.488 | 0.491 | 0.493 | 0.495 | 0.497 | 0.497 | 0.497 | 0.497 | 0.498 | 0.501 | 0.505 | 0.512 | 0.52  | 0.529 |
| Federated States of Micronesia         | 0.249 | 0.251 | 0.254 | 0.257 | 0.26  | 0.262 | 0.265 | 0.269 | 0.272 | 0.275 | 0.278 | 0.282 | 0.285 | 0.289 | 0.294 | 0.298 | 0.303 | 0.308 | 0.313 | 0.319 |
| Fiji                                   | 0.313 | 0.315 | 0.317 | 0.32  | 0.321 | 0.323 | 0.324 | 0.326 | 0.328 | 0.331 | 0.335 | 0.341 | 0.348 | 0.358 | 0.369 | 0.377 | 0.386 | 0.394 | 0.402 | 0.409 |
| Guam                                   | 0.551 | 0.549 | 0.542 | 0.531 | 0.517 | 0.501 | 0.487 | 0.478 | 0.467 | 0.458 | 0.463 | 0.482 | 0.505 | 0.526 | 0.544 | 0.559 | 0.573 | 0.583 | 0.59  | 0.592 |
| Kiribati                               | 0.249 | 0.251 | 0.253 | 0.255 | 0.257 | 0.259 | 0.261 | 0.264 | 0.266 | 0.268 | 0.27  | 0.274 | 0.277 | 0.281 | 0.285 | 0.289 | 0.293 | 0.297 | 0.301 | 0.306 |
| Marshall Islands                       | 0.221 | 0.224 | 0.227 | 0.229 | 0.232 | 0.235 | 0.237 | 0.24  | 0.242 | 0.244 | 0.247 | 0.249 | 0.252 | 0.254 | 0.256 | 0.258 | 0.26  | 0.262 | 0.264 | 0.267 |
| Northern Mariana Islands               | 0.457 | 0.463 | 0.47  | 0.476 | 0.483 | 0.489 | 0.496 | 0.503 | 0.51  | 0.517 | 0.524 | 0.531 | 0.538 | 0.544 | 0.549 | 0.554 | 0.56  | 0.566 | 0.572 | 0.578 |
| Papua New Guinea                       | 0.186 | 0.189 | 0.192 | 0.195 | 0.199 | 0.202 | 0.205 | 0.209 | 0.212 | 0.215 | 0.218 | 0.221 | 0.224 | 0.227 | 0.231 | 0.234 | 0.238 | 0.242 | 0.246 | 0.25  |
| Samoa                                  | 0.311 | 0.315 | 0.318 | 0.32  | 0.322 | 0.324 | 0.327 | 0.331 | 0.335 | 0.34  | 0.346 | 0.353 | 0.361 | 0.368 | 0.374 | 0.38  | 0.386 | 0.393 | 0.398 | 0.403 |
| Solomon Islands                        | 0.181 | 0.183 | 0.185 | 0.187 | 0.19  | 0.192 | 0.195 | 0.197 | 0.2   | 0.203 | 0.206 | 0.209 | 0.212 | 0.216 | 0.22  | 0.223 | 0.227 | 0.231 | 0.235 | 0.238 |
| Tonga                                  | 0.278 | 0.282 | 0.287 | 0.292 | 0.297 | 0.302 | 0.307 | 0.313 | 0.318 | 0.322 | 0.328 | 0.333 | 0.339 | 0.344 | 0.349 | 0.354 | 0.359 | 0.363 | 0.368 | 0.372 |
| Vanuatu                                | 0.216 | 0.218 | 0.221 | 0.224 | 0.227 | 0.23  | 0.234 | 0.237 | 0.241 | 0.244 | 0.248 | 0.251 | 0.256 | 0.26  | 0.265 | 0.269 | 0.274 | 0.278 | 0.283 | 0.287 |
| Southeast Asia                         | 0.216 | 0.22  | 0.224 | 0.22  |       |       |       |       |       |       |       |       |       |       |       |       |       |       |       |       |

**Appendix Table 9. Socio-demographic Index values for all estimated GBD 2017 locations, 1950-1969**

| Location                   | 1950  | 1951  | 1952  | 1953  | 1954  | 1955  | 1956  | 1957  | 1958  | 1959  | 1960  | 1961  | 1962  | 1963  | 1964  | 1965  | 1966  | 1967  | 1968  | 1969  |
|----------------------------|-------|-------|-------|-------|-------|-------|-------|-------|-------|-------|-------|-------|-------|-------|-------|-------|-------|-------|-------|-------|
| Philippines                | 0.298 | 0.304 | 0.31  | 0.317 | 0.324 | 0.33  | 0.336 | 0.343 | 0.352 | 0.36  | 0.367 | 0.374 | 0.382 | 0.388 | 0.393 | 0.398 | 0.402 | 0.406 | 0.41  | 0.414 |
| Sri Lanka                  | 0.28  | 0.286 | 0.29  | 0.295 | 0.3   | 0.305 | 0.309 | 0.313 | 0.316 | 0.32  | 0.324 | 0.328 | 0.333 | 0.339 | 0.345 | 0.352 | 0.36  | 0.368 | 0.375 | 0.38  |
| Seychelles                 | 0.297 | 0.302 | 0.305 | 0.307 | 0.309 | 0.31  | 0.311 | 0.313 | 0.314 | 0.315 | 0.316 | 0.316 | 0.318 | 0.321 | 0.325 | 0.329 | 0.333 | 0.339 | 0.345 | 0.351 |
| Thailand                   | 0.245 | 0.249 | 0.252 | 0.256 | 0.259 | 0.263 | 0.267 | 0.271 | 0.276 | 0.281 | 0.286 | 0.291 | 0.296 | 0.302 | 0.309 | 0.315 | 0.322 | 0.328 | 0.333 | 0.338 |
| Timor-Leste                | 0.082 | 0.085 | 0.089 | 0.092 | 0.095 | 0.098 | 0.102 | 0.105 | 0.108 | 0.113 | 0.117 | 0.12  | 0.125 | 0.129 | 0.134 | 0.139 | 0.144 | 0.149 | 0.155 | 0.161 |
| Vietnam                    | 0.194 | 0.197 | 0.201 | 0.205 | 0.209 | 0.213 | 0.217 | 0.221 | 0.226 | 0.23  | 0.235 | 0.24  | 0.246 | 0.252 | 0.258 | 0.264 | 0.269 | 0.273 | 0.276 | 0.28  |
| Sub-Saharan Africa         | 0.14  | 0.143 | 0.146 | 0.149 | 0.152 | 0.155 | 0.158 | 0.161 | 0.165 | 0.168 | 0.172 | 0.176 | 0.18  | 0.184 | 0.188 | 0.191 | 0.195 | 0.199 | 0.203 | 0.207 |
| Central sub-Saharan Africa | 0.118 | 0.121 | 0.123 | 0.126 | 0.128 | 0.13  | 0.132 | 0.135 | 0.137 | 0.139 | 0.142 | 0.144 | 0.148 | 0.151 | 0.154 | 0.158 | 0.163 | 0.167 | 0.172 | 0.176 |
| Angola                     | 0.11  | 0.111 | 0.112 | 0.113 | 0.112 | 0.112 | 0.111 | 0.11  | 0.11  | 0.11  | 0.11  | 0.11  | 0.111 | 0.111 | 0.111 | 0.111 | 0.113 | 0.115 | 0.118 | 0.122 |
| Central African Republic   | 0.107 | 0.11  | 0.112 | 0.114 | 0.116 | 0.118 | 0.121 | 0.122 | 0.124 | 0.126 | 0.128 | 0.131 | 0.134 | 0.135 | 0.137 | 0.139 | 0.143 | 0.145 | 0.147 | 0.149 |
| Congo (Brazzaville)        | 0.137 | 0.14  | 0.144 | 0.147 | 0.151 | 0.155 | 0.158 | 0.162 | 0.166 | 0.17  | 0.174 | 0.179 | 0.183 | 0.188 | 0.193 | 0.197 | 0.202 | 0.207 | 0.211 | 0.216 |
| DR Congo                   | 0.111 | 0.114 | 0.117 | 0.12  | 0.123 | 0.126 | 0.129 | 0.132 | 0.135 | 0.138 | 0.141 | 0.143 | 0.147 | 0.151 | 0.154 | 0.158 | 0.163 | 0.167 | 0.172 | 0.177 |
| Equatorial Guinea          | 0.055 | 0.057 | 0.057 | 0.057 | 0.056 | 0.053 | 0.049 | 0.04  | 0.032 | 0.033 | 0.034 | 0.036 | 0.037 | 0.039 | 0.04  | 0.042 | 0.043 | 0.045 | 0.046 | 0.048 |
| Gabon                      | 0.146 | 0.149 | 0.153 | 0.156 | 0.159 | 0.162 | 0.165 | 0.169 | 0.173 | 0.177 | 0.182 | 0.188 | 0.194 | 0.201 | 0.208 | 0.216 | 0.226 | 0.234 | 0.24  | 0.245 |
| Eastern sub-Saharan Africa | 0.099 | 0.102 | 0.103 | 0.105 | 0.107 | 0.11  | 0.112 | 0.115 | 0.118 | 0.12  | 0.123 | 0.126 | 0.129 | 0.133 | 0.135 | 0.138 | 0.141 | 0.144 | 0.148 | 0.152 |
| Burundi                    | 0.081 | 0.084 | 0.086 | 0.088 | 0.09  | 0.093 | 0.095 | 0.098 | 0.101 | 0.104 | 0.107 | 0.11  | 0.113 | 0.116 | 0.119 | 0.122 | 0.125 | 0.129 | 0.133 | 0.136 |
| Comoros                    | 0.131 | 0.133 | 0.134 | 0.135 | 0.136 | 0.137 | 0.137 | 0.137 | 0.138 | 0.139 | 0.14  | 0.141 | 0.143 | 0.145 | 0.147 | 0.148 | 0.149 | 0.15  | 0.151 | 0.153 |
| Djibouti                   | 0.14  | 0.142 | 0.145 | 0.147 | 0.15  | 0.154 | 0.158 | 0.163 | 0.167 | 0.17  | 0.172 | 0.174 | 0.176 | 0.178 | 0.18  | 0.181 | 0.184 | 0.187 | 0.19  | 0.194 |
| Eritrea                    | 0.053 | 0.056 | 0.058 | 0.06  | 0.063 | 0.066 | 0.069 | 0.071 | 0.074 | 0.077 | 0.08  | 0.084 | 0.087 | 0.09  | 0.094 | 0.097 | 0.101 | 0.104 | 0.108 | 0.112 |
| Ethiopia                   | 0.053 | 0.055 | 0.057 | 0.059 | 0.06  | 0.062 | 0.064 | 0.066 | 0.067 | 0.069 | 0.071 | 0.073 | 0.076 | 0.078 | 0.079 | 0.08  | 0.082 | 0.084 | 0.086 | 0.087 |
| Kenya                      | 0.08  | 0.085 | 0.089 | 0.094 | 0.099 | 0.104 | 0.11  | 0.116 | 0.122 | 0.126 | 0.13  | 0.134 | 0.14  | 0.146 | 0.151 | 0.155 | 0.161 | 0.169 | 0.179 | 0.19  |
| Baringo                    | 0.052 | 0.058 | 0.063 | 0.069 | 0.075 | 0.081 | 0.088 | 0.094 | 0.099 | 0.102 | 0.104 | 0.107 | 0.111 | 0.116 | 0.117 | 0.116 | 0.118 | 0.125 | 0.135 | 0.145 |
| Bomet                      | 0.047 | 0.048 | 0.049 | 0.05  | 0.051 | 0.052 | 0.053 | 0.054 | 0.055 | 0.056 | 0.057 | 0.058 | 0.059 | 0.06  | 0.061 | 0.062 | 0.063 | 0.087 | 0.112 | 0.133 |
| Bungoma                    | 0.047 | 0.049 | 0.05  | 0.05  | 0.052 | 0.053 | 0.055 | 0.057 | 0.082 | 0.088 | 0.094 | 0.101 | 0.109 | 0.117 | 0.123 | 0.127 | 0.133 | 0.143 | 0.156 | 0.169 |
| Busia                      | 0.049 | 0.05  | 0.051 | 0.052 | 0.053 | 0.054 | 0.055 | 0.056 | 0.066 | 0.071 | 0.074 | 0.08  | 0.088 | 0.101 | 0.111 | 0.12  | 0.129 | 0.143 | 0.159 | 0.175 |
| Elgeyo Marakwet            | 0.057 | 0.061 | 0.065 | 0.069 | 0.074 | 0.078 | 0.084 | 0.089 | 0.094 | 0.097 | 0.1   | 0.103 | 0.108 | 0.112 | 0.116 | 0.118 | 0.123 | 0.131 | 0.141 | 0.152 |
| Embu                       | 0.095 | 0.1   | 0.103 | 0.107 | 0.111 | 0.116 | 0.12  | 0.126 | 0.131 | 0.136 | 0.141 | 0.146 | 0.151 | 0.157 | 0.163 | 0.168 | 0.174 | 0.182 | 0.191 | 0.2   |
| Garissa                    | 0.042 | 0.044 | 0.045 | 0.046 | 0.048 | 0.05  | 0.052 | 0.054 | 0.055 | 0.057 | 0.058 | 0.06  | 0.062 | 0.064 | 0.066 | 0.068 | 0.07  | 0.075 | 0.079 | 0.085 |
| Homa Bay                   | 0.041 | 0.042 | 0.043 | 0.044 | 0.045 | 0.046 | 0.047 | 0.048 | 0.049 | 0.049 | 0.05  | 0.051 | 0.052 | 0.053 | 0.054 | 0.055 | 0.061 | 0.09  | 0.113 | 0.132 |
| Isiolo                     | 0.101 | 0.104 | 0.106 | 0.109 | 0.112 | 0.115 | 0.118 | 0.122 | 0.126 | 0.129 | 0.132 | 0.135 | 0.139 | 0.143 | 0.148 | 0.152 | 0.157 | 0.164 | 0.172 | 0.18  |
| Kajiado                    | 0.149 | 0.155 | 0.159 | 0.163 | 0.168 | 0.173 | 0.179 | 0.184 | 0.19  | 0.194 | 0.198 | 0.202 | 0.207 | 0.212 | 0.215 | 0.218 | 0.222 | 0.228 | 0.235 | 0.243 |
| Kakamega                   | 0.047 | 0.049 | 0.049 | 0.05  | 0.051 | 0.052 | 0.066 | 0.077 | 0.086 | 0.092 | 0.097 | 0.104 | 0.111 | 0.119 | 0.126 | 0.131 | 0.138 | 0.149 | 0.162 | 0.175 |
| Kericho                    | 0.041 | 0.043 | 0.043 | 0.044 | 0.045 | 0.046 | 0.047 | 0.052 | 0.062 | 0.066 | 0.069 | 0.074 | 0.081 | 0.088 | 0.092 | 0.095 | 0.1   | 0.112 | 0.125 | 0.137 |
| Kiambu                     | 0.099 | 0.106 | 0.112 | 0.118 | 0.125 | 0.133 | 0.141 | 0.149 | 0.156 | 0.163 | 0.169 | 0.176 | 0.183 | 0.191 | 0.197 | 0.203 | 0.21  | 0.22  | 0.231 | 0.244 |
| Kilifi                     | 0.098 | 0.102 | 0.104 | 0.107 | 0.11  | 0.113 | 0.117 | 0.121 | 0.124 | 0.126 | 0.129 | 0.132 | 0.135 | 0.139 | 0.141 | 0.143 | 0.146 | 0.151 | 0.158 | 0.165 |
| Kirinyaga                  | 0.072 | 0.077 | 0.081 | 0.084 | 0.089 | 0.094 | 0.1   | 0.106 | 0.111 | 0.115 | 0.12  | 0.125 | 0.13  | 0.137 | 0.144 | 0.151 | 0.159 | 0.17  | 0.183 | 0.196 |
| Kisii                      | 0.058 | 0.062 | 0.066 | 0.07  | 0.075 | 0.08  | 0.086 | 0.092 | 0.098 | 0.102 | 0.107 | 0.112 | 0.118 | 0.125 | 0.131 | 0.135 | 0.142 | 0.152 | 0.163 | 0.175 |
| Kisumu                     | 0.043 | 0.045 | 0.046 | 0.046 | 0.047 | 0.048 | 0.049 | 0.058 | 0.066 | 0.067 | 0.069 | 0.073 | 0.08  | 0.088 | 0.094 | 0.097 | 0.105 | 0.119 | 0.135 | 0.15  |
| Kitui                      | 0.063 | 0.067 | 0.069 | 0.072 | 0.075 | 0.079 | 0.083 | 0.087 | 0.091 | 0.094 | 0.098 | 0.102 | 0.107 | 0.113 | 0.119 | 0.124 | 0.13  | 0.139 | 0.149 | 0.158 |
| Kwale                      | 0.08  | 0.083 | 0.085 | 0.087 | 0.089 | 0.092 | 0.095 | 0.098 | 0.101 | 0.104 | 0.106 | 0.109 | 0.112 | 0.116 | 0.12  | 0.124 | 0.129 | 0.136 | 0.144 | 0.154 |
| Laikipia                   | 0.038 | 0.04  | 0.041 | 0.045 | 0.053 | 0.06  | 0.067 | 0.074 | 0.08  | 0.083 | 0.087 | 0.091 | 0.096 | 0.103 | 0.108 | 0.111 | 0.118 | 0.129 | 0.142 | 0.155 |
| Lamu                       | 0.04  | 0.041 | 0.044 | 0.049 | 0.054 | 0.059 | 0.064 | 0.07  | 0.075 | 0.076 | 0.077 | 0.079 | 0.083 | 0.088 | 0.092 | 0.092 | 0.097 | 0.108 | 0.121 | 0.134 |
| Machakos                   | 0.085 | 0.09  | 0.093 | 0.097 | 0.101 | 0.106 | 0.111 | 0.117 | 0.122 | 0.126 | 0.13  | 0.135 | 0.141 | 0.147 | 0.152 | 0.157 | 0.163 | 0.172 | 0.184 | 0.196 |
| Makueni                    | 0.075 | 0.078 | 0.081 | 0.085 | 0.089 | 0.094 | 0.099 | 0.104 | 0.109 | 0.113 | 0.117 | 0.122 | 0.128 | 0.135 | 0.142 | 0.148 | 0.155 | 0.166 | 0.178 | 0.19  |
| Mandera                    | 0.03  | 0.031 | 0.032 | 0.033 | 0.034 | 0.036 | 0.037 | 0.039 | 0.04  | 0.04  | 0.041 | 0.041 | 0.042 | 0.044 | 0.045 | 0.046 | 0.047 | 0.052 | 0.057 | 0.063 |
| Marsabit                   | 0.085 | 0.089 | 0.09  | 0.092 | 0.094 | 0.097 | 0.1   | 0.103 | 0.105 | 0.108 | 0.11  | 0.112 | 0.115 | 0.118 | 0.121 | 0.124 | 0.128 | 0.133 | 0.139 | 0.145 |
| Meru                       | 0.088 | 0.093 | 0.096 | 0.099 | 0.104 | 0.108 | 0.113 | 0.118 | 0.123 | 0.127 | 0.131 | 0.135 | 0.14  | 0.145 | 0.15  | 0.154 | 0.16  | 0.168 | 0.177 | 0.187 |
| Migori                     | 0.041 | 0.042 | 0.043 | 0.044 | 0.045 | 0.046 | 0.047 | 0.048 | 0.049 | 0.05  | 0.051 | 0.052 | 0.053 | 0.062 | 0.072 | 0.075 | 0.086 | 0.103 | 0.12  | 0.136 |
| Mombasa                    | 0.103 | 0.111 | 0.113 | 0.116 | 0.12  | 0.125 | 0.13  | 0.136 | 0.141 | 0.146 | 0.151 | 0.156 | 0.162 | 0.168 | 0.174 | 0.18  | 0.187 | 0.195 | 0.204 | 0.214 |
| Murang'a                   | 0.098 | 0.104 | 0.109 | 0.115 | 0.121 | 0.128 | 0.135 | 0.142 | 0.149 | 0.154 | 0.159 | 0.165 | 0.171 | 0.178 | 0.183 | 0.188 | 0.193 | 0.202 | 0.211 | 0.221 |
| Nairobi                    | 0.13  | 0.14  | 0.146 | 0.151 | 0.159 | 0.167 | 0.176 | 0.185 | 0.194 | 0.202 | 0.21  | 0.219 | 0.228 | 0.237 | 0.246 | 0.254 | 0.265 | 0.277 | 0.289 | 0.302 |
| Nakuru                     | 0.076 | 0.083 | 0.085 | 0.088 | 0.092 | 0.097 | 0.102 | 0.108 | 0.113 | 0.117 | 0.122 | 0.126 | 0.131 | 0.137 | 0.142 | 0.146 | 0.151 | 0.159 | 0.167 | 0.175 |
| Nandi                      | 0.066 | 0.072 | 0.077 | 0.083 | 0.089 | 0.095 | 0.102 | 0.109 | 0.115 | 0.118 | 0.122 | 0.126 | 0.131 | 0.136 | 0.139 | 0.14  | 0.143 | 0.151 | 0.16  | 0.17  |
| Narok                      | 0.041 | 0.042 | 0.043 | 0.044 | 0.045 | 0.046 | 0.047 | 0.047 | 0.048 | 0.049 | 0.05  | 0.051 | 0.052 | 0.053 | 0.053 | 0.054 | 0.055 | 0.056 | 0.057 | 0.076 |
| Nyamira                    | 0.042 | 0.043 | 0.044 | 0.05  | 0.058 | 0.065 | 0.073 | 0.081 | 0.087 | 0.091 | 0.096 | 0.102 | 0.11  | 0.118 | 0.125 | 0.131 | 0.141 | 0.153 | 0.167 | 0.181 |
| Nyandarua                  | 0.045 | 0.047 | 0.048 | 0.048 | 0.05  | 0.051 | 0.052 | 0.053 | 0.054 | 0.055 | 0.056 | 0.057 | 0.063 | 0.079 | 0.091 | 0.101 | 0.113 | 0.131 | 0.149 | 0.167 |
| Nyeri                      | 0.077 | 0.084 | 0.088 | 0.094 | 0.1   | 0.106 | 0.113 | 0.12  | 0.126 | 0.131 | 0.136 | 0.142 | 0.148 | 0.156 | 0.163 | 0.168 | 0.176 | 0.188 | 0.201 | 0.215 |
| Samburu                    | 0.043 | 0.045 | 0.047 | 0.05  | 0.053 | 0.057 | 0.    |       |       |       |       |       |       |       |       |       |       |       |       |       |

**Appendix Table 9. Socio-demographic Index values for all estimated GBD 2017 locations, 1950-1969**

| Location                    | 1950  | 1951  | 1952  | 1953  | 1954  | 1955  | 1956  | 1957  | 1958  | 1959  | 1960  | 1961  | 1962  | 1963  | 1964  | 1965  | 1966  | 1967  | 1968  | 1969  |
|-----------------------------|-------|-------|-------|-------|-------|-------|-------|-------|-------|-------|-------|-------|-------|-------|-------|-------|-------|-------|-------|-------|
| Vihiga                      | 0.064 | 0.071 | 0.078 | 0.085 | 0.092 | 0.099 | 0.107 | 0.114 | 0.121 | 0.126 | 0.13  | 0.136 | 0.142 | 0.148 | 0.154 | 0.158 | 0.164 | 0.173 | 0.184 | 0.195 |
| Wajir                       | 0.041 | 0.042 | 0.043 | 0.044 | 0.046 | 0.048 | 0.049 | 0.051 | 0.053 | 0.053 | 0.054 | 0.055 | 0.057 | 0.059 | 0.06  | 0.06  | 0.061 | 0.065 | 0.07  | 0.075 |
| West Pokot                  | 0.064 | 0.067 | 0.069 | 0.072 | 0.075 | 0.078 | 0.082 | 0.086 | 0.089 | 0.092 | 0.094 | 0.097 | 0.1   | 0.104 | 0.107 | 0.109 | 0.113 | 0.119 | 0.126 | 0.133 |
| Madagascar                  | 0.125 | 0.127 | 0.128 | 0.129 | 0.13  | 0.132 | 0.134 | 0.136 | 0.138 | 0.141 | 0.142 | 0.144 | 0.146 | 0.147 | 0.147 | 0.147 | 0.147 | 0.148 | 0.15  | 0.153 |
| Malawi                      | 0.067 | 0.068 | 0.069 | 0.071 | 0.072 | 0.074 | 0.076 | 0.078 | 0.081 | 0.083 | 0.085 | 0.088 | 0.091 | 0.093 | 0.096 | 0.099 | 0.103 | 0.107 | 0.111 | 0.115 |
| Mozambique                  | 0.054 | 0.056 | 0.057 | 0.059 | 0.061 | 0.063 | 0.064 | 0.066 | 0.069 | 0.071 | 0.074 | 0.076 | 0.079 | 0.082 | 0.085 | 0.088 | 0.09  | 0.093 | 0.096 | 0.1   |
| Rwanda                      | 0.113 | 0.115 | 0.118 | 0.12  | 0.123 | 0.126 | 0.128 | 0.131 | 0.134 | 0.138 | 0.142 | 0.146 | 0.152 | 0.157 | 0.159 | 0.16  | 0.16  | 0.162 | 0.165 | 0.17  |
| Somalia                     | 0.079 | 0.08  | 0.082 | 0.084 | 0.085 | 0.087 | 0.089 | 0.091 | 0.093 | 0.095 | 0.096 | 0.099 | 0.101 | 0.103 | 0.104 | 0.105 | 0.107 | 0.109 | 0.111 | 0.112 |
| South Sudan                 | 0.104 | 0.106 | 0.107 | 0.109 | 0.11  | 0.112 | 0.113 | 0.115 | 0.116 | 0.118 | 0.12  | 0.121 | 0.123 | 0.125 | 0.127 | 0.129 | 0.13  | 0.132 | 0.134 | 0.136 |
| Tanzania                    | 0.101 | 0.105 | 0.107 | 0.11  | 0.113 | 0.116 | 0.119 | 0.122 | 0.125 | 0.128 | 0.132 | 0.135 | 0.138 | 0.141 | 0.144 | 0.147 | 0.15  | 0.153 | 0.155 | 0.158 |
| Uganda                      | 0.085 | 0.085 | 0.084 | 0.083 | 0.083 | 0.082 | 0.082 | 0.082 | 0.083 | 0.084 | 0.084 | 0.085 | 0.087 | 0.089 | 0.091 | 0.093 | 0.094 | 0.097 | 0.099 | 0.101 |
| Zambia                      | 0.135 | 0.138 | 0.142 | 0.145 | 0.149 | 0.153 | 0.157 | 0.161 | 0.164 | 0.169 | 0.174 | 0.179 | 0.184 | 0.189 | 0.195 | 0.201 | 0.208 | 0.215 | 0.222 | 0.23  |
| Southern sub-Saharan Africa | 0.277 | 0.282 | 0.287 | 0.293 | 0.298 | 0.304 | 0.31  | 0.316 | 0.321 | 0.327 | 0.332 | 0.338 | 0.344 | 0.349 | 0.355 | 0.36  | 0.365 | 0.372 | 0.378 | 0.384 |
| Botswana                    | 0.166 | 0.17  | 0.174 | 0.178 | 0.182 | 0.187 | 0.191 | 0.196 | 0.2   | 0.205 | 0.209 | 0.213 | 0.217 | 0.221 | 0.225 | 0.228 | 0.232 | 0.237 | 0.242 | 0.247 |
| Lesotho                     | 0.126 | 0.131 | 0.135 | 0.139 | 0.143 | 0.147 | 0.152 | 0.156 | 0.16  | 0.165 | 0.17  | 0.174 | 0.179 | 0.185 | 0.192 | 0.197 | 0.202 | 0.208 | 0.212 | 0.217 |
| Namibia                     | 0.215 | 0.219 | 0.224 | 0.228 | 0.233 | 0.238 | 0.244 | 0.249 | 0.254 | 0.26  | 0.266 | 0.271 | 0.277 | 0.283 | 0.29  | 0.297 | 0.303 | 0.308 | 0.313 | 0.318 |
| South Africa                | 0.31  | 0.316 | 0.321 | 0.326 | 0.332 | 0.339 | 0.345 | 0.351 | 0.356 | 0.362 | 0.368 | 0.374 | 0.38  | 0.385 | 0.391 | 0.396 | 0.402 | 0.409 | 0.416 | 0.422 |
| Swaziland                   | 0.166 | 0.171 | 0.175 | 0.179 | 0.184 | 0.188 | 0.193 | 0.198 | 0.203 | 0.208 | 0.215 | 0.222 | 0.231 | 0.239 | 0.248 | 0.257 | 0.264 | 0.269 | 0.274 | 0.278 |
| Zimbabwe                    | 0.152 | 0.157 | 0.161 | 0.166 | 0.17  | 0.175 | 0.18  | 0.185 | 0.19  | 0.195 | 0.201 | 0.206 | 0.211 | 0.216 | 0.22  | 0.225 | 0.229 | 0.233 | 0.237 | 0.241 |
| Western sub-Saharan Africa  | 0.131 | 0.134 | 0.137 | 0.14  | 0.144 | 0.147 | 0.15  | 0.153 | 0.157 | 0.161 | 0.165 | 0.169 | 0.173 | 0.177 | 0.182 | 0.186 | 0.189 | 0.193 | 0.196 | 0.201 |
| Benin                       | 0.098 | 0.1   | 0.102 | 0.104 | 0.106 | 0.109 | 0.111 | 0.113 | 0.116 | 0.119 | 0.122 | 0.124 | 0.127 | 0.129 | 0.131 | 0.134 | 0.137 | 0.14  | 0.142 | 0.145 |
| Burkina Faso                | 0.056 | 0.058 | 0.06  | 0.062 | 0.064 | 0.066 | 0.068 | 0.071 | 0.073 | 0.076 | 0.078 | 0.08  | 0.083 | 0.085 | 0.087 | 0.088 | 0.089 | 0.09  | 0.092 | 0.094 |
| Cameroon                    | 0.128 | 0.132 | 0.136 | 0.14  | 0.145 | 0.149 | 0.154 | 0.159 | 0.164 | 0.17  | 0.175 | 0.18  | 0.185 | 0.19  | 0.194 | 0.199 | 0.203 | 0.206 | 0.209 | 0.212 |
| Cape Verde                  | 0.123 | 0.124 | 0.125 | 0.125 | 0.126 | 0.127 | 0.128 | 0.128 | 0.13  | 0.133 | 0.136 | 0.14  | 0.144 | 0.147 | 0.152 | 0.157 | 0.163 | 0.17  | 0.177 | 0.185 |
| Chad                        | 0.064 | 0.065 | 0.067 | 0.068 | 0.07  | 0.071 | 0.073 | 0.075 | 0.076 | 0.078 | 0.08  | 0.081 | 0.083 | 0.085 | 0.086 | 0.088 | 0.089 | 0.091 | 0.092 | 0.093 |
| Cote d'Ivoire               | 0.113 | 0.116 | 0.118 | 0.121 | 0.124 | 0.127 | 0.13  | 0.134 | 0.137 | 0.141 | 0.145 | 0.149 | 0.153 | 0.158 | 0.162 | 0.166 | 0.171 | 0.175 | 0.18  | 0.184 |
| The Gambia                  | 0.099 | 0.101 | 0.104 | 0.106 | 0.109 | 0.111 | 0.114 | 0.117 | 0.119 | 0.123 | 0.126 | 0.129 | 0.132 | 0.134 | 0.137 | 0.139 | 0.142 | 0.145 | 0.148 | 0.151 |
| Ghana                       | 0.225 | 0.229 | 0.231 | 0.234 | 0.237 | 0.239 | 0.239 | 0.241 | 0.243 | 0.246 | 0.249 | 0.252 | 0.255 | 0.26  | 0.264 | 0.268 | 0.271 | 0.272 | 0.274 | 0.277 |
| Guinea                      | 0.066 | 0.068 | 0.069 | 0.07  | 0.073 | 0.075 | 0.078 | 0.081 | 0.084 | 0.087 | 0.091 | 0.094 | 0.098 | 0.101 | 0.104 | 0.107 | 0.11  | 0.113 | 0.116 | 0.118 |
| Guinea-Bissau               | 0.059 | 0.061 | 0.062 | 0.064 | 0.067 | 0.071 | 0.074 | 0.079 | 0.083 | 0.087 | 0.092 | 0.098 | 0.104 | 0.109 | 0.115 | 0.12  | 0.124 | 0.127 | 0.131 | 0.134 |
| Liberia                     | 0.103 | 0.106 | 0.108 | 0.111 | 0.114 | 0.116 | 0.119 | 0.122 | 0.126 | 0.129 | 0.132 | 0.135 | 0.139 | 0.141 | 0.144 | 0.145 | 0.148 | 0.15  | 0.152 | 0.155 |
| Mali                        | 0.059 | 0.06  | 0.061 | 0.063 | 0.064 | 0.065 | 0.067 | 0.068 | 0.07  | 0.072 | 0.073 | 0.075 | 0.077 | 0.078 | 0.08  | 0.081 | 0.082 | 0.084 | 0.085 | 0.087 |
| Mauritania                  | 0.124 | 0.128 | 0.131 | 0.135 | 0.138 | 0.142 | 0.146 | 0.15  | 0.154 | 0.159 | 0.164 | 0.168 | 0.172 | 0.175 | 0.18  | 0.185 | 0.189 | 0.193 | 0.196 | 0.2   |
| Niger                       | 0.056 | 0.057 | 0.058 | 0.059 | 0.06  | 0.061 | 0.062 | 0.063 | 0.065 | 0.066 | 0.067 | 0.068 | 0.07  | 0.071 | 0.071 | 0.072 | 0.073 | 0.074 | 0.075 | 0.076 |
| Nigeria                     | 0.144 | 0.147 | 0.151 | 0.154 | 0.158 | 0.162 | 0.166 | 0.17  | 0.174 | 0.179 | 0.184 | 0.189 | 0.194 | 0.199 | 0.205 | 0.21  | 0.215 | 0.22  | 0.225 | 0.231 |
| Sao Tome and Principe       | 0.146 | 0.15  | 0.152 | 0.153 | 0.153 | 0.154 | 0.154 | 0.154 | 0.155 | 0.157 | 0.158 | 0.16  | 0.162 | 0.164 | 0.165 | 0.167 | 0.169 | 0.171 | 0.174 | 0.179 |
| Senegal                     | 0.108 | 0.111 | 0.114 | 0.117 | 0.12  | 0.124 | 0.128 | 0.132 | 0.135 | 0.137 | 0.14  | 0.144 | 0.146 | 0.146 | 0.146 | 0.147 | 0.149 | 0.152 | 0.154 | 0.155 |
| Sierra Leone                | 0.093 | 0.096 | 0.098 | 0.1   | 0.102 | 0.105 | 0.107 | 0.11  | 0.112 | 0.115 | 0.118 | 0.121 | 0.124 | 0.127 | 0.13  | 0.133 | 0.136 | 0.139 | 0.142 | 0.145 |
| Togo                        | 0.103 | 0.105 | 0.108 | 0.11  | 0.112 | 0.115 | 0.117 | 0.12  | 0.122 | 0.125 | 0.128 | 0.131 | 0.134 | 0.137 | 0.14  | 0.143 | 0.147 | 0.151 | 0.155 | 0.159 |

**Appendix Table 10. Socio-demographic Index values for all estimated GBD 2017 locations, 1970–1989**

| Location                                         | 1970  | 1971  | 1972  | 1973  | 1974  | 1975  | 1976  | 1977  | 1978  | 1979  | 1980  | 1981  | 1982  | 1983  | 1984  | 1985  | 1986  | 1987  | 1988  | 1989  |
|--------------------------------------------------|-------|-------|-------|-------|-------|-------|-------|-------|-------|-------|-------|-------|-------|-------|-------|-------|-------|-------|-------|-------|
| Global                                           | 0.423 | 0.43  | 0.436 | 0.443 | 0.45  | 0.457 | 0.462 | 0.467 | 0.472 | 0.477 | 0.482 | 0.486 | 0.488 | 0.491 | 0.494 | 0.498 | 0.501 | 0.507 | 0.513 | 0.518 |
| Central Europe, Eastern Europe, and Central Asia | 0.597 | 0.601 | 0.605 | 0.608 | 0.61  | 0.613 | 0.617 | 0.621 | 0.623 | 0.626 | 0.629 | 0.632 | 0.632 | 0.633 | 0.635 | 0.637 | 0.64  | 0.643 | 0.647 | 0.651 |
| Central Asia                                     | 0.486 | 0.49  | 0.494 | 0.499 | 0.503 | 0.508 | 0.514 | 0.519 | 0.525 | 0.529 | 0.532 | 0.536 | 0.538 | 0.541 | 0.543 | 0.545 | 0.548 | 0.552 | 0.556 | 0.56  |
| Armenia                                          | 0.501 | 0.507 | 0.512 | 0.518 | 0.524 | 0.529 | 0.534 | 0.538 | 0.541 | 0.544 | 0.546 | 0.546 | 0.546 | 0.546 | 0.546 | 0.545 | 0.546 | 0.547 | 0.549 | 0.552 |
| Azerbaijan                                       | 0.511 | 0.519 | 0.526 | 0.534 | 0.542 | 0.55  | 0.559 | 0.567 | 0.574 | 0.579 | 0.584 | 0.589 | 0.593 | 0.596 | 0.599 | 0.601 | 0.604 | 0.606 | 0.608 | 0.61  |
| Georgia                                          | 0.578 | 0.584 | 0.589 | 0.595 | 0.6   | 0.603 | 0.607 | 0.612 | 0.616 | 0.617 | 0.618 | 0.62  | 0.623 | 0.627 | 0.629 | 0.63  | 0.633 | 0.639 | 0.645 | 0.65  |
| Kazakhstan                                       | 0.527 | 0.533 | 0.539 | 0.546 | 0.553 | 0.559 | 0.565 | 0.57  | 0.576 | 0.58  | 0.584 | 0.588 | 0.591 | 0.593 | 0.594 | 0.595 | 0.598 | 0.602 | 0.606 | 0.61  |
| Kyrgyzstan                                       | 0.485 | 0.487 | 0.492 | 0.499 | 0.504 | 0.509 | 0.515 | 0.52  | 0.525 | 0.529 | 0.531 | 0.532 | 0.533 | 0.536 | 0.54  | 0.543 | 0.547 | 0.552 | 0.557 | 0.56  |
| Mongolia                                         | 0.417 | 0.423 | 0.429 | 0.435 | 0.44  | 0.446 | 0.451 | 0.456 | 0.461 | 0.466 | 0.472 | 0.479 | 0.486 | 0.492 | 0.498 | 0.503 | 0.509 | 0.516 | 0.523 | 0.529 |
| Tajikistan                                       | 0.327 | 0.328 | 0.326 | 0.322 | 0.324 | 0.34  | 0.36  | 0.375 | 0.384 | 0.393 | 0.403 | 0.412 | 0.419 | 0.425 | 0.43  | 0.436 | 0.444 | 0.455 | 0.464 | 0.469 |
| Turkmenistan                                     | 0.497 | 0.502 | 0.507 | 0.513 | 0.518 | 0.523 | 0.528 | 0.533 | 0.537 | 0.542 | 0.546 | 0.55  | 0.554 | 0.558 | 0.562 | 0.565 | 0.569 | 0.574 | 0.579 | 0.584 |
| Uzbekistan                                       | 0.388 | 0.393 | 0.396 | 0.401 | 0.405 | 0.41  | 0.416 | 0.422 | 0.428 | 0.433 | 0.437 | 0.442 | 0.446 | 0.45  | 0.454 | 0.458 | 0.463 | 0.467 | 0.472 | 0.477 |
| Central Europe                                   | 0.59  | 0.595 | 0.598 | 0.598 | 0.598 | 0.601 | 0.605 | 0.609 | 0.613 | 0.617 | 0.622 | 0.626 | 0.629 | 0.631 | 0.633 | 0.637 | 0.641 | 0.646 | 0.651 | 0.658 |
| Albania                                          | 0.433 | 0.441 | 0.451 | 0.46  | 0.469 | 0.478 | 0.486 | 0.495 | 0.503 | 0.511 | 0.519 | 0.526 | 0.532 | 0.535 | 0.537 | 0.541 | 0.546 | 0.549 | 0.549 | 0.549 |
| Bosnia and Herzegovina                           | 0.386 | 0.393 | 0.4   | 0.406 | 0.413 | 0.419 | 0.425 | 0.432 | 0.438 | 0.445 | 0.452 | 0.458 | 0.465 | 0.47  | 0.475 | 0.48  | 0.484 | 0.489 | 0.492 | 0.495 |
| Bulgaria                                         | 0.565 | 0.571 | 0.572 | 0.567 | 0.568 | 0.572 | 0.575 | 0.579 | 0.583 | 0.589 | 0.596 | 0.601 | 0.605 | 0.61  | 0.617 | 0.621 | 0.624 | 0.628 | 0.635 | 0.646 |
| Croatia                                          | 0.628 | 0.633 | 0.637 | 0.64  | 0.644 | 0.647 | 0.651 | 0.656 | 0.661 | 0.667 | 0.672 | 0.678 | 0.683 | 0.688 | 0.692 | 0.697 | 0.702 | 0.707 | 0.713 | 0.719 |
| Czech Republic                                   | 0.664 | 0.664 | 0.657 | 0.648 | 0.644 | 0.646 | 0.65  | 0.652 | 0.656 | 0.666 | 0.677 | 0.681 | 0.683 | 0.686 | 0.688 | 0.692 | 0.697 | 0.701 | 0.704 | 0.708 |
| Hungary                                          | 0.586 | 0.591 | 0.593 | 0.587 | 0.58  | 0.583 | 0.59  | 0.598 | 0.605 | 0.615 | 0.624 | 0.633 | 0.642 | 0.648 | 0.65  | 0.653 | 0.658 | 0.664 | 0.67  | 0.675 |
| Macedonia                                        | 0.552 | 0.557 | 0.561 | 0.564 | 0.567 | 0.57  | 0.574 | 0.576 | 0.579 | 0.583 | 0.588 | 0.594 | 0.598 | 0.601 | 0.605 | 0.61  | 0.614 | 0.617 | 0.62  | 0.623 |
| Montenegro                                       | 0.647 | 0.652 | 0.656 | 0.661 | 0.665 | 0.669 | 0.674 | 0.677 | 0.681 | 0.685 | 0.687 | 0.689 | 0.691 | 0.692 | 0.694 | 0.696 | 0.698 | 0.699 | 0.701 | 0.704 |
| Poland                                           | 0.612 | 0.615 | 0.619 | 0.621 | 0.623 | 0.623 | 0.626 | 0.631 | 0.633 | 0.633 | 0.636 | 0.635 | 0.63  | 0.63  | 0.633 | 0.639 | 0.645 | 0.649 | 0.654 | 0.659 |
| Romania                                          | 0.532 | 0.542 | 0.55  | 0.549 | 0.548 | 0.555 | 0.559 | 0.564 | 0.569 | 0.573 | 0.58  | 0.589 | 0.601 | 0.604 | 0.604 | 0.604 | 0.606 | 0.611 | 0.62  | 0.626 |
| Serbia                                           | 0.571 | 0.574 | 0.577 | 0.58  | 0.582 | 0.584 | 0.587 | 0.591 | 0.593 | 0.595 | 0.601 | 0.604 | 0.604 | 0.605 | 0.608 | 0.612 | 0.615 | 0.617 | 0.622 | 0.627 |
| Slovakia                                         | 0.628 | 0.631 | 0.63  | 0.628 | 0.63  | 0.633 | 0.636 | 0.638 | 0.64  | 0.645 | 0.652 | 0.655 | 0.657 | 0.658 | 0.659 | 0.663 | 0.669 | 0.674 | 0.679 | 0.681 |
| Slovenia                                         | 0.651 | 0.654 | 0.657 | 0.661 | 0.664 | 0.665 | 0.668 | 0.671 | 0.675 | 0.68  | 0.685 | 0.691 | 0.697 | 0.704 | 0.71  | 0.714 | 0.718 | 0.724 | 0.73  | 0.736 |
| Eastern Europe                                   | 0.619 | 0.622 | 0.628 | 0.633 | 0.637 | 0.641 | 0.644 | 0.648 | 0.65  | 0.653 | 0.655 | 0.658 | 0.657 | 0.658 | 0.66  | 0.662 | 0.664 | 0.666 | 0.671 | 0.674 |
| Belarus                                          | 0.559 | 0.561 | 0.565 | 0.569 | 0.573 | 0.576 | 0.58  | 0.583 | 0.585 | 0.588 | 0.59  | 0.592 | 0.593 | 0.595 | 0.597 | 0.601 | 0.605 | 0.609 | 0.615 | 0.62  |
| Estonia                                          | 0.668 | 0.671 | 0.676 | 0.682 | 0.684 | 0.684 | 0.684 | 0.686 | 0.69  | 0.692 | 0.69  | 0.689 | 0.69  | 0.694 | 0.696 | 0.695 | 0.692 | 0.692 | 0.699 | 0.705 |
| Latvia                                           | 0.651 | 0.655 | 0.659 | 0.664 | 0.668 | 0.669 | 0.672 | 0.675 | 0.678 | 0.68  | 0.681 | 0.681 | 0.68  | 0.681 | 0.683 | 0.683 | 0.683 | 0.685 | 0.689 | 0.693 |
| Lithuania                                        | 0.66  | 0.664 | 0.67  | 0.677 | 0.681 | 0.684 | 0.686 | 0.689 | 0.692 | 0.695 | 0.701 | 0.705 | 0.707 | 0.708 | 0.709 | 0.711 | 0.712 | 0.712 | 0.71  | 0.709 |
| Moldova                                          | 0.524 | 0.528 | 0.531 | 0.536 | 0.54  | 0.545 | 0.549 | 0.552 | 0.554 | 0.556 | 0.558 | 0.558 | 0.558 | 0.559 | 0.56  | 0.562 | 0.564 | 0.566 | 0.569 | 0.571 |
| Russian Federation                               | 0.628 | 0.632 | 0.639 | 0.644 | 0.648 | 0.651 | 0.655 | 0.658 | 0.66  | 0.663 | 0.666 | 0.668 | 0.666 | 0.666 | 0.668 | 0.669 | 0.671 | 0.673 | 0.677 | 0.679 |
| Ukraine                                          | 0.593 | 0.596 | 0.599 | 0.604 | 0.609 | 0.613 | 0.617 | 0.62  | 0.624 | 0.627 | 0.63  | 0.632 | 0.633 | 0.636 | 0.639 | 0.643 | 0.646 | 0.65  | 0.655 | 0.659 |
| High-income                                      | 0.666 | 0.673 | 0.681 | 0.688 | 0.694 | 0.7   | 0.705 | 0.71  | 0.715 | 0.718 | 0.723 | 0.728 | 0.734 | 0.74  | 0.744 | 0.749 | 0.754 | 0.758 | 0.762 | 0.765 |
| Australasia                                      | 0.66  | 0.664 | 0.677 | 0.687 | 0.697 | 0.707 | 0.716 | 0.724 | 0.731 | 0.736 | 0.739 | 0.743 | 0.747 | 0.752 | 0.758 | 0.762 | 0.767 | 0.772 | 0.776 | 0.779 |
| Australia                                        | 0.664 | 0.667 | 0.68  | 0.69  | 0.699 | 0.709 | 0.718 | 0.725 | 0.732 | 0.737 | 0.741 | 0.744 | 0.748 | 0.754 | 0.759 | 0.764 | 0.77  | 0.775 | 0.779 | 0.783 |
| New Zealand                                      | 0.645 | 0.651 | 0.662 | 0.675 | 0.687 | 0.697 | 0.706 | 0.716 | 0.723 | 0.728 | 0.733 | 0.738 | 0.743 | 0.747 | 0.751 | 0.754 | 0.756 | 0.757 | 0.759 | 0.762 |
| High-income Asia-Pacific                         | 0.663 | 0.667 | 0.672 | 0.68  | 0.688 | 0.695 | 0.702 | 0.708 | 0.713 | 0.718 | 0.722 | 0.726 | 0.732 | 0.738 | 0.745 | 0.752 | 0.758 | 0.764 | 0.771 | 0.777 |
| Brunei                                           | 0.57  | 0.584 | 0.601 | 0.619 | 0.639 | 0.654 | 0.657 | 0.654 | 0.653 | 0.656 | 0.66  | 0.668 | 0.677 | 0.685 | 0.691 | 0.697 | 0.704 | 0.712 | 0.718 | 0.724 |
| Japan                                            | 0.696 | 0.697 | 0.701 | 0.707 | 0.714 | 0.722 | 0.73  | 0.737 | 0.743 | 0.749 | 0.754 | 0.759 | 0.762 | 0.766 | 0.771 | 0.777 | 0.781 | 0.787 | 0.792 | 0.798 |
| Aichi                                            | 0.698 | 0.698 | 0.701 | 0.706 | 0.715 | 0.724 | 0.733 | 0.74  | 0.747 | 0.754 | 0.76  | 0.764 | 0.768 | 0.771 | 0.777 | 0.782 | 0.787 | 0.793 | 0.8   | 0.806 |
| Akita                                            | 0.658 | 0.658 | 0.66  | 0.665 | 0.671 | 0.679 | 0.686 | 0.693 | 0.7   | 0.707 | 0.714 | 0.719 | 0.723 | 0.728 | 0.734 | 0.74  | 0.745 | 0.75  | 0.756 | 0.762 |
| Aomori                                           | 0.65  | 0.65  | 0.652 | 0.657 | 0.664 | 0.673 | 0.68  | 0.688 | 0.695 | 0.702 | 0.708 | 0.713 | 0.716 | 0.721 | 0.727 | 0.733 | 0.738 | 0.744 | 0.75  | 0.756 |
| Chiba                                            | 0.691 | 0.692 | 0.696 | 0.701 | 0.709 | 0.718 | 0.726 | 0.734 | 0.741 | 0.747 | 0.753 | 0.757 | 0.761 | 0.765 | 0.77  | 0.775 | 0.78  | 0.786 | 0.792 | 0.798 |
| Ehime                                            | 0.667 | 0.668 | 0.671 | 0.677 | 0.685 | 0.693 | 0.701 | 0.708 | 0.714 | 0.721 | 0.727 | 0.731 | 0.735 | 0.739 | 0.744 | 0.749 | 0.754 | 0.759 | 0.765 | 0.771 |
| Fukui                                            | 0.667 | 0.667 | 0.669 | 0.674 | 0.682 | 0.691 | 0.698 | 0.706 | 0.713 | 0.72  | 0.727 | 0.732 | 0.737 | 0.741 | 0.748 | 0.754 | 0.759 | 0.765 | 0.772 | 0.779 |
| Fukuoka                                          | 0.692 | 0.695 | 0.699 | 0.705 | 0.713 | 0.72  | 0.727 | 0.734 | 0.739 | 0.745 | 0.75  | 0.754 | 0.757 | 0.761 | 0.766 | 0.771 | 0.775 | 0.781 | 0.787 | 0.792 |
| Fukushima                                        | 0.663 | 0.663 | 0.665 | 0.671 | 0.678 | 0.686 | 0.694 | 0.701 | 0.707 | 0.713 | 0.719 | 0.723 | 0.727 | 0.73  | 0.736 | 0.741 | 0.746 | 0.752 | 0.759 | 0.765 |
| Gifu                                             | 0.672 | 0.673 | 0.676 | 0.681 | 0.689 | 0.697 | 0.705 | 0.712 | 0.719 | 0.725 | 0.732 | 0.737 | 0.741 | 0.745 | 0.751 | 0.757 | 0.762 | 0.768 | 0.774 | 0.78  |
| Gunma                                            | 0.683 | 0.685 | 0.689 | 0.695 | 0.702 | 0.71  | 0.717 | 0.724 | 0.729 | 0.735 | 0.74  | 0.745 | 0.748 | 0.751 | 0.756 | 0.761 | 0.766 | 0.771 | 0.776 | 0.782 |
| Hiroshima                                        | 0.688 | 0.688 | 0.691 | 0.697 | 0.705 | 0.715 | 0.723 | 0.731 | 0.738 | 0.744 | 0.75  | 0.755 | 0.758 | 0.762 | 0.768 | 0.773 | 0.778 | 0.783 | 0.789 | 0.795 |
| Hokkaidō                                         | 0.676 | 0.677 | 0.68  | 0.686 | 0.693 | 0.702 | 0.71  | 0.718 | 0.725 | 0.731 | 0.737 | 0.742 | 0.745 | 0.749 | 0.754 | 0.758 | 0.763 | 0.768 | 0.773 | 0.779 |
| Hyōgo                                            | 0.689 | 0.691 | 0.694 | 0.7   | 0.708 | 0.717 | 0.725 | 0.732 | 0.739 | 0.745 | 0.75  | 0.755 | 0.758 | 0.762 | 0.767 | 0.772 | 0.776 | 0.782 | 0.787 | 0.793 |
| Ibaraki                                          | 0.679 | 0.68  | 0.683 | 0.689 | 0.697 | 0.706 | 0.713 | 0.72  | 0.726 | 0.732 | 0.738 | 0.742 | 0.745 | 0.749 | 0.755 | 0.76  | 0.765 | 0.771 | 0.777 | 0.783 |
| Ishikawa                                         | 0.669 | 0.668 | 0.67  | 0.675 | 0.682 | 0.691 | 0.7   | 0.707 | 0.715 | 0.722 | 0.729 | 0.734 | 0.739 | 0.744 | 0.751 | 0.757 | 0.763 | 0.77  | 0.777 | 0.783 |
| Iwate                                            | 0.65  | 0.65  | 0.652 | 0.657 | 0.665 | 0.674 | 0.681 | 0.688 | 0.695 | 0.701 | 0.707 | 0.712 | 0.716 | 0.721 | 0.727 | 0.733 | 0.738 | 0.744 | 0.749 | 0.755 |
| Kagawa                                           | 0.675 | 0.676 | 0.678 | 0.684 | 0.692 | 0.701 | 0     |       |       |       |       |       |       |       |       |       |       |       |       |       |

**Appendix Table 10. Socio-demographic Index values for all estimated GBD 2017 locations, 1970–1989**

| Location                  | 1970  | 1971  | 1972  | 1973  | 1974  | 1975  | 1976  | 1977    | 1978  | 1979  | 1980  | 1981  | 1982  | 1983  | 1984  | 1985  | 1986  | 1987  | 1988  | 1989  |
|---------------------------|-------|-------|-------|-------|-------|-------|-------|---------|-------|-------|-------|-------|-------|-------|-------|-------|-------|-------|-------|-------|
| Öta                       | 0.679 | 0.681 | 0.684 | 0.689 | 0.696 | 0.704 | 0.711 | 0.717   | 0.723 | 0.729 | 0.735 | 0.74  | 0.744 | 0.748 | 0.754 | 0.759 | 0.764 | 0.769 | 0.774 | 0.78  |
| Okayama                   | 0.677 | 0.677 | 0.68  | 0.685 | 0.694 | 0.703 | 0.711 | 0.719   | 0.726 | 0.732 | 0.737 | 0.742 | 0.745 | 0.749 | 0.755 | 0.761 | 0.766 | 0.772 | 0.778 | 0.784 |
| Okinawa                   | 0.643 | 0.643 | 0.644 | 0.649 | 0.657 | 0.665 | 0.673 | 0.68    | 0.686 | 0.692 | 0.698 | 0.703 | 0.707 | 0.711 | 0.717 | 0.723 | 0.729 | 0.735 | 0.742 | 0.748 |
| Osaka                     | 0.709 | 0.711 | 0.714 | 0.72  | 0.728 | 0.737 | 0.745 | 0.752   | 0.759 | 0.765 | 0.77  | 0.774 | 0.777 | 0.781 | 0.785 | 0.789 | 0.794 | 0.799 | 0.804 | 0.81  |
| Saga                      | 0.668 | 0.67  | 0.674 | 0.68  | 0.687 | 0.695 | 0.701 | 0.707   | 0.713 | 0.719 | 0.724 | 0.729 | 0.732 | 0.736 | 0.742 | 0.747 | 0.751 | 0.757 | 0.762 | 0.768 |
| Saitama                   | 0.683 | 0.685 | 0.688 | 0.694 | 0.702 | 0.711 | 0.719 | 0.726   | 0.733 | 0.74  | 0.746 | 0.75  | 0.754 | 0.757 | 0.763 | 0.767 | 0.772 | 0.777 | 0.783 | 0.788 |
| Shiga                     | 0.694 | 0.695 | 0.698 | 0.704 | 0.712 | 0.72  | 0.727 | 0.734   | 0.74  | 0.747 | 0.753 | 0.758 | 0.761 | 0.765 | 0.77  | 0.775 | 0.78  | 0.786 | 0.792 | 0.798 |
| Shimane                   | 0.658 | 0.659 | 0.662 | 0.668 | 0.676 | 0.684 | 0.69  | 0.697   | 0.702 | 0.708 | 0.713 | 0.718 | 0.722 | 0.725 | 0.731 | 0.736 | 0.74  | 0.746 | 0.751 | 0.757 |
| Shizuoka                  | 0.687 | 0.687 | 0.69  | 0.696 | 0.704 | 0.713 | 0.721 | 0.729   | 0.735 | 0.742 | 0.747 | 0.752 | 0.755 | 0.759 | 0.764 | 0.77  | 0.774 | 0.78  | 0.786 | 0.792 |
| Tochigi                   | 0.682 | 0.683 | 0.686 | 0.692 | 0.699 | 0.707 | 0.714 | 0.721   | 0.727 | 0.733 | 0.738 | 0.743 | 0.746 | 0.749 | 0.754 | 0.759 | 0.764 | 0.77  | 0.776 | 0.782 |
| Tokushima                 | 0.668 | 0.669 | 0.672 | 0.678 | 0.685 | 0.694 | 0.701 | 0.707   | 0.713 | 0.719 | 0.725 | 0.729 | 0.732 | 0.736 | 0.742 | 0.748 | 0.753 | 0.758 | 0.765 | 0.771 |
| Tōkyō                     | 0.774 | 0.777 | 0.782 | 0.788 | 0.795 | 0.803 | 0.809 | 0.815   | 0.821 | 0.826 | 0.83  | 0.834 | 0.837 | 0.84  | 0.844 | 0.848 | 0.85  | 0.856 | 0.861 | 0.866 |
| Tottori                   | 0.664 | 0.665 | 0.668 | 0.674 | 0.682 | 0.69  | 0.697 | 0.704   | 0.71  | 0.715 | 0.721 | 0.726 | 0.729 | 0.733 | 0.739 | 0.744 | 0.749 | 0.754 | 0.76  | 0.766 |
| Toyama                    | 0.674 | 0.673 | 0.675 | 0.68  | 0.687 | 0.696 | 0.704 | 0.712   | 0.719 | 0.726 | 0.733 | 0.738 | 0.743 | 0.747 | 0.753 | 0.759 | 0.765 | 0.771 | 0.778 | 0.785 |
| Wakayama                  | 0.665 | 0.667 | 0.67  | 0.676 | 0.685 | 0.694 | 0.702 | 0.709   | 0.714 | 0.718 | 0.721 | 0.723 | 0.726 | 0.73  | 0.738 | 0.744 | 0.75  | 0.757 | 0.763 | 0.77  |
| Yamagata                  | 0.66  | 0.661 | 0.663 | 0.669 | 0.675 | 0.683 | 0.689 | 0.696   | 0.702 | 0.709 | 0.715 | 0.72  | 0.725 | 0.729 | 0.734 | 0.74  | 0.744 | 0.75  | 0.756 | 0.761 |
| Yamaguchi                 | 0.684 | 0.685 | 0.688 | 0.694 | 0.702 | 0.71  | 0.717 | 0.724   | 0.73  | 0.736 | 0.742 | 0.746 | 0.75  | 0.753 | 0.759 | 0.764 | 0.768 | 0.774 | 0.78  | 0.786 |
| Yamanashi                 | 0.691 | 0.694 | 0.699 | 0.705 | 0.712 | 0.72  | 0.726 | 0.732   | 0.737 | 0.743 | 0.748 | 0.753 | 0.756 | 0.76  | 0.764 | 0.769 | 0.772 | 0.777 | 0.782 | 0.787 |
| South Korea               | 0.494 | 0.508 | 0.523 | 0.542 | 0.557 | 0.568 | 0.578 | 0.587   | 0.595 | 0.601 | 0.605 | 0.611 | 0.623 | 0.636 | 0.647 | 0.659 | 0.671 | 0.682 | 0.692 | 0.702 |
| Singapore                 | 0.568 | 0.576 | 0.586 | 0.598 | 0.612 | 0.621 | 0.63  | 0.641   | 0.647 | 0.654 | 0.662 | 0.669 | 0.678 | 0.687 | 0.694 | 0.702 | 0.71  | 0.715 | 0.722 | 0.729 |
| High-income North America | 0.702 | 0.719 | 0.733 | 0.74  | 0.745 | 0.751 | 0.755 | 0.758   | 0.762 | 0.762 | 0.765 | 0.769 | 0.773 | 0.777 | 0.779 | 0.782 | 0.786 | 0.787 | 0.786 | 0.784 |
| Canada                    | 0.702 | 0.712 | 0.721 | 0.728 | 0.732 | 0.736 | 0.742 | 0.749   | 0.755 | 0.759 | 0.764 | 0.769 | 0.772 | 0.777 | 0.782 | 0.787 | 0.792 | 0.796 | 0.798 | 0.8   |
| Greenland                 | 0.57  | 0.592 | 0.609 | 0.622 | 0.631 | 0.636 | 0.642 | 0.648   | 0.653 | 0.657 | 0.662 | 0.666 | 0.671 | 0.674 | 0.675 | 0.676 | 0.676 | 0.675 | 0.673 | 0.673 |
| USA                       | 0.702 | 0.719 | 0.734 | 0.741 | 0.746 | 0.752 | 0.756 | 0.759   | 0.762 | 0.762 | 0.765 | 0.769 | 0.772 | 0.777 | 0.779 | 0.781 | 0.785 | 0.786 | 0.784 | 0.782 |
| Alabama                   | 0.643 | 0.659 | 0.675 | 0.684 | 0.69  | 0.699 | 0.705 | 0.71    | 0.716 | 0.718 | 0.723 | 0.729 | 0.733 | 0.739 | 0.742 | 0.745 | 0.749 | 0.75  | 0.748 | 0.745 |
| Alaska                    | 0.687 | 0.706 | 0.722 | 0.728 | 0.734 | 0.745 | 0.752 | 0.757   | 0.761 | 0.758 | 0.76  | 0.762 | 0.764 | 0.768 | 0.767 | 0.768 | 0.772 | 0.771 | 0.767 | 0.759 |
| Arizona                   | 0.679 | 0.694 | 0.708 | 0.715 | 0.723 | 0.734 | 0.741 | 0.746   | 0.75  | 0.748 | 0.75  | 0.751 | 0.752 | 0.755 | 0.754 | 0.755 | 0.759 | 0.759 | 0.757 | 0.753 |
| Arkansas                  | 0.631 | 0.646 | 0.659 | 0.667 | 0.673 | 0.683 | 0.689 | 0.695   | 0.701 | 0.702 | 0.706 | 0.711 | 0.716 | 0.721 | 0.723 | 0.726 | 0.729 | 0.729 | 0.727 | 0.723 |
| California                | 0.733 | 0.752 | 0.765 | 0.769 | 0.77  | 0.773 | 0.775 | 0.777   | 0.779 | 0.777 | 0.779 | 0.781 | 0.782 | 0.786 | 0.786 | 0.786 | 0.788 | 0.786 | 0.782 | 0.775 |
| Colorado                  | 0.721 | 0.738 | 0.752 | 0.761 | 0.768 | 0.775 | 0.78  | 0.783   | 0.785 | 0.784 | 0.786 | 0.789 | 0.791 | 0.794 | 0.795 | 0.797 | 0.8   | 0.801 | 0.801 | 0.799 |
| Connecticut               | 0.751 | 0.768 | 0.782 | 0.789 | 0.794 | 0.8   | 0.803 | 0.805   | 0.808 | 0.809 | 0.812 | 0.816 | 0.819 | 0.824 | 0.827 | 0.83  | 0.835 | 0.837 | 0.839 | 0.84  |
| Delaware                  | 0.722 | 0.738 | 0.752 | 0.76  | 0.765 | 0.772 | 0.775 | 0.778   | 0.78  | 0.779 | 0.782 | 0.785 | 0.787 | 0.791 | 0.793 | 0.795 | 0.799 | 0.8   | 0.8   | 0.8   |
| Washington, DC            | 0.736 | 0.749 | 0.761 | 0.768 | 0.774 | 0.783 | 0.788 | 0.792   | 0.796 | 0.795 | 0.797 | 0.799 | 0.8   | 0.802 | 0.801 | 0.802 | 0.804 | 0.803 | 0.801 | 0.797 |
| Florida                   | 0.684 | 0.701 | 0.717 | 0.727 | 0.736 | 0.748 | 0.755 | 0.76    | 0.764 | 0.763 | 0.765 | 0.768 | 0.77  | 0.773 | 0.773 | 0.775 | 0.778 | 0.778 | 0.777 | 0.774 |
| Georgia                   | 0.651 | 0.668 | 0.685 | 0.696 | 0.704 | 0.714 | 0.72  | 0.726   | 0.73  | 0.731 | 0.734 | 0.738 | 0.742 | 0.747 | 0.75  | 0.753 | 0.757 | 0.758 | 0.757 | 0.755 |
| Hawaii                    | 0.717 | 0.731 | 0.744 | 0.75  | 0.756 | 0.764 | 0.768 | 0.772   | 0.775 | 0.774 | 0.776 | 0.778 | 0.779 | 0.782 | 0.782 | 0.783 | 0.787 | 0.787 | 0.786 | 0.782 |
| Idaho                     | 0.671 | 0.687 | 0.7   | 0.705 | 0.709 | 0.715 | 0.717 | 0.719   | 0.724 | 0.725 | 0.731 | 0.738 | 0.743 | 0.751 | 0.753 | 0.756 | 0.76  | 0.761 | 0.76  | 0.757 |
| Illinois                  | 0.711 | 0.728 | 0.742 | 0.75  | 0.755 | 0.761 | 0.764 | 0.767   | 0.77  | 0.769 | 0.772 | 0.776 | 0.779 | 0.784 | 0.787 | 0.789 | 0.793 | 0.793 | 0.791 | 0.788 |
| Indiana                   | 0.687 | 0.704 | 0.719 | 0.726 | 0.731 | 0.738 | 0.742 | 0.745   | 0.749 | 0.749 | 0.753 | 0.758 | 0.762 | 0.767 | 0.769 | 0.771 | 0.775 | 0.775 | 0.774 | 0.772 |
| Iowa                      | 0.706 | 0.724 | 0.738 | 0.746 | 0.75  | 0.755 | 0.756 | 0.758   | 0.762 | 0.763 | 0.767 | 0.772 | 0.777 | 0.783 | 0.785 | 0.789 | 0.793 | 0.794 | 0.794 | 0.793 |
| Kansas                    | 0.707 | 0.724 | 0.738 | 0.744 | 0.748 | 0.753 | 0.754 | 0.755   | 0.757 | 0.756 | 0.759 | 0.763 | 0.767 | 0.772 | 0.774 | 0.777 | 0.782 | 0.784 | 0.784 | 0.782 |
| Kentucky                  | 0.647 | 0.664 | 0.679 | 0.687 | 0.692 | 0.699 | 0.703 | 0.707   | 0.712 | 0.714 | 0.72  | 0.726 | 0.731 | 0.737 | 0.74  | 0.744 | 0.747 | 0.748 | 0.747 | 0.744 |
| Louisiana                 | 0.642 | 0.662 | 0.678 | 0.687 | 0.692 | 0.698 | 0.702 | 0.705   | 0.708 | 0.708 | 0.713 | 0.719 | 0.724 | 0.73  | 0.733 | 0.736 | 0.741 | 0.741 | 0.74  | 0.736 |
| Maine                     | 0.68  | 0.697 | 0.712 | 0.72  | 0.726 | 0.734 | 0.739 | 0.743   | 0.748 | 0.749 | 0.754 | 0.758 | 0.763 | 0.768 | 0.77  | 0.774 | 0.779 | 0.782 | 0.784 | 0.786 |
| Maryland                  | 0.727 | 0.746 | 0.762 | 0.771 | 0.778 | 0.785 | 0.788 | 0.791   | 0.794 | 0.794 | 0.796 | 0.798 | 0.8   | 0.804 | 0.806 | 0.808 | 0.812 | 0.813 | 0.813 | 0.812 |
| Massachusetts             | 0.75  | 0.766 | 0.779 | 0.787 | 0.792 | 0.798 | 0.801 | 0.804   | 0.808 | 0.809 | 0.812 | 0.815 | 0.818 | 0.823 | 0.826 | 0.83  | 0.834 | 0.838 | 0.84  | 0.841 |
| Michigan                  | 0.701 | 0.719 | 0.735 | 0.743 | 0.749 | 0.756 | 0.76  | 0.763   | 0.766 | 0.766 | 0.77  | 0.773 | 0.777 | 0.782 | 0.784 | 0.787 | 0.791 | 0.792 | 0.79  | 0.788 |
| Minnesota                 | 0.728 | 0.744 | 0.756 | 0.761 | 0.765 | 0.769 | 0.77  | 0.772   | 0.776 | 0.777 | 0.781 | 0.786 | 0.791 | 0.797 | 0.801 | 0.806 | 0.811 | 0.814 | 0.816 | 0.816 |
| Mississippi               | 0.607 | 0.625 | 0.642 | 0.653 | 0.661 | 0.672 | 0.679 | 0.685   | 0.691 | 0.692 | 0.698 | 0.704 | 0.709 | 0.716 | 0.718 | 0.721 | 0.725 | 0.725 | 0.723 | 0.719 |
| Missouri                  | 0.69  | 0.706 | 0.72  | 0.727 | 0.732 | 0.739 | 0.742 | 0.744   | 0.747 | 0.746 | 0.749 | 0.753 | 0.757 | 0.763 | 0.765 | 0.768 | 0.773 | 0.774 | 0.773 | 0.77  |
| Montana                   | 0.693 | 0.708 | 0.721 | 0.728 | 0.733 | 0.742 | 0.745 | 0.749   | 0.754 | 0.755 | 0.759 | 0.763 | 0.767 | 0.772 | 0.773 | 0.775 | 0.778 | 0.779 | 0.778 | 0.775 |
| Nebraska                  | 0.708 | 0.724 | 0.737 | 0.744 | 0.749 | 0.756 | 0.759 | 0.762   | 0.766 | 0.766 | 0.769 | 0.774 | 0.778 | 0.783 | 0.785 | 0.788 | 0.793 | 0.794 | 0.795 | 0.794 |
| Nevada                    | 0.708 | 0.726 | 0.742 | 0.75  | 0.756 | 0.765 | 0.769 | 0.772   | 0.774 | 0.772 | 0.773 | 0.774 | 0.775 | 0.778 | 0.777 | 0.776 | 0.778 | 0.775 | 0.771 | 0.764 |
| New Hampshire             | 0.711 | 0.728 | 0.743 | 0.751 | 0.759 | 0.767 | 0.772 | 0.777   | 0.782 | 0.784 | 0.788 | 0.792 | 0.796 | 0.801 | 0.804 | 0.808 | 0.814 | 0.818 | 0.822 | 0.824 |
| New Jersey                | 0.732 | 0.749 | 0.763 | 0.772 | 0.778 | 0.784 | 0.788 | 0.791   | 0.795 | 0.796 | 0.799 | 0.803 | 0.807 | 0.812 | 0.816 | 0.819 | 0.823 | 0.825 | 0.826 | 0.827 |
| New Mexico                | 0.663 | 0.68  | 0.694 | 0.7   | 0.706 | 0.715 | 0.719 | 0.722   | 0.725 | 0.723 | 0.725 | 0.729 | 0.732 | 0.737 | 0.738 | 0.74  | 0.744 | 0.744 | 0.741 | 0.735 |
| New York                  | 0.735 | 0.753 | 0.767 | 0.773 | 0.776 | 0.781 | 0.784 | 0.787   | 0.792 | 0.793 | 0.796 | 0.8   | 0.802 | 0.806 | 0.808 | 0.811 | 0.814 | 0.815 | 0.816 | 0.815 |
| North Carolina            | 0.662 | 0.678 | 0.693 | 0.703 | 0.711 | 0.72  | 0.727 | 0.733</ |       |       |       |       |       |       |       |       |       |       |       |       |

**Appendix Table 10. Socio-demographic Index values for all estimated GBD 2017 locations, 1970–1989**

| Location                | 1970  | 1971  | 1972  | 1973  | 1974  | 1975  | 1976  | 1977  | 1978  | 1979  | 1980  | 1981  | 1982  | 1983  | 1984  | 1985  | 1986  | 1987  | 1988  | 1989  |
|-------------------------|-------|-------|-------|-------|-------|-------|-------|-------|-------|-------|-------|-------|-------|-------|-------|-------|-------|-------|-------|-------|
| Washington              | 0.732 | 0.752 | 0.767 | 0.773 | 0.776 | 0.78  | 0.781 | 0.782 | 0.784 | 0.782 | 0.785 | 0.788 | 0.79  | 0.794 | 0.795 | 0.797 | 0.8   | 0.801 | 0.8   | 0.797 |
| West Virginia           | 0.654 | 0.669 | 0.684 | 0.692 | 0.697 | 0.704 | 0.708 | 0.712 | 0.717 | 0.719 | 0.724 | 0.73  | 0.736 | 0.742 | 0.744 | 0.747 | 0.751 | 0.752 | 0.751 | 0.748 |
| Wisconsin               | 0.715 | 0.732 | 0.745 | 0.752 | 0.755 | 0.761 | 0.764 | 0.767 | 0.77  | 0.77  | 0.773 | 0.777 | 0.781 | 0.785 | 0.788 | 0.791 | 0.796 | 0.799 | 0.8   | 0.8   |
| Wyoming                 | 0.685 | 0.703 | 0.717 | 0.723 | 0.728 | 0.736 | 0.738 | 0.739 | 0.741 | 0.739 | 0.742 | 0.746 | 0.75  | 0.755 | 0.755 | 0.758 | 0.765 | 0.767 | 0.767 | 0.765 |
| Southern Latin America  | 0.522 | 0.527 | 0.529 | 0.531 | 0.534 | 0.537 | 0.54  | 0.542 | 0.545 | 0.549 | 0.554 | 0.56  | 0.566 | 0.572 | 0.576 | 0.577 | 0.579 | 0.583 | 0.586 | 0.591 |
| Argentina               | 0.531 | 0.536 | 0.538 | 0.539 | 0.538 | 0.537 | 0.537 | 0.537 | 0.538 | 0.543 | 0.55  | 0.557 | 0.563 | 0.569 | 0.572 | 0.572 | 0.575 | 0.579 | 0.584 | 0.589 |
| Chile                   | 0.501 | 0.506 | 0.509 | 0.517 | 0.527 | 0.536 | 0.544 | 0.55  | 0.554 | 0.557 | 0.558 | 0.562 | 0.569 | 0.575 | 0.579 | 0.583 | 0.586 | 0.587 | 0.589 | 0.593 |
| Uruguay                 | 0.516 | 0.517 | 0.519 | 0.522 | 0.526 | 0.53  | 0.533 | 0.537 | 0.543 | 0.55  | 0.557 | 0.562 | 0.567 | 0.572 | 0.577 | 0.579 | 0.581 | 0.582 | 0.583 | 0.587 |
| Western Europe          | 0.649 | 0.653 | 0.66  | 0.667 | 0.674 | 0.68  | 0.685 | 0.691 | 0.697 | 0.701 | 0.707 | 0.714 | 0.72  | 0.727 | 0.732 | 0.737 | 0.743 | 0.748 | 0.753 | 0.758 |
| Andorra                 | 0.803 | 0.805 | 0.807 | 0.81  | 0.812 | 0.815 | 0.818 | 0.82  | 0.822 | 0.824 | 0.826 | 0.829 | 0.832 | 0.835 | 0.838 | 0.841 | 0.843 | 0.844 | 0.846 | 0.847 |
| Austria                 | 0.674 | 0.68  | 0.688 | 0.697 | 0.704 | 0.712 | 0.72  | 0.726 | 0.73  | 0.732 | 0.733 | 0.736 | 0.741 | 0.748 | 0.754 | 0.759 | 0.763 | 0.767 | 0.771 | 0.774 |
| Belgium                 | 0.693 | 0.7   | 0.708 | 0.717 | 0.725 | 0.731 | 0.737 | 0.741 | 0.746 | 0.75  | 0.755 | 0.761 | 0.767 | 0.773 | 0.779 | 0.784 | 0.789 | 0.792 | 0.796 | 0.8   |
| Cyprus                  | 0.604 | 0.609 | 0.619 | 0.632 | 0.64  | 0.643 | 0.645 | 0.646 | 0.646 | 0.648 | 0.652 | 0.658 | 0.664 | 0.67  | 0.677 | 0.685 | 0.694 | 0.702 | 0.71  | 0.718 |
| Denmark                 | 0.756 | 0.758 | 0.764 | 0.769 | 0.771 | 0.777 | 0.785 | 0.791 | 0.796 | 0.802 | 0.809 | 0.815 | 0.821 | 0.825 | 0.828 | 0.832 | 0.836 | 0.839 | 0.841 | 0.843 |
| Finland                 | 0.715 | 0.723 | 0.731 | 0.736 | 0.739 | 0.743 | 0.748 | 0.754 | 0.759 | 0.765 | 0.769 | 0.772 | 0.776 | 0.782 | 0.789 | 0.795 | 0.799 | 0.803 | 0.807 | 0.811 |
| France                  | 0.62  | 0.626 | 0.63  | 0.64  | 0.657 | 0.667 | 0.673 | 0.679 | 0.686 | 0.692 | 0.698 | 0.705 | 0.713 | 0.721 | 0.728 | 0.735 | 0.742 | 0.75  | 0.756 | 0.763 |
| Germany                 | 0.693 | 0.699 | 0.71  | 0.717 | 0.722 | 0.727 | 0.73  | 0.735 | 0.741 | 0.744 | 0.747 | 0.752 | 0.757 | 0.763 | 0.768 | 0.768 | 0.771 | 0.777 | 0.78  | 0.781 |
| Greece                  | 0.596 | 0.602 | 0.607 | 0.61  | 0.611 | 0.614 | 0.617 | 0.62  | 0.623 | 0.627 | 0.634 | 0.643 | 0.651 | 0.66  | 0.67  | 0.68  | 0.689 | 0.696 | 0.703 | 0.711 |
| Iceland                 | 0.682 | 0.684 | 0.69  | 0.7   | 0.711 | 0.72  | 0.729 | 0.736 | 0.741 | 0.747 | 0.754 | 0.762 | 0.771 | 0.78  | 0.788 | 0.794 | 0.798 | 0.802 | 0.805 | 0.809 |
| Ireland                 | 0.641 | 0.642 | 0.645 | 0.65  | 0.656 | 0.663 | 0.669 | 0.675 | 0.68  | 0.684 | 0.69  | 0.698 | 0.706 | 0.713 | 0.721 | 0.727 | 0.733 | 0.74  | 0.746 | 0.751 |
| Israel                  | 0.626 | 0.631 | 0.637 | 0.64  | 0.641 | 0.642 | 0.648 | 0.657 | 0.664 | 0.67  | 0.676 | 0.679 | 0.682 | 0.689 | 0.696 | 0.705 | 0.713 | 0.719 | 0.724 | 0.729 |
| Italy                   | 0.636 | 0.639 | 0.643 | 0.647 | 0.653 | 0.662 | 0.666 | 0.675 | 0.688 | 0.694 | 0.701 | 0.71  | 0.717 | 0.724 | 0.731 | 0.738 | 0.744 | 0.75  | 0.756 | 0.762 |
| Luxembourg              | 0.744 | 0.753 | 0.76  | 0.768 | 0.774 | 0.779 | 0.783 | 0.787 | 0.791 | 0.794 | 0.798 | 0.802 | 0.808 | 0.813 | 0.818 | 0.823 | 0.828 | 0.831 | 0.835 | 0.84  |
| Malta                   | 0.623 | 0.627 | 0.632 | 0.635 | 0.639 | 0.646 | 0.656 | 0.665 | 0.673 | 0.68  | 0.687 | 0.694 | 0.7   | 0.706 | 0.71  | 0.714 | 0.717 | 0.72  | 0.723 | 0.726 |
| Netherlands             | 0.718 | 0.727 | 0.736 | 0.746 | 0.754 | 0.761 | 0.767 | 0.773 | 0.777 | 0.781 | 0.786 | 0.791 | 0.796 | 0.799 | 0.803 | 0.807 | 0.811 | 0.815 | 0.819 | 0.823 |
| Norway                  | 0.689 | 0.694 | 0.703 | 0.712 | 0.722 | 0.732 | 0.743 | 0.751 | 0.757 | 0.762 | 0.768 | 0.774 | 0.781 | 0.786 | 0.791 | 0.796 | 0.799 | 0.802 | 0.804 | 0.807 |
| Portugal                | 0.512 | 0.517 | 0.526 | 0.535 | 0.535 | 0.527 | 0.526 | 0.536 | 0.547 | 0.556 | 0.564 | 0.571 | 0.577 | 0.584 | 0.592 | 0.601 | 0.609 | 0.616 | 0.624 | 0.633 |
| Spain                   | 0.581 | 0.582 | 0.586 | 0.591 | 0.596 | 0.599 | 0.601 | 0.608 | 0.617 | 0.625 | 0.634 | 0.644 | 0.653 | 0.661 | 0.668 | 0.676 | 0.683 | 0.691 | 0.698 | 0.707 |
| Sweden                  | 0.703 | 0.705 | 0.71  | 0.715 | 0.721 | 0.73  | 0.738 | 0.744 | 0.749 | 0.753 | 0.757 | 0.763 | 0.768 | 0.773 | 0.776 | 0.779 | 0.78  | 0.781 | 0.781 | 0.781 |
| Stockholm               | 0.75  | 0.752 | 0.757 | 0.763 | 0.769 | 0.777 | 0.784 | 0.789 | 0.794 | 0.797 | 0.802 | 0.807 | 0.811 | 0.815 | 0.817 | 0.819 | 0.82  | 0.821 | 0.822 | 0.823 |
| Sweden except Stockholm | 0.691 | 0.694 | 0.698 | 0.703 | 0.709 | 0.718 | 0.726 | 0.733 | 0.738 | 0.742 | 0.746 | 0.751 | 0.757 | 0.762 | 0.765 | 0.768 | 0.77  | 0.771 | 0.77  | 0.771 |
| Switzerland             | 0.785 | 0.79  | 0.796 | 0.801 | 0.806 | 0.812 | 0.817 | 0.821 | 0.821 | 0.821 | 0.822 | 0.825 | 0.827 | 0.829 | 0.832 | 0.835 | 0.837 | 0.839 | 0.84  | 0.841 |
| United Kingdom          | 0.605 | 0.612 | 0.62  | 0.629 | 0.639 | 0.647 | 0.654 | 0.659 | 0.661 | 0.664 | 0.669 | 0.678 | 0.684 | 0.689 | 0.693 | 0.698 | 0.702 | 0.706 | 0.711 | 0.717 |
| England                 | 0.618 | 0.625 | 0.633 | 0.642 | 0.652 | 0.66  | 0.667 | 0.672 | 0.673 | 0.676 | 0.682 | 0.689 | 0.696 | 0.701 | 0.705 | 0.709 | 0.713 | 0.716 | 0.722 | 0.727 |
| East Midlands           | 0.59  | 0.598 | 0.606 | 0.615 | 0.625 | 0.634 | 0.641 | 0.646 | 0.648 | 0.651 | 0.657 | 0.665 | 0.672 | 0.677 | 0.681 | 0.685 | 0.689 | 0.693 | 0.699 | 0.705 |
| Derby                   | 0.591 | 0.599 | 0.608 | 0.617 | 0.628 | 0.636 | 0.644 | 0.649 | 0.65  | 0.652 | 0.658 | 0.667 | 0.674 | 0.68  | 0.684 | 0.689 | 0.694 | 0.698 | 0.704 | 0.71  |
| Derbyshire              | 0.581 | 0.588 | 0.597 | 0.606 | 0.616 | 0.625 | 0.632 | 0.637 | 0.639 | 0.642 | 0.648 | 0.656 | 0.663 | 0.668 | 0.672 | 0.676 | 0.679 | 0.683 | 0.688 | 0.693 |
| Leicester               | 0.577 | 0.585 | 0.593 | 0.603 | 0.613 | 0.621 | 0.629 | 0.634 | 0.635 | 0.638 | 0.643 | 0.652 | 0.659 | 0.665 | 0.67  | 0.676 | 0.682 | 0.687 | 0.694 | 0.702 |
| Leicestershire          | 0.609 | 0.616 | 0.624 | 0.634 | 0.643 | 0.651 | 0.658 | 0.663 | 0.666 | 0.669 | 0.675 | 0.683 | 0.689 | 0.694 | 0.698 | 0.702 | 0.706 | 0.709 | 0.715 | 0.721 |
| Lincolnshire            | 0.584 | 0.591 | 0.6   | 0.609 | 0.619 | 0.628 | 0.635 | 0.64  | 0.643 | 0.646 | 0.652 | 0.66  | 0.666 | 0.67  | 0.674 | 0.678 | 0.681 | 0.684 | 0.689 | 0.695 |
| Northamptonshire        | 0.593 | 0.6   | 0.609 | 0.619 | 0.629 | 0.638 | 0.646 | 0.651 | 0.653 | 0.656 | 0.662 | 0.671 | 0.677 | 0.682 | 0.686 | 0.69  | 0.693 | 0.697 | 0.702 | 0.708 |
| Nottingham              | 0.607 | 0.614 | 0.622 | 0.632 | 0.641 | 0.649 | 0.657 | 0.662 | 0.664 | 0.667 | 0.673 | 0.681 | 0.688 | 0.694 | 0.7   | 0.705 | 0.71  | 0.715 | 0.721 | 0.728 |
| Nottinghamshire         | 0.579 | 0.587 | 0.595 | 0.604 | 0.614 | 0.622 | 0.629 | 0.634 | 0.637 | 0.64  | 0.645 | 0.653 | 0.66  | 0.664 | 0.668 | 0.672 | 0.676 | 0.68  | 0.685 | 0.691 |
| Rutland                 | 0.609 | 0.617 | 0.625 | 0.634 | 0.644 | 0.652 | 0.659 | 0.663 | 0.665 | 0.667 | 0.673 | 0.681 | 0.687 | 0.692 | 0.697 | 0.702 | 0.708 | 0.712 | 0.719 | 0.725 |
| East of England         | 0.606 | 0.614 | 0.622 | 0.632 | 0.642 | 0.65  | 0.658 | 0.663 | 0.665 | 0.667 | 0.673 | 0.681 | 0.688 | 0.693 | 0.697 | 0.701 | 0.705 | 0.708 | 0.714 | 0.719 |
| Bedford                 | 0.608 | 0.615 | 0.624 | 0.633 | 0.643 | 0.652 | 0.659 | 0.664 | 0.666 | 0.668 | 0.674 | 0.682 | 0.689 | 0.695 | 0.699 | 0.704 | 0.708 | 0.712 | 0.718 | 0.724 |
| Cambridgeshire          | 0.631 | 0.638 | 0.646 | 0.655 | 0.665 | 0.673 | 0.68  | 0.685 | 0.688 | 0.691 | 0.697 | 0.704 | 0.711 | 0.715 | 0.72  | 0.724 | 0.728 | 0.732 | 0.738 | 0.744 |
| Central Bedfordshire    | 0.602 | 0.609 | 0.618 | 0.628 | 0.638 | 0.647 | 0.655 | 0.66  | 0.661 | 0.663 | 0.669 | 0.678 | 0.684 | 0.689 | 0.694 | 0.698 | 0.702 | 0.707 | 0.712 | 0.718 |
| Essex                   | 0.597 | 0.605 | 0.613 | 0.623 | 0.632 | 0.641 | 0.648 | 0.653 | 0.656 | 0.658 | 0.664 | 0.672 | 0.678 | 0.683 | 0.687 | 0.691 | 0.694 | 0.698 | 0.703 | 0.708 |
| Hertfordshire           | 0.631 | 0.638 | 0.646 | 0.655 | 0.665 | 0.673 | 0.681 | 0.686 | 0.688 | 0.691 | 0.697 | 0.705 | 0.711 | 0.716 | 0.72  | 0.725 | 0.729 | 0.732 | 0.738 | 0.743 |
| Luton                   | 0.586 | 0.594 | 0.603 | 0.613 | 0.624 | 0.633 | 0.641 | 0.646 | 0.648 | 0.65  | 0.655 | 0.664 | 0.671 | 0.677 | 0.681 | 0.685 | 0.689 | 0.693 | 0.699 | 0.705 |
| Norfolk                 | 0.596 | 0.603 | 0.612 | 0.621 | 0.631 | 0.64  | 0.647 | 0.652 | 0.654 | 0.657 | 0.663 | 0.671 | 0.677 | 0.682 | 0.686 | 0.69  | 0.694 | 0.697 | 0.702 | 0.707 |
| Peterborough            | 0.592 | 0.6   | 0.609 | 0.619 | 0.63  | 0.64  | 0.648 | 0.653 | 0.654 | 0.656 | 0.662 | 0.671 | 0.678 | 0.684 | 0.688 | 0.693 | 0.697 | 0.7   | 0.705 | 0.71  |
| Southend-on-Sea         | 0.575 | 0.583 | 0.591 | 0.601 | 0.611 | 0.619 | 0.627 | 0.632 | 0.634 | 0.637 | 0.643 | 0.652 | 0.658 | 0.663 | 0.667 | 0.671 | 0.676 | 0.68  | 0.686 | 0.691 |
| Suffolk                 | 0.593 | 0.601 | 0.61  | 0.62  | 0.63  | 0.639 | 0.647 | 0.651 | 0.653 | 0.655 | 0.661 | 0.669 | 0.676 | 0.681 | 0.685 | 0.69  | 0.694 | 0.697 | 0.703 | 0.708 |
| Thurrock                | 0.595 | 0.603 | 0.611 | 0.621 | 0.631 | 0.64  | 0.647 | 0.652 | 0.654 | 0.656 | 0.662 | 0.67  | 0.676 | 0.68  | 0.684 | 0.688 | 0.691 | 0.695 | 0.7   | 0.705 |
| Greater London          | 0.665 | 0.672 | 0.68  | 0.688 | 0.697 | 0.705 | 0.712 | 0.717 | 0.719 | 0.721 | 0.727 | 0.735 | 0.741 | 0.746 | 0.75  | 0.755 | 0.759 | 0.763 | 0.768 | 0.774 |
| Barking and Dagenham    | 0.592 | 0.6   | 0.609 | 0.618 | 0.628 | 0.637 | 0.644 | 0.649 |       |       |       |       |       |       |       |       |       |       |       |       |



**Appendix Table 10. Socio-demographic Index values for all estimated GBD 2017 locations, 1970–1989**

| Location                  | 1970  | 1971  | 1972  | 1973  | 1974  | 1975  | 1976  | 1977  | 1978  | 1979  | 1980  | 1981  | 1982  | 1983  | 1984  | 1985  | 1986  | 1987  | 1988  | 1989  |
|---------------------------|-------|-------|-------|-------|-------|-------|-------|-------|-------|-------|-------|-------|-------|-------|-------|-------|-------|-------|-------|-------|
| Havering                  | 0.613 | 0.621 | 0.628 | 0.637 | 0.646 | 0.654 | 0.661 | 0.666 | 0.668 | 0.671 | 0.677 | 0.684 | 0.69  | 0.694 | 0.697 | 0.7   | 0.703 | 0.705 | 0.71  | 0.715 |
| Hillingdon                | 0.665 | 0.672 | 0.681 | 0.69  | 0.699 | 0.708 | 0.715 | 0.72  | 0.722 | 0.725 | 0.731 | 0.739 | 0.746 | 0.751 | 0.755 | 0.759 | 0.763 | 0.766 | 0.771 | 0.776 |
| Hounslow                  | 0.648 | 0.656 | 0.664 | 0.674 | 0.684 | 0.693 | 0.7   | 0.705 | 0.707 | 0.71  | 0.716 | 0.724 | 0.731 | 0.736 | 0.74  | 0.744 | 0.748 | 0.752 | 0.757 | 0.764 |
| Islington                 | 0.702 | 0.709 | 0.717 | 0.726 | 0.736 | 0.744 | 0.751 | 0.755 | 0.756 | 0.757 | 0.762 | 0.769 | 0.775 | 0.779 | 0.784 | 0.789 | 0.793 | 0.796 | 0.801 | 0.806 |
| Kensington and Chelsea    | 0.73  | 0.736 | 0.742 | 0.75  | 0.757 | 0.764 | 0.77  | 0.775 | 0.778 | 0.782 | 0.787 | 0.793 | 0.799 | 0.804 | 0.808 | 0.813 | 0.817 | 0.821 | 0.826 | 0.833 |
| Kingston upon Thames      | 0.674 | 0.681 | 0.688 | 0.695 | 0.703 | 0.711 | 0.717 | 0.721 | 0.724 | 0.727 | 0.733 | 0.739 | 0.745 | 0.75  | 0.754 | 0.759 | 0.764 | 0.768 | 0.775 | 0.781 |
| Lambeth                   | 0.647 | 0.655 | 0.663 | 0.672 | 0.682 | 0.69  | 0.698 | 0.702 | 0.705 | 0.707 | 0.713 | 0.721 | 0.728 | 0.734 | 0.739 | 0.745 | 0.751 | 0.756 | 0.762 | 0.769 |
| Lewisham                  | 0.612 | 0.619 | 0.627 | 0.636 | 0.645 | 0.653 | 0.66  | 0.665 | 0.667 | 0.67  | 0.675 | 0.683 | 0.69  | 0.696 | 0.701 | 0.707 | 0.712 | 0.716 | 0.722 | 0.728 |
| Merton                    | 0.639 | 0.646 | 0.654 | 0.663 | 0.673 | 0.681 | 0.688 | 0.693 | 0.695 | 0.698 | 0.704 | 0.711 | 0.718 | 0.722 | 0.726 | 0.731 | 0.736 | 0.74  | 0.746 | 0.752 |
| Newham                    | 0.592 | 0.601 | 0.61  | 0.62  | 0.631 | 0.64  | 0.648 | 0.653 | 0.655 | 0.657 | 0.663 | 0.673 | 0.68  | 0.685 | 0.69  | 0.694 | 0.698 | 0.702 | 0.707 | 0.712 |
| Redbridge                 | 0.615 | 0.623 | 0.63  | 0.639 | 0.649 | 0.657 | 0.664 | 0.669 | 0.671 | 0.674 | 0.68  | 0.688 | 0.694 | 0.698 | 0.702 | 0.706 | 0.71  | 0.713 | 0.718 | 0.723 |
| Richmond upon Thames      | 0.683 | 0.69  | 0.697 | 0.705 | 0.713 | 0.72  | 0.727 | 0.731 | 0.734 | 0.737 | 0.743 | 0.749 | 0.755 | 0.76  | 0.764 | 0.768 | 0.773 | 0.777 | 0.782 | 0.789 |
| Southwark                 | 0.664 | 0.672 | 0.68  | 0.69  | 0.7   | 0.708 | 0.715 | 0.72  | 0.722 | 0.725 | 0.731 | 0.74  | 0.746 | 0.753 | 0.758 | 0.763 | 0.769 | 0.774 | 0.78  | 0.787 |
| Sutton                    | 0.621 | 0.629 | 0.637 | 0.646 | 0.656 | 0.664 | 0.671 | 0.676 | 0.679 | 0.682 | 0.688 | 0.695 | 0.702 | 0.706 | 0.71  | 0.713 | 0.716 | 0.72  | 0.725 | 0.73  |
| Tower Hamlets             | 0.645 | 0.653 | 0.662 | 0.672 | 0.683 | 0.692 | 0.7   | 0.704 | 0.703 | 0.703 | 0.708 | 0.717 | 0.724 | 0.729 | 0.734 | 0.739 | 0.745 | 0.749 | 0.755 | 0.761 |
| Waltham Forest            | 0.592 | 0.6   | 0.608 | 0.618 | 0.628 | 0.636 | 0.643 | 0.648 | 0.65  | 0.653 | 0.659 | 0.667 | 0.673 | 0.679 | 0.683 | 0.688 | 0.692 | 0.696 | 0.702 | 0.707 |
| Wandsworth                | 0.667 | 0.674 | 0.681 | 0.689 | 0.698 | 0.705 | 0.712 | 0.716 | 0.718 | 0.721 | 0.727 | 0.734 | 0.741 | 0.747 | 0.753 | 0.76  | 0.766 | 0.772 | 0.78  | 0.787 |
| Westminster               | 0.739 | 0.745 | 0.751 | 0.758 | 0.766 | 0.772 | 0.778 | 0.782 | 0.784 | 0.787 | 0.791 | 0.797 | 0.802 | 0.806 | 0.808 | 0.811 | 0.814 | 0.817 | 0.821 | 0.826 |
| North East England        | 0.573 | 0.581 | 0.59  | 0.6   | 0.61  | 0.619 | 0.627 | 0.632 | 0.634 | 0.637 | 0.643 | 0.651 | 0.658 | 0.663 | 0.667 | 0.671 | 0.676 | 0.679 | 0.685 | 0.691 |
| County Durham             | 0.568 | 0.576 | 0.585 | 0.594 | 0.604 | 0.613 | 0.62  | 0.626 | 0.628 | 0.631 | 0.637 | 0.645 | 0.652 | 0.658 | 0.662 | 0.667 | 0.671 | 0.674 | 0.679 | 0.685 |
| Darlington                | 0.583 | 0.591 | 0.6   | 0.611 | 0.622 | 0.631 | 0.639 | 0.644 | 0.646 | 0.649 | 0.655 | 0.664 | 0.671 | 0.676 | 0.68  | 0.684 | 0.687 | 0.689 | 0.693 | 0.698 |
| Gateshead                 | 0.577 | 0.585 | 0.594 | 0.604 | 0.614 | 0.623 | 0.631 | 0.636 | 0.638 | 0.64  | 0.646 | 0.655 | 0.661 | 0.666 | 0.67  | 0.674 | 0.679 | 0.682 | 0.688 | 0.694 |
| Hartlepool                | 0.556 | 0.564 | 0.573 | 0.584 | 0.595 | 0.604 | 0.612 | 0.617 | 0.619 | 0.621 | 0.627 | 0.636 | 0.643 | 0.648 | 0.651 | 0.655 | 0.658 | 0.661 | 0.666 | 0.672 |
| Middlesbrough             | 0.56  | 0.569 | 0.578 | 0.588 | 0.599 | 0.609 | 0.617 | 0.622 | 0.623 | 0.625 | 0.631 | 0.64  | 0.647 | 0.652 | 0.656 | 0.66  | 0.665 | 0.669 | 0.675 | 0.682 |
| Newcastle upon Tyne       | 0.609 | 0.617 | 0.625 | 0.634 | 0.643 | 0.651 | 0.658 | 0.663 | 0.666 | 0.669 | 0.675 | 0.683 | 0.689 | 0.695 | 0.699 | 0.704 | 0.709 | 0.715 | 0.721 | 0.729 |
| North Tyneside            | 0.576 | 0.584 | 0.592 | 0.602 | 0.612 | 0.621 | 0.629 | 0.634 | 0.636 | 0.639 | 0.645 | 0.653 | 0.659 | 0.664 | 0.668 | 0.671 | 0.675 | 0.679 | 0.685 | 0.691 |
| Northumberland            | 0.574 | 0.582 | 0.591 | 0.601 | 0.611 | 0.62  | 0.628 | 0.633 | 0.635 | 0.638 | 0.644 | 0.653 | 0.66  | 0.665 | 0.67  | 0.674 | 0.678 | 0.681 | 0.687 | 0.692 |
| Redcar and Cleveland      | 0.549 | 0.557 | 0.566 | 0.576 | 0.587 | 0.596 | 0.604 | 0.608 | 0.61  | 0.612 | 0.618 | 0.627 | 0.634 | 0.639 | 0.643 | 0.646 | 0.65  | 0.653 | 0.659 | 0.665 |
| South Tyneside            | 0.545 | 0.553 | 0.562 | 0.572 | 0.582 | 0.591 | 0.599 | 0.604 | 0.606 | 0.609 | 0.615 | 0.623 | 0.629 | 0.633 | 0.636 | 0.639 | 0.643 | 0.646 | 0.652 | 0.659 |
| Stockton-on-Tees          | 0.581 | 0.589 | 0.598 | 0.609 | 0.62  | 0.629 | 0.637 | 0.642 | 0.644 | 0.646 | 0.652 | 0.661 | 0.667 | 0.672 | 0.676 | 0.68  | 0.684 | 0.687 | 0.693 | 0.699 |
| Sunderland                | 0.563 | 0.571 | 0.58  | 0.59  | 0.601 | 0.61  | 0.618 | 0.623 | 0.624 | 0.626 | 0.632 | 0.641 | 0.648 | 0.654 | 0.658 | 0.663 | 0.667 | 0.671 | 0.677 | 0.684 |
| North West England        | 0.6   | 0.608 | 0.616 | 0.625 | 0.635 | 0.643 | 0.65  | 0.655 | 0.657 | 0.659 | 0.665 | 0.673 | 0.679 | 0.684 | 0.688 | 0.692 | 0.696 | 0.7   | 0.705 | 0.711 |
| Blackburn with Darwen     | 0.569 | 0.577 | 0.586 | 0.597 | 0.608 | 0.617 | 0.625 | 0.63  | 0.631 | 0.633 | 0.639 | 0.648 | 0.655 | 0.661 | 0.665 | 0.669 | 0.673 | 0.676 | 0.681 | 0.687 |
| Blackpool                 | 0.569 | 0.576 | 0.585 | 0.594 | 0.604 | 0.612 | 0.62  | 0.625 | 0.628 | 0.631 | 0.637 | 0.645 | 0.651 | 0.655 | 0.658 | 0.661 | 0.663 | 0.666 | 0.671 | 0.676 |
| Bolton                    | 0.583 | 0.591 | 0.599 | 0.609 | 0.619 | 0.628 | 0.635 | 0.64  | 0.641 | 0.644 | 0.649 | 0.658 | 0.664 | 0.669 | 0.673 | 0.677 | 0.681 | 0.685 | 0.69  | 0.696 |
| Bury                      | 0.589 | 0.597 | 0.605 | 0.615 | 0.624 | 0.632 | 0.64  | 0.644 | 0.646 | 0.649 | 0.655 | 0.663 | 0.669 | 0.673 | 0.677 | 0.68  | 0.684 | 0.687 | 0.692 | 0.698 |
| Cheshire East             | 0.635 | 0.642 | 0.65  | 0.659 | 0.669 | 0.677 | 0.684 | 0.688 | 0.691 | 0.693 | 0.699 | 0.707 | 0.712 | 0.717 | 0.721 | 0.725 | 0.728 | 0.732 | 0.737 | 0.743 |
| Cheshire West and Chester | 0.626 | 0.633 | 0.641 | 0.65  | 0.66  | 0.668 | 0.675 | 0.679 | 0.681 | 0.684 | 0.69  | 0.697 | 0.703 | 0.708 | 0.712 | 0.716 | 0.72  | 0.723 | 0.729 | 0.735 |
| Cumbria                   | 0.606 | 0.614 | 0.622 | 0.631 | 0.641 | 0.649 | 0.656 | 0.661 | 0.663 | 0.665 | 0.671 | 0.679 | 0.685 | 0.69  | 0.694 | 0.698 | 0.702 | 0.705 | 0.71  | 0.715 |
| Halton                    | 0.586 | 0.594 | 0.603 | 0.613 | 0.624 | 0.632 | 0.64  | 0.645 | 0.647 | 0.649 | 0.655 | 0.663 | 0.669 | 0.674 | 0.677 | 0.68  | 0.683 | 0.686 | 0.692 | 0.698 |
| Knowsley                  | 0.575 | 0.582 | 0.591 | 0.6   | 0.61  | 0.618 | 0.626 | 0.63  | 0.632 | 0.634 | 0.639 | 0.648 | 0.654 | 0.659 | 0.664 | 0.668 | 0.672 | 0.675 | 0.68  | 0.686 |
| Lancashire                | 0.603 | 0.611 | 0.619 | 0.629 | 0.638 | 0.647 | 0.654 | 0.659 | 0.661 | 0.663 | 0.669 | 0.677 | 0.683 | 0.688 | 0.692 | 0.696 | 0.7   | 0.703 | 0.708 | 0.715 |
| Liverpool                 | 0.602 | 0.609 | 0.617 | 0.626 | 0.635 | 0.642 | 0.649 | 0.654 | 0.656 | 0.659 | 0.664 | 0.672 | 0.678 | 0.683 | 0.687 | 0.692 | 0.697 | 0.702 | 0.708 | 0.715 |
| Manchester                | 0.623 | 0.63  | 0.638 | 0.647 | 0.657 | 0.665 | 0.672 | 0.677 | 0.679 | 0.682 | 0.688 | 0.696 | 0.703 | 0.709 | 0.713 | 0.718 | 0.723 | 0.728 | 0.734 | 0.741 |
| Oldham                    | 0.569 | 0.577 | 0.586 | 0.596 | 0.606 | 0.615 | 0.622 | 0.627 | 0.628 | 0.631 | 0.636 | 0.645 | 0.652 | 0.657 | 0.66  | 0.664 | 0.668 | 0.671 | 0.676 | 0.681 |
| Rochdale                  | 0.571 | 0.579 | 0.588 | 0.598 | 0.608 | 0.617 | 0.624 | 0.629 | 0.631 | 0.633 | 0.639 | 0.648 | 0.654 | 0.659 | 0.663 | 0.666 | 0.67  | 0.672 | 0.677 | 0.682 |
| Salford                   | 0.592 | 0.599 | 0.608 | 0.617 | 0.627 | 0.636 | 0.643 | 0.648 | 0.65  | 0.652 | 0.658 | 0.666 | 0.672 | 0.677 | 0.681 | 0.685 | 0.689 | 0.692 | 0.697 | 0.703 |
| Sefton                    | 0.593 | 0.601 | 0.608 | 0.617 | 0.627 | 0.634 | 0.641 | 0.646 | 0.648 | 0.651 | 0.656 | 0.664 | 0.67  | 0.674 | 0.678 | 0.682 | 0.686 | 0.689 | 0.694 | 0.701 |
| St Helens                 | 0.571 | 0.579 | 0.587 | 0.596 | 0.605 | 0.613 | 0.62  | 0.625 | 0.627 | 0.629 | 0.635 | 0.643 | 0.65  | 0.655 | 0.659 | 0.663 | 0.667 | 0.67  | 0.675 | 0.68  |
| Stockport                 | 0.613 | 0.62  | 0.628 | 0.637 | 0.646 | 0.654 | 0.661 | 0.666 | 0.668 | 0.67  | 0.676 | 0.683 | 0.69  | 0.694 | 0.698 | 0.702 | 0.706 | 0.71  | 0.715 | 0.722 |
| Tameside                  | 0.577 | 0.584 | 0.593 | 0.602 | 0.612 | 0.62  | 0.628 | 0.633 | 0.634 | 0.637 | 0.643 | 0.651 | 0.657 | 0.662 | 0.666 | 0.669 | 0.673 | 0.676 | 0.681 | 0.687 |
| Trafford                  | 0.635 | 0.642 | 0.65  | 0.659 | 0.669 | 0.677 | 0.684 | 0.689 | 0.691 | 0.693 | 0.699 | 0.706 | 0.712 | 0.717 | 0.721 | 0.725 | 0.73  | 0.734 | 0.739 | 0.745 |
| Warrington                | 0.623 | 0.63  | 0.638 | 0.648 | 0.658 | 0.666 | 0.673 | 0.678 | 0.68  | 0.682 | 0.688 | 0.696 | 0.702 | 0.707 | 0.711 | 0.715 | 0.719 | 0.722 | 0.728 | 0.734 |
| Wigan                     | 0.575 | 0.583 | 0.591 | 0.601 | 0.61  | 0.619 | 0.626 | 0.631 | 0.632 | 0.635 | 0.64  | 0.648 | 0.655 | 0.66  | 0.664 | 0.668 | 0.672 | 0.676 | 0.681 | 0.687 |
| Wirral                    | 0.581 | 0.589 | 0.597 | 0.607 | 0.616 | 0.625 | 0.632 | 0.637 | 0.638 | 0.641 | 0.647 | 0.655 | 0.661 | 0.666 | 0.669 | 0.673 | 0.676 | 0.679 | 0.685 | 0.69  |
| South East England        | 0.639 | 0.646 | 0.654 | 0.663 | 0.672 | 0.68  | 0.687 | 0.692 | 0.694 | 0.696 | 0.701 | 0.709 | 0.715 | 0.72  | 0.724 | 0.727 | 0.731 | 0.735 | 0.739 | 0.745 |
| Bracknell Forest          | 0.645 | 0.653 | 0.66  | 0.669 | 0.679 | 0.687 | 0.694 | 0.698 | 0.699 | 0.701 | 0.707 | 0.715 | 0.721 | 0.727 | 0.732 | 0.736 | 0.74  | 0.744 | 0.749 | 0.755 |
| Brighton and Hove         | 0.654 | 0.66  | 0.667 | 0.674 | 0.    |       |       |       |       |       |       |       |       |       |       |       |       |       |       |       |



**Appendix Table 10. Socio-demographic Index values for all estimated GBD 2017 locations, 1970–1989**

| Location                     | 1970  | 1971  | 1972  | 1973  | 1974  | 1975  | 1976  | 1977  | 1978  | 1979  | 1980  | 1981  | 1982  | 1983  | 1984  | 1985  | 1986  | 1987  | 1988  | 1989  |
|------------------------------|-------|-------|-------|-------|-------|-------|-------|-------|-------|-------|-------|-------|-------|-------|-------|-------|-------|-------|-------|-------|
| West Berkshire               | 0.659 | 0.667 | 0.675 | 0.685 | 0.695 | 0.703 | 0.711 | 0.715 | 0.717 | 0.719 | 0.724 | 0.733 | 0.739 | 0.743 | 0.747 | 0.751 | 0.755 | 0.758 | 0.764 | 0.769 |
| West Sussex                  | 0.629 | 0.636 | 0.644 | 0.654 | 0.663 | 0.671 | 0.678 | 0.683 | 0.684 | 0.687 | 0.692 | 0.7   | 0.706 | 0.711 | 0.715 | 0.719 | 0.722 | 0.725 | 0.73  | 0.735 |
| Windsor and Maidenhead       | 0.67  | 0.677 | 0.685 | 0.693 | 0.702 | 0.71  | 0.717 | 0.721 | 0.723 | 0.725 | 0.731 | 0.738 | 0.744 | 0.748 | 0.752 | 0.756 | 0.761 | 0.764 | 0.769 | 0.774 |
| Wokingham                    | 0.67  | 0.677 | 0.684 | 0.693 | 0.701 | 0.709 | 0.715 | 0.72  | 0.722 | 0.724 | 0.729 | 0.736 | 0.741 | 0.745 | 0.749 | 0.753 | 0.757 | 0.761 | 0.767 | 0.773 |
| South West England           | 0.614 | 0.622 | 0.63  | 0.639 | 0.648 | 0.656 | 0.664 | 0.668 | 0.67  | 0.673 | 0.679 | 0.687 | 0.693 | 0.698 | 0.702 | 0.705 | 0.709 | 0.713 | 0.718 | 0.724 |
| Bath and North East Somerset | 0.64  | 0.647 | 0.654 | 0.662 | 0.67  | 0.676 | 0.683 | 0.688 | 0.691 | 0.694 | 0.699 | 0.706 | 0.712 | 0.717 | 0.721 | 0.725 | 0.73  | 0.734 | 0.74  | 0.746 |
| Bournemouth                  | 0.62  | 0.627 | 0.634 | 0.642 | 0.65  | 0.657 | 0.664 | 0.669 | 0.672 | 0.675 | 0.681 | 0.688 | 0.694 | 0.698 | 0.703 | 0.708 | 0.713 | 0.718 | 0.724 | 0.73  |
| Bristol, City of             | 0.644 | 0.651 | 0.659 | 0.667 | 0.676 | 0.684 | 0.691 | 0.696 | 0.698 | 0.701 | 0.706 | 0.714 | 0.72  | 0.726 | 0.73  | 0.735 | 0.74  | 0.744 | 0.751 | 0.757 |
| Cornwall                     | 0.585 | 0.593 | 0.602 | 0.611 | 0.621 | 0.63  | 0.637 | 0.642 | 0.644 | 0.646 | 0.652 | 0.66  | 0.666 | 0.67  | 0.674 | 0.677 | 0.681 | 0.684 | 0.689 | 0.695 |
| Devon                        | 0.606 | 0.614 | 0.622 | 0.631 | 0.64  | 0.648 | 0.655 | 0.66  | 0.662 | 0.665 | 0.671 | 0.679 | 0.685 | 0.69  | 0.693 | 0.697 | 0.701 | 0.704 | 0.709 | 0.715 |
| Dorset                       | 0.605 | 0.613 | 0.621 | 0.63  | 0.64  | 0.648 | 0.655 | 0.66  | 0.662 | 0.665 | 0.671 | 0.679 | 0.685 | 0.689 | 0.692 | 0.696 | 0.699 | 0.702 | 0.707 | 0.712 |
| Gloucestershire              | 0.62  | 0.627 | 0.635 | 0.644 | 0.654 | 0.662 | 0.669 | 0.674 | 0.676 | 0.679 | 0.684 | 0.692 | 0.699 | 0.704 | 0.708 | 0.712 | 0.716 | 0.719 | 0.724 | 0.73  |
| North Somerset               | 0.598 | 0.605 | 0.614 | 0.623 | 0.633 | 0.641 | 0.648 | 0.653 | 0.655 | 0.657 | 0.663 | 0.671 | 0.677 | 0.682 | 0.687 | 0.691 | 0.694 | 0.698 | 0.704 | 0.71  |
| Plymouth                     | 0.601 | 0.608 | 0.616 | 0.626 | 0.636 | 0.644 | 0.651 | 0.656 | 0.658 | 0.66  | 0.666 | 0.674 | 0.681 | 0.687 | 0.692 | 0.697 | 0.702 | 0.706 | 0.713 | 0.719 |
| Poole                        | 0.613 | 0.62  | 0.629 | 0.639 | 0.648 | 0.657 | 0.664 | 0.669 | 0.671 | 0.674 | 0.68  | 0.687 | 0.693 | 0.697 | 0.7   | 0.704 | 0.708 | 0.712 | 0.717 | 0.723 |
| Somerset                     | 0.6   | 0.608 | 0.616 | 0.626 | 0.636 | 0.645 | 0.652 | 0.657 | 0.659 | 0.661 | 0.667 | 0.675 | 0.682 | 0.687 | 0.69  | 0.694 | 0.697 | 0.699 | 0.704 | 0.708 |
| South Gloucestershire        | 0.633 | 0.641 | 0.649 | 0.658 | 0.667 | 0.676 | 0.683 | 0.688 | 0.69  | 0.693 | 0.698 | 0.706 | 0.712 | 0.717 | 0.721 | 0.725 | 0.729 | 0.732 | 0.738 | 0.743 |
| Swindon                      | 0.628 | 0.636 | 0.644 | 0.654 | 0.664 | 0.673 | 0.681 | 0.686 | 0.687 | 0.689 | 0.695 | 0.703 | 0.71  | 0.715 | 0.719 | 0.723 | 0.727 | 0.73  | 0.736 | 0.742 |
| Torbay                       | 0.584 | 0.592 | 0.601 | 0.61  | 0.62  | 0.628 | 0.636 | 0.641 | 0.643 | 0.646 | 0.652 | 0.66  | 0.665 | 0.669 | 0.672 | 0.676 | 0.68  | 0.683 | 0.689 | 0.694 |
| Wiltshire                    | 0.612 | 0.62  | 0.628 | 0.638 | 0.648 | 0.656 | 0.664 | 0.668 | 0.67  | 0.672 | 0.677 | 0.686 | 0.693 | 0.698 | 0.702 | 0.706 | 0.71  | 0.713 | 0.718 | 0.722 |
| West Midlands                | 0.588 | 0.595 | 0.604 | 0.613 | 0.623 | 0.632 | 0.639 | 0.644 | 0.646 | 0.649 | 0.655 | 0.663 | 0.669 | 0.674 | 0.679 | 0.683 | 0.687 | 0.69  | 0.696 | 0.702 |
| Birmingham                   | 0.582 | 0.59  | 0.598 | 0.608 | 0.618 | 0.627 | 0.635 | 0.639 | 0.641 | 0.643 | 0.649 | 0.658 | 0.665 | 0.67  | 0.675 | 0.68  | 0.685 | 0.689 | 0.695 | 0.702 |
| Coventry                     | 0.601 | 0.608 | 0.617 | 0.626 | 0.636 | 0.644 | 0.652 | 0.656 | 0.658 | 0.661 | 0.666 | 0.674 | 0.681 | 0.686 | 0.69  | 0.694 | 0.698 | 0.702 | 0.709 | 0.716 |
| Dudley                       | 0.576 | 0.583 | 0.592 | 0.601 | 0.611 | 0.619 | 0.627 | 0.632 | 0.633 | 0.636 | 0.642 | 0.65  | 0.656 | 0.661 | 0.665 | 0.669 | 0.673 | 0.677 | 0.682 | 0.688 |
| Herefordshire, County of     | 0.591 | 0.599 | 0.607 | 0.617 | 0.627 | 0.635 | 0.643 | 0.648 | 0.65  | 0.653 | 0.659 | 0.667 | 0.674 | 0.678 | 0.682 | 0.685 | 0.688 | 0.691 | 0.695 | 0.701 |
| Sandwell                     | 0.563 | 0.571 | 0.579 | 0.589 | 0.599 | 0.608 | 0.615 | 0.62  | 0.621 | 0.623 | 0.629 | 0.638 | 0.645 | 0.65  | 0.654 | 0.658 | 0.663 | 0.666 | 0.672 | 0.678 |
| Shropshire                   | 0.594 | 0.601 | 0.61  | 0.619 | 0.629 | 0.637 | 0.645 | 0.65  | 0.652 | 0.655 | 0.661 | 0.669 | 0.675 | 0.679 | 0.683 | 0.687 | 0.69  | 0.693 | 0.698 | 0.704 |
| Solihull                     | 0.621 | 0.629 | 0.637 | 0.647 | 0.656 | 0.665 | 0.672 | 0.677 | 0.679 | 0.682 | 0.688 | 0.695 | 0.701 | 0.706 | 0.709 | 0.712 | 0.715 | 0.718 | 0.723 | 0.728 |
| Staffordshire                | 0.592 | 0.599 | 0.607 | 0.617 | 0.627 | 0.635 | 0.642 | 0.647 | 0.649 | 0.652 | 0.658 | 0.666 | 0.672 | 0.677 | 0.68  | 0.684 | 0.688 | 0.691 | 0.696 | 0.702 |
| Stoke-on-Trent               | 0.569 | 0.576 | 0.584 | 0.594 | 0.604 | 0.612 | 0.62  | 0.624 | 0.626 | 0.628 | 0.634 | 0.643 | 0.649 | 0.655 | 0.659 | 0.664 | 0.668 | 0.672 | 0.677 | 0.684 |
| Telford and Wrekin           | 0.592 | 0.6   | 0.609 | 0.619 | 0.63  | 0.639 | 0.647 | 0.652 | 0.653 | 0.655 | 0.661 | 0.67  | 0.677 | 0.683 | 0.687 | 0.691 | 0.695 | 0.698 | 0.703 | 0.709 |
| Walsall                      | 0.565 | 0.572 | 0.581 | 0.59  | 0.6   | 0.609 | 0.616 | 0.621 | 0.623 | 0.625 | 0.631 | 0.639 | 0.646 | 0.651 | 0.655 | 0.659 | 0.663 | 0.666 | 0.671 | 0.676 |
| Warwickshire                 | 0.615 | 0.622 | 0.63  | 0.64  | 0.65  | 0.658 | 0.665 | 0.67  | 0.672 | 0.675 | 0.681 | 0.689 | 0.695 | 0.7   | 0.704 | 0.707 | 0.711 | 0.715 | 0.72  | 0.726 |
| Wolverhampton                | 0.573 | 0.581 | 0.589 | 0.599 | 0.609 | 0.618 | 0.625 | 0.63  | 0.631 | 0.634 | 0.64  | 0.648 | 0.655 | 0.66  | 0.664 | 0.668 | 0.672 | 0.675 | 0.68  | 0.686 |
| Worcestershire               | 0.591 | 0.599 | 0.607 | 0.617 | 0.626 | 0.635 | 0.642 | 0.647 | 0.65  | 0.653 | 0.659 | 0.666 | 0.673 | 0.678 | 0.681 | 0.685 | 0.688 | 0.692 | 0.697 | 0.702 |
| Yorkshire and the Humber     | 0.59  | 0.598 | 0.606 | 0.616 | 0.626 | 0.634 | 0.642 | 0.647 | 0.649 | 0.652 | 0.658 | 0.666 | 0.672 | 0.677 | 0.681 | 0.686 | 0.69  | 0.694 | 0.699 | 0.705 |
| Barnsley                     | 0.558 | 0.566 | 0.575 | 0.584 | 0.594 | 0.603 | 0.61  | 0.615 | 0.617 | 0.619 | 0.625 | 0.634 | 0.64  | 0.645 | 0.649 | 0.653 | 0.657 | 0.661 | 0.665 | 0.671 |
| Bradford                     | 0.567 | 0.575 | 0.584 | 0.595 | 0.605 | 0.615 | 0.623 | 0.627 | 0.629 | 0.631 | 0.637 | 0.646 | 0.653 | 0.658 | 0.663 | 0.668 | 0.672 | 0.676 | 0.682 | 0.688 |
| Calderdale                   | 0.585 | 0.593 | 0.602 | 0.612 | 0.623 | 0.632 | 0.64  | 0.645 | 0.647 | 0.649 | 0.655 | 0.664 | 0.67  | 0.675 | 0.679 | 0.683 | 0.687 | 0.691 | 0.697 | 0.703 |
| Doncaster                    | 0.557 | 0.566 | 0.574 | 0.584 | 0.595 | 0.603 | 0.611 | 0.616 | 0.618 | 0.62  | 0.626 | 0.635 | 0.641 | 0.646 | 0.649 | 0.653 | 0.657 | 0.66  | 0.665 | 0.67  |
| East Riding of Yorkshire     | 0.598 | 0.605 | 0.614 | 0.623 | 0.633 | 0.641 | 0.648 | 0.653 | 0.656 | 0.659 | 0.665 | 0.673 | 0.679 | 0.684 | 0.687 | 0.691 | 0.694 | 0.698 | 0.703 | 0.709 |
| Kingston upon Hull, City of  | 0.567 | 0.576 | 0.584 | 0.594 | 0.605 | 0.613 | 0.621 | 0.626 | 0.628 | 0.631 | 0.637 | 0.645 | 0.652 | 0.657 | 0.66  | 0.664 | 0.668 | 0.672 | 0.677 | 0.683 |
| Kirklees                     | 0.579 | 0.587 | 0.596 | 0.606 | 0.616 | 0.624 | 0.632 | 0.637 | 0.639 | 0.641 | 0.647 | 0.656 | 0.662 | 0.668 | 0.672 | 0.677 | 0.681 | 0.685 | 0.691 | 0.697 |
| Leeds                        | 0.617 | 0.624 | 0.632 | 0.641 | 0.65  | 0.657 | 0.664 | 0.669 | 0.672 | 0.675 | 0.681 | 0.688 | 0.695 | 0.7   | 0.705 | 0.709 | 0.714 | 0.719 | 0.725 | 0.732 |
| North East Lincolnshire      | 0.578 | 0.586 | 0.595 | 0.606 | 0.617 | 0.626 | 0.634 | 0.639 | 0.641 | 0.643 | 0.649 | 0.658 | 0.664 | 0.669 | 0.672 | 0.675 | 0.679 | 0.682 | 0.687 | 0.693 |
| North Lincolnshire           | 0.585 | 0.593 | 0.602 | 0.612 | 0.622 | 0.631 | 0.639 | 0.644 | 0.645 | 0.648 | 0.654 | 0.662 | 0.669 | 0.674 | 0.677 | 0.681 | 0.685 | 0.687 | 0.692 | 0.698 |
| North Yorkshire              | 0.607 | 0.615 | 0.623 | 0.633 | 0.643 | 0.651 | 0.658 | 0.663 | 0.666 | 0.669 | 0.675 | 0.683 | 0.689 | 0.694 | 0.698 | 0.702 | 0.705 | 0.709 | 0.714 | 0.719 |
| Rotherham                    | 0.565 | 0.573 | 0.582 | 0.592 | 0.602 | 0.61  | 0.618 | 0.623 | 0.624 | 0.627 | 0.633 | 0.641 | 0.648 | 0.653 | 0.656 | 0.66  | 0.664 | 0.667 | 0.672 | 0.677 |
| Sheffield                    | 0.609 | 0.616 | 0.624 | 0.633 | 0.641 | 0.649 | 0.656 | 0.661 | 0.664 | 0.667 | 0.673 | 0.681 | 0.687 | 0.692 | 0.696 | 0.7   | 0.705 | 0.709 | 0.715 | 0.721 |
| Wakefield                    | 0.574 | 0.582 | 0.591 | 0.601 | 0.611 | 0.62  | 0.627 | 0.632 | 0.634 | 0.637 | 0.643 | 0.651 | 0.658 | 0.662 | 0.666 | 0.67  | 0.674 | 0.677 | 0.682 | 0.688 |
| York                         | 0.641 | 0.648 | 0.656 | 0.664 | 0.673 | 0.68  | 0.687 | 0.692 | 0.695 | 0.698 | 0.704 | 0.711 | 0.717 | 0.723 | 0.727 | 0.732 | 0.737 | 0.742 | 0.748 | 0.756 |
| Northern Ireland             | 0.574 | 0.582 | 0.59  | 0.598 | 0.607 | 0.614 | 0.622 | 0.627 | 0.628 | 0.63  | 0.638 | 0.649 | 0.657 | 0.663 | 0.668 | 0.673 | 0.679 | 0.685 | 0.695 | 0.704 |
| Scotland                     | 0.541 | 0.547 | 0.556 | 0.563 | 0.571 | 0.58  | 0.59  | 0.596 | 0.598 | 0.601 | 0.607 | 0.616 | 0.624 | 0.631 | 0.636 | 0.642 | 0.648 | 0.653 | 0.66  | 0.667 |
| Wales                        | 0.503 | 0.51  | 0.519 | 0.529 | 0.54  | 0.549 | 0.557 | 0.563 | 0.566 | 0.569 | 0.576 | 0.586 | 0.593 | 0.6   | 0.605 | 0.61  | 0.615 | 0.62  | 0.627 | 0.635 |
| Latin America and Caribbean  | 0.372 | 0.378 | 0.385 | 0.392 | 0.399 | 0.406 | 0.413 | 0.421 | 0.428 | 0.434 | 0.441 | 0.447 | 0.453 | 0.46  | 0.466 | 0.472 | 0.477 | 0.483 | 0.488 | 0.493 |
| Andean Latin America         | 0.352 | 0.358 | 0.364 | 0.371 | 0.377 | 0.385 | 0.395 | 0.404 | 0.412 | 0.419 | 0.425 | 0.432 | 0.44  | 0.448 | 0.455 | 0.461 | 0.467 | 0.472 | 0.477 | 0.48  |
| Bolivia                      | 0.302 | 0.31  | 0.318 | 0.324 | 0.329 | 0.332 | 0.332 | 0.332 | 0.335 | 0.34  | 0.346 | 0.352 | 0.36  | 0.366 | 0.371 | 0.375 | 0.38  | 0.388 | 0.396 | 0.4   |
| Ecuador                      | 0.384 | 0.387 | 0.39  |       |       |       |       |       |       |       |       |       |       |       |       |       |       |       |       |       |

Appendix Table 10. Socio-demographic Index values for all estimated GBD 2017 locations, 1970–1989

| Location                         | 1970  | 1971  | 1972  | 1973  | 1974  | 1975  | 1976   | 1977  | 1978  | 1979  | 1980  | 1981  | 1982  | 1983  | 1984  | 1985  | 1986  | 1987  | 1988  | 1989  |
|----------------------------------|-------|-------|-------|-------|-------|-------|--------|-------|-------|-------|-------|-------|-------|-------|-------|-------|-------|-------|-------|-------|
| Jamaica                          | 0.406 | 0.416 | 0.429 | 0.442 | 0.453 | 0.465 | 0.476  | 0.486 | 0.493 | 0.498 | 0.502 | 0.508 | 0.513 | 0.519 | 0.524 | 0.531 | 0.537 | 0.54  | 0.542 | 0.543 |
| Puerto Rico                      | 0.564 | 0.572 | 0.579 | 0.586 | 0.593 | 0.596 | 0.597  | 0.6   | 0.61  | 0.62  | 0.628 | 0.637 | 0.648 | 0.657 | 0.664 | 0.668 | 0.672 | 0.675 | 0.677 | 0.68  |
| Saint Lucia                      | 0.333 | 0.342 | 0.352 | 0.362 | 0.373 | 0.383 | 0.395  | 0.406 | 0.417 | 0.426 | 0.432 | 0.436 | 0.44  | 0.445 | 0.451 | 0.461 | 0.471 | 0.482 | 0.491 | 0.5   |
| Saint Vincent and the Grenadines | 0.274 | 0.283 | 0.298 | 0.314 | 0.329 | 0.342 | 0.354  | 0.361 | 0.367 | 0.373 | 0.379 | 0.385 | 0.395 | 0.407 | 0.419 | 0.43  | 0.44  | 0.448 | 0.455 | 0.46  |
| Suriname                         | 0.395 | 0.406 | 0.415 | 0.422 | 0.43  | 0.436 | 0.438  | 0.443 | 0.45  | 0.455 | 0.457 | 0.458 | 0.461 | 0.468 | 0.478 | 0.491 | 0.504 | 0.512 | 0.517 | 0.523 |
| Trinidad and Tobago              | 0.497 | 0.505 | 0.513 | 0.52  | 0.528 | 0.534 | 0.54   | 0.545 | 0.548 | 0.552 | 0.556 | 0.559 | 0.563 | 0.568 | 0.573 | 0.579 | 0.585 | 0.59  | 0.594 | 0.597 |
| Virgin Islands                   | 0.514 | 0.531 | 0.551 | 0.57  | 0.586 | 0.6   | 0.611  | 0.619 | 0.626 | 0.631 | 0.635 | 0.638 | 0.64  | 0.643 | 0.647 | 0.65  | 0.652 | 0.655 | 0.657 | 0.659 |
| Central Latin America            | 0.368 | 0.376 | 0.384 | 0.391 | 0.398 | 0.405 | 0.413  | 0.422 | 0.429 | 0.436 | 0.442 | 0.45  | 0.457 | 0.463 | 0.47  | 0.475 | 0.479 | 0.483 | 0.487 | 0.49  |
| Colombia                         | 0.36  | 0.37  | 0.379 | 0.387 | 0.395 | 0.402 | 0.409  | 0.416 | 0.423 | 0.43  | 0.438 | 0.445 | 0.451 | 0.457 | 0.463 | 0.468 | 0.472 | 0.475 | 0.478 | 0.481 |
| Costa Rica                       | 0.427 | 0.436 | 0.445 | 0.451 | 0.454 | 0.455 | 0.457  | 0.459 | 0.464 | 0.471 | 0.477 | 0.483 | 0.489 | 0.494 | 0.497 | 0.5   | 0.503 | 0.506 | 0.51  | 0.516 |
| El Salvador                      | 0.296 | 0.3   | 0.304 | 0.309 | 0.315 | 0.322 | 0.329  | 0.339 | 0.349 | 0.357 | 0.363 | 0.37  | 0.377 | 0.383 | 0.388 | 0.392 | 0.395 | 0.397 | 0.4   | 0.402 |
| Guatemala                        | 0.273 | 0.273 | 0.277 | 0.284 | 0.289 | 0.284 | 0.271  | 0.265 | 0.265 | 0.264 | 0.263 | 0.266 | 0.274 | 0.282 | 0.287 | 0.293 | 0.303 | 0.303 | 0.302 | 0.308 |
| Honduras                         | 0.24  | 0.244 | 0.248 | 0.252 | 0.255 | 0.258 | 0.262  | 0.266 | 0.272 | 0.278 | 0.286 | 0.296 | 0.305 | 0.311 | 0.315 | 0.319 | 0.322 | 0.326 | 0.33  | 0.336 |
| Mexico                           | 0.372 | 0.379 | 0.387 | 0.396 | 0.404 | 0.413 | 0.424  | 0.435 | 0.443 | 0.449 | 0.456 | 0.463 | 0.47  | 0.477 | 0.483 | 0.489 | 0.494 | 0.499 | 0.504 | 0.509 |
| Aguascalientes                   | 0.402 | 0.412 | 0.422 | 0.432 | 0.442 | 0.453 | 0.464  | 0.475 | 0.484 | 0.491 | 0.498 | 0.506 | 0.513 | 0.519 | 0.526 | 0.532 | 0.538 | 0.543 | 0.549 | 0.554 |
| Baja California                  | 0.417 | 0.427 | 0.436 | 0.447 | 0.457 | 0.467 | 0.48   | 0.492 | 0.5   | 0.507 | 0.514 | 0.523 | 0.531 | 0.538 | 0.545 | 0.551 | 0.557 | 0.561 | 0.564 | 0.567 |
| Baja California Sur              | 0.409 | 0.417 | 0.427 | 0.437 | 0.446 | 0.457 | 0.469  | 0.482 | 0.49  | 0.497 | 0.504 | 0.512 | 0.521 | 0.528 | 0.535 | 0.542 | 0.549 | 0.555 | 0.56  | 0.565 |
| Campeche                         | 0.352 | 0.358 | 0.365 | 0.372 | 0.379 | 0.387 | 0.398  | 0.408 | 0.415 | 0.42  | 0.426 | 0.434 | 0.441 | 0.446 | 0.451 | 0.458 | 0.464 | 0.47  | 0.475 | 0.48  |
| Chiapas                          | 0.302 | 0.309 | 0.315 | 0.321 | 0.327 | 0.334 | 0.344  | 0.352 | 0.358 | 0.362 | 0.367 | 0.372 | 0.377 | 0.38  | 0.384 | 0.388 | 0.391 | 0.394 | 0.397 | 0.4   |
| Chihuahua                        | 0.381 | 0.389 | 0.399 | 0.408 | 0.418 | 0.428 | 0.44   | 0.453 | 0.462 | 0.469 | 0.477 | 0.487 | 0.497 | 0.505 | 0.513 | 0.52  | 0.528 | 0.534 | 0.538 | 0.543 |
| Coahuila                         | 0.401 | 0.409 | 0.417 | 0.425 | 0.432 | 0.44  | 0.451  | 0.462 | 0.468 | 0.473 | 0.479 | 0.487 | 0.494 | 0.501 | 0.509 | 0.517 | 0.524 | 0.531 | 0.538 | 0.544 |
| Colima                           | 0.381 | 0.389 | 0.398 | 0.406 | 0.414 | 0.423 | 0.434  | 0.445 | 0.452 | 0.457 | 0.464 | 0.471 | 0.478 | 0.485 | 0.492 | 0.5   | 0.508 | 0.516 | 0.524 | 0.531 |
| Mexico City                      | 0.446 | 0.456 | 0.468 | 0.48  | 0.492 | 0.504 | 0.518  | 0.532 | 0.542 | 0.551 | 0.56  | 0.569 | 0.576 | 0.579 | 0.581 | 0.581 | 0.58  | 0.581 | 0.585 | 0.593 |
| Durango                          | 0.354 | 0.362 | 0.371 | 0.38  | 0.388 | 0.398 | 0.411  | 0.423 | 0.432 | 0.439 | 0.447 | 0.457 | 0.465 | 0.472 | 0.478 | 0.485 | 0.491 | 0.496 | 0.499 | 0.503 |
| Guanajuato                       | 0.34  | 0.348 | 0.356 | 0.364 | 0.372 | 0.381 | 0.391  | 0.401 | 0.408 | 0.413 | 0.419 | 0.424 | 0.43  | 0.436 | 0.442 | 0.451 | 0.459 | 0.468 | 0.477 | 0.486 |
| Guerrero                         | 0.294 | 0.3   | 0.308 | 0.315 | 0.322 | 0.33  | 0.34   | 0.351 | 0.358 | 0.364 | 0.371 | 0.379 | 0.386 | 0.392 | 0.398 | 0.404 | 0.409 | 0.414 | 0.418 | 0.423 |
| Hidalgo                          | 0.282 | 0.289 | 0.296 | 0.304 | 0.313 | 0.321 | 0.333  | 0.344 | 0.35  | 0.355 | 0.36  | 0.364 | 0.368 | 0.371 | 0.374 | 0.38  | 0.386 | 0.394 | 0.402 | 0.41  |
| Jalisco                          | 0.389 | 0.396 | 0.404 | 0.412 | 0.419 | 0.427 | 0.437  | 0.447 | 0.454 | 0.461 | 0.468 | 0.476 | 0.483 | 0.49  | 0.496 | 0.503 | 0.508 | 0.514 | 0.52  | 0.526 |
| México                           | 0.375 | 0.381 | 0.389 | 0.396 | 0.404 | 0.412 | 0.424  | 0.436 | 0.445 | 0.453 | 0.461 | 0.471 | 0.482 | 0.493 | 0.505 | 0.516 | 0.524 | 0.53  | 0.533 | 0.532 |
| Michoacán de Ocampo              | 0.326 | 0.333 | 0.34  | 0.347 | 0.354 | 0.362 | 0.371  | 0.38  | 0.386 | 0.391 | 0.397 | 0.403 | 0.41  | 0.417 | 0.424 | 0.432 | 0.439 | 0.446 | 0.452 | 0.459 |
| Morelos                          | 0.378 | 0.385 | 0.393 | 0.4   | 0.408 | 0.415 | 0.425  | 0.435 | 0.441 | 0.446 | 0.451 | 0.458 | 0.465 | 0.472 | 0.479 | 0.486 | 0.493 | 0.503 | 0.51  | 0.518 |
| Nayarit                          | 0.337 | 0.346 | 0.354 | 0.363 | 0.372 | 0.382 | 0.394  | 0.406 | 0.414 | 0.421 | 0.429 | 0.438 | 0.446 | 0.453 | 0.459 | 0.466 | 0.472 | 0.478 | 0.484 | 0.49  |
| Nuevo León                       | 0.433 | 0.442 | 0.452 | 0.463 | 0.472 | 0.482 | 0.494  | 0.506 | 0.514 | 0.521 | 0.528 | 0.536 | 0.545 | 0.554 | 0.564 | 0.572 | 0.579 | 0.585 | 0.59  | 0.594 |
| Oaxaca                           | 0.292 | 0.299 | 0.305 | 0.312 | 0.318 | 0.326 | 0.335  | 0.345 | 0.352 | 0.357 | 0.364 | 0.372 | 0.38  | 0.387 | 0.393 | 0.4   | 0.407 | 0.413 | 0.419 | 0.425 |
| Puebla                           | 0.314 | 0.322 | 0.33  | 0.338 | 0.346 | 0.355 | 0.368  | 0.38  | 0.387 | 0.392 | 0.398 | 0.403 | 0.408 | 0.416 | 0.422 | 0.425 | 0.426 | 0.432 | 0.441 | 0.449 |
| Querétaro                        | 0.361 | 0.369 | 0.377 | 0.386 | 0.395 | 0.405 | 0.417  | 0.428 | 0.436 | 0.443 | 0.449 | 0.455 | 0.458 | 0.46  | 0.462 | 0.462 | 0.464 | 0.47  | 0.478 | 0.489 |
| Quintana Roo                     | 0.4   | 0.405 | 0.411 | 0.417 | 0.422 | 0.428 | 0.439  | 0.449 | 0.454 | 0.458 | 0.463 | 0.47  | 0.477 | 0.483 | 0.488 | 0.495 | 0.501 | 0.506 | 0.51  | 0.515 |
| San Luis Potosí                  | 0.336 | 0.344 | 0.351 | 0.359 | 0.366 | 0.375 | 0.386  | 0.396 | 0.404 | 0.41  | 0.418 | 0.426 | 0.434 | 0.44  | 0.447 | 0.454 | 0.46  | 0.465 | 0.471 | 0.477 |
| Sinaloa                          | 0.362 | 0.371 | 0.379 | 0.388 | 0.397 | 0.407 | 0.42   | 0.432 | 0.44  | 0.448 | 0.456 | 0.465 | 0.474 | 0.481 | 0.488 | 0.495 | 0.501 | 0.507 | 0.512 | 0.518 |
| Sonora                           | 0.395 | 0.403 | 0.413 | 0.423 | 0.432 | 0.442 | 0.454  | 0.465 | 0.473 | 0.48  | 0.488 | 0.495 | 0.503 | 0.512 | 0.52  | 0.527 | 0.533 | 0.538 | 0.543 | 0.549 |
| Tabasco                          | 0.323 | 0.33  | 0.338 | 0.345 | 0.352 | 0.361 | 0.373  | 0.384 | 0.392 | 0.398 | 0.405 | 0.413 | 0.422 | 0.428 | 0.435 | 0.442 | 0.449 | 0.456 | 0.462 | 0.468 |
| Tamaulipas                       | 0.401 | 0.41  | 0.419 | 0.428 | 0.436 | 0.445 | 0.456  | 0.467 | 0.473 | 0.478 | 0.483 | 0.49  | 0.497 | 0.504 | 0.511 | 0.519 | 0.525 | 0.532 | 0.538 | 0.544 |
| Tlaxcala                         | 0.328 | 0.335 | 0.343 | 0.351 | 0.358 | 0.367 | 0.378  | 0.389 | 0.395 | 0.399 | 0.403 | 0.407 | 0.412 | 0.415 | 0.419 | 0.427 | 0.437 | 0.449 | 0.46  | 0.47  |
| Veracruz de Ignacio de la Llave  | 0.329 | 0.336 | 0.343 | 0.35  | 0.357 | 0.365 | 0.375  | 0.385 | 0.393 | 0.399 | 0.406 | 0.414 | 0.422 | 0.429 | 0.435 | 0.441 | 0.447 | 0.451 | 0.455 | 0.459 |
| Yucatán                          | 0.363 | 0.368 | 0.375 | 0.383 | 0.39  | 0.398 | 0.408  | 0.417 | 0.425 | 0.431 | 0.438 | 0.445 | 0.452 | 0.458 | 0.463 | 0.469 | 0.474 | 0.48  | 0.485 | 0.491 |
| Zacatecas                        | 0.32  | 0.328 | 0.337 | 0.344 | 0.352 | 0.362 | 0.373  | 0.384 | 0.392 | 0.399 | 0.407 | 0.416 | 0.425 | 0.432 | 0.439 | 0.447 | 0.455 | 0.462 | 0.469 | 0.476 |
| Nicaragua                        | 0.264 | 0.27  | 0.274 | 0.277 | 0.279 | 0.282 | 0.285  | 0.287 | 0.29  | 0.292 | 0.297 | 0.303 | 0.309 | 0.316 | 0.323 | 0.33  | 0.337 | 0.343 | 0.348 | 0.352 |
| Panama                           | 0.401 | 0.411 | 0.421 | 0.431 | 0.442 | 0.452 | 0.459  | 0.465 | 0.472 | 0.479 | 0.486 | 0.493 | 0.499 | 0.506 | 0.513 | 0.519 | 0.524 | 0.529 | 0.533 | 0.537 |
| Venezuela                        | 0.432 | 0.441 | 0.45  | 0.453 | 0.456 | 0.461 | 0.468  | 0.477 | 0.483 | 0.489 | 0.496 | 0.503 | 0.51  | 0.519 | 0.528 | 0.529 | 0.528 | 0.53  | 0.535 | 0.533 |
| Tropical Latin America           | 0.361 | 0.367 | 0.373 | 0.38  | 0.387 | 0.393 | 0.4    | 0.407 | 0.413 | 0.42  | 0.426 | 0.432 | 0.438 | 0.444 | 0.45  | 0.457 | 0.465 | 0.472 | 0.48  | 0.487 |
| Brazil                           | 0.361 | 0.367 | 0.373 | 0.38  | 0.387 | 0.393 | 0.4    | 0.407 | 0.413 | 0.42  | 0.427 | 0.433 | 0.439 | 0.444 | 0.451 | 0.457 | 0.465 | 0.472 | 0.48  | 0.487 |
| Acre                             | 0.247 | 0.252 | 0.256 | 0.261 | 0.265 | 0.27  | 0.274  | 0.279 | 0.283 | 0.289 | 0.294 | 0.3   | 0.305 | 0.311 | 0.319 | 0.327 | 0.336 | 0.347 | 0.357 | 0.367 |
| Alagoas                          | 0.213 | 0.216 | 0.221 | 0.227 | 0.232 | 0.238 | 0.243  | 0.249 | 0.255 | 0.262 | 0.269 | 0.276 | 0.283 | 0.291 | 0.3   | 0.309 | 0.319 | 0.329 | 0.338 | 0.347 |
| Amapá                            | 0.322 | 0.327 | 0.332 | 0.338 | 0.343 | 0.349 | 0.356  | 0.362 | 0.369 | 0.377 | 0.384 | 0.392 | 0.399 | 0.406 | 0.414 | 0.422 | 0.431 | 0.44  | 0.45  | 0.459 |
| Amazonas                         | 0.272 | 0.277 | 0.282 | 0.288 | 0.293 | 0.298 | 0.303  | 0.308 | 0.315 | 0.323 | 0.33  | 0.339 | 0.348 | 0.358 | 0.369 | 0.381 | 0.393 | 0.405 | 0.416 | 0.427 |
| Bahia                            | 0.26  | 0.265 | 0.269 | 0.274 | 0.279 | 0.283 | 0.287  | 0.292 | 0.297 | 0.303 | 0.31  | 0.317 | 0.325 | 0.333 | 0.342 | 0.352 | 0.362 | 0.373 | 0.383 | 0.393 |
| Ceará                            | 0.278 | 0.284 | 0.289 | 0.294 | 0.299 | 0.304 | 0.308  | 0.313 | 0.319 | 0.325 | 0.332 | 0.339 | 0.347 | 0.354 | 0.362 | 0.37  | 0.379 | 0.388 | 0.396 | 0.404 |
| Distrito Federal                 | 0.498 | 0.506 | 0.513 | 0.52  | 0.526 | 0.533 | 0.54</ |       |       |       |       |       |       |       |       |       |       |       |       |       |

**Appendix Table 10. Socio-demographic Index values for all estimated GBD 2017 locations, 1970–1989**

| Location                     | 1970  | 1971  | 1972  | 1973  | 1974  | 1975  | 1976  | 1977  | 1978  | 1979  | 1980  | 1981  | 1982  | 1983  | 1984  | 1985  | 1986  | 1987  | 1988  | 1989  |
|------------------------------|-------|-------|-------|-------|-------|-------|-------|-------|-------|-------|-------|-------|-------|-------|-------|-------|-------|-------|-------|-------|
| Rio Grande do Sul            | 0.426 | 0.433 | 0.44  | 0.447 | 0.454 | 0.46  | 0.466 | 0.472 | 0.477 | 0.483 | 0.488 | 0.493 | 0.498 | 0.502 | 0.507 | 0.513 | 0.519 | 0.526 | 0.532 | 0.538 |
| Rondônia                     | 0.283 | 0.288 | 0.294 | 0.3   | 0.305 | 0.31  | 0.315 | 0.32  | 0.326 | 0.331 | 0.337 | 0.343 | 0.35  | 0.357 | 0.365 | 0.374 | 0.384 | 0.394 | 0.404 | 0.414 |
| Roraima                      | 0.294 | 0.299 | 0.303 | 0.307 | 0.312 | 0.316 | 0.32  | 0.324 | 0.328 | 0.333 | 0.338 | 0.343 | 0.349 | 0.356 | 0.364 | 0.374 | 0.384 | 0.395 | 0.407 | 0.417 |
| Santa Catarina               | 0.403 | 0.409 | 0.415 | 0.422 | 0.429 | 0.435 | 0.443 | 0.45  | 0.458 | 0.466 | 0.473 | 0.481 | 0.488 | 0.494 | 0.5   | 0.507 | 0.514 | 0.521 | 0.528 | 0.535 |
| São Paulo                    | 0.435 | 0.441 | 0.447 | 0.453 | 0.459 | 0.465 | 0.471 | 0.477 | 0.482 | 0.488 | 0.494 | 0.5   | 0.505 | 0.51  | 0.516 | 0.522 | 0.529 | 0.537 | 0.544 | 0.551 |
| Sergipe                      | 0.274 | 0.28  | 0.286 | 0.293 | 0.3   | 0.307 | 0.314 | 0.321 | 0.328 | 0.336 | 0.343 | 0.351 | 0.358 | 0.365 | 0.373 | 0.381 | 0.39  | 0.399 | 0.408 | 0.417 |
| Tocantins                    | 0.242 | 0.246 | 0.25  | 0.254 | 0.259 | 0.265 | 0.272 | 0.279 | 0.287 | 0.295 | 0.304 | 0.313 | 0.322 | 0.33  | 0.34  | 0.349 | 0.36  | 0.37  | 0.379 | 0.388 |
| Paraguay                     | 0.352 | 0.357 | 0.362 | 0.367 | 0.373 | 0.378 | 0.383 | 0.388 | 0.393 | 0.398 | 0.404 | 0.41  | 0.416 | 0.421 | 0.427 | 0.433 | 0.44  | 0.449 | 0.457 | 0.463 |
| North Africa and Middle East | 0.297 | 0.304 | 0.312 | 0.32  | 0.328 | 0.335 | 0.342 | 0.35  | 0.357 | 0.364 | 0.373 | 0.382 | 0.39  | 0.399 | 0.408 | 0.415 | 0.422 | 0.431 | 0.439 | 0.448 |
| North Africa and Middle East | 0.297 | 0.304 | 0.312 | 0.32  | 0.328 | 0.335 | 0.342 | 0.35  | 0.357 | 0.364 | 0.373 | 0.382 | 0.39  | 0.399 | 0.408 | 0.415 | 0.422 | 0.431 | 0.439 | 0.448 |
| Afghanistan                  | 0.113 | 0.115 | 0.116 | 0.118 | 0.119 | 0.121 | 0.123 | 0.125 | 0.127 | 0.129 | 0.13  | 0.13  | 0.132 | 0.135 | 0.138 | 0.14  | 0.143 | 0.145 | 0.147 | 0.148 |
| Algeria                      | 0.304 | 0.31  | 0.317 | 0.324 | 0.332 | 0.34  | 0.348 | 0.356 | 0.365 | 0.375 | 0.387 | 0.399 | 0.41  | 0.422 | 0.435 | 0.448 | 0.459 | 0.468 | 0.477 | 0.487 |
| Bahrain                      | 0.414 | 0.427 | 0.44  | 0.454 | 0.467 | 0.477 | 0.489 | 0.501 | 0.515 | 0.521 | 0.531 | 0.541 | 0.552 | 0.564 | 0.575 | 0.583 | 0.591 | 0.596 | 0.602 | 0.607 |
| Egypt                        | 0.282 | 0.29  | 0.297 | 0.303 | 0.308 | 0.313 | 0.32  | 0.327 | 0.334 | 0.342 | 0.351 | 0.359 | 0.367 | 0.374 | 0.381 | 0.389 | 0.399 | 0.41  | 0.422 | 0.432 |
| Iran                         | 0.319 | 0.329 | 0.339 | 0.348 | 0.357 | 0.363 | 0.37  | 0.376 | 0.379 | 0.382 | 0.384 | 0.388 | 0.401 | 0.423 | 0.443 | 0.453 | 0.459 | 0.468 | 0.48  | 0.493 |
| Iraq                         | 0.274 | 0.281 | 0.287 | 0.294 | 0.302 | 0.311 | 0.32  | 0.33  | 0.34  | 0.35  | 0.361 | 0.37  | 0.379 | 0.386 | 0.393 | 0.399 | 0.406 | 0.413 | 0.42  | 0.427 |
| Jordan                       | 0.302 | 0.316 | 0.329 | 0.343 | 0.357 | 0.371 | 0.385 | 0.399 | 0.414 | 0.429 | 0.446 | 0.463 | 0.477 | 0.49  | 0.503 | 0.515 | 0.526 | 0.535 | 0.542 | 0.547 |
| Kuwait                       | 0.41  | 0.423 | 0.424 | 0.423 | 0.427 | 0.436 | 0.452 | 0.472 | 0.49  | 0.504 | 0.517 | 0.531 | 0.546 | 0.562 | 0.579 | 0.593 | 0.603 | 0.618 | 0.634 | 0.649 |
| Lebanon                      | 0.295 | 0.307 | 0.32  | 0.332 | 0.351 | 0.363 | 0.372 | 0.383 | 0.383 | 0.395 | 0.407 | 0.419 | 0.429 | 0.439 | 0.452 | 0.466 | 0.48  | 0.494 | 0.505 | 0.512 |
| Libya                        | 0.318 | 0.31  | 0.308 | 0.326 | 0.357 | 0.39  | 0.423 | 0.456 | 0.489 | 0.519 | 0.545 | 0.563 | 0.58  | 0.594 | 0.604 | 0.611 | 0.616 | 0.622 | 0.628 | 0.636 |
| Morocco                      | 0.223 | 0.231 | 0.238 | 0.246 | 0.254 | 0.262 | 0.27  | 0.279 | 0.287 | 0.296 | 0.304 | 0.312 | 0.321 | 0.329 | 0.338 | 0.346 | 0.355 | 0.364 | 0.373 | 0.381 |
| Palestine                    | 0.223 | 0.231 | 0.24  | 0.248 | 0.257 | 0.266 | 0.276 | 0.285 | 0.295 | 0.304 | 0.312 | 0.32  | 0.326 | 0.332 | 0.338 | 0.343 | 0.348 | 0.352 | 0.355 | 0.358 |
| Oman                         | 0.27  | 0.28  | 0.289 | 0.297 | 0.305 | 0.314 | 0.323 | 0.332 | 0.34  | 0.349 | 0.358 | 0.367 | 0.378 | 0.39  | 0.403 | 0.416 | 0.428 | 0.439 | 0.45  | 0.462 |
| Qatar                        | 0.43  | 0.441 | 0.451 | 0.462 | 0.473 | 0.484 | 0.495 | 0.506 | 0.517 | 0.527 | 0.534 | 0.54  | 0.545 | 0.548 | 0.551 | 0.556 | 0.563 | 0.571 | 0.58  | 0.591 |
| Saudi Arabia                 | 0.226 | 0.232 | 0.238 | 0.245 | 0.251 | 0.257 | 0.261 | 0.266 | 0.271 | 0.276 | 0.28  | 0.285 | 0.292 | 0.303 | 0.318 | 0.334 | 0.352 | 0.371 | 0.393 | 0.415 |
| Sudan                        | 0.133 | 0.135 | 0.138 | 0.141 | 0.145 | 0.149 | 0.154 | 0.16  | 0.165 | 0.17  | 0.174 | 0.179 | 0.184 | 0.188 | 0.192 | 0.197 | 0.201 | 0.205 | 0.21  | 0.215 |
| Syria                        | 0.247 | 0.248 | 0.251 | 0.254 | 0.257 | 0.262 | 0.269 | 0.278 | 0.288 | 0.298 | 0.307 | 0.317 | 0.327 | 0.337 | 0.344 | 0.352 | 0.359 | 0.368 | 0.376 | 0.383 |
| Tunisia                      | 0.26  | 0.268 | 0.277 | 0.285 | 0.293 | 0.302 | 0.311 | 0.321 | 0.332 | 0.342 | 0.352 | 0.361 | 0.369 | 0.379 | 0.391 | 0.403 | 0.413 | 0.423 | 0.433 | 0.443 |
| Turkey                       | 0.349 | 0.355 | 0.362 | 0.369 | 0.377 | 0.385 | 0.393 | 0.402 | 0.411 | 0.419 | 0.426 | 0.434 | 0.441 | 0.448 | 0.455 | 0.462 | 0.47  | 0.479 | 0.489 | 0.498 |
| United Arab Emirates         | 0.333 | 0.332 | 0.338 | 0.354 | 0.375 | 0.396 | 0.412 | 0.427 | 0.445 | 0.462 | 0.475 | 0.484 | 0.497 | 0.516 | 0.535 | 0.549 | 0.561 | 0.574 | 0.589 | 0.605 |
| Yemen                        | 0.12  | 0.124 | 0.128 | 0.132 | 0.136 | 0.139 | 0.142 | 0.146 | 0.149 | 0.154 | 0.158 | 0.162 | 0.167 | 0.174 | 0.181 | 0.187 | 0.191 | 0.194 | 0.197 | 0.199 |
| South Asia                   | 0.219 | 0.223 | 0.227 | 0.232 | 0.238 | 0.244 | 0.249 | 0.254 | 0.259 | 0.264 | 0.267 | 0.269 | 0.272 | 0.277 | 0.281 | 0.286 | 0.292 | 0.298 | 0.303 | 0.308 |
| South Asia                   | 0.219 | 0.223 | 0.227 | 0.232 | 0.238 | 0.244 | 0.249 | 0.254 | 0.259 | 0.264 | 0.267 | 0.269 | 0.272 | 0.277 | 0.281 | 0.286 | 0.292 | 0.298 | 0.303 | 0.308 |
| Bangladesh                   | 0.084 | 0.116 | 0.138 | 0.153 | 0.166 | 0.177 | 0.187 | 0.195 | 0.202 | 0.207 | 0.211 | 0.215 | 0.219 | 0.222 | 0.225 | 0.228 | 0.231 | 0.236 | 0.241 | 0.248 |
| Bhutan                       | 0.202 | 0.208 | 0.212 | 0.217 | 0.221 | 0.225 | 0.229 | 0.234 | 0.238 | 0.243 | 0.248 | 0.254 | 0.26  | 0.267 | 0.274 | 0.281 | 0.289 | 0.297 | 0.306 | 0.315 |
| India                        | 0.225 | 0.23  | 0.233 | 0.238 | 0.245 | 0.251 | 0.255 | 0.26  | 0.265 | 0.27  | 0.273 | 0.275 | 0.278 | 0.283 | 0.287 | 0.293 | 0.299 | 0.306 | 0.311 | 0.316 |
| Andhra Pradesh               | 0.162 | 0.166 | 0.169 | 0.174 | 0.183 | 0.191 | 0.195 | 0.198 | 0.203 | 0.208 | 0.213 | 0.219 | 0.225 | 0.233 | 0.24  | 0.248 | 0.255 | 0.262 | 0.268 | 0.274 |
| Arunachal Pradesh            | 0.185 | 0.19  | 0.196 | 0.202 | 0.209 | 0.214 | 0.216 | 0.221 | 0.228 | 0.234 | 0.236 | 0.24  | 0.247 | 0.254 | 0.261 | 0.269 | 0.279 | 0.288 | 0.298 | 0.305 |
| Assam                        | 0.223 | 0.228 | 0.231 | 0.235 | 0.241 | 0.245 | 0.248 | 0.25  | 0.255 | 0.259 | 0.261 | 0.264 | 0.269 | 0.276 | 0.283 | 0.289 | 0.296 | 0.306 | 0.314 | 0.321 |
| Bihar                        | 0.197 | 0.201 | 0.205 | 0.21  | 0.215 | 0.221 | 0.226 | 0.231 | 0.237 | 0.242 | 0.244 | 0.245 | 0.248 | 0.252 | 0.258 | 0.264 | 0.271 | 0.277 | 0.282 | 0.287 |
| Chhattisgarh                 | 0.202 | 0.207 | 0.211 | 0.216 | 0.224 | 0.232 | 0.238 | 0.243 | 0.249 | 0.254 | 0.258 | 0.261 | 0.264 | 0.268 | 0.272 | 0.276 | 0.282 | 0.286 | 0.288 | 0.29  |
| Delhi                        | 0.391 | 0.397 | 0.407 | 0.416 | 0.424 | 0.431 | 0.437 | 0.442 | 0.447 | 0.45  | 0.45  | 0.449 | 0.453 | 0.456 | 0.459 | 0.462 | 0.466 | 0.472 | 0.478 | 0.483 |
| Goa                          | 0.366 | 0.373 | 0.38  | 0.387 | 0.394 | 0.402 | 0.41  | 0.417 | 0.425 | 0.431 | 0.436 | 0.44  | 0.447 | 0.452 | 0.459 | 0.464 | 0.471 | 0.478 | 0.486 | 0.493 |
| Gujarat                      | 0.244 | 0.249 | 0.255 | 0.262 | 0.268 | 0.272 | 0.276 | 0.283 | 0.29  | 0.296 | 0.297 | 0.297 | 0.3   | 0.304 | 0.305 | 0.307 | 0.315 | 0.326 | 0.338 | 0.345 |
| Haryana                      | 0.243 | 0.248 | 0.253 | 0.26  | 0.269 | 0.277 | 0.283 | 0.288 | 0.293 | 0.297 | 0.299 | 0.299 | 0.302 | 0.305 | 0.307 | 0.311 | 0.316 | 0.323 | 0.332 | 0.337 |
| Himachal Pradesh             | 0.213 | 0.218 | 0.224 | 0.23  | 0.238 | 0.245 | 0.251 | 0.259 | 0.267 | 0.275 | 0.279 | 0.283 | 0.287 | 0.291 | 0.296 | 0.302 | 0.31  | 0.317 | 0.326 | 0.333 |
| Jammu and Kashmir            | 0.234 | 0.239 | 0.245 | 0.251 | 0.258 | 0.265 | 0.272 | 0.279 | 0.284 | 0.289 | 0.294 | 0.297 | 0.301 | 0.304 | 0.307 | 0.313 | 0.319 | 0.324 | 0.329 | 0.332 |
| Jharkhand                    | 0.205 | 0.21  | 0.213 | 0.219 | 0.226 | 0.233 | 0.238 | 0.243 | 0.249 | 0.253 | 0.256 | 0.258 | 0.26  | 0.262 | 0.265 | 0.269 | 0.272 | 0.275 | 0.278 | 0.279 |
| Karnataka                    | 0.22  | 0.223 | 0.226 | 0.231 | 0.237 | 0.242 | 0.245 | 0.249 | 0.253 | 0.257 | 0.259 | 0.261 | 0.266 | 0.271 | 0.277 | 0.283 | 0.291 | 0.3   | 0.309 | 0.316 |
| Kerala                       | 0.318 | 0.323 | 0.328 | 0.332 | 0.337 | 0.344 | 0.349 | 0.354 | 0.357 | 0.36  | 0.363 | 0.364 | 0.366 | 0.369 | 0.373 | 0.378 | 0.385 | 0.391 | 0.397 | 0.402 |
| Madhya Pradesh               | 0.175 | 0.178 | 0.18  | 0.185 | 0.192 | 0.198 | 0.202 | 0.207 | 0.214 | 0.22  | 0.224 | 0.226 | 0.232 | 0.239 | 0.246 | 0.254 | 0.261 | 0.269 | 0.275 | 0.279 |
| Maharashtra                  | 0.258 | 0.262 | 0.266 | 0.272 | 0.279 | 0.284 | 0.288 | 0.292 | 0.298 | 0.303 | 0.305 | 0.306 | 0.309 | 0.314 | 0.318 | 0.323 | 0.33  | 0.34  | 0.349 | 0.357 |
| Manipur                      | 0.251 | 0.257 | 0.261 | 0.267 | 0.274 | 0.282 | 0.288 | 0.294 | 0.3   | 0.306 | 0.311 | 0.316 | 0.321 | 0.328 | 0.334 | 0.341 | 0.348 | 0.358 | 0.367 | 0.374 |
| Meghalaya                    | 0.229 | 0.234 | 0.239 | 0.244 | 0.25  | 0.256 | 0.259 | 0.263 | 0.268 | 0.272 | 0.276 | 0.279 | 0.283 | 0.288 | 0.293 | 0.299 | 0.304 | 0.314 | 0.32  | 0.327 |
| Mizoram                      | 0.27  | 0.275 | 0.28  | 0.284 | 0.29  | 0.297 | 0.303 | 0.307 | 0.313 | 0.318 | 0.322 | 0.325 | 0.329 | 0.333 | 0.34  | 0.351 | 0.363 | 0.376 | 0.384 | 0.389 |
| Nagaland                     | 0.283 | 0.287 | 0.291 | 0.295 | 0.301 | 0.307 | 0.312 | 0.316 | 0.321 | 0.325 | 0.329 | 0.333 | 0.339 | 0.345 | 0.351 | 0.358 | 0.366 | 0.375 | 0.383 | 0.39  |
| Odisha                       | 0.19  | 0.194 | 0.197 | 0.201 | 0.207 | 0.214 | 0.218 | 0.223 | 0.227 | 0.232 | 0.236 | 0.239 | 0.242 | 0.247 | 0.251 | 0.258 | 0.266 | 0.27  | 0.276 | 0.28  |
| Punjab                       | 0.294 | 0.299 | 0.303 | 0.308 | 0.313 | 0.318 |       |       |       |       |       |       |       |       |       |       |       |       |       |       |

Appendix Table 10. Socio-demographic Index values for all estimated GBD 2017 locations, 1970–1989

| Location                       | 1970  | 1971  | 1972  | 1973  | 1974  | 1975  | 1976  | 1977  | 1978  | 1979  | 1980  | 1981  | 1982  | 1983  | 1984  | 1985  | 1986  | 1987  | 1988  | 1989  |
|--------------------------------|-------|-------|-------|-------|-------|-------|-------|-------|-------|-------|-------|-------|-------|-------|-------|-------|-------|-------|-------|-------|
| China                          | 0.269 | 0.28  | 0.292 | 0.305 | 0.318 | 0.33  | 0.339 | 0.347 | 0.355 | 0.362 | 0.37  | 0.377 | 0.38  | 0.383 | 0.389 | 0.396 | 0.404 | 0.417 | 0.431 | 0.443 |
| North Korea                    | 0.398 | 0.411 | 0.421 | 0.431 | 0.44  | 0.448 | 0.453 | 0.458 | 0.462 | 0.466 | 0.47  | 0.474 | 0.478 | 0.482 | 0.486 | 0.49  | 0.494 | 0.498 | 0.503 | 0.507 |
| Taiwan (Province of China)     | 0.485 | 0.497 | 0.51  | 0.52  | 0.53  | 0.53  | 0.535 | 0.548 | 0.555 | 0.566 | 0.577 | 0.588 | 0.601 | 0.613 | 0.627 | 0.643 | 0.655 | 0.663 | 0.672 | 0.682 |
| Oceania                        | 0.329 | 0.333 | 0.338 | 0.343 | 0.349 | 0.353 | 0.358 | 0.362 | 0.366 | 0.37  | 0.374 | 0.377 | 0.38  | 0.384 | 0.387 | 0.39  | 0.393 | 0.397 | 0.4   | 0.403 |
| American Samoa                 | 0.537 | 0.546 | 0.557 | 0.567 | 0.575 | 0.58  | 0.586 | 0.59  | 0.595 | 0.599 | 0.6   | 0.6   | 0.599 | 0.597 | 0.597 | 0.597 | 0.599 | 0.601 | 0.604 | 0.607 |
| Federated States of Micronesia | 0.325 | 0.331 | 0.337 | 0.344 | 0.351 | 0.358 | 0.365 | 0.373 | 0.38  | 0.387 | 0.395 | 0.402 | 0.408 | 0.415 | 0.422 | 0.429 | 0.436 | 0.443 | 0.449 | 0.456 |
| Fiji                           | 0.416 | 0.424 | 0.433 | 0.444 | 0.454 | 0.463 | 0.471 | 0.477 | 0.483 | 0.488 | 0.491 | 0.495 | 0.499 | 0.503 | 0.507 | 0.511 | 0.516 | 0.52  | 0.525 | 0.529 |
| Guam                           | 0.589 | 0.586 | 0.592 | 0.609 | 0.631 | 0.651 | 0.669 | 0.684 | 0.695 | 0.703 | 0.707 | 0.708 | 0.709 | 0.71  | 0.71  | 0.71  | 0.71  | 0.708 | 0.706 | 0.702 |
| Kiribati                       | 0.31  | 0.314 | 0.318 | 0.323 | 0.332 | 0.34  | 0.345 | 0.348 | 0.352 | 0.354 | 0.354 | 0.354 | 0.353 | 0.352 | 0.352 | 0.351 | 0.351 | 0.351 | 0.352 | 0.354 |
| Marshall Islands               | 0.269 | 0.271 | 0.273 | 0.279 | 0.287 | 0.296 | 0.303 | 0.31  | 0.318 | 0.328 | 0.337 | 0.345 | 0.35  | 0.355 | 0.361 | 0.366 | 0.375 | 0.384 | 0.394 | 0.403 |
| Northern Mariana Islands       | 0.585 | 0.591 | 0.598 | 0.605 | 0.613 | 0.622 | 0.63  | 0.639 | 0.648 | 0.656 | 0.664 | 0.671 | 0.678 | 0.686 | 0.695 | 0.704 | 0.713 | 0.721 | 0.728 | 0.734 |
| Papua New Guinea               | 0.255 | 0.259 | 0.264 | 0.268 | 0.272 | 0.276 | 0.279 | 0.282 | 0.285 | 0.288 | 0.29  | 0.293 | 0.295 | 0.298 | 0.3   | 0.303 | 0.306 | 0.309 | 0.312 | 0.315 |
| Samoa                          | 0.411 | 0.422 | 0.431 | 0.442 | 0.451 | 0.458 | 0.467 | 0.475 | 0.483 | 0.492 | 0.499 | 0.503 | 0.507 | 0.51  | 0.514 | 0.518 | 0.522 | 0.527 | 0.531 | 0.535 |
| Solomon Islands                | 0.241 | 0.244 | 0.247 | 0.25  | 0.254 | 0.258 | 0.262 | 0.266 | 0.271 | 0.277 | 0.282 | 0.286 | 0.29  | 0.294 | 0.297 | 0.3   | 0.303 | 0.306 | 0.309 | 0.312 |
| Tonga                          | 0.376 | 0.38  | 0.384 | 0.388 | 0.392 | 0.397 | 0.402 | 0.408 | 0.414 | 0.42  | 0.428 | 0.436 | 0.446 | 0.455 | 0.469 | 0.481 | 0.492 | 0.502 | 0.51  | 0.517 |
| Vanuatu                        | 0.292 | 0.296 | 0.3   | 0.305 | 0.313 | 0.32  | 0.326 | 0.331 | 0.337 | 0.342 | 0.346 | 0.35  | 0.353 | 0.357 | 0.361 | 0.365 | 0.369 | 0.372 | 0.374 | 0.377 |
| Southeast Asia                 | 0.316 | 0.323 | 0.329 | 0.336 | 0.343 | 0.351 | 0.359 | 0.367 | 0.374 | 0.382 | 0.39  | 0.398 | 0.406 | 0.414 | 0.422 | 0.43  | 0.437 | 0.444 | 0.451 | 0.459 |
| Cambodia                       | 0.211 | 0.213 | 0.214 | 0.214 | 0.214 | 0.214 | 0.214 | 0.213 | 0.212 | 0.212 | 0.213 | 0.216 | 0.218 | 0.222 | 0.226 | 0.23  | 0.235 | 0.24  | 0.246 | 0.253 |
| Indonesia                      | 0.28  | 0.287 | 0.294 | 0.303 | 0.312 | 0.321 | 0.33  | 0.339 | 0.347 | 0.357 | 0.366 | 0.376 | 0.385 | 0.395 | 0.405 | 0.414 | 0.424 | 0.433 | 0.443 | 0.454 |
| Laos                           | 0.201 | 0.204 | 0.207 | 0.211 | 0.215 | 0.219 | 0.223 | 0.227 | 0.231 | 0.235 | 0.24  | 0.246 | 0.253 | 0.259 | 0.266 | 0.273 | 0.28  | 0.287 | 0.293 | 0.3   |
| Malaysia                       | 0.412 | 0.421 | 0.427 | 0.43  | 0.439 | 0.453 | 0.468 | 0.48  | 0.489 | 0.496 | 0.503 | 0.51  | 0.52  | 0.527 | 0.535 | 0.543 | 0.548 | 0.551 | 0.559 | 0.565 |
| Maldives                       | 0.237 | 0.241 | 0.245 | 0.249 | 0.254 | 0.259 | 0.264 | 0.269 | 0.273 | 0.278 | 0.285 | 0.292 | 0.3   | 0.306 | 0.314 | 0.325 | 0.337 | 0.349 | 0.361 | 0.373 |
| Mauritius                      | 0.391 | 0.401 | 0.41  | 0.416 | 0.42  | 0.426 | 0.436 | 0.446 | 0.456 | 0.467 | 0.481 | 0.495 | 0.507 | 0.517 | 0.525 | 0.532 | 0.538 | 0.542 | 0.544 | 0.547 |
| Myanmar                        | 0.195 | 0.206 | 0.215 | 0.223 | 0.23  | 0.238 | 0.245 | 0.251 | 0.258 | 0.264 | 0.271 | 0.277 | 0.284 | 0.292 | 0.3   | 0.307 | 0.314 | 0.319 | 0.323 | 0.326 |
| Philippines                    | 0.417 | 0.421 | 0.425 | 0.43  | 0.433 | 0.437 | 0.442 | 0.449 | 0.455 | 0.463 | 0.47  | 0.477 | 0.484 | 0.49  | 0.494 | 0.497 | 0.498 | 0.5   | 0.502 | 0.505 |
| Sri Lanka                      | 0.385 | 0.393 | 0.399 | 0.401 | 0.405 | 0.41  | 0.415 | 0.418 | 0.422 | 0.425 | 0.429 | 0.433 | 0.439 | 0.444 | 0.45  | 0.456 | 0.462 | 0.469 | 0.477 | 0.484 |
| Seychelles                     | 0.358 | 0.365 | 0.372 | 0.38  | 0.389 | 0.399 | 0.409 | 0.42  | 0.432 | 0.445 | 0.457 | 0.469 | 0.479 | 0.488 | 0.497 | 0.507 | 0.516 | 0.524 | 0.533 | 0.541 |
| Thailand                       | 0.346 | 0.355 | 0.363 | 0.371 | 0.379 | 0.387 | 0.395 | 0.403 | 0.409 | 0.413 | 0.42  | 0.429 | 0.437 | 0.444 | 0.454 | 0.464 | 0.473 | 0.48  | 0.485 | 0.492 |
| Timor-Leste                    | 0.167 | 0.174 | 0.18  | 0.186 | 0.193 | 0.199 | 0.206 | 0.212 | 0.218 | 0.225 | 0.23  | 0.234 | 0.239 | 0.243 | 0.247 | 0.252 | 0.258 | 0.263 | 0.267 | 0.272 |
| Vietnam                        | 0.284 | 0.288 | 0.292 | 0.297 | 0.301 | 0.306 | 0.312 | 0.319 | 0.326 | 0.333 | 0.339 | 0.347 | 0.354 | 0.361 | 0.369 | 0.375 | 0.382 | 0.388 | 0.394 | 0.4   |
| Sub-Saharan Africa             | 0.212 | 0.216 | 0.22  | 0.225 | 0.23  | 0.235 | 0.24  | 0.245 | 0.25  | 0.255 | 0.26  | 0.265 | 0.27  | 0.275 | 0.28  | 0.284 | 0.288 | 0.292 | 0.296 | 0.3   |
| Central sub-Saharan Africa     | 0.182 | 0.187 | 0.192 | 0.198 | 0.204 | 0.209 | 0.215 | 0.221 | 0.226 | 0.232 | 0.238 | 0.244 | 0.25  | 0.256 | 0.262 | 0.269 | 0.275 | 0.281 | 0.287 | 0.293 |
| Angola                         | 0.127 | 0.132 | 0.137 | 0.142 | 0.148 | 0.154 | 0.16  | 0.166 | 0.172 | 0.178 | 0.184 | 0.19  | 0.196 | 0.2   | 0.205 | 0.21  | 0.214 | 0.22  | 0.225 | 0.23  |
| Central African Republic       | 0.153 | 0.156 | 0.159 | 0.162 | 0.163 | 0.167 | 0.171 | 0.175 | 0.178 | 0.18  | 0.183 | 0.187 | 0.189 | 0.192 | 0.194 | 0.198 | 0.201 | 0.205 | 0.21  | 0.215 |
| Congo (Brazzaville)            | 0.221 | 0.227 | 0.232 | 0.239 | 0.245 | 0.251 | 0.258 | 0.264 | 0.271 | 0.278 | 0.286 | 0.296 | 0.306 | 0.316 | 0.326 | 0.336 | 0.346 | 0.354 | 0.364 | 0.373 |
| DR Congo                       | 0.182 | 0.187 | 0.192 | 0.198 | 0.204 | 0.209 | 0.213 | 0.218 | 0.223 | 0.229 | 0.234 | 0.24  | 0.246 | 0.251 | 0.258 | 0.265 | 0.271 | 0.277 | 0.283 | 0.289 |
| Equatorial Guinea              | 0.049 | 0.05  | 0.05  | 0.054 | 0.071 | 0.083 | 0.094 | 0.106 | 0.117 | 0.128 | 0.137 | 0.146 | 0.154 | 0.162 | 0.168 | 0.174 | 0.179 | 0.184 | 0.189 | 0.195 |
| Gabon                          | 0.252 | 0.26  | 0.269 | 0.275 | 0.283 | 0.292 | 0.304 | 0.314 | 0.322 | 0.329 | 0.338 | 0.348 | 0.357 | 0.365 | 0.374 | 0.383 | 0.392 | 0.402 | 0.412 | 0.422 |
| Eastern sub-Saharan Africa     | 0.155 | 0.158 | 0.161 | 0.164 | 0.166 | 0.169 | 0.173 | 0.176 | 0.18  | 0.183 | 0.187 | 0.192 | 0.196 | 0.2   | 0.205 | 0.209 | 0.213 | 0.217 | 0.222 | 0.226 |
| Burundi                        | 0.141 | 0.146 | 0.149 | 0.153 | 0.157 | 0.161 | 0.165 | 0.171 | 0.176 | 0.182 | 0.188 | 0.194 | 0.2   | 0.206 | 0.212 | 0.218 | 0.225 | 0.231 | 0.236 | 0.242 |
| Comoros                        | 0.157 | 0.161 | 0.165 | 0.171 | 0.176 | 0.18  | 0.184 | 0.187 | 0.191 | 0.196 | 0.201 | 0.207 | 0.212 | 0.217 | 0.221 | 0.227 | 0.237 | 0.247 | 0.256 | 0.265 |
| Djibouti                       | 0.198 | 0.202 | 0.206 | 0.208 | 0.21  | 0.215 | 0.222 | 0.229 | 0.238 | 0.245 | 0.25  | 0.256 | 0.262 | 0.267 | 0.272 | 0.28  | 0.288 | 0.296 | 0.303 | 0.308 |
| Eritrea                        | 0.116 | 0.12  | 0.124 | 0.128 | 0.133 | 0.136 | 0.14  | 0.145 | 0.149 | 0.153 | 0.158 | 0.162 | 0.166 | 0.17  | 0.174 | 0.178 | 0.183 | 0.187 | 0.192 | 0.197 |
| Ethiopia                       | 0.088 | 0.089 | 0.091 | 0.092 | 0.092 | 0.094 | 0.096 | 0.097 | 0.098 | 0.1   | 0.103 | 0.106 | 0.11  | 0.113 | 0.116 | 0.119 | 0.123 | 0.127 | 0.131 | 0.134 |
| Kenya                          | 0.201 | 0.206 | 0.205 | 0.207 | 0.213 | 0.221 | 0.228 | 0.231 | 0.235 | 0.239 | 0.246 | 0.255 | 0.264 | 0.272 | 0.279 | 0.287 | 0.297 | 0.309 | 0.321 | 0.331 |
| Baringo                        | 0.155 | 0.154 | 0.14  | 0.124 | 0.12  | 0.131 | 0.135 | 0.127 | 0.111 | 0.093 | 0.09  | 0.109 | 0.125 | 0.139 | 0.151 | 0.164 | 0.183 | 0.206 | 0.227 | 0.242 |
| Bomet                          | 0.15  | 0.154 | 0.144 | 0.138 | 0.145 | 0.16  | 0.167 | 0.168 | 0.167 | 0.168 | 0.174 | 0.189 | 0.204 | 0.216 | 0.226 | 0.235 | 0.248 | 0.265 | 0.281 | 0.295 |
| Bungoma                        | 0.181 | 0.184 | 0.179 | 0.176 | 0.181 | 0.192 | 0.2   | 0.204 | 0.207 | 0.213 | 0.22  | 0.23  | 0.239 | 0.247 | 0.253 | 0.259 | 0.268 | 0.281 | 0.294 | 0.306 |
| Busia                          | 0.19  | 0.197 | 0.195 | 0.195 | 0.201 | 0.21  | 0.216 | 0.218 | 0.22  | 0.222 | 0.227 | 0.234 | 0.239 | 0.244 | 0.247 | 0.251 | 0.258 | 0.269 | 0.28  | 0.289 |
| Elgeyo Marakwet                | 0.162 | 0.166 | 0.164 | 0.164 | 0.17  | 0.179 | 0.185 | 0.187 | 0.187 | 0.189 | 0.193 | 0.201 | 0.21  | 0.218 | 0.226 | 0.233 | 0.244 | 0.257 | 0.27  | 0.282 |
| Embu                           | 0.209 | 0.214 | 0.215 | 0.219 | 0.227 | 0.236 | 0.243 | 0.248 | 0.255 | 0.263 | 0.272 | 0.282 | 0.293 | 0.303 | 0.312 | 0.321 | 0.332 | 0.344 | 0.355 | 0.366 |
| Garissa                        | 0.09  | 0.093 | 0.091 | 0.091 | 0.093 | 0.096 | 0.098 | 0.098 | 0.097 | 0.098 | 0.1   | 0.103 | 0.106 | 0.109 | 0.111 | 0.114 | 0.119 | 0.127 | 0.137 | 0.145 |
| Homa Bay                       | 0.148 | 0.153 | 0.148 | 0.145 | 0.151 | 0.162 | 0.169 | 0.168 | 0.164 | 0.161 | 0.16  | 0.163 | 0.165 | 0.164 | 0.162 | 0.16  | 0.165 | 0.178 | 0.193 | 0.205 |
| Isiolo                         | 0.188 | 0.192 | 0.192 | 0.193 | 0.197 | 0.203 | 0.207 | 0.208 | 0.21  | 0.213 | 0.216 | 0.22  | 0.224 | 0.227 | 0.229 | 0.232 | 0.237 | 0.244 | 0.251 | 0.258 |
| Kajiado                        | 0.251 | 0.256 | 0.258 | 0.262 | 0.269 | 0.278 | 0.285 | 0.29  | 0.295 | 0.3   | 0.307 | 0.315 | 0.322 | 0.329 | 0.335 | 0.341 | 0.35  | 0.359 | 0.368 | 0.377 |
| Kakamega                       | 0.187 | 0.192 | 0.188 | 0.187 | 0.192 | 0.2   | 0.206 | 0.206 | 0.206 | 0.208 | 0.213 | 0.221 | 0.228 | 0.233 | 0.237 | 0.242 | 0.25  | 0.262 | 0.275 | 0.286 |
| Kericho                        | 0.148 | 0.149 | 0.137 | 0.128 | 0.129 | 0.136 | 0.136 | 0.125 | 0.108 | 0.094 | 0.096 | 0.119 | 0.138 | 0.152 | 0.165 | 0.178 | 0.197 | 0.218 | 0.238 | 0.254 |
| Kiambu                         | 0.256 | 0.263 | 0.264 | 0.268 | 0.276 | 0.286 | 0.294 | 0.3   | 0.30  |       |       |       |       |       |       |       |       |       |       |       |

**Appendix Table 10. Socio-demographic Index values for all estimated GBD 2017 locations, 1970–1989**

| Location                    | 1970  | 1971  | 1972  | 1973  | 1974  | 1975  | 1976  | 1977  | 1978  | 1979  | 1980  | 1981  | 1982  | 1983  | 1984  | 1985  | 1986  | 1987  | 1988  | 1989  |
|-----------------------------|-------|-------|-------|-------|-------|-------|-------|-------|-------|-------|-------|-------|-------|-------|-------|-------|-------|-------|-------|-------|
| Migori                      | 0.151 | 0.154 | 0.148 | 0.145 | 0.151 | 0.161 | 0.167 | 0.166 | 0.163 | 0.161 | 0.162 | 0.168 | 0.173 | 0.175 | 0.175 | 0.177 | 0.184 | 0.197 | 0.21  | 0.221 |
| Mombasa                     | 0.225 | 0.233 | 0.238 | 0.245 | 0.254 | 0.264 | 0.272 | 0.28  | 0.288 | 0.297 | 0.306 | 0.316 | 0.324 | 0.332 | 0.34  | 0.348 | 0.357 | 0.367 | 0.377 | 0.387 |
| Murang'a                    | 0.231 | 0.236 | 0.235 | 0.237 | 0.243 | 0.252 | 0.258 | 0.262 | 0.267 | 0.273 | 0.282 | 0.294 | 0.304 | 0.313 | 0.321 | 0.33  | 0.34  | 0.351 | 0.363 | 0.373 |
| Nairobi                     | 0.315 | 0.325 | 0.332 | 0.34  | 0.351 | 0.363 | 0.374 | 0.384 | 0.393 | 0.403 | 0.413 | 0.423 | 0.432 | 0.44  | 0.448 | 0.455 | 0.463 | 0.473 | 0.482 | 0.491 |
| Nakuru                      | 0.184 | 0.189 | 0.191 | 0.194 | 0.2   | 0.209 | 0.215 | 0.219 | 0.223 | 0.227 | 0.234 | 0.242 | 0.251 | 0.259 | 0.267 | 0.276 | 0.286 | 0.3   | 0.313 | 0.326 |
| Nandi                       | 0.179 | 0.181 | 0.172 | 0.166 | 0.168 | 0.177 | 0.182 | 0.181 | 0.179 | 0.178 | 0.184 | 0.196 | 0.21  | 0.224 | 0.236 | 0.249 | 0.264 | 0.281 | 0.297 | 0.311 |
| Narok                       | 0.093 | 0.086 | 0.061 | 0.062 | 0.063 | 0.064 | 0.065 | 0.066 | 0.067 | 0.068 | 0.069 | 0.07  | 0.071 | 0.072 | 0.101 | 0.121 | 0.144 | 0.169 | 0.191 | 0.206 |
| Nyamira                     | 0.195 | 0.202 | 0.204 | 0.207 | 0.216 | 0.228 | 0.238 | 0.245 | 0.251 | 0.257 | 0.266 | 0.275 | 0.285 | 0.293 | 0.301 | 0.308 | 0.318 | 0.329 | 0.341 | 0.351 |
| Nyandarua                   | 0.184 | 0.193 | 0.193 | 0.195 | 0.201 | 0.211 | 0.218 | 0.22  | 0.222 | 0.227 | 0.235 | 0.247 | 0.26  | 0.272 | 0.283 | 0.293 | 0.305 | 0.319 | 0.332 | 0.344 |
| Nyeri                       | 0.229 | 0.238 | 0.242 | 0.247 | 0.256 | 0.267 | 0.275 | 0.282 | 0.288 | 0.295 | 0.304 | 0.315 | 0.326 | 0.337 | 0.346 | 0.355 | 0.366 | 0.377 | 0.388 | 0.398 |
| Samburu                     | 0.126 | 0.128 | 0.122 | 0.117 | 0.12  | 0.127 | 0.13  | 0.128 | 0.124 | 0.12  | 0.122 | 0.13  | 0.139 | 0.146 | 0.152 | 0.158 | 0.167 | 0.179 | 0.19  | 0.199 |
| Siaya                       | 0.112 | 0.117 | 0.117 | 0.118 | 0.123 | 0.131 | 0.137 | 0.14  | 0.142 | 0.145 | 0.15  | 0.156 | 0.162 | 0.167 | 0.172 | 0.177 | 0.185 | 0.196 | 0.208 | 0.218 |
| Taita Taveta                | 0.199 | 0.205 | 0.207 | 0.211 | 0.218 | 0.226 | 0.233 | 0.239 | 0.245 | 0.251 | 0.259 | 0.268 | 0.276 | 0.284 | 0.292 | 0.3   | 0.309 | 0.32  | 0.331 | 0.342 |
| Tana River                  | 0.116 | 0.122 | 0.124 | 0.128 | 0.134 | 0.143 | 0.149 | 0.154 | 0.158 | 0.163 | 0.169 | 0.177 | 0.183 | 0.188 | 0.192 | 0.196 | 0.202 | 0.209 | 0.217 | 0.224 |
| Tharaka Nithi               | 0.193 | 0.201 | 0.207 | 0.213 | 0.221 | 0.23  | 0.238 | 0.244 | 0.251 | 0.259 | 0.266 | 0.274 | 0.281 | 0.288 | 0.294 | 0.301 | 0.309 | 0.317 | 0.326 | 0.334 |
| Trans Nzoia                 | 0.195 | 0.198 | 0.194 | 0.192 | 0.196 | 0.204 | 0.208 | 0.207 | 0.204 | 0.203 | 0.206 | 0.215 | 0.224 | 0.233 | 0.242 | 0.252 | 0.265 | 0.28  | 0.295 | 0.308 |
| Turkana                     | 0.16  | 0.162 | 0.161 | 0.161 | 0.164 | 0.168 | 0.17  | 0.171 | 0.17  | 0.171 | 0.172 | 0.176 | 0.179 | 0.182 | 0.185 | 0.187 | 0.191 | 0.196 | 0.202 | 0.206 |
| Uasin Gishu                 | 0.203 | 0.207 | 0.204 | 0.203 | 0.209 | 0.219 | 0.226 | 0.228 | 0.23  | 0.232 | 0.239 | 0.25  | 0.263 | 0.275 | 0.286 | 0.296 | 0.309 | 0.324 | 0.339 | 0.352 |
| Vihiga                      | 0.206 | 0.211 | 0.21  | 0.212 | 0.218 | 0.226 | 0.232 | 0.235 | 0.238 | 0.242 | 0.247 | 0.254 | 0.261 | 0.267 | 0.272 | 0.278 | 0.286 | 0.297 | 0.308 | 0.319 |
| Wajir                       | 0.08  | 0.08  | 0.074 | 0.069 | 0.068 | 0.069 | 0.067 | 0.059 | 0.049 | 0.037 | 0.038 | 0.038 | 0.041 | 0.044 | 0.043 | 0.042 | 0.053 | 0.071 | 0.086 | 0.097 |
| West Pokot                  | 0.14  | 0.142 | 0.138 | 0.134 | 0.137 | 0.143 | 0.147 | 0.145 | 0.141 | 0.137 | 0.136 | 0.14  | 0.146 | 0.152 | 0.156 | 0.161 | 0.17  | 0.183 | 0.195 | 0.205 |
| Madagascar                  | 0.158 | 0.163 | 0.169 | 0.175 | 0.18  | 0.185 | 0.19  | 0.196 | 0.202 | 0.207 | 0.212 | 0.219 | 0.226 | 0.233 | 0.238 | 0.244 | 0.249 | 0.253 | 0.257 | 0.26  |
| Malawi                      | 0.119 | 0.123 | 0.127 | 0.131 | 0.134 | 0.137 | 0.14  | 0.144 | 0.147 | 0.151 | 0.156 | 0.16  | 0.164 | 0.169 | 0.174 | 0.18  | 0.184 | 0.189 | 0.192 | 0.196 |
| Mozambique                  | 0.103 | 0.107 | 0.109 | 0.112 | 0.114 | 0.116 | 0.118 | 0.119 | 0.121 | 0.123 | 0.125 | 0.127 | 0.128 | 0.128 | 0.129 | 0.129 | 0.129 | 0.129 | 0.129 | 0.131 |
| Rwanda                      | 0.176 | 0.181 | 0.186 | 0.19  | 0.194 | 0.197 | 0.2   | 0.203 | 0.206 | 0.211 | 0.216 | 0.222 | 0.228 | 0.235 | 0.24  | 0.246 | 0.251 | 0.256 | 0.26  | 0.264 |
| Somalia                     | 0.113 | 0.115 | 0.117 | 0.119 | 0.12  | 0.123 | 0.125 | 0.128 | 0.13  | 0.132 | 0.134 | 0.134 | 0.136 | 0.137 | 0.138 | 0.14  | 0.141 | 0.144 | 0.147 | 0.15  |
| South Sudan                 | 0.139 | 0.141 | 0.143 | 0.145 | 0.148 | 0.15  | 0.153 | 0.155 | 0.158 | 0.16  | 0.162 | 0.165 | 0.167 | 0.169 | 0.17  | 0.172 | 0.173 | 0.175 | 0.176 | 0.178 |
| Tanzania                    | 0.16  | 0.163 | 0.167 | 0.171 | 0.176 | 0.18  | 0.186 | 0.193 | 0.2   | 0.208 | 0.216 | 0.222 | 0.229 | 0.235 | 0.241 | 0.248 | 0.254 | 0.259 | 0.265 | 0.27  |
| Uganda                      | 0.104 | 0.106 | 0.108 | 0.112 | 0.116 | 0.12  | 0.124 | 0.129 | 0.133 | 0.136 | 0.138 | 0.141 | 0.145 | 0.148 | 0.151 | 0.154 | 0.156 | 0.158 | 0.16  | 0.161 |
| Zambia                      | 0.236 | 0.238 | 0.24  | 0.242 | 0.244 | 0.246 | 0.249 | 0.252 | 0.257 | 0.263 | 0.268 | 0.274 | 0.28  | 0.285 | 0.29  | 0.294 | 0.299 | 0.303 | 0.306 | 0.309 |
| Southern sub-Saharan Africa | 0.388 | 0.393 | 0.4   | 0.409 | 0.417 | 0.422 | 0.428 | 0.436 | 0.445 | 0.452 | 0.457 | 0.463 | 0.471 | 0.48  | 0.487 | 0.492 | 0.496 | 0.503 | 0.511 | 0.517 |
| Botswana                    | 0.253 | 0.26  | 0.269 | 0.279 | 0.289 | 0.299 | 0.309 | 0.319 | 0.329 | 0.339 | 0.349 | 0.36  | 0.37  | 0.381 | 0.393 | 0.404 | 0.417 | 0.429 | 0.44  | 0.452 |
| Lesotho                     | 0.221 | 0.223 | 0.227 | 0.232 | 0.238 | 0.242 | 0.247 | 0.254 | 0.263 | 0.269 | 0.276 | 0.282 | 0.288 | 0.293 | 0.299 | 0.304 | 0.31  | 0.315 | 0.32  | 0.327 |
| Namibia                     | 0.324 | 0.329 | 0.335 | 0.342 | 0.349 | 0.356 | 0.364 | 0.371 | 0.379 | 0.386 | 0.393 | 0.401 | 0.408 | 0.414 | 0.421 | 0.427 | 0.432 | 0.438 | 0.444 | 0.449 |
| South Africa                | 0.426 | 0.431 | 0.439 | 0.45  | 0.458 | 0.463 | 0.469 | 0.477 | 0.487 | 0.494 | 0.499 | 0.504 | 0.512 | 0.521 | 0.529 | 0.532 | 0.535 | 0.542 | 0.549 | 0.554 |
| Swaziland                   | 0.283 | 0.289 | 0.294 | 0.299 | 0.305 | 0.311 | 0.317 | 0.323 | 0.329 | 0.334 | 0.34  | 0.348 | 0.356 | 0.363 | 0.371 | 0.379 | 0.388 | 0.398 | 0.408 | 0.417 |
| Zimbabwe                    | 0.246 | 0.252 | 0.258 | 0.264 | 0.271 | 0.277 | 0.283 | 0.288 | 0.294 | 0.3   | 0.308 | 0.316 | 0.326 | 0.336 | 0.346 | 0.358 | 0.369 | 0.38  | 0.39  | 0.4   |
| Western sub-Saharan Africa  | 0.206 | 0.211 | 0.216 | 0.221 | 0.227 | 0.233 | 0.239 | 0.244 | 0.25  | 0.255 | 0.259 | 0.264 | 0.268 | 0.271 | 0.275 | 0.279 | 0.282 | 0.284 | 0.287 | 0.29  |
| Benin                       | 0.147 | 0.15  | 0.153 | 0.156 | 0.159 | 0.162 | 0.165 | 0.168 | 0.171 | 0.174 | 0.178 | 0.182 | 0.185 | 0.189 | 0.193 | 0.197 | 0.201 | 0.206 | 0.21  | 0.214 |
| Burkina Faso                | 0.095 | 0.095 | 0.096 | 0.098 | 0.1   | 0.101 | 0.102 | 0.103 | 0.105 | 0.108 | 0.111 | 0.113 | 0.115 | 0.117 | 0.119 | 0.123 | 0.126 | 0.129 | 0.132 | 0.136 |
| Cameroon                    | 0.215 | 0.218 | 0.222 | 0.225 | 0.229 | 0.234 | 0.238 | 0.244 | 0.25  | 0.256 | 0.261 | 0.267 | 0.273 | 0.28  | 0.288 | 0.295 | 0.303 | 0.311 | 0.318 | 0.326 |
| Cape Verde                  | 0.193 | 0.2   | 0.207 | 0.213 | 0.218 | 0.223 | 0.227 | 0.231 | 0.235 | 0.239 | 0.244 | 0.247 | 0.25  | 0.254 | 0.259 | 0.265 | 0.272 | 0.281 | 0.29  | 0.299 |
| Chad                        | 0.095 | 0.096 | 0.097 | 0.097 | 0.098 | 0.099 | 0.1   | 0.101 | 0.101 | 0.101 | 0.1   | 0.1   | 0.099 | 0.1   | 0.101 | 0.103 | 0.105 | 0.108 | 0.111 | 0.115 |
| Cote d'Ivoire               | 0.19  | 0.195 | 0.199 | 0.204 | 0.208 | 0.213 | 0.217 | 0.219 | 0.222 | 0.224 | 0.226 | 0.228 | 0.23  | 0.233 | 0.236 | 0.24  | 0.245 | 0.252 | 0.259 | 0.266 |
| The Gambia                  | 0.153 | 0.155 | 0.158 | 0.161 | 0.165 | 0.169 | 0.173 | 0.177 | 0.181 | 0.185 | 0.189 | 0.192 | 0.196 | 0.202 | 0.208 | 0.214 | 0.221 | 0.227 | 0.233 | 0.238 |
| Ghana                       | 0.285 | 0.292 | 0.296 | 0.298 | 0.301 | 0.306 | 0.315 | 0.323 | 0.329 | 0.332 | 0.337 | 0.343 | 0.346 | 0.349 | 0.352 | 0.356 | 0.361 | 0.365 | 0.37  | 0.374 |
| Guinea                      | 0.12  | 0.122 | 0.123 | 0.125 | 0.128 | 0.131 | 0.133 | 0.136 | 0.138 | 0.14  | 0.143 | 0.145 | 0.147 | 0.148 | 0.15  | 0.152 | 0.155 | 0.157 | 0.159 | 0.161 |
| Guinea-Bissau               | 0.137 | 0.138 | 0.14  | 0.142 | 0.143 | 0.145 | 0.148 | 0.149 | 0.15  | 0.152 | 0.153 | 0.155 | 0.156 | 0.158 | 0.16  | 0.163 | 0.167 | 0.171 | 0.174 | 0.178 |
| Liberia                     | 0.16  | 0.165 | 0.169 | 0.173 | 0.177 | 0.18  | 0.182 | 0.184 | 0.186 | 0.189 | 0.192 | 0.194 | 0.196 | 0.198 | 0.2   | 0.203 | 0.205 | 0.208 | 0.212 | 0.216 |
| Mali                        | 0.088 | 0.09  | 0.092 | 0.094 | 0.095 | 0.097 | 0.099 | 0.102 | 0.104 | 0.107 | 0.109 | 0.112 | 0.114 | 0.116 | 0.117 | 0.119 | 0.121 | 0.123 | 0.125 | 0.128 |
| Mauritania                  | 0.203 | 0.207 | 0.21  | 0.212 | 0.214 | 0.217 | 0.22  | 0.223 | 0.226 | 0.229 | 0.232 | 0.238 | 0.244 | 0.251 | 0.257 | 0.264 | 0.271 | 0.278 | 0.285 | 0.292 |
| Niger                       | 0.077 | 0.077 | 0.077 | 0.075 | 0.074 | 0.073 | 0.072 | 0.07  | 0.067 | 0.064 | 0.062 | 0.059 | 0.056 | 0.056 | 0.059 | 0.064 | 0.07  | 0.076 | 0.082 | 0.088 |
| Nigeria                     | 0.237 | 0.245 | 0.252 | 0.26  | 0.268 | 0.276 | 0.284 | 0.292 | 0.3   | 0.307 | 0.313 | 0.319 | 0.324 | 0.329 | 0.333 | 0.337 | 0.339 | 0.339 | 0.341 | 0.342 |
| Sao Tome and Principe       | 0.184 | 0.19  | 0.197 | 0.204 | 0.209 | 0.215 | 0.221 | 0.228 | 0.234 | 0.24  | 0.244 | 0.249 | 0.253 | 0.257 | 0.26  | 0.264 | 0.268 | 0.273 | 0.278 | 0.283 |
| Senegal                     | 0.157 | 0.159 | 0.161 | 0.163 | 0.165 | 0.168 | 0.171 | 0.174 | 0.176 | 0.18  | 0.184 | 0.188 | 0.192 | 0.198 | 0.204 | 0.21  | 0.216 | 0.222 | 0.23  | 0.237 |
| Sierra Leone                | 0.149 | 0.153 | 0.156 | 0.16  | 0.163 | 0.167 | 0.17  | 0.173 | 0.175 | 0.176 | 0.178 | 0.18  | 0.182 | 0.183 | 0.185 | 0.187 | 0.189 | 0.191 | 0.194 | 0.198 |
| Togo                        | 0.163 | 0.167 | 0.171 | 0.174 | 0.179 | 0.183 | 0.187 | 0.192 | 0.197 | 0.203 | 0.209 | 0.214 | 0.219 | 0.224 | 0.229 | 0.234 | 0.239 | 0.244 | 0.25  | 0.256 |

| Appendix Table 11. Socio-demographic index values for all estimated GBD 2017 locations, 1990-2017 |       |       |       |       |       |       |       |       |       |       |       |       |       |       |       |       |       |       |       |       |       |       |       |       |       |       |       |       |       |
|---------------------------------------------------------------------------------------------------|-------|-------|-------|-------|-------|-------|-------|-------|-------|-------|-------|-------|-------|-------|-------|-------|-------|-------|-------|-------|-------|-------|-------|-------|-------|-------|-------|-------|-------|
| Location                                                                                          | 1990  | 1991  | 1992  | 1993  | 1994  | 1995  | 1996  | 1997  | 1998  | 1999  | 2000  | 2001  | 2002  | 2003  | 2004  | 2005  | 2006  | 2007  | 2008  | 2009  | 2010  | 2011  | 2012  | 2013  | 2014  | 2015  | 2016  | 2017  |       |
| Global                                                                                            | 0.523 | 0.529 | 0.534 | 0.539 | 0.543 | 0.548 | 0.553 | 0.557 | 0.561 | 0.566 | 0.571 | 0.576 | 0.581 | 0.585 | 0.589 | 0.595 | 0.601 | 0.606 | 0.611 | 0.616 | 0.62  | 0.623 | 0.628 | 0.633 | 0.639 | 0.644 | 0.647 | 0.652 |       |
| Central Europe, Eastern Europe, and Central Asia                                                  | 0.656 | 0.662 | 0.67  | 0.674 | 0.677 | 0.682 | 0.686 | 0.689 | 0.691 | 0.694 | 0.698 | 0.701 | 0.703 | 0.709 | 0.715 | 0.72  | 0.725 | 0.73  | 0.735 | 0.739 | 0.743 | 0.747 | 0.75  | 0.753 | 0.757 | 0.76  | 0.763 | 0.766 |       |
| Central Asia                                                                                      | 0.563 | 0.567 | 0.57  | 0.573 | 0.575 | 0.577 | 0.578 | 0.579 | 0.58  | 0.582 | 0.583 | 0.584 | 0.585 | 0.586 | 0.587 | 0.588 | 0.589 | 0.59  | 0.591 | 0.592 | 0.593 | 0.594 | 0.595 | 0.596 | 0.597 | 0.598 | 0.599 | 0.601 | 0.603 |
| Armenia                                                                                           | 0.555 | 0.559 | 0.56  | 0.562 | 0.565 | 0.567 | 0.57  | 0.573 | 0.577 | 0.581 | 0.586 | 0.592 | 0.6   | 0.61  | 0.619 | 0.629 | 0.639 | 0.65  | 0.66  | 0.667 | 0.673 | 0.678 | 0.683 | 0.687 | 0.691 | 0.695 | 0.699 | 0.702 | 0.705 |
| Azerbaijan                                                                                        | 0.611 | 0.613 | 0.616 | 0.618 | 0.621 | 0.623 | 0.625 | 0.627 | 0.629 | 0.631 | 0.633 | 0.635 | 0.637 | 0.639 | 0.641 | 0.643 | 0.645 | 0.647 | 0.649 | 0.651 | 0.653 | 0.655 | 0.657 | 0.659 | 0.661 | 0.663 | 0.665 | 0.667 | 0.669 |
| Georgia                                                                                           | 0.554 | 0.56  | 0.561 | 0.563 | 0.565 | 0.567 | 0.569 | 0.571 | 0.573 | 0.575 | 0.577 | 0.579 | 0.581 | 0.583 | 0.585 | 0.587 | 0.589 | 0.591 | 0.593 | 0.595 | 0.597 | 0.599 | 0.601 | 0.603 | 0.605 | 0.607 | 0.609 | 0.611 | 0.613 |
| Kazakhstan                                                                                        | 0.613 | 0.615 | 0.619 | 0.623 | 0.627 | 0.631 | 0.635 | 0.639 | 0.643 | 0.647 | 0.651 | 0.655 | 0.659 | 0.663 | 0.667 | 0.671 | 0.675 | 0.679 | 0.683 | 0.687 | 0.691 | 0.695 | 0.699 | 0.703 | 0.707 | 0.711 | 0.715 | 0.719 | 0.723 |
| Kyrgyzstan                                                                                        | 0.565 | 0.571 | 0.576 | 0.577 | 0.578 | 0.579 | 0.58  | 0.581 | 0.582 | 0.583 | 0.584 | 0.585 | 0.586 | 0.587 | 0.588 | 0.589 | 0.59  | 0.591 | 0.592 | 0.593 | 0.594 | 0.595 | 0.596 | 0.597 | 0.598 | 0.599 | 0.601 | 0.603 | 0.605 |
| Mongolia                                                                                          | 0.537 | 0.545 | 0.55  | 0.555 | 0.559 | 0.564 | 0.569 | 0.573 | 0.577 | 0.581 | 0.585 | 0.589 | 0.594 | 0.598 | 0.603 | 0.608 | 0.614 | 0.619 | 0.624 | 0.628 | 0.632 | 0.636 | 0.641 | 0.646 | 0.65  | 0.654 | 0.658 | 0.662 | 0.666 |
| Tajikistan                                                                                        | 0.474 | 0.481 | 0.485 | 0.487 | 0.489 | 0.491 | 0.493 | 0.495 | 0.497 | 0.499 | 0.501 | 0.503 | 0.505 | 0.507 | 0.509 | 0.511 | 0.513 | 0.515 | 0.517 | 0.519 | 0.521 | 0.523 | 0.525 | 0.527 | 0.529 | 0.531 | 0.533 | 0.535 | 0.537 |
| Turkmenistan                                                                                      | 0.588 | 0.592 | 0.594 | 0.599 | 0.602 | 0.604 | 0.606 | 0.608 | 0.61  | 0.612 | 0.614 | 0.616 | 0.618 | 0.62  | 0.622 | 0.624 | 0.626 | 0.628 | 0.63  | 0.632 | 0.634 | 0.636 | 0.638 | 0.64  | 0.642 | 0.644 | 0.646 | 0.648 | 0.65  |
| Ukraine                                                                                           | 0.481 | 0.481 | 0.487 | 0.493 | 0.497 | 0.502 | 0.508 | 0.513 | 0.52  | 0.526 | 0.532 | 0.537 | 0.543 | 0.549 | 0.555 | 0.56  | 0.565 | 0.57  | 0.575 | 0.581 | 0.587 | 0.592 | 0.598 | 0.604 | 0.61  | 0.616 | 0.621 | 0.626 | 0.631 |
| Central Europe                                                                                    | 0.665 | 0.671 | 0.677 | 0.683 | 0.689 | 0.696 | 0.703 | 0.711 | 0.717 | 0.723 | 0.731 | 0.738 | 0.745 | 0.751 | 0.757 | 0.762 | 0.767 | 0.772 | 0.776 | 0.78  | 0.782 | 0.784 | 0.786 | 0.788 | 0.79  | 0.792 | 0.794 | 0.796 | 0.798 |
| Albania                                                                                           | 0.548 | 0.545 | 0.542 | 0.541 | 0.542 | 0.546 | 0.552 | 0.558 | 0.566 | 0.577 | 0.584 | 0.593 | 0.602 | 0.611 | 0.619 | 0.627 | 0.635 | 0.642 | 0.648 | 0.653 | 0.658 | 0.661 | 0.665 | 0.668 | 0.672 | 0.676 | 0.681 | 0.685 |       |
| Bosnia and Herzegovina                                                                            | 0.497 | 0.499 | 0.5   | 0.5   | 0.501 | 0.507 | 0.525 | 0.549 | 0.571 | 0.592 | 0.607 | 0.619 | 0.63  | 0.639 | 0.647 | 0.654 | 0.66  | 0.667 | 0.673 | 0.679 | 0.685 | 0.69  | 0.694 | 0.699 | 0.703 | 0.706 | 0.71  | 0.713 |       |
| Bulgaria                                                                                          | 0.658 | 0.668 | 0.676 | 0.684 | 0.693 | 0.699 | 0.705 | 0.706 | 0.704 | 0.703 | 0.708 | 0.715 | 0.721 | 0.726 | 0.731 | 0.736 | 0.741 | 0.746 | 0.751 | 0.757 | 0.765 | 0.771 | 0.775 | 0.778 | 0.781 | 0.784 | 0.788 | 0.792 | 0.796 |
| Croatia                                                                                           | 0.725 | 0.73  | 0.732 | 0.732 | 0.731 | 0.731 | 0.732 | 0.733 | 0.734 | 0.735 | 0.736 | 0.737 | 0.738 | 0.739 | 0.74  | 0.741 | 0.742 | 0.743 | 0.744 | 0.745 | 0.746 | 0.747 | 0.748 | 0.749 | 0.75  | 0.751 | 0.752 | 0.753 | 0.754 |
| Czech Republic                                                                                    | 0.711 | 0.717 | 0.726 | 0.734 | 0.757 | 0.769 | 0.777 | 0.783 | 0.788 | 0.794 | 0.799 | 0.804 | 0.809 | 0.814 | 0.819 | 0.823 | 0.827 | 0.83  | 0.833 | 0.836 | 0.84  | 0.843 | 0.846 | 0.847 | 0.848 | 0.849 | 0.85  | 0.851 | 0.852 |
| Hungary                                                                                           | 0.678 | 0.683 | 0.691 | 0.699 | 0.707 | 0.716 | 0.722 | 0.729 | 0.734 | 0.74  | 0.745 | 0.75  | 0.755 | 0.76  | 0.765 | 0.77  | 0.775 | 0.78  | 0.785 | 0.79  | 0.795 | 0.801 | 0.806 | 0.81  | 0.815 | 0.82  | 0.825 | 0.83  | 0.835 |
| Macedonia                                                                                         | 0.626 | 0.629 | 0.63  | 0.631 | 0.632 | 0.635 | 0.64  | 0.647 | 0.654 | 0.661 | 0.667 | 0.673 | 0.679 | 0.685 | 0.691 | 0.697 | 0.704 | 0.709 | 0.715 | 0.719 | 0.724 | 0.729 | 0.734 | 0.739 | 0.744 | 0.748 | 0.751 | 0.754 |       |
| Montenegro                                                                                        | 0.705 | 0.706 | 0.705 | 0.701 | 0.698 | 0.696 | 0.696 | 0.696 | 0.697 | 0.7   | 0.703 | 0.706 | 0.711 | 0.716 | 0.721 | 0.726 | 0.731 | 0.737 | 0.743 | 0.75  | 0.756 | 0.761 | 0.767 | 0.771 | 0.775 | 0.779 | 0.782 | 0.785 | 0.788 |
| Poland                                                                                            | 0.662 | 0.668 | 0.678 | 0.686 | 0.697 | 0.707 | 0.714 | 0.724 | 0.733 | 0.741 | 0.75  | 0.759 | 0.767 | 0.773 | 0.779 | 0.784 | 0.789 | 0.792 | 0.797 | 0.804 | 0.811 | 0.818 | 0.823 | 0.829 | 0.833 | 0.837 | 0.841 | 0.844 | 0.847 |
| Romania                                                                                           | 0.652 | 0.66  | 0.663 | 0.666 | 0.671 | 0.678 | 0.682 | 0.685 | 0.689 | 0.694 | 0.7   | 0.707 | 0.713 | 0.718 | 0.724 | 0.73  | 0.734 | 0.739 | 0.745 | 0.751 | 0.758 | 0.763 | 0.768 | 0.772 | 0.774 | 0.777 | 0.78  | 0.784 |       |
| Serbia                                                                                            | 0.632 | 0.638 | 0.642 | 0.642 | 0.641 | 0.641 | 0.643 | 0.648 | 0.653 | 0.655 | 0.661 | 0.665 | 0.669 | 0.673 | 0.678 | 0.684 | 0.69  | 0.695 | 0.709 | 0.713 | 0.718 | 0.723 | 0.729 | 0.736 | 0.742 | 0.747 | 0.75  | 0.752 |       |
| Slovakia                                                                                          | 0.684 | 0.69  | 0.699 | 0.71  | 0.722 | 0.732 | 0.74  | 0.748 | 0.756 | 0.764 | 0.772 | 0.779 | 0.784 | 0.788 | 0.793 | 0.798 | 0.804 | 0.809 | 0.814 | 0.818 | 0.823 | 0.828 | 0.832 | 0.834 | 0.836 | 0.838 | 0.839 | 0.842 | 0.845 |
| Slovenia                                                                                          | 0.741 | 0.745 | 0.751 | 0.758 | 0.764 | 0.771 | 0.778 | 0.784 | 0.79  | 0.796 | 0.801 | 0.806 | 0.811 | 0.816 | 0.821 | 0.826 | 0.831 | 0.836 | 0.841 | 0.846 | 0.851 | 0.856 | 0.861 | 0.866 | 0.871 | 0.876 | 0.881 | 0.886 | 0.891 |
| Eastern Europe                                                                                    | 0.678 | 0.685 | 0.688 | 0.698 | 0.7   | 0.704 | 0.708 | 0.711 | 0.713 | 0.715 | 0.717 | 0.719 | 0.721 | 0.723 | 0.725 | 0.727 | 0.729 | 0.731 | 0.733 | 0.735 | 0.737 | 0.739 | 0.741 | 0.743 | 0.745 | 0.747 | 0.749 | 0.751 | 0.753 |
| Belarus                                                                                           | 0.625 | 0.631 | 0.636 | 0.641 | 0.645 | 0.647 | 0.65  | 0.654 | 0.657 | 0.661 | 0.665 | 0.67  | 0.676 | 0.682 | 0.689 | 0.696 | 0.704 | 0.712 | 0.72  | 0.727 | 0.733 | 0.74  | 0.747 | 0.753 | 0.759 | 0.764 | 0.769 | 0.773 |       |
| Estonia                                                                                           | 0.711 | 0.719 | 0.728 | 0.736 | 0.742 | 0.746 | 0.75  | 0.755 | 0.76  | 0.766 | 0.772 | 0.778 | 0.783 | 0.788 | 0.794 | 0.799 | 0.806 | 0.813 | 0.82  | 0.826 | 0.832 | 0.838 | 0.843 | 0.847 | 0.851 | 0.854 | 0.856 | 0.858 | 0.86  |
| Latvia                                                                                            | 0.696 | 0.703 | 0.712 | 0.721 | 0.727 | 0.731 | 0.733 | 0.734 | 0.735 | 0.738 | 0.741 | 0.745 | 0.75  | 0.757 | 0.763 | 0.769 | 0.776 | 0.783 | 0.792 | 0.8   | 0.806 | 0.811 | 0.814 | 0.816 | 0.817 | 0.818 | 0.819 | 0.82  | 0.821 |
| Lithuania                                                                                         | 0.707 | 0.713 | 0.717 | 0.725 | 0.728 | 0.731 | 0.733 | 0.736 | 0.74  | 0.746 | 0.751 | 0.756 | 0.762 | 0.767 | 0.772 | 0.779 | 0.785 | 0.79  | 0.796 | 0.802 | 0.808 | 0.813 | 0.818 | 0.823 | 0.828 | 0.833 | 0.838 | 0.843 | 0.848 |
| Moldova                                                                                           | 0.575 | 0.578 | 0.58  | 0.582 | 0.583 | 0.584 | 0.584 | 0.582 | 0.58  | 0.577 | 0.574 | 0.574 | 0.577 | 0.582 | 0.588 | 0.595 | 0.602 | 0.61  | 0.618 | 0.624 | 0.632 | 0.64  | 0.647 | 0.654 | 0.66  | 0.666 | 0.671 | 0.676 |       |
| Russia Federation                                                                                 | 0.683 | 0.692 | 0.704 | 0.708 | 0.708 | 0.714 | 0.718 | 0.719 | 0.72  | 0.722 | 0.724 | 0.724 | 0.728 | 0.734 | 0.742 | 0.747 | 0.752 | 0.757 | 0.763 | 0.768 | 0.777 | 0.772 | 0.774 | 0.779 | 0.781 | 0.785 | 0.789 | 0.792 | 0.796 |
| Ukraine                                                                                           | 0.664 | 0.667 | 0.673 | 0.681 | 0.687 | 0.696 | 0.705 | 0.713 | 0.721 | 0.729 | 0.737 | 0.745 | 0.753 | 0.761 | 0.769 | 0.777 | 0.785 | 0.793 | 0.801 | 0.809 | 0.817 | 0.825 | 0.833 | 0.841 | 0.849 | 0.857 | 0.865 | 0.873 | 0.881 |
| High-income                                                                                       | 0.769 | 0.774 | 0.779 | 0.783 | 0.787 | 0.792 | 0.796 | 0.798 | 0.801 | 0.804 | 0.807 | 0.811 | 0.814 | 0.817 | 0.822 | 0.827 | 0.832 | 0.837 | 0.842 | 0.847 | 0.852 | 0.857 | 0.862 | 0.867 | 0.872 | 0.877 | 0.882 | 0.887 | 0.892 |
| Australia                                                                                         | 0.783 | 0.786 | 0.79  | 0.794 | 0.797 | 0.801 | 0.805 | 0.809 | 0.813 | 0.817 | 0.821 | 0.825 | 0.828 | 0.832 | 0.835 | 0.837 | 0.838 | 0.84  | 0.842 | 0.845 | 0.848 | 0.851 | 0.854 | 0.856 | 0.858 | 0.86  | 0.862 | 0.864 | 0.866 |
| Australia                                                                                         | 0.786 | 0.79  | 0.793 | 0.797 | 0.801 | 0.805 | 0.81  | 0.814 | 0.818 | 0.822 | 0.825 | 0.829 | 0.833 |       |       |       |       |       |       |       |       |       |       |       |       |       |       |       |       |





Appendix Table 11. Socio-demographic Index values for all estimated GBD 2017 locations, 1990-2017

| Location                      | 1990  | 1991  | 1992  | 1993  | 1994  | 1995  | 1996  | 1997  | 1998  | 1999  | 2000  | 2001  | 2002  | 2003  | 2004  | 2005  | 2006  | 2007  | 2008  | 2009  | 2010  | 2011  | 2012  | 2013  | 2014  | 2015  | 2016  | 2017  |       |       |       |       |       |       |       |
|-------------------------------|-------|-------|-------|-------|-------|-------|-------|-------|-------|-------|-------|-------|-------|-------|-------|-------|-------|-------|-------|-------|-------|-------|-------|-------|-------|-------|-------|-------|-------|-------|-------|-------|-------|-------|-------|
| Si Heilens                    | 0.684 | 0.691 | 0.696 | 0.703 | 0.709 | 0.713 | 0.716 | 0.722 | 0.725 | 0.731 | 0.738 | 0.744 | 0.749 | 0.753 | 0.756 | 0.759 | 0.762 | 0.765 | 0.768 | 0.771 | 0.774 | 0.779 | 0.782 | 0.785 | 0.791 | 0.795 | 0.798 | 0.801 | 0.803 |       |       |       |       |       |       |
| Slovakia                      | 0.727 | 0.734 | 0.741 | 0.748 | 0.754 | 0.759 | 0.763 | 0.767 | 0.772 | 0.779 | 0.786 | 0.791 | 0.796 | 0.799 | 0.803 | 0.806 | 0.809 | 0.812 | 0.814 | 0.817 | 0.821 | 0.823 | 0.826 | 0.829 | 0.833 | 0.837 | 0.841 | 0.845 | 0.848 |       |       |       |       |       |       |
| Tanzania                      | 0.691 | 0.697 | 0.703 | 0.711 | 0.716 | 0.721 | 0.724 | 0.728 | 0.734 | 0.741 | 0.746 | 0.751 | 0.755 | 0.758 | 0.761 | 0.762 | 0.763 | 0.764 | 0.766 | 0.768 | 0.771 | 0.774 | 0.778 | 0.782 | 0.785 | 0.789 | 0.793 | 0.795 | 0.797 |       |       |       |       |       |       |
| Tanzania                      | 0.751 | 0.757 | 0.764 | 0.771 | 0.778 | 0.782 | 0.786 | 0.791 | 0.795 | 0.802 | 0.809 | 0.815 | 0.822 | 0.824 | 0.826 | 0.829 | 0.832 | 0.836 | 0.839 | 0.842 | 0.844 | 0.848 | 0.852 | 0.856 | 0.862 | 0.865 | 0.868 | 0.871 | 0.873 |       |       |       |       |       |       |
| Warrington                    | 0.739 | 0.745 | 0.752 | 0.759 | 0.765 | 0.769 | 0.773 | 0.776 | 0.782 | 0.788 | 0.795 | 0.801 | 0.807 | 0.811 | 0.814 | 0.818 | 0.822 | 0.825 | 0.827 | 0.831 | 0.833 | 0.838 | 0.843 | 0.849 | 0.853 | 0.856 | 0.858 | 0.861 | 0.863 |       |       |       |       |       |       |
| Wigan                         | 0.691 | 0.697 | 0.703 | 0.711 | 0.716 | 0.721 | 0.724 | 0.728 | 0.734 | 0.741 | 0.746 | 0.751 | 0.755 | 0.758 | 0.761 | 0.762 | 0.763 | 0.764 | 0.766 | 0.768 | 0.771 | 0.774 | 0.778 | 0.782 | 0.785 | 0.789 | 0.793 | 0.795 | 0.797 |       |       |       |       |       |       |
| Winal                         | 0.695 | 0.701 | 0.708 | 0.714 | 0.721 | 0.725 | 0.728 | 0.732 | 0.737 | 0.743 | 0.749 | 0.753 | 0.757 | 0.761 | 0.763 | 0.766 | 0.768 | 0.771 | 0.773 | 0.775 | 0.777 | 0.781 | 0.786 | 0.792 | 0.796 | 0.799 | 0.801 | 0.803 | 0.805 |       |       |       |       |       |       |
| South East England            | 0.749 | 0.755 | 0.761 | 0.767 | 0.773 | 0.777 | 0.781 | 0.784 | 0.789 | 0.795 | 0.801 | 0.806 | 0.809 | 0.812 | 0.815 | 0.818 | 0.821 | 0.823 | 0.826 | 0.828 | 0.831 | 0.834 | 0.836 | 0.841 | 0.846 | 0.851 | 0.852 | 0.853 | 0.854 | 0.856 |       |       |       |       |       |
| Blackburn                     | 0.759 | 0.764 | 0.771 | 0.778 | 0.784 | 0.790 | 0.796 | 0.802 | 0.808 | 0.814 | 0.820 | 0.826 | 0.832 | 0.838 | 0.844 | 0.849 | 0.854 | 0.859 | 0.864 | 0.869 | 0.874 | 0.879 | 0.884 | 0.889 | 0.894 | 0.899 | 0.904 | 0.909 | 0.914 | 0.919 |       |       |       |       |       |
| Hickson and Howe              | 0.766 | 0.772 | 0.779 | 0.785 | 0.791 | 0.796 | 0.801 | 0.806 | 0.811 | 0.816 | 0.822 | 0.827 | 0.833 | 0.838 | 0.843 | 0.847 | 0.851 | 0.855 | 0.859 | 0.863 | 0.867 | 0.871 | 0.875 | 0.879 | 0.883 | 0.887 | 0.891 | 0.895 | 0.899 |       |       |       |       |       |       |
| Buckinghamshire               | 0.764 | 0.769 | 0.775 | 0.782 | 0.788 | 0.792 | 0.795 | 0.799 | 0.804 | 0.811 | 0.815 | 0.822 | 0.824 | 0.826 | 0.829 | 0.832 | 0.834 | 0.836 | 0.838 | 0.841 | 0.842 | 0.846 | 0.848 | 0.851 | 0.853 | 0.855 | 0.857 | 0.859 | 0.861 | 0.863 |       |       |       |       |       |
| East Sussex                   | 0.744 | 0.748 | 0.754 | 0.761 | 0.768 | 0.774 | 0.781 | 0.787 | 0.794 | 0.799 | 0.806 | 0.812 | 0.818 | 0.824 | 0.829 | 0.834 | 0.839 | 0.844 | 0.849 | 0.854 | 0.859 | 0.864 | 0.869 | 0.874 | 0.879 | 0.884 | 0.889 | 0.894 | 0.899 | 0.904 |       |       |       |       |       |
| Hampshire                     | 0.712 | 0.715 | 0.720 | 0.726 | 0.732 | 0.737 | 0.742 | 0.747 | 0.752 | 0.757 | 0.762 | 0.767 | 0.772 | 0.777 | 0.782 | 0.787 | 0.792 | 0.797 | 0.802 | 0.807 | 0.812 | 0.817 | 0.822 | 0.827 | 0.832 | 0.837 | 0.842 | 0.847 | 0.852 | 0.857 |       |       |       |       |       |
| Isle of Wight                 | 0.704 | 0.709 | 0.715 | 0.722 | 0.727 | 0.732 | 0.737 | 0.742 | 0.747 | 0.752 | 0.757 | 0.762 | 0.767 | 0.772 | 0.777 | 0.782 | 0.787 | 0.792 | 0.797 | 0.802 | 0.807 | 0.812 | 0.817 | 0.822 | 0.827 | 0.832 | 0.837 | 0.842 | 0.847 | 0.852 |       |       |       |       |       |
| Kent                          | 0.723 | 0.728 | 0.734 | 0.741 | 0.748 | 0.754 | 0.761 | 0.767 | 0.774 | 0.781 | 0.787 | 0.794 | 0.801 | 0.807 | 0.814 | 0.821 | 0.827 | 0.834 | 0.841 | 0.847 | 0.854 | 0.861 | 0.867 | 0.874 | 0.881 | 0.888 | 0.894 | 0.901 | 0.908 | 0.915 |       |       |       |       |       |
| Medway                        | 0.703 | 0.709 | 0.715 | 0.722 | 0.728 | 0.734 | 0.741 | 0.747 | 0.754 | 0.761 | 0.767 | 0.774 | 0.781 | 0.787 | 0.794 | 0.801 | 0.807 | 0.814 | 0.821 | 0.827 | 0.834 | 0.841 | 0.847 | 0.854 | 0.861 | 0.867 | 0.874 | 0.881 | 0.888 | 0.894 |       |       |       |       |       |
| Milton Keynes                 | 0.754 | 0.761 | 0.767 | 0.774 | 0.781 | 0.787 | 0.794 | 0.801 | 0.807 | 0.814 | 0.821 | 0.827 | 0.834 | 0.841 | 0.847 | 0.854 | 0.861 | 0.867 | 0.874 | 0.881 | 0.888 | 0.894 | 0.901 | 0.908 | 0.915 | 0.922 | 0.929 | 0.936 | 0.943 | 0.950 |       |       |       |       |       |
| Oxfordshire                   | 0.769 | 0.775 | 0.781 | 0.788 | 0.794 | 0.799 | 0.804 | 0.809 | 0.814 | 0.819 | 0.824 | 0.829 | 0.834 | 0.839 | 0.844 | 0.849 | 0.854 | 0.859 | 0.864 | 0.869 | 0.874 | 0.879 | 0.884 | 0.889 | 0.894 | 0.899 | 0.904 | 0.909 | 0.914 | 0.919 | 0.924 |       |       |       |       |
| Portsmouth                    | 0.75  | 0.756 | 0.763 | 0.77  | 0.776 | 0.781 | 0.785 | 0.79  | 0.795 | 0.801 | 0.805 | 0.81  | 0.815 | 0.819 | 0.822 | 0.824 | 0.827 | 0.829 | 0.832 | 0.835 | 0.838 | 0.842 | 0.846 | 0.851 | 0.854 | 0.857 | 0.861 | 0.864 | 0.868 | 0.871 | 0.875 |       |       |       |       |
| Reading                       | 0.785 | 0.791 | 0.797 | 0.803 | 0.809 | 0.813 | 0.817 | 0.821 | 0.825 | 0.83  | 0.834 | 0.84  | 0.847 | 0.852 | 0.856 | 0.86  | 0.864 | 0.868 | 0.87  | 0.872 | 0.874 | 0.877 | 0.881 | 0.884 | 0.887 | 0.891 | 0.894 | 0.898 | 0.901 | 0.905 |       |       |       |       |       |
| Slough                        | 0.764 | 0.77  | 0.777 | 0.784 | 0.791 | 0.797 | 0.803 | 0.809 | 0.815 | 0.821 | 0.827 | 0.833 | 0.839 | 0.845 | 0.851 | 0.857 | 0.863 | 0.869 | 0.875 | 0.881 | 0.887 | 0.893 | 0.899 | 0.905 | 0.911 | 0.917 | 0.923 | 0.929 | 0.935 | 0.941 | 0.947 |       |       |       |       |
| Southampton                   | 0.752 | 0.758 | 0.765 | 0.772 | 0.779 | 0.784 | 0.789 | 0.794 | 0.798 | 0.803 | 0.808 | 0.813 | 0.818 | 0.823 | 0.828 | 0.833 | 0.838 | 0.843 | 0.848 | 0.853 | 0.858 | 0.863 | 0.868 | 0.873 | 0.878 | 0.883 | 0.888 | 0.893 | 0.898 | 0.903 | 0.908 |       |       |       |       |
| Southampton                   | 0.781 | 0.787 | 0.793 | 0.799 | 0.805 | 0.811 | 0.817 | 0.823 | 0.829 | 0.835 | 0.841 | 0.847 | 0.853 | 0.859 | 0.865 | 0.871 | 0.877 | 0.883 | 0.889 | 0.895 | 0.901 | 0.907 | 0.913 | 0.919 | 0.925 | 0.931 | 0.937 | 0.943 | 0.949 | 0.955 | 0.961 |       |       |       |       |
| West Berkshire                | 0.774 | 0.781 | 0.786 | 0.791 | 0.796 | 0.801 | 0.806 | 0.811 | 0.816 | 0.821 | 0.826 | 0.831 | 0.836 | 0.841 | 0.846 | 0.851 | 0.856 | 0.861 | 0.866 | 0.871 | 0.876 | 0.881 | 0.886 | 0.891 | 0.896 | 0.901 | 0.906 | 0.911 | 0.916 | 0.921 | 0.926 |       |       |       |       |
| West Sussex                   | 0.74  | 0.745 | 0.751 | 0.757 | 0.763 | 0.769 | 0.775 | 0.781 | 0.787 | 0.793 | 0.799 | 0.805 | 0.811 | 0.817 | 0.823 | 0.829 | 0.835 | 0.841 | 0.847 | 0.853 | 0.859 | 0.865 | 0.871 | 0.877 | 0.883 | 0.889 | 0.895 | 0.901 | 0.907 | 0.913 | 0.919 | 0.925 |       |       |       |
| Windsor and Maidenhead        | 0.778 | 0.783 | 0.789 | 0.795 | 0.801 | 0.806 | 0.811 | 0.816 | 0.821 | 0.826 | 0.831 | 0.836 | 0.841 | 0.846 | 0.851 | 0.856 | 0.861 | 0.866 | 0.871 | 0.876 | 0.881 | 0.886 | 0.891 | 0.896 | 0.901 | 0.906 | 0.911 | 0.916 | 0.921 | 0.926 | 0.931 | 0.936 |       |       |       |
| Wokingham                     | 0.778 | 0.784 | 0.791 | 0.797 | 0.802 | 0.806 | 0.811 | 0.816 | 0.821 | 0.826 | 0.831 | 0.836 | 0.841 | 0.846 | 0.851 | 0.856 | 0.861 | 0.866 | 0.871 | 0.876 | 0.881 | 0.886 | 0.891 | 0.896 | 0.901 | 0.906 | 0.911 | 0.916 | 0.921 | 0.926 | 0.931 | 0.936 |       |       |       |
| South West England            | 0.729 | 0.735 | 0.741 | 0.748 | 0.754 | 0.758 | 0.762 | 0.766 | 0.771 | 0.777 | 0.783 | 0.788 | 0.792 | 0.796 | 0.799 | 0.802 | 0.805 | 0.808 | 0.811 | 0.814 | 0.817 | 0.821 | 0.824 | 0.828 | 0.831 | 0.835 | 0.838 | 0.841 | 0.844 | 0.848 | 0.851 | 0.854 |       |       |       |
| North and North East Somerset | 0.752 | 0.758 | 0.764 | 0.771 | 0.777 | 0.782 | 0.786 | 0.791 | 0.796 | 0.803 | 0.809 | 0.816 | 0.822 | 0.828 | 0.833 | 0.838 | 0.843 | 0.848 | 0.853 | 0.858 | 0.863 | 0.868 | 0.873 | 0.878 | 0.883 | 0.888 | 0.893 | 0.898 | 0.903 | 0.908 | 0.913 | 0.918 | 0.923 |       |       |
| Bournemouth                   | 0.736 | 0.743 | 0.75  | 0.757 | 0.763 | 0.768 | 0.773 | 0.778 | 0.784 | 0.791 | 0.797 | 0.803 | 0.809 | 0.815 | 0.821 | 0.826 | 0.831 | 0.836 | 0.841 | 0.846 | 0.851 | 0.856 | 0.861 | 0.866 | 0.871 | 0.876 | 0.881 | 0.886 | 0.891 | 0.896 | 0.901 | 0.906 | 0.911 |       |       |
| Bristol City                  | 0.712 | 0.717 | 0.723 | 0.729 | 0.735 | 0.741 | 0.747 | 0.753 | 0.759 | 0.765 | 0.771 | 0.777 | 0.783 | 0.789 | 0.795 | 0.801 | 0.807 | 0.813 | 0.819 | 0.825 | 0.831 | 0.837 | 0.843 | 0.849 | 0.855 | 0.861 | 0.867 | 0.873 | 0.879 | 0.885 | 0.891 | 0.897 | 0.903 |       |       |
| Cardiff                       | 0.7   | 0.706 | 0.713 | 0.721 | 0.727 | 0.733 | 0.739 | 0.745 | 0.751 | 0.757 | 0.763 | 0.769 | 0.775 | 0.781 | 0.787 | 0.793 | 0.799 | 0.805 | 0.811 | 0.817 | 0.823 | 0.829 | 0.835 | 0.841 | 0.847 | 0.853 | 0.859 | 0.865 | 0.871 | 0.877 | 0.883 | 0.889 | 0.895 |       |       |
| Devon                         | 0.72  | 0.726 | 0.733 | 0.74  | 0.746 | 0.75  | 0.753 | 0.757 | 0.762 | 0.769 | 0.775 | 0.781 | 0.787 | 0.793 | 0.799 | 0.805 | 0.811 | 0.817 | 0.823 | 0.829 | 0.835 | 0.841 | 0.847 | 0.853 | 0.859 | 0.865 | 0.871 | 0.877 | 0.883 | 0.889 | 0.895 | 0.901 | 0.907 | 0.913 |       |
| Donet                         | 0.716 | 0.721 | 0.727 | 0.734 | 0.741 | 0.744 | 0.747 | 0.751 | 0.756 | 0.762 | 0.769 | 0.775 | 0.781 | 0.787 | 0.793 | 0.799 | 0.805 | 0.811 | 0.817 | 0.823 | 0.829 | 0.835 | 0.841 | 0.847 | 0.853 | 0.859 | 0.865 | 0.871 | 0.877 | 0.883 | 0.889 | 0.895 | 0.901 | 0.907 | 0.913 |
| Gloucestershire               | 0.735 | 0.741 | 0.747 | 0.754 | 0.761 | 0.765 | 0.768 | 0.772 | 0.777 | 0.783 | 0.789 | 0.795 | 0.801 | 0.807 | 0.813 | 0.819 | 0.825 | 0.831 | 0.837 | 0.843 | 0.849 | 0.855 | 0.861 | 0.867 | 0.873 | 0.879 | 0.885 | 0.891 | 0.897 | 0.903 | 0.909 | 0.915 | 0.921 | 0.927 |       |
| North Somerset                | 0.714 | 0.721 | 0.727 | 0.733 | 0.739 | 0.743 | 0.746 | 0.75  | 0.755 | 0.761 | 0.766 | 0.771 | 0.776 | 0.781 | 0.786 | 0.791 | 0.796 | 0.801 | 0.806 | 0.811 | 0.816 | 0.821 | 0.826 | 0.831 | 0.836 | 0.841 | 0.846 | 0.851 | 0.856 | 0.861 | 0.866 | 0.871 | 0.876 | 0.881 | 0.886 |
| Plymouth                      | 0.724 | 0.731 | 0.737 | 0.744 | 0.751 | 0.754 | 0.758 | 0.762 | 0.767 | 0.772 | 0.778 | 0.783 | 0.788 | 0.793 | 0.798 | 0.803 | 0.808 | 0.813 | 0.818 | 0.823 | 0.828 | 0.833 | 0.838 | 0.843 | 0.848 | 0.853 | 0.858 | 0.863 | 0.868 | 0.873 | 0.878 | 0.883 | 0.888 | 0.893 | 0.898 |
| Poole                         | 0.727 |       |       |       |       |       |       |       |       |       |       |       |       |       |       |       |       |       |       |       |       |       |       |       |       |       |       |       |       |       |       |       |       |       |       |



Appendix Table 11. Socio-demographic index values for all estimated GBD 2017 locations, 1990-2017

| Location                         | 1990  | 1991  | 1992  | 1993  | 1994  | 1995  | 1996  | 1997  | 1998  | 1999  | 2000  | 2001  | 2002  | 2003  | 2004  | 2005  | 2006  | 2007  | 2008  | 2009  | 2010  | 2011  | 2012  | 2013  | 2014  | 2015  | 2016  | 2017  |
|----------------------------------|-------|-------|-------|-------|-------|-------|-------|-------|-------|-------|-------|-------|-------|-------|-------|-------|-------|-------|-------|-------|-------|-------|-------|-------|-------|-------|-------|-------|
| Quintana Roo                     | 0.572 | 0.526 | 0.533 | 0.541 | 0.548 | 0.555 | 0.562 | 0.577 | 0.577 | 0.582 | 0.587 | 0.591 | 0.594 | 0.596 | 0.599 | 0.601 | 0.605 | 0.608 | 0.612 | 0.614 | 0.616 | 0.618 | 0.622 | 0.621 | 0.623 | 0.624 | 0.625 | 0.626 |
| San Luis Potosí                  | 0.482 | 0.514 | 0.522 | 0.531 | 0.538 | 0.545 | 0.552 | 0.559 | 0.566 | 0.573 | 0.579 | 0.585 | 0.591 | 0.596 | 0.601 | 0.606 | 0.611 | 0.616 | 0.621 | 0.626 | 0.631 | 0.636 | 0.641 | 0.646 | 0.651 | 0.656 | 0.661 | 0.666 |
| Sinaloa                          | 0.523 | 0.528 | 0.533 | 0.539 | 0.544 | 0.549 | 0.555 | 0.562 | 0.577 | 0.577 | 0.583 | 0.589 | 0.594 | 0.599 | 0.604 | 0.609 | 0.614 | 0.619 | 0.623 | 0.627 | 0.633 | 0.633 | 0.636 | 0.639 | 0.642 | 0.644 | 0.646 | 0.649 |
| Sonora                           | 0.553 | 0.557 | 0.562 | 0.566 | 0.571 | 0.573 | 0.578 | 0.583 | 0.588 | 0.593 | 0.597 | 0.601 | 0.605 | 0.608 | 0.612 | 0.616 | 0.621 | 0.625 | 0.629 | 0.632 | 0.635 | 0.637 | 0.64  | 0.643 | 0.645 | 0.647 | 0.649 | 0.65  |
| Tabasco                          | 0.474 | 0.477 | 0.486 | 0.493 | 0.5   | 0.507 | 0.515 | 0.524 | 0.533 | 0.541 | 0.548 | 0.553 | 0.558 | 0.563 | 0.568 | 0.573 | 0.578 | 0.583 | 0.588 | 0.591 | 0.594 | 0.596 | 0.599 | 0.602 | 0.604 | 0.607 | 0.609 | 0.611 |
| Tamaulipas                       | 0.548 | 0.553 | 0.558 | 0.564 | 0.568 | 0.571 | 0.574 | 0.579 | 0.586 | 0.592 | 0.598 | 0.602 | 0.606 | 0.609 | 0.613 | 0.616 | 0.62  | 0.624 | 0.628 | 0.631 | 0.633 | 0.635 | 0.637 | 0.64  | 0.642 | 0.643 | 0.645 | 0.647 |
| Tlaxcala                         | 0.478 | 0.482 | 0.487 | 0.495 | 0.506 | 0.515 | 0.524 | 0.531 | 0.536 | 0.541 | 0.547 | 0.55  | 0.556 | 0.561 | 0.567 | 0.571 | 0.578 | 0.583 | 0.587 | 0.591 | 0.594 | 0.596 | 0.598 | 0.6   | 0.601 | 0.603 | 0.604 | 0.604 |
| Venezuela de Ignacio de la Llave | 0.461 | 0.463 | 0.467 | 0.472 | 0.477 | 0.48  | 0.485 | 0.492 | 0.5   | 0.509 | 0.517 | 0.523 | 0.529 | 0.534 | 0.54  | 0.546 | 0.551 | 0.557 | 0.563 | 0.569 | 0.571 | 0.574 | 0.578 | 0.581 | 0.584 | 0.587 | 0.59  | 0.592 |
| Yucatán                          | 0.497 | 0.502 | 0.508 | 0.513 | 0.519 | 0.524 | 0.529 | 0.534 | 0.539 | 0.544 | 0.549 | 0.554 | 0.559 | 0.564 | 0.569 | 0.574 | 0.579 | 0.584 | 0.589 | 0.594 | 0.599 | 0.604 | 0.609 | 0.614 | 0.619 | 0.624 | 0.629 | 0.634 |
| Zacatecas                        | 0.483 | 0.489 | 0.495 | 0.502 | 0.509 | 0.514 | 0.52  | 0.527 | 0.534 | 0.54  | 0.546 | 0.551 | 0.556 | 0.56  | 0.564 | 0.568 | 0.572 | 0.577 | 0.581 | 0.584 | 0.586 | 0.589 | 0.592 | 0.595 | 0.598 | 0.602 | 0.605 | 0.608 |
| Nicaragua                        | 0.357 | 0.363 | 0.368 | 0.374 | 0.381 | 0.389 | 0.397 | 0.406 | 0.415 | 0.424 | 0.432 | 0.439 | 0.446 | 0.453 | 0.46  | 0.466 | 0.47  | 0.475 | 0.481 | 0.486 | 0.492 | 0.499 | 0.504 | 0.509 | 0.514 | 0.52  | 0.525 | 0.53  |
| Panamá                           | 0.542 | 0.546 | 0.55  | 0.555 | 0.56  | 0.565 | 0.569 | 0.573 | 0.578 | 0.583 | 0.589 | 0.595 | 0.6   | 0.604 | 0.608 | 0.611 | 0.614 | 0.618 | 0.622 | 0.626 | 0.63  | 0.635 | 0.641 | 0.646 | 0.656 | 0.664 | 0.671 | 0.677 |
| Venezuela                        | 0.528 | 0.536 | 0.543 | 0.55  | 0.558 | 0.566 | 0.574 | 0.582 | 0.591 | 0.597 | 0.602 | 0.608 | 0.614 | 0.62  | 0.626 | 0.631 | 0.636 | 0.641 | 0.646 | 0.651 | 0.656 | 0.661 | 0.666 | 0.671 | 0.676 | 0.681 | 0.685 | 0.689 |
| Tropical Latin America           | 0.494 | 0.5   | 0.507 | 0.514 | 0.521 | 0.529 | 0.537 | 0.544 | 0.55  | 0.556 | 0.561 | 0.566 | 0.571 | 0.577 | 0.582 | 0.588 | 0.594 | 0.601 | 0.608 | 0.614 | 0.621 | 0.628 | 0.635 | 0.642 | 0.648 | 0.654 | 0.659 | 0.662 |
| Brazil                           | 0.494 | 0.501 | 0.508 | 0.515 | 0.522 | 0.53  | 0.537 | 0.545 | 0.551 | 0.556 | 0.562 | 0.567 | 0.572 | 0.577 | 0.583 | 0.589 | 0.595 | 0.602 | 0.608 | 0.615 | 0.622 | 0.629 | 0.636 | 0.643 | 0.649 | 0.655 | 0.66  | 0.663 |
| Argentina                        | 0.397 | 0.398 | 0.402 | 0.406 | 0.41  | 0.415 | 0.42  | 0.425 | 0.43  | 0.435 | 0.44  | 0.445 | 0.45  | 0.455 | 0.46  | 0.465 | 0.47  | 0.475 | 0.48  | 0.485 | 0.49  | 0.495 | 0.5   | 0.505 | 0.51  | 0.515 | 0.52  | 0.525 |
| Algeria                          | 0.355 | 0.363 | 0.371 | 0.379 | 0.387 | 0.395 | 0.404 | 0.412 | 0.421 | 0.429 | 0.437 | 0.446 | 0.454 | 0.462 | 0.47  | 0.478 | 0.487 | 0.496 | 0.505 | 0.514 | 0.523 | 0.531 | 0.539 | 0.548 | 0.556 | 0.562 | 0.568 | 0.574 |
| Amepi                            | 0.467 | 0.473 | 0.483 | 0.491 | 0.5   | 0.508 | 0.517 | 0.526 | 0.534 | 0.54  | 0.546 | 0.552 | 0.558 | 0.564 | 0.57  | 0.576 | 0.583 | 0.591 | 0.598 | 0.605 | 0.613 | 0.621 | 0.629 | 0.636 | 0.643 | 0.65  | 0.655 | 0.659 |
| Amazonas                         | 0.438 | 0.447 | 0.457 | 0.466 | 0.475 | 0.483 | 0.492 | 0.499 | 0.505 | 0.51  | 0.514 | 0.519 | 0.523 | 0.528 | 0.533 | 0.539 | 0.546 | 0.553 | 0.561 | 0.568 | 0.577 | 0.585 | 0.594 | 0.602 | 0.611 | 0.618 | 0.625 | 0.629 |
| Bahia                            | 0.402 | 0.41  | 0.419 | 0.427 | 0.435 | 0.443 | 0.451 | 0.459 | 0.465 | 0.47  | 0.475 | 0.48  | 0.485 | 0.491 | 0.496 | 0.503 | 0.51  | 0.518 | 0.526 | 0.534 | 0.542 | 0.551 | 0.559 | 0.567 | 0.575 | 0.582 | 0.587 | 0.591 |
| Ceará                            | 0.411 | 0.419 | 0.426 | 0.433 | 0.44  | 0.448 | 0.455 | 0.463 | 0.469 | 0.475 | 0.48  | 0.486 | 0.492 | 0.498 | 0.505 | 0.512 | 0.52  | 0.528 | 0.536 | 0.544 | 0.553 | 0.561 | 0.569 | 0.577 | 0.584 | 0.591 | 0.596 | 0.6   |
| Distrito Federal                 | 0.63  | 0.636 | 0.642 | 0.649 | 0.656 | 0.663 | 0.671 | 0.679 | 0.685 | 0.691 | 0.696 | 0.702 | 0.707 | 0.713 | 0.719 | 0.725 | 0.731 | 0.738 | 0.744 | 0.751 | 0.756 | 0.763 | 0.769 | 0.775 | 0.78  | 0.785 | 0.79  | 0.792 |
| Espírito Santo                   | 0.466 | 0.47  | 0.476 | 0.482 | 0.487 | 0.493 | 0.499 | 0.505 | 0.511 | 0.517 | 0.523 | 0.529 | 0.535 | 0.541 | 0.547 | 0.553 | 0.559 | 0.565 | 0.571 | 0.577 | 0.583 | 0.589 | 0.595 | 0.601 | 0.607 | 0.613 | 0.619 | 0.625 |
| Goiás                            | 0.466 | 0.469 | 0.476 | 0.484 | 0.493 | 0.501 | 0.51  | 0.518 | 0.526 | 0.532 | 0.538 | 0.545 | 0.551 | 0.558 | 0.564 | 0.571 | 0.579 | 0.586 | 0.594 | 0.601 | 0.608 | 0.616 | 0.623 | 0.631 | 0.638 | 0.645 | 0.652 | 0.659 |
| Maranhão                         | 0.313 | 0.322 | 0.33  | 0.339 | 0.347 | 0.355 | 0.364 | 0.371 | 0.377 | 0.383 | 0.388 | 0.393 | 0.398 | 0.402 | 0.409 | 0.418 | 0.427 | 0.436 | 0.446 | 0.456 | 0.467 | 0.477 | 0.486 | 0.495 | 0.502 | 0.507 | 0.512 | 0.517 |
| Mato Grosso                      | 0.475 | 0.484 | 0.492 | 0.501 | 0.509 | 0.518 | 0.527 | 0.535 | 0.543 | 0.548 | 0.554 | 0.559 | 0.564 | 0.57  | 0.576 | 0.582 | 0.589 | 0.596 | 0.604 | 0.611 | 0.618 | 0.626 | 0.633 | 0.641 | 0.648 | 0.654 | 0.659 | 0.662 |
| Mato Grosso do Sul               | 0.465 | 0.473 | 0.481 | 0.489 | 0.497 | 0.506 | 0.515 | 0.523 | 0.531 | 0.537 | 0.543 | 0.549 | 0.555 | 0.56  | 0.566 | 0.573 | 0.58  | 0.587 | 0.594 | 0.6   | 0.607 | 0.614 | 0.622 | 0.629 | 0.636 | 0.642 | 0.647 | 0.65  |
| Minas Gerais                     | 0.491 | 0.498 | 0.506 | 0.513 | 0.521 | 0.53  | 0.538 | 0.545 | 0.551 | 0.557 | 0.562 | 0.567 | 0.573 | 0.579 | 0.585 | 0.591 | 0.598 | 0.604 | 0.611 | 0.618 | 0.624 | 0.631 | 0.637 | 0.643 | 0.649 | 0.654 | 0.658 | 0.661 |
| Piauí                            | 0.41  | 0.418 | 0.425 | 0.432 | 0.44  | 0.447 | 0.454 | 0.461 | 0.466 | 0.47  | 0.473 | 0.476 | 0.48  | 0.483 | 0.488 | 0.493 | 0.498 | 0.506 | 0.514 | 0.521 | 0.529 | 0.538 | 0.546 | 0.554 | 0.562 | 0.569 | 0.575 | 0.579 |
| Paraná                           | 0.399 | 0.406 | 0.413 | 0.42  | 0.427 | 0.434 | 0.441 | 0.447 | 0.453 | 0.457 | 0.461 | 0.465 | 0.469 | 0.474 | 0.48  | 0.486 | 0.491 | 0.497 | 0.503 | 0.509 | 0.517 | 0.526 | 0.535 | 0.543 | 0.551 | 0.559 | 0.567 | 0.574 |
| Paraná                           | 0.518 | 0.523 | 0.528 | 0.533 | 0.538 | 0.543 | 0.548 | 0.553 | 0.558 | 0.563 | 0.568 | 0.573 | 0.578 | 0.583 | 0.588 | 0.593 | 0.598 | 0.603 | 0.608 | 0.613 | 0.618 | 0.623 | 0.628 | 0.633 | 0.638 | 0.643 | 0.648 | 0.653 |
| Paraná                           | 0.399 | 0.406 | 0.413 | 0.42  | 0.427 | 0.434 | 0.441 | 0.447 | 0.453 | 0.457 | 0.461 | 0.465 | 0.469 | 0.474 | 0.48  | 0.486 | 0.491 | 0.497 | 0.503 | 0.509 | 0.517 | 0.526 | 0.535 | 0.543 | 0.551 | 0.559 | 0.567 | 0.574 |
| Paraná                           | 0.518 | 0.523 | 0.528 | 0.533 | 0.538 | 0.543 | 0.548 | 0.553 | 0.558 | 0.563 | 0.568 | 0.573 | 0.578 | 0.583 | 0.588 | 0.593 | 0.598 | 0.603 | 0.608 | 0.613 | 0.618 | 0.623 | 0.628 | 0.633 | 0.638 | 0.643 | 0.648 | 0.653 |
| Paraná                           | 0.399 | 0.406 | 0.413 | 0.42  | 0.427 | 0.434 | 0.441 | 0.447 | 0.453 | 0.457 | 0.461 | 0.465 | 0.469 | 0.474 | 0.48  | 0.486 | 0.491 | 0.497 | 0.503 | 0.509 | 0.517 | 0.526 | 0.535 | 0.543 | 0.551 | 0.559 | 0.567 | 0.574 |
| Paraná                           | 0.518 | 0.523 | 0.528 | 0.533 | 0.538 | 0.543 | 0.548 | 0.553 | 0.558 | 0.563 | 0.568 | 0.573 | 0.578 | 0.583 | 0.588 | 0.593 | 0.598 | 0.603 | 0.608 | 0.613 | 0.618 | 0.623 | 0.628 | 0.633 | 0.638 | 0.643 | 0.648 | 0.653 |
| Paraná                           | 0.399 | 0.406 | 0.413 | 0.42  | 0.427 | 0.434 | 0.441 | 0.447 | 0.453 | 0.457 | 0.461 | 0.465 | 0.469 | 0.474 | 0.48  | 0.486 | 0.491 | 0.497 | 0.503 | 0.509 | 0.517 | 0.526 | 0.535 | 0.543 | 0.551 | 0.559 | 0.567 | 0.574 |
| Paraná                           | 0.518 | 0.523 | 0.528 | 0.533 | 0.538 | 0.543 | 0.548 | 0.553 | 0.558 | 0.563 | 0.568 | 0.573 | 0.578 | 0.583 | 0.588 | 0.593 | 0.598 | 0.603 | 0.608 | 0.613 | 0.618 | 0.623 | 0.628 | 0.633 | 0.638 | 0.643 | 0.648 | 0.653 |
| Paraná                           | 0.399 | 0.406 | 0.413 | 0.42  | 0.427 | 0.434 | 0.441 | 0.4   |       |       |       |       |       |       |       |       |       |       |       |       |       |       |       |       |       |       |       |       |

Appendix Table 11. Socio-demographic Index values for all estimated GBD 2017 locations, 1990-2017

| Location                   | 1990  | 1991  | 1992  | 1993  | 1994  | 1995  | 1996  | 1997  | 1998  | 1999  | 2000  | 2001  | 2002  | 2003  | 2004  | 2005  | 2006  | 2007  | 2008  | 2009  | 2010  | 2011  | 2012  | 2013  | 2014  | 2015  | 2016  | 2017  |       |
|----------------------------|-------|-------|-------|-------|-------|-------|-------|-------|-------|-------|-------|-------|-------|-------|-------|-------|-------|-------|-------|-------|-------|-------|-------|-------|-------|-------|-------|-------|-------|
| Philippines                | 0.511 | 0.516 | 0.521 | 0.525 | 0.531 | 0.534 | 0.539 | 0.542 | 0.545 | 0.547 | 0.55  | 0.553 | 0.555 | 0.557 | 0.559 | 0.561 | 0.563 | 0.566 | 0.568 | 0.569 | 0.572 | 0.579 | 0.586 | 0.593 | 0.599 | 0.605 | 0.612 | 0.617 |       |
| Si Lanka                   | 0.49  | 0.495 | 0.501 | 0.508 | 0.516 | 0.524 | 0.532 | 0.54  | 0.547 | 0.552 | 0.556 | 0.561 | 0.565 | 0.57  | 0.574 | 0.579 | 0.584 | 0.589 | 0.594 | 0.599 | 0.604 | 0.61  | 0.616 | 0.621 | 0.626 | 0.631 | 0.636 | 0.641 | 0.646 |
| Seychelles                 | 0.549 | 0.557 | 0.565 | 0.573 | 0.582 | 0.589 | 0.597 | 0.605 | 0.613 | 0.62  | 0.626 | 0.631 | 0.636 | 0.64  | 0.643 | 0.646 | 0.65  | 0.653 | 0.656 | 0.658 | 0.66  | 0.663 | 0.667 | 0.671 | 0.675 | 0.68  | 0.686 | 0.692 |       |
| Thailand                   | 0.502 | 0.514 | 0.525 | 0.534 | 0.542 | 0.551 | 0.56  | 0.569 | 0.572 | 0.579 | 0.587 | 0.594 | 0.6   | 0.605 | 0.61  | 0.616 | 0.623 | 0.629 | 0.635 | 0.641 | 0.647 | 0.654 | 0.661 | 0.667 | 0.673 | 0.679 | 0.684 | 0.689 |       |
| Timor-Leste                | 0.276 | 0.283 | 0.29  | 0.296 | 0.302 | 0.307 | 0.314 | 0.321 | 0.325 | 0.321 | 0.32  | 0.325 | 0.332 | 0.345 | 0.362 | 0.379 | 0.4   | 0.419 | 0.437 | 0.449 | 0.46  | 0.471 | 0.481 | 0.49  | 0.495 | 0.5   | 0.504 | 0.505 |       |
| Vietnam                    | 0.406 | 0.413 | 0.42  | 0.427 | 0.435 | 0.444 | 0.452 | 0.461 | 0.469 | 0.477 | 0.483 | 0.49  | 0.497 | 0.504 | 0.511 | 0.518 | 0.525 | 0.532 | 0.54  | 0.547 | 0.554 | 0.562 | 0.57  | 0.578 | 0.585 | 0.593 | 0.6   | 0.607 |       |
| Sub-Saharan Africa         | 0.304 | 0.307 | 0.311 | 0.314 | 0.317 | 0.32  | 0.324 | 0.328 | 0.332 | 0.335 | 0.339 | 0.343 | 0.348 | 0.353 | 0.359 | 0.365 | 0.371 | 0.379 | 0.386 | 0.393 | 0.4   | 0.407 | 0.414 | 0.421 | 0.428 | 0.435 | 0.441 | 0.446 |       |
| Central sub-Saharan Africa | 0.298 | 0.301 | 0.307 | 0.309 | 0.311 | 0.313 | 0.316 | 0.318 | 0.32  | 0.323 | 0.325 | 0.328 | 0.332 | 0.336 | 0.341 | 0.348 | 0.355 | 0.364 | 0.373 | 0.382 | 0.391 | 0.402 | 0.413 | 0.423 | 0.433 | 0.443 | 0.452 | 0.457 |       |
| Angola                     | 0.235 | 0.241 | 0.245 | 0.249 | 0.253 | 0.258 | 0.263 | 0.269 | 0.274 | 0.279 | 0.283 | 0.289 | 0.295 | 0.301 | 0.31  | 0.32  | 0.329 | 0.34  | 0.351 | 0.363 | 0.38  | 0.401 | 0.415 | 0.43  | 0.445 | 0.461 | 0.478 | 0.496 |       |
| Central African Republic   | 0.22  | 0.225 | 0.228 | 0.232 | 0.236 | 0.24  | 0.242 | 0.245 | 0.249 | 0.254 | 0.257 | 0.261 | 0.266 | 0.271 | 0.275 | 0.28  | 0.285 | 0.29  | 0.296 | 0.304 | 0.313 | 0.323 | 0.335 | 0.348 | 0.363 | 0.38  | 0.403 | 0.434 |       |
| Congo (Brazzaville)        | 0.382 | 0.39  | 0.398 | 0.405 | 0.41  | 0.416 | 0.421 | 0.426 | 0.431 | 0.434 | 0.439 | 0.444 | 0.449 | 0.455 | 0.46  | 0.467 | 0.475 | 0.482 | 0.49  | 0.499 | 0.509 | 0.52  | 0.531 | 0.542 | 0.552 | 0.561 | 0.569 | 0.574 |       |
| DR Congo                   | 0.293 | 0.296 | 0.298 | 0.298 | 0.296 | 0.294 | 0.291 | 0.288 | 0.283 | 0.279 | 0.274 | 0.269 | 0.263 | 0.263 | 0.262 | 0.264 | 0.264 | 0.265 | 0.267 | 0.27  | 0.278 | 0.288 | 0.3   | 0.315 | 0.33  | 0.344 | 0.356 | 0.364 |       |
| Equatorial Guinea          | 0.2   | 0.204 | 0.212 | 0.22  | 0.229 | 0.241 | 0.26  | 0.292 | 0.316 | 0.339 | 0.363 | 0.388 | 0.41  | 0.429 | 0.449 | 0.467 | 0.483 | 0.499 | 0.516 | 0.537 | 0.587 | 0.599 | 0.61  | 0.62  | 0.625 | 0.63  | 0.634 | 0.641 |       |
| Gabon                      | 0.433 | 0.443 | 0.453 | 0.462 | 0.472 | 0.481 | 0.49  | 0.498 | 0.506 | 0.514 | 0.522 | 0.529 | 0.535 | 0.542 | 0.549 | 0.556 | 0.562 | 0.569 | 0.576 | 0.582 | 0.589 | 0.598 | 0.607 | 0.616 | 0.625 | 0.634 | 0.641 | 0.651 |       |
| Eastern sub-Saharan Africa | 0.23  | 0.233 | 0.236 | 0.239 | 0.241 | 0.245 | 0.249 | 0.254 | 0.259 | 0.262 | 0.266 | 0.271 | 0.276 | 0.282 | 0.288 | 0.294 | 0.301 | 0.308 | 0.316 | 0.324 | 0.332 | 0.34  | 0.348 | 0.356 | 0.365 | 0.373 | 0.381 | 0.387 |       |
| Burundi                    | 0.237 | 0.242 | 0.247 | 0.253 | 0.259 | 0.265 | 0.269 | 0.274 | 0.279 | 0.283 | 0.288 | 0.293 | 0.298 | 0.303 | 0.31  | 0.317 | 0.324 | 0.331 | 0.338 | 0.345 | 0.352 | 0.36  | 0.368 | 0.376 | 0.384 | 0.392 | 0.4   | 0.408 |       |
| Comoros                    | 0.272 | 0.279 | 0.286 | 0.293 | 0.298 | 0.303 | 0.308 | 0.313 | 0.318 | 0.323 | 0.328 | 0.333 | 0.338 | 0.344 | 0.351 | 0.358 | 0.365 | 0.372 | 0.378 | 0.384 | 0.39  | 0.396 | 0.403 | 0.411 | 0.417 | 0.423 | 0.429 | 0.434 |       |
| Djibouti                   | 0.313 | 0.317 | 0.322 | 0.327 | 0.332 | 0.337 | 0.342 | 0.347 | 0.352 | 0.357 | 0.362 | 0.367 | 0.372 | 0.377 | 0.382 | 0.387 | 0.392 | 0.397 | 0.402 | 0.407 | 0.412 | 0.417 | 0.422 | 0.427 | 0.432 | 0.437 | 0.442 | 0.447 |       |
| Eritrea                    | 0.202 | 0.214 | 0.223 | 0.234 | 0.247 | 0.26  | 0.272 | 0.285 | 0.296 | 0.306 | 0.315 | 0.323 | 0.331 | 0.337 | 0.343 | 0.348 | 0.353 | 0.357 | 0.36  | 0.364 | 0.368 | 0.372 | 0.378 | 0.383 | 0.39  | 0.396 | 0.403 | 0.409 |       |
| Ethiopia                   | 0.138 | 0.141 | 0.143 | 0.146 | 0.148 | 0.15  | 0.155 | 0.161 | 0.166 | 0.169 | 0.172 | 0.177 | 0.183 | 0.189 | 0.195 | 0.202 | 0.21  | 0.221 | 0.233 | 0.245 | 0.257 | 0.268 | 0.28  | 0.292 | 0.304 | 0.314 | 0.325 | 0.334 |       |
| Kenya                      | 0.341 | 0.349 | 0.357 | 0.364 | 0.372 | 0.377 | 0.382 | 0.387 | 0.392 | 0.398 | 0.401 | 0.403 | 0.406 | 0.411 | 0.416 | 0.42  | 0.425 | 0.432 | 0.438 | 0.445 | 0.452 | 0.459 | 0.465 | 0.473 | 0.481 | 0.488 | 0.494 | 0.499 |       |
| Rwanda                     | 0.254 | 0.26  | 0.27  | 0.28  | 0.29  | 0.307 | 0.313 | 0.319 | 0.326 | 0.333 | 0.338 | 0.341 | 0.345 | 0.352 | 0.358 | 0.362 | 0.366 | 0.37  | 0.374 | 0.38  | 0.39  | 0.401 | 0.408 | 0.414 | 0.421 | 0.428 | 0.434 | 0.439 |       |
| Tanzania                   | 0.286 | 0.291 | 0.296 | 0.301 | 0.306 | 0.311 | 0.316 | 0.321 | 0.326 | 0.331 | 0.336 | 0.341 | 0.346 | 0.351 | 0.356 | 0.361 | 0.366 | 0.371 | 0.376 | 0.381 | 0.386 | 0.391 | 0.396 | 0.401 | 0.406 | 0.411 | 0.416 | 0.421 |       |
| Burkina Faso               | 0.216 | 0.225 | 0.233 | 0.241 | 0.248 | 0.253 | 0.257 | 0.26  | 0.265 | 0.27  | 0.273 | 0.277 | 0.281 | 0.284 | 0.287 | 0.291 | 0.294 | 0.297 | 0.301 | 0.304 | 0.307 | 0.311 | 0.315 | 0.319 | 0.323 | 0.327 | 0.331 | 0.334 |       |
| Benin                      | 0.297 | 0.304 | 0.312 | 0.32  | 0.327 | 0.332 | 0.336 | 0.339 | 0.344 | 0.349 | 0.352 | 0.355 | 0.358 | 0.361 | 0.365 | 0.37  | 0.375 | 0.381 | 0.386 | 0.393 | 0.4   | 0.404 | 0.409 | 0.414 | 0.419 | 0.424 | 0.429 | 0.434 |       |
| Elgeyo Marakwet            | 0.292 | 0.302 | 0.312 | 0.321 | 0.329 | 0.336 | 0.342 | 0.348 | 0.355 | 0.362 | 0.368 | 0.372 | 0.378 | 0.386 | 0.394 | 0.4   | 0.408 | 0.417 | 0.425 | 0.435 | 0.443 | 0.451 | 0.458 | 0.467 | 0.475 | 0.483 | 0.49  | 0.496 |       |
| Embu                       | 0.375 | 0.384 | 0.393 | 0.4   | 0.407 | 0.413 | 0.417 | 0.422 | 0.427 | 0.431 | 0.434 | 0.437 | 0.44  | 0.444 | 0.449 | 0.452 | 0.456 | 0.46  | 0.464 | 0.47  | 0.478 | 0.486 | 0.493 | 0.499 | 0.507 | 0.514 | 0.521 | 0.527 |       |
| Garissa                    | 0.153 | 0.16  | 0.168 | 0.177 | 0.184 | 0.19  | 0.195 | 0.201 | 0.207 | 0.213 | 0.219 | 0.223 | 0.228 | 0.233 | 0.237 | 0.242 | 0.249 | 0.255 | 0.263 | 0.272 | 0.28  | 0.288 | 0.298 | 0.309 | 0.318 | 0.326 | 0.334 |       |       |
| Hoima Bay                  | 0.214 | 0.222 | 0.232 | 0.243 | 0.253 | 0.26  | 0.265 | 0.271 | 0.279 | 0.288 | 0.292 | 0.293 | 0.297 | 0.305 | 0.313 | 0.319 | 0.328 | 0.338 | 0.346 | 0.356 | 0.366 | 0.374 | 0.382 | 0.392 | 0.403 | 0.411 | 0.419 | 0.425 |       |
| Isiolo                     | 0.204 | 0.21  | 0.216 | 0.222 | 0.228 | 0.232 | 0.236 | 0.24  | 0.244 | 0.248 | 0.252 | 0.256 | 0.26  | 0.264 | 0.268 | 0.272 | 0.276 | 0.28  | 0.284 | 0.288 | 0.292 | 0.296 | 0.3   | 0.304 | 0.308 | 0.312 | 0.316 | 0.32  |       |
| Kajiado                    | 0.184 | 0.19  | 0.196 | 0.202 | 0.208 | 0.214 | 0.22  | 0.226 | 0.232 | 0.238 | 0.244 | 0.249 | 0.254 | 0.259 | 0.264 | 0.269 | 0.274 | 0.279 | 0.284 | 0.289 | 0.294 | 0.299 | 0.304 | 0.309 | 0.314 | 0.319 | 0.324 | 0.329 |       |
| Kakamega                   | 0.295 | 0.303 | 0.311 | 0.319 | 0.326 | 0.332 | 0.337 | 0.342 | 0.348 | 0.356 | 0.36  | 0.365 | 0.37  | 0.375 | 0.378 | 0.383 | 0.389 | 0.394 | 0.4   | 0.407 | 0.412 | 0.417 | 0.423 | 0.429 | 0.435 | 0.441 | 0.447 |       |       |
| Kericho                    | 0.266 | 0.277 | 0.288 | 0.299 | 0.309 | 0.317 | 0.324 | 0.331 | 0.339 | 0.348 | 0.353 | 0.356 | 0.362 | 0.37  | 0.378 | 0.385 | 0.394 | 0.404 | 0.414 | 0.425 | 0.436 | 0.445 | 0.454 | 0.464 | 0.475 | 0.485 | 0.493 |       |       |
| Kiambu                     | 0.435 | 0.443 | 0.45  | 0.457 | 0.464 | 0.469 | 0.473 | 0.476 | 0.48  | 0.484 | 0.487 | 0.49  | 0.492 | 0.496 | 0.5   | 0.504 | 0.508 | 0.512 | 0.516 | 0.521 | 0.525 | 0.53  | 0.535 | 0.541 | 0.548 | 0.556 | 0.563 |       |       |
| Kilifi                     | 0.292 | 0.3   | 0.307 | 0.314 | 0.321 | 0.327 | 0.331 | 0.336 | 0.34  | 0.346 | 0.348 | 0.349 | 0.352 | 0.357 | 0.361 | 0.365 | 0.371 | 0.378 | 0.385 | 0.392 | 0.4   | 0.408 | 0.415 | 0.424 | 0.434 | 0.442 | 0.45  |       |       |
| Kirinyaga                  | 0.389 | 0.396 | 0.402 | 0.407 | 0.411 | 0.415 | 0.418 | 0.422 | 0.425 | 0.429 | 0.432 | 0.434 | 0.437 | 0.442 | 0.447 | 0.451 | 0.457 | 0.464 | 0.471 | 0.479 | 0.486 | 0.493 | 0.5   | 0.507 | 0.514 | 0.521 | 0.527 |       |       |
| Kisii                      | 0.34  | 0.35  | 0.36  | 0.368 | 0.377 | 0.383 | 0.389 | 0.395 | 0.401 | 0.407 | 0.411 | 0.414 | 0.418 | 0.424 | 0.429 | 0.434 | 0.44  | 0.448 | 0.454 | 0.46  | 0.471 | 0.479 | 0.486 | 0.495 | 0.503 | 0.511 | 0.517 |       |       |
| Kisumu                     | 0.314 | 0.325 | 0.334 | 0.342 | 0.349 | 0.356 | 0.364 | 0.37  | 0.376 | 0.381 | 0.384 | 0.389 | 0.394 | 0.399 | 0.404 | 0.409 | 0.414 | 0.419 | 0.424 | 0.    |       |       |       |       |       |       |       |       |       |

**Appendix Table 12. GBD world population age standard**

| <b>Age group</b> | <b>Percent of Population</b> | <b>Rounded</b> |
|------------------|------------------------------|----------------|
| ENN              | 0.040802107                  | 0.04           |
| LNN              | 0.121276112                  | 0.12           |
| PNN              | 1.916163425                  | 1.92           |
| 0-1              | 2.078241644                  | 2.08           |
| 1-4              | 8.102445249                  | 8.1            |
| 5-9              | 9.677325318                  | 9.68           |
| 10-14            | 8.952609678                  | 8.95           |
| 15-19            | 8.382858071                  | 8.38           |
| 20-24            | 8.01707612                   | 8.02           |
| 25-29            | 7.778732811                  | 7.78           |
| 30-34            | 7.331586983                  | 7.33           |
| 35-39            | 6.775951151                  | 6.78           |
| 40-44            | 6.089034035                  | 6.09           |
| 45-49            | 5.465811837                  | 5.47           |
| 50-54            | 4.873621621                  | 4.87           |
| 55-59            | 4.251640217                  | 4.25           |
| 60-64            | 3.5961672                    | 3.6            |
| 65-69            | 2.914902912                  | 2.91           |
| 70-74            | 2.130279933                  | 2.13           |
| 75-79            | 1.608333391                  | 1.61           |
| 80-84            | 1.078423497                  | 1.08           |
| 85-89            | 0.603162091                  | 0.6            |
| 90-94            | 0.234261019                  | 0.23           |
| 95+              | 0.057535221                  | 0.06           |

**Appendix Table 13. New data sources added for GBD 2017 mortality estimation**

| Location               | Year      | Source                                                                                 |
|------------------------|-----------|----------------------------------------------------------------------------------------|
| Armenia                | 2016-2016 | Armenia Vital Registration - Deaths 2016 ICD10                                         |
| Azerbaijan             | 2014-2016 | Azerbaijan Demographic Indicators 2017                                                 |
| Georgia                | 2015-2015 | Georgia Vital Registration - Deaths 2015 ICD10                                         |
| Georgia                | 2016-2016 | Georgia Deaths by Age, Year and Sex 2002-2016                                          |
| Kyrgyzstan             | 2016-2016 | United Nations Demographic Yearbook                                                    |
| Tajikistan             | 2014-2014 | United Nations Demographic Yearbook                                                    |
| Tajikistan             | 2016-2016 | Tajikistan Vital Registration - Deaths 2016 ICD10                                      |
| Tajikistan             | 2017-2017 | Tajikistan Demographic and Health Survey 2017                                          |
| Turkmenistan           | 2015-2015 | Turkmenistan Vital Registration - Deaths 2015 ICD10                                    |
| Turkmenistan           | 2015-2016 | Turkmenistan Multiple Indicator Cluster Survey 2015-2016                               |
| Bosnia and Herzegovina | 2013-2013 | Bosnia and Herzegovina Demography and Social Statistics 2016                           |
| Bosnia and Herzegovina | 2015-2016 | Bosnia and Herzegovina Demography and Social Statistics 2016                           |
| Bulgaria               | 2014-2014 | Bulgaria Vital Registration - Deaths 2014 ICD10                                        |
| Bulgaria               | 2015-2016 | Bulgaria Deaths by Age (5-year Age Group), Residence, Sex and Districts                |
| Croatia                | 2015-2015 | Croatia Vital Registration - Deaths 2015 ICD10                                         |
| Croatia                | 2016-2016 | Croatia Vital Registration - Deaths 2016 ICD10                                         |
| Czech Republic         | 2016-2016 | Czech Republic Vital Registration - Deaths 2016 ICD10                                  |
| Hungary                | 2016-2016 | Hungary Vital Registration - Deaths 2016 ICD10                                         |
| Macedonia              | 2014-2014 | United Nations Demographic Yearbook                                                    |
| Macedonia              | 2015-2016 | Macedonia Deaths by Cause of Death, by Sex and Age, Short List - 65                    |
| Montenegro             | 1971-1971 | Montenegro Deaths by Age and Sex 1961-2016                                             |
| Montenegro             | 1981-1981 | Montenegro Deaths by Age and Sex 1961-2016                                             |
| Montenegro             | 1991-1991 | Montenegro Deaths by Age and Sex 1961-2016                                             |
| Montenegro             | 2014-2016 | Montenegro Deaths by Age and Sex 1961-2016                                             |
| Poland                 | 2015-2015 | Poland Vital Registration - Deaths 2015 ICD10                                          |
| Poland                 | 2016-2016 | Poland Deaths by Sex and Age                                                           |
| Romania                | 2016-2016 | Romania Vital Registration - Deaths 2016 ICD10                                         |
| Serbia                 | 2015-2016 | Serbia Deaths by Causes of Death, Sex, and Age                                         |
| Slovakia               | 2015-2016 | Slovakia Deaths by Age and Sex - SR, Areas, Regions, Districts, Urban, Rural           |
| Slovenia               | 1980-1981 | Slovenia Deaths by Age and Sex, Annually                                               |
| Slovenia               | 2016-2016 | Slovenia Deaths by Age and Sex, Cohesion Regions, Annually                             |
| Belarus                | 2015-2016 | Belarus Deaths by Region and Age                                                       |
| Estonia                | 2015-2015 | Estonia Vital Registration - Deaths 2015 ICD10                                         |
| Latvia                 | 2015-2015 | Latvia Vital Registration - Deaths 2015 ICD10                                          |
| Latvia                 | 2016-2016 | United Nations Demographic Yearbook                                                    |
| Lithuania              | 2016-2016 | Lithuania Vital Registration - Deaths 2016 ICD10                                       |
| Moldova                | 1980-1980 | Moldova Deceased by Age Groups, Years, and Genders 1980-2016                           |
| Moldova                | 1983-1984 | Moldova Deceased by Age Groups, Years, and Genders 1980-2016                           |
| Moldova                | 2016-2016 | Moldova Deceased by Age Groups, Years, and Genders 1980-2016                           |
| Ukraine                | 2015-2015 | Ukraine Vital Registration - Deaths 2015                                               |
| Ukraine                | 2016-2016 | Ukraine Vital Registration - Deaths 2016                                               |
| Australia              | 2015-2015 | Australia Vital Registration - Deaths 2015 ICD10                                       |
| New Zealand            | 2015-2016 | New Zealand Deaths by age and sex (Total population)                                   |
| Brunei                 | 2015-2015 | Brunei Vital Registration - Deaths 2015 ICD10                                          |
| South Korea            | 2014-2014 | South Korea Vital Registration - Deaths 2014 ICD10                                     |
| South Korea            | 2015-2015 | South Korea Vital Registration - Deaths 2015 ICD10                                     |
| South Korea            | 2016-2016 | South Korea KOSIS Database - Deaths by Age and Sex: Province                           |
| Greenland              | 2016-2016 | United Nations Demographic Yearbook                                                    |
| USA                    | 2016-2016 | United States NVSS Mortality Data 2016                                                 |
| Argentina              | 2015-2015 | Argentina Vital Registration - Deaths 2015 ICD10                                       |
| Chile                  | 2015-2015 | Chile Vital Registration - Deaths 2015 ICD10                                           |
| Uruguay                | 2011-2011 | Uruguay Census 2011 - IPUMS                                                            |
| Uruguay                | 2015-2015 | Uruguay Vital Registration - Deaths 2015 ICD10                                         |
| Andorra                | 2015-2015 | United Nations Demographic Yearbook                                                    |
| Austria                | 2015-2015 | Austria Vital Registration - Deaths 2015 ICD10                                         |
| Austria                | 2016-2016 | Austria Vital Registration - Deaths 2016 ICD10                                         |
| Belgium                | 2015-2015 | Belgium Vital Registration - Deaths 2015 ICD10                                         |
| Belgium                | 2016-2016 | Belgium Mortality Tables: In Exact Age 1994-2016                                       |
| Cyprus                 | 2015-2015 | Cyprus Vital Registration - Deaths 2015 ICD10                                          |
| Cyprus                 | 2016-2016 | Cyprus Vital Registration - Deaths 2016 ICD10                                          |
| Denmark                | 2015-2015 | Denmark Vital Registration - Deaths 2015 ICD10                                         |
| Denmark                | 2016-2016 | Denmark Deaths by Sex and Age                                                          |
| Finland                | 2016-2016 | Finland Deaths by Age (1 Year) and Sex                                                 |
| France                 | 2015-2015 | France Births, Deaths and Marriages in 2015 - Deaths                                   |
| France                 | 2016-2016 | France Births, Deaths and Marriages in 2016 - Deaths                                   |
| Germany                | 2015-2015 | Germany Vital Registration - Deaths 2015 ICD10                                         |
| Greece                 | 2015-2016 | Greece Deaths by Sex and Age of the Deceased 2000-2016                                 |
| Iceland                | 2016-2016 | Iceland Vital Registration - Deaths 2016 ICD10                                         |
| Ireland                | 2015-2016 | Ireland Deaths Occurring by Area of Residence, Sex, Age at Death and Year              |
| Israel                 | 2015-2015 | Israel Vital Registration - Deaths 2015 ICD10                                          |
| Israel                 | 2016-2016 | United Nations Demographic Yearbook                                                    |
| Italy                  | 2014-2014 | Italy Vital Registration - Deaths 2014 ICD10                                           |
| Italy                  | 2015-2015 | Italy Deaths and Specific Mortality Rates by Age and Year, all Geographical Areas 2015 |
| Italy                  | 2016-2016 | Italy Deaths and Specific Mortality Rates by Age and Year, all Geographical Areas 2016 |
| Luxembourg             | 2015-2015 | Luxembourg Vital Registration - Deaths 2015 ICD10                                      |
| Malta                  | 2015-2015 | Malta Vital Registration - Deaths 2015 ICD10                                           |
| Malta                  | 2016-2016 | United Nations Demographic Yearbook                                                    |
| Netherlands            | 2016-2016 | Netherlands Vital Registration - Deaths 2016 ICD10                                     |
| Portugal               | 2004-2004 | Portugal Vital Registration - Deaths 2004                                              |
| Portugal               | 2015-2016 | Portugal Deaths by Place of Residence, Sex and Age Annual                              |
| Spain                  | 2015-2015 | Spain Vital Registration - Deaths 2015 ICD10                                           |
| Spain                  | 2016-2016 | Spain Deaths by Age, Month, and Sex 2016                                               |
| Sweden                 | 2015-2015 | Sweden Cause of Death Register 2015                                                    |
| Sweden                 | 2016-2016 | Sweden Cause of Death Register 2016                                                    |

**Appendix Table 13. New data sources added for GBD 2017 mortality estimation**

| Location            | Year      | Source                                                                                                                                                             |
|---------------------|-----------|--------------------------------------------------------------------------------------------------------------------------------------------------------------------|
| Switzerland         | 2015-2015 | Switzerland Deaths by Municipality, Sex, and Age Group, 2015-2016                                                                                                  |
| Switzerland         | 2016-2016 | Switzerland Permanent and Non-permanent Resident Population by Sex and Age                                                                                         |
| United Kingdom      | 2016-2016 | United Kingdom - Scotland Vital Events Reference Tables 2016                                                                                                       |
| Bolivia             | 1991-1991 | Bolivia Population Estimates 1991                                                                                                                                  |
| Bolivia             | 2016-2016 | Bolivia Demographic and Health Survey 2016                                                                                                                         |
| Ecuador             | 2015-2015 | Ecuador Vital Registration - Deaths 2015 ICD10                                                                                                                     |
| Ecuador             | 2016-2016 | Ecuador General Deaths 2016                                                                                                                                        |
| Peru                | 2015-2015 | Peru Vital Registration - Deaths 2015 ICD10                                                                                                                        |
| Peru                | 2015-2015 | Peru Demographic and Family Health Survey 2015                                                                                                                     |
| Peru                | 2016-2016 | Peru Demographic and Family Health Survey 2016                                                                                                                     |
| Antigua and Barbuda | 2015-2015 | Antigua and Barbuda Vital Registration - Deaths 2015 ICD10                                                                                                         |
| Belize              | 1981-1981 | United Nations Demographic Yearbook - Historical Supplement 1997                                                                                                   |
| Belize              | 2015-2015 | Belize Vital Registration - Deaths 2015 ICD10                                                                                                                      |
| Belize              | 2015-2016 | Belize Multiple Indicator Cluster Survey 2015-2016                                                                                                                 |
| Belize              | 2016-2016 | United Nations Demographic Yearbook                                                                                                                                |
| Cuba                | 2015-2015 | Cuba Vital Registration - Deaths 2015 ICD10                                                                                                                        |
| Dominica            | 2015-2015 | Dominica Vital Registration - Deaths 2015 ICD10                                                                                                                    |
| Dominican Republic  | 1999-1999 | Dominican Republic Demographic and Health Survey 1999                                                                                                              |
| Dominican Republic  | 2007-2007 | Dominican Republic Special Demographic and Health Survey 2007                                                                                                      |
| Dominican Republic  | 2014-2014 | Dominican Republic Births Occurred per Year, by Sex and Province of Birth, 2001-2016                                                                               |
| Dominican Republic  | 2015-2015 | Dominican Republic Births Occurring by Age Groups of the Mother at the Time of the Birth of the Child, According to the Year of Occurrence of the Birth, 2001-2016 |
| Dominican Republic  | 2016-2016 | Dominican Republic Deaths Occurred per Year, by Sex and Age Groups of the Deceased, 2001-2016                                                                      |
| Grenada             | 2016-2016 | Grenada Vital Registration - Deaths 2016 ICD10                                                                                                                     |
| Guyana              | 2013-2013 | Guyana Vital Registration - Deaths 2013 ICD10                                                                                                                      |
| Haiti               | 2016-2017 | Haiti Demographic and Health Survey 2016-2017                                                                                                                      |
| Jamaica             | 2000-2000 | Jamaica Multiple Indicator Cluster Survey 2000                                                                                                                     |
| Jamaica             | 2011-2011 | Jamaica Population and Housing Census 2011                                                                                                                         |
| Puerto Rico         | 2016-2016 | United Nations Demographic Yearbook                                                                                                                                |
| Suriname            | 2015-2015 | United Nations Demographic Yearbook                                                                                                                                |
| Trinidad and Tobago | 2011-2011 | Trinidad and Tobago Vital Registration - Deaths 2011 ICD10                                                                                                         |
| Colombia            | 2008-2008 | Colombia National Quality of Life Survey 2008                                                                                                                      |
| Colombia            | 2014-2014 | Colombia Vital Registration - Deaths 2014 ICD10                                                                                                                    |
| Colombia            | 2015-2015 | Colombia Vital Registration - Deaths 2015 ICD10                                                                                                                    |
| Colombia            | 2015-2016 | Colombia Demographic and Health Survey 2015-2016                                                                                                                   |
| Costa Rica          | 2015-2015 | Costa Rica Total Deaths by Age Groups, by Province of Residence and Sex 2015                                                                                       |
| Costa Rica          | 2016-2016 | Costa Rica Infant, Neonatal and Fetal Death Statistics. Preliminary Data 2016                                                                                      |
| El Salvador         | 2014-2014 | El Salvador Vital Registration - Deaths 2014 ICD10                                                                                                                 |
| Guatemala           | 2015-2015 | Guatemala Vital Registration - Deaths 2015 ICD10                                                                                                                   |
| Mexico              | 2010-2010 | Mexico Population and Housing Census 2010 - IPUMS                                                                                                                  |
| Mexico              | 2015-2015 | Mexico Intercensal Survey 2015 - IPUMS                                                                                                                             |
| Mexico              | 2015-2015 | Mexico Multiple Indicator Cluster Survey 2015                                                                                                                      |
| Mexico              | 2016-2016 | Mexico Vital Registration - Deaths 2016                                                                                                                            |
| Nicaragua           | 2014-2014 | Nicaragua Vital Registration - Deaths 2014 ICD10                                                                                                                   |
| Nicaragua           | 2015-2015 | Nicaragua Vital Registration - Deaths 2015 ICD10                                                                                                                   |
| Panama              | 2015-2015 | Panama Vital Registration - Deaths 2015 ICD10                                                                                                                      |
| Panama              | 2016-2016 | Panama Vital Registration - Deaths 2016                                                                                                                            |
| Venezuela           | 2014-2014 | United Nations Demographic Yearbook                                                                                                                                |
| Brazil              | 2016-2016 | Brazil Mortality Information System - Deaths 2016                                                                                                                  |
| Paraguay            | 1972-1972 | Paraguay Population and Housing Census 1972 - IPUMS                                                                                                                |
| Paraguay            | 1982-1982 | Paraguay Population and Housing Census 1982 - IPUMS                                                                                                                |
| Paraguay            | 1992-1992 | Paraguay Population and Housing Census 1992 - IPUMS                                                                                                                |
| Paraguay            | 2002-2002 | Paraguay Population and Housing Census 2002 - IPUMS                                                                                                                |
| Paraguay            | 2016-2016 | Paraguay Multiple Indicator Cluster Survey 2016                                                                                                                    |
| Afghanistan         | 2015-2016 | Afghanistan Demographic and Health Survey 2015-2016                                                                                                                |
| Algeria             | 2015-2016 | United Nations Demographic Yearbook                                                                                                                                |
| Bahrain             | 2014-2014 | Bahrain Vital Registration - Deaths 2014 ICD10                                                                                                                     |
| Egypt               | 2015-2015 | Egypt Vital Registration - Deaths 2015 ICD10                                                                                                                       |
| Iran                | 2006-2006 | Iran General Census of Population and Housing 2006                                                                                                                 |
| Iran                | 2011-2011 | Iran National Population and Housing Census 2011                                                                                                                   |
| Iran                | 2016-2016 | Iran Population and Housing Census 2016                                                                                                                            |
| Iraq                | 1991-1991 | Iraq Infant and Child Mortality and Nutrition Survey 1991                                                                                                          |
| Kuwait              | 2015-2015 | Kuwait Annual Bulletin for Vital Statistics - Births and Deaths 2015                                                                                               |
| Lebanon             | 2004-2004 | Lebanon Registered and Reported Deaths 2004                                                                                                                        |
| Libya               | 2009-2009 | Libya Vital Statistics 2009                                                                                                                                        |
| Libya               | 2010-2010 | Libya Vital Statistics 2010                                                                                                                                        |
| Libya               | 2011-2011 | Libya Vital Statistics 2011                                                                                                                                        |
| Palestine           | 2010-2010 | Palestine - West Bank and Gaza Strip Vital Registration - Deaths 2010 ICD10                                                                                        |
| Oman                | 2014-2014 | Oman Vital Registration - Deaths 2014 ICD10                                                                                                                        |
| Oman                | 2016-2016 | United Nations Demographic Yearbook                                                                                                                                |
| Qatar               | 1991-1991 | Qatar Vital Statistics Annual Bulletin 1991                                                                                                                        |
| Qatar               | 1998-1998 | Qatar Vital Statistics Annual Bulletin 1998                                                                                                                        |
| Qatar               | 2015-2015 | Qatar Vital Registration - Deaths 2015 ICD10                                                                                                                       |
| Qatar               | 2016-2016 | Qatar Vital Registration - Deaths 2016 ICD10                                                                                                                       |
| Saudi Arabia        | 2016-2016 | United Nations Demographic Yearbook                                                                                                                                |
| Syria               | 2006-2006 | Syria Multiple Indicator Cluster Survey 2006                                                                                                                       |
| Syria               | 2009-2009 | Syria Family Health Survey 2009                                                                                                                                    |
| Turkey              | 2014-2016 | Turkey Vital Registration - Deaths by Age and Sex 2009-2016                                                                                                        |
| India               | 2011-2013 | India Human Development Survey 2011-2013                                                                                                                           |
| India               | 2016-2016 | India - Delhi Medical Certification of Cause of Death Report 2016                                                                                                  |
| India               | 2016-2016 | India SRS Statistical Report 2016                                                                                                                                  |
| Nepal               | 2016-2017 | Nepal Demographic and Health Survey 2016-2017                                                                                                                      |
| Pakistan            | 2016-2017 | Pakistan - Gilgit-Baltistan Multiple Indicator Cluster Survey 2016-2017                                                                                            |

**Appendix Table 13. New data sources added for GBD 2017 mortality estimation**

| Location                   | Year      | Source                                                                                                    |
|----------------------------|-----------|-----------------------------------------------------------------------------------------------------------|
| Taiwan (Province of China) | 2015-2015 | Taiwan Vital Registration - Deaths 2015                                                                   |
| Taiwan (Province of China) | 2016-2016 | Taiwan Vital Registration - Deaths 2016                                                                   |
| American Samoa             | 1955-1973 | United Nations Demographic Yearbook - Historical Supplement 1997                                          |
| Guam                       | 1983-1983 | United States Vital Statistics Report 1983                                                                |
| Guam                       | 1984-1984 | United States Vital Statistics Report 1984                                                                |
| Guam                       | 1987-1987 | United States Vital Statistics Report 1987                                                                |
| Papua New Guinea           | 2006-2007 | Papua New Guinea Demographic and Health Survey 2006-2007                                                  |
| Samoa                      | 2014-2014 | Samoa Demographic and Health Survey 2014                                                                  |
| Solomon Islands            | 2015-2015 | Solomon Islands Demographic and Health Survey 2015                                                        |
| Cambodia                   | 2004-2004 | Cambodia Intercensal Population Survey 2004                                                               |
| Indonesia                  | 1971-1971 | Indonesia Population and Housing Census 1971                                                              |
| Indonesia                  | 2010-2010 | United Nations Demographic Yearbook                                                                       |
| Malaysia                   | 2010-2010 | Malaysia Vital Registration - Deaths 2010 ICD10                                                           |
| Malaysia                   | 2011-2011 | Malaysia Vital Registration - Deaths 2011 ICD10                                                           |
| Malaysia                   | 2013-2013 | Malaysia Vital Registration - Deaths 2013 ICD10                                                           |
| Malaysia                   | 2014-2015 | United Nations Demographic Yearbook                                                                       |
| Maldives                   | 2014-2014 | United Nations Demographic Yearbook                                                                       |
| Mauritius                  | 2015-2015 | Mauritius Digest of Demographic Statistics 2015                                                           |
| Mauritius                  | 2016-2016 | Mauritius Digest of Demographic Statistics 2016                                                           |
| Myanmar                    | 2015-2016 | Myanmar Demographic and Health Survey 2015-2016                                                           |
| Sri Lanka                  | 2013-2013 | Sri Lanka Vital Statistics - Deaths 2013                                                                  |
| Sri Lanka                  | 2016-2016 | Sri Lanka Demographic and Health Survey 2016                                                              |
| Seychelles                 | 2015-2016 | Seychelles Statistical Bulletin: Population and Vital Statistics December 2016                            |
| Thailand                   | 2015-2015 | Thailand Vital Registration - Deaths 2015 ICD10                                                           |
| Thailand                   | 2016-2016 | Thailand Vital Registration - Deaths 2016 ICD10                                                           |
| Timor-Leste                | 2016-2016 | Timor-Leste Demographic and Health Survey 2016                                                            |
| Vietnam                    | 1994-1994 | Vietnam Intercensal Demographic Survey 1994                                                               |
| Burundi                    | 2016-2017 | Burundi Demographic and Health Survey 2016-2017                                                           |
| Ethiopia                   | 1994-1997 | Ethiopia Population and Housing Census 1994 - IPUMS                                                       |
| Kenya                      | 2007-2007 | Kenya Malaria Indicator Survey 2007                                                                       |
| Kenya                      | 2013-2014 | Kenya - Bungoma County Multiple Indicator Survey 2013-2014                                                |
| Kenya                      | 2013-2014 | Kenya - Kakamega County Multiple Indicator Survey 2013-2014                                               |
| Kenya                      | 2013-2014 | Kenya - Turkana County Multiple Indicator Survey 2013-2014                                                |
| Malawi                     | 2015-2016 | Malawi Demographic and Health Survey 2015-2016                                                            |
| Malawi                     | 2017-2017 | Malawi Malaria Indicator Survey 2017                                                                      |
| Uganda                     | 1992-1993 | Uganda Integrated Household Survey 1992-1993                                                              |
| Uganda                     | 2009-2010 | Uganda Living Standards Measurement Survey - Integrated Survey on Agriculture 2009-2010                   |
| Uganda                     | 2016-2016 | Uganda Demographic and Health Survey 2016                                                                 |
| Botswana                   | 2007-2007 | Botswana Vital Registration Death Data 2007                                                               |
| Botswana                   | 2011-2011 | Botswana Vital Statistics Report 2011                                                                     |
| Botswana                   | 2013-2013 | Botswana Vital Statistics Report 2013                                                                     |
| Botswana                   | 2014-2014 | Botswana Vital Statistics Report 2014                                                                     |
| Botswana                   | 2015-2015 | Botswana Vital Statistics Report 2015                                                                     |
| South Africa               | 1996-1996 | South Africa Census 1996                                                                                  |
| South Africa               | 2011-2011 | United Nations Demographic Yearbook                                                                       |
| South Africa               | 2015-2015 | South Africa Vital Registration - Causes of Death 2015                                                    |
| South Africa               | 2016-2016 | South Africa Demographic and Health Survey 2016                                                           |
| South Africa               | 2016-2016 | South Africa Community Survey 2016                                                                        |
| Burkina Faso               | 2006-2006 | Burkina Faso Population and Housing Census 2006 - IPUMS                                                   |
| Cameroon                   | 2005-2005 | Cameroon Population and Housing Census 2005 - IPUMS                                                       |
| Cote d'Ivoire              | 2016-2016 | Cote d'Ivoire Multiple Indicator Cluster Survey 2016                                                      |
| Ghana                      | 1991-1992 | Ghana Living Standards Measurement Survey 1991-1992                                                       |
| Ghana                      | 2016-2016 | Ghana Malaria Indicator Survey 2016                                                                       |
| Guinea                     | 2014-2014 | United Nations Demographic Yearbook                                                                       |
| Guinea                     | 2016-2016 | Guinea Multiple Indicator Cluster Survey 2016                                                             |
| Liberia                    | 2016-2016 | Liberia Malaria Indicator Survey 2016                                                                     |
| Mali                       | 2015-2015 | Mali Multiple Indicator Cluster Survey 2015                                                               |
| Mauritania                 | 2015-2015 | Mauritania Multiple Indicator Cluster Survey 2015                                                         |
| Nigeria                    | 1986-1987 | Nigeria - Ondo Special Demographic and Health Survey 1986-1987                                            |
| Nigeria                    | 2008-2010 | Nigeria Living Standards Survey 2008-2010                                                                 |
| Nigeria                    | 2016-2017 | Nigeria Multiple Indicator Cluster Survey with National Immunization Coverage Survey Supplement 2016-2017 |
| Senegal                    | 2016-2016 | Senegal Continuous Demographic and Health Survey 2016                                                     |
| Sierra Leone               | 2008-2012 | Sierra Leone Statistical Digest 2007-2013                                                                 |
| USSR                       | 1958-1958 | USSR - Russia Mortality of the Urban and Rural Population 1958-1959                                       |
| USSR                       | 1969-1969 | USSR - Russia Mortality of the Urban and Rural Population 1969-1970                                       |
| USSR                       | 1978-1978 | USSR - Russia Mortality of the Urban and Rural Population 1978-1979                                       |
| USSR                       | 1983-1984 | WHO Mortality Database Version March 2017                                                                 |
| Yugoslavia                 | 1950-1959 | United Nations Demographic Yearbook - Historical Supplement 1997                                          |
| Yugoslavia                 | 1960-1990 | WHO Mortality Database Version March 2017                                                                 |

**Appendix Table 14: Number of outliers for the age-sex model by location, source type, and age group**

| Location                    | Source Type | Outliers Early Neonatal | Outliers Late Neonatal | Outliers Post Neonatal | Outliers Infant | Outliers Child |
|-----------------------------|-------------|-------------------------|------------------------|------------------------|-----------------|----------------|
| Afghanistan                 | DHS         | 33                      | 33                     | 33                     | 33              | 33             |
| Albania                     | DHS         | 18                      | 9                      | 9                      | 9               | 9              |
| Albania                     | LSMS        | 15                      | 15                     | 15                     | 15              | 15             |
| Albania                     | RHS         | 12                      | 4                      | 3                      | 3               | 3              |
| Albania                     | VR          | 99                      | 69                     | 69                     | 69              | 69             |
| Algeria                     | MICS        | 9                       | 9                      | 9                      | 9               | 9              |
| Algeria                     | PAPFAM      | 9                       | 9                      | 9                      | 9               | 9              |
| Algeria                     | VR          | 6                       | 6                      | 6                      | 6               | 6              |
| Algeria                     | Other       | 12                      | 12                     | 12                     | 12              | 12             |
| American Samoa              | VR          | 12                      | 24                     | 13                     | 9               | 18             |
| Andorra                     | VR          | 15                      | 15                     | 15                     | 20              | 29             |
| Angola                      | DHS         | 9                       | 9                      | 9                      | 9               | 9              |
| Angola                      | Other       | 9                       | 9                      | 9                      | 9               | 9              |
| Antigua and Barbuda         | VR          | 39                      | 51                     | 38                     | 36              | 40             |
| Argentina                   | VR          | 3                       | 3                      | 3                      | 3               | 3              |
| Armenia                     | DHS         | 36                      | 39                     | 36                     | 36              | 37             |
| Armenia                     | VR          | 81                      | 81                     | 81                     | 81              | 81             |
| Azerbaijan                  | DHS         | 9                       | 9                      | 9                      | 9               | 9              |
| Azerbaijan                  | VR          | 108                     | 108                    | 108                    | 108             | 108            |
| Bahrain                     | VR          | 3                       | 3                      | 3                      | 3               | 3              |
| Bangladesh                  | DHS         | 90                      | 90                     | 90                     | 90              | 90             |
| Bangladesh                  | WFS         | 6                       | 6                      | 6                      | 6               | 6              |
| Barbados                    | VR          | 3                       | 3                      | 3                      | 3               | 8              |
| Belarus                     | VR          | 138                     | 138                    | 138                    | 138             | 138            |
| Belize                      | MICS        | 9                       | 12                     | 9                      | 9               | 9              |
| Belize                      | RHS         | 15                      | 18                     | 15                     | 15              | 15             |
| Benin                       | DHS         | 36                      | 36                     | 36                     | 36              | 36             |
| Benin                       | MICS        | 9                       | 9                      | 9                      | 9               | 9              |
| Benin                       | WFS         | 9                       | 9                      | 9                      | 9               | 9              |
| Bermuda                     | VR          | 48                      | 72                     | 64                     | 46              | 73             |
| Bolivia                     | DHS         | 54                      | 54                     | 45                     | 45              | 45             |
| Bolivia                     | VR          | 48                      | 48                     | 48                     | 48              | 48             |
| Botswana                    | DHS         | 15                      | 6                      | 6                      | 6               | 6              |
| Botswana                    | VR          | 18                      | 18                     | 18                     | 18              | 18             |
| Botswana                    | Other       | 23                      | 21                     | 14                     | 14              | 14             |
| Brazil                      | DHS         | 24                      | 24                     | 24                     | 24              | 24             |
| Brazil                      | VR          | 129                     | 129                    | 129                    | 129             | 129            |
| Brazil - Acre               | DHS         | 9                       | 9                      | 9                      | 9               | 9              |
| Brazil - Acre               | VR          | 114                     | 114                    | 114                    | 114             | 114            |
| Brazil - Alagoas            | DHS         | 17                      | 15                     | 12                     | 12              | 14             |
| Brazil - Alagoas            | VR          | 114                     | 114                    | 114                    | 114             | 114            |
| Brazil - Amapá              | DHS         | 9                       | 9                      | 9                      | 9               | 9              |
| Brazil - Amazonas           | DHS         | 9                       | 14                     | 12                     | 9               | 11             |
| Brazil - Amazonas           | VR          | 66                      | 66                     | 66                     | 66              | 66             |
| Brazil - Bahia              | DHS         | 21                      | 22                     | 21                     | 21              | 21             |
| Brazil - Bahia              | VR          | 114                     | 114                    | 114                    | 114             | 114            |
| Brazil - Ceará              | DHS         | 15                      | 16                     | 15                     | 15              | 17             |
| Brazil - Ceará              | VR          | 114                     | 114                    | 114                    | 114             | 114            |
| Brazil - Distrito Federal   | DHS         | 18                      | 18                     | 18                     | 18              | 18             |
| Brazil - Distrito Federal   | VR          | 105                     | 105                    | 105                    | 105             | 105            |
| Brazil - Espírito Santo     | DHS         | 21                      | 21                     | 21                     | 21              | 21             |
| Brazil - Espírito Santo     | VR          | 114                     | 114                    | 114                    | 114             | 114            |
| Brazil - Goiás              | DHS         | 21                      | 21                     | 21                     | 21              | 21             |
| Brazil - Goiás              | VR          | 90                      | 90                     | 90                     | 90              | 90             |
| Brazil - Maranhão           | DHS         | 13                      | 17                     | 12                     | 12              | 12             |
| Brazil - Maranhão           | VR          | 114                     | 114                    | 114                    | 114             | 114            |
| Brazil - Mato Grosso        | DHS         | 10                      | 11                     | 10                     | 9               | 10             |
| Brazil - Mato Grosso        | VR          | 99                      | 99                     | 99                     | 99              | 99             |
| Brazil - Mato Grosso do Sul | DHS         | 9                       | 13                     | 10                     | 9               | 14             |
| Brazil - Mato Grosso do Sul | VR          | 75                      | 75                     | 75                     | 75              | 75             |
| Brazil - Minas Gerais       | DHS         | 12                      | 14                     | 13                     | 12              | 14             |
| Brazil - Minas Gerais       | VR          | 114                     | 114                    | 114                    | 114             | 114            |
| Brazil - Paraná             | DHS         | 21                      | 21                     | 21                     | 21              | 21             |
| Brazil - Paraná             | VR          | 105                     | 105                    | 105                    | 105             | 105            |
| Brazil - Paraíba            | DHS         | 11                      | 14                     | 9                      | 9               | 14             |
| Brazil - Paraíba            | VR          | 108                     | 108                    | 108                    | 108             | 108            |
| Brazil - Pará               | DHS         | 13                      | 13                     | 9                      | 9               | 10             |
| Brazil - Pará               | VR          | 114                     | 114                    | 114                    | 114             | 114            |

**Appendix Table 14: Number of outliers for the age-sex model by location, source type, and age group**

| Location                     | Source Type | Outliers Early Neonatal | Outliers Late Neonatal | Outliers Post Neonatal | Outliers Infant | Outliers Child |
|------------------------------|-------------|-------------------------|------------------------|------------------------|-----------------|----------------|
| Brazil - Pernambuco          | DHS         | 19                      | 18                     | 18                     | 18              | 19             |
| Brazil - Pernambuco          | VR          | 114                     | 114                    | 114                    | 114             | 114            |
| Brazil - Piauí               | DHS         | 21                      | 25                     | 21                     | 21              | 21             |
| Brazil - Piauí               | VR          | 114                     | 114                    | 114                    | 114             | 114            |
| Brazil - Rio Grande do Norte | DHS         | 13                      | 17                     | 12                     | 12              | 14             |
| Brazil - Rio Grande do Norte | VR          | 114                     | 114                    | 114                    | 114             | 114            |
| Brazil - Rio Grande do Sul   | DHS         | 13                      | 16                     | 13                     | 12              | 19             |
| Brazil - Rio Grande do Sul   | VR          | 42                      | 42                     | 42                     | 42              | 42             |
| Brazil - Rio de Janeiro      | DHS         | 13                      | 15                     | 13                     | 12              | 17             |
| Brazil - Rio de Janeiro      | VR          | 108                     | 108                    | 108                    | 108             | 108            |
| Brazil - Rondônia            | DHS         | 12                      | 12                     | 12                     | 12              | 12             |
| Brazil - Rondônia            | VR          | 9                       | 9                      | 9                      | 9               | 9              |
| Brazil - Roraima             | DHS         | 9                       | 9                      | 9                      | 9               | 9              |
| Brazil - Roraima             | VR          | 96                      | 96                     | 96                     | 96              | 96             |
| Brazil - Santa Catarina      | DHS         | 18                      | 18                     | 18                     | 18              | 18             |
| Brazil - Santa Catarina      | VR          | 114                     | 114                    | 114                    | 114             | 114            |
| Brazil - Sergipe             | DHS         | 12                      | 15                     | 10                     | 9               | 15             |
| Brazil - Sergipe             | VR          | 114                     | 114                    | 114                    | 114             | 114            |
| Brazil - São Paulo           | DHS         | 15                      | 16                     | 15                     | 15              | 19             |
| Brazil - São Paulo           | VR          | 63                      | 63                     | 63                     | 63              | 63             |
| Brazil - Tocantins           | DHS         | 9                       | 9                      | 9                      | 9               | 9              |
| Brazil - Tocantins           | VR          | 81                      | 81                     | 81                     | 81              | 81             |
| Burkina Faso                 | DHS         | 36                      | 36                     | 36                     | 36              | 36             |
| Burkina Faso                 | Other       | 9                       | 9                      | 9                      | 9               | 9              |
| Burundi                      | DHS         | 24                      | 24                     | 24                     | 24              | 24             |
| Cambodia                     | DHS         | 45                      | 45                     | 45                     | 45              | 45             |
| Cameroon                     | DHS         | 39                      | 39                     | 39                     | 39              | 39             |
| Cameroon                     | MICS        | 9                       | 9                      | 9                      | 9               | 9              |
| Cameroon                     | WFS         | 9                       | 9                      | 9                      | 9               | 9              |
| Cape Verde                   | RHS         | 6                       | 6                      | 6                      | 6               | 6              |
| Central African Republic     | DHS         | 9                       | 9                      | 9                      | 9               | 9              |
| Chad                         | DHS         | 30                      | 30                     | 30                     | 30              | 30             |
| Colombia                     | DHS         | 69                      | 69                     | 69                     | 69              | 69             |
| Colombia                     | VR          | 105                     | 105                    | 105                    | 105             | 105            |
| Colombia                     | WFS         | 6                       | 6                      | 6                      | 6               | 6              |
| Comoros                      | DHS         | 18                      | 18                     | 18                     | 18              | 18             |
| Congo (Brazzaville)          | DHS         | 48                      | 48                     | 48                     | 48              | 48             |
| Costa Rica                   | RHS         | 2                       | 4                      | 2                      | 2               | 2              |
| Costa Rica                   | WFS         | 6                       | 6                      | 6                      | 6               | 6              |
| Cote d'Ivoire                | DHS         | 24                      | 24                     | 24                     | 24              | 24             |
| Cote d'Ivoire                | LSMS        | 3                       | 3                      | 3                      | 3               | 3              |
| Cote d'Ivoire                | WFS         | 9                       | 9                      | 9                      | 9               | 9              |
| Cote d'Ivoire                | Other       | 9                       | 9                      | 9                      | 9               | 9              |
| Croatia                      | VR          | 3                       | 3                      | 3                      | 3               | 3              |
| Cyprus                       | VR          | 3                       | 3                      | 3                      | 3               | 4              |
| Czech Republic               | RHS         | 15                      | 15                     | 15                     | 15              | 15             |
| DR Congo                     | DHS         | 21                      | 21                     | 21                     | 21              | 21             |
| Djibouti                     | PAPFAM      | 15                      | 15                     | 15                     | 15              | 15             |
| Dominica                     | VR          | 192                     | 192                    | 192                    | 192             | 192            |
| Dominican Republic           | DHS         | 78                      | 82                     | 78                     | 78              | 78             |
| Dominican Republic           | MICS        | 12                      | 12                     | 12                     | 12              | 12             |
| Dominican Republic           | VR          | 198                     | 198                    | 198                    | 198             | 198            |
| Dominican Republic           | WFS         | 33                      | 33                     | 33                     | 33              | 33             |
| Dominican Republic           | Other       | 9                       | 9                      | 9                      | 9               | 9              |
| Ecuador                      | DHS         | 15                      | 6                      | 6                      | 6               | 6              |
| Ecuador                      | RHS         | 45                      | 27                     | 27                     | 27              | 27             |
| Ecuador                      | VR          | 174                     | 66                     | 66                     | 66              | 66             |
| Ecuador                      | WFS         | 18                      | 18                     | 18                     | 18              | 18             |
| Ecuador                      | Other       | 9                       | 12                     | 9                      | 9               | 9              |
| Egypt                        | DHS         | 81                      | 81                     | 81                     | 81              | 81             |
| Egypt                        | VR          | 168                     | 168                    | 168                    | 168             | 168            |
| Egypt                        | WFS         | 9                       | 9                      | 9                      | 9               | 9              |
| Egypt                        | Other       | 12                      | 12                     | 12                     | 12              | 12             |
| El Salvador                  | MICS        | 9                       | 9                      | 9                      | 9               | 9              |
| El Salvador                  | RHS         | 30                      | 30                     | 30                     | 30              | 30             |
| El Salvador                  | VR          | 195                     | 195                    | 195                    | 195             | 195            |
| Eritrea                      | DHS         | 18                      | 18                     | 18                     | 18              | 18             |
| Ethiopia                     | DHS         | 54                      | 54                     | 54                     | 54              | 54             |



**Appendix Table 14: Number of outliers for the age-sex model by location, source type, and age group**

| Location                  | Source Type | Outliers Early Neonatal | Outliers Late Neonatal | Outliers Post Neonatal | Outliers Infant | Outliers Child |
|---------------------------|-------------|-------------------------|------------------------|------------------------|-----------------|----------------|
| Ethiopia                  | Other       | 6                       | 6                      | 6                      | 6               | 6              |
| Fiji                      | VR          | 162                     | 162                    | 162                    | 114             | 114            |
| Fiji                      | WFS         | 15                      | 15                     | 15                     | 6               | 6              |
| Gabon                     | DHS         | 18                      | 20                     | 18                     | 18              | 18             |
| Georgia                   | RHS         | 29                      | 29                     | 29                     | 29              | 29             |
| Georgia                   | VR          | 69                      | 69                     | 69                     | 69              | 69             |
| Ghana                     | DHS         | 63                      | 63                     | 63                     | 63              | 63             |
| Ghana                     | MICS        | 18                      | 18                     | 18                     | 18              | 18             |
| Ghana                     | WFS         | 9                       | 9                      | 9                      | 9               | 9              |
| Greenland                 | VR          | 3                       | 3                      | 3                      | 3               | 16             |
| Grenada                   | VR          | 9                       | 26                     | 10                     | 9               | 14             |
| Guam                      | VR          | 0                       | 8                      | 0                      | 0               | 3              |
| Guatemala                 | DHS         | 36                      | 36                     | 36                     | 36              | 36             |
| Guatemala                 | RHS         | 18                      | 18                     | 18                     | 18              | 18             |
| Guatemala                 | VR          | 0                       | 2                      | 0                      | 0               | 0              |
| Guinea                    | DHS         | 27                      | 27                     | 27                     | 27              | 27             |
| Guinea-Bissau             | MICS        | 9                       | 9                      | 9                      | 9               | 9              |
| Guyana                    | DHS         | 9                       | 9                      | 9                      | 9               | 10             |
| Guyana                    | MICS        | 9                       | 9                      | 9                      | 9               | 9              |
| Guyana                    | VR          | 135                     | 135                    | 135                    | 135             | 135            |
| Guyana                    | WFS         | 6                       | 6                      | 6                      | 6               | 6              |
| Guyana                    | Other       | 9                       | 10                     | 9                      | 9               | 10             |
| Haiti                     | DHS         | 36                      | 36                     | 36                     | 36              | 36             |
| Haiti                     | VR          | 21                      | 21                     | 21                     | 21              | 21             |
| Haiti                     | WFS         | 6                       | 6                      | 6                      | 6               | 6              |
| Haiti                     | Other       | 3                       | 3                      | 3                      | 3               | 1              |
| Honduras                  | DHS         | 21                      | 21                     | 21                     | 21              | 21             |
| Honduras                  | RHS         | 18                      | 18                     | 18                     | 18              | 18             |
| Honduras                  | VR          | 132                     | 132                    | 132                    | 132             | 132            |
| Iceland                   | VR          | 6                       | 30                     | 11                     | 0               | 13             |
| India                     | DHS         | 36                      | 36                     | 36                     | 36              | 36             |
| India                     | VR          | 45                      | 45                     | 45                     | 45              | 45             |
| India                     | Other       | 12                      | 12                     | 12                     | 12              | 12             |
| India - Andhra Pradesh    | DHS         | 54                      | 54                     | 54                     | 54              | 54             |
| India - Andhra Pradesh    | SRS         | 51                      | 51                     | 51                     | 51              | 51             |
| India - Andhra Pradesh    | VR          | 9                       | 9                      | 9                      | 9               | 9              |
| India - Andhra Pradesh    | Other       | 21                      | 21                     | 21                     | 21              | 22             |
| India - Arunachal Pradesh | DHS         | 12                      | 13                     | 12                     | 12              | 12             |
| India - Arunachal Pradesh | VR          | 6                       | 6                      | 6                      | 6               | 6              |
| India - Arunachal Pradesh | Other       | 9                       | 9                      | 9                      | 9               | 9              |
| India - Assam             | DHS         | 24                      | 24                     | 24                     | 24              | 24             |
| India - Assam             | SRS         | 3                       | 3                      | 3                      | 3               | 3              |
| India - Assam             | VR          | 3                       | 3                      | 3                      | 3               | 3              |
| India - Assam             | Other       | 3                       | 3                      | 3                      | 3               | 5              |
| India - Bihar             | DHS         | 27                      | 27                     | 27                     | 27              | 27             |
| India - Bihar             | VR          | 3                       | 3                      | 3                      | 3               | 3              |
| India - Bihar             | Other       | 20                      | 20                     | 20                     | 20              | 20             |
| India - Chhattisgarh      | DHS         | 9                       | 9                      | 9                      | 9               | 9              |
| India - Chhattisgarh      | VR          | 6                       | 6                      | 6                      | 6               | 6              |
| India - Chhattisgarh      | Other       | 20                      | 20                     | 20                     | 20              | 20             |
| India - Delhi             | DHS         | 21                      | 21                     | 21                     | 21              | 21             |
| India - Delhi             | SRS         | 9                       | 9                      | 9                      | 9               | 9              |
| India - Delhi             | Other       | 26                      | 26                     | 26                     | 26              | 26             |
| India - Goa               | DHS         | 21                      | 24                     | 21                     | 21              | 21             |
| India - Goa               | VR          | 21                      | 21                     | 21                     | 21              | 21             |
| India - Goa               | Other       | 9                       | 9                      | 9                      | 9               | 9              |
| India - Gujarat           | DHS         | 24                      | 24                     | 24                     | 24              | 24             |
| India - Gujarat           | VR          | 15                      | 15                     | 15                     | 15              | 15             |
| India - Gujarat           | Other       | 20                      | 20                     | 20                     | 20              | 20             |
| India - Haryana           | DHS         | 21                      | 21                     | 21                     | 21              | 21             |
| India - Haryana           | Other       | 20                      | 20                     | 20                     | 20              | 21             |
| India - Himachal Pradesh  | DHS         | 24                      | 24                     | 24                     | 24              | 24             |
| India - Himachal Pradesh  | SRS         | 0                       | 0                      | 0                      | 0               | 1              |
| India - Himachal Pradesh  | VR          | 15                      | 15                     | 15                     | 15              | 15             |
| India - Himachal Pradesh  | Other       | 20                      | 20                     | 20                     | 20              | 20             |
| India - Jammu and Kashmir | DHS         | 24                      | 24                     | 24                     | 24              | 24             |
| India - Jammu and Kashmir | SRS         | 0                       | 0                      | 0                      | 0               | 1              |
| India - Jammu and Kashmir | VR          | 15                      | 15                     | 15                     | 15              | 15             |

**Appendix Table 14: Number of outliers for the age-sex model by location, source type, and age group**

| Location                                   | Source Type | Outliers Early Neonatal | Outliers Late Neonatal | Outliers Post Neonatal | Outliers Infant | Outliers Child |
|--------------------------------------------|-------------|-------------------------|------------------------|------------------------|-----------------|----------------|
| India - Jammu and Kashmir                  | Other       | 8                       | 8                      | 8                      | 8               | 10             |
| India - Jharkhand                          | DHS         | 6                       | 6                      | 6                      | 6               | 6              |
| India - Jharkhand                          | SRS         | 6                       | 6                      | 6                      | 6               | 6              |
| India - Jharkhand                          | Other       | 14                      | 14                     | 14                     | 14              | 14             |
| India - Karnataka                          | DHS         | 27                      | 27                     | 27                     | 27              | 27             |
| India - Karnataka                          | VR          | 21                      | 21                     | 21                     | 21              | 21             |
| India - Karnataka                          | Other       | 22                      | 22                     | 22                     | 22              | 22             |
| India - Kerala                             | DHS         | 27                      | 31                     | 27                     | 27              | 29             |
| India - Kerala                             | SRS         | 15                      | 15                     | 15                     | 15              | 15             |
| India - Kerala                             | VR          | 21                      | 21                     | 21                     | 21              | 21             |
| India - Kerala                             | Other       | 15                      | 15                     | 15                     | 15              | 15             |
| India - Madhya Pradesh                     | DHS         | 27                      | 27                     | 27                     | 27              | 27             |
| India - Madhya Pradesh                     | VR          | 21                      | 21                     | 21                     | 21              | 21             |
| India - Madhya Pradesh                     | Other       | 18                      | 18                     | 18                     | 18              | 18             |
| India - Maharashtra                        | DHS         | 27                      | 27                     | 27                     | 27              | 27             |
| India - Maharashtra                        | SRS         | 21                      | 21                     | 21                     | 21              | 21             |
| India - Maharashtra                        | VR          | 9                       | 9                      | 9                      | 9               | 9              |
| India - Maharashtra                        | Other       | 18                      | 18                     | 18                     | 18              | 18             |
| India - Manipur                            | DHS         | 21                      | 21                     | 21                     | 21              | 21             |
| India - Manipur                            | VR          | 15                      | 15                     | 15                     | 15              | 15             |
| India - Manipur                            | Other       | 9                       | 9                      | 9                      | 9               | 9              |
| India - Meghalaya                          | DHS         | 15                      | 15                     | 15                     | 15              | 15             |
| India - Meghalaya                          | Other       | 9                       | 9                      | 9                      | 9               | 9              |
| India - Mizoram                            | DHS         | 15                      | 23                     | 15                     | 15              | 15             |
| India - Mizoram                            | Other       | 9                       | 9                      | 9                      | 9               | 9              |
| India - Nagaland                           | DHS         | 18                      | 17                     | 17                     | 15              | 19             |
| India - Nagaland                           | VR          | 15                      | 15                     | 15                     | 15              | 15             |
| India - Nagaland                           | Other       | 6                       | 6                      | 6                      | 6               | 6              |
| India - Odisha                             | DHS         | 27                      | 27                     | 27                     | 27              | 27             |
| India - Odisha                             | VR          | 21                      | 21                     | 21                     | 21              | 21             |
| India - Odisha                             | Other       | 21                      | 21                     | 21                     | 21              | 21             |
| India - Punjab                             | DHS         | 18                      | 18                     | 18                     | 18              | 18             |
| India - Punjab                             | SRS         | 6                       | 6                      | 6                      | 6               | 6              |
| India - Punjab                             | VR          | 21                      | 21                     | 21                     | 21              | 21             |
| India - Punjab                             | Other       | 20                      | 20                     | 20                     | 20              | 21             |
| India - Rajasthan                          | DHS         | 27                      | 27                     | 27                     | 27              | 27             |
| India - Rajasthan                          | VR          | 18                      | 18                     | 18                     | 18              | 18             |
| India - Rajasthan                          | Other       | 21                      | 21                     | 21                     | 21              | 21             |
| India - Sikkim                             | DHS         | 9                       | 9                      | 9                      | 9               | 10             |
| India - Sikkim                             | VR          | 15                      | 15                     | 15                     | 15              | 15             |
| India - Sikkim                             | Other       | 9                       | 9                      | 9                      | 9               | 9              |
| India - Tamil Nadu                         | DHS         | 27                      | 27                     | 27                     | 27              | 27             |
| India - Tamil Nadu                         | VR          | 21                      | 21                     | 21                     | 21              | 21             |
| India - Tamil Nadu                         | Other       | 20                      | 20                     | 20                     | 20              | 20             |
| India - Telangana                          | SRS         | 51                      | 51                     | 51                     | 51              | 52             |
| India - Telangana                          | VR          | 6                       | 6                      | 6                      | 6               | 6              |
| India - Telangana                          | Other       | 3                       | 3                      | 3                      | 3               | 4              |
| India - Tripura                            | DHS         | 18                      | 20                     | 18                     | 18              | 18             |
| India - Tripura                            | VR          | 9                       | 9                      | 9                      | 9               | 9              |
| India - Tripura                            | Other       | 0                       | 0                      | 0                      | 0               | 5              |
| India - Union Territories other than Delhi | VR          | 15                      | 15                     | 15                     | 15              | 15             |
| India - Union Territories other than Delhi | Other       | 9                       | 9                      | 9                      | 9               | 9              |
| India - Uttar Pradesh                      | DHS         | 27                      | 27                     | 27                     | 27              | 27             |
| India - Uttar Pradesh                      | Other       | 20                      | 20                     | 20                     | 20              | 20             |
| India - Uttarakhand                        | DHS         | 6                       | 6                      | 6                      | 6               | 6              |
| India - Uttarakhand                        | Other       | 8                       | 8                      | 8                      | 8               | 9              |
| India - West Bengal                        | DHS         | 27                      | 27                     | 27                     | 27              | 27             |
| India - West Bengal                        | VR          | 3                       | 3                      | 3                      | 3               | 3              |
| India - West Bengal                        | Other       | 20                      | 20                     | 20                     | 20              | 20             |
| Indonesia                                  | Census      | 21                      | 21                     | 21                     | 21              | 21             |
| Indonesia                                  | DHS         | 84                      | 84                     | 84                     | 84              | 84             |
| Indonesia                                  | WFS         | 6                       | 6                      | 6                      | 6               | 6              |
| Indonesia                                  | Other       | 33                      | 33                     | 33                     | 33              | 33             |
| Iran                                       | VR          | 96                      | 96                     | 96                     | 96              | 96             |
| Iran                                       | Other       | 12                      | 12                     | 12                     | 12              | 12             |
| Iraq                                       | MICS        | 30                      | 30                     | 30                     | 30              | 30             |
| Iraq                                       | VR          | 72                      | 72                     | 72                     | 72              | 72             |
| Iraq                                       | Other       | 12                      | 21                     | 12                     | 12              | 12             |

**Appendix Table 14: Number of outliers for the age-sex model by location, source type, and age group**

| Location                | Source Type | Outliers Early Neonatal | Outliers Late Neonatal | Outliers Post Neonatal | Outliers Infant | Outliers Child |
|-------------------------|-------------|-------------------------|------------------------|------------------------|-----------------|----------------|
| Jamaica                 | VR          | 96                      | 96                     | 96                     | 96              | 96             |
| Jamaica                 | WFS         | 6                       | 6                      | 6                      | 6               | 6              |
| Japan                   | VR          | 3                       | 3                      | 3                      | 3               | 3              |
| Japan - Akita           | VR          | 1                       | 15                     | 2                      | 1               | 0              |
| Japan - Aomori          | VR          | 0                       | 5                      | 0                      | 0               | 1              |
| Japan - Ehime           | VR          | 0                       | 10                     | 0                      | 0               | 0              |
| Japan - Fukui           | VR          | 1                       | 13                     | 1                      | 0               | 2              |
| Japan - Fukuoka         | VR          | 0                       | 2                      | 0                      | 0               | 0              |
| Japan - Fukushima       | VR          | 0                       | 1                      | 0                      | 0               | 0              |
| Japan - Gunma           | VR          | 0                       | 1                      | 0                      | 0               | 0              |
| Japan - Hiroshima       | VR          | 0                       | 1                      | 0                      | 0               | 0              |
| Japan - Hyōgo           | VR          | 3                       | 4                      | 3                      | 3               | 3              |
| Japan - Ibaraki         | VR          | 0                       | 4                      | 0                      | 0               | 0              |
| Japan - Ishikawa        | VR          | 1                       | 6                      | 0                      | 0               | 1              |
| Japan - Iwate           | VR          | 4                       | 8                      | 3                      | 3               | 4              |
| Japan - Kagawa          | VR          | 0                       | 10                     | 0                      | 0               | 0              |
| Japan - Kagoshima       | VR          | 0                       | 2                      | 0                      | 0               | 0              |
| Japan - Kumamoto        | VR          | 0                       | 1                      | 0                      | 0               | 0              |
| Japan - Kyōto           | VR          | 0                       | 7                      | 0                      | 0               | 0              |
| Japan - Kōchi           | VR          | 0                       | 13                     | 1                      | 0               | 3              |
| Japan - Mie             | VR          | 0                       | 1                      | 0                      | 0               | 0              |
| Japan - Miyagi          | VR          | 3                       | 5                      | 3                      | 3               | 3              |
| Japan - Miyazaki        | VR          | 0                       | 1                      | 0                      | 0               | 0              |
| Japan - Nagano          | VR          | 0                       | 9                      | 0                      | 0               | 0              |
| Japan - Nara            | VR          | 1                       | 5                      | 1                      | 0               | 0              |
| Japan - Niigata         | VR          | 0                       | 1                      | 0                      | 0               | 0              |
| Japan - Okayama         | VR          | 0                       | 2                      | 0                      | 0               | 0              |
| Japan - Saga            | VR          | 2                       | 14                     | 1                      | 0               | 0              |
| Japan - Shiga           | VR          | 0                       | 1                      | 0                      | 0               | 1              |
| Japan - Shimane         | VR          | 2                       | 13                     | 1                      | 0               | 1              |
| Japan - Shizuoka        | VR          | 0                       | 2                      | 0                      | 0               | 0              |
| Japan - Tochigi         | VR          | 0                       | 1                      | 0                      | 0               | 0              |
| Japan - Tokushima       | VR          | 1                       | 5                      | 1                      | 0               | 1              |
| Japan - Tottori         | VR          | 8                       | 20                     | 6                      | 3               | 4              |
| Japan - Toyama          | VR          | 0                       | 5                      | 0                      | 0               | 0              |
| Japan - Wakayama        | VR          | 0                       | 9                      | 0                      | 0               | 3              |
| Japan - Yamagata        | VR          | 0                       | 4                      | 0                      | 0               | 2              |
| Japan - Yamaguchi       | VR          | 0                       | 11                     | 0                      | 0               | 0              |
| Japan - Yamanashi       | VR          | 5                       | 8                      | 1                      | 0               | 4              |
| Japan - Ōita            | VR          | 1                       | 7                      | 0                      | 0               | 0              |
| Jordan                  | DHS         | 54                      | 54                     | 54                     | 54              | 54             |
| Jordan                  | VR          | 66                      | 66                     | 66                     | 66              | 66             |
| Kazakhstan              | DHS         | 21                      | 23                     | 21                     | 21              | 21             |
| Kazakhstan              | VR          | 42                      | 42                     | 42                     | 42              | 42             |
| Kenya                   | DHS         | 57                      | 57                     | 57                     | 57              | 57             |
| Kenya                   | WFS         | 9                       | 9                      | 9                      | 9               | 9              |
| Kenya                   | Other       | 3                       | 3                      | 3                      | 3               | 3              |
| Kenya - Baringo         | DHS         | 3                       | 4                      | 4                      | 3               | 4              |
| Kenya - Bomet           | DHS         | 13                      | 19                     | 14                     | 12              | 13             |
| Kenya - Bungoma         | DHS         | 14                      | 17                     | 7                      | 6               | 6              |
| Kenya - Bungoma         | MICS        | 6                       | 6                      | 6                      | 6               | 6              |
| Kenya - Busia           | DHS         | 35                      | 44                     | 34                     | 33              | 37             |
| Kenya - Elgeyo Marakwet | DHS         | 37                      | 46                     | 38                     | 36              | 44             |
| Kenya - Embu            | DHS         | 49                      | 55                     | 48                     | 48              | 49             |
| Kenya - Embu            | MICS        | 6                       | 6                      | 6                      | 6               | 6              |
| Kenya - Garissa         | DHS         | 1                       | 10                     | 4                      | 0               | 2              |
| Kenya - Homa Bay        | DHS         | 8                       | 13                     | 6                      | 6               | 6              |
| Kenya - Homa Bay        | MICS        | 6                       | 6                      | 6                      | 6               | 6              |
| Kenya - Isiolo          | DHS         | 21                      | 22                     | 21                     | 21              | 23             |
| Kenya - Isiolo          | MICS        | 3                       | 4                      | 3                      | 3               | 3              |
| Kenya - Kajiado         | DHS         | 44                      | 52                     | 44                     | 40              | 45             |
| Kenya - Kakamega        | DHS         | 14                      | 23                     | 9                      | 9               | 9              |
| Kenya - Kakamega        | MICS        | 6                       | 8                      | 6                      | 6               | 6              |
| Kenya - Kericho         | DHS         | 20                      | 34                     | 19                     | 18              | 23             |
| Kenya - Kiambu          | DHS         | 33                      | 44                     | 32                     | 30              | 38             |
| Kenya - Kilifi          | DHS         | 19                      | 32                     | 19                     | 18              | 20             |
| Kenya - Kirinyaga       | DHS         | 32                      | 46                     | 39                     | 32              | 34             |
| Kenya - Kisii           | DHS         | 17                      | 29                     | 19                     | 16              | 16             |

Appendix Table 14: Number of outliers for the age-sex model by location, source type, and age group

| Location              | Source Type | Outliers Early Neonatal | Outliers Late Neonatal | Outliers Post Neonatal | Outliers Infant | Outliers Child |
|-----------------------|-------------|-------------------------|------------------------|------------------------|-----------------|----------------|
| Kenya - Kisii         | MICS        | 6                       | 7                      | 6                      | 6               | 6              |
| Kenya - Kisumu        | DHS         | 11                      | 23                     | 3                      | 3               | 4              |
| Kenya - Kisumu        | MICS        | 6                       | 9                      | 6                      | 6               | 6              |
| Kenya - Kitui         | DHS         | 22                      | 46                     | 20                     | 16              | 25             |
| Kenya - Kitui         | MICS        | 12                      | 12                     | 12                     | 12              | 12             |
| Kenya - Kwale         | DHS         | 12                      | 34                     | 11                     | 5               | 13             |
| Kenya - Laikipia      | DHS         | 48                      | 48                     | 49                     | 48              | 51             |
| Kenya - Lamu          | DHS         | 24                      | 27                     | 23                     | 23              | 24             |
| Kenya - Machakos      | DHS         | 30                      | 37                     | 32                     | 30              | 34             |
| Kenya - Machakos      | MICS        | 6                       | 9                      | 7                      | 6               | 6              |
| Kenya - Makueni       | DHS         | 25                      | 27                     | 25                     | 24              | 25             |
| Kenya - Makueni       | MICS        | 6                       | 6                      | 6                      | 6               | 6              |
| Kenya - Mandera       | DHS         | 11                      | 17                     | 5                      | 3               | 7              |
| Kenya - Marsabit      | DHS         | 21                      | 24                     | 22                     | 21              | 22             |
| Kenya - Marsabit      | MICS        | 21                      | 21                     | 21                     | 21              | 21             |
| Kenya - Meru          | DHS         | 7                       | 37                     | 15                     | 6               | 14             |
| Kenya - Meru          | MICS        | 9                       | 9                      | 9                      | 9               | 9              |
| Kenya - Migori        | DHS         | 5                       | 13                     | 3                      | 3               | 3              |
| Kenya - Migori        | MICS        | 3                       | 4                      | 3                      | 3               | 3              |
| Kenya - Mombasa       | DHS         | 3                       | 30                     | 9                      | 0               | 8              |
| Kenya - Mombasa       | MICS        | 3                       | 5                      | 3                      | 3               | 3              |
| Kenya - Murang'a      | DHS         | 32                      | 52                     | 34                     | 30              | 41             |
| Kenya - Nairobi       | DHS         | 11                      | 25                     | 10                     | 6               | 9              |
| Kenya - Nakuru        | DHS         | 23                      | 49                     | 22                     | 18              | 32             |
| Kenya - Nandi         | DHS         | 37                      | 51                     | 38                     | 36              | 37             |
| Kenya - Narok         | DHS         | 37                      | 47                     | 35                     | 33              | 37             |
| Kenya - Nyamira       | DHS         | 25                      | 26                     | 26                     | 24              | 29             |
| Kenya - Nyamira       | MICS        | 6                       | 8                      | 6                      | 6               | 6              |
| Kenya - Nyandarua     | DHS         | 49                      | 45                     | 44                     | 43              | 46             |
| Kenya - Nyeri         | DHS         | 35                      | 46                     | 38                     | 33              | 44             |
| Kenya - Samburu       | DHS         | 18                      | 21                     | 18                     | 18              | 19             |
| Kenya - Siaya         | DHS         | 16                      | 36                     | 12                     | 12              | 12             |
| Kenya - Siaya         | MICS        | 6                       | 6                      | 6                      | 6               | 6              |
| Kenya - Taita Taveta  | DHS         | 36                      | 43                     | 39                     | 34              | 38             |
| Kenya - Tana River    | DHS         | 27                      | 29                     | 27                     | 27              | 27             |
| Kenya - Tharaka Nithi | DHS         | 14                      | 17                     | 17                     | 14              | 15             |
| Kenya - Tharaka Nithi | MICS        | 6                       | 10                     | 6                      | 6               | 6              |
| Kenya - Trans Nzoia   | DHS         | 40                      | 47                     | 33                     | 31              | 36             |
| Kenya - Turkana       | DHS         | 14                      | 24                     | 13                     | 12              | 12             |
| Kenya - Turkana       | MICS        | 3                       | 5                      | 3                      | 3               | 3              |
| Kenya - Uasin Gishu   | DHS         | 27                      | 35                     | 27                     | 24              | 26             |
| Kenya - Vihiga        | DHS         | 14                      | 20                     | 9                      | 7               | 9              |
| Kenya - Wajir         | DHS         | 5                       | 11                     | 5                      | 5               | 4              |
| Kenya - West Pokot    | DHS         | 37                      | 42                     | 37                     | 36              | 41             |
| Kiribati              | VR          | 24                      | 24                     | 24                     | 24              | 24             |
| Kyrgyzstan            | DHS         | 15                      | 15                     | 15                     | 15              | 15             |
| Kyrgyzstan            | LSMS        | 6                       | 6                      | 6                      | 6               | 6              |
| Kyrgyzstan            | MICS        | 9                       | 9                      | 9                      | 9               | 9              |
| Kyrgyzstan            | VR          | 69                      | 69                     | 69                     | 69              | 69             |
| Laos                  | MICS        | 9                       | 9                      | 9                      | 9               | 9              |
| Lebanon               | PAPFAM      | 9                       | 9                      | 9                      | 9               | 12             |
| Lebanon               | VR          | 3                       | 3                      | 3                      | 3               | 3              |
| Lebanon               | Other       | 12                      | 12                     | 12                     | 12              | 13             |
| Lesotho               | DHS         | 27                      | 27                     | 27                     | 27              | 27             |
| Lesotho               | WFS         | 6                       | 6                      | 6                      | 6               | 6              |
| Liberia               | DHS         | 39                      | 39                     | 39                     | 39              | 39             |
| Liberia               | Other       | 9                       | 9                      | 9                      | 9               | 9              |
| Libya                 | VR          | 6                       | 6                      | 6                      | 6               | 6              |
| Libya                 | Other       | 12                      | 12                     | 12                     | 12              | 12             |
| Luxembourg            | VR          | 2                       | 15                     | 4                      | 0               | 7              |
| Madagascar            | DHS         | 39                      | 39                     | 39                     | 39              | 39             |
| Madagascar            | VR          | 39                      | 39                     | 39                     | 39              | 39             |
| Malawi                | DHS         | 51                      | 51                     | 51                     | 51              | 51             |
| Malawi                | MICS        | 21                      | 21                     | 21                     | 21              | 21             |
| Malaysia              | WFS         | 6                       | 6                      | 6                      | 6               | 6              |
| Maldives              | DHS         | 9                       | 9                      | 9                      | 9               | 9              |
| Maldives              | VR          | 27                      | 27                     | 27                     | 27              | 27             |
| Mali                  | DHS         | 45                      | 45                     | 45                     | 45              | 45             |

**Appendix Table 14: Number of outliers for the age-sex model by location, source type, and age group**

| Location                     | Source Type | Outliers Early Neonatal | Outliers Late Neonatal | Outliers Post Neonatal | Outliers Infant | Outliers Child |
|------------------------------|-------------|-------------------------|------------------------|------------------------|-----------------|----------------|
| Mali                         | MICS        | 9                       | 9                      | 9                      | 9               | 9              |
| Mali                         | Other       | 3                       | 3                      | 3                      | 3               | 3              |
| Malta                        | VR          | 0                       | 6                      | 0                      | 0               | 4              |
| Mauritania                   | DHS         | 9                       | 9                      | 9                      | 9               | 9              |
| Mauritania                   | MICS        | 21                      | 21                     | 21                     | 21              | 21             |
| Mauritania                   | WFS         | 9                       | 9                      | 9                      | 9               | 9              |
| Mauritania                   | Other       | 9                       | 9                      | 9                      | 9               | 9              |
| Mexico                       | DHS         | 9                       | 9                      | 9                      | 9               | 9              |
| Mexico                       | VR          | 156                     | 156                    | 156                    | 156             | 156            |
| Mexico                       | WFS         | 6                       | 6                      | 6                      | 6               | 6              |
| Mexico - Aguascalientes      | DHS         | 9                       | 9                      | 9                      | 9               | 9              |
| Mexico - Aguascalientes      | VR          | 66                      | 66                     | 66                     | 66              | 66             |
| Mexico - Aguascalientes      | Other       | 21                      | 30                     | 21                     | 21              | 21             |
| Mexico - Baja California     | DHS         | 9                       | 9                      | 9                      | 9               | 9              |
| Mexico - Baja California     | VR          | 87                      | 87                     | 87                     | 87              | 87             |
| Mexico - Baja California     | Other       | 21                      | 30                     | 21                     | 21              | 22             |
| Mexico - Baja California Sur | VR          | 12                      | 12                     | 12                     | 12              | 12             |
| Mexico - Baja California Sur | Other       | 22                      | 30                     | 21                     | 21              | 22             |
| Mexico - Campeche            | DHS         | 9                       | 9                      | 9                      | 9               | 9              |
| Mexico - Campeche            | VR          | 102                     | 102                    | 102                    | 102             | 102            |
| Mexico - Campeche            | Other       | 25                      | 33                     | 24                     | 24              | 24             |
| Mexico - Chiapas             | DHS         | 12                      | 12                     | 12                     | 12              | 12             |
| Mexico - Chiapas             | VR          | 114                     | 114                    | 114                    | 114             | 114            |
| Mexico - Chiapas             | Other       | 26                      | 33                     | 24                     | 24              | 24             |
| Mexico - Chihuahua           | DHS         | 9                       | 9                      | 9                      | 9               | 9              |
| Mexico - Chihuahua           | VR          | 96                      | 96                     | 96                     | 96              | 96             |
| Mexico - Chihuahua           | Other       | 23                      | 30                     | 21                     | 21              | 21             |
| Mexico - Coahuila            | DHS         | 9                       | 9                      | 9                      | 9               | 9              |
| Mexico - Coahuila            | VR          | 105                     | 105                    | 105                    | 105             | 105            |
| Mexico - Coahuila            | Other       | 21                      | 30                     | 21                     | 21              | 21             |
| Mexico - Colima              | DHS         | 9                       | 9                      | 9                      | 9               | 9              |
| Mexico - Colima              | VR          | 99                      | 99                     | 99                     | 99              | 99             |
| Mexico - Colima              | Other       | 22                      | 30                     | 21                     | 21              | 21             |
| Mexico - Durango             | DHS         | 9                       | 9                      | 9                      | 9               | 9              |
| Mexico - Durango             | VR          | 105                     | 105                    | 105                    | 105             | 105            |
| Mexico - Durango             | Other       | 21                      | 30                     | 21                     | 21              | 21             |
| Mexico - Guanajuato          | DHS         | 9                       | 9                      | 9                      | 9               | 9              |
| Mexico - Guanajuato          | VR          | 54                      | 54                     | 54                     | 54              | 54             |
| Mexico - Guanajuato          | Other       | 21                      | 30                     | 21                     | 21              | 21             |
| Mexico - Guerrero            | DHS         | 12                      | 12                     | 12                     | 12              | 12             |
| Mexico - Guerrero            | VR          | 114                     | 114                    | 114                    | 114             | 114            |
| Mexico - Guerrero            | Other       | 21                      | 30                     | 21                     | 21              | 21             |
| Mexico - Hidalgo             | DHS         | 9                       | 9                      | 9                      | 9               | 9              |
| Mexico - Hidalgo             | VR          | 102                     | 102                    | 102                    | 102             | 102            |
| Mexico - Hidalgo             | Other       | 24                      | 33                     | 24                     | 24              | 24             |
| Mexico - Jalisco             | DHS         | 12                      | 12                     | 12                     | 12              | 12             |
| Mexico - Jalisco             | VR          | 108                     | 108                    | 108                    | 108             | 108            |
| Mexico - Jalisco             | Other       | 21                      | 30                     | 21                     | 21              | 21             |
| Mexico - Mexico City         | DHS         | 12                      | 12                     | 12                     | 12              | 12             |
| Mexico - Mexico City         | VR          | 15                      | 15                     | 15                     | 15              | 15             |
| Mexico - Mexico City         | Other       | 21                      | 30                     | 21                     | 21              | 21             |
| Mexico - Michoacán de Ocampo | DHS         | 9                       | 9                      | 9                      | 9               | 9              |
| Mexico - Michoacán de Ocampo | VR          | 114                     | 114                    | 114                    | 114             | 114            |
| Mexico - Michoacán de Ocampo | Other       | 24                      | 33                     | 24                     | 24              | 24             |
| Mexico - Morelos             | DHS         | 9                       | 9                      | 9                      | 9               | 9              |
| Mexico - Morelos             | VR          | 105                     | 105                    | 105                    | 105             | 105            |
| Mexico - Morelos             | Other       | 21                      | 30                     | 21                     | 21              | 21             |
| Mexico - México              | DHS         | 9                       | 9                      | 9                      | 9               | 9              |
| Mexico - México              | VR          | 12                      | 12                     | 12                     | 12              | 12             |
| Mexico - México              | Other       | 21                      | 30                     | 21                     | 21              | 21             |
| Mexico - Nayarit             | DHS         | 9                       | 9                      | 9                      | 9               | 9              |
| Mexico - Nayarit             | VR          | 102                     | 102                    | 102                    | 102             | 102            |
| Mexico - Nayarit             | Other       | 21                      | 30                     | 21                     | 21              | 21             |
| Mexico - Nuevo León          | DHS         | 12                      | 12                     | 12                     | 12              | 12             |
| Mexico - Nuevo León          | VR          | 102                     | 102                    | 102                    | 102             | 102            |
| Mexico - Nuevo León          | Other       | 21                      | 30                     | 21                     | 21              | 22             |
| Mexico - Oaxaca              | DHS         | 9                       | 9                      | 9                      | 9               | 9              |
| Mexico - Oaxaca              | VR          | 96                      | 96                     | 96                     | 96              | 96             |

**Appendix Table 14: Number of outliers for the age-sex model by location, source type, and age group**

| Location                                 | Source Type | Outliers Early Neonatal | Outliers Late Neonatal | Outliers Post Neonatal | Outliers Infant | Outliers Child |
|------------------------------------------|-------------|-------------------------|------------------------|------------------------|-----------------|----------------|
| Mexico - Oaxaca                          | Other       | 25                      | 33                     | 24                     | 24              | 24             |
| Mexico - Puebla                          | DHS         | 9                       | 9                      | 9                      | 9               | 9              |
| Mexico - Puebla                          | VR          | 96                      | 96                     | 96                     | 96              | 96             |
| Mexico - Puebla                          | Other       | 24                      | 33                     | 24                     | 24              | 24             |
| Mexico - Querétaro                       | DHS         | 12                      | 12                     | 12                     | 12              | 12             |
| Mexico - Querétaro                       | VR          | 15                      | 15                     | 15                     | 15              | 15             |
| Mexico - Querétaro                       | Other       | 21                      | 30                     | 21                     | 21              | 21             |
| Mexico - Quintana Roo                    | VR          | 108                     | 108                    | 108                    | 108             | 108            |
| Mexico - Quintana Roo                    | Other       | 22                      | 30                     | 21                     | 21              | 21             |
| Mexico - San Luis Potosí                 | DHS         | 9                       | 9                      | 9                      | 9               | 9              |
| Mexico - San Luis Potosí                 | VR          | 114                     | 114                    | 114                    | 114             | 114            |
| Mexico - San Luis Potosí                 | Other       | 25                      | 33                     | 24                     | 24              | 24             |
| Mexico - Sinaloa                         | DHS         | 9                       | 9                      | 9                      | 9               | 9              |
| Mexico - Sinaloa                         | VR          | 102                     | 102                    | 102                    | 102             | 102            |
| Mexico - Sinaloa                         | Other       | 29                      | 33                     | 24                     | 24              | 25             |
| Mexico - Sonora                          | DHS         | 9                       | 9                      | 9                      | 9               | 9              |
| Mexico - Sonora                          | VR          | 108                     | 108                    | 108                    | 108             | 108            |
| Mexico - Sonora                          | Other       | 22                      | 30                     | 21                     | 21              | 22             |
| Mexico - Tabasco                         | DHS         | 9                       | 9                      | 9                      | 9               | 9              |
| Mexico - Tabasco                         | VR          | 102                     | 102                    | 102                    | 102             | 102            |
| Mexico - Tabasco                         | Other       | 34                      | 36                     | 27                     | 27              | 27             |
| Mexico - Tamaulipas                      | DHS         | 9                       | 9                      | 9                      | 9               | 9              |
| Mexico - Tamaulipas                      | VR          | 93                      | 93                     | 93                     | 93              | 93             |
| Mexico - Tamaulipas                      | Other       | 21                      | 30                     | 21                     | 21              | 21             |
| Mexico - Tlaxcala                        | DHS         | 9                       | 9                      | 9                      | 9               | 9              |
| Mexico - Tlaxcala                        | VR          | 12                      | 12                     | 12                     | 12              | 12             |
| Mexico - Tlaxcala                        | Other       | 24                      | 33                     | 24                     | 24              | 24             |
| Mexico - Veracruz de Ignacio de la Llave | DHS         | 12                      | 12                     | 12                     | 12              | 12             |
| Mexico - Veracruz de Ignacio de la Llave | VR          | 108                     | 108                    | 108                    | 108             | 108            |
| Mexico - Veracruz de Ignacio de la Llave | Other       | 21                      | 30                     | 21                     | 21              | 21             |
| Mexico - Yucatán                         | DHS         | 9                       | 9                      | 9                      | 9               | 9              |
| Mexico - Yucatán                         | VR          | 99                      | 99                     | 99                     | 99              | 99             |
| Mexico - Yucatán                         | Other       | 21                      | 30                     | 21                     | 21              | 21             |
| Mexico - Zacatecas                       | DHS         | 9                       | 9                      | 9                      | 9               | 9              |
| Mexico - Zacatecas                       | VR          | 105                     | 105                    | 105                    | 105             | 105            |
| Mexico - Zacatecas                       | Other       | 21                      | 30                     | 21                     | 21              | 22             |
| Moldova                                  | DHS         | 9                       | 13                     | 9                      | 9               | 9              |
| Moldova                                  | MICS        | 9                       | 13                     | 9                      | 9               | 12             |
| Moldova                                  | VR          | 102                     | 102                    | 102                    | 102             | 102            |
| Mongolia                                 | MICS        | 9                       | 9                      | 9                      | 9               | 9              |
| Mongolia                                 | RHS         | 21                      | 21                     | 21                     | 21              | 21             |
| Mongolia                                 | VR          | 60                      | 60                     | 60                     | 60              | 60             |
| Montenegro                               | VR          | 9                       | 9                      | 9                      | 9               | 10             |
| Morocco                                  | DHS         | 42                      | 42                     | 42                     | 42              | 42             |
| Morocco                                  | PAPFAM      | 24                      | 24                     | 24                     | 24              | 24             |
| Morocco                                  | VR          | 24                      | 24                     | 24                     | 24              | 24             |
| Morocco                                  | WFS         | 9                       | 9                      | 9                      | 9               | 9              |
| Morocco                                  | Other       | 9                       | 9                      | 9                      | 9               | 9              |
| Mozambique                               | DHS         | 45                      | 45                     | 45                     | 45              | 45             |
| Mozambique                               | MICS        | 12                      | 12                     | 12                     | 12              | 12             |
| Mozambique                               | RHS         | 6                       | 6                      | 6                      | 6               | 6              |
| Myanmar                                  | DHS         | 9                       | 9                      | 9                      | 9               | 9              |
| Myanmar                                  | VR          | 3                       | 3                      | 3                      | 3               | 3              |
| Namibia                                  | DHS         | 36                      | 36                     | 36                     | 36              | 36             |
| Nepal                                    | DHS         | 45                      | 45                     | 45                     | 45              | 45             |
| Nepal                                    | MICS        | 9                       | 9                      | 9                      | 9               | 9              |
| Nepal                                    | WFS         | 6                       | 6                      | 6                      | 6               | 6              |
| Nicaragua                                | DHS         | 30                      | 39                     | 30                     | 30              | 30             |
| Nicaragua                                | RHS         | 18                      | 18                     | 18                     | 18              | 18             |
| Nicaragua                                | VR          | 144                     | 144                    | 144                    | 144             | 144            |
| Niger                                    | DHS         | 36                      | 36                     | 36                     | 36              | 36             |
| Nigeria                                  | DHS         | 43                      | 45                     | 42                     | 42              | 42             |
| Nigeria                                  | MICS        | 12                      | 12                     | 12                     | 12              | 12             |
| Nigeria                                  | VR          | 3                       | 3                      | 3                      | 3               | 3              |
| Nigeria                                  | Other       | 12                      | 12                     | 12                     | 12              | 12             |
| Northern Mariana Islands                 | VR          | 16                      | 29                     | 13                     | 11              | 27             |
| Pakistan                                 | DHS         | 39                      | 39                     | 39                     | 39              | 39             |
| Pakistan                                 | LSMS        | 18                      | 18                     | 12                     | 12              | 12             |

**Appendix Table 14: Number of outliers for the age-sex model by location, source type, and age group**

| Location                         | Source Type | Outliers Early Neonatal | Outliers Late Neonatal | Outliers Post Neonatal | Outliers Infant | Outliers Child |
|----------------------------------|-------------|-------------------------|------------------------|------------------------|-----------------|----------------|
| Pakistan                         | SRS         | 15                      | 15                     | 15                     | 15              | 15             |
| Pakistan                         | WFS         | 6                       | 6                      | 6                      | 6               | 6              |
| Pakistan                         | Other       | 36                      | 36                     | 18                     | 18              | 18             |
| Palestine                        | DHS         | 9                       | 18                     | 9                      | 9               | 9              |
| Palestine                        | MICS        | 21                      | 21                     | 21                     | 21              | 21             |
| Palestine                        | VR          | 45                      | 45                     | 45                     | 45              | 45             |
| Palestine                        | Other       | 12                      | 12                     | 12                     | 12              | 12             |
| Panama                           | VR          | 12                      | 12                     | 12                     | 12              | 12             |
| Panama                           | WFS         | 6                       | 6                      | 6                      | 6               | 6              |
| Papua New Guinea                 | DHS         | 18                      | 18                     | 18                     | 18              | 18             |
| Papua New Guinea                 | VR          | 6                       | 6                      | 6                      | 6               | 6              |
| Paraguay                         | DHS         | 9                       | 9                      | 9                      | 9               | 9              |
| Paraguay                         | MICS        | 9                       | 10                     | 9                      | 9               | 9              |
| Paraguay                         | RHS         | 27                      | 28                     | 27                     | 27              | 27             |
| Paraguay                         | VR          | 144                     | 144                    | 144                    | 144             | 144            |
| Paraguay                         | WFS         | 18                      | 18                     | 18                     | 18              | 18             |
| Peru                             | DHS         | 186                     | 186                    | 186                    | 186             | 186            |
| Peru                             | VR          | 189                     | 189                    | 189                    | 189             | 189            |
| Peru                             | WFS         | 9                       | 9                      | 9                      | 9               | 9              |
| Peru                             | Other       | 42                      | 42                     | 42                     | 42              | 42             |
| Philippines                      | DHS         | 45                      | 45                     | 45                     | 45              | 45             |
| Philippines                      | VR          | 189                     | 189                    | 189                    | 189             | 189            |
| Philippines                      | WFS         | 9                       | 9                      | 9                      | 9               | 9              |
| Portugal                         | VR          | 6                       | 6                      | 6                      | 6               | 6              |
| Portugal                         | WFS         | 9                       | 9                      | 9                      | 9               | 9              |
| Puerto Rico                      | RHS         | 9                       | 9                      | 9                      | 9               | 12             |
| Qatar                            | VR          | 54                      | 54                     | 54                     | 54              | 54             |
| Romania                          | LSMS        | 18                      | 18                     | 20                     | 20              | 20             |
| Rwanda                           | DHS         | 105                     | 105                    | 105                    | 105             | 105            |
| Rwanda                           | WFS         | 9                       | 9                      | 9                      | 9               | 9              |
| Saint Lucia                      | VR          | 0                       | 2                      | 0                      | 0               | 6              |
| Saint Vincent and the Grenadines | VR          | 6                       | 9                      | 7                      | 6               | 10             |
| Samoa                            | VR          | 42                      | 42                     | 42                     | 42              | 42             |
| Sao Tome and Principe            | DHS         | 9                       | 9                      | 9                      | 9               | 9              |
| Sao Tome and Principe            | MICS        | 9                       | 9                      | 9                      | 9               | 9              |
| Saudi Arabia                     | VR          | 39                      | 39                     | 39                     | 39              | 39             |
| Senegal                          | DHS         | 81                      | 81                     | 81                     | 81              | 81             |
| Senegal                          | WFS         | 9                       | 9                      | 9                      | 9               | 9              |
| Senegal                          | Other       | 9                       | 9                      | 9                      | 9               | 9              |
| Serbia                           | VR          | 30                      | 30                     | 30                     | 30              | 30             |
| Seychelles                       | VR          | 6                       | 8                      | 7                      | 6               | 20             |
| Sierra Leone                     | DHS         | 21                      | 21                     | 21                     | 21              | 21             |
| Sierra Leone                     | VR          | 15                      | 15                     | 15                     | 15              | 15             |
| Somalia                          | MICS        | 6                       | 6                      | 6                      | 6               | 6              |
| South Africa                     | DHS         | 9                       | 9                      | 9                      | 9               | 9              |
| South Africa                     | VR          | 78                      | 78                     | 78                     | 78              | 78             |
| South Africa                     | Other       | 18                      | 18                     | 18                     | 18              | 18             |
| South Korea                      | VR          | 78                      | 78                     | 78                     | 78              | 78             |
| South Korea                      | WFS         | 6                       | 6                      | 6                      | 6               | 6              |
| South Sudan                      | MICS        | 9                       | 9                      | 9                      | 9               | 9              |
| Sri Lanka                        | DHS         | 9                       | 9                      | 9                      | 9               | 9              |
| Sri Lanka                        | VR          | 6                       | 6                      | 6                      | 6               | 6              |
| Sri Lanka                        | WFS         | 6                       | 6                      | 6                      | 6               | 6              |
| Sudan                            | DHS         | 9                       | 9                      | 9                      | 9               | 9              |
| Sudan                            | MICS        | 18                      | 18                     | 18                     | 18              | 18             |
| Sudan                            | WFS         | 9                       | 9                      | 9                      | 9               | 9              |
| Sudan                            | Other       | 12                      | 12                     | 12                     | 12              | 12             |
| Suriname                         | VR          | 165                     | 165                    | 165                    | 165             | 165            |
| Swaziland                        | DHS         | 9                       | 9                      | 9                      | 9               | 9              |
| Swaziland                        | MICS        | 18                      | 18                     | 18                     | 18              | 18             |
| Sweden                           | VR          | 3                       | 3                      | 3                      | 3               | 3              |
| Sweden - Stockholm               | VR          | 3                       | 4                      | 3                      | 3               | 3              |
| Sweden - Sweden except Stockholm | VR          | 3                       | 3                      | 3                      | 3               | 3              |
| Syria                            | PAPFAM      | 30                      | 30                     | 30                     | 30              | 30             |
| Syria                            | VR          | 54                      | 54                     | 54                     | 54              | 54             |
| Syria                            | WFS         | 9                       | 9                      | 9                      | 9               | 9              |
| Syria                            | Other       | 9                       | 9                      | 9                      | 9               | 9              |
| Tajikistan                       | DHS         | 9                       | 9                      | 9                      | 9               | 9              |

| Appendix Table 14: Number of outliers for the age-sex model by location, source type, and age group |             |                         |                        |                        |                 |                |
|-----------------------------------------------------------------------------------------------------|-------------|-------------------------|------------------------|------------------------|-----------------|----------------|
| Location                                                                                            | Source Type | Outliers Early Neonatal | Outliers Late Neonatal | Outliers Post Neonatal | Outliers Infant | Outliers Child |
| Tajikistan                                                                                          | LSMS        | 20                      | 20                     | 20                     | 20              | 20             |
| Tajikistan                                                                                          | VR          | 99                      | 99                     | 99                     | 99              | 99             |
| Tanzania                                                                                            | DHS         | 54                      | 54                     | 54                     | 54              | 54             |
| Tanzania                                                                                            | Other       | 9                       | 9                      | 9                      | 9               | 9              |
| Thailand                                                                                            | DHS         | 9                       | 9                      | 9                      | 9               | 9              |
| Thailand                                                                                            | VR          | 171                     | 171                    | 171                    | 171             | 171            |
| Thailand                                                                                            | WFS         | 6                       | 6                      | 6                      | 6               | 6              |
| The Bahamas                                                                                         | VR          | 3                       | 138                    | 5                      | 3               | 3              |
| The Gambia                                                                                          | DHS         | 9                       | 9                      | 9                      | 9               | 9              |
| Timor-Leste                                                                                         | DHS         | 21                      | 23                     | 21                     | 21              | 21             |
| Timor-Leste                                                                                         | Other       | 6                       | 6                      | 6                      | 6               | 6              |
| Togo                                                                                                | DHS         | 24                      | 24                     | 24                     | 24              | 24             |
| Tonga                                                                                               | VR          | 30                      | 30                     | 30                     | 30              | 30             |
| Trinidad and Tobago                                                                                 | DHS         | 9                       | 10                     | 9                      | 9               | 9              |
| Trinidad and Tobago                                                                                 | VR          | 96                      | 96                     | 102                    | 96              | 96             |
| Trinidad and Tobago                                                                                 | WFS         | 9                       | 9                      | 9                      | 9               | 9              |
| Tunisia                                                                                             | DHS         | 9                       | 9                      | 9                      | 9               | 9              |
| Tunisia                                                                                             | MICS        | 9                       | 9                      | 9                      | 9               | 9              |
| Tunisia                                                                                             | PAPFAM      | 9                       | 9                      | 9                      | 9               | 9              |
| Tunisia                                                                                             | VR          | 60                      | 60                     | 60                     | 60              | 60             |
| Tunisia                                                                                             | WFS         | 9                       | 9                      | 9                      | 9               | 9              |
| Tunisia                                                                                             | Other       | 12                      | 12                     | 12                     | 12              | 12             |
| Turkey                                                                                              | DHS         | 36                      | 36                     | 36                     | 36              | 36             |
| Turkey                                                                                              | VR          | 105                     | 105                    | 105                    | 105             | 105            |
| Turkey                                                                                              | WFS         | 9                       | 9                      | 9                      | 9               | 9              |
| Turkmenistan                                                                                        | MICS        | 6                       | 7                      | 6                      | 6               | 6              |
| Turkmenistan                                                                                        | VR          | 48                      | 48                     | 48                     | 48              | 48             |
| USA - Montana                                                                                       | VR          | 0                       | 1                      | 0                      | 0               | 0              |
| USA - Nevada                                                                                        | VR          | 0                       | 2                      | 0                      | 0               | 0              |
| USA - New Hampshire                                                                                 | VR          | 0                       | 0                      | 0                      | 0               | 3              |
| USA - North Dakota                                                                                  | VR          | 0                       | 4                      | 0                      | 0               | 1              |
| USA - South Dakota                                                                                  | VR          | 0                       | 1                      | 0                      | 0               | 0              |
| USA - Vermont                                                                                       | VR          | 0                       | 3                      | 1                      | 0               | 4              |
| USA - Wyoming                                                                                       | VR          | 0                       | 2                      | 0                      | 0               | 0              |
| Uganda                                                                                              | DHS         | 57                      | 57                     | 57                     | 57              | 57             |
| Uganda                                                                                              | Other       | 9                       | 9                      | 9                      | 9               | 9              |
| Ukraine                                                                                             | DHS         | 20                      | 36                     | 18                     | 18              | 18             |
| Ukraine                                                                                             | RHS         | 9                       | 18                     | 9                      | 9               | 11             |
| Ukraine                                                                                             | VR          | 81                      | 174                    | 81                     | 81              | 81             |
| United Kingdom                                                                                      | VR          | 30                      | 30                     | 30                     | 12              | 12             |
| United Kingdom - England                                                                            | VR          | 15                      | 15                     | 0                      | 0               | 0              |
| Uruguay                                                                                             | VR          | 3                       | 3                      | 3                      | 3               | 3              |
| Uzbekistan                                                                                          | DHS         | 15                      | 15                     | 15                     | 15              | 15             |
| Uzbekistan                                                                                          | VR          | 57                      | 57                     | 57                     | 57              | 57             |
| Venezuela                                                                                           | WFS         | 15                      | 15                     | 15                     | 15              | 15             |
| Vietnam                                                                                             | DHS         | 15                      | 15                     | 15                     | 15              | 15             |
| Vietnam                                                                                             | MICS        | 9                       | 10                     | 9                      | 9               | 9              |
| Virgin Islands                                                                                      | VR          | 3                       | 10                     | 3                      | 3               | 16             |
| Yemen                                                                                               | DHS         | 24                      | 24                     | 24                     | 24              | 24             |
| Yemen                                                                                               | MICS        | 9                       | 9                      | 9                      | 9               | 9              |
| Yemen                                                                                               | PAPFAM      | 9                       | 9                      | 9                      | 9               | 9              |
| Yemen                                                                                               | WFS         | 6                       | 6                      | 6                      | 6               | 6              |
| Yemen                                                                                               | Other       | 21                      | 21                     | 21                     | 21              | 21             |
| Zambia                                                                                              | DHS         | 48                      | 48                     | 48                     | 48              | 48             |
| Zambia                                                                                              | Other       | 6                       | 6                      | 6                      | 6               | 6              |
| Zimbabwe                                                                                            | DHS         | 54                      | 54                     | 54                     | 54              | 54             |
| Zimbabwe                                                                                            | MICS        | 18                      | 18                     | 18                     | 18              | 18             |
| Zimbabwe                                                                                            | VR          | 6                       | 6                      | 6                      | 6               | 6              |
