# Supplementary material for: Global, regional, and national age-sex-specific mortality and life expectancy, 1950–2017: a systematic analysis for the Global Burden of Disease Study 2017
Source: PubMed Central journal article supplement (PMC6227504; doi:10.1016/s0140-6736(18)31891-9), 2018-11-10
Supplement: mmc2.pdf [file mmc2.pdf]

# THE LANCET

## Supplementary appendix 2

This appendix formed part of the original submission and has been peer reviewed. We post it as supplied by the authors.

Supplement to: GBD 2017 Mortality Collaborators. Global, regional, and national age-sex-specific mortality and life expectancy, 1950–2017: a systematic analysis for the Global Burden of Disease Study 2017. *Lancet* 2018; **392**: 1684–735.

**Supplementary results appendix for Global, regional, and national age-specific mortality and life expectancy, 1950-2017: a systematic analysis for the Global Burden of Disease Study 2017**

## Table of Contents

|                                                                                                                                                                                                                |     |
|----------------------------------------------------------------------------------------------------------------------------------------------------------------------------------------------------------------|-----|
| <b>SR Figure 1:</b> Number of deaths over time by age group, by sex, 1950-2017.....                                                                                                                            | 3   |
| <b>SR Figure 2:</b> Comparison of life expectancy at birth by location in GBD 2016 vs GBD 2017.....                                                                                                            | 4   |
| <b>SR Figure 3:</b> Comparison of life expectancy at birth by location in GBD 2016 vs GBD 2017.....                                                                                                            | 5   |
| <b>SR Figure 4:</b> Comparison of life expectancy at birth for countries in GBD 2017 vs WPP 2017 for 1950, (a), 1960 (b), 1970 (c), 1980 (d), 1990 (e), 2000 (f), 2010 (g), 2017 (h), both sexes combined..... | 6   |
| <b>SR Table 1:</b> Age-standardised mortality rates by location, year, and sex, 1950-2017.....                                                                                                                 | 14  |
| <b>SR Table 2:</b> Under-5 death numbers by location, year, 1950-2017, both sexes.....                                                                                                                         | 35  |
| <b>SR Table 3:</b> Under-5 death numbers by location, year, 1950-2017, females.....                                                                                                                            | 42  |
| <b>SR Table 4:</b> Under-5 death numbers by location, year, 1950-2017, males.....                                                                                                                              | 49  |
| <b>SR Table 5:</b> Life expectancy at birth in 2015, by sex and location, from UN, WHO, census, and GBD 2017.....                                                                                              | 56  |
| <b>SR Table 6:</b> Estimates of life expectancy at birth by location and year, 1950-2017, both sexes.....                                                                                                      | 59  |
| <b>SR Table 7:</b> Estimates of life expectancy at birth by location and year, 1950-2017, females.....                                                                                                         | 66  |
| <b>SR Table 8:</b> Estimates of life expectancy at birth by location and year, 1950-2017, males.....                                                                                                           | 73  |
| <b>SR Table 9:</b> Estimates of life expectancy at age 65 by location and year, 1950-2017, both sexes.....                                                                                                     | 79  |
| <b>SR Table 10:</b> Estimates of life expectancy at age 65 by location and year, 1950-2017, females.....                                                                                                       | 87  |
| <b>SR Table 11:</b> Estimates of life expectancy at age 65 by location and year, 1950-2017, males.....                                                                                                         | 94  |
| <b>SR Table 12:</b> Under-5 mortality rates by location and year, 1950-2017, both sexes.....                                                                                                                   | 101 |
| <b>SR Table 13:</b> Under-5 mortality rates by location and year, 1950-2017, females.....                                                                                                                      | 108 |
| <b>SR Table 14:</b> Under-5 mortality rates by location and year, 1950-2017, males.....                                                                                                                        | 115 |
| <b>SR Table 15:</b> Ratio of adjusted to unadjusted 5q0 values for scaled locations by year.....                                                                                                               | 122 |

SR Figure 1: Number of deaths over time by age group, 1950–2017

Males

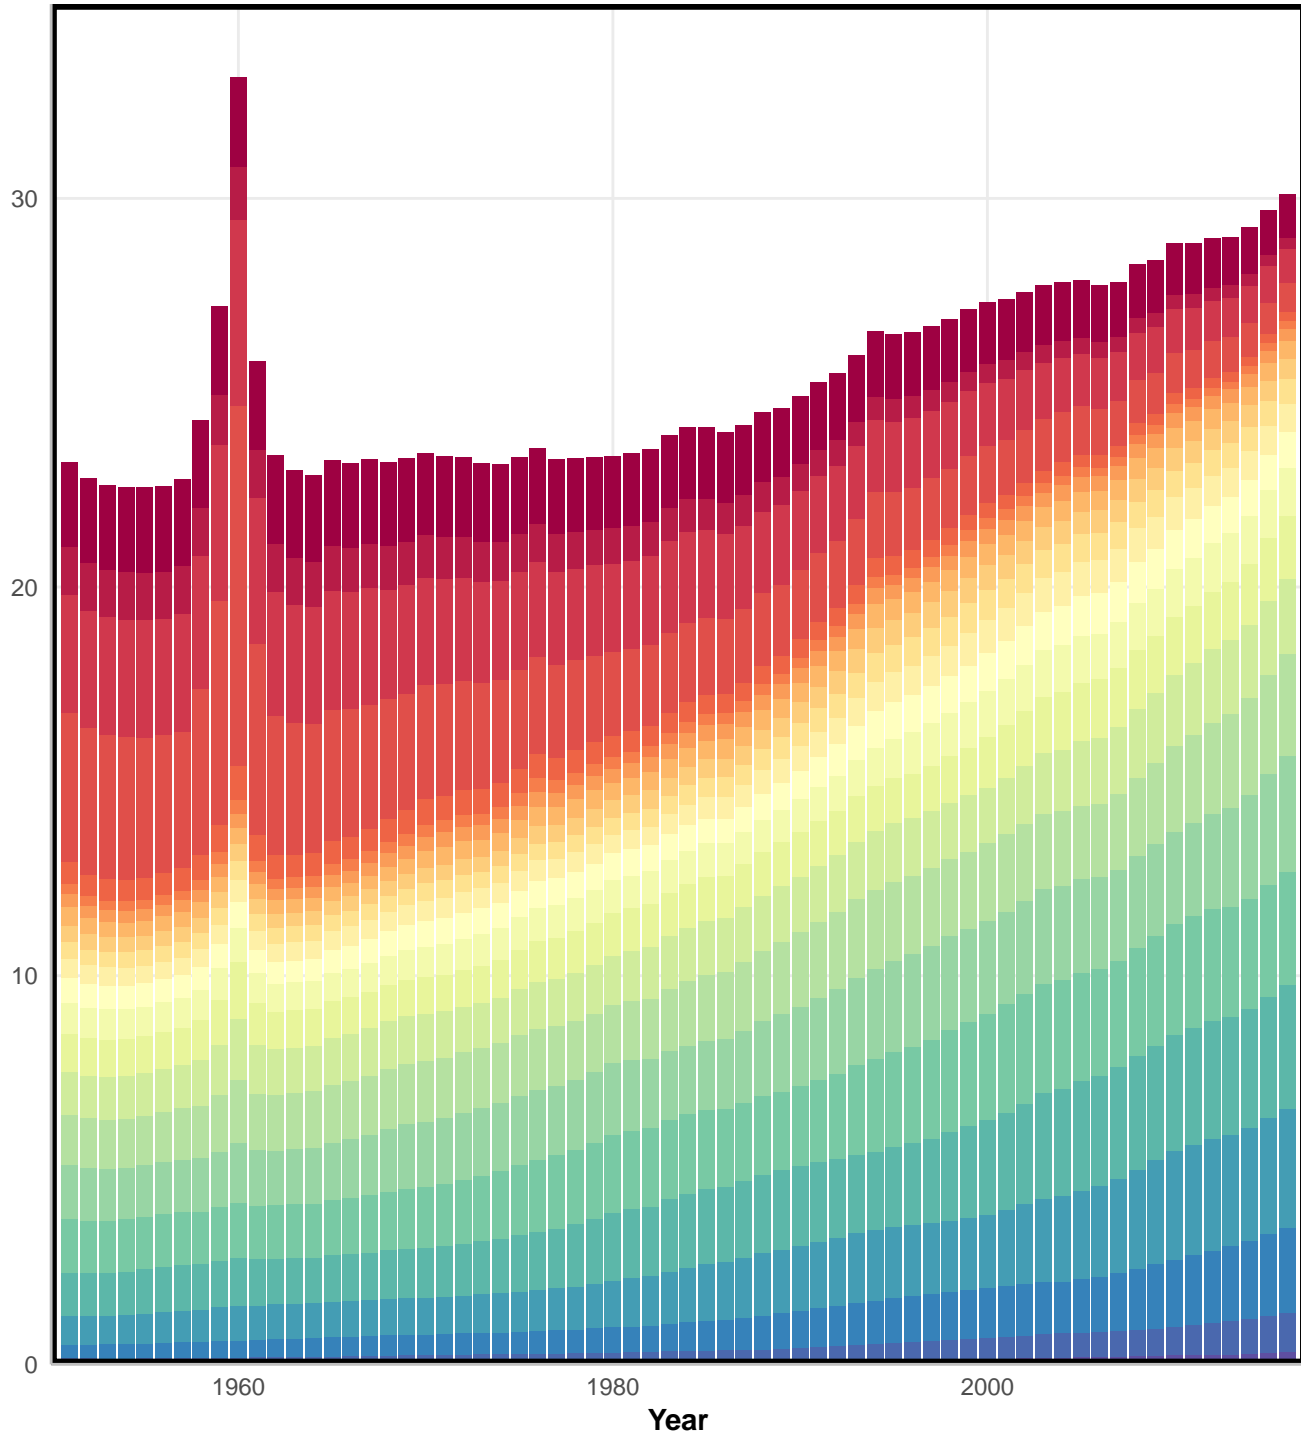

Females

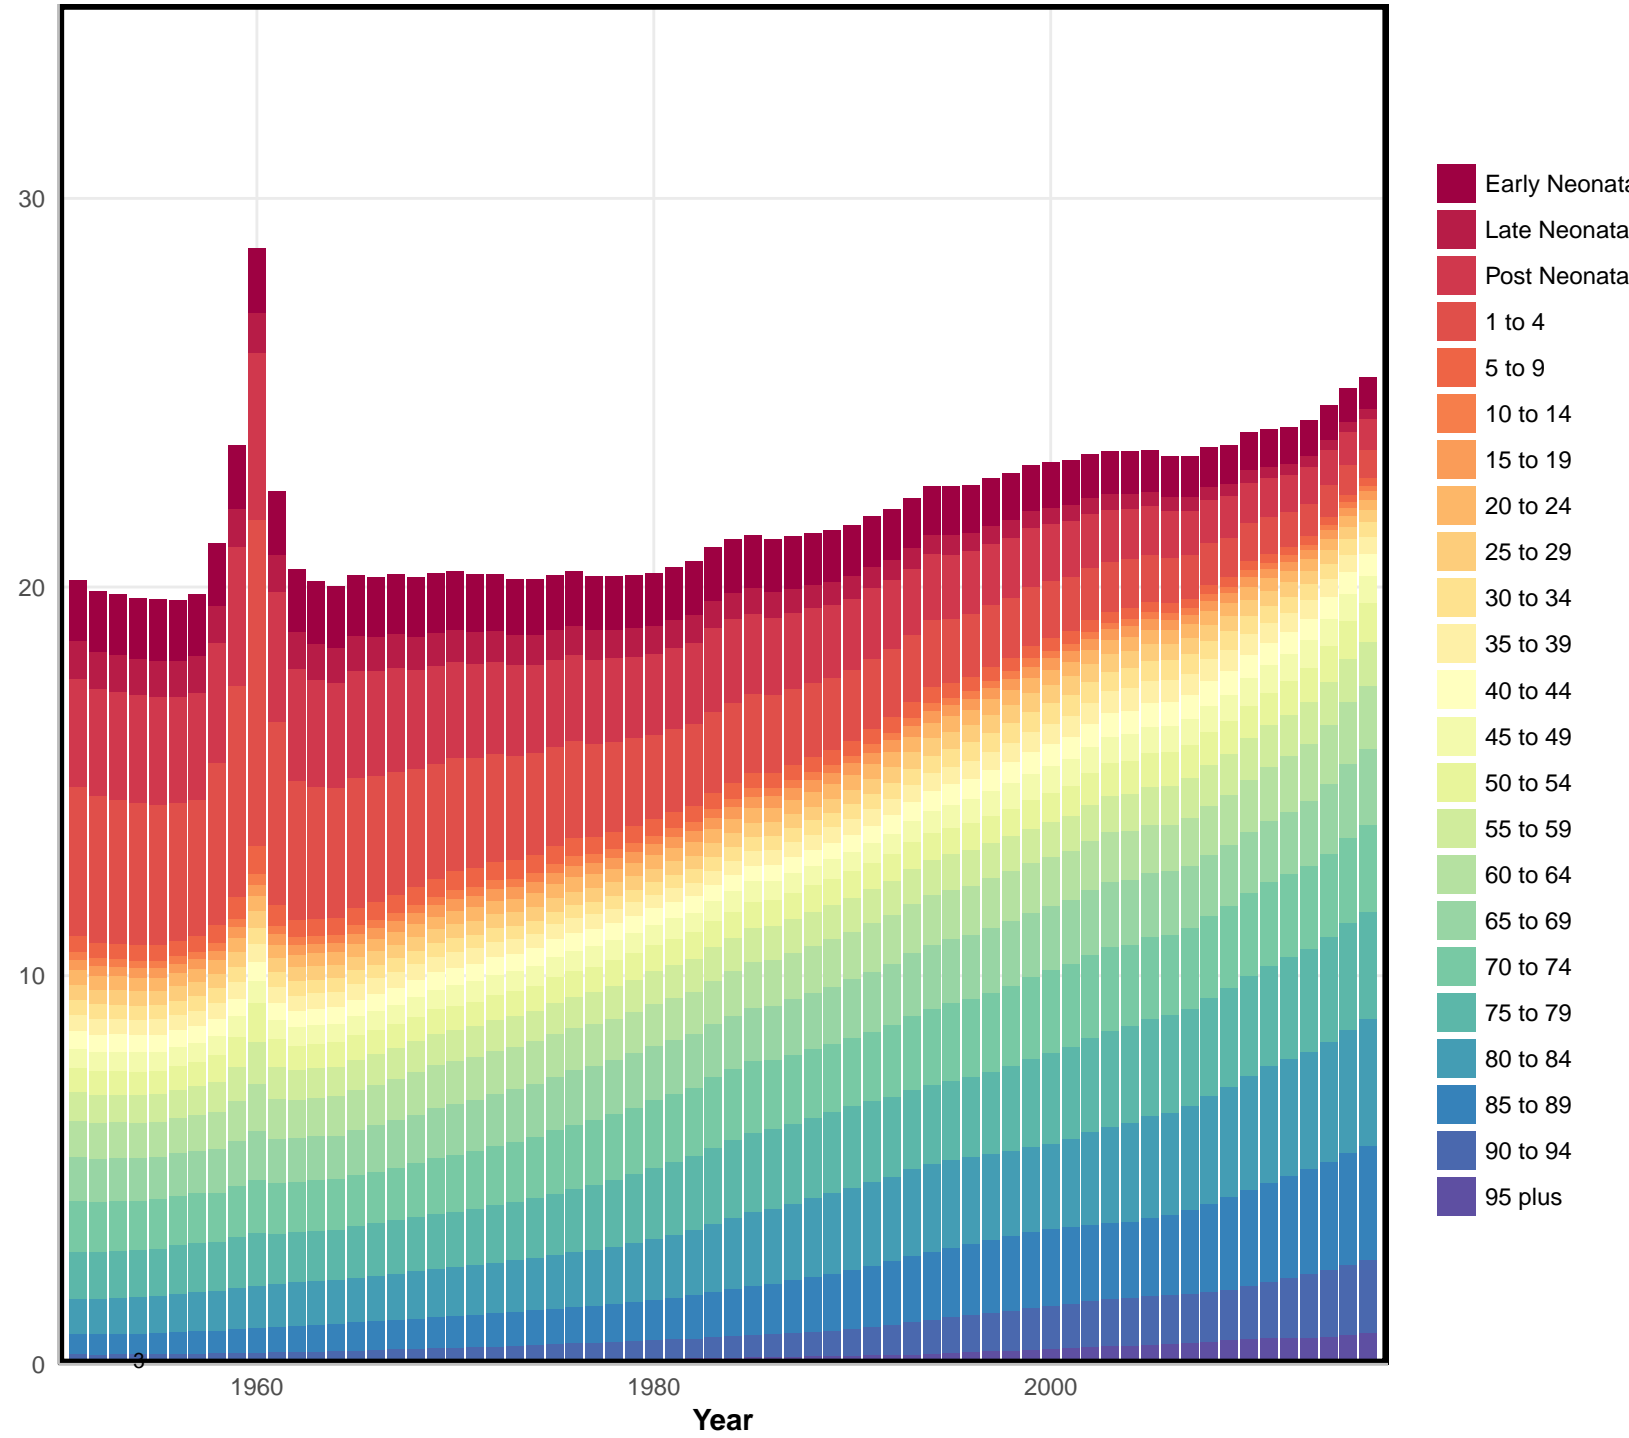

- Early Neonatal
- Late Neonatal
- Post Neonatal
- 1 to 4
- 5 to 9
- 10 to 14
- 15 to 19
- 20 to 24
- 25 to 29
- 30 to 34
- 35 to 39
- 40 to 44
- 45 to 49
- 50 to 54
- 55 to 59
- 60 to 64
- 65 to 69
- 70 to 74
- 75 to 79
- 80 to 84
- 85 to 89
- 90 to 94
- 95 plus

Figure 2 Comparison of estimates of under-5 mortality from GBD 2017 and IGME 2016

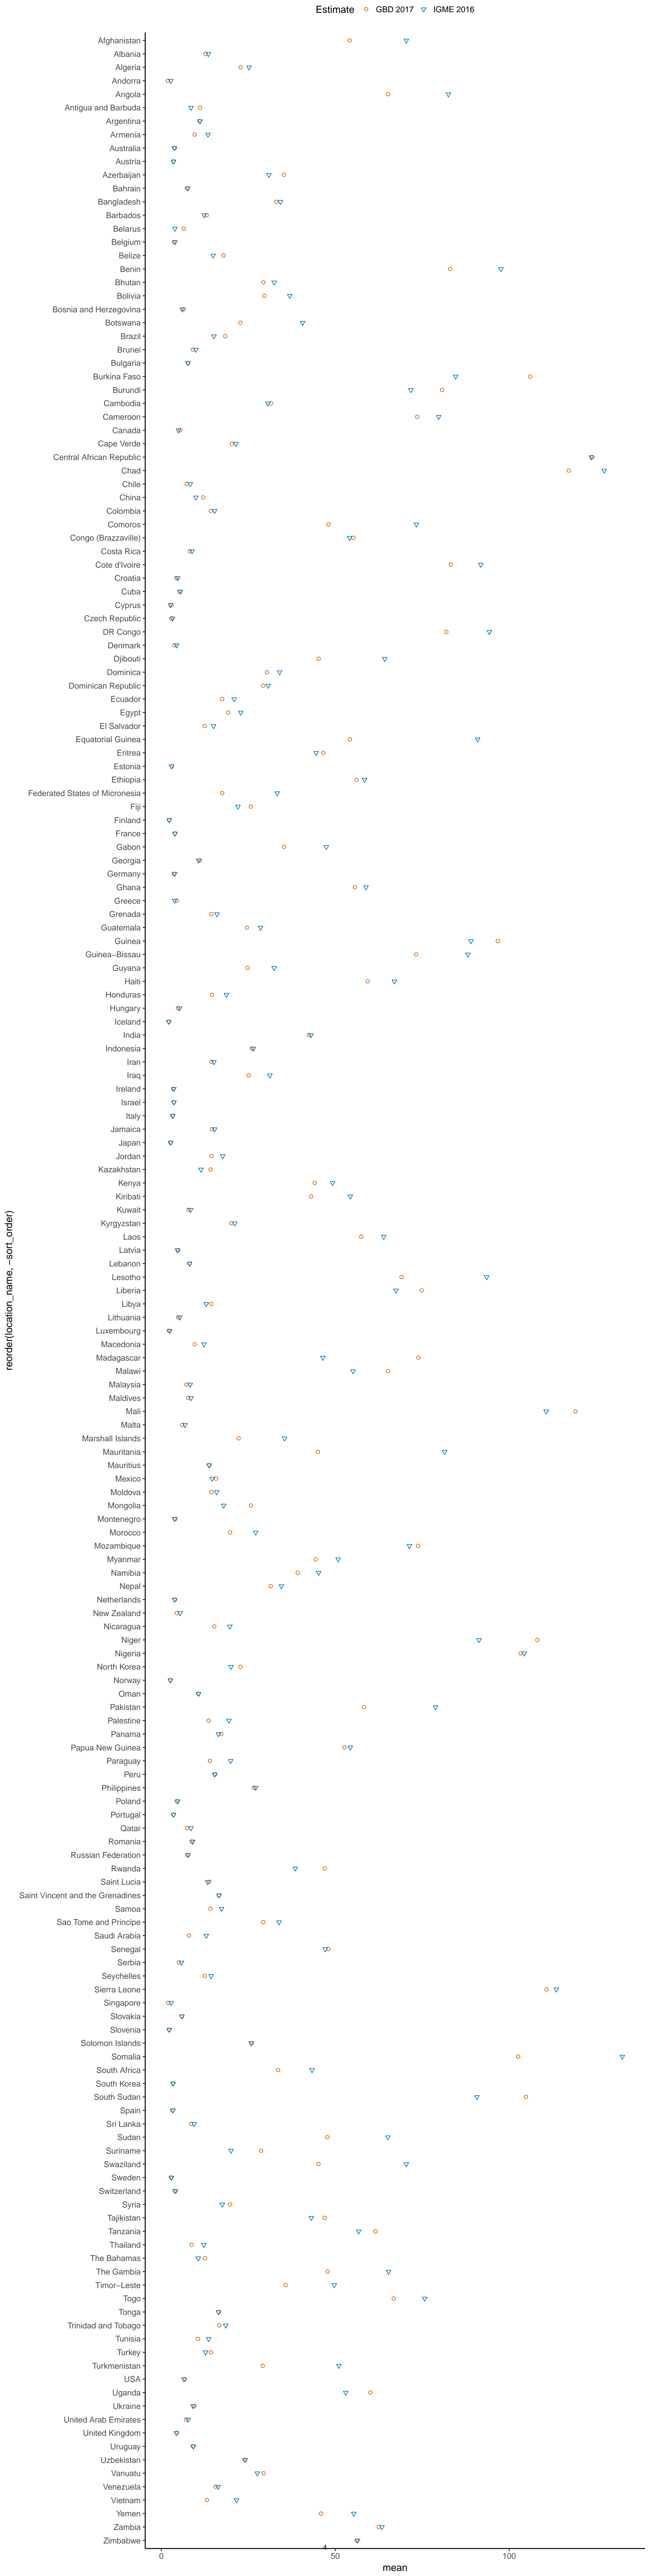

Figure 3 Comparison of life expectancy at birth by location in GBD 2016 vs GBD 2017

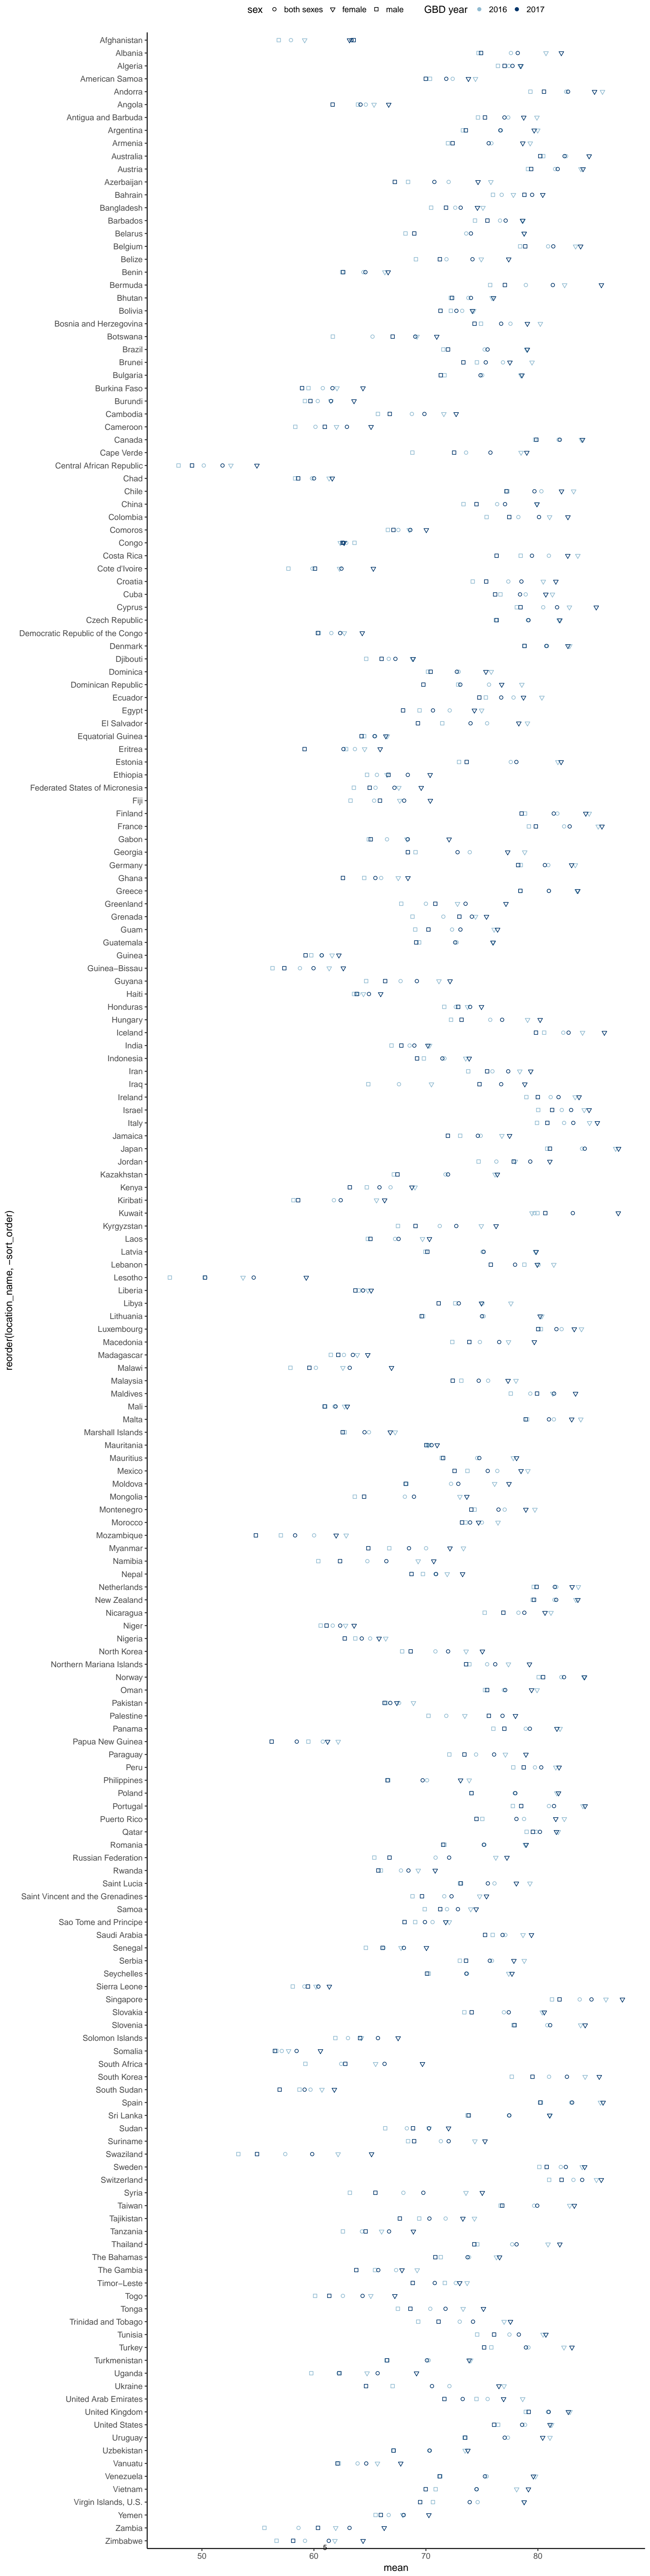

Figure 4 Comparison of life expectancy at birth for countries in GBD 2017 vs WPP 2017 for 1950, both sexes

combined CCC: 0.8615292

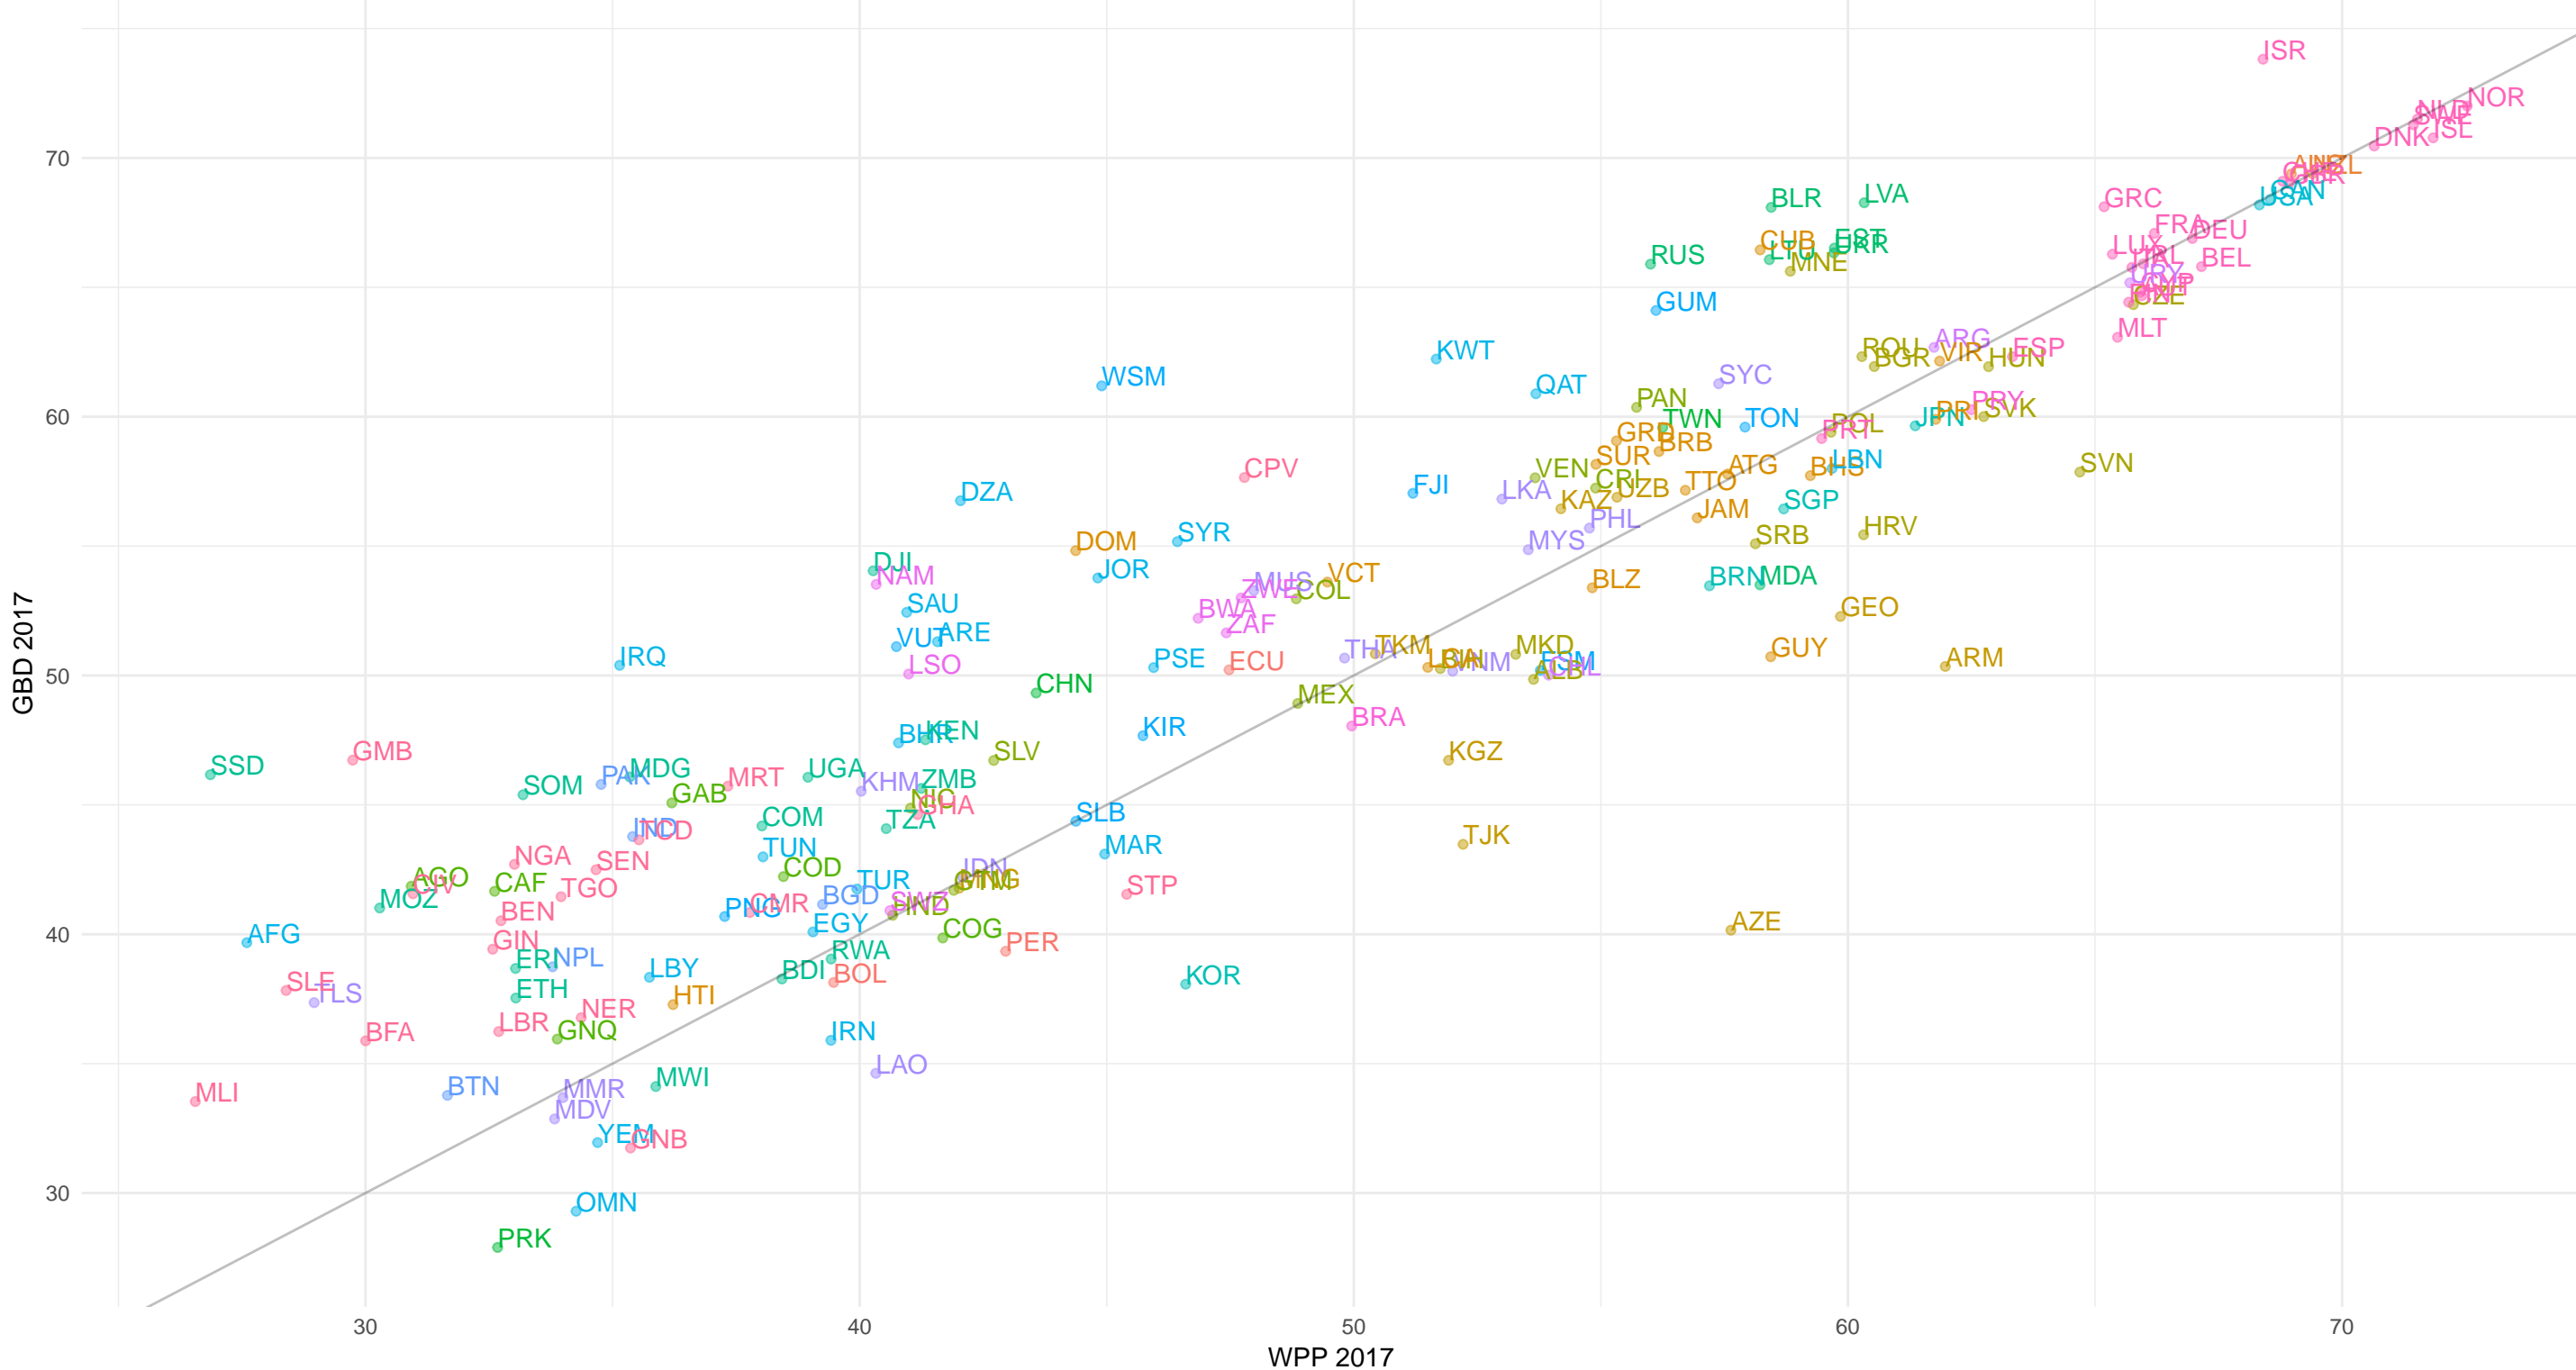

- |                                                             |                                                                   |                                                                     |                                                                    |                                                                   |
|-------------------------------------------------------------|-------------------------------------------------------------------|---------------------------------------------------------------------|--------------------------------------------------------------------|-------------------------------------------------------------------|
| <span style="color: #E377C2;">a</span> Andean Latin America | <span style="color: #9467BD;">a</span> Central Latin America      | <span style="color: #17BECF;">a</span> High-income Asia Pacific     | <span style="color: #9467BD;">a</span> Southeast Asia              | <span style="color: #E377C2;">a</span> Western Sub-Saharan Africa |
| <span style="color: #FF7F0E;">a</span> Australasia          | <span style="color: #9467BD;">a</span> Central Sub-Saharan Africa | <span style="color: #17BECF;">a</span> High-income North America    | <span style="color: #9467BD;">a</span> Southern Latin America      |                                                                   |
| <span style="color: #FF7F0E;">a</span> Caribbean            | <span style="color: #2CA02C;">a</span> East Asia                  | <span style="color: #17BECF;">a</span> North Africa and Middle East | <span style="color: #9467BD;">a</span> Southern Sub-Saharan Africa |                                                                   |
| <span style="color: #FF7F0E;">a</span> Central Asia         | <span style="color: #2CA02C;">a</span> Eastern Europe             | <span style="color: #17BECF;">a</span> Oceania                      | <span style="color: #E377C2;">a</span> Tropical Latin America      |                                                                   |
| <span style="color: #FF7F0E;">a</span> Central Europe       | <span style="color: #17BECF;">a</span> Eastern Sub-Saharan Africa | <span style="color: #17BECF;">a</span> South Asia                   | <span style="color: #E377C2;">a</span> Western Europe              |                                                                   |

# Comparison of life expectancy at birth for countries in GBD 2017 vs WPP 2017 for 1960, both sexes combined

CCC: 0.9040162

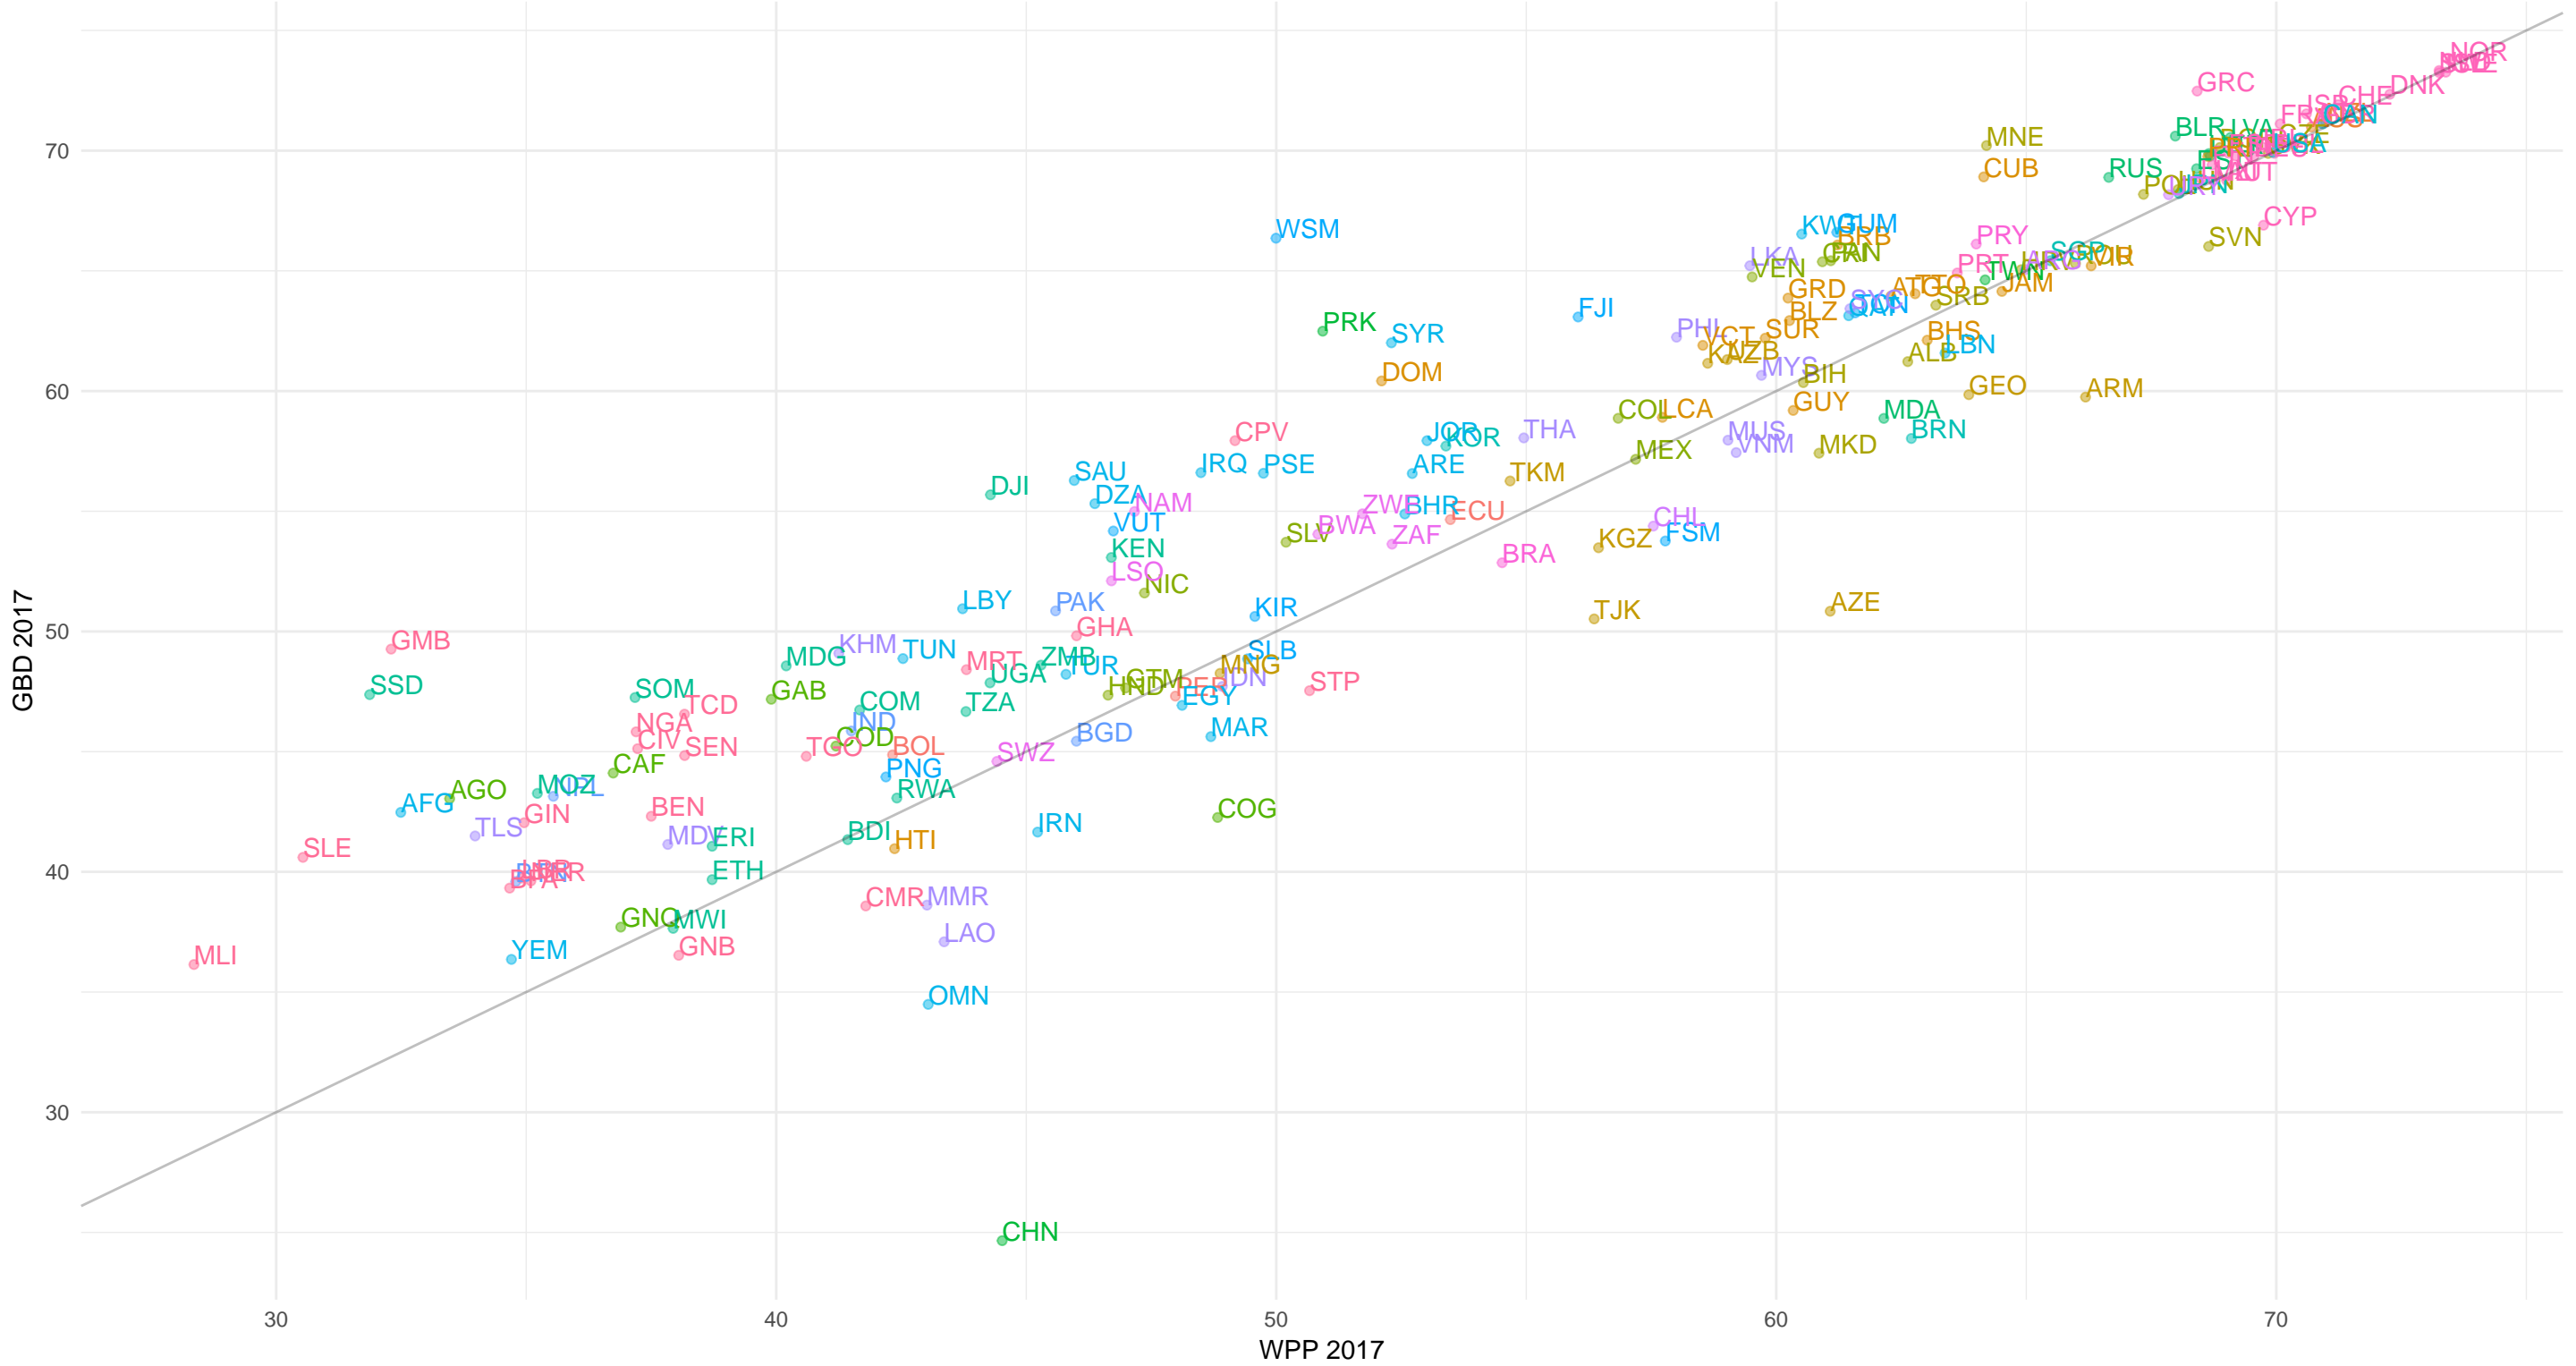

- |        |                                                             |                                                                   |                                                                     |                                                                    |                                                                   |
|--------|-------------------------------------------------------------|-------------------------------------------------------------------|---------------------------------------------------------------------|--------------------------------------------------------------------|-------------------------------------------------------------------|
| Region | <span style="color: #e31a1c;">●</span> Andean Latin America | <span style="color: #9932cc;">●</span> Central Latin America      | <span style="color: #1f77b4;">●</span> High-income Asia Pacific     | <span style="color: #9467bd;">●</span> Southeast Asia              | <span style="color: #e31a1c;">●</span> Western Sub-Saharan Africa |
|        | <span style="color: #ff7f0e;">●</span> Australasia          | <span style="color: #2ca02c;">●</span> Central Sub-Saharan Africa | <span style="color: #1f77b4;">●</span> High-income North America    | <span style="color: #9467bd;">●</span> Southern Latin America      |                                                                   |
|        | <span style="color: #ff7f0e;">●</span> Caribbean            | <span style="color: #2ca02c;">●</span> East Asia                  | <span style="color: #1f77b4;">●</span> North Africa and Middle East | <span style="color: #9467bd;">●</span> Southern Sub-Saharan Africa |                                                                   |
|        | <span style="color: #ff7f0e;">●</span> Central Asia         | <span style="color: #2ca02c;">●</span> Eastern Europe             | <span style="color: #1f77b4;">●</span> Oceania                      | <span style="color: #9467bd;">●</span> Tropical Latin America      |                                                                   |
|        | <span style="color: #ff7f0e;">●</span> Central Europe       | <span style="color: #2ca02c;">●</span> Eastern Sub-Saharan Africa | <span style="color: #1f77b4;">●</span> South Asia                   | <span style="color: #9467bd;">●</span> Western Europe              |                                                                   |



# Comparison of life expectancy at birth for countries in GBD 2017 vs WPP 2017 for 1970, both sexes combined

CCC: 0.9317709

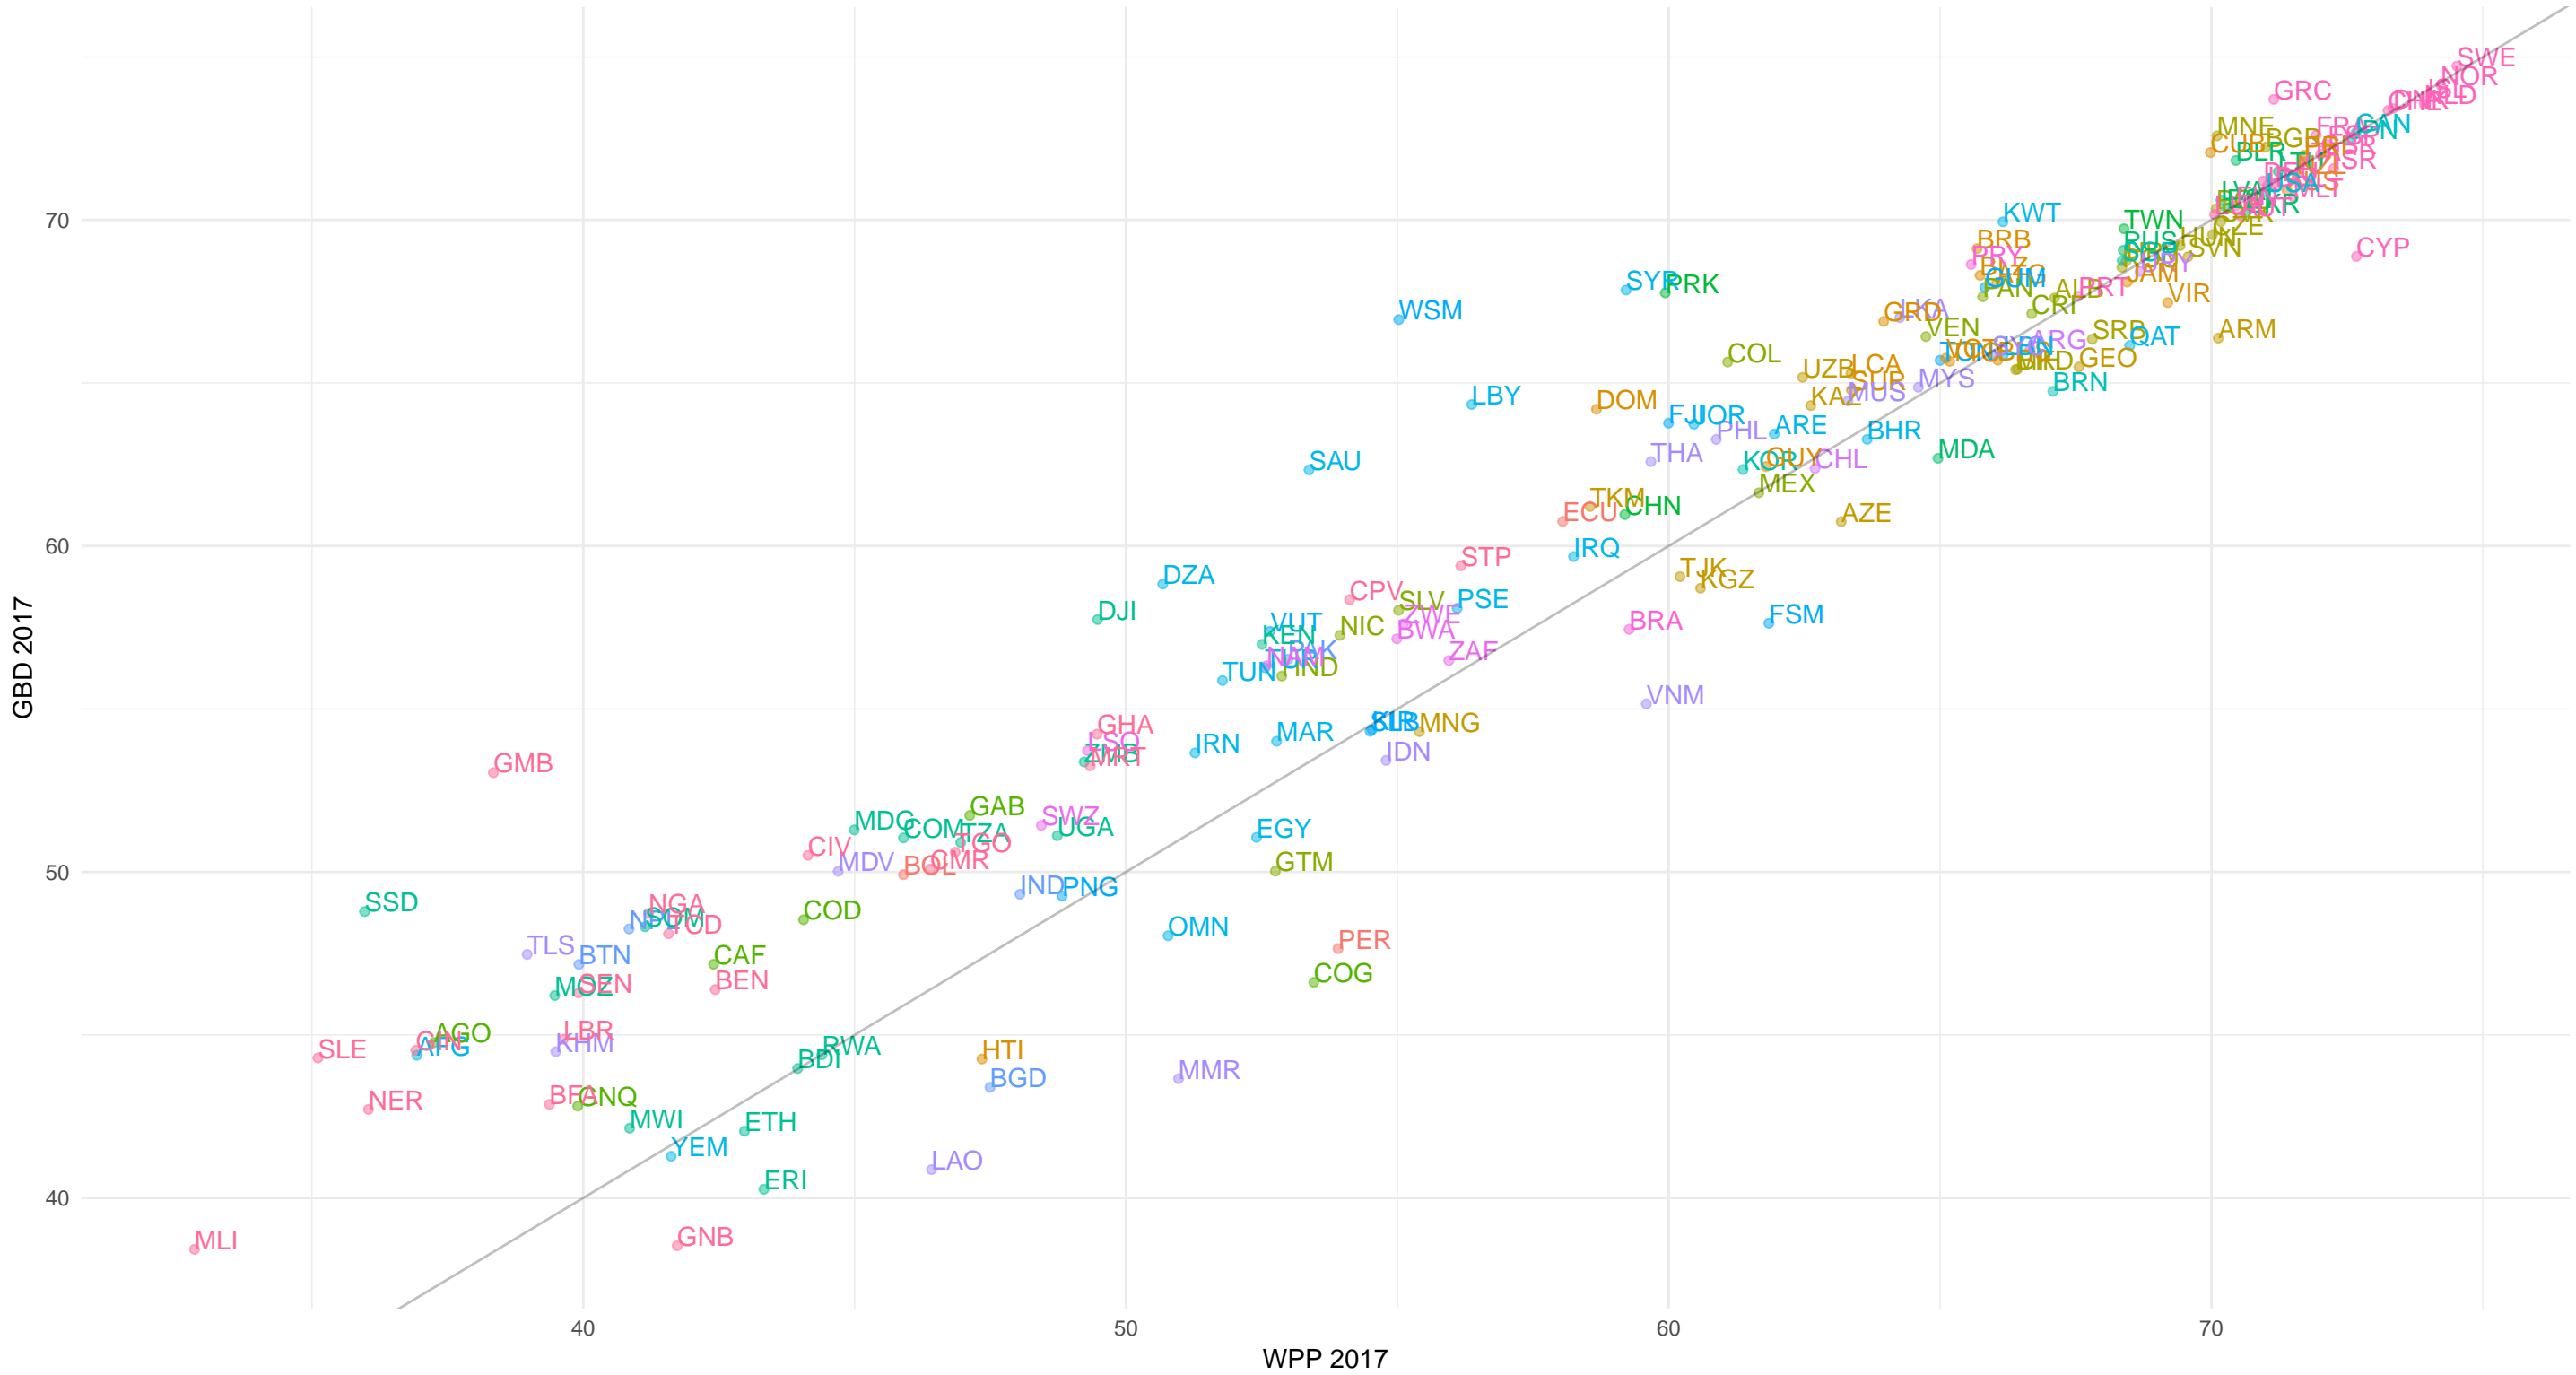

- |        |                                                             |                                                                   |                                                                     |                                                                    |                                                                   |
|--------|-------------------------------------------------------------|-------------------------------------------------------------------|---------------------------------------------------------------------|--------------------------------------------------------------------|-------------------------------------------------------------------|
| Region | <span style="color: #E377C2;">a</span> Andean Latin America | <span style="color: #2CA02C;">a</span> Central Latin America      | <span style="color: #17BECF;">a</span> High-income Asia Pacific     | <span style="color: #9467BD;">a</span> Southeast Asia              | <span style="color: #E377C2;">a</span> Western Sub-Saharan Africa |
|        | <span style="color: #FF7F0E;">a</span> Australasia          | <span style="color: #2CA02C;">a</span> Central Sub-Saharan Africa | <span style="color: #17BECF;">a</span> High-income North America    | <span style="color: #9467BD;">a</span> Southern Latin America      |                                                                   |
|        | <span style="color: #FF7F0E;">a</span> Caribbean            | <span style="color: #2CA02C;">a</span> East Asia                  | <span style="color: #17BECF;">a</span> North Africa and Middle East | <span style="color: #9467BD;">a</span> Southern Sub-Saharan Africa |                                                                   |
|        | <span style="color: #FF7F0E;">a</span> Central Asia         | <span style="color: #2CA02C;">a</span> Eastern Europe             | <span style="color: #17BECF;">a</span> Oceania                      | <span style="color: #9467BD;">a</span> Tropical Latin America      |                                                                   |
|        | <span style="color: #FF7F0E;">a</span> Central Europe       | <span style="color: #2CA02C;">a</span> Eastern Sub-Saharan Africa | <span style="color: #17BECF;">a</span> South Asia                   | <span style="color: #9467BD;">a</span> Western Europe              |                                                                   |

# Comparison of life expectancy at birth for countries in GBD 2017 vs WPP 2017 for 1980, both sexes combined

CCC: 0.9292399

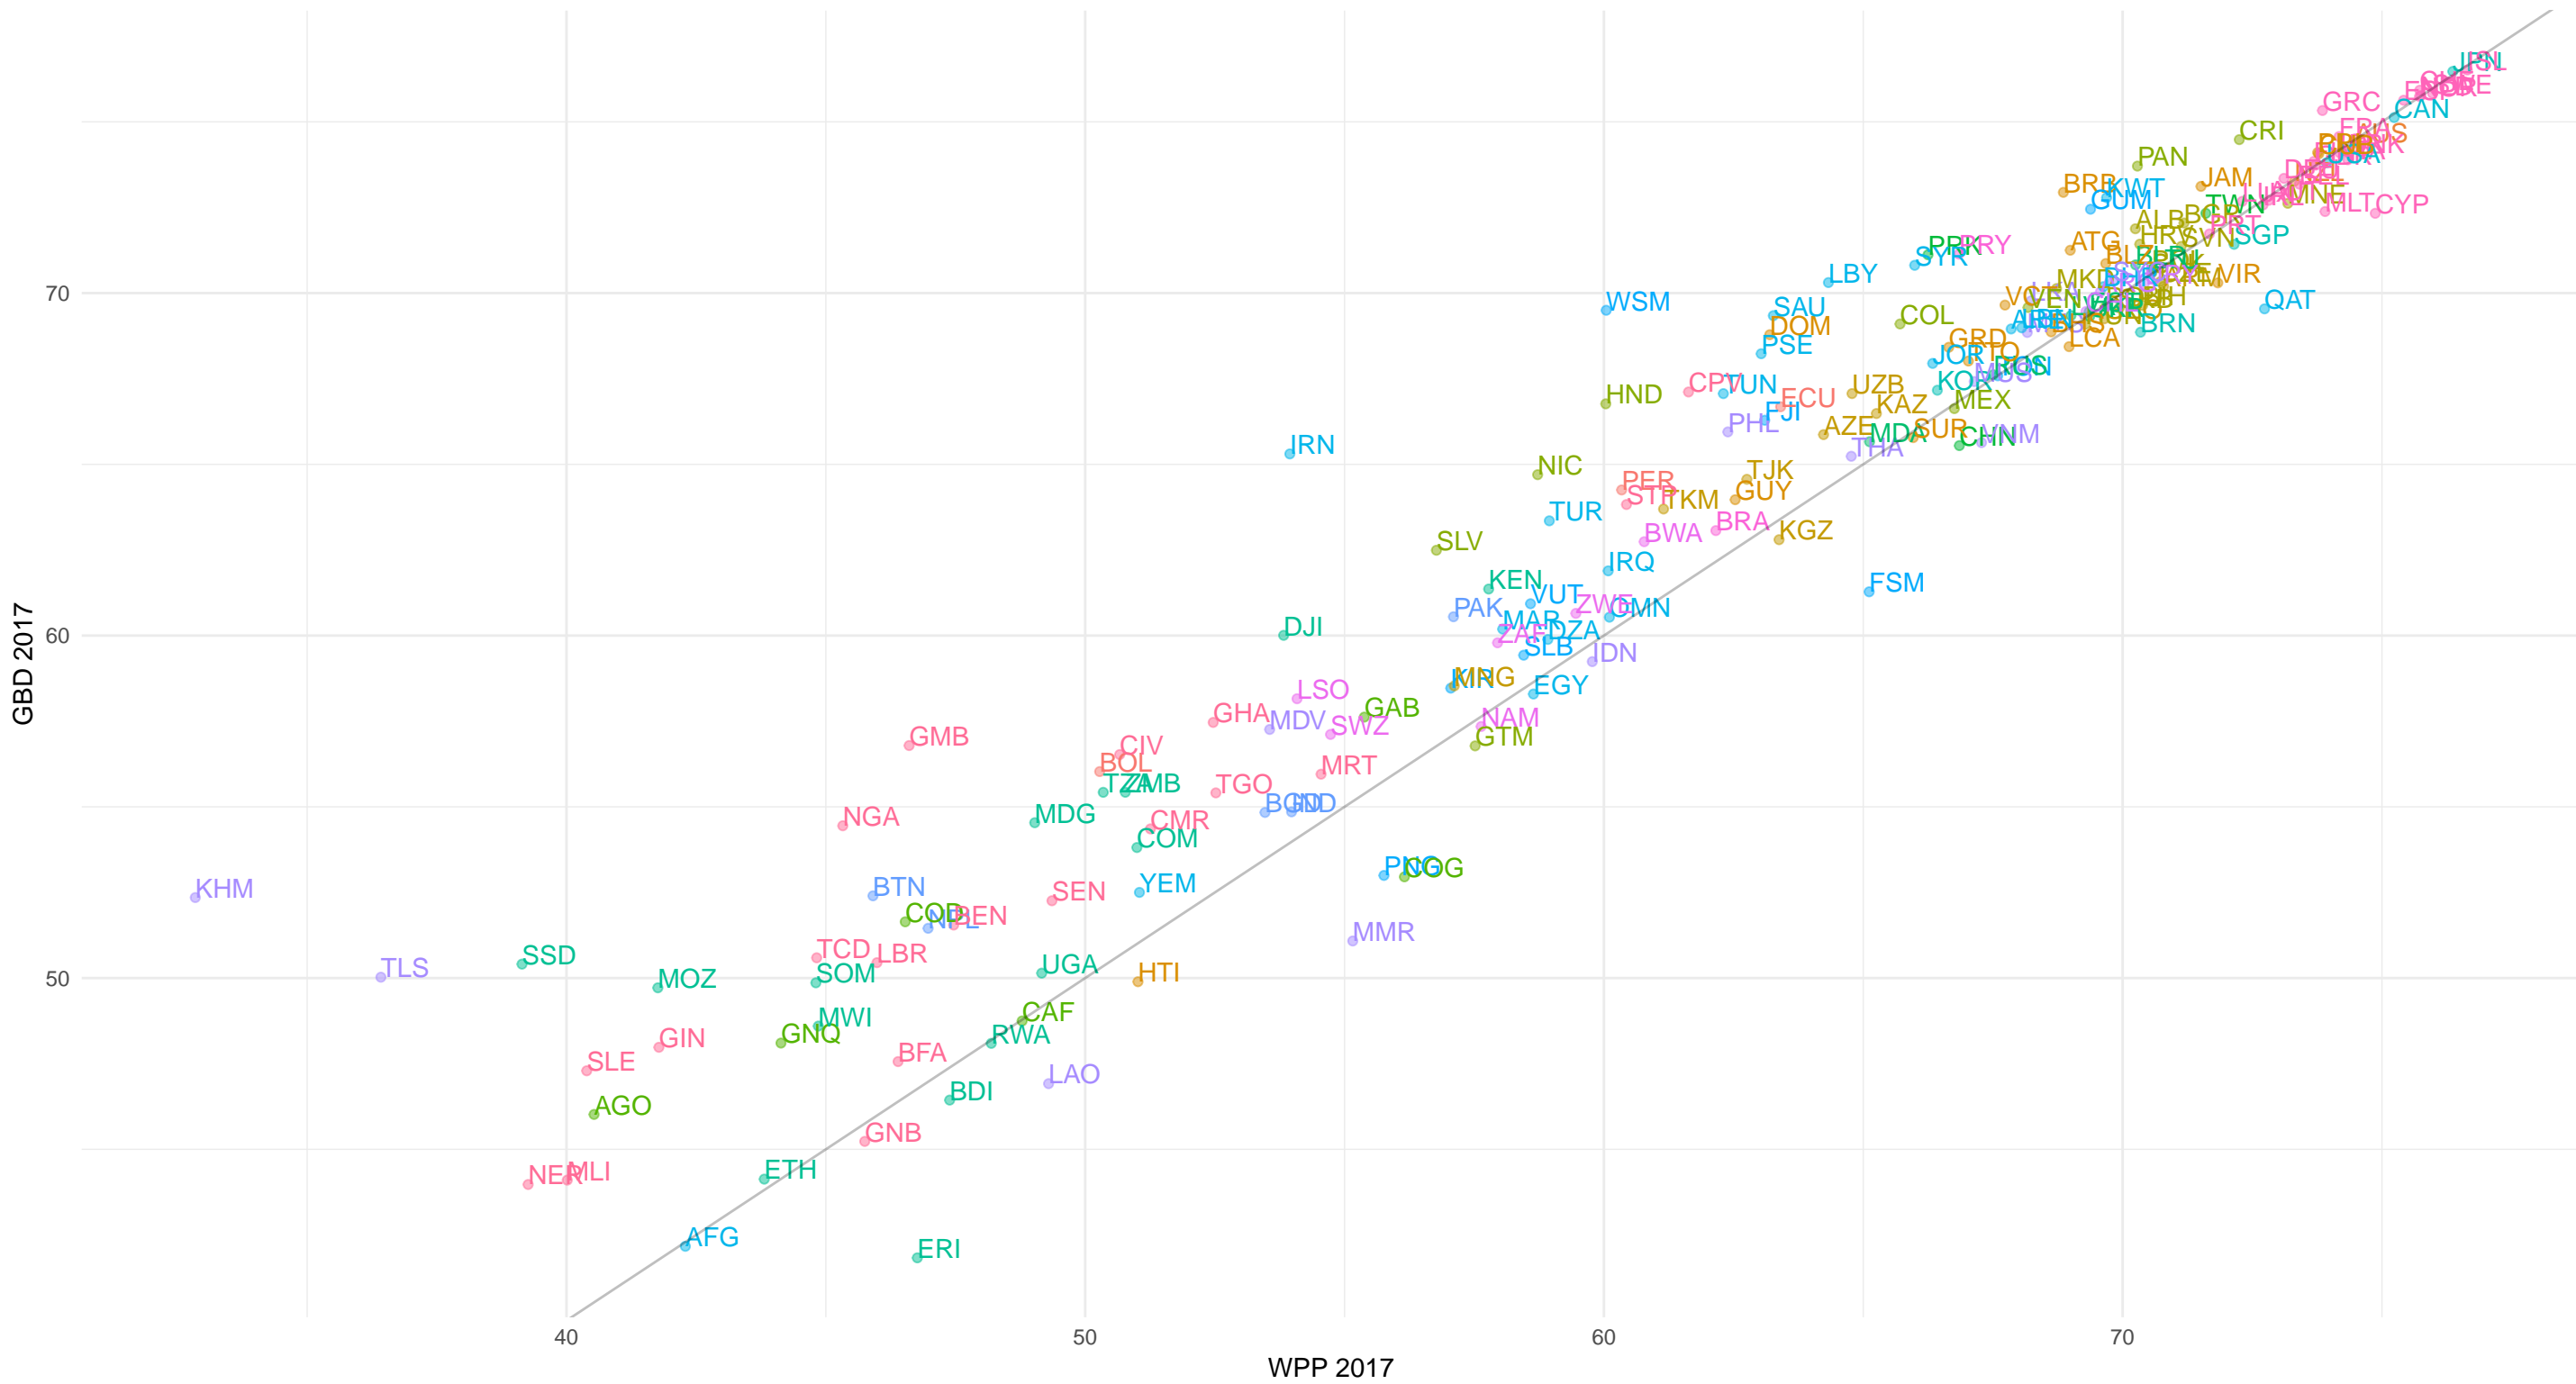

- |        |                                                             |                                                                   |                                                                     |                                                                    |                                                                   |
|--------|-------------------------------------------------------------|-------------------------------------------------------------------|---------------------------------------------------------------------|--------------------------------------------------------------------|-------------------------------------------------------------------|
| Region | <span style="color: #E377C2;">●</span> Andean Latin America | <span style="color: #2CA02C;">●</span> Central Latin America      | <span style="color: #17BECF;">●</span> High-income Asia Pacific     | <span style="color: #9467BD;">●</span> Southeast Asia              | <span style="color: #E377C2;">●</span> Western Sub-Saharan Africa |
|        | <span style="color: #FF7F0E;">●</span> Australasia          | <span style="color: #2CA02C;">●</span> Central Sub-Saharan Africa | <span style="color: #17BECF;">●</span> High-income North America    | <span style="color: #9467BD;">●</span> Southern Latin America      |                                                                   |
|        | <span style="color: #FF7F0E;">●</span> Caribbean            | <span style="color: #2CA02C;">●</span> East Asia                  | <span style="color: #17BECF;">●</span> North Africa and Middle East | <span style="color: #E377C2;">●</span> Southern Sub-Saharan Africa |                                                                   |
|        | <span style="color: #FF7F0E;">●</span> Central Asia         | <span style="color: #2CA02C;">●</span> Eastern Europe             | <span style="color: #17BECF;">●</span> Oceania                      | <span style="color: #E377C2;">●</span> Tropical Latin America      |                                                                   |
|        | <span style="color: #FF7F0E;">●</span> Central Europe       | <span style="color: #2CA02C;">●</span> Eastern Sub-Saharan Africa | <span style="color: #17BECF;">●</span> South Asia                   | <span style="color: #E377C2;">●</span> Western Europe              |                                                                   |

# Comparison of life expectancy at birth for countries in GBD 2017 vs WPP 2017 for 1990, both sexes combined

CCC: 0.9383326

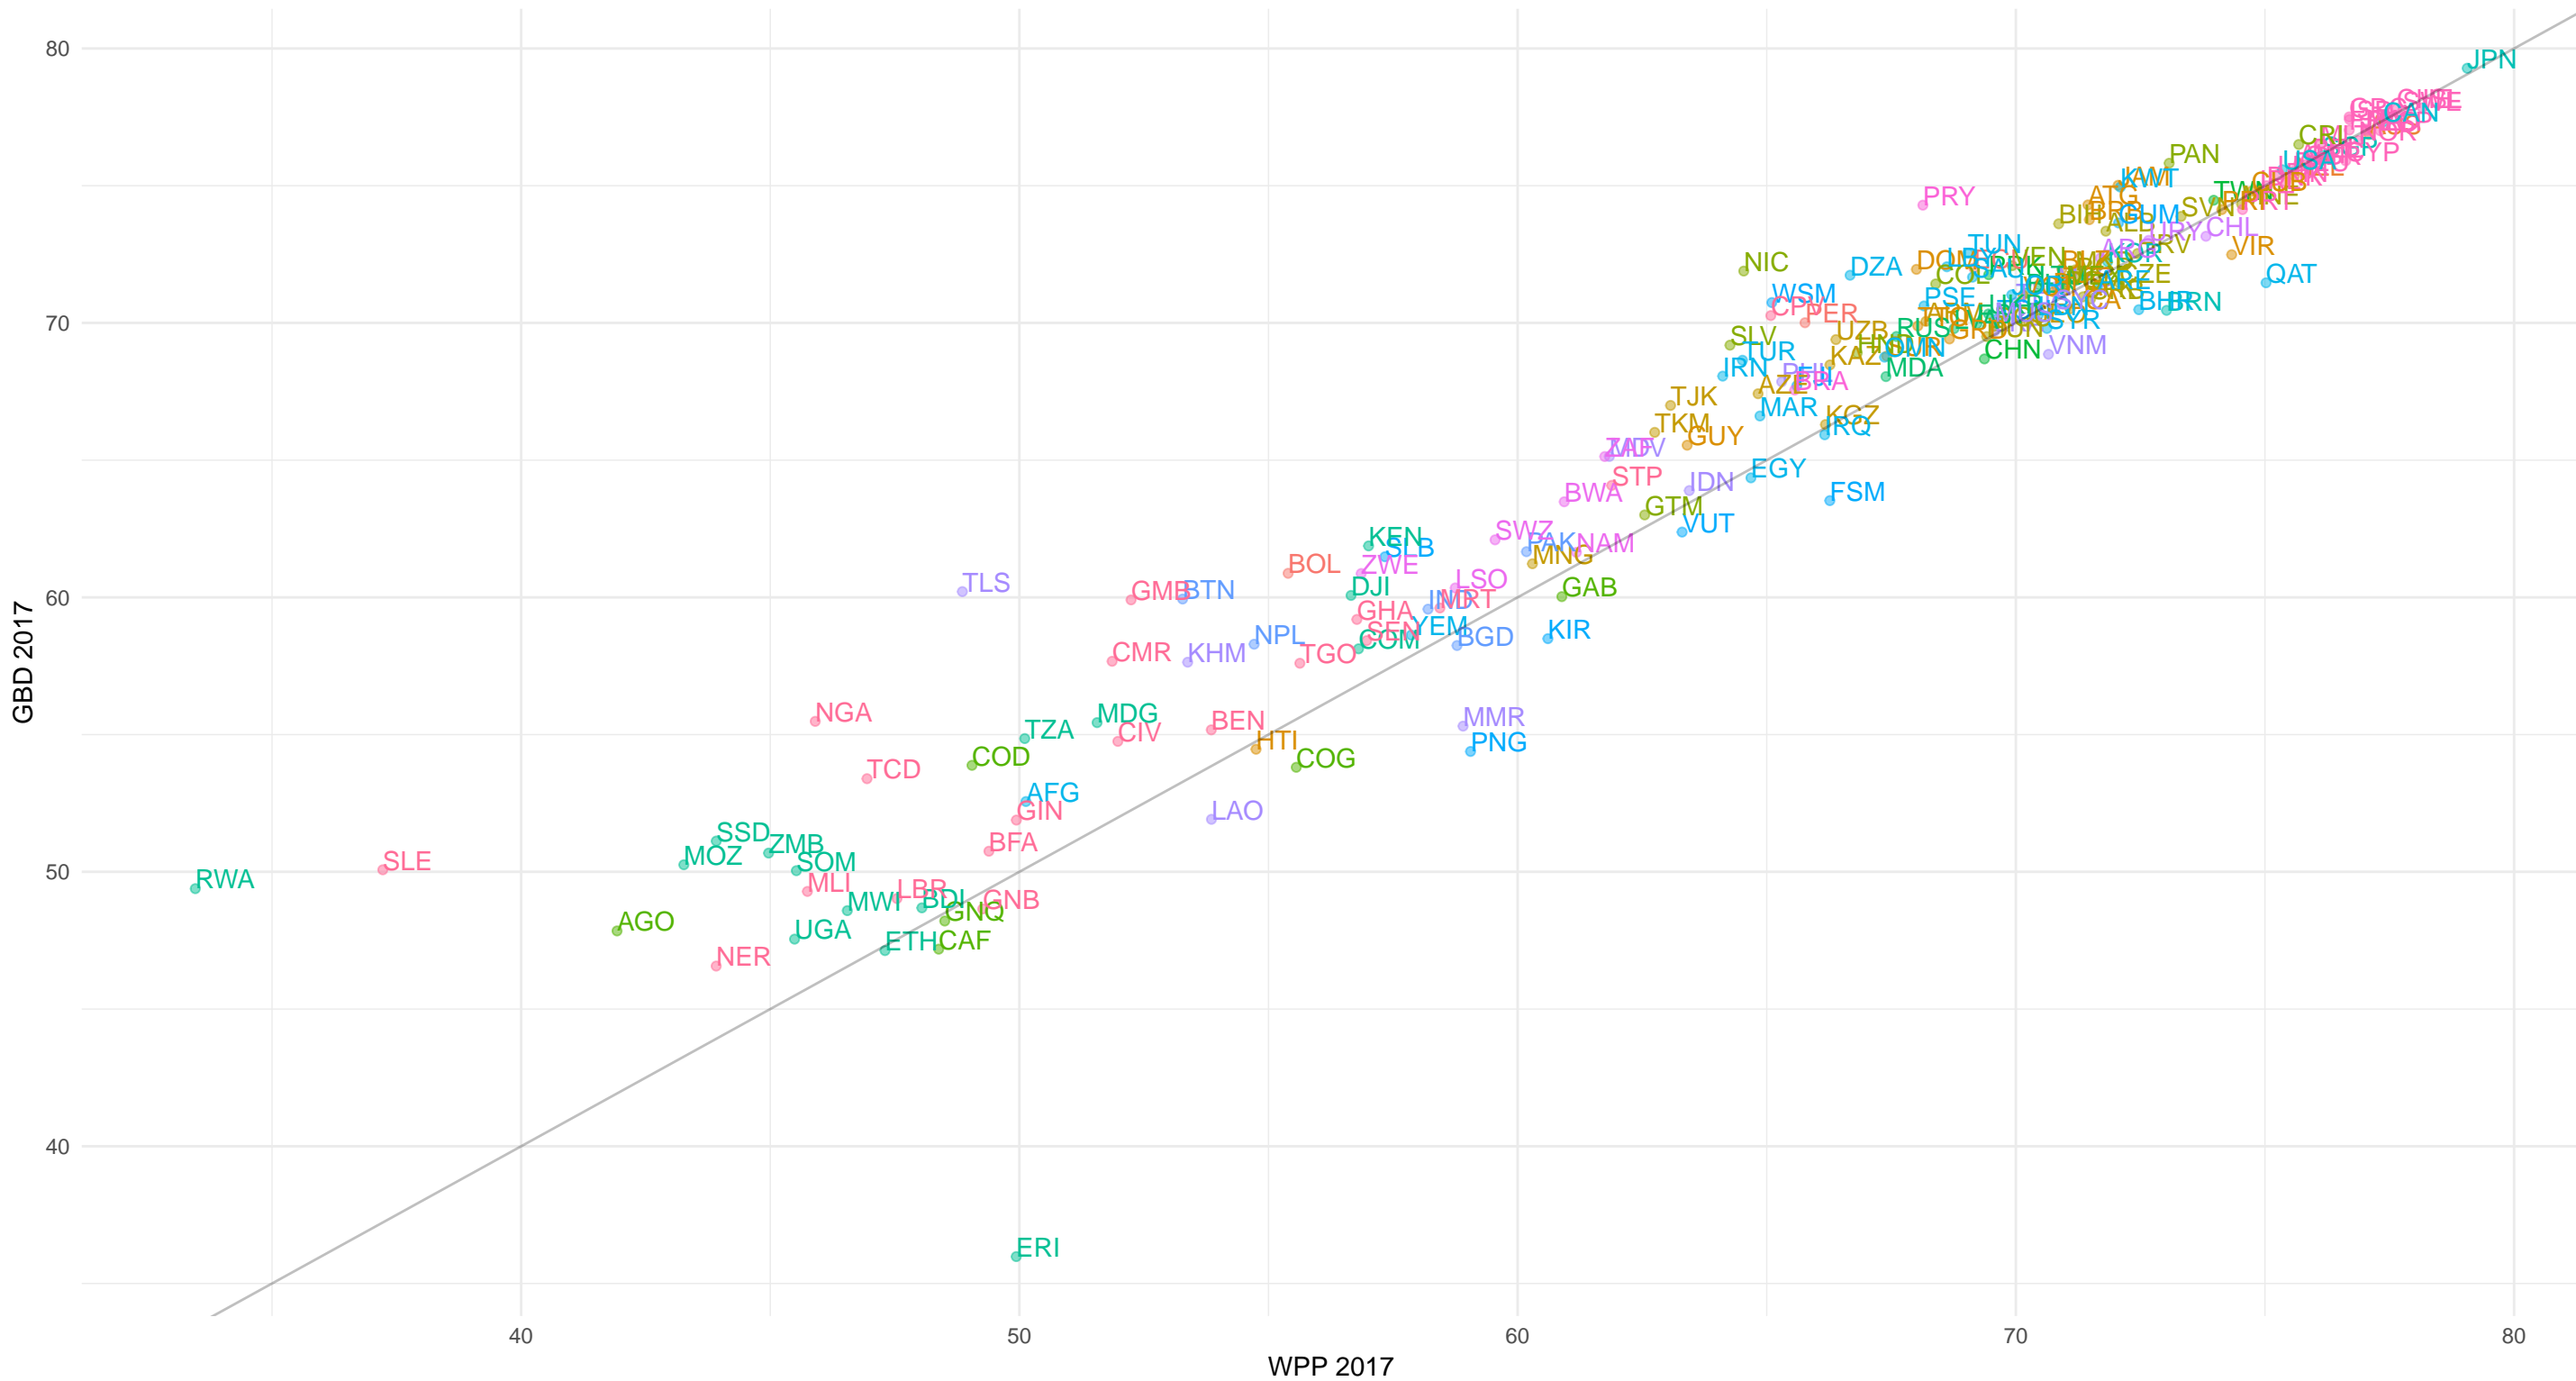

- |                                                             |                                                                   |                                                                     |                                                                    |                                                                   |
|-------------------------------------------------------------|-------------------------------------------------------------------|---------------------------------------------------------------------|--------------------------------------------------------------------|-------------------------------------------------------------------|
| <span style="color: #e31a1c;">●</span> Andean Latin America | <span style="color: #9932cc;">●</span> Central Latin America      | <span style="color: #1f77b4;">●</span> High-income Asia Pacific     | <span style="color: #9467bd;">●</span> Southeast Asia              | <span style="color: #e31a1c;">●</span> Western Sub-Saharan Africa |
| <span style="color: #ff7f0e;">●</span> Australasia          | <span style="color: #2ca02c;">●</span> Central Sub-Saharan Africa | <span style="color: #1f77b4;">●</span> High-income North America    | <span style="color: #9467bd;">●</span> Southern Latin America      |                                                                   |
| <b>Region</b>                                               | <span style="color: #2ca02c;">●</span> East Asia                  | <span style="color: #1f77b4;">●</span> North Africa and Middle East | <span style="color: #9932cc;">●</span> Southern Sub-Saharan Africa |                                                                   |
| <span style="color: #ff7f0e;">●</span> Caribbean            | <span style="color: #2ca02c;">●</span> Eastern Europe             | <span style="color: #1f77b4;">●</span> Oceania                      | <span style="color: #9932cc;">●</span> Tropical Latin America      |                                                                   |
| <span style="color: #ff7f0e;">●</span> Central Asia         | <span style="color: #2ca02c;">●</span> Eastern Sub-Saharan Africa | <span style="color: #1f77b4;">●</span> South Asia                   | <span style="color: #9932cc;">●</span> Western Europe              |                                                                   |
| <span style="color: #ff7f0e;">●</span> Central Europe       |                                                                   |                                                                     |                                                                    |                                                                   |

# Comparison of life expectancy at birth for countries in GBD 2017 vs WPP 2017 for 2000, both sexes combined

CCC: 0.9699195

GBD 2017

40

50

60

70

80

WPP 2017

Region

- |                                                             |                                                                   |                                                                     |                                                                    |                                                                   |
|-------------------------------------------------------------|-------------------------------------------------------------------|---------------------------------------------------------------------|--------------------------------------------------------------------|-------------------------------------------------------------------|
| <span style="color: #e31a1c;">●</span> Andean Latin America | <span style="color: #99ac33;">●</span> Central Latin America      | <span style="color: #1f77b4;">●</span> High-income Asia Pacific     | <span style="color: #9467bd;">●</span> Southeast Asia              | <span style="color: #e31a1c;">●</span> Western Sub-Saharan Africa |
| <span style="color: #e31a1c;">●</span> Australasia          | <span style="color: #99ac33;">●</span> Central Sub-Saharan Africa | <span style="color: #1f77b4;">●</span> High-income North America    | <span style="color: #9467bd;">●</span> Southern Latin America      |                                                                   |
| <span style="color: #e31a1c;">●</span> Caribbean            | <span style="color: #2ca02c;">●</span> East Asia                  | <span style="color: #1f77b4;">●</span> North Africa and Middle East | <span style="color: #9467bd;">●</span> Southern Sub-Saharan Africa |                                                                   |
| <span style="color: #e31a1c;">●</span> Central Asia         | <span style="color: #2ca02c;">●</span> Eastern Europe             | <span style="color: #1f77b4;">●</span> Oceania                      | <span style="color: #9467bd;">●</span> Tropical Latin America      |                                                                   |
| <span style="color: #e31a1c;">●</span> Central Europe       | <span style="color: #2ca02c;">●</span> Eastern Sub-Saharan Africa | <span style="color: #1f77b4;">●</span> South Asia                   | <span style="color: #9467bd;">●</span> Western Europe              |                                                                   |

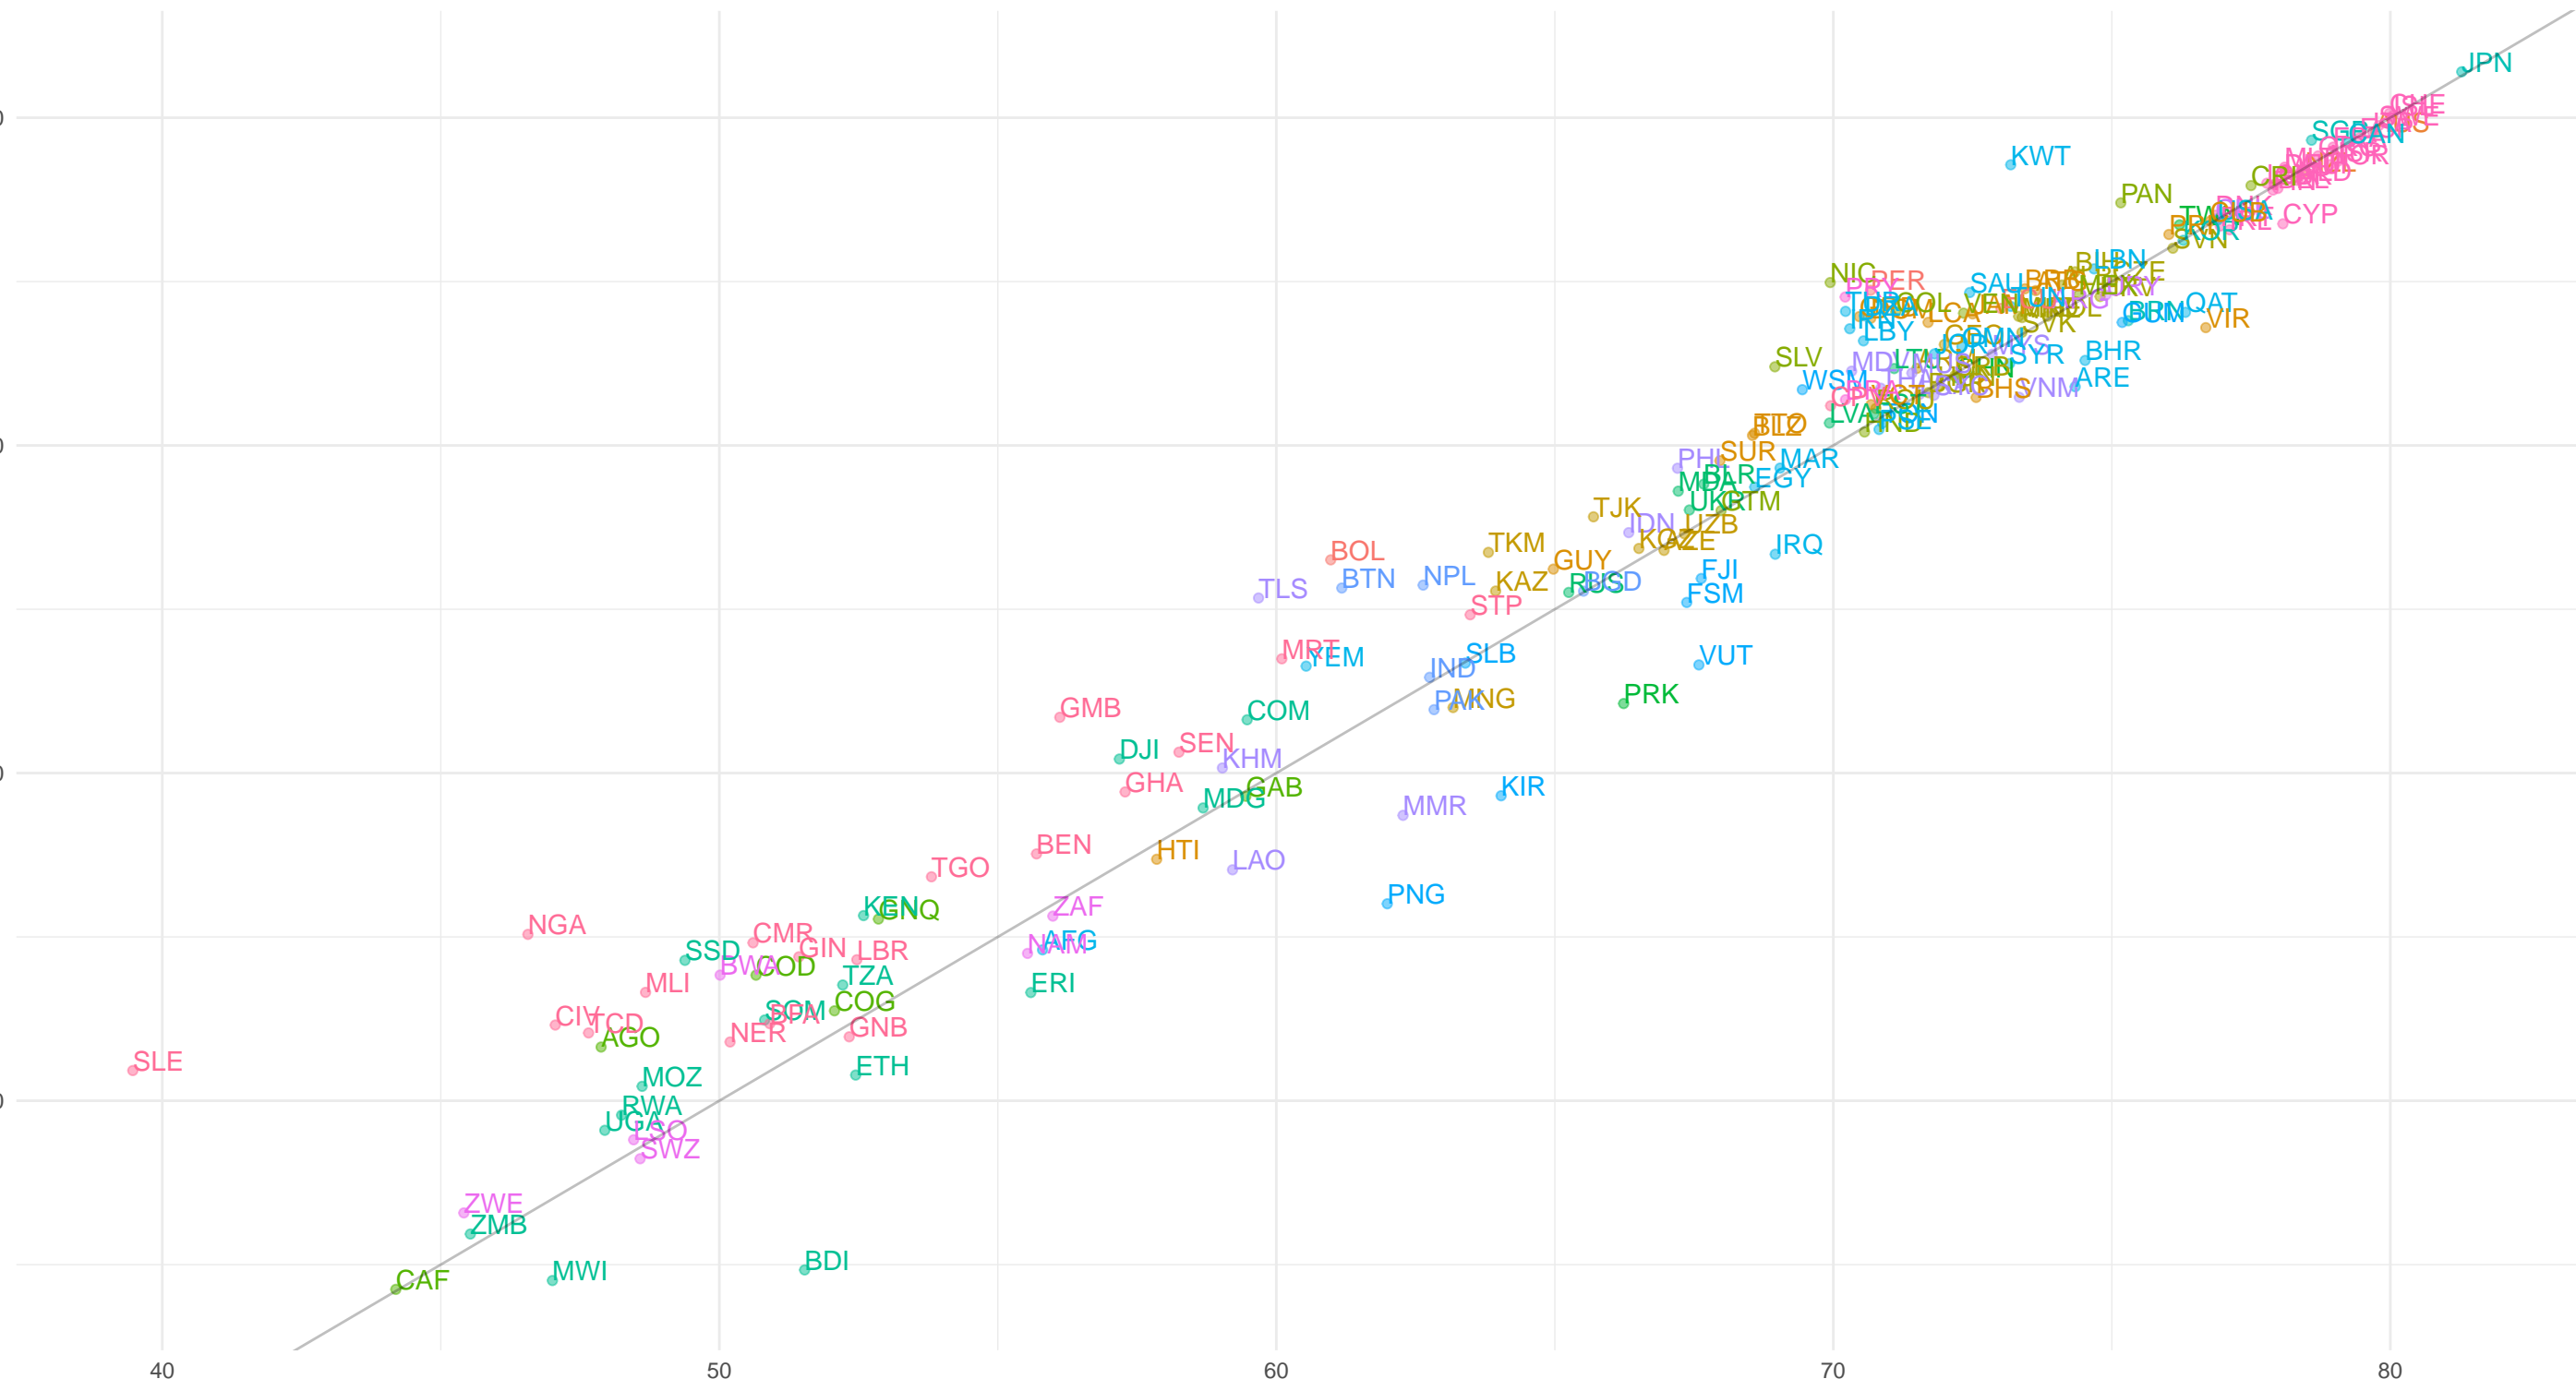

# Comparison of life expectancy at birth for countries in GBD 2017 vs WPP 2017 for 2010, both sexes combined

CCC: 0.9310077

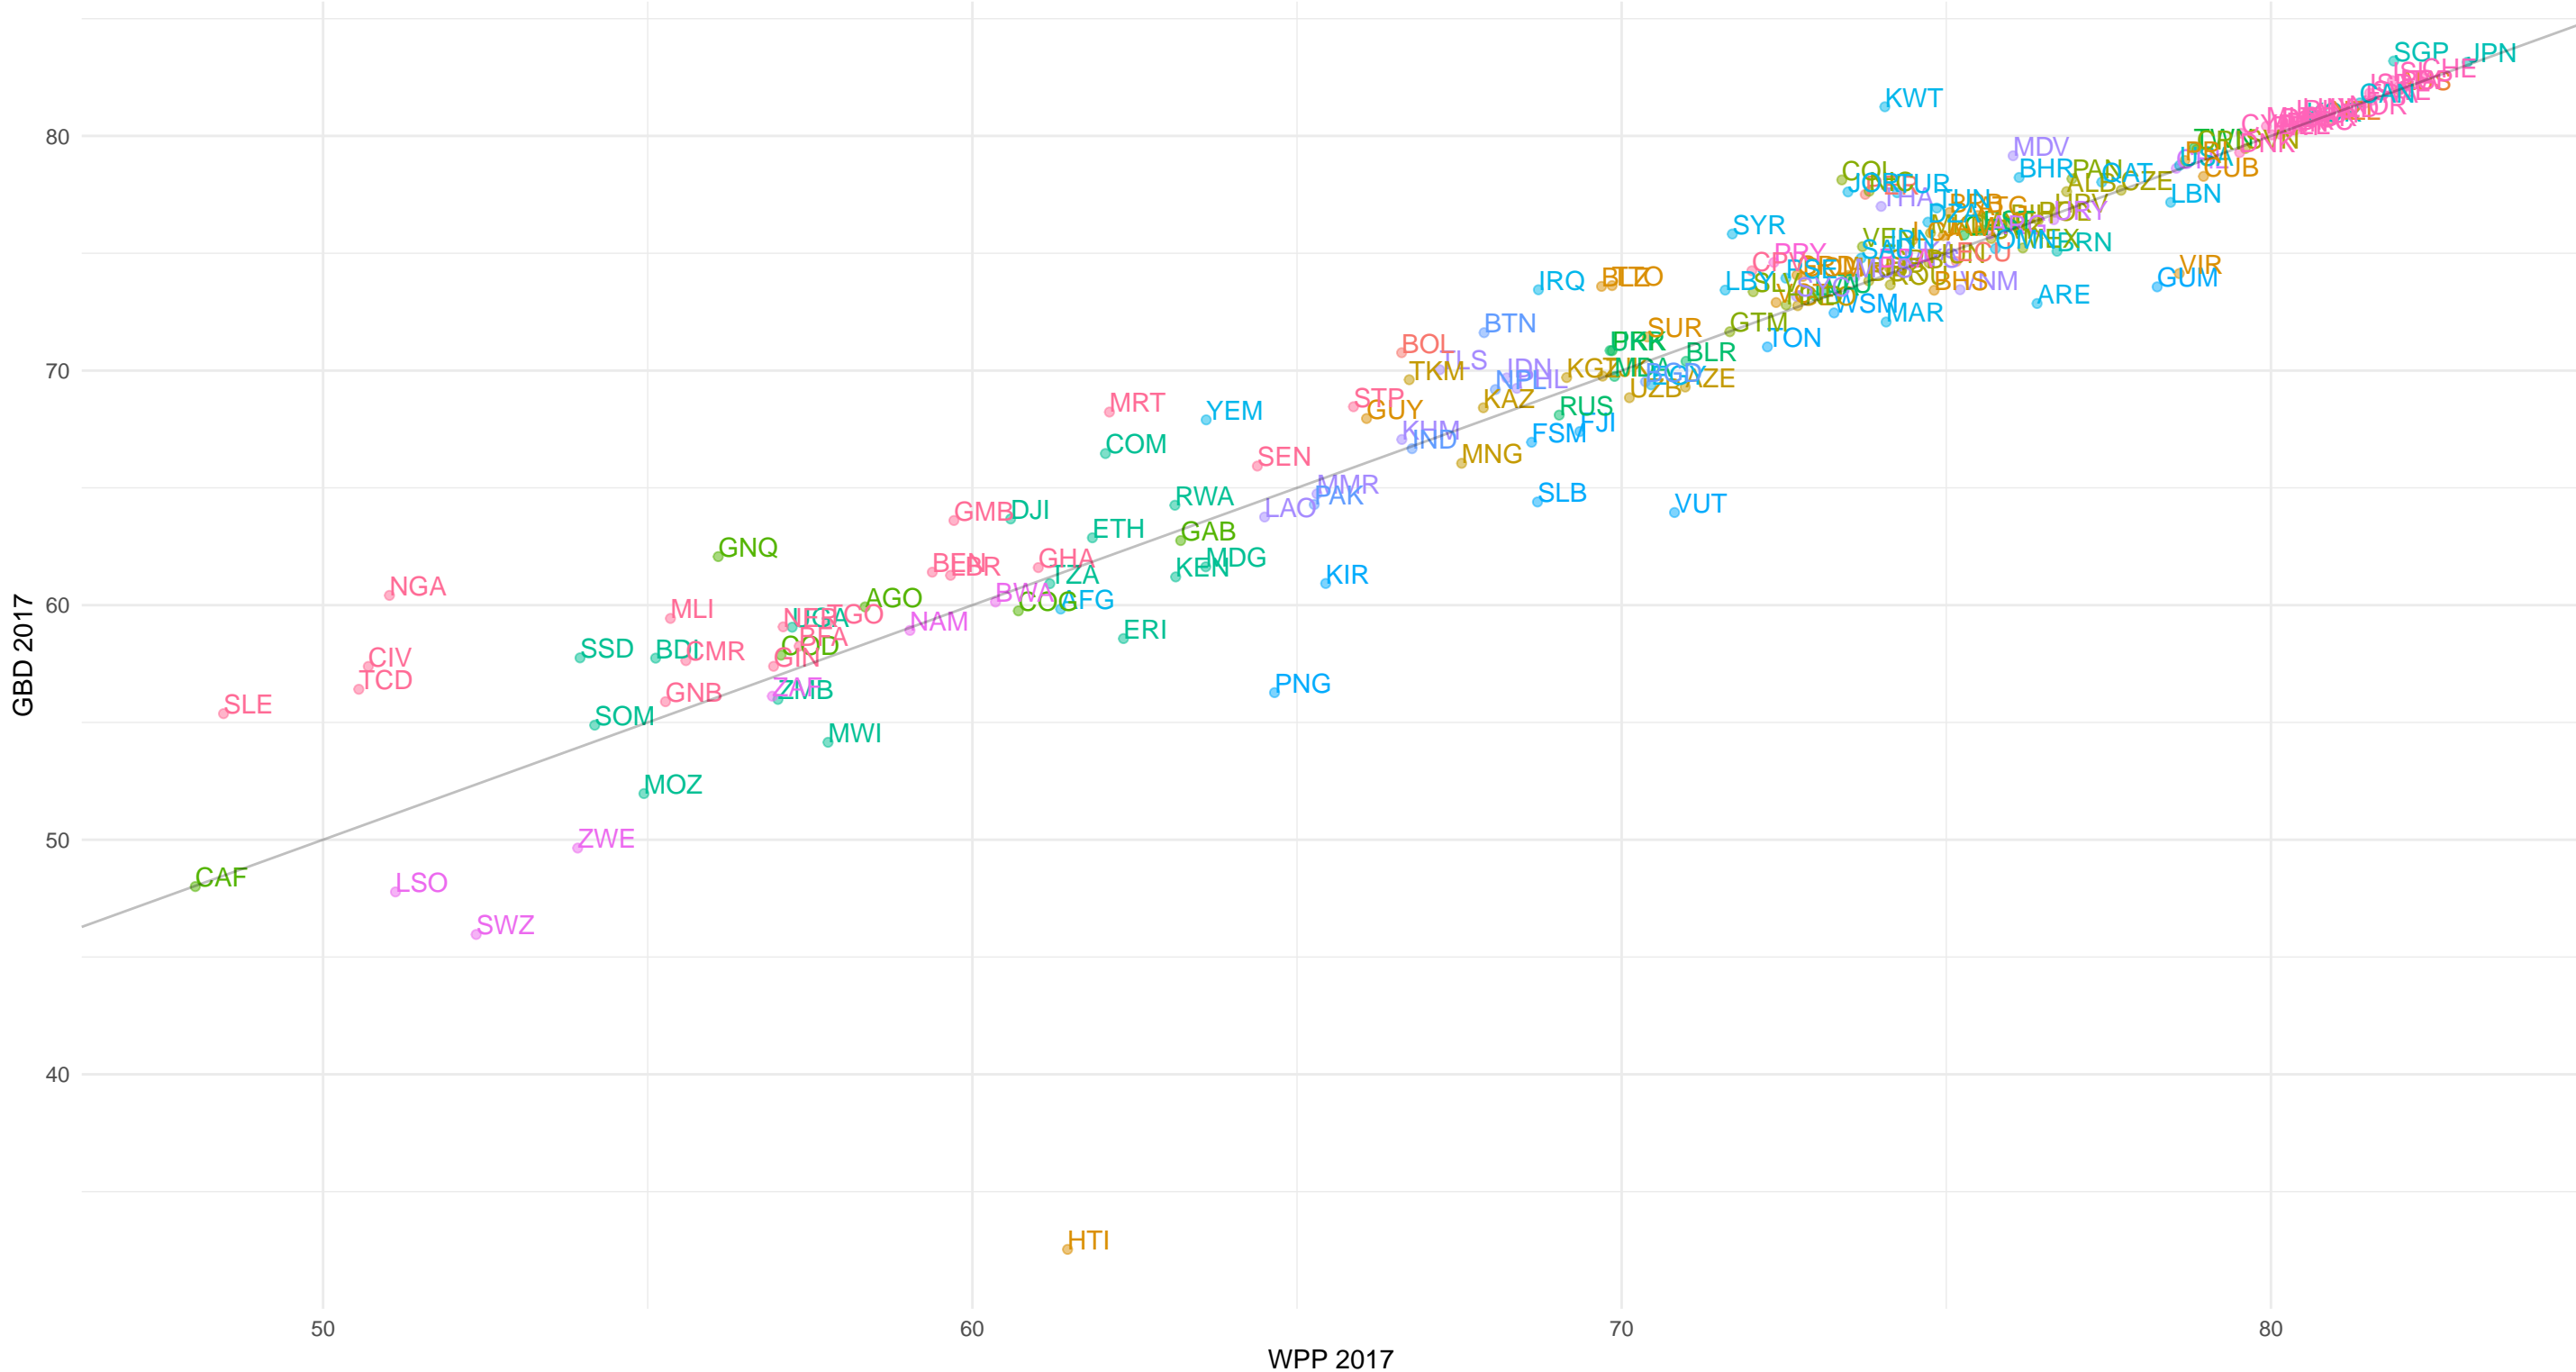

- |                                                             |                                                                   |                                                                     |                                                                    |                                                                   |
|-------------------------------------------------------------|-------------------------------------------------------------------|---------------------------------------------------------------------|--------------------------------------------------------------------|-------------------------------------------------------------------|
| <span style="color: #e31a1c;">a</span> Andean Latin America | <span style="color: #99ac33;">a</span> Central Latin America      | <span style="color: #1f77b4;">a</span> High-income Asia Pacific     | <span style="color: #9467bd;">a</span> Southeast Asia              | <span style="color: #e31a1c;">a</span> Western Sub-Saharan Africa |
| <span style="color: #e31a1c;">a</span> Australasia          | <span style="color: #99ac33;">a</span> Central Sub-Saharan Africa | <span style="color: #1f77b4;">a</span> High-income North America    | <span style="color: #9467bd;">a</span> Southern Latin America      |                                                                   |
| <span style="color: #e31a1c;">a</span> Caribbean            | <span style="color: #99ac33;">a</span> East Asia                  | <span style="color: #1f77b4;">a</span> North Africa and Middle East | <span style="color: #9467bd;">a</span> Southern Sub-Saharan Africa |                                                                   |
| <span style="color: #e31a1c;">a</span> Central Asia         | <span style="color: #99ac33;">a</span> Eastern Europe             | <span style="color: #1f77b4;">a</span> Oceania                      | <span style="color: #9467bd;">a</span> Tropical Latin America      |                                                                   |
| <span style="color: #e31a1c;">a</span> Central Europe       | <span style="color: #99ac33;">a</span> Eastern Sub-Saharan Africa | <span style="color: #1f77b4;">a</span> South Asia                   | <span style="color: #9467bd;">a</span> Western Europe              |                                                                   |

# Comparison of life expectancy at birth for countries in GBD 2017 vs WPP 2017 for 2017, both sexes combined

CCC: 0.92815

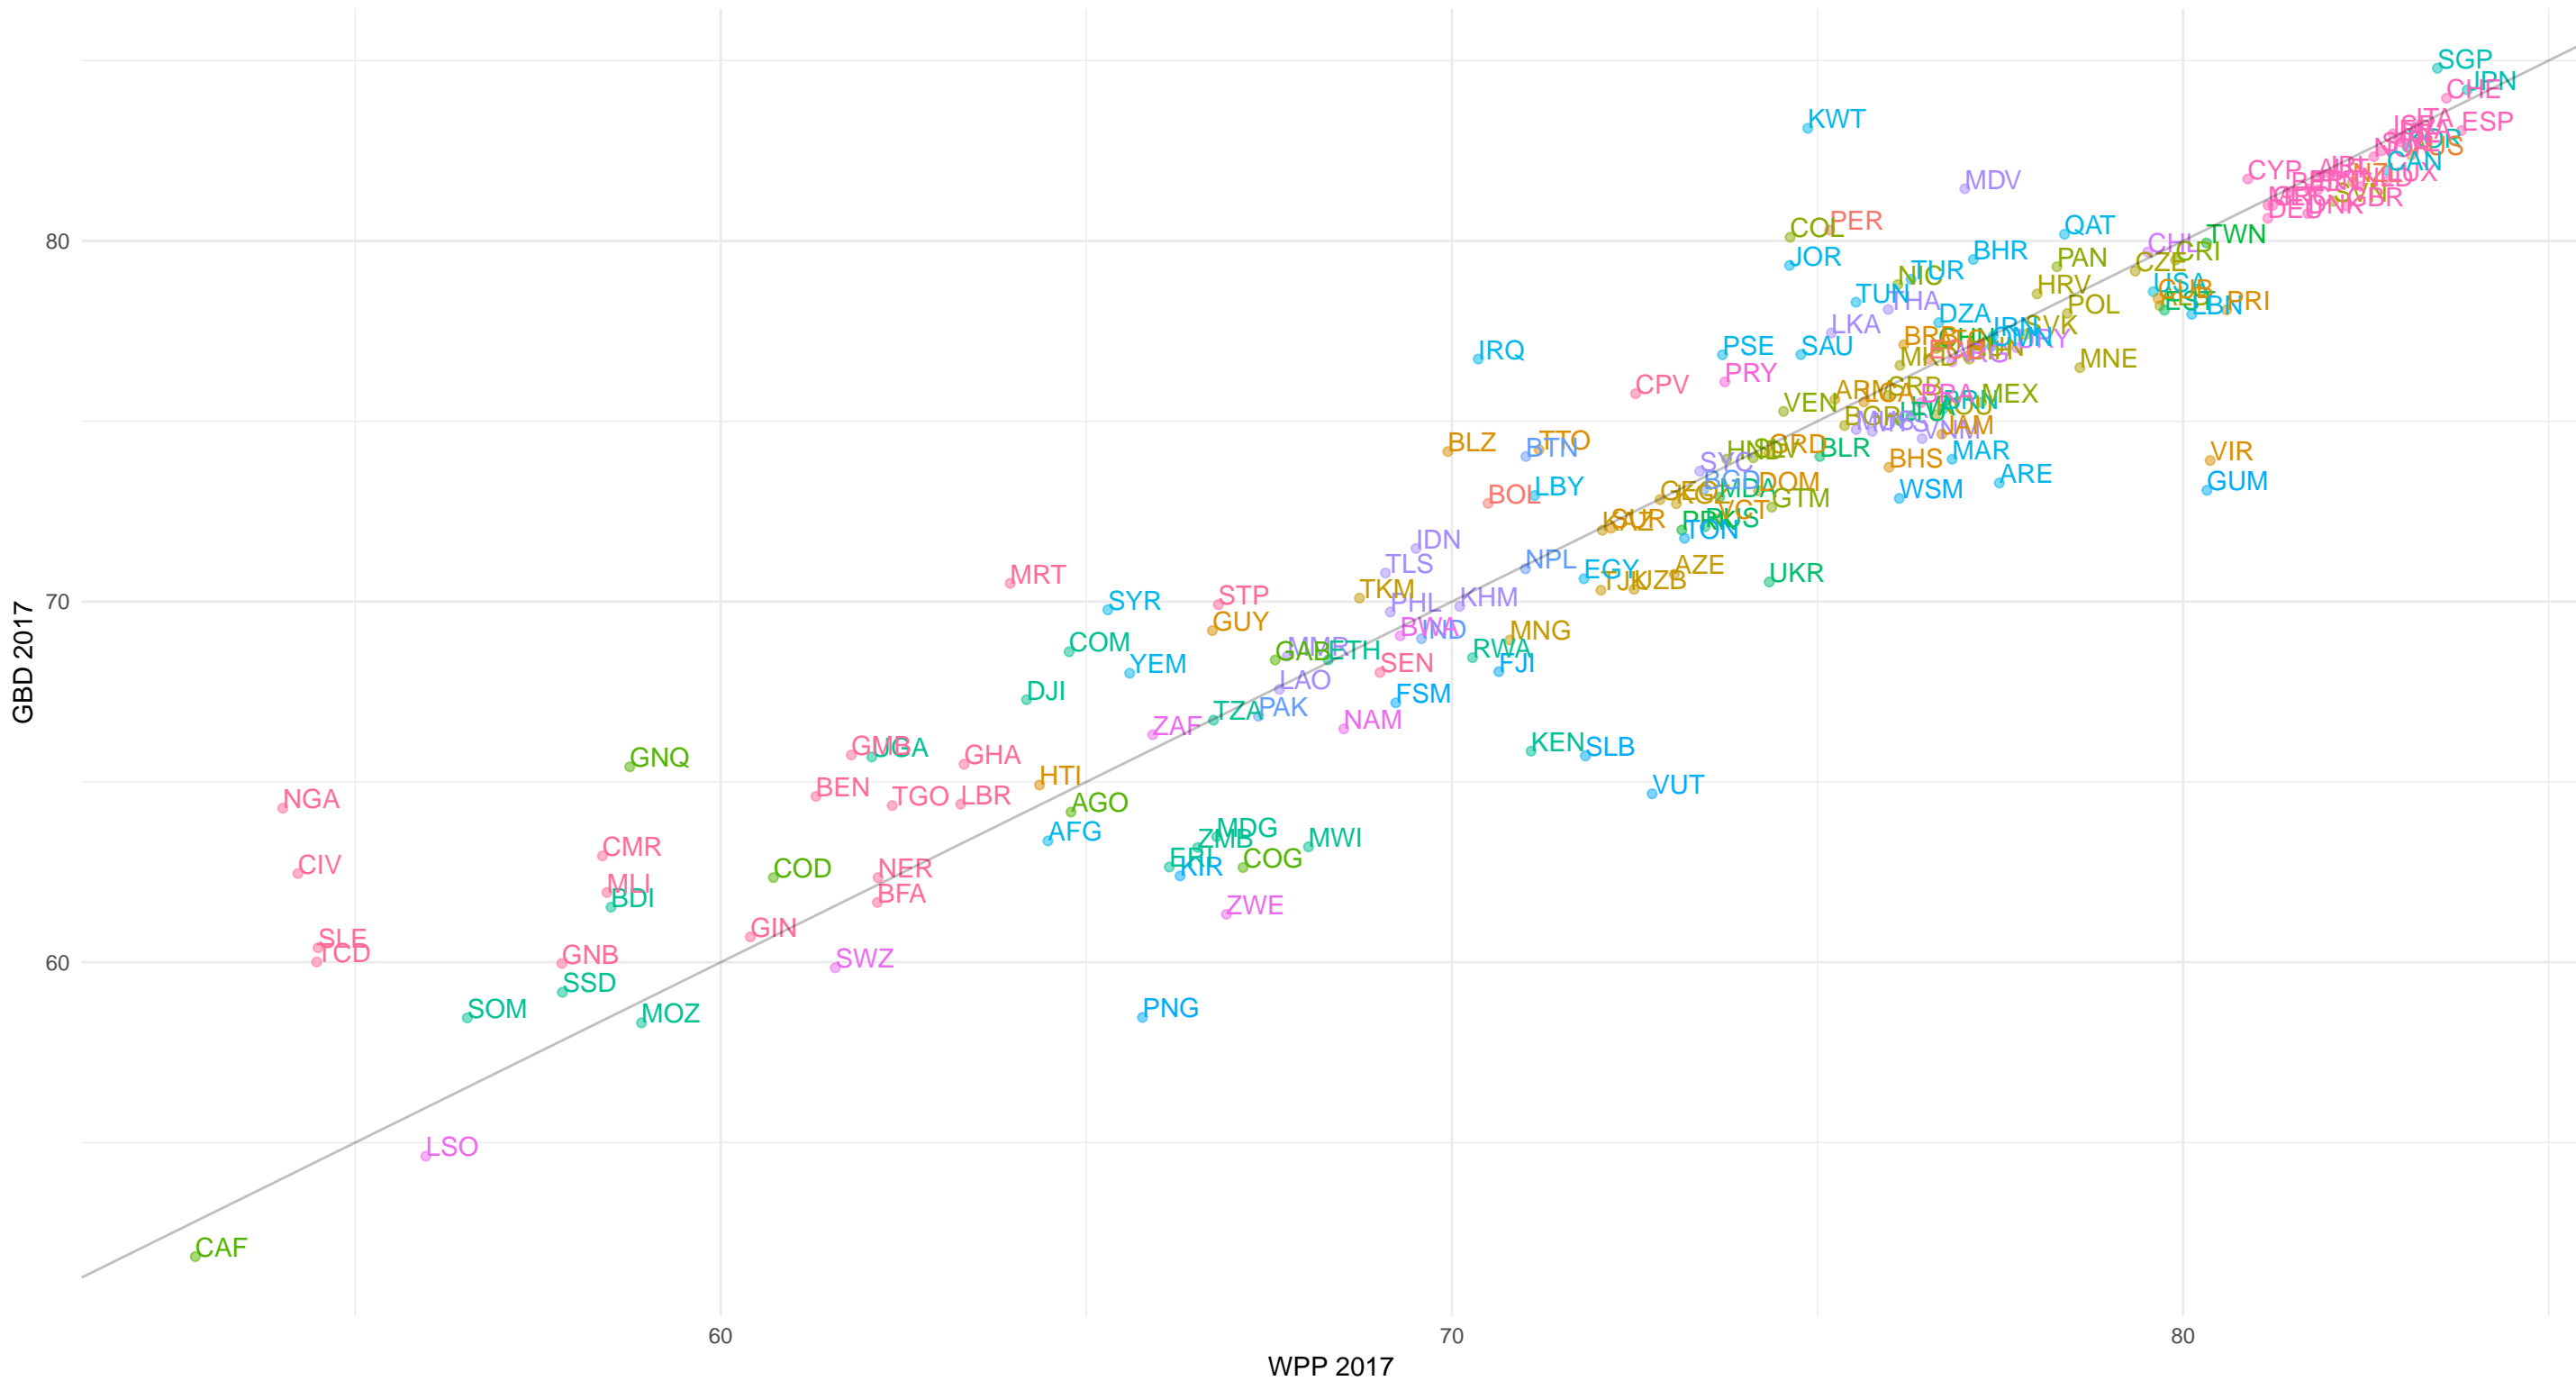

- |                                                             |                                                                   |                                                                     |                                                                    |                                                                   |
|-------------------------------------------------------------|-------------------------------------------------------------------|---------------------------------------------------------------------|--------------------------------------------------------------------|-------------------------------------------------------------------|
| <span style="color: #E377C2;">a</span> Andean Latin America | <span style="color: #2CA02C;">a</span> Central Latin America      | <span style="color: #17BECF;">a</span> High-income Asia Pacific     | <span style="color: #9467BD;">a</span> Southeast Asia              | <span style="color: #E377C2;">a</span> Western Sub-Saharan Africa |
| <span style="color: #FF7F0E;">a</span> Australasia          | <span style="color: #2CA02C;">a</span> Central Sub-Saharan Africa | <span style="color: #17BECF;">a</span> High-income North America    | <span style="color: #9467BD;">a</span> Southern Latin America      |                                                                   |
| <span style="color: #FF7F0E;">a</span> Caribbean            | <span style="color: #2CA02C;">a</span> East Asia                  | <span style="color: #17BECF;">a</span> North Africa and Middle East | <span style="color: #9467BD;">a</span> Southern Sub-Saharan Africa |                                                                   |
| <span style="color: #FF7F0E;">a</span> Central Asia         | <span style="color: #2CA02C;">a</span> Eastern Europe             | <span style="color: #17BECF;">a</span> Oceania                      | <span style="color: #9467BD;">a</span> Tropical Latin America      |                                                                   |
| <span style="color: #FF7F0E;">a</span> Central Europe       | <span style="color: #2CA02C;">a</span> Eastern Sub-Saharan Africa | <span style="color: #17BECF;">a</span> South Asia                   | <span style="color: #9467BD;">a</span> Western Europe              |                                                                   |







Table 1 Age-standardized mortality rates by location and year for males for 1950, 1955-2005, 2010, 2017

| Location             | 1950   | 1955   | 1960   | 1965   | 1970   | 1975   | 1980   | 1985   | 1990   | 1995   | 2000   | 2005   | 2010   | 2017   |
|----------------------|--------|--------|--------|--------|--------|--------|--------|--------|--------|--------|--------|--------|--------|--------|
| UKI London           | 1447.6 | 1262.1 | 1262.1 | 1262.1 | 1179.9 | 1179.9 | 1179.9 | 1179.9 | 1071.1 | 1071.1 | 1071.1 | 1071.1 | 1071.1 | 1071.1 |
| UKI North            | 1378.8 | 1262.1 | 1262.1 | 1262.1 | 1179.9 | 1179.9 | 1179.9 | 1179.9 | 1071.1 | 1071.1 | 1071.1 | 1071.1 | 1071.1 | 1071.1 |
| UKI South            | 1378.8 | 1262.1 | 1262.1 | 1262.1 | 1179.9 | 1179.9 | 1179.9 | 1179.9 | 1071.1 | 1071.1 | 1071.1 | 1071.1 | 1071.1 | 1071.1 |
| UKI East             | 1378.8 | 1262.1 | 1262.1 | 1262.1 | 1179.9 | 1179.9 | 1179.9 | 1179.9 | 1071.1 | 1071.1 | 1071.1 | 1071.1 | 1071.1 | 1071.1 |
| UKI West             | 1378.8 | 1262.1 | 1262.1 | 1262.1 | 1179.9 | 1179.9 | 1179.9 | 1179.9 | 1071.1 | 1071.1 | 1071.1 | 1071.1 | 1071.1 | 1071.1 |
| UKI Midlands         | 1378.8 | 1262.1 | 1262.1 | 1262.1 | 1179.9 | 1179.9 | 1179.9 | 1179.9 | 1071.1 | 1071.1 | 1071.1 | 1071.1 | 1071.1 | 1071.1 |
| UKI Yorkshire        | 1378.8 | 1262.1 | 1262.1 | 1262.1 | 1179.9 | 1179.9 | 1179.9 | 1179.9 | 1071.1 | 1071.1 | 1071.1 | 1071.1 | 1071.1 | 1071.1 |
| UKI Wales            | 1378.8 | 1262.1 | 1262.1 | 1262.1 | 1179.9 | 1179.9 | 1179.9 | 1179.9 | 1071.1 | 1071.1 | 1071.1 | 1071.1 | 1071.1 | 1071.1 |
| UKI Scotland         | 1378.8 | 1262.1 | 1262.1 | 1262.1 | 1179.9 | 1179.9 | 1179.9 | 1179.9 | 1071.1 | 1071.1 | 1071.1 | 1071.1 | 1071.1 | 1071.1 |
| UKI Northern Ireland | 1378.8 | 1262.1 | 1262.1 | 1262.1 | 1179.9 | 1179.9 | 1179.9 | 1179.9 | 1071.1 | 1071.1 | 1071.1 | 1071.1 | 1071.1 | 1071.1 |
| UKI Overseas         | 1378.8 | 1262.1 | 1262.1 | 1262.1 | 1179.9 | 1179.9 | 1179.9 | 1179.9 | 1071.1 | 1071.1 | 1071.1 | 1071.1 | 1071.1 | 1071.1 |
| UKI Total            | 1378.8 | 1262.1 | 1262.1 | 1262.1 | 1179.9 | 1179.9 | 1179.9 | 1179.9 | 1071.1 | 1071.1 | 1071.1 | 1071.1 | 1071.1 | 1071.1 |
| UKI London           | 1447.6 | 1262.1 | 1262.1 | 1262.1 | 1179.9 | 1179.9 | 1179.9 | 1179.9 | 1071.1 | 1071.1 | 1071.1 | 1071.1 | 1071.1 | 1071.1 |
| UKI North            | 1378.8 | 1262.1 | 1262.1 | 1262.1 | 1179.9 | 1179.9 | 1179.9 | 1179.9 | 1071.1 | 1071.1 | 1071.1 | 1071.1 | 1071.1 | 1071.1 |
| UKI South            | 1378.8 | 1262.1 | 1262.1 | 1262.1 | 1179.9 | 1179.9 | 1179.9 | 1179.9 | 1071.1 | 1071.1 | 1071.1 | 1071.1 | 1071.1 | 1071.1 |
| UKI East             | 1378.8 | 1262.1 | 1262.1 | 1262.1 | 1179.9 | 1179.9 | 1179.9 | 1179.9 | 1071.1 | 1071.1 | 1071.1 | 1071.1 | 1071.1 | 1071.1 |
| UKI West             | 1378.8 | 1262.1 | 1262.1 | 1262.1 | 1179.9 | 1179.9 | 1179.9 | 1179.9 | 1071.1 | 1071.1 | 1071.1 | 1071.1 | 1071.1 | 1071.1 |
| UKI Midlands         | 1378.8 | 1262.1 | 1262.1 | 1262.1 | 1179.9 | 1179.9 | 1179.9 | 1179.9 | 1071.1 | 1071.1 | 1071.1 | 1071.1 | 1071.1 | 1071.1 |
| UKI Yorkshire        | 1378.8 | 1262.1 | 1262.1 | 1262.1 | 1179.9 | 1179.9 | 1179.9 | 1179.9 | 1071.1 | 1071.1 | 1071.1 | 1071.1 | 1071.1 | 1071.1 |
| UKI Wales            | 1378.8 | 1262.1 | 1262.1 | 1262.1 | 1179.9 | 1179.9 | 1179.9 | 1179.9 | 1071.1 | 1071.1 | 1071.1 | 1071.1 | 1071.1 | 1071.1 |
| UKI Scotland         | 1378.8 | 1262.1 | 1262.1 | 1262.1 | 1179.9 | 1179.9 | 1179.9 | 1179.9 | 1071.1 | 1071.1 | 1071.1 | 1071.1 | 1071.1 | 1071.1 |
| UKI Northern Ireland | 1378.8 | 1262.1 | 1262.1 | 1262.1 | 1179.9 | 1179.9 | 1179.9 | 1179.9 | 1071.1 | 1071.1 | 1071.1 | 1071.1 | 1071.1 | 1071.1 |
| UKI Overseas         | 1378.8 | 1262.1 | 1262.1 | 1262.1 | 1179.9 | 1179.9 | 1179.9 | 1179.9 | 1071.1 | 1071.1 | 1071.1 | 1071.1 | 1071.1 | 1071.1 |
| UKI Total            | 1378.8 | 1262.1 | 1262.1 | 1262.1 | 1179.9 | 1179.9 | 1179.9 | 1179.9 | 1071.1 | 1071.1 | 1071.1 | 1071.1 | 1071.1 | 1071.1 |

Table 1 Age-standardised mortality rates by location and year for males for 1950, 1955, 2005, 2010, 2017

| Location                      | 1950          | 1955          | 1960          | 1965          | 1970          | 1975          | 1980          | 1985          | 1990          | 1995          | 2000          | 2005          | 2010          | 2017          |
|-------------------------------|---------------|---------------|---------------|---------------|---------------|---------------|---------------|---------------|---------------|---------------|---------------|---------------|---------------|---------------|
| UK Bureton                    | 1363.1        | 1223          | 1223          | 1223          | 1041          | 1118          | 904           | 875           | 918           | 821           | 815           | 803           | 804           | 827           |
| UK Bournemouth                | 1046.4 (1780) | 1046.4 (1780) | 1046.4 (1780) | 1046.4 (1780) | 1046.4 (1780) | 1046.4 (1780) | 1046.4 (1780) | 1046.4 (1780) | 1046.4 (1780) | 1046.4 (1780) | 1046.4 (1780) | 1046.4 (1780) | 1046.4 (1780) | 1046.4 (1780) |
| UK Bristol, City              | 1425          | 1364          | 1348          | 1348          | 1323          | 1271          | 1178          | 1087          | 1071          | 924           | 828           | 732           | 652           | 583           |
| UK Camden                     | 1344.5        | 1312          | 1311          | 1312          | 1302          | 1259          | 1185          | 1094          | 931           | 816           | 743           | 695           | 625           | 578           |
| UK Devon                      | 1307.2        | 1258          | 1263          | 1264          | 1264          | 1166          | 1078          | 978           | 868           | 769           | 681           | 607           | 543           | 497           |
| UK Dorset                     | 1298          | 1229          | 1229          | 1229          | 1089          | 1129          | 949           | 924           | 824           | 724           | 624           | 524           | 424           | 324           |
| UK Gloucestershire            | 1363.3        | 1283          | 1283          | 1283          | 1183          | 1223          | 1043          | 1013          | 913           | 813           | 713           | 613           | 513           | 413           |
| UK North Somerset             | 1308.5        | 1248.5        | 1248.5        | 1248.5        | 1148.5        | 1208.5        | 1028.5        | 1008.5        | 908.5         | 808.5         | 708.5         | 608.5         | 508.5         | 408.5         |
| UK Plymouth                   | 1474.4        | 1408.4        | 1408.4        | 1408.4        | 1308.4        | 1368.4        | 1188.4        | 1168.4        | 1068.4        | 968.4         | 868.4         | 768.4         | 668.4         | 568.4         |
| UK Poole                      | 1360          | 1280          | 1280          | 1280          | 1180          | 1220          | 1040          | 1010          | 910           | 810           | 710           | 610           | 510           | 410           |
| UK Somerset                   | 1363.3        | 1283          | 1283          | 1283          | 1183          | 1223          | 1043          | 1013          | 913           | 813           | 713           | 613           | 513           | 413           |
| UK South Gloucestershire      | 1363.3        | 1283          | 1283          | 1283          | 1183          | 1223          | 1043          | 1013          | 913           | 813           | 713           | 613           | 513           | 413           |
| UK Stroud                     | 1363.3        | 1283          | 1283          | 1283          | 1183          | 1223          | 1043          | 1013          | 913           | 813           | 713           | 613           | 513           | 413           |
| UK Tisbury                    | 1363.3        | 1283          | 1283          | 1283          | 1183          | 1223          | 1043          | 1013          | 913           | 813           | 713           | 613           | 513           | 413           |
| UK Wiltshire                  | 1363.3        | 1283          | 1283          | 1283          | 1183          | 1223          | 1043          | 1013          | 913           | 813           | 713           | 613           | 513           | 413           |
| UK West                       | 1363.3        | 1283          | 1283          | 1283          | 1183          | 1223          | 1043          | 1013          | 913           | 813           | 713           | 613           | 513           | 413           |
| ENGL West Midlands            | 1363.3        | 1283          | 1283          | 1283          | 1183          | 1223          | 1043          | 1013          | 913           | 813           | 713           | 613           | 513           | 413           |
| ENGL West Yorkshire           | 1363.3        | 1283          | 1283          | 1283          | 1183          | 1223          | 1043          | 1013          | 913           | 813           | 713           | 613           | 513           | 413           |
| ENGL Yorkshire and the Humber | 1363.3        | 1283          | 1283          | 1283          | 1183          | 1223          | 1043          | 1013          | 913           | 813           | 713           | 613           | 513           | 413           |
| ENGL East of England          | 1363.3        | 1283          | 1283          | 1283          | 1183          | 1223          | 1043          | 1013          | 913           | 813           | 713           | 613           | 513           | 413           |
| ENGL East London              | 1363.3        | 1283          | 1283          | 1283          | 1183          | 1223          | 1043          | 1013          | 913           | 813           | 713           | 613           | 513           | 413           |
| ENGL South East               | 1363.3        | 1283          | 1283          | 1283          | 1183          | 1223          | 1043          | 1013          | 913           | 813           | 713           | 613           | 513           | 413           |
| ENGL South West               | 1363.3        | 1283          | 1283          | 1283          | 1183          | 1223          | 1043          | 1013          | 913           | 813           | 713           | 613           | 513           | 413           |
| ENGL North East               | 1363.3        | 1283          | 1283          | 1283          | 1183          | 1223          | 1043          | 1013          | 913           | 813           | 713           | 613           | 513           | 413           |
| ENGL North West               | 1363.3        | 1283          | 1283          | 1283          | 1183          | 1223          | 1043          | 1013          | 913           | 813           | 713           | 613           | 513           | 413           |
| ENGL London                   | 1363.3        | 1283          | 1283          | 1283          | 1183          | 1223          | 1043          | 1013          | 913           | 813           | 713           | 613           | 513           | 413           |
| ENGL London, Greater          | 1363.3        | 1283          | 1283          | 1283          | 1183          | 1223          | 1043          | 1013          | 913           | 813           | 713           | 613           | 513           | 413           |
| ENGL London, Outer            | 1363.3        | 1283          | 1283          | 1283          | 1183          | 1223          | 1043          | 1013          | 913           | 813           | 713           | 613           | 513           | 413           |
| ENGL London, Inner            | 1363.3        | 1283          | 1283          | 1283          | 1183          | 1223          | 1043          | 1013          | 913           | 813           | 713           | 613           | 513           | 413           |
| ENGL London, London           | 1363.3        | 1283          | 1283          | 1283          | 1183          | 1223          | 1043          | 1013          | 913           | 813           | 713           | 613           | 513           | 413           |
| ENGL London, City             | 1363.3        | 1283          | 1283          | 1283          | 1183          | 1223          | 1043          | 1013          | 913           | 813           | 713           | 613           | 513           | 413           |
| ENGL London, London           | 1363.3        | 1283          | 1283          | 1283          | 1183          | 1223          | 1043          | 1013          | 913           | 813           | 713           | 613           | 513           | 413           |
| ENGL London, London           | 1363.3        | 1283          | 1283          | 1283          | 1183          | 1223          | 1043          | 1013          | 913           | 813           | 713           | 613           | 513           | 413           |





Table 1 Age-standardised mortality rates by location and year for males for 1950, 1955, 2005, 2010, 2017

| Location                    | 1950  | 1955  | 1960  | 1965  | 1970  | 1975 | 1980 | 1985 | 1990 | 1995 | 2000 | 2005 | 2010 | 2017 |
|-----------------------------|-------|-------|-------|-------|-------|------|------|------|------|------|------|------|------|------|
| KEN Turkana                 | 17335 | 14887 | 13062 | 11929 | 10623 | 9355 | 8248 | 7403 | 6683 | 6065 | 5542 | 5109 | 4764 | 4504 |
| KEN Loini Gishu             | 15627 | 13232 | 11574 | 10374 | 9211  | 8142 | 7247 | 6504 | 5904 | 5404 | 4984 | 4644 | 4364 | 4164 |
| KEN Vihiga                  | 15127 | 12869 | 11211 | 10011 | 8848  | 7789 | 6944 | 6244 | 5684 | 5204 | 4804 | 4484 | 4224 | 4024 |
| KEN Wajir                   | 14881 | 12623 | 11065 | 9865  | 8702  | 7643 | 6704 | 5964 | 5404 | 5004 | 4604 | 4304 | 4044 | 3844 |
| KEN West Pokot              | 14044 | 11886 | 10328 | 9128  | 8069  | 7130 | 6304 | 5564 | 4904 | 4504 | 4104 | 3804 | 3544 | 3344 |
| MDK Madagapur               | 2096  | 1870  | 1644  | 1418  | 1202  | 1002 | 826  | 674  | 542  | 430  | 338  | 256  | 184  | 122  |
| MWI Malawi                  | 14174 | 12016 | 10458 | 9258  | 8199  | 7260 | 6434 | 5714 | 5104 | 4594 | 4184 | 3874 | 3564 | 3254 |
| MZQ Mozambique              | 3282  | 2816  | 2450  | 2184  | 1918  | 1652 | 1386 | 1120 | 854  | 588  | 322  | 156  | 70   | 34   |
| RWA Rwanda                  | 2386  | 2020  | 1754  | 1588  | 1422  | 1256 | 1090 | 924  | 758  | 592  | 426  | 260  | 94   | 28   |
| SOM Somalia                 | 2022  | 1756  | 1590  | 1424  | 1258  | 1092 | 926  | 760  | 594  | 428  | 262  | 96   | 30   | 14   |
| SSD South Sudan             | 2484  | 2118  | 1852  | 1686  | 1520  | 1354 | 1188 | 1022 | 856  | 690  | 524  | 358  | 192  | 86   |
| TZA Tanga                   | 2064  | 1898  | 1732  | 1566  | 1400  | 1234 | 1068 | 902  | 736  | 570  | 404  | 238  | 72   | 26   |
| UGA Uganda                  | 3019  | 2653  | 2287  | 1921  | 1555  | 1189 | 823  | 457  | 291  | 125  | 59   | 23   | 7    | 1    |
| ZMB Zambia                  | 2042  | 1876  | 1710  | 1544  | 1378  | 1212 | 1046 | 880  | 714  | 548  | 382  | 216  | 50   | 14   |
| Southern sub-Saharan Africa | 2719  | 2353  | 2087  | 1821  | 1555  | 1289 | 1023 | 757  | 491  | 225  | 69   | 13   | 4    | 0    |
| BWA Botswana                | 2726  | 2360  | 2094  | 1828  | 1562  | 1296 | 1030 | 764  | 498  | 232  | 66   | 10   | 3    | 0    |
| LSD Lesotho                 | 2726  | 2360  | 2094  | 1828  | 1562  | 1296 | 1030 | 764  | 498  | 232  | 66   | 10   | 3    | 0    |
| NAM Namibia                 | 2726  | 2360  | 2094  | 1828  | 1562  | 1296 | 1030 | 764  | 498  | 232  | 66   | 10   | 3    | 0    |
| SWZ Swaziland               | 2726  | 2360  | 2094  | 1828  | 1562  | 1296 | 1030 | 764  | 498  | 232  | 66   | 10   | 3    | 0    |
| ZWE Zimbabwe                | 2726  | 2360  | 2094  | 1828  | 1562  | 1296 | 1030 | 764  | 498  | 232  | 66   | 10   | 3    | 0    |
| Western sub-Saharan Africa  | 2726  | 2360  | 2094  | 1828  | 1562  | 1296 | 1030 | 764  | 498  | 232  | 66   | 10   | 3    | 0    |
| BEA Benin                   | 3019  | 2653  | 2287  | 1921  | 1555  | 1189 | 823  | 457  | 291  | 125  | 59   | 23   | 7    | 1    |
| BFA Burkina Faso            | 3019  | 2653  | 2287  | 1921  | 1555  | 1189 | 823  | 457  | 291  | 125  | 59   | 23   | 7    | 1    |
| CMR Cameroon                | 3019  | 2653  | 2287  | 1921  | 1555  | 1189 | 823  | 457  | 291  | 125  | 59   | 23   | 7    | 1    |
| CIV Cote d'Ivoire           | 3019  | 2653  | 2287  | 1921  | 1555  | 1189 | 823  | 457  | 291  | 125  | 59   | 23   | 7    | 1    |
| ETH Ethiopia                | 3019  | 2653  | 2287  | 1921  | 1555  | 1189 | 823  | 457  | 291  | 125  | 59   | 23   | 7    | 1    |
| GHA Ghana                   | 3019  | 2653  | 2287  | 1921  | 1555  | 1189 | 823  | 457  | 291  | 125  | 59   | 23   | 7    | 1    |
| GIN Guinea                  | 3019  | 2653  | 2287  | 1921  | 1555  | 1189 | 823  | 457  | 291  | 125  | 59   | 23   | 7    | 1    |
| GNB Guinea-Bissau           | 3019  | 2653  | 2287  | 1921  | 1555  | 1189 | 823  | 457  | 291  | 125  | 59   | 23   | 7    | 1    |
| LRB Liberia                 | 3019  | 2653  | 2287  | 1921  | 1555  | 1189 | 823  | 457  | 291  | 125  | 59   | 23   | 7    | 1    |
| MLI Mali                    | 3019  | 2653  | 2287  | 1921  | 1555  | 1189 | 823  | 457  | 291  | 125  | 59   | 23   | 7    | 1    |
| MRT Mauritania              | 3019  | 2653  | 2287  | 1921  | 1555  | 1189 | 823  | 457  | 291  | 125  | 59   | 23   | 7    | 1    |
| NER Niger                   | 3019  | 2653  | 2287  | 1921  | 1555  | 1189 | 823  | 457  | 291  | 125  | 59   | 23   | 7    | 1    |
| NIG Nigeria                 | 3019  | 2653  | 2287  | 1921  | 1555  | 1189 | 823  | 457  | 291  | 125  | 59   | 23   | 7    | 1    |
| STP Sao Tome and Principe   | 3019  | 2653  | 2287  | 1921  | 1555  | 1189 | 823  | 457  | 291  | 125  | 59   | 23   | 7    | 1    |
| SEN Senegal                 | 3019  | 2653  | 2287  | 1921  | 1555  | 1189 | 823  | 457  | 291  | 125  | 59   | 23   | 7    | 1    |
| SE Simbabwe                 | 3019  | 2653  | 2287  | 1921  | 1555  | 1189 | 823  | 457  | 291  | 125  | 59   | 23   | 7    | 1    |
| TGO Togo                    | 3019  | 2653  | 2287  | 1921  | 1555  | 1189 | 823  | 457  | 291  | 125  | 59   | 23   | 7    | 1    |















Table 1 Age-standardised mortality rates by location and year for both sexes for 1950, 1955, 1960, 1965, 1970, 1975, 1980, 1985, 1990, 1995, 2000, 2005, 2010, 2017

| Location                    | 1950   | 1955   | 1960   | 1965   | 1970   | 1975   | 1980   | 1985   | 1990   | 1995   | 2000   | 2005   | 2010   | 2017   |
|-----------------------------|--------|--------|--------|--------|--------|--------|--------|--------|--------|--------|--------|--------|--------|--------|
| KEN Turkana                 | 1396.4 | 1047.2 | 1519.9 | 1734.8 | 1713.8 | 1526.6 | 1470.9 | 1470.9 | 1470.9 | 1470.9 | 1470.9 | 1470.9 | 1470.9 | 1470.9 |
| KEN Union Ghub              | 1591.3 | 1074.2 | 1454.3 | 1591.8 | 1530.9 | 1362.9 | 1242.9 | 1202.9 | 1224.4 | 1317.3 | 1418.5 | 1418.5 | 1418.5 | 1418.5 |
| KEN Vihiga                  | 1862.9 | 1184.2 | 1464.4 | 1587.8 | 1530.9 | 1362.9 | 1242.9 | 1202.9 | 1224.4 | 1317.3 | 1418.5 | 1418.5 | 1418.5 | 1418.5 |
| KEN Wajir                   | 1862.9 | 1184.2 | 1464.4 | 1587.8 | 1530.9 | 1362.9 | 1242.9 | 1202.9 | 1224.4 | 1317.3 | 1418.5 | 1418.5 | 1418.5 | 1418.5 |
| KEN West Pokot              | 1862.9 | 1184.2 | 1464.4 | 1587.8 | 1530.9 | 1362.9 | 1242.9 | 1202.9 | 1224.4 | 1317.3 | 1418.5 | 1418.5 | 1418.5 | 1418.5 |
| MDK Madagascar              | 2084.2 | 1099.6 | 1399.6 | 1579.9 | 1566.7 | 1404.4 | 1279.9 | 1204.4 | 1204.4 | 1204.4 | 1204.4 | 1204.4 | 1204.4 | 1204.4 |
| MWI Malawi                  | 2084.2 | 1099.6 | 1399.6 | 1579.9 | 1566.7 | 1404.4 | 1279.9 | 1204.4 | 1204.4 | 1204.4 | 1204.4 | 1204.4 | 1204.4 | 1204.4 |
| MZQ Mozambique              | 2084.2 | 1099.6 | 1399.6 | 1579.9 | 1566.7 | 1404.4 | 1279.9 | 1204.4 | 1204.4 | 1204.4 | 1204.4 | 1204.4 | 1204.4 | 1204.4 |
| RWA Rwanda                  | 2084.2 | 1099.6 | 1399.6 | 1579.9 | 1566.7 | 1404.4 | 1279.9 | 1204.4 | 1204.4 | 1204.4 | 1204.4 | 1204.4 | 1204.4 | 1204.4 |
| SOM Somalia                 | 2084.2 | 1099.6 | 1399.6 | 1579.9 | 1566.7 | 1404.4 | 1279.9 | 1204.4 | 1204.4 | 1204.4 | 1204.4 | 1204.4 | 1204.4 | 1204.4 |
| SSD South Sudan             | 2084.2 | 1099.6 | 1399.6 | 1579.9 | 1566.7 | 1404.4 | 1279.9 | 1204.4 | 1204.4 | 1204.4 | 1204.4 | 1204.4 | 1204.4 | 1204.4 |
| TZA Tanzania                | 2084.2 | 1099.6 | 1399.6 | 1579.9 | 1566.7 | 1404.4 | 1279.9 | 1204.4 | 1204.4 | 1204.4 | 1204.4 | 1204.4 | 1204.4 | 1204.4 |
| UGA Uganda                  | 2084.2 | 1099.6 | 1399.6 | 1579.9 | 1566.7 | 1404.4 | 1279.9 | 1204.4 | 1204.4 | 1204.4 | 1204.4 | 1204.4 | 1204.4 | 1204.4 |
| ZMB Zambia                  | 2084.2 | 1099.6 | 1399.6 | 1579.9 | 1566.7 | 1404.4 | 1279.9 | 1204.4 | 1204.4 | 1204.4 | 1204.4 | 1204.4 | 1204.4 | 1204.4 |
| Southern sub-Saharan Africa | 2084.2 | 1099.6 | 1399.6 | 1579.9 | 1566.7 | 1404.4 | 1279.9 | 1204.4 | 1204.4 | 1204.4 | 1204.4 | 1204.4 | 1204.4 | 1204.4 |
| BWA Botswana                | 2084.2 | 1099.6 | 1399.6 | 1579.9 | 1566.7 | 1404.4 | 1279.9 | 1204.4 | 1204.4 | 1204.4 | 1204.4 | 1204.4 | 1204.4 | 1204.4 |
| LSO Lesotho                 | 2084.2 | 1099.6 | 1399.6 | 1579.9 | 1566.7 | 1404.4 | 1279.9 | 1204.4 | 1204.4 | 1204.4 | 1204.4 | 1204.4 | 1204.4 | 1204.4 |
| NAM Namibia                 | 2084.2 | 1099.6 | 1399.6 | 1579.9 | 1566.7 | 1404.4 | 1279.9 | 1204.4 | 1204.4 | 1204.4 | 1204.4 | 1204.4 | 1204.4 | 1204.4 |
| ZAF South Africa            | 2084.2 | 1099.6 | 1399.6 | 1579.9 | 1566.7 | 1404.4 | 1279.9 | 1204.4 | 1204.4 | 1204.4 | 1204.4 | 1204.4 | 1204.4 | 1204.4 |
| SWZ Swaziland               | 2084.2 | 1099.6 | 1399.6 | 1579.9 | 1566.7 | 1404.4 | 1279.9 | 1204.4 | 1204.4 | 1204.4 | 1204.4 | 1204.4 | 1204.4 | 1204.4 |
| ZWE Zimbabwe                | 2084.2 | 1099.6 | 1399.6 | 1579.9 | 1566.7 | 1404.4 | 1279.9 | 1204.4 | 1204.4 | 1204.4 | 1204.4 | 1204.4 | 1204.4 | 1204.4 |
| Western sub-Saharan Africa  | 2084.2 | 1099.6 | 1399.6 | 1579.9 | 1566.7 | 1404.4 | 1279.9 | 1204.4 | 1204.4 | 1204.4 | 1204.4 | 1204.4 | 1204.4 | 1204.4 |
| BEA Benin                   | 2084.2 | 1099.6 | 1399.6 | 1579.9 | 1566.7 | 1404.4 | 1279.9 | 1204.4 | 1204.4 | 1204.4 | 1204.4 | 1204.4 | 1204.4 | 1204.4 |
| BFA Burkina Faso            | 2084.2 | 1099.6 | 1399.6 | 1579.9 | 1566.7 | 1404.4 | 1279.9 | 1204.4 | 1204.4 | 1204.4 | 1204.4 | 1204.4 | 1204.4 | 1204.4 |
| CMR Cameroon                | 2084.2 | 1099.6 | 1399.6 | 1579.9 | 1566.7 | 1404.4 | 1279.9 | 1204.4 | 1204.4 | 1204.4 | 1204.4 | 1204.4 | 1204.4 | 1204.4 |
| CIV Cote d'Ivoire           | 2084.2 | 1099.6 | 1399.6 | 1579.9 | 1566.7 | 1404.4 | 1279.9 | 1204.4 | 1204.4 | 1204.4 | 1204.4 | 1204.4 | 1204.4 | 1204.4 |
| GNB Guinea Bissau           | 2084.2 | 1099.6 | 1399.6 | 1579.9 | 1566.7 | 1404.4 | 1279.9 | 1204.4 | 1204.4 | 1204.4 | 1204.4 | 1204.4 | 1204.4 | 1204.4 |
| GNB Guinea                  | 2084.2 | 1099.6 | 1399.6 | 1579.9 | 1566.7 | 1404.4 | 1279.9 | 1204.4 | 1204.4 | 1204.4 | 1204.4 | 1204.4 | 1204.4 | 1204.4 |
| GHA Ghana                   | 2084.2 | 1099.6 | 1399.6 | 1579.9 | 1566.7 | 1404.4 | 1279.9 | 1204.4 | 1204.4 | 1204.4 | 1204.4 | 1204.4 | 1204.4 | 1204.4 |
| GIN Gambia                  | 2084.2 | 1099.6 | 1399.6 | 1579.9 | 1566.7 | 1404.4 | 1279.9 | 1204.4 | 1204.4 | 1204.4 | 1204.4 | 1204.4 | 1204.4 | 1204.4 |
| GNB Guinea Bissau           | 2084.2 | 1099.6 | 1399.6 | 1579.9 | 1566.7 | 1404.4 | 1279.9 | 1204.4 | 1204.4 | 1204.4 | 1204.4 | 1204.4 | 1204.4 | 1204.4 |
| LRB Liberia                 | 2084.2 | 1099.6 | 1399.6 | 1579.9 | 1566.7 | 1404.4 | 1279.9 | 1204.4 | 1204.4 | 1204.4 | 1204.4 | 1204.4 | 1204.4 | 1204.4 |
| MWI Malawi                  | 2084.2 | 1099.6 | 1399.6 | 1579.9 | 1566.7 | 1404.4 | 1279.9 | 1204.4 | 1204.4 | 1204.4 | 1204.4 | 1204.4 | 1204.4 | 1204.4 |
| MRT Mauritius               | 2084.2 | 1099.6 | 1399.6 | 1579.9 | 1566.7 | 1404.4 | 1279.9 | 1204.4 | 1204.4 | 1204.4 | 1204.4 | 1204.4 | 1204.4 | 1204.4 |
| NER Niger                   | 2084.2 | 1099.6 | 1399.6 | 1579.9 | 1566.7 | 1404.4 | 1279.9 | 1204.4 | 1204.4 | 1204.4 | 1204.4 | 1204.4 | 1204.4 | 1204.4 |
| NGA Nigeria                 | 2084.2 | 1099.6 | 1399.6 | 1579.9 | 1566.7 | 1404.4 | 1279.9 | 1204.4 | 1204.4 | 1204.4 | 1204.4 | 1204.4 | 1204.4 | 1204.4 |
| STP Sao Tome and Principe   | 2084.2 | 1099.6 | 1399.6 | 1579.9 | 1566.7 | 1404.4 | 1279.9 | 1204.4 | 1204.4 | 1204.4 | 1204.4 | 1204.4 | 1204.4 | 1204.4 |
| SEN Senegal                 | 2084.2 | 1099.6 | 1399.6 | 1579.9 | 1566.7 | 1404.4 | 1279.9 | 1204.4 | 1204.4 | 1204.4 | 1204.4 | 1204.4 | 1204.4 | 1204.4 |
| SEI Sierra Leone            | 2084.2 | 1099.6 | 1399.6 | 1579.9 | 1566.7 | 1404.4 | 1279.9 | 1204.4 | 1204.4 | 1204.4 | 1204.4 | 1204.4 | 1204.4 | 1204.4 |
| TGO Togo                    | 2084.2 | 1099.6 | 1399.6 | 1579.9 | 1566.7 | 1404.4 | 1279.9 | 1204.4 | 1204.4 | 1204.4 | 1204.4 | 1204.4 | 1204.4 | 1204.4 |







Table 1 Age-standardized mortality rates by location and year for females for 1950, 1955, 2005, 2010, 2017

Table with 15 columns (Location, 1950, 1955, 1960, 1965, 1970, 1975, 1980, 1985, 1990, 1995, 2000, 2005, 2010, 2017). Rows list various countries and regions such as UK, USA, France, Germany, etc., with corresponding mortality rates for each year.







Table 1 Age-standardised mortality rates by location and year for females for 1950, 1955, 2005, 2010, 2017

| Location                    | 1950   | 1955   | 1960   | 1965   | 1970   | 1975   | 1980   | 1985   | 1990   | 1995   | 2000   | 2005   | 2010   | 2017   |
|-----------------------------|--------|--------|--------|--------|--------|--------|--------|--------|--------|--------|--------|--------|--------|--------|
| KEN Turkana                 | 1381.2 | 1216.1 | 1204.4 | 1371.2 | 1371.2 | 1474.6 | 1551.5 | 1500.2 | 1500.2 | 1526.7 | 1526.7 | 1782.2 | 1826.3 | 1826.3 |
| KEN Union Ghub              | 1581.8 | 1381.2 | 1381.2 | 1581.8 | 1581.8 | 1781.2 | 1826.3 | 1826.3 | 1826.3 | 1826.3 | 1826.3 | 1826.3 | 1826.3 | 1826.3 |
| KEN Vihiga                  | 1182.6 | 1182.6 | 1182.6 | 1182.6 | 1182.6 | 1182.6 | 1182.6 | 1182.6 | 1182.6 | 1182.6 | 1182.6 | 1182.6 | 1182.6 | 1182.6 |
| KEN Wajir                   | 1921.1 | 1921.1 | 1921.1 | 1921.1 | 1921.1 | 1921.1 | 1921.1 | 1921.1 | 1921.1 | 1921.1 | 1921.1 | 1921.1 | 1921.1 | 1921.1 |
| KEN West Pokot              | 1996.5 | 1996.5 | 1996.5 | 1996.5 | 1996.5 | 1996.5 | 1996.5 | 1996.5 | 1996.5 | 1996.5 | 1996.5 | 1996.5 | 1996.5 | 1996.5 |
| MDG Madagascar              | 1071.7 | 1071.7 | 1071.7 | 1071.7 | 1071.7 | 1071.7 | 1071.7 | 1071.7 | 1071.7 | 1071.7 | 1071.7 | 1071.7 | 1071.7 | 1071.7 |
| MWI Malawi                  | 2071.3 | 2071.3 | 2071.3 | 2071.3 | 2071.3 | 2071.3 | 2071.3 | 2071.3 | 2071.3 | 2071.3 | 2071.3 | 2071.3 | 2071.3 | 2071.3 |
| MZM Mozambique              | 2071.3 | 2071.3 | 2071.3 | 2071.3 | 2071.3 | 2071.3 | 2071.3 | 2071.3 | 2071.3 | 2071.3 | 2071.3 | 2071.3 | 2071.3 | 2071.3 |
| RWA Rwanda                  | 2071.3 | 2071.3 | 2071.3 | 2071.3 | 2071.3 | 2071.3 | 2071.3 | 2071.3 | 2071.3 | 2071.3 | 2071.3 | 2071.3 | 2071.3 | 2071.3 |
| SOM Somalia                 | 2071.3 | 2071.3 | 2071.3 | 2071.3 | 2071.3 | 2071.3 | 2071.3 | 2071.3 | 2071.3 | 2071.3 | 2071.3 | 2071.3 | 2071.3 | 2071.3 |
| SSD South Sudan             | 2071.3 | 2071.3 | 2071.3 | 2071.3 | 2071.3 | 2071.3 | 2071.3 | 2071.3 | 2071.3 | 2071.3 | 2071.3 | 2071.3 | 2071.3 | 2071.3 |
| TZA Tanzania                | 2071.3 | 2071.3 | 2071.3 | 2071.3 | 2071.3 | 2071.3 | 2071.3 | 2071.3 | 2071.3 | 2071.3 | 2071.3 | 2071.3 | 2071.3 | 2071.3 |
| UGA Uganda                  | 2071.3 | 2071.3 | 2071.3 | 2071.3 | 2071.3 | 2071.3 | 2071.3 | 2071.3 | 2071.3 | 2071.3 | 2071.3 | 2071.3 | 2071.3 | 2071.3 |
| ZMB Zambia                  | 2071.3 | 2071.3 | 2071.3 | 2071.3 | 2071.3 | 2071.3 | 2071.3 | 2071.3 | 2071.3 | 2071.3 | 2071.3 | 2071.3 | 2071.3 | 2071.3 |
| Southern sub-Saharan Africa | 2071.3 | 2071.3 | 2071.3 | 2071.3 | 2071.3 | 2071.3 | 2071.3 | 2071.3 | 2071.3 | 2071.3 | 2071.3 | 2071.3 | 2071.3 | 2071.3 |
| BWA Botswana                | 2071.3 | 2071.3 | 2071.3 | 2071.3 | 2071.3 | 2071.3 | 2071.3 | 2071.3 | 2071.3 | 2071.3 | 2071.3 | 2071.3 | 2071.3 | 2071.3 |
| LSD Lesotho                 | 2071.3 | 2071.3 | 2071.3 | 2071.3 | 2071.3 | 2071.3 | 2071.3 | 2071.3 | 2071.3 | 2071.3 | 2071.3 | 2071.3 | 2071.3 | 2071.3 |
| NAM Namibia                 | 2071.3 | 2071.3 | 2071.3 | 2071.3 | 2071.3 | 2071.3 | 2071.3 | 2071.3 | 2071.3 | 2071.3 | 2071.3 | 2071.3 | 2071.3 | 2071.3 |
| ZAF South Africa            | 2071.3 | 2071.3 | 2071.3 | 2071.3 | 2071.3 | 2071.3 | 2071.3 | 2071.3 | 2071.3 | 2071.3 | 2071.3 | 2071.3 | 2071.3 | 2071.3 |
| SWZ Swaziland               | 2071.3 | 2071.3 | 2071.3 | 2071.3 | 2071.3 | 2071.3 | 2071.3 | 2071.3 | 2071.3 | 2071.3 | 2071.3 | 2071.3 | 2071.3 | 2071.3 |
| ZWE Zimbabwe                | 2071.3 | 2071.3 | 2071.3 | 2071.3 | 2071.3 | 2071.3 | 2071.3 | 2071.3 | 2071.3 | 2071.3 | 2071.3 | 2071.3 | 2071.3 | 2071.3 |
| Western sub-Saharan Africa  | 2071.3 | 2071.3 | 2071.3 | 2071.3 | 2071.3 | 2071.3 | 2071.3 | 2071.3 | 2071.3 | 2071.3 | 2071.3 | 2071.3 | 2071.3 | 2071.3 |
| BEN Benin                   | 2071.3 | 2071.3 | 2071.3 | 2071.3 | 2071.3 | 2071.3 | 2071.3 | 2071.3 | 2071.3 | 2071.3 | 2071.3 | 2071.3 | 2071.3 | 2071.3 |
| BFA Burkina Faso            | 2071.3 | 2071.3 | 2071.3 | 2071.3 | 2071.3 | 2071.3 | 2071.3 | 2071.3 | 2071.3 | 2071.3 | 2071.3 | 2071.3 | 2071.3 | 2071.3 |
| CMR Cameroon                | 2071.3 | 2071.3 | 2071.3 | 2071.3 | 2071.3 | 2071.3 | 2071.3 | 2071.3 | 2071.3 | 2071.3 | 2071.3 | 2071.3 | 2071.3 | 2071.3 |
| CPV Cape Verde              | 2071.3 | 2071.3 | 2071.3 | 2071.3 | 2071.3 | 2071.3 | 2071.3 | 2071.3 | 2071.3 | 2071.3 | 2071.3 | 2071.3 | 2071.3 | 2071.3 |
| ICD Chad                    | 2071.3 | 2071.3 | 2071.3 | 2071.3 | 2071.3 | 2071.3 | 2071.3 | 2071.3 | 2071.3 | 2071.3 | 2071.3 | 2071.3 | 2071.3 | 2071.3 |
| COG Congo (Brazzaville)     | 2071.3 | 2071.3 | 2071.3 | 2071.3 | 2071.3 | 2071.3 | 2071.3 | 2071.3 | 2071.3 | 2071.3 | 2071.3 | 2071.3 | 2071.3 | 2071.3 |
| OMI The Gambia              | 2071.3 | 2071.3 | 2071.3 | 2071.3 | 2071.3 | 2071.3 | 2071.3 | 2071.3 | 2071.3 | 2071.3 | 2071.3 | 2071.3 | 2071.3 | 2071.3 |
| GIN Guinea                  | 2071.3 | 2071.3 | 2071.3 | 2071.3 | 2071.3 | 2071.3 | 2071.3 | 2071.3 | 2071.3 | 2071.3 | 2071.3 | 2071.3 | 2071.3 | 2071.3 |
| GNB Guinea-Bissau           | 2071.3 | 2071.3 | 2071.3 | 2071.3 | 2071.3 | 2071.3 | 2071.3 | 2071.3 | 2071.3 | 2071.3 | 2071.3 | 2071.3 | 2071.3 | 2071.3 |
| LRB Liberia                 | 2071.3 | 2071.3 | 2071.3 | 2071.3 | 2071.3 | 2071.3 | 2071.3 | 2071.3 | 2071.3 | 2071.3 | 2071.3 | 2071.3 | 2071.3 | 2071.3 |
| MLI Mali                    | 2071.3 | 2071.3 | 2071.3 | 2071.3 | 2071.3 | 2071.3 | 2071.3 | 2071.3 | 2071.3 | 2071.3 | 2071.3 | 2071.3 | 2071.3 | 2071.3 |
| MRT Mauritania              | 2071.3 | 2071.3 | 2071.3 | 2071.3 | 2071.3 | 2071.3 | 2071.3 | 2071.3 | 2071.3 | 2071.3 | 2071.3 | 2071.3 | 2071.3 | 2071.3 |
| NER Niger                   | 2071.3 | 2071.3 | 2071.3 | 2071.3 | 2071.3 | 2071.3 | 2071.3 | 2071.3 | 2071.3 | 2071.3 | 2071.3 | 2071.3 | 2071.3 | 2071.3 |
| NGA Nigeria                 | 2071.3 | 2071.3 | 2071.3 | 2071.3 | 2071.3 | 2071.3 | 2071.3 | 2071.3 | 2071.3 | 2071.3 | 2071.3 | 2071.3 | 2071.3 | 2071.3 |
| STP Sao Tome and Principe   | 2071.3 | 2071.3 | 2071.3 | 2071.3 | 2071.3 | 2071.3 | 2071.3 | 2071.3 | 2071.3 | 2071.3 | 2071.3 | 2071.3 | 2071.3 | 2071.3 |
| SEN Senegal                 | 2071.3 | 2071.3 | 2071.3 | 2071.3 | 2071.3 | 2071.3 | 2071.3 | 2071.3 | 2071.3 | 2071.3 | 2071.3 | 2071.3 | 2071.3 | 2071.3 |
| SIERRA Leone                | 2071.3 | 2071.3 | 2071.3 | 2071.3 | 2071.3 | 2071.3 | 2071.3 | 2071.3 | 2071.3 | 2071.3 | 2071.3 | 2071.3 | 2071.3 | 2071.3 |
| TGO Togo                    | 2071.3 | 2071.3 | 2071.3 | 2071.3 | 2071.3 | 2071.3 | 2071.3 | 2071.3 | 2071.3 | 2071.3 | 2071.3 | 2071.3 | 2071.3 | 2071.3 |









Table 2 Under-5 death numbers by location and year for 1950, 1955, 2005, 2010, 2017 - both sexes

| Location | 1950 | 1955 | 1960 | 1965 | 1970 | 1975 | 1980 | 1985 | 1990 | 1995 | 2000 | 2005 | 2010 | 2017 |
|----------|------|------|------|------|------|------|------|------|------|------|------|------|------|------|
| Algeria  | 115  | 100  | 80   | 65   | 50   | 40   | 30   | 20   | 15   | 10   | 5    | 3    | 2    | 1    |
| Algeria  | 115  | 100  | 80   | 65   | 50   | 40   | 30   | 20   | 15   | 10   | 5    | 3    | 2    | 1    |
| Algeria  | 115  | 100  | 80   | 65   | 50   | 40   | 30   | 20   | 15   | 10   | 5    | 3    | 2    | 1    |
| Algeria  | 115  | 100  | 80   | 65   | 50   | 40   | 30   | 20   | 15   | 10   | 5    | 3    | 2    | 1    |
| Algeria  | 115  | 100  | 80   | 65   | 50   | 40   | 30   | 20   | 15   | 10   | 5    | 3    | 2    | 1    |



Table 2 Under-5 death numbers by location and year for 1950, 1955, 2005, 2010, 2017 - both sexes

| Location             | 1950 | 1955 | 1960 | 1965 | 1970 | 1975 | 1980 | 1985 | 1990 | 1995 | 2000 | 2005 | 2010 | 2017 |
|----------------------|------|------|------|------|------|------|------|------|------|------|------|------|------|------|
| Tanzania             | 210  | 211  | 209  | 211  | 214  | 215  | 216  | 215  | 212  | 209  | 206  | 205  | 204  | 201  |
| Taiwan               | 590  | 594  | 598  | 603  | 608  | 613  | 618  | 623  | 628  | 633  | 638  | 643  | 648  | 653  |
| Tajikistan           | 6    | 7    | 8    | 9    | 10   | 11   | 12   | 13   | 14   | 15   | 16   | 17   | 18   | 19   |
| Togo                 | 6    | 6    | 6    | 6    | 6    | 6    | 6    | 6    | 6    | 6    | 6    | 6    | 6    | 6    |
| Uganda               | 100  | 101  | 102  | 103  | 104  | 105  | 106  | 107  | 108  | 109  | 110  | 111  | 112  | 113  |
| United Arab Emirates | 12   | 12   | 12   | 12   | 12   | 12   | 12   | 12   | 12   | 12   | 12   | 12   | 12   | 12   |
| Uruguay              | 15   | 15   | 15   | 15   | 15   | 15   | 15   | 15   | 15   | 15   | 15   | 15   | 15   | 15   |
| Uzbekistan           | 15   | 15   | 15   | 15   | 15   | 15   | 15   | 15   | 15   | 15   | 15   | 15   | 15   | 15   |
| Vietnam              | 15   | 15   | 15   | 15   | 15   | 15   | 15   | 15   | 15   | 15   | 15   | 15   | 15   | 15   |
| Yemen                | 15   | 15   | 15   | 15   | 15   | 15   | 15   | 15   | 15   | 15   | 15   | 15   | 15   | 15   |
| Zambia               | 15   | 15   | 15   | 15   | 15   | 15   | 15   | 15   | 15   | 15   | 15   | 15   | 15   | 15   |











Table 3 Under-5 death numbers by location and year for 1950, 1955, 2005, 2010, 2017 - females

| Location      | 1950   | 1955  | 1960  | 1965  | 1970  | 1975  | 1980  | 1985  | 1990  | 1995  | 2000  | 2005  | 2010  | 2017  |
|---------------|--------|-------|-------|-------|-------|-------|-------|-------|-------|-------|-------|-------|-------|-------|
| Algeria       | (4.30) | (5.7) | (4.5) | (4.5) | (4.5) | (5.4) | (5.4) | (5.2) | (5.2) | (5.2) | (5.1) | (5.1) | (5.1) | (5.1) |
| Bahia         | (0.1)  | (0.1) | (0.1) | (0.1) | (0.1) | (0.1) | (0.1) | (0.1) | (0.1) | (0.1) | (0.1) | (0.1) | (0.1) | (0.1) |
| Benin         | (1.1)  | (1.1) | (1.1) | (1.1) | (1.1) | (1.1) | (1.1) | (1.1) | (1.1) | (1.1) | (1.1) | (1.1) | (1.1) | (1.1) |
| Burkina Faso  | (0.0)  | (0.0) | (0.0) | (0.0) | (0.0) | (0.0) | (0.0) | (0.0) | (0.0) | (0.0) | (0.0) | (0.0) | (0.0) | (0.0) |
| Cameroon      | (0.9)  | (0.9) | (0.9) | (0.9) | (0.9) | (0.9) | (0.9) | (0.9) | (0.9) | (0.9) | (0.9) | (0.9) | (0.9) | (0.9) |
| Chad          | (1.6)  | (1.6) | (1.6) | (1.6) | (1.6) | (1.6) | (1.6) | (1.6) | (1.6) | (1.6) | (1.6) | (1.6) | (1.6) | (1.6) |
| Cote d'Ivoire | (2.3)  | (2.3) | (2.3) | (2.3) | (2.3) | (2.3) | (2.3) | (2.3) | (2.3) | (2.3) | (2.3) | (2.3) | (2.3) | (2.3) |
| DRC           | (2.1)  | (2.1) | (2.1) | (2.1) | (2.1) | (2.1) | (2.1) | (2.1) | (2.1) | (2.1) | (2.1) | (2.1) | (2.1) | (2.1) |
| Egypt         | (2.3)  | (2.3) | (2.3) | (2.3) | (2.3) | (2.3) | (2.3) | (2.3) | (2.3) | (2.3) | (2.3) | (2.3) | (2.3) | (2.3) |
| Guinea        | (1.2)  | (1.2) | (1.2) | (1.2) | (1.2) | (1.2) | (1.2) | (1.2) | (1.2) | (1.2) | (1.2) | (1.2) | (1.2) | (1.2) |
| India         | (3.1)  | (3.1) | (3.1) | (3.1) | (3.1) | (3.1) | (3.1) | (3.1) | (3.1) | (3.1) | (3.1) | (3.1) | (3.1) | (3.1) |
| Indonesia     | (0.1)  | (0.1) | (0.1) | (0.1) | (0.1) | (0.1) | (0.1) | (0.1) | (0.1) | (0.1) | (0.1) | (0.1) | (0.1) | (0.1) |
| Kenya         | (0.1)  | (0.1) | (0.1) | (0.1) | (0.1) | (0.1) | (0.1) | (0.1) | (0.1) | (0.1) | (0.1) | (0.1) | (0.1) | (0.1) |
| Korea         | (0.1)  | (0.1) | (0.1) | (0.1) | (0.1) | (0.1) | (0.1) | (0.1) | (0.1) | (0.1) | (0.1) | (0.1) | (0.1) | (0.1) |
| Madagascar    | (0.1)  | (0.1) | (0.1) | (0.1) | (0.1) | (0.1) | (0.1) | (0.1) | (0.1) | (0.1) | (0.1) | (0.1) | (0.1) | (0.1) |
| Mali          | (0.1)  | (0.1) | (0.1) | (0.1) | (0.1) | (0.1) | (0.1) | (0.1) | (0.1) | (0.1) | (0.1) | (0.1) | (0.1) | (0.1) |
| Morocco       | (0.1)  | (0.1) | (0.1) | (0.1) | (0.1) | (0.1) | (0.1) | (0.1) | (0.1) | (0.1) | (0.1) | (0.1) | (0.1) | (0.1) |
| Niger         | (0.1)  | (0.1) | (0.1) | (0.1) | (0.1) | (0.1) | (0.1) | (0.1) | (0.1) | (0.1) | (0.1) | (0.1) | (0.1) | (0.1) |
| Nigeria       | (0.1)  | (0.1) | (0.1) | (0.1) | (0.1) | (0.1) | (0.1) | (0.1) | (0.1) | (0.1) | (0.1) | (0.1) | (0.1) | (0.1) |
| Rwanda        | (0.1)  | (0.1) | (0.1) | (0.1) | (0.1) | (0.1) | (0.1) | (0.1) | (0.1) | (0.1) | (0.1) | (0.1) | (0.1) | (0.1) |
| Senegal       | (0.1)  | (0.1) | (0.1) | (0.1) | (0.1) | (0.1) | (0.1) | (0.1) | (0.1) | (0.1) | (0.1) | (0.1) | (0.1) | (0.1) |
| Sierra Leone  | (0.1)  | (0.1) | (0.1) | (0.1) | (0.1) | (0.1) | (0.1) | (0.1) | (0.1) | (0.1) | (0.1) | (0.1) | (0.1) | (0.1) |
| Sudan         | (0.1)  | (0.1) | (0.1) | (0.1) | (0.1) | (0.1) | (0.1) | (0.1) | (0.1) | (0.1) | (0.1) | (0.1) | (0.1) | (0.1) |
| Tanzania      | (0.1)  | (0.1) | (0.1) | (0.1) | (0.1) | (0.1) | (0.1) | (0.1) | (0.1) | (0.1) | (0.1) | (0.1) | (0.1) | (0.1) |
| Togo          | (0.1)  | (0.1) | (0.1) | (0.1) | (0.1) | (0.1) | (0.1) | (0.1) | (0.1) | (0.1) | (0.1) | (0.1) | (0.1) | (0.1) |
| Tunisia       | (0.1)  | (0.1) | (0.1) | (0.1) | (0.1) | (0.1) | (0.1) | (0.1) | (0.1) | (0.1) | (0.1) | (0.1) | (0.1) | (0.1) |
| Zambia        | (0.1)  | (0.1) | (0.1) | (0.1) | (0.1) | (0.1) | (0.1) | (0.1) | (0.1) | (0.1) | (0.1) | (0.1) | (0.1) | (0.1) |
| Zimbabwe      | (0.1)  | (0.1) | (0.1) | (0.1) | (0.1) | (0.1) | (0.1) | (0.1) | (0.1) | (0.1) | (0.1) | (0.1) | (0.1) | (0.1) |
| World         | (4.5)  | (4.5) | (4.5) | (4.5) | (4.5) | (4.5) | (4.5) | (4.5) | (4.5) | (4.5) | (4.5) | (4.5) | (4.5) | (4.5) |

Table 3 Under-5 death numbers by location and year for 1950, 1955, 2005, 2010, 2017 - females

| Location   | 1950 | 1955 | 1960 | 1965 | 1970 | 1975 | 1980 | 1985 | 1990 | 1995 | 2000 | 2005 | 2010 | 2017 |
|------------|------|------|------|------|------|------|------|------|------|------|------|------|------|------|
| Tanzania   | 125  | 124  | 124  | 114  | 114  | 107  | 82   | 49   | 49   | 49   | 32   | 23   | 14   | 8    |
| Togo       | 45   | 45   | 45   | 45   | 45   | 45   | 45   | 45   | 45   | 45   | 45   | 45   | 45   | 45   |
| Tonga      | 20   | 20   | 20   | 20   | 20   | 20   | 20   | 20   | 20   | 20   | 20   | 20   | 20   | 20   |
| Turkey     | 4    | 4    | 4    | 4    | 4    | 4    | 4    | 4    | 4    | 4    | 4    | 4    | 4    | 4    |
| Uganda     | 514  | 514  | 514  | 514  | 514  | 514  | 514  | 514  | 514  | 514  | 514  | 514  | 514  | 514  |
| Uzbekistan | 5    | 5    | 5    | 5    | 5    | 5    | 5    | 5    | 5    | 5    | 5    | 5    | 5    | 5    |
| Vietnam    | 125  | 124  | 124  | 114  | 114  | 107  | 82   | 49   | 49   | 49   | 32   | 23   | 14   | 8    |
| Yemen      | 20   | 20   | 20   | 20   | 20   | 20   | 20   | 20   | 20   | 20   | 20   | 20   | 20   | 20   |
| Zambia     | 4    | 4    | 4    | 4    | 4    | 4    | 4    | 4    | 4    | 4    | 4    | 4    | 4    | 4    |
| Zimbabwe   | 514  | 514  | 514  | 514  | 514  | 514  | 514  | 514  | 514  | 514  | 514  | 514  | 514  | 514  |
| World      | 125  | 124  | 124  | 114  | 114  | 107  | 82   | 49   | 49   | 49   | 32   | 23   | 14   | 8    |















Table 4 Under-5 death numbers by location and year for 1950, 1955, 2005, 2010, 2017 - males

| Location     | 1950 | 1955 | 1960 | 1965 | 1970 | 1975 | 1980 | 1985 | 1990 | 1995 | 2000 | 2005 | 2010 | 2017 |
|--------------|------|------|------|------|------|------|------|------|------|------|------|------|------|------|
| Tanzania     | 165  | 165  | 164  | 176  | 176  | 179  | 193  | 217  | 243  | 266  | 284  | 294  | 294  | 294  |
| Togo         | 125  | 125  | 125  | 125  | 125  | 125  | 125  | 125  | 125  | 125  | 125  | 125  | 125  | 125  |
| Taiwan       | 41   | 45   | 45   | 45   | 45   | 45   | 45   | 45   | 45   | 45   | 45   | 45   | 45   | 45   |
| Tajikistan   | 4    | 4    | 4    | 4    | 4    | 4    | 4    | 4    | 4    | 4    | 4    | 4    | 4    | 4    |
| Togo         | 4    | 4    | 4    | 4    | 4    | 4    | 4    | 4    | 4    | 4    | 4    | 4    | 4    | 4    |
| Turkmenistan | 4    | 4    | 4    | 4    | 4    | 4    | 4    | 4    | 4    | 4    | 4    | 4    | 4    | 4    |
| Uganda       | 4    | 4    | 4    | 4    | 4    | 4    | 4    | 4    | 4    | 4    | 4    | 4    | 4    | 4    |
| Uzbekistan   | 4    | 4    | 4    | 4    | 4    | 4    | 4    | 4    | 4    | 4    | 4    | 4    | 4    | 4    |
| Vietnam      | 4    | 4    | 4    | 4    | 4    | 4    | 4    | 4    | 4    | 4    | 4    | 4    | 4    | 4    |
| Yemen        | 4    | 4    | 4    | 4    | 4    | 4    | 4    | 4    | 4    | 4    | 4    | 4    | 4    | 4    |
| Zambia       | 4    | 4    | 4    | 4    | 4    | 4    | 4    | 4    | 4    | 4    | 4    | 4    | 4    | 4    |
| Zimbabwe     | 4    | 4    | 4    | 4    | 4    | 4    | 4    | 4    | 4    | 4    | 4    | 4    | 4    | 4    |
| World        | 4    | 4    | 4    | 4    | 4    | 4    | 4    | 4    | 4    | 4    | 4    | 4    | 4    | 4    |

Table 4 Under-5 death numbers by location and year for 1950, 1955, 2005, 2010, 2017 - males

| Location                    | 1950      | 1955      | 1960      | 1965      | 1970      | 1975      | 1980      | 1985      | 1990      | 1995      | 2000      | 2005      | 2010      | 2017      |
|-----------------------------|-----------|-----------|-----------|-----------|-----------|-----------|-----------|-----------|-----------|-----------|-----------|-----------|-----------|-----------|
| Turkmen                     | (0-1)     | (0-1)     | (0-1)     | (0-1)     | (0-1)     | (0-1)     | (0-1)     | (0-1)     | (0-1)     | (0-1)     | (0-1)     | (0-1)     | (0-1)     | (0-1)     |
| Urain Ghub                  | 0         | 0         | 0         | 0         | 0         | 0         | 0         | 0         | 0         | 0         | 0         | 0         | 0         | 0         |
| Vilpaj                      | (0-0)     | (0-0)     | (0-0)     | (0-0)     | (0-0)     | (0-0)     | (0-0)     | (0-1)     | (0-1)     | (0-1)     | (0-1)     | (0-1)     | (0-1)     | (0-0)     |
| Wajr                        | (0-0)     | (0-0)     | (0-0)     | (0-0)     | (0-0)     | (0-1)     | (0-1)     | (0-1)     | (0-1)     | (0-1)     | (0-1)     | (0-1)     | (0-1)     | (0-1)     |
| West Pakt                   | 0         | 0         | 0         | 0         | 0         | 0         | 0         | 0         | 0         | 0         | 0         | 0         | 0         | 0         |
| Madagascar                  | (18-31)   | (21-32)   | (23-34)   | (26-37)   | (30-41)   | (34-45)   | (38-49)   | (42-53)   | (46-57)   | (50-61)   | (54-65)   | (58-69)   | (62-73)   | (66-77)   |
| Malawi                      | (30-43)   | (34-47)   | (38-51)   | (42-55)   | (46-59)   | (50-63)   | (54-67)   | (58-71)   | (62-75)   | (66-79)   | (70-83)   | (74-87)   | (78-91)   | (82-95)   |
| Mozambique                  | (43-56)   | (47-60)   | (51-64)   | (55-68)   | (59-72)   | (63-76)   | (67-80)   | (71-84)   | (75-88)   | (79-92)   | (83-96)   | (87-100)  | (91-104)  | (95-108)  |
| Rwanda                      | 20        | 21        | 22        | 23        | 24        | 25        | 26        | 27        | 28        | 29        | 30        | 31        | 32        | 33        |
| Somalia                     | (14-25)   | (15-26)   | (16-27)   | (17-28)   | (18-29)   | (19-30)   | (20-31)   | (21-32)   | (22-33)   | (23-34)   | (24-35)   | (25-36)   | (26-37)   | (27-38)   |
| South Sudan                 | 16        | 17        | 18        | 19        | 20        | 21        | 22        | 23        | 24        | 25        | 26        | 27        | 28        | 29        |
| Tanzania                    | (11-20)   | (12-21)   | (13-22)   | (14-23)   | (15-24)   | (16-25)   | (17-26)   | (18-27)   | (19-28)   | (20-29)   | (21-30)   | (22-31)   | (23-32)   | (24-33)   |
| Uganda                      | (44)      | (45)      | (46)      | (47)      | (48)      | (49)      | (50)      | (51)      | (52)      | (53)      | (54)      | (55)      | (56)      | (57)      |
| Yemen                       | (31-58)   | (32-59)   | (33-60)   | (34-61)   | (35-62)   | (36-63)   | (37-64)   | (38-65)   | (39-66)   | (40-67)   | (41-68)   | (42-69)   | (43-70)   | (44-71)   |
| South Africa                | (14-24)   | (15-25)   | (16-26)   | (17-27)   | (18-28)   | (19-29)   | (20-30)   | (21-31)   | (22-32)   | (23-33)   | (24-34)   | (25-35)   | (26-36)   | (27-37)   |
| Southern sub-Saharan Africa | (58-77)   | (60-79)   | (62-81)   | (64-83)   | (66-85)   | (68-87)   | (70-89)   | (72-91)   | (74-93)   | (76-95)   | (78-97)   | (80-99)   | (82-101)  | (84-103)  |
| Botswana                    | (1-2)     | (1-2)     | (1-2)     | (1-2)     | (1-2)     | (1-2)     | (1-2)     | (1-2)     | (1-2)     | (1-2)     | (1-2)     | (1-2)     | (1-2)     | (1-2)     |
| Lesotho                     | 3         | 3         | 3         | 3         | 3         | 3         | 3         | 3         | 3         | 3         | 3         | 3         | 3         | 3         |
| Namibia                     | (2-3)     | (2-3)     | (2-3)     | (2-3)     | (2-3)     | (2-3)     | (2-3)     | (2-3)     | (2-3)     | (2-3)     | (2-3)     | (2-3)     | (2-3)     | (2-3)     |
| South Africa                | (41-56)   | (42-57)   | (43-58)   | (44-59)   | (45-60)   | (46-61)   | (47-62)   | (48-63)   | (49-64)   | (50-65)   | (51-66)   | (52-67)   | (53-68)   | (54-69)   |
| Swaziland                   | (1-2)     | (1-2)     | (1-2)     | (1-2)     | (1-2)     | (1-2)     | (1-2)     | (1-2)     | (1-2)     | (1-2)     | (1-2)     | (1-2)     | (1-2)     | (1-2)     |
| Zimbabwe                    | (8-15)    | (9-16)    | (10-17)   | (11-18)   | (12-19)   | (13-20)   | (14-21)   | (15-22)   | (16-23)   | (17-24)   | (18-25)   | (19-26)   | (20-27)   | (21-28)   |
| Western sub-Saharan Africa  | (67-84)   | (69-86)   | (71-88)   | (73-90)   | (75-92)   | (77-94)   | (79-96)   | (81-98)   | (83-100)  | (85-102)  | (87-104)  | (89-106)  | (91-108)  | (93-110)  |
| Benin                       | 20        | 19        | 18        | 17        | 16        | 15        | 14        | 13        | 12        | 11        | 10        | 9         | 8         | 7         |
| Burkina Faso                | (13-54)   | (14-55)   | (15-56)   | (16-57)   | (17-58)   | (18-59)   | (19-60)   | (20-61)   | (21-62)   | (22-63)   | (23-64)   | (24-65)   | (25-66)   | (26-67)   |
| Cameroon                    | (35-41)   | (36-42)   | (37-43)   | (38-44)   | (39-45)   | (40-46)   | (41-47)   | (42-48)   | (43-49)   | (44-50)   | (45-51)   | (46-52)   | (47-53)   | (48-54)   |
| Cape Verde                  | 1         | 1         | 1         | 1         | 1         | 1         | 1         | 1         | 1         | 1         | 1         | 1         | 1         | 1         |
| Chad                        | (18-32)   | (19-33)   | (20-34)   | (21-35)   | (22-36)   | (23-37)   | (24-38)   | (25-39)   | (26-40)   | (27-41)   | (28-42)   | (29-43)   | (30-44)   | (31-45)   |
| Cote d'Ivoire               | (26-29)   | (27-30)   | (28-31)   | (29-32)   | (30-33)   | (31-34)   | (32-35)   | (33-36)   | (34-37)   | (35-38)   | (36-39)   | (37-40)   | (38-41)   | (39-42)   |
| The Gambia                  | (1-3)     | (1-3)     | (1-3)     | (1-3)     | (1-3)     | (1-3)     | (1-3)     | (1-3)     | (1-3)     | (1-3)     | (1-3)     | (1-3)     | (1-3)     | (1-3)     |
| Ghana                       | (36-59)   | (38-61)   | (40-63)   | (42-65)   | (44-67)   | (46-69)   | (48-71)   | (50-73)   | (52-75)   | (54-77)   | (56-79)   | (58-81)   | (60-83)   | (62-85)   |
| Guinea                      | (24-49)   | (25-50)   | (26-51)   | (27-52)   | (28-53)   | (29-54)   | (30-55)   | (31-56)   | (32-57)   | (33-58)   | (34-59)   | (35-60)   | (36-61)   | (37-62)   |
| Guinea-Bissau               | 7         | 7         | 7         | 6         | 6         | 6         | 6         | 6         | 5         | 5         | 5         | 4         | 4         | 3         |
| Liberia                     | (7-13)    | (8-14)    | (9-15)    | (10-16)   | (11-17)   | (12-18)   | (13-19)   | (14-20)   | (15-21)   | (16-22)   | (17-23)   | (18-24)   | (19-25)   | (20-26)   |
| Madagascar                  | (43-76)   | (45-78)   | (47-80)   | (49-82)   | (51-84)   | (53-86)   | (55-88)   | (57-90)   | (59-92)   | (61-94)   | (63-96)   | (65-98)   | (67-100)  | (69-102)  |
| Mali                        | 5         | 5         | 5         | 5         | 5         | 5         | 5         | 5         | 5         | 5         | 5         | 5         | 5         | 5         |
| Mauritania                  | (4-9)     | (4-9)     | (4-9)     | (4-9)     | (4-9)     | (4-9)     | (4-9)     | (4-9)     | (4-9)     | (4-9)     | (4-9)     | (4-9)     | (4-9)     | (4-9)     |
| Niger                       | (24-41)   | (25-42)   | (26-43)   | (27-44)   | (28-45)   | (29-46)   | (30-47)   | (31-48)   | (32-49)   | (33-50)   | (34-51)   | (35-52)   | (36-53)   | (37-54)   |
| Nigeria                     | (206-492) | (208-494) | (209-495) | (210-496) | (211-497) | (212-498) | (213-499) | (214-500) | (215-501) | (216-502) | (217-503) | (218-504) | (219-505) | (220-506) |
| Sao Tome and Principe       | 1         | 0         | 0         | 0         | 0         | 0         | 0         | 0         | 0         | 0         | 0         | 0         | 0         | 0         |
| Senegal                     | (16-26)   | (17-27)   | (18-28)   | (19-29)   | (20-30)   | (21-31)   | (22-32)   | (23-33)   | (24-34)   | (25-35)   | (26-36)   | (27-37)   | (28-38)   | (29-39)   |
| Sierra Leone                | (11-27)   | (12-28)   | (13-29)   | (14-30)   | (15-31)   | (16-32)   | (17-33)   | (18-34)   | (19-35)   | (20-36)   | (21-37)   | (22-38)   | (23-39)   | (24-40)   |
| Togo                        | (8-17)    | (9-18)    | (10-19)   | (11-20)   | (12-21)   | (13-22)   | (14-23)   | (15-24)   | (16-25)   | (17-26)   | (18-27)   | (19-28)   | (20-29)   | (21-30)   |



Table 5 Life expectancy at birth in 2015 from UN, WHO, census, and GBD 2017

| Location                         | GBD 2017 Female | GBD 2017 Male | WPP 2017 Female | WPP 2017 Male | WHO Female | WHO Male | US Census Bureau Female | US Census Bureau Male |
|----------------------------------|-----------------|---------------|-----------------|---------------|------------|----------|-------------------------|-----------------------|
| Afghanistan                      | 61.7            | 60.6          | 64.87           | 62.358        | 64.7       | 61.8     | 52.3                    | 49.5                  |
| Albania                          | 81.8            | 74.8          | 80.668          | 77.128        | 78.2       | 74.2     | 81.0                    | 75.5                  |
| Algeria                          | 77.8            | 76.5          | 77.276          | 74.976        | 77.2       | 75.3     | 78.0                    | 75.3                  |
| Angola                           | 65.8            | 60.8          | 65.88           | 60.056        | 64.5       | 59.9     | 56.8                    | 54.5                  |
| Antigua and Barbuda              | 78.7            | 75.0          | 78.72           | 73.728        | 77.4       | 72.5     | 78.5                    | 74.2                  |
| Argentina                        | 79.5            | 73.4          | 80.322          | 72.636        | 80.1       | 73.3     | 80.2                    | 73.8                  |
| Armenia                          | 78.4            | 72.0          | 77.744          | 71.408        | 77.9       | 70.9     | 78.0                    | 71.1                  |
| Australia                        | 84.6            | 80.4          | 84.794          | 80.822        | 84.5       | 80.6     | 84.7                    | 79.7                  |
| Austria                          | 83.9            | 79.0          | 83.894          | 79.012        | 83.8       | 78.9     | 84.2                    | 78.8                  |
| Azerbaijan                       | 74.4            | 66.9          | 75.27           | 69.606        | 75.5       | 70.2     | 75.5                    | 69.2                  |
| Bahrain                          | 80.1            | 78.7          | 77.916          | 76.03         | 79.4       | 78.3     | 81.0                    | 76.5                  |
| Bangladesh                       | 73.8            | 71.4          | 74.684          | 70.756        | 74         | 70.7     | 75.1                    | 70.8                  |
| Barbados                         | 78.5            | 75.5          | 78.22           | 73.378        | 77.9       | 72.9     | 77.6                    | 72.8                  |
| Belarus                          | 78.8            | 68.5          | 79.174          | 68.328        | 78.8       | 68.6     | 78.4                    | 66.9                  |
| Belgium                          | 83.3            | 78.5          | 83.438          | 78.678        | 83.2       | 78.6     | 83.6                    | 78.3                  |
| Belize                           | 77.3            | 71.1          | 72.918          | 67.304        | 73.2       | 67.7     | 70.3                    | 67.0                  |
| Benin                            | 65.6            | 61.5          | 62.2            | 59.276        | 62         | 59.3     | 62.9                    | 60.1                  |
| Bhutan                           | 75.4            | 71.8          | 70.202          | 70.01         | 70.3       | 70       | 70.5                    | 68.6                  |
| Bosnia and Herzegovina           | 78.6            | 74.2          | 79.27           | 74.214        | 79.6       | 74.5     | 79.8                    | 73.5                  |
| Botswana                         | 68.5            | 65.1          | 70.6            | 62.986        | 67.9       | 62.6     | 52.3                    | 56.0                  |
| Brazil                           | 79.0            | 71.9          | 79.328          | 72.082        | 78.6       | 71.2     | 77.3                    | 70.0                  |
| Bulgaria                         | 78.3            | 71.4          | 78.404          | 71.532        | 78.3       | 71.2     | 77.9                    | 71.1                  |
| Burkina Faso                     | 63.4            | 58.0          | 61.312          | 60.09         | 60.4       | 59.1     | 57.2                    | 53.1                  |
| Burundi                          | 62.8            | 58.9          | 59.636          | 55.488        | 61.4       | 58       | 61.8                    | 58.5                  |
| Cambodia                         | 72.1            | 66.2          | 70.87           | 67.162        | 70.8       | 67       | 66.7                    | 61.7                  |
| Cameroon                         | 63.1            | 59.4          | 59.078          | 56.118        | 58.8       | 55.7     | 59.3                    | 56.6                  |
| Canada                           | 83.8            | 79.6          | 84.26           | 80.44         | 84.5       | 80.6     | 84.5                    | 79.2                  |
| Central African Republic         | 53.2            | 48.8          | 53.204          | 49.72         | 53.5       | 51.6     | 53.2                    | 50.5                  |
| Chad                             | 60.9            | 57.8          | 54.726          | 52.002        | 54.9       | 52.5     | 51.0                    | 48.6                  |
| Chile                            | 82.2            | 77.0          | 81.626          | 76.666        | 82.3       | 76.4     | 81.8                    | 75.6                  |
| China                            | 79.3            | 74.0          | 77.776          | 74.854        | 77.7       | 74.8     | 77.7                    | 73.4                  |
| Colombia                         | 82.4            | 77.4          | 77.858          | 70.778        | 78.6       | 71.3     | 78.8                    | 72.3                  |
| Comoros                          | 69.4            | 66.6          | 65.694          | 62.334        | 65.2       | 62       | 66.2                    | 61.6                  |
| Congo                            | 62.2            | 62.2          | 67.05           | 63.606        | 64.8       | 62.4     | 60.0                    | 57.6                  |
| Costa Rica                       | 83.0            | 76.9          | 82.206          | 77.084        | 82.1       | 76.9     | 81.2                    | 75.8                  |
| Croatia                          | 80.5            | 74.6          | 80.89           | 74.282        | 80.6       | 74.3     | 79.0                    | 72.5                  |
| Cuba                             | 80.5            | 76.0          | 81.588          | 77.37         | 81         | 76.6     | 81.0                    | 76.2                  |
| Cyprus                           | 84.9            | 78.3          | 82.812          | 78.194        | 82.9       | 78.2     | 81.5                    | 75.7                  |
| Democratic Republic of the Congo | 63.1            | 59.4          | 61.096          | 58.248        | 61.6       | 58.5     | 58.5                    | 55.4                  |
| Denmark                          | 82.8            | 78.9          | 82.994          | 79.138        | 82.8       | 78.9     | 81.8                    | 76.8                  |
| Djibouti                         | 67.8            | 65.0          | 64.86           | 61.504        | 65.3       | 62       | 65.4                    | 60.3                  |
| Dominican Republic               | 76.4            | 69.5          | 77.05           | 70.748        | 76.4       | 70.3     | 80.3                    | 75.8                  |
| Ecuador                          | 78.7            | 74.5          | 78.868          | 73.474        | 78.8       | 73.9     | 79.7                    | 73.6                  |
| Egypt                            | 73.8            | 67.6          | 73.554          | 69.364        | 72.6       | 68.1     | 73.9                    | 71.1                  |
| El Salvador                      | 77.4            | 66.5          | 77.95           | 68.76         | 77.9       | 68.7     | 77.9                    | 71.1                  |
| Equatorial Guinea                | 65.1            | 63.9          | 59.73           | 56.548        | 61.7       | 57.6     | 65.0                    | 62.8                  |
| Eritrea                          | 65.1            | 57.9          | 67.236          | 62.948        | 66.7       | 62.5     | 67.1                    | 62.1                  |
| Estonia                          | 81.8            | 73.1          | 82.55           | 73.968        | 81.8       | 73       | 81.5                    | 71.6                  |
| Ethiopia                         | 69.1            | 65.6          | 68.422          | 64.53         | 66.8       | 63.3     | 63.9                    | 59.1                  |
| Fiji                             | 70.2            | 65.7          | 73.484          | 67.434        | 73         | 67       | 75.2                    | 69.8                  |
| Finland                          | 84.3            | 78.8          | 84.126          | 78.584        | 84.2       | 78.6     | 83.9                    | 77.8                  |
| France                           | 85.5            | 79.4          | 85.4            | 79.606        | 85.4       | 79.8     | 85.0                    | 78.7                  |
| Gabon                            | 70.0            | 64.1          | 68.192          | 64.552        | 67.5       | 64.3     | 52.5                    | 51.6                  |
| Georgia                          | 77.4            | 68.6          | 77.246          | 68.368        | 77.1       | 68.5     | 80.4                    | 71.9                  |
| Germany                          | 83.0            | 78.3          | 83.234          | 78.51         | 83         | 78.2     | 83.0                    | 78.3                  |
| Ghana                            | 67.1            | 61.7          | 63.632          | 61.65         | 64         | 62.2     | 68.7                    | 63.8                  |
| Greece                           | 83.6            | 78.1          | 83.62           | 78.368        | 83.4       | 78.4     | 83.2                    | 77.8                  |
| Grenada                          | 75.2            | 72.8          | 76.304          | 71.482        | 75.8       | 70.9     | 76.9                    | 71.5                  |
| Guatemala                        | 75.9            | 69.7          | 76.74           | 70.402        | 75.8       | 70       | 74.1                    | 70.1                  |
| Guinea                           | 60.7            | 57.8          | 59.602          | 59.196        | 59         | 58.1     | 61.7                    | 58.6                  |
| Guinea-Bissau                    | 61.2            | 56.1          | 58.942          | 55.244        | 60.6       | 57.8     | 52.3                    | 48.2                  |
| Guyana                           | 71.7            | 65.6          | 68.728          | 64.426        | 68.9       | 63.5     | 71.2                    | 65.1                  |
| Haiti                            | 64.9            | 63.0          | 65.716          | 61.362        | 65.6       | 61.1     | 65.9                    | 60.8                  |
| Honduras                         | 74.2            | 69.9          | 75.958          | 70.888        | 77.3       | 72.7     | 72.7                    | 69.3                  |
| Hungary                          | 78.9            | 71.9          | 79.486          | 72.988        | 78.7       | 71.9     | 79.6                    | 72.0                  |
| Iceland                          | 85.6            | 80.0          | 84.128          | 81.192        | 84         | 80.8     | 85.2                    | 80.8                  |
| India                            | 69.6            | 67.2          | 70.584          | 67.134        | 70         | 67.1     | 69.4                    | 67.0                  |
| Indonesia                        | 73.3            | 68.8          | 71.228          | 67.198        | 71.2       | 67.2     | 75.2                    | 69.9                  |
| Iraq                             | 78.2            | 74.5          | 71.59           | 68.13         | 71.8       | 66.9     | 77.2                    | 72.6                  |
| Ireland                          | 83.3            | 79.8          | 83.542          | 79.552        | 83.3       | 79.5     | 83.1                    | 78.4                  |
| Israel                           | 84.4            | 80.7          | 84.194          | 80.656        | 84         | 80       | 84.2                    | 80.4                  |
| Italy                            | 84.8            | 80.2          | 85.02           | 80.524        | 84.6       | 80.2     | 84.9                    | 79.5                  |
| Jamaica                          | 77.4            | 71.9          | 78.538          | 73.922        | 78.3       | 73.3     | 75.2                    | 71.9                  |
| Japan                            | 87.1            | 81.0          | 86.716          | 80.466        | 87         | 80.8     | 88.3                    | 81.4                  |
| Jordan                           | 80.7            | 77.7          | 76.054          | 72.624        | 75.8       | 72.6     | 75.8                    | 73.0                  |
| Kazakhstan                       | 76.0            | 67.2          | 75.052          | 66.534        | 74.9       | 66.1     | 75.5                    | 65.3                  |
| Kenya                            | 67.5            | 62.0          | 71.69           | 65.98         | 68.4       | 63.6     | 65.3                    | 62.3                  |
| Kiribati                         | 65.9            | 58.1          | 69.404          | 62.67         | 68.4       | 63.4     | 68.4                    | 63.4                  |
| Kuwait                           | 86.7            | 80.7          | 75.918          | 73.73         | 75.9       | 73.8     | 79.2                    | 76.5                  |

Table 5 Life expectancy at birth in 2015 from UN, WHO, census, and GBD 2017

| Location                         | GBD 2017 Female | GBD 2017 Male | WPP 2017 Female | WPP 2017 Male | WHO Female | WHO Male  | US Census Bureau Female | US Census Bureau Male |
|----------------------------------|-----------------|---------------|-----------------|---------------|------------|-----------|-------------------------|-----------------------|
| Kyrgyzstan                       | 75.7            | 68.0          | 75.832          | 68.06         | 74.8       | 67.4      | 74.8                    | 66.2                  |
| Latvia                           | 79.5            | 69.9          | 79.716          | 70.488        | 79.3       | 69.8      | 79.1                    | 69.6                  |
| Lebanon                          | 79.8            | 75.5          | 81.554          | 78.024        | 77.6       | 74.8      | 78.7                    | 76.2                  |
| Lesotho                          | 53.7            | 47.4          | 57.404          | 51.53         | 53.8       | 50.1      | 53.0                    | 52.8                  |
| Liberia                          | 62.6            | 61.5          | 63.172          | 61.32         | 63.2       | 61        | 60.3                    | 56.9                  |
| Libya                            | 75.1            | 71.3          | 74.41           | 68.352        | 75.1       | 69.2      | 78.1                    | 74.5                  |
| Lithuania                        | 79.7            | 69.4          | 80.248          | 69.964        | 79.6       | 69        | 80.5                    | 69.2                  |
| Luxembourg                       | 82.9            | 79.9          | 84.218          | 79.978        | 84.7       | 80        | 84.8                    | 79.7                  |
| Madagascar                       | 64.2            | 61.6          | 67.404          | 64.346        | 67.2       | 64.2      | 67.1                    | 64.1                  |
| Malawi                           | 65.4            | 58.2          | 67.822          | 62.278        | 66         | 60.7      | 62.7                    | 58.7                  |
| Malaysia                         | 77.2            | 72.3          | 77.73           | 73.234        | 77.5       | 73        | 77.7                    | 72.0                  |
| Maldives                         | 83.1            | 79.7          | 77.824          | 75.86         | 79.6       | 76.9      | 77.8                    | 73.1                  |
| Mali                             | 62.2            | 60.1          | 58.202          | 56.91         | 57.8       | 56.9      | 57.3                    | 53.5                  |
| Malta                            | 83.0            | 79.3          | 82.52           | 79.078        | 83.2       | 79.6      | 82.7                    | 77.9                  |
| Mauritania                       | 70.3            | 69.5          | 64.818          | 62.048        | 65         | 62.4      | 65.0                    | 60.4                  |
| Mauritius                        | 77.8            | 71.3          | 78.634          | 71.438        | 78         | 71.2      | 79.0                    | 71.9                  |
| Mexico                           | 78.6            | 73.3          | 79.416          | 74.478        | 78.9       | 73.6      | 78.6                    | 72.9                  |
| Mongolia                         | 73.3            | 64.2          | 74.158          | 65.816        | 74         | 65.5      | 73.8                    | 65.0                  |
| Montenegro                       | 78.7            | 74.0          | 80.15           | 75.246        | 79         | 74.1      | 81.6                    | 75.5                  |
| Morocco                          | 74.1            | 72.8          | 76.918          | 75.116        | 76.8       | 74.7      | 79.9                    | 73.6                  |
| Mozambique                       | 59.8            | 52.8          | 59.928          | 55.524        | 60.9       | 56.9      | 53.7                    | 52.2                  |
| Myanmar                          | 71.3            | 64.4          | 69.454          | 64.61         | 68.7       | 64.3      | 68.8                    | 63.9                  |
| Namibia                          | 69.5            | 61.6          | 68.906          | 62.544        | 65.7       | 60.9      | 64.5                    | 61.8                  |
| Nepal                            | 72.1            | 67.3          | 71.836          | 68.568        | 70.5       | 67.5      | 70.5                    | 69.0                  |
| Netherlands                      | 83.2            | 79.7          | 83.704          | 80.17         | 83.1       | 79.7      | 83.5                    | 79.1                  |
| New Zealand                      | 83.2            | 79.8          | 83.59           | 80.238        | 83.7       | 80.3      | 83.2                    | 79.0                  |
| Nicaragua                        | 80.0            | 76.1          | 78.458          | 72.352        | 78.2       | 72.2      | 75.3                    | 70.8                  |
| Niger                            | 62.6            | 60.1          | 61.812          | 59.674        | 60.2       | 58.3      | 56.4                    | 53.9                  |
| Nigeria                          | 64.8            | 61.8          | 53.894          | 52.438        | 55.3       | 54.3      | 54.1                    | 52.0                  |
| Norway                           | 84.1            | 80.4          | 84.11           | 80.268        | 84.1       | 80.5      | 83.8                    | 79.7                  |
| Oman                             | 79.2            | 74.4          | 79.414          | 75.222        | 79.3       | 75.1      | 77.2                    | 73.3                  |
| Pakistan                         | 66.5            | 65.5          | 67.708          | 65.858        | 67         | 65.2      | 69.4                    | 65.5                  |
| Panama                           | 81.7            | 76.4          | 81.138          | 74.838        | 81.1       | 74.9      | 81.4                    | 75.7                  |
| Papua New Guinea                 | 60.7            | 55.7          | 67.924          | 63.094        | 68.1       | 63.4      | 69.4                    | 64.8                  |
| Paraguay                         | 78.5            | 73.2          | 75.52           | 71.3          | 76         | 72.2      | 79.8                    | 74.3                  |
| Peru                             | 81.6            | 78.4          | 77.422          | 72.164        | 78.1       | 73.2      | 75.6                    | 71.5                  |
| Philippines                      | 72.6            | 66.0          | 72.51           | 65.688        | 72.5       | 66.1      | 72.6                    | 65.5                  |
| Poland                           | 81.4            | 73.6          | 81.672          | 73.914        | 81.3       | 73.4      | 81.5                    | 73.5                  |
| Portugal                         | 84.4            | 78.5          | 84.13           | 78.168        | 84.3       | 78.2      | 82.6                    | 75.9                  |
| Qatar                            | 81.2            | 79.2          | 79.792          | 77.396        | 79.7       | 77.1      | 80.7                    | 76.6                  |
| Romania                          | 78.7            | 71.6          | 79.348          | 72.454        | 78.7       | 71.3      | 78.6                    | 71.5                  |
| Rwanda                           | 69.9            | 65.1          | 70.536          | 65.894        | 69.4 67.4  | 65.7 61.9 | 61.3                    | 58.1                  |
| Saint Lucia                      | 78.0            | 73.2          | 78.14           | 72.62         | 78.2       | 72.8      | 80.5                    | 74.9                  |
| Saint Vincent and the Grenadines | 75.1            | 69.3          | 75.446          | 71.196        | 75.1       | 69.7      | 77.1                    | 73.1                  |
| Samoa                            | 74.3            | 71.2          | 78.59           | 72.304        | 78.2       | 71.8      | 76.5                    | 70.6                  |
| Sao Tome and Principe            | 71.3            | 67.6          | 68.694          | 64.35         | 70.5       | 66.6      | 65.9                    | 63.3                  |
| Saudi Arabia                     | 78.9            | 74.5          | 76.12           | 73.212        | 76.3       | 73.3      | 77.2                    | 73.0                  |
| Senegal                          | 69.4            | 65.7          | 69.814          | 65.412        | 68.3       | 64.4      | 63.4                    | 59.3                  |
| Serbia                           | 77.5            | 72.8          | 78.334          | 72.574        | 78.5       | 73.4      | 78.3                    | 72.4                  |
| Seychelles                       | 77.5            | 70.0          | 78.294          | 69.074        | 77.8       | 69        | 79.2                    | 69.9                  |
| Sierra Leone                     | 59.4            | 57.6          | 53.152          | 52.41         | 52         | 50.7      | 60.4                    | 55.2                  |
| Singapore                        | 87.2            | 81.6          | 85.036          | 80.864        | 84.8       | 80.6      | 87.5                    | 82.1                  |
| Slovakia                         | 80.1            | 73.1          | 80.534          | 73.742        | 80.6       | 73.5      | 80.7                    | 73.3                  |
| Slovenia                         | 83.9            | 77.6          | 84.012          | 78.6          | 83.5       | 77.6      | 81.9                    | 74.4                  |
| Solomon Islands                  | 67.2            | 63.8          | 72.508          | 69.556        | 72.4       | 69.5      | 77.9                    | 72.5                  |
| Somalia                          | 60.2            | 56.4          | 57.536          | 54.258        | 57.1       | 54.1      | 54.1                    | 49.9                  |
| South Africa                     | 65.7            | 60.8          | 67.458          | 59.37         | 66.7       | 60        | 63.9                    | 60.8                  |
| South Sudan                      | 61.7            | 57.4          | 57.668          | 55.78         | 59.1       | 57.3      | 62.3                    | 59.3                  |
| Spain                            | 85.4            | 79.8          | 85.908          | 80.572        | 85.4       | 79.9      | 84.8                    | 78.6                  |
| Sri Lanka                        | 80.4            | 73.3          | 78.222          | 71.618        | 78.3       | 72.1      | 80.2                    | 73.1                  |
| Suriname                         | 75.2            | 68.7          | 74.822          | 68.644        | 74.8       | 68.5      | 74.5                    | 69.6                  |
| Swaziland                        | 60.5            | 51.3          | 63.066          | 54.624        | 59.6       | 54.8      | 50.5                    | 51.6                  |
| Sweden                           | 84.1            | 80.3          | 84.142          | 80.6          | 84         | 80.3      | 84.0                    | 80.1                  |
| Switzerland                      | 85.5            | 81.3          | 85.146          | 81.226        | 84.9       | 80.9      | 84.9                    | 80.2                  |
| Tajikistan                       | 73.3            | 67.5          | 74.428          | 68.738        | 72.8       | 68.5      | 70.7                    | 64.3                  |
| Thailand                         | 81.9            | 74.6          | 79.518          | 71.436        | 79.1       | 71.6      | 77.8                    | 71.2                  |
| Timor-Leste                      | 72.8            | 68.8          | 70.638          | 66.606        | 70.1       | 66.6      | 69.4                    | 66.2                  |
| Togo                             | 65.4            | 60.1          | 61.81           | 60.25         | 61.1       | 59.4      | 67.2                    | 61.9                  |
| Tonga                            | 74.9            | 68.4          | 76.076          | 69.882        | 76.2       | 70.4      | 77.6                    | 74.5                  |
| Trinidad and Tobago              | 77.7            | 71.3          | 74.368          | 67.482        | 75.4       | 68.2      | 75.6                    | 69.7                  |
| Tunisia                          | 80.3            | 75.7          | 77.184          | 73.484        | 77.8       | 73.9      | 78.1                    | 73.8                  |
| Turkey                           | 82.4            | 74.6          | 78.846          | 72.496        | 79.2       | 73        | 77.0                    | 72.3                  |
| Turkmenistan                     | 73.4            | 66.3          | 71.462          | 64.88         | 71.3       | 64.2      | 72.9                    | 66.8                  |
| Uganda                           | 68.1            | 61.1          | 63.124          | 58.232        | 64.5       | 59.7      | 56.4                    | 53.5                  |
| Ukraine                          | 75.6            | 63.1          | 77.358          | 68.362        | 76.8       | 67.2      | 76.6                    | 66.8                  |
| United Arab Emirates             | 76.6            | 71.5          | 78.716          | 76.522        | 78.5       | 76.4      | 80.0                    | 74.7                  |
| Uruguay                          | 80.4            | 73.4          | 80.878          | 73.694        | 80.6       | 73        | 80.3                    | 73.9                  |
| Uzbekistan                       | 73.3            | 66.7          | 74.338          | 69.312        | 74.8       | 69.4      | 76.8                    | 70.5                  |
| Vanuatu                          | 67.5            | 61.8          | 74.524          | 70.072        | 73.9       | 69.9      | 74.7                    | 71.5                  |

**Table 5 Life expectancy at birth in 2015 from UN, WHO, census, and GBD 2017**

| Location | GBD 2017 Female | GBD 2017 Male | WPP 2017 Female | WPP 2017 Male | WHO Female | WHO Male | US Census Bureau Female | US Census Bureau Male |
|----------|-----------------|---------------|-----------------|---------------|------------|----------|-------------------------|-----------------------|
| Yemen    | 70.5            | 66.7          | 66.428          | 63.65         | 66.2       | 62.8     | 67.4                    | 63.1                  |
| Zambia   | 64.9            | 59.4          | 66.254          | 61.342        | 63.6       | 59.8     | 53.8                    | 50.5                  |
| Zimbabwe | 62.7            | 56.5          | 64.798          | 61.44         | 62.4       | 59       | 57.6                    | 56.5                  |







Table 6 Estimates of life expectancy at birth by location and year for 1950, 1955, 2005, 2010, 2017 - both sexes

Table with columns for Location, 1950, 1955, 1960, 1965, 1970, 1975, 1980, 1985, 1990, 1995, 2000, 2005, 2010, 2017. Rows list countries and territories such as Brunei Darussalam, Bahrain, Bangladesh, Barbados, Belarus, Belgium, Belize, Benin, Bolivia, Bosnia and Herzegovina, Botswana, Brazil, Bulgaria, Burkina Faso, Burundi, Cambodia, Cameroon, Canada, Central Europe and the Baltics, Chile, China, Colombia, Costa Rica, Czechia, Denmark, Dominican Republic, Ecuador, Egypt, El Salvador, Estonia, Finland, France, Germany, Greece, Guatemala, Guinea-Bissau, Haiti, Honduras, Hungary, Iceland, India, Indonesia, Israel, Italy, Jamaica, Jordan, Kazakhstan, Kenya, Kuwait, Kyrgyzstan, Laos, Latvia, Lebanon, Lithuania, Luxembourg, Madagascar, Malawi, Malaysia, Maldives, Mali, Malta, Mauritius, Mexico, Moldova, Mongolia, Montenegro, Morocco, Mozambique, Myanmar, Nepal, Netherlands, New Zealand, Nicaragua, Nigeria, Norway, Oman, Pakistan, Panama, Paraguay, Peru, Philippines, Poland, Portugal, Romania, Russian Federation, Rwanda, Saudi Arabia, Senegal, Serbia, Singapore, Slovakia, Slovenia, South Africa, South Asia, Sri Lanka, Sudan, Sweden, Switzerland, Taiwan, Tajikistan, Tanzania, Thailand, Timor-Leste, Tunisia, Turkey, Uganda, Ukraine, United Kingdom, United States, Uruguay, Uzbekistan, Venezuela, Viet Nam, Yemen, Zambia, Zimbabwe.





Table 6 Estimates of life expectancy at birth by location and year for 1950, 1955, 2005, 2010, 2017 - both sexes

| Location        | 1950 | 1955 | 1960 | 1965 | 1970 | 1975 | 1980 | 1985 | 1990 | 1995 | 2000 | 2005 | 2010 | 2017 |
|-----------------|------|------|------|------|------|------|------|------|------|------|------|------|------|------|
| Tanzania        | 45.3 | 46.2 | 47.3 | 48.4 | 49.7 | 51.9 | 55.0 | 58.2 | 61.4 | 63.8 | 67.0 | 68.8 | 70.1 | 70.7 |
| Timor-Leste     | 45.3 | 45.3 | 45.3 | 45.3 | 45.3 | 45.3 | 45.3 | 45.3 | 45.3 | 45.3 | 45.3 | 45.3 | 45.3 | 45.3 |
| Togo            | 42.9 | 46   | 46.4 | 46.4 | 46.4 | 46.4 | 46.4 | 46.4 | 46.4 | 46.4 | 46.4 | 46.4 | 46.4 | 46.4 |
| Turkmenistan    | 42.9 | 46   | 46.4 | 46.4 | 46.4 | 46.4 | 46.4 | 46.4 | 46.4 | 46.4 | 46.4 | 46.4 | 46.4 | 46.4 |
| Uganda          | 42.9 | 46   | 46.4 | 46.4 | 46.4 | 46.4 | 46.4 | 46.4 | 46.4 | 46.4 | 46.4 | 46.4 | 46.4 | 46.4 |
| Uzbekistan      | 42.9 | 46   | 46.4 | 46.4 | 46.4 | 46.4 | 46.4 | 46.4 | 46.4 | 46.4 | 46.4 | 46.4 | 46.4 | 46.4 |
| West Bank       | 42.9 | 46   | 46.4 | 46.4 | 46.4 | 46.4 | 46.4 | 46.4 | 46.4 | 46.4 | 46.4 | 46.4 | 46.4 | 46.4 |
| Yemen           | 42.9 | 46   | 46.4 | 46.4 | 46.4 | 46.4 | 46.4 | 46.4 | 46.4 | 46.4 | 46.4 | 46.4 | 46.4 | 46.4 |
| Yemen Arab Rep. | 42.9 | 46   | 46.4 | 46.4 | 46.4 | 46.4 | 46.4 | 46.4 | 46.4 | 46.4 | 46.4 | 46.4 | 46.4 | 46.4 |
| Zambia          | 42.9 | 46   | 46.4 | 46.4 | 46.4 | 46.4 | 46.4 | 46.4 | 46.4 | 46.4 | 46.4 | 46.4 | 46.4 | 46.4 |
| Zimbabwe        | 42.9 | 46   | 46.4 | 46.4 | 46.4 | 46.4 | 46.4 | 46.4 | 46.4 | 46.4 | 46.4 | 46.4 | 46.4 | 46.4 |
| ...             | ...  | ...  | ...  | ...  | ...  | ...  | ...  | ...  | ...  | ...  | ...  | ...  | ...  | ...  |
| Zimbabwe        | 42.9 | 46   | 46.4 | 46.4 | 46.4 | 46.4 | 46.4 | 46.4 | 46.4 | 46.4 | 46.4 | 46.4 | 46.4 | 46.4 |









Table 7 Estimates of life expectancy at birth by location and year for 1950, 1955, 2005, 2010, 2017 - females

| Location       | 1950 | 1955 | 1960 | 1965 | 1970 | 1975 | 1980 | 1985 | 1990 | 1995 | 2000 | 2005  | 2010  | 2017  |
|----------------|------|------|------|------|------|------|------|------|------|------|------|-------|-------|-------|
| Buenos Aires   | 72.4 | 75.4 | 78.9 | 81.4 | 83.3 | 85.3 | 87.3 | 89.4 | 91.5 | 93.5 | 95.6 | 97.7  | 99.8  | 101.9 |
| Brazil         | 65.1 | 67.3 | 69.8 | 72.4 | 75.1 | 77.8 | 80.5 | 83.2 | 85.9 | 88.6 | 91.3 | 94.0  | 96.7  | 99.4  |
| Canada         | 72.2 | 73.9 | 75.9 | 78.4 | 80.9 | 83.4 | 85.9 | 88.4 | 90.9 | 93.4 | 95.9 | 98.4  | 100.9 | 103.4 |
| Chile          | 68.2 | 71.1 | 73.8 | 76.5 | 79.2 | 81.9 | 84.6 | 87.3 | 90.0 | 92.7 | 95.4 | 98.1  | 100.8 | 103.5 |
| Denmark        | 72.4 | 75.4 | 78.4 | 81.4 | 83.9 | 86.4 | 88.9 | 91.4 | 93.9 | 96.4 | 98.9 | 101.4 | 103.9 | 106.4 |
| France         | 69.4 | 71.4 | 73.4 | 75.4 | 77.9 | 80.4 | 82.9 | 85.4 | 87.9 | 90.4 | 92.9 | 95.4  | 97.9  | 100.4 |
| Germany        | 70.4 | 72.4 | 74.4 | 76.4 | 78.4 | 80.4 | 82.4 | 84.4 | 86.4 | 88.4 | 90.4 | 92.4  | 94.4  | 96.4  |
| Greece         | 67.4 | 69.4 | 71.4 | 73.4 | 75.4 | 77.4 | 79.4 | 81.4 | 83.4 | 85.4 | 87.4 | 89.4  | 91.4  | 93.4  |
| India          | 52.4 | 54.4 | 56.4 | 58.4 | 60.4 | 62.4 | 64.4 | 66.4 | 68.4 | 70.4 | 72.4 | 74.4  | 76.4  | 78.4  |
| Indonesia      | 53.4 | 55.4 | 57.4 | 59.4 | 61.4 | 63.4 | 65.4 | 67.4 | 69.4 | 71.4 | 73.4 | 75.4  | 77.4  | 79.4  |
| Italy          | 70.4 | 72.4 | 74.4 | 76.4 | 78.4 | 80.4 | 82.4 | 84.4 | 86.4 | 88.4 | 90.4 | 92.4  | 94.4  | 96.4  |
| Japan          | 73.4 | 75.4 | 77.4 | 79.4 | 81.4 | 83.4 | 85.4 | 87.4 | 89.4 | 91.4 | 93.4 | 95.4  | 97.4  | 99.4  |
| South Korea    | 54.4 | 56.4 | 58.4 | 60.4 | 62.4 | 64.4 | 66.4 | 68.4 | 70.4 | 72.4 | 74.4 | 76.4  | 78.4  | 80.4  |
| Russia         | 64.4 | 66.4 | 68.4 | 70.4 | 72.4 | 74.4 | 76.4 | 78.4 | 80.4 | 82.4 | 84.4 | 86.4  | 88.4  | 90.4  |
| Spain          | 67.4 | 69.4 | 71.4 | 73.4 | 75.4 | 77.4 | 79.4 | 81.4 | 83.4 | 85.4 | 87.4 | 89.4  | 91.4  | 93.4  |
| Sweden         | 71.4 | 73.4 | 75.4 | 77.4 | 79.4 | 81.4 | 83.4 | 85.4 | 87.4 | 89.4 | 91.4 | 93.4  | 95.4  | 97.4  |
| Switzerland    | 72.4 | 74.4 | 76.4 | 78.4 | 80.4 | 82.4 | 84.4 | 86.4 | 88.4 | 90.4 | 92.4 | 94.4  | 96.4  | 98.4  |
| Taiwan         | 58.4 | 60.4 | 62.4 | 64.4 | 66.4 | 68.4 | 70.4 | 72.4 | 74.4 | 76.4 | 78.4 | 80.4  | 82.4  | 84.4  |
| United Kingdom | 71.4 | 73.4 | 75.4 | 77.4 | 79.4 | 81.4 | 83.4 | 85.4 | 87.4 | 89.4 | 91.4 | 93.4  | 95.4  | 97.4  |
| USA            | 72.4 | 74.4 | 76.4 | 78.4 | 80.4 | 82.4 | 84.4 | 86.4 | 88.4 | 90.4 | 92.4 | 94.4  | 96.4  | 98.4  |
| Venezuela      | 64.4 | 66.4 | 68.4 | 70.4 | 72.4 | 74.4 | 76.4 | 78.4 | 80.4 | 82.4 | 84.4 | 86.4  | 88.4  | 90.4  |
| Yemen          | 48.4 | 50.4 | 52.4 | 54.4 | 56.4 | 58.4 | 60.4 | 62.4 | 64.4 | 66.4 | 68.4 | 70.4  | 72.4  | 74.4  |



Table 7 Estimates of life expectancy at birth by location and year for 1950, 1955, 2005, 2010, 2017 - females

| Location   | 1950 | 1955 | 1960 | 1965 | 1970 | 1975 | 1980 | 1985 | 1990 | 1995 | 2000 | 2005 | 2010 | 2017 |
|------------|------|------|------|------|------|------|------|------|------|------|------|------|------|------|
| Tanzania   | 41.7 | 47.8 | 47.7 | 47.8 | 47.8 | 47.8 | 47.8 | 47.8 | 47.8 | 47.8 | 47.8 | 47.8 | 47.8 | 47.8 |
| Togo       | 41.6 | 46.4 | 46.4 | 46.4 | 46.4 | 46.4 | 46.4 | 46.4 | 46.4 | 46.4 | 46.4 | 46.4 | 46.4 | 46.4 |
| Tonga      | 41.6 | 46.4 | 46.4 | 46.4 | 46.4 | 46.4 | 46.4 | 46.4 | 46.4 | 46.4 | 46.4 | 46.4 | 46.4 | 46.4 |
| Turkey     | 41.6 | 46.4 | 46.4 | 46.4 | 46.4 | 46.4 | 46.4 | 46.4 | 46.4 | 46.4 | 46.4 | 46.4 | 46.4 | 46.4 |
| Uganda     | 41.6 | 46.4 | 46.4 | 46.4 | 46.4 | 46.4 | 46.4 | 46.4 | 46.4 | 46.4 | 46.4 | 46.4 | 46.4 | 46.4 |
| Uzbekistan | 41.6 | 46.4 | 46.4 | 46.4 | 46.4 | 46.4 | 46.4 | 46.4 | 46.4 | 46.4 | 46.4 | 46.4 | 46.4 | 46.4 |
| Vietnam    | 41.6 | 46.4 | 46.4 | 46.4 | 46.4 | 46.4 | 46.4 | 46.4 | 46.4 | 46.4 | 46.4 | 46.4 | 46.4 | 46.4 |
| Yemen      | 41.6 | 46.4 | 46.4 | 46.4 | 46.4 | 46.4 | 46.4 | 46.4 | 46.4 | 46.4 | 46.4 | 46.4 | 46.4 | 46.4 |
| Zambia     | 41.6 | 46.4 | 46.4 | 46.4 | 46.4 | 46.4 | 46.4 | 46.4 | 46.4 | 46.4 | 46.4 | 46.4 | 46.4 | 46.4 |
| Zimbabwe   | 41.6 | 46.4 | 46.4 | 46.4 | 46.4 | 46.4 | 46.4 | 46.4 | 46.4 | 46.4 | 46.4 | 46.4 | 46.4 | 46.4 |
| World      | 41.6 | 46.4 | 46.4 | 46.4 | 46.4 | 46.4 | 46.4 | 46.4 | 46.4 | 46.4 | 46.4 | 46.4 | 46.4 | 46.4 |



Table 7 Estimates of life expectancy at birth by location and year for 1950, 1955, 2005, 2010, 2017 - females

| Location              | 1950                     | 1955                     | 1960                     | 1965                     | 1970                | 1975                | 1980                | 1985                | 1990                | 1995                | 2000                | 2005                | 2010                | 2017                |                     |
|-----------------------|--------------------------|--------------------------|--------------------------|--------------------------|---------------------|---------------------|---------------------|---------------------|---------------------|---------------------|---------------------|---------------------|---------------------|---------------------|---------------------|
| Turkmen               | 61.3<br>(57.1-65.5)      | 60.7<br>(56.4-65.0)      | 62.4<br>(58.1-66.7)      | 62.4<br>(58.1-66.7)      | 60.9<br>(56.6-65.2) | 59.2<br>(54.9-63.5) | 57.4<br>(53.1-61.7) | 56.2<br>(51.9-60.5) | 55.4<br>(51.1-60.1) | 54.9<br>(50.6-59.2) | 54.5<br>(50.2-58.8) | 54.1<br>(49.8-58.4) | 53.7<br>(49.4-57.9) | 53.6<br>(49.3-58.0) | 53.5<br>(49.2-57.8) |
| Union Group           | 63.6<br>(59.4-67.8)      | 63.6<br>(59.4-67.8)      | 65.3<br>(61.1-69.5)      | 65.6<br>(61.4-70.0)      | 65.8<br>(61.6-70.2) | 65.8<br>(61.6-70.2) | 66.1<br>(61.9-70.5) | 66.4<br>(62.2-70.8) | 66.1<br>(61.9-70.5) | 66.9<br>(62.7-71.3) | 67.9<br>(63.7-72.5) | 68.9<br>(64.7-74.1) | 69.9<br>(65.7-75.3) | 70.9<br>(66.7-76.5) | 72.3<br>(68.1-76.5) |
| Vietnam               | 55<br>(51.4-58.6)        | 55.8<br>(52.2-59.4)      | 57.5<br>(53.9-61.1)      | 58.5<br>(54.9-62.1)      | 60.1<br>(56.5-63.7) | 61.1<br>(57.5-64.7) | 61.3<br>(57.7-65.1) | 61.5<br>(57.9-64.9) | 61.5<br>(57.9-64.9) | 60.5<br>(56.9-64.1) | 57.3<br>(53.7-60.9) | 52.6<br>(49.0-56.2) | 50.3<br>(46.7-53.9) | 49.3<br>(45.9-52.7) | 48.4<br>(45.0-51.8) |
| Yajir                 | 52.6-60<br>(48.2-57.0)   | 52.3-58.5<br>(47.9-54.7) | 54.4-62.5<br>(50.0-57.2) | 55.4-63.6<br>(51.0-58.2) | 56.9<br>(52.5-61.3) | 57.9<br>(53.5-62.5) | 58.7<br>(54.3-63.7) | 59.5<br>(55.1-64.5) | 60.2<br>(55.8-65.6) | 60.6<br>(56.2-66.0) | 61.0<br>(56.6-66.4) | 61.4<br>(57.0-67.8) | 61.8<br>(57.4-68.2) | 62.2<br>(57.8-68.6) | 62.6<br>(58.2-69.0) |
| West Point            | 52.1-60.6<br>(47.7-56.5) | 52.3-60.8<br>(47.9-56.7) | 54.4-62.5<br>(50.0-57.2) | 55.4-63.6<br>(51.0-58.2) | 56.9<br>(52.5-61.3) | 57.9<br>(53.5-62.5) | 58.7<br>(54.3-63.7) | 59.5<br>(55.1-64.5) | 60.2<br>(55.8-65.6) | 60.6<br>(56.2-66.0) | 61.0<br>(56.6-66.4) | 61.4<br>(57.0-67.8) | 61.8<br>(57.4-68.2) | 62.2<br>(57.8-68.6) | 62.6<br>(58.2-69.0) |
| Maldives              | 48.3<br>(44.7-51.9)      | 48.9<br>(45.3-52.5)      | 49.9<br>(46.3-53.7)      | 50.9<br>(47.3-54.5)      | 51.9<br>(48.3-55.5) | 52.9<br>(49.3-57.3) | 53.9<br>(50.3-59.3) | 54.9<br>(51.3-60.3) | 55.9<br>(52.3-61.3) | 56.9<br>(53.3-62.3) | 57.9<br>(54.3-63.3) | 58.9<br>(55.3-64.3) | 59.9<br>(56.3-65.3) | 60.9<br>(57.3-66.3) | 61.9<br>(58.3-67.3) |
| Mali                  | 48.9<br>(44.8-52.9)      | 49.5<br>(45.4-53.6)      | 50.5<br>(46.4-54.6)      | 51.5<br>(47.4-55.5)      | 52.5<br>(48.4-56.5) | 53.5<br>(49.4-57.5) | 54.5<br>(50.4-59.5) | 55.5<br>(51.4-60.5) | 56.5<br>(52.4-61.5) | 57.5<br>(53.4-62.5) | 58.5<br>(54.4-63.5) | 59.5<br>(55.4-64.5) | 60.5<br>(56.4-65.5) | 61.5<br>(57.4-66.5) | 62.5<br>(58.4-67.5) |
| Morocco               | 50.8<br>(46.7-54.9)      | 51.4<br>(47.3-55.5)      | 52.4<br>(48.3-56.5)      | 53.4<br>(49.3-57.5)      | 54.4<br>(50.3-59.5) | 55.4<br>(51.3-60.5) | 56.4<br>(52.3-61.5) | 57.4<br>(53.3-62.5) | 58.4<br>(54.3-63.5) | 59.4<br>(55.3-64.5) | 60.4<br>(56.3-65.5) | 61.4<br>(57.3-66.5) | 62.4<br>(58.3-67.5) | 63.4<br>(59.3-68.5) | 64.4<br>(60.3-69.5) |
| Niger                 | 48.3<br>(44.2-52.4)      | 48.9<br>(44.8-52.9)      | 49.9<br>(45.4-54.6)      | 50.9<br>(46.5-55.7)      | 51.9<br>(47.5-56.7) | 52.9<br>(48.5-57.7) | 53.9<br>(49.5-58.7) | 54.9<br>(50.5-59.7) | 55.9<br>(51.5-60.7) | 56.9<br>(52.5-61.7) | 57.9<br>(53.5-62.7) | 58.9<br>(54.5-63.7) | 59.9<br>(55.5-64.7) | 60.9<br>(56.5-65.7) | 61.9<br>(57.5-66.7) |
| Nigeria               | 49.1<br>(45.0-53.2)      | 49.7<br>(45.6-53.8)      | 50.7<br>(46.6-54.9)      | 51.7<br>(47.6-55.9)      | 52.7<br>(48.6-56.9) | 53.7<br>(49.6-57.9) | 54.7<br>(50.6-58.9) | 55.7<br>(51.6-60.1) | 56.7<br>(52.6-60.9) | 57.7<br>(53.6-62.3) | 58.7<br>(54.6-63.5) | 59.7<br>(55.6-64.5) | 60.7<br>(56.6-65.5) | 61.7<br>(57.6-66.5) | 62.7<br>(58.6-67.5) |
| San Tome and Principe | 49.1<br>(45.0-53.2)      | 49.7<br>(45.6-53.8)      | 50.7<br>(46.6-54.9)      | 51.7<br>(47.6-55.9)      | 52.7<br>(48.6-56.9) | 53.7<br>(49.6-57.9) | 54.7<br>(50.6-58.9) | 55.7<br>(51.6-60.1) | 56.7<br>(52.6-60.9) | 57.7<br>(53.6-62.3) | 58.7<br>(54.6-63.5) | 59.7<br>(55.6-64.5) | 60.7<br>(56.6-65.5) | 61.7<br>(57.6-66.5) | 62.7<br>(58.6-67.5) |
| Senegal               | 49.1<br>(45.0-53.2)      | 49.7<br>(45.6-53.8)      | 50.7<br>(46.6-54.9)      | 51.7<br>(47.6-55.9)      | 52.7<br>(48.6-56.9) | 53.7<br>(49.6-57.9) | 54.7<br>(50.6-58.9) | 55.7<br>(51.6-60.1) | 56.7<br>(52.6-60.9) | 57.7<br>(53.6-62.3) | 58.7<br>(54.6-63.5) | 59.7<br>(55.6-64.5) | 60.7<br>(56.6-65.5) | 61.7<br>(57.6-66.5) | 62.7<br>(58.6-67.5) |
| Sierra Leone          | 49.1<br>(45.0-53.2)      | 49.7<br>(45.6-53.8)      | 50.7<br>(46.6-54.9)      | 51.7<br>(47.6-55.9)      | 52.7<br>(48.6-56.9) | 53.7<br>(49.6-57.9) | 54.7<br>(50.6-58.9) | 55.7<br>(51.6-60.1) | 56.7<br>(52.6-60.9) | 57.7<br>(53.6-62.3) | 58.7<br>(54.6-63.5) | 59.7<br>(55.6-64.5) | 60.7<br>(56.6-65.5) | 61.7<br>(57.6-66.5) | 62.7<br>(58.6-67.5) |
| Togo                  | 49.1<br>(45.0-53.2)      | 49.7<br>(45.6-53.8)      | 50.7<br>(46.6-54.9)      | 51.7<br>(47.6-55.9)      | 52.7<br>(48.6-56.9) | 53.7<br>(49.6-57.9) | 54.7<br>(50.6-58.9) | 55.7<br>(51.6-60.1) | 56.7<br>(52.6-60.9) | 57.7<br>(53.6-62.3) | 58.7<br>(54.6-63.5) | 59.7<br>(55.6-64.5) | 60.7<br>(56.6-65.5) | 61.7<br>(57.6-66.5) | 62.7<br>(58.6-67.5) |

**Table 8 Estimates of life expectancy at birth by location and year for 1950, 1955, 2005, 2010, 2017 - males**

| Location                                       | 1950 | 1955 | 1960 | 1965 | 1970 | 1975 | 1980 | 1985 | 1990  | 1995  | 2000  | 2005  | 2010  | 2017  |
|------------------------------------------------|------|------|------|------|------|------|------|------|-------|-------|-------|-------|-------|-------|
| Global                                         | 48.1 | 51.1 | 54.3 | 57.6 | 60.9 | 64.2 | 67.5 | 70.8 | 74.1  | 77.4  | 80.7  | 84.0  | 87.3  | 90.6  |
| Low SDI                                        | 46.8 | 49.8 | 53.0 | 56.2 | 59.4 | 62.6 | 65.8 | 69.0 | 72.2  | 75.4  | 78.6  | 81.8  | 85.0  | 88.2  |
| Low-middle SDI                                 | 41.1 | 43.4 | 45.6 | 47.8 | 49.9 | 51.9 | 53.9 | 55.9 | 57.9  | 59.8  | 61.7  | 63.6  | 65.5  | 67.4  |
| High SDI                                       | 53.8 | 56.4 | 59.0 | 61.6 | 64.2 | 66.8 | 69.4 | 72.0 | 74.6  | 77.2  | 79.8  | 82.4  | 85.0  | 87.6  |
| Central Asia, Eastern Europe, and Central Asia | 47.8 | 50.8 | 53.8 | 56.8 | 59.8 | 62.8 | 65.8 | 68.8 | 71.8  | 74.8  | 77.8  | 80.8  | 83.8  | 86.8  |
| Armenia                                        | 47.8 | 50.8 | 53.8 | 56.8 | 59.8 | 62.8 | 65.8 | 68.8 | 71.8  | 74.8  | 77.8  | 80.8  | 83.8  | 86.8  |
| Azerbaijan                                     | 47.8 | 50.8 | 53.8 | 56.8 | 59.8 | 62.8 | 65.8 | 68.8 | 71.8  | 74.8  | 77.8  | 80.8  | 83.8  | 86.8  |
| Georgia                                        | 47.8 | 50.8 | 53.8 | 56.8 | 59.8 | 62.8 | 65.8 | 68.8 | 71.8  | 74.8  | 77.8  | 80.8  | 83.8  | 86.8  |
| Kazakhstan                                     | 47.8 | 50.8 | 53.8 | 56.8 | 59.8 | 62.8 | 65.8 | 68.8 | 71.8  | 74.8  | 77.8  | 80.8  | 83.8  | 86.8  |
| Kyrgyzstan                                     | 47.8 | 50.8 | 53.8 | 56.8 | 59.8 | 62.8 | 65.8 | 68.8 | 71.8  | 74.8  | 77.8  | 80.8  | 83.8  | 86.8  |
| Tajikistan                                     | 47.8 | 50.8 | 53.8 | 56.8 | 59.8 | 62.8 | 65.8 | 68.8 | 71.8  | 74.8  | 77.8  | 80.8  | 83.8  | 86.8  |
| Turkmenistan                                   | 47.8 | 50.8 | 53.8 | 56.8 | 59.8 | 62.8 | 65.8 | 68.8 | 71.8  | 74.8  | 77.8  | 80.8  | 83.8  | 86.8  |
| Uzbekistan                                     | 47.8 | 50.8 | 53.8 | 56.8 | 59.8 | 62.8 | 65.8 | 68.8 | 71.8  | 74.8  | 77.8  | 80.8  | 83.8  | 86.8  |
| Central Europe                                 | 47.8 | 50.8 | 53.8 | 56.8 | 59.8 | 62.8 | 65.8 | 68.8 | 71.8  | 74.8  | 77.8  | 80.8  | 83.8  | 86.8  |
| Albania                                        | 47.8 | 50.8 | 53.8 | 56.8 | 59.8 | 62.8 | 65.8 | 68.8 | 71.8  | 74.8  | 77.8  | 80.8  | 83.8  | 86.8  |
| Bosnia and Herzegovina                         | 47.8 | 50.8 | 53.8 | 56.8 | 59.8 | 62.8 | 65.8 | 68.8 | 71.8  | 74.8  | 77.8  | 80.8  | 83.8  | 86.8  |
| Bulgaria                                       | 47.8 | 50.8 | 53.8 | 56.8 | 59.8 | 62.8 | 65.8 | 68.8 | 71.8  | 74.8  | 77.8  | 80.8  | 83.8  | 86.8  |
| Croatia                                        | 47.8 | 50.8 | 53.8 | 56.8 | 59.8 | 62.8 | 65.8 | 68.8 | 71.8  | 74.8  | 77.8  | 80.8  | 83.8  | 86.8  |
| Czech Republic                                 | 47.8 | 50.8 | 53.8 | 56.8 | 59.8 | 62.8 | 65.8 | 68.8 | 71.8  | 74.8  | 77.8  | 80.8  | 83.8  | 86.8  |
| Hungary                                        | 47.8 | 50.8 | 53.8 | 56.8 | 59.8 | 62.8 | 65.8 | 68.8 | 71.8  | 74.8  | 77.8  | 80.8  | 83.8  | 86.8  |
| Poland                                         | 47.8 | 50.8 | 53.8 | 56.8 | 59.8 | 62.8 | 65.8 | 68.8 | 71.8  | 74.8  | 77.8  | 80.8  | 83.8  | 86.8  |
| Romania                                        | 47.8 | 50.8 | 53.8 | 56.8 | 59.8 | 62.8 | 65.8 | 68.8 | 71.8  | 74.8  | 77.8  | 80.8  | 83.8  | 86.8  |
| Serbia                                         | 47.8 | 50.8 | 53.8 | 56.8 | 59.8 | 62.8 | 65.8 | 68.8 | 71.8  | 74.8  | 77.8  | 80.8  | 83.8  | 86.8  |
| Slovakia                                       | 47.8 | 50.8 | 53.8 | 56.8 | 59.8 | 62.8 | 65.8 | 68.8 | 71.8  | 74.8  | 77.8  | 80.8  | 83.8  | 86.8  |
| Slovenia                                       | 47.8 | 50.8 | 53.8 | 56.8 | 59.8 | 62.8 | 65.8 | 68.8 | 71.8  | 74.8  | 77.8  | 80.8  | 83.8  | 86.8  |
| Eastern Europe                                 | 47.8 | 50.8 | 53.8 | 56.8 | 59.8 | 62.8 | 65.8 | 68.8 | 71.8  | 74.8  | 77.8  | 80.8  | 83.8  | 86.8  |
| Belarus                                        | 47.8 | 50.8 | 53.8 | 56.8 | 59.8 | 62.8 | 65.8 | 68.8 | 71.8  | 74.8  | 77.8  | 80.8  | 83.8  | 86.8  |
| Estonia                                        | 47.8 | 50.8 | 53.8 | 56.8 | 59.8 | 62.8 | 65.8 | 68.8 | 71.8  | 74.8  | 77.8  | 80.8  | 83.8  | 86.8  |
| Latvia                                         | 47.8 | 50.8 | 53.8 | 56.8 | 59.8 | 62.8 | 65.8 | 68.8 | 71.8  | 74.8  | 77.8  | 80.8  | 83.8  | 86.8  |
| Lithuania                                      | 47.8 | 50.8 | 53.8 | 56.8 | 59.8 | 62.8 | 65.8 | 68.8 | 71.8  | 74.8  | 77.8  | 80.8  | 83.8  | 86.8  |
| Moldova                                        | 47.8 | 50.8 | 53.8 | 56.8 | 59.8 | 62.8 | 65.8 | 68.8 | 71.8  | 74.8  | 77.8  | 80.8  | 83.8  | 86.8  |
| Russia Federation                              | 47.8 | 50.8 | 53.8 | 56.8 | 59.8 | 62.8 | 65.8 | 68.8 | 71.8  | 74.8  | 77.8  | 80.8  | 83.8  | 86.8  |
| Ukraine                                        | 47.8 | 50.8 | 53.8 | 56.8 | 59.8 | 62.8 | 65.8 | 68.8 | 71.8  | 74.8  | 77.8  | 80.8  | 83.8  | 86.8  |
| High-income                                    | 78.8 | 81.8 | 84.8 | 87.8 | 90.8 | 93.8 | 96.8 | 99.8 | 102.8 | 105.8 | 108.8 | 111.8 | 114.8 | 117.8 |
| Australia                                      | 78.8 | 81.8 | 84.8 | 87.8 | 90.8 | 93.8 | 96.8 | 99.8 | 102.8 | 105.8 | 108.8 | 111.8 | 114.8 | 117.8 |
| Canada                                         | 78.8 | 81.8 | 84.8 | 87.8 | 90.8 | 93.8 | 96.8 | 99.8 | 102.8 | 105.8 | 108.8 | 111.8 | 114.8 | 117.8 |
| France                                         | 78.8 | 81.8 | 84.8 | 87.8 | 90.8 | 93.8 | 96.8 | 99.8 | 102.8 | 105.8 | 108.8 | 111.8 | 114.8 | 117.8 |
| Germany                                        | 78.8 | 81.8 | 84.8 | 87.8 | 90.8 | 93.8 | 96.8 | 99.8 | 102.8 | 105.8 | 108.8 | 111.8 | 114.8 | 117.8 |
| Italy                                          | 78.8 | 81.8 | 84.8 | 87.8 | 90.8 | 93.8 | 96.8 | 99.8 | 102.8 | 105.8 | 108.8 | 111.8 | 114.8 | 117.8 |
| Japan                                          | 78.8 | 81.8 | 84.8 | 87.8 | 90.8 | 93.8 | 96.8 | 99.8 | 102.8 | 105.8 | 108.8 | 111.8 | 114.8 | 117.8 |
| South Korea                                    | 78.8 | 81.8 | 84.8 | 87.8 | 90.8 | 93.8 | 96.8 | 99.8 | 102.8 | 105.8 | 108.8 | 111.8 | 114.8 | 117.8 |
| Spain                                          | 78.8 | 81.8 | 84.8 | 87.8 | 90.8 | 93.8 | 96.8 | 99.8 | 102.8 | 105.8 | 108.8 | 111.8 | 114.8 | 117.8 |
| Sweden                                         | 78.8 | 81.8 | 84.8 | 87.8 | 90.8 | 93.8 | 96.8 | 99.8 | 102.8 | 105.8 | 108.8 | 111.8 | 114.8 | 117.8 |
| Switzerland                                    | 78.8 | 81.8 | 84.8 | 87.8 | 90.8 | 93.8 | 96.8 | 99.8 | 102.8 | 105.8 | 108.8 | 111.8 | 114.8 | 117.8 |
| United Kingdom                                 | 78.8 | 81.8 | 84.8 | 87.8 | 90.8 | 93.8 | 96.8 | 99.8 | 102.8 | 105.8 | 108.8 | 111.8 | 114.8 | 117.8 |
| United States                                  | 78.8 | 81.8 | 84.8 | 87.8 | 90.8 | 93.8 | 96.8 | 99.8 | 102.8 | 105.8 | 108.8 | 111.8 | 114.8 | 117.8 |







**Table 8 Estimates of life expectancy at birth by location and year for 1950, 1955, 2005, 2010, 2017 - males**

| Location            | 1950        | 1955        | 1960        | 1965        | 1970        | 1975        | 1980        | 1985        | 1990        | 1995        | 2000        | 2005        | 2010        | 2017        |
|---------------------|-------------|-------------|-------------|-------------|-------------|-------------|-------------|-------------|-------------|-------------|-------------|-------------|-------------|-------------|
| Algeria             | 46.5        | 47.5        | 48.5        | 49.5        | 50.5        | 51.5        | 52.5        | 53.5        | 54.5        | 55.5        | 56.5        | 57.5        | 58.5        | 59.5        |
| Algeria (38.2-44.1) | (41.3-45.1) | (42.3-46.1) | (43.3-47.1) | (44.3-48.1) | (45.3-49.1) | (46.3-50.1) | (47.3-51.1) | (48.3-52.1) | (49.3-53.1) | (50.3-54.1) | (51.3-55.1) | (52.3-56.1) | (53.3-57.1) | (54.3-58.1) |
| Algeria             | 46.5        | 47.5        | 48.5        | 49.5        | 50.5        | 51.5        | 52.5        | 53.5        | 54.5        | 55.5        | 56.5        | 57.5        | 58.5        | 59.5        |
| Algeria (38.2-44.1) | (41.3-45.1) | (42.3-46.1) | (43.3-47.1) | (44.3-48.1) | (45.3-49.1) | (46.3-50.1) | (47.3-51.1) | (48.3-52.1) | (49.3-53.1) | (50.3-54.1) | (51.3-55.1) | (52.3-56.1) | (53.3-57.1) | (54.3-58.1) |
| Algeria             | 46.5        | 47.5        | 48.5        | 49.5        | 50.5        | 51.5        | 52.5        | 53.5        | 54.5        | 55.5        | 56.5        | 57.5        | 58.5        | 59.5        |
| Algeria (38.2-44.1) | (41.3-45.1) | (42.3-46.1) | (43.3-47.1) | (44.3-48.1) | (45.3-49.1) | (46.3-50.1) | (47.3-51.1) | (48.3-52.1) | (49.3-53.1) | (50.3-54.1) | (51.3-55.1) | (52.3-56.1) | (53.3-57.1) | (54.3-58.1) |













**Table 9** Estimates of life expectancy at age 65 by location and year for 1950, 1955, 2005, 2010, 2017 - both sexes

| Location     | 1950        | 1955        | 1960        | 1965        | 1970        | 1975        | 1980        | 1985        | 1990        | 1995        | 2000        | 2005        | 2010        | 2017        |
|--------------|-------------|-------------|-------------|-------------|-------------|-------------|-------------|-------------|-------------|-------------|-------------|-------------|-------------|-------------|
| Buenos Aires | 12.8        | 14.2        | 14.6        | 14.8        | 15.2        | 16.1        | 16.7        | 16.9        | 16.9        | 16.7        | 16.7        | 16.7        | 16.8        | 16.8        |
| Buenos Aires | (12.8-15.2) | (12.8-15.2) | (12.8-15.2) | (12.8-15.2) | (12.8-15.2) | (12.8-15.2) | (12.8-15.2) | (12.8-15.2) | (12.8-15.2) | (12.8-15.2) | (12.8-15.2) | (12.8-15.2) | (12.8-15.2) | (12.8-15.2) |
| Buenos Aires | 12.8        | 14.2        | 14.6        | 14.8        | 15.2        | 16.1        | 16.7        | 16.9        | 16.9        | 16.7        | 16.7        | 16.7        | 16.8        | 16.8        |
| Buenos Aires | (12.8-15.2) | (12.8-15.2) | (12.8-15.2) | (12.8-15.2) | (12.8-15.2) | (12.8-15.2) | (12.8-15.2) | (12.8-15.2) | (12.8-15.2) | (12.8-15.2) | (12.8-15.2) | (12.8-15.2) | (12.8-15.2) | (12.8-15.2) |
| Buenos Aires | 12.8        | 14.2        | 14.6        | 14.8        | 15.2        | 16.1        | 16.7        | 16.9        | 16.9        | 16.7        | 16.7        | 16.7        | 16.8        | 16.8        |
| Buenos Aires | (12.8-15.2) | (12.8-15.2) | (12.8-15.2) | (12.8-15.2) | (12.8-15.2) | (12.8-15.2) | (12.8-15.2) | (12.8-15.2) | (12.8-15.2) | (12.8-15.2) | (12.8-15.2) | (12.8-15.2) | (12.8-15.2) | (12.8-15.2) |



| Table 9 Estimates of life expectancy at age 65 by location and year for 1950, 1955, 2005, 2010, 2017 - both sexes |      |      |      |      |      |      |      |      |      |      |      |      |      |      |
|-------------------------------------------------------------------------------------------------------------------|------|------|------|------|------|------|------|------|------|------|------|------|------|------|
| Location                                                                                                          | 1950 | 1955 | 1960 | 1965 | 1970 | 1975 | 1980 | 1985 | 1990 | 1995 | 2000 | 2005 | 2010 | 2017 |
| Tanzania                                                                                                          | 49.1 | 50.9 | 52.6 | 54.2 | 55.9 | 57.5 | 59.1 | 60.7 | 62.3 | 63.9 | 65.5 | 67.1 | 68.7 | 70.3 |
| Togo                                                                                                              | 48.3 | 49.9 | 51.5 | 53.1 | 54.7 | 56.3 | 57.9 | 59.5 | 61.1 | 62.7 | 64.3 | 65.9 | 67.5 | 69.1 |
| Tonga                                                                                                             | 50.2 | 50.9 | 51.6 | 52.3 | 53.0 | 53.7 | 54.4 | 55.1 | 55.8 | 56.5 | 57.2 | 57.9 | 58.6 | 59.3 |
| Turkey                                                                                                            | 68.5 | 70.3 | 72.1 | 73.9 | 75.7 | 77.5 | 79.3 | 81.1 | 82.9 | 84.7 | 86.5 | 88.3 | 90.1 | 91.9 |
| Uganda                                                                                                            | 45.8 | 47.6 | 49.4 | 51.2 | 53.0 | 54.8 | 56.6 | 58.4 | 60.2 | 62.0 | 63.8 | 65.6 | 67.4 | 69.2 |
| United States                                                                                                     | 75.8 | 76.2 | 76.6 | 77.0 | 77.4 | 77.8 | 78.2 | 78.6 | 79.0 | 79.4 | 79.8 | 80.2 | 80.6 | 81.0 |
| Uruguay                                                                                                           | 73.5 | 75.3 | 77.1 | 78.9 | 80.7 | 82.5 | 84.3 | 86.1 | 87.9 | 89.7 | 91.5 | 93.3 | 95.1 | 96.9 |
| Vanuatu                                                                                                           | 47.5 | 49.3 | 51.1 | 52.9 | 54.7 | 56.5 | 58.3 | 60.1 | 61.9 | 63.7 | 65.5 | 67.3 | 69.1 | 70.9 |
| Venezuela                                                                                                         | 72.8 | 74.6 | 76.4 | 78.2 | 80.0 | 81.8 | 83.6 | 85.4 | 87.2 | 89.0 | 90.8 | 92.6 | 94.4 | 96.2 |
| Yemen                                                                                                             | 43.2 | 44.9 | 46.6 | 48.3 | 50.0 | 51.7 | 53.4 | 55.1 | 56.8 | 58.5 | 60.2 | 61.9 | 63.6 | 65.3 |
| Zambia                                                                                                            | 44.8 | 46.5 | 48.2 | 49.9 | 51.6 | 53.3 | 55.0 | 56.7 | 58.4 | 60.1 | 61.8 | 63.5 | 65.2 | 66.9 |
| Zimbabwe                                                                                                          | 46.2 | 47.9 | 49.6 | 51.3 | 53.0 | 54.7 | 56.4 | 58.1 | 59.8 | 61.5 | 63.2 | 64.9 | 66.6 | 68.3 |









Table 10 Estimates of life expectancy at age 65 by location and year for 1950, 1955, 2005, 2010, 2017 - females

| Location              | 1950 | 1955 | 1960 | 1965 | 1970 | 1975 | 1980 | 1985 | 1990 | 1995 | 2000 | 2005 | 2010 | 2017 |
|-----------------------|------|------|------|------|------|------|------|------|------|------|------|------|------|------|
| Latvia                | 14.4 | 15.2 | 16.9 | 18.2 | 19.7 | 20.5 | 21.5 | 22.5 | 23.2 | 23.8 | 24.3 | 24.7 | 25.2 | 25.7 |
| Norfolk               | 14.8 | 15.6 | 16.2 | 16.9 | 17.3 | 17.7 | 17.8 | 18.2 | 18.3 | 18.3 | 18.3 | 18.3 | 18.3 | 18.3 |
| Northwest             | 14.5 | 15.1 | 15.7 | 16.1 | 16.5 | 16.9 | 17.1 | 17.3 | 17.4 | 17.4 | 17.4 | 17.4 | 17.4 | 17.4 |
| Southwest             | 14.2 | 14.8 | 15.4 | 15.8 | 16.2 | 16.6 | 16.7 | 16.9 | 17.0 | 17.0 | 17.0 | 17.0 | 17.0 | 17.0 |
| Taiwan                | 14.3 | 14.9 | 15.4 | 15.8 | 16.2 | 16.6 | 16.9 | 17.1 | 17.2 | 17.2 | 17.2 | 17.2 | 17.2 | 17.2 |
| Thailand              | 14.1 | 14.6 | 15.0 | 15.4 | 15.8 | 16.2 | 16.6 | 17.0 | 17.4 | 17.8 | 18.2 | 18.6 | 19.0 | 19.4 |
| Greater London        | 14.3 | 14.7 | 15.0 | 15.2 | 15.4 | 15.6 | 15.7 | 15.8 | 15.9 | 15.9 | 15.9 | 15.9 | 15.9 | 15.9 |
| Kingston and Kingston | 14.4 | 14.8 | 15.2 | 15.6 | 16.0 | 16.4 | 16.8 | 17.2 | 17.6 | 18.0 | 18.4 | 18.8 | 19.2 | 19.6 |
| Buenos                | 14.2 | 14.6 | 15.0 | 15.4 | 15.8 | 16.2 | 16.6 | 17.0 | 17.4 | 17.8 | 18.2 | 18.6 | 19.0 | 19.4 |
| Russia                | 14.1 | 14.5 | 14.9 | 15.3 | 15.7 | 16.1 | 16.5 | 16.9 | 17.3 | 17.7 | 18.1 | 18.5 | 18.9 | 19.3 |
| Italy                 | 14.2 | 14.6 | 15.0 | 15.4 | 15.8 | 16.2 | 16.6 | 17.0 | 17.4 | 17.8 | 18.2 | 18.6 | 19.0 | 19.4 |
| Canada                | 14.3 | 14.7 | 15.1 | 15.5 | 15.9 | 16.3 | 16.7 | 17.1 | 17.5 | 17.9 | 18.3 | 18.7 | 19.1 | 19.5 |
| England               | 14.4 | 14.8 | 15.2 | 15.6 | 16.0 | 16.4 | 16.8 | 17.2 | 17.6 | 18.0 | 18.4 | 18.8 | 19.2 | 19.6 |
| Cyprus                | 14.3 | 14.7 | 15.1 | 15.5 | 15.9 | 16.3 | 16.7 | 17.1 | 17.5 | 17.9 | 18.3 | 18.7 | 19.1 | 19.5 |
| Ecuador               | 14.2 | 14.6 | 15.0 | 15.4 | 15.8 | 16.2 | 16.6 | 17.0 | 17.4 | 17.8 | 18.2 | 18.6 | 19.0 | 19.4 |
| Guatemala             | 14.1 | 14.5 | 14.9 | 15.3 | 15.7 | 16.1 | 16.5 | 16.9 | 17.3 | 17.7 | 18.1 | 18.5 | 18.9 | 19.3 |
| Hawaii                | 14.0 | 14.4 | 14.8 | 15.2 | 15.6 | 16.0 | 16.4 | 16.8 | 17.2 | 17.6 | 18.0 | 18.4 | 18.8 | 19.2 |
| Hong Kong             | 14.2 | 14.6 | 15.0 | 15.4 | 15.8 | 16.2 | 16.6 | 17.0 | 17.4 | 17.8 | 18.2 | 18.6 | 19.0 | 19.4 |
| Honolulu              | 14.1 | 14.5 | 14.9 | 15.3 | 15.7 | 16.1 | 16.5 | 16.9 | 17.3 | 17.7 | 18.1 | 18.5 | 18.9 | 19.3 |
| Indonesia             | 14.0 | 14.4 | 14.8 | 15.2 | 15.6 | 16.0 | 16.4 | 16.8 | 17.2 | 17.6 | 18.0 | 18.4 | 18.8 | 19.2 |
| Japan                 | 14.1 | 14.5 | 14.9 | 15.3 | 15.7 | 16.1 | 16.5 | 16.9 | 17.3 | 17.7 | 18.1 | 18.5 | 18.9 | 19.3 |
| Korea                 | 14.2 | 14.6 | 15.0 | 15.4 | 15.8 | 16.2 | 16.6 | 17.0 | 17.4 | 17.8 | 18.2 | 18.6 | 19.0 | 19.4 |
| Malaysia              | 14.1 | 14.5 | 14.9 | 15.3 | 15.7 | 16.1 | 16.5 | 16.9 | 17.3 | 17.7 | 18.1 | 18.5 | 18.9 | 19.3 |
| Mexico                | 14.0 | 14.4 | 14.8 | 15.2 | 15.6 | 16.0 | 16.4 | 16.8 | 17.2 | 17.6 | 18.0 | 18.4 | 18.8 | 19.2 |
| Morocco               | 14.1 | 14.5 | 14.9 | 15.3 | 15.7 | 16.1 | 16.5 | 16.9 | 17.3 | 17.7 | 18.1 | 18.5 | 18.9 | 19.3 |
| Netherlands           | 14.2 | 14.6 | 15.0 | 15.4 | 15.8 | 16.2 | 16.6 | 17.0 | 17.4 | 17.8 | 18.2 | 18.6 | 19.0 | 19.4 |
| Philippines           | 14.0 | 14.4 | 14.8 | 15.2 | 15.6 | 16.0 | 16.4 | 16.8 | 17.2 | 17.6 | 18.0 | 18.4 | 18.8 | 19.2 |
| Poland                | 14.1 | 14.5 | 14.9 | 15.3 | 15.7 | 16.1 | 16.5 | 16.9 | 17.3 | 17.7 | 18.1 | 18.5 | 18.9 | 19.3 |
| Romania               | 14.0 | 14.4 | 14.8 | 15.2 | 15.6 | 16.0 | 16.4 | 16.8 | 17.2 | 17.6 | 18.0 | 18.4 | 18.8 | 19.2 |
| South Africa          | 14.1 | 14.5 | 14.9 | 15.3 | 15.7 | 16.1 | 16.5 | 16.9 | 17.3 | 17.7 | 18.1 | 18.5 | 18.9 | 19.3 |
| Spain                 | 14.2 | 14.6 | 15.0 | 15.4 | 15.8 | 16.2 | 16.6 | 17.0 | 17.4 | 17.8 | 18.2 | 18.6 | 19.0 | 19.4 |
| Sri Lanka             | 14.1 | 14.5 | 14.9 | 15.3 | 15.7 | 16.1 | 16.5 | 16.9 | 17.3 | 17.7 | 18.1 | 18.5 | 18.9 | 19.3 |
| Tanzania              | 14.0 | 14.4 | 14.8 | 15.2 | 15.6 | 16.0 | 16.4 | 16.8 | 17.2 | 17.6 | 18.0 | 18.4 | 18.8 | 19.2 |
| Trinidad              | 14.1 | 14.5 | 14.9 | 15.3 | 15.7 | 16.1 | 16.5 | 16.9 | 17.3 | 17.7 | 18.1 | 18.5 | 18.9 | 19.3 |
| Uganda                | 14.0 | 14.4 | 14.8 | 15.2 | 15.6 | 16.0 | 16.4 | 16.8 | 17.2 | 17.6 | 18.0 | 18.4 | 18.8 | 19.2 |
| Uzbekistan            | 14.1 | 14.5 | 14.9 | 15.3 | 15.7 | 16.1 | 16.5 | 16.9 | 17.3 | 17.7 | 18.1 | 18.5 | 18.9 | 19.3 |
| Vietnam               | 14.0 | 14.4 | 14.8 | 15.2 | 15.6 | 16.0 | 16.4 | 16.8 | 17.2 | 17.6 | 18.0 | 18.4 | 18.8 | 19.2 |
| Yemen                 | 14.0 | 14.4 | 14.8 | 15.2 | 15.6 | 16.0 | 16.4 | 16.8 | 17.2 | 17.6 | 18.0 | 18.4 | 18.8 | 19.2 |
| Zambia                | 14.0 | 14.4 | 14.8 | 15.2 | 15.6 | 16.0 | 16.4 | 16.8 | 17.2 | 17.6 | 18.0 | 18.4 | 18.8 | 19.2 |

Table 10 Estimates of life expectancy at age 65 by location and year for 1950, 1955, 2005, 2010, 2019 - females

| Location     | 1950        | 1955        | 1960        | 1965        | 1970        | 1975        | 1980        | 1985        | 1990        | 1995        | 2000        | 2005        | 2010        | 2019        |
|--------------|-------------|-------------|-------------|-------------|-------------|-------------|-------------|-------------|-------------|-------------|-------------|-------------|-------------|-------------|
| Buenos Aires | 15.2        | 15.2        | 15.4        | 15.6        | 15.7        | 15.7        | 15.7        | 15.7        | 15.7        | 15.7        | 15.7        | 15.7        | 15.7        | 15.7        |
| Buenos Aires | (15.2-15.9) | (15.2-15.9) | (15.4-16.1) | (15.6-16.3) | (15.7-16.4) | (15.7-16.4) | (15.7-16.4) | (15.7-16.4) | (15.7-16.4) | (15.7-16.4) | (15.7-16.4) | (15.7-16.4) | (15.7-16.4) | (15.7-16.4) |
| Buenos Aires | 15.7        | 15.7        | 15.7        | 15.7        | 15.7        | 15.7        | 15.7        | 15.7        | 15.7        | 15.7        | 15.7        | 15.7        | 15.7        | 15.7        |
| Buenos Aires | (15.7-16.4) | (15.7-16.4) | (15.7-16.4) | (15.7-16.4) | (15.7-16.4) | (15.7-16.4) | (15.7-16.4) | (15.7-16.4) | (15.7-16.4) | (15.7-16.4) | (15.7-16.4) | (15.7-16.4) | (15.7-16.4) | (15.7-16.4) |
| Buenos Aires | 14.7        | 15.4        | 15.9        | 16.3        | 16.9        | 17.3        | 18.1        | 18.7        | 19.7        | 20.3        | 21.2        | 21.4        | 21.4        | 21.4        |
| Buenos Aires | (12.1-17.0) | (14.1-18.2) | (14.1-18.2) | (14.1-18.2) | (14.1-18.2) | (14.1-18.2) | (14.1-18.2) | (14.1-18.2) | (14.1-18.2) | (14.1-18.2) | (14.1-18.2) | (14.1-18.2) | (14.1-18.2) | (14.1-18.2) |
| Buenos Aires | 16.2        | 16.2        | 16.2        | 16.2        | 16.2        | 16.2        | 16.2        | 16.2        | 16.2        | 16.2        | 16.2        | 16.2        | 16.2        | 16.2        |
| Buenos Aires | (13.7-17.2) | (13.7-17.2) | (13.7-17.2) | (13.7-17.2) | (13.7-17.2) | (13.7-17.2) | (13.7-17.2) | (13.7-17.2) | (13.7-17.2) | (13.7-17.2) | (13.7-17.2) | (13.7-17.2) | (13.7-17.2) | (13.7-17.2) |
| Buenos Aires | 16.1        | 16.1        | 16.1        | 16.1        | 16.1        | 16.1        | 16.1        | 16.1        | 16.1        | 16.1        | 16.1        | 16.1        | 16.1        | 16.1        |
| Buenos Aires | (13.7-17.2) | (13.7-17.2) | (13.7-17.2) | (13.7-17.2) | (13.7-17.2) | (13.7-17.2) | (13.7-17.2) | (13.7-17.2) | (13.7-17.2) | (13.7-17.2) | (13.7-17.2) | (13.7-17.2) | (13.7-17.2) | (13.7-17.2) |
| Buenos Aires | 16.5        | 16.5        | 16.5        | 16.5        | 16.5        | 16.5        | 16.5        | 16.5        | 16.5        | 16.5        | 16.5        | 16.5        | 16.5        | 16.5        |
| Buenos Aires | (13.7-17.2) | (13.7-17.2) | (13.7-17.2) | (13.7-17.2) | (13.7-17.2) | (13.7-17.2) | (13.7-17.2) | (13.7-17.2) | (13.7-17.2) | (13.7-17.2) | (13.7-17.2) | (13.7-17.2) | (13.7-17.2) | (13.7-17.2) |
| Buenos Aires | 16.3        | 16.3        | 16.3        | 16.3        | 16.3        | 16.3        | 16.3        | 16.3        | 16.3        | 16.3        | 16.3        | 16.3        | 16.3        | 16.3        |
| Buenos Aires | (13.7-17.2) | (13.7-17.2) | (13.7-17.2) | (13.7-17.2) | (13.7-17.2) | (13.7-17.2) | (13.7-17.2) | (13.7-17.2) | (13.7-17.2) | (13.7-17.2) | (13.7-17.2) | (13.7-17.2) | (13.7-17.2) | (13.7-17.2) |
| Buenos Aires | 16.5        | 16.5        | 16.5        | 16.5        | 16.5        | 16.5        | 16.5        | 16.5        | 16.5        | 16.5        | 16.5        | 16.5        | 16.5        | 16.5        |
| Buenos Aires | (13.7-17.2) | (13.7-17.2) | (13.7-17.2) | (13.7-17.2) | (13.7-17.2) | (13.7-17.2) | (13.7-17.2) | (13.7-17.2) | (13.7-17.2) | (13.7-17.2) | (13.7-17.2) | (13.7-17.2) | (13.7-17.2) | (13.7-17.2) |
| Buenos Aires | 16.3        | 16.3        | 16.3        | 16.3        | 16.3        | 16.3        | 16.3        | 16.3        | 16.3        | 16.3        | 16.3        | 16.3        | 16.3        | 16.3        |
| Buenos Aires | (13.7-17.2) | (13.7-17.2) | (13.7-17.2) | (13.7-17.2) | (13.7-17.2) | (13.7-17.2) | (13.7-17.2) | (13.7-17.2) | (13.7-17.2) | (13.7-17.2) | (13.7-17.2) | (13.7-17.2) | (13.7-17.2) | (13.7-17.2) |
| Buenos Aires | 16.5        | 16.5        | 16.5        | 16.5        | 16.5        | 16.5        | 16.5        | 16.5        | 16.5        | 16.5        | 16.5        | 16.5        | 16.5        | 16.5        |
| Buenos Aires | (13.7-17.2) | (13.7-17.2) | (13.7-17.2) | (13.7-17.2) | (13.7-17.2) | (13.7-17.2) | (13.7-17.2) | (13.7-17.2) | (13.7-17.2) | (13.7-17.2) | (13.7-17.2) | (13.7-17.2) | (13.7-17.2) | (13.7-17.2) |





Table 10 Estimates of life expectancy at age 65 by location and year for 1950, 1955, 2005, 2010, 2019 - females

| Location              | 1950               | 1955               | 1960               | 1965               | 1970               | 1975               | 1980               | 1985               | 1990               | 1995               | 2000               | 2005               | 2010               | 2019               |                    |
|-----------------------|--------------------|--------------------|--------------------|--------------------|--------------------|--------------------|--------------------|--------------------|--------------------|--------------------|--------------------|--------------------|--------------------|--------------------|--------------------|
| Turkmen               | 44.2<br>(12,196.5) | 44.2<br>(12,196.5) | 44.2<br>(12,196.5) | 44.2<br>(12,196.5) | 44.2<br>(12,196.5) | 44.2<br>(12,196.5) | 44.2<br>(12,196.5) | 44.2<br>(12,196.5) | 44.2<br>(12,196.5) | 44.2<br>(12,196.5) | 44.2<br>(12,196.5) | 44.2<br>(12,196.5) | 44.2<br>(12,196.5) | 44.2<br>(12,196.5) | 44.2<br>(12,196.5) |
| Urain Gobi            | 12.4<br>(0.844.8)  | 12.4<br>(0.844.8)  | 12.4<br>(0.844.8)  | 12.4<br>(0.844.8)  | 12.4<br>(0.844.8)  | 12.4<br>(0.844.8)  | 12.4<br>(0.844.8)  | 12.4<br>(0.844.8)  | 12.4<br>(0.844.8)  | 12.4<br>(0.844.8)  | 12.4<br>(0.844.8)  | 12.4<br>(0.844.8)  | 12.4<br>(0.844.8)  | 12.4<br>(0.844.8)  | 12.4<br>(0.844.8)  |
| Uzbek                 | 11.8<br>(0.11.14)  | 11.8<br>(0.11.14)  | 11.8<br>(0.11.14)  | 11.8<br>(0.11.14)  | 11.8<br>(0.11.14)  | 11.8<br>(0.11.14)  | 11.8<br>(0.11.14)  | 11.8<br>(0.11.14)  | 11.8<br>(0.11.14)  | 11.8<br>(0.11.14)  | 11.8<br>(0.11.14)  | 11.8<br>(0.11.14)  | 11.8<br>(0.11.14)  | 11.8<br>(0.11.14)  | 11.8<br>(0.11.14)  |
| Wajir                 | 12.7<br>(1.144.7)  | 12.7<br>(1.144.7)  | 12.7<br>(1.144.7)  | 12.7<br>(1.144.7)  | 12.7<br>(1.144.7)  | 12.7<br>(1.144.7)  | 12.7<br>(1.144.7)  | 12.7<br>(1.144.7)  | 12.7<br>(1.144.7)  | 12.7<br>(1.144.7)  | 12.7<br>(1.144.7)  | 12.7<br>(1.144.7)  | 12.7<br>(1.144.7)  | 12.7<br>(1.144.7)  | 12.7<br>(1.144.7)  |
| West Bank             | 11.8<br>(0.513.7)  | 11.8<br>(0.513.7)  | 11.8<br>(0.513.7)  | 11.8<br>(0.513.7)  | 11.8<br>(0.513.7)  | 11.8<br>(0.513.7)  | 11.8<br>(0.513.7)  | 11.8<br>(0.513.7)  | 11.8<br>(0.513.7)  | 11.8<br>(0.513.7)  | 11.8<br>(0.513.7)  | 11.8<br>(0.513.7)  | 11.8<br>(0.513.7)  | 11.8<br>(0.513.7)  | 11.8<br>(0.513.7)  |
| Madagascar            | 10.1<br>(0.310.8)  | 10.1<br>(0.310.8)  | 10.1<br>(0.310.8)  | 10.1<br>(0.310.8)  | 10.1<br>(0.310.8)  | 10.1<br>(0.310.8)  | 10.1<br>(0.310.8)  | 10.1<br>(0.310.8)  | 10.1<br>(0.310.8)  | 10.1<br>(0.310.8)  | 10.1<br>(0.310.8)  | 10.1<br>(0.310.8)  | 10.1<br>(0.310.8)  | 10.1<br>(0.310.8)  | 10.1<br>(0.310.8)  |
| Mali                  | 10.1<br>(0.211.1)  | 10.1<br>(0.211.1)  | 10.1<br>(0.211.1)  | 10.1<br>(0.211.1)  | 10.1<br>(0.211.1)  | 10.1<br>(0.211.1)  | 10.1<br>(0.211.1)  | 10.1<br>(0.211.1)  | 10.1<br>(0.211.1)  | 10.1<br>(0.211.1)  | 10.1<br>(0.211.1)  | 10.1<br>(0.211.1)  | 10.1<br>(0.211.1)  | 10.1<br>(0.211.1)  | 10.1<br>(0.211.1)  |
| Mozambique            | 10.5<br>(0.412.7)  | 10.5<br>(0.412.7)  | 10.5<br>(0.412.7)  | 10.5<br>(0.412.7)  | 10.5<br>(0.412.7)  | 10.5<br>(0.412.7)  | 10.5<br>(0.412.7)  | 10.5<br>(0.412.7)  | 10.5<br>(0.412.7)  | 10.5<br>(0.412.7)  | 10.5<br>(0.412.7)  | 10.5<br>(0.412.7)  | 10.5<br>(0.412.7)  | 10.5<br>(0.412.7)  | 10.5<br>(0.412.7)  |
| Niger                 | 10.1<br>(0.310.8)  | 10.1<br>(0.310.8)  | 10.1<br>(0.310.8)  | 10.1<br>(0.310.8)  | 10.1<br>(0.310.8)  | 10.1<br>(0.310.8)  | 10.1<br>(0.310.8)  | 10.1<br>(0.310.8)  | 10.1<br>(0.310.8)  | 10.1<br>(0.310.8)  | 10.1<br>(0.310.8)  | 10.1<br>(0.310.8)  | 10.1<br>(0.310.8)  | 10.1<br>(0.310.8)  | 10.1<br>(0.310.8)  |
| Nigeria               | 11.1<br>(0.211.1)  | 11.1<br>(0.211.1)  | 11.1<br>(0.211.1)  | 11.1<br>(0.211.1)  | 11.1<br>(0.211.1)  | 11.1<br>(0.211.1)  | 11.1<br>(0.211.1)  | 11.1<br>(0.211.1)  | 11.1<br>(0.211.1)  | 11.1<br>(0.211.1)  | 11.1<br>(0.211.1)  | 11.1<br>(0.211.1)  | 11.1<br>(0.211.1)  | 11.1<br>(0.211.1)  | 11.1<br>(0.211.1)  |
| San Tomé and Príncipe | 11.1<br>(0.211.1)  | 11.1<br>(0.211.1)  | 11.1<br>(0.211.1)  | 11.1<br>(0.211.1)  | 11.1<br>(0.211.1)  | 11.1<br>(0.211.1)  | 11.1<br>(0.211.1)  | 11.1<br>(0.211.1)  | 11.1<br>(0.211.1)  | 11.1<br>(0.211.1)  | 11.1<br>(0.211.1)  | 11.1<br>(0.211.1)  | 11.1<br>(0.211.1)  | 11.1<br>(0.211.1)  | 11.1<br>(0.211.1)  |
| Senegal               | 11.7<br>(0.616.1)  | 11.7<br>(0.616.1)  | 11.7<br>(0.616.1)  | 11.7<br>(0.616.1)  | 11.7<br>(0.616.1)  | 11.7<br>(0.616.1)  | 11.7<br>(0.616.1)  | 11.7<br>(0.616.1)  | 11.7<br>(0.616.1)  | 11.7<br>(0.616.1)  | 11.7<br>(0.616.1)  | 11.7<br>(0.616.1)  | 11.7<br>(0.616.1)  | 11.7<br>(0.616.1)  | 11.7<br>(0.616.1)  |
| Sierra Leone          | 11.2<br>(0.312.6)  | 11.2<br>(0.312.6)  | 11.2<br>(0.312.6)  | 11.2<br>(0.312.6)  | 11.2<br>(0.312.6)  | 11.2<br>(0.312.6)  | 11.2<br>(0.312.6)  | 11.2<br>(0.312.6)  | 11.2<br>(0.312.6)  | 11.2<br>(0.312.6)  | 11.2<br>(0.312.6)  | 11.2<br>(0.312.6)  | 11.2<br>(0.312.6)  | 11.2<br>(0.312.6)  | 11.2<br>(0.312.6)  |
| Togo                  | 11.2<br>(0.312.6)  | 11.2<br>(0.312.6)  | 11.2<br>(0.312.6)  | 11.2<br>(0.312.6)  | 11.2<br>(0.312.6)  | 11.2<br>(0.312.6)  | 11.2<br>(0.312.6)  | 11.2<br>(0.312.6)  | 11.2<br>(0.312.6)  | 11.2<br>(0.312.6)  | 11.2<br>(0.312.6)  | 11.2<br>(0.312.6)  | 11.2<br>(0.312.6)  | 11.2<br>(0.312.6)  | 11.2<br>(0.312.6)  |













| Location     | 1950 | 1955 | 1960 | 1965 | 1970 | 1975 | 1980 | 1985 | 1990 | 1995 | 2000 | 2005 | 2010 | 2017 |
|--------------|------|------|------|------|------|------|------|------|------|------|------|------|------|------|
| Tanzania     | 48.8 | 51.2 | 53.6 | 56.0 | 58.4 | 60.8 | 63.2 | 65.6 | 68.0 | 70.4 | 72.8 | 75.2 | 77.6 | 80.0 |
| Timor        | 50.4 | 52.8 | 55.2 | 57.6 | 60.0 | 62.4 | 64.8 | 67.2 | 69.6 | 72.0 | 74.4 | 76.8 | 79.2 | 81.6 |
| Togo         | 40.1 | 41.5 | 42.9 | 44.3 | 45.7 | 47.1 | 48.5 | 49.9 | 51.3 | 52.7 | 54.1 | 55.5 | 56.9 | 58.3 |
| Turkmenistan | 62.1 | 63.5 | 64.9 | 66.3 | 67.7 | 69.1 | 70.5 | 71.9 | 73.3 | 74.7 | 76.1 | 77.5 | 78.9 | 80.3 |
| Uganda       | 47.6 | 49.0 | 50.4 | 51.8 | 53.2 | 54.6 | 56.0 | 57.4 | 58.8 | 60.2 | 61.6 | 63.0 | 64.4 | 65.8 |
| Uzbekistan   | 67.2 | 68.6 | 70.0 | 71.4 | 72.8 | 74.2 | 75.6 | 77.0 | 78.4 | 79.8 | 81.2 | 82.6 | 84.0 | 85.4 |
| Vietnam      | 58.4 | 60.8 | 63.2 | 65.6 | 68.0 | 70.4 | 72.8 | 75.2 | 77.6 | 80.0 | 82.4 | 84.8 | 87.2 | 89.6 |
| Yemen        | 38.1 | 39.5 | 40.9 | 42.3 | 43.7 | 45.1 | 46.5 | 47.9 | 49.3 | 50.7 | 52.1 | 53.5 | 54.9 | 56.3 |
| Zambia       | 45.2 | 46.6 | 48.0 | 49.4 | 50.8 | 52.2 | 53.6 | 55.0 | 56.4 | 57.8 | 59.2 | 60.6 | 62.0 | 63.4 |
| Zimbabwe     | 42.8 | 44.2 | 45.6 | 47.0 | 48.4 | 49.8 | 51.2 | 52.6 | 54.0 | 55.4 | 56.8 | 58.2 | 59.6 | 61.0 |
| World        | 51.8 | 53.2 | 54.6 | 56.0 | 57.4 | 58.8 | 60.2 | 61.6 | 63.0 | 64.4 | 65.8 | 67.2 | 68.6 | 70.0 |



Table 12 Under-5 mortality rates by location and year for 1950, 1955, 2000, 2010, 2017 - both sexes

| Location           | 1950   | 1955   | 1960   | 1965   | 1970   | 1975  | 1980  | 1985  | 1990  | 1995  | 2000  | 2005  | 2010 | 2017 |
|--------------------|--------|--------|--------|--------|--------|-------|-------|-------|-------|-------|-------|-------|------|------|
| Global             | 234.49 | 173.13 | 137.13 | 107.13 | 77.13  | 57.13 | 47.13 | 37.13 | 27.13 | 17.13 | 7.13  | 3.13  | 2.13 | 1.13 |
| Low SDI            | 278.58 | 207.11 | 167.11 | 132.11 | 102.11 | 77.11 | 62.11 | 52.11 | 42.11 | 32.11 | 22.11 | 12.11 | 7.11 | 4.11 |
| High SDI           | 190.40 | 136.16 | 107.16 | 82.16  | 57.16  | 37.16 | 27.16 | 17.16 | 7.16  | 2.16  | 1.16  | 0.16  | 0.16 | 0.16 |
| Central Asia       | 224.47 | 164.47 | 124.47 | 94.47  | 64.47  | 44.47 | 34.47 | 24.47 | 14.47 | 4.47  | 1.47  | 0.47  | 0.47 | 0.47 |
| East Asia          | 184.49 | 134.49 | 104.49 | 74.49  | 44.49  | 24.49 | 14.49 | 4.49  | 1.49  | 0.49  | 0.49  | 0.49  | 0.49 | 0.49 |
| Europe             | 144.51 | 94.51  | 64.51  | 34.51  | 14.51  | 4.51  | 1.51  | 0.51  | 0.51  | 0.51  | 0.51  | 0.51  | 0.51 | 0.51 |
| Latin America      | 104.53 | 74.53  | 44.53  | 24.53  | 14.53  | 4.53  | 1.53  | 0.53  | 0.53  | 0.53  | 0.53  | 0.53  | 0.53 | 0.53 |
| Middle East        | 164.55 | 114.55 | 84.55  | 54.55  | 34.55  | 24.55 | 14.55 | 4.55  | 1.55  | 0.55  | 0.55  | 0.55  | 0.55 | 0.55 |
| North America      | 84.57  | 54.57  | 24.57  | 14.57  | 4.57   | 1.57  | 0.57  | 0.57  | 0.57  | 0.57  | 0.57  | 0.57  | 0.57 | 0.57 |
| South America      | 124.59 | 94.59  | 64.59  | 34.59  | 14.59  | 4.59  | 1.59  | 0.59  | 0.59  | 0.59  | 0.59  | 0.59  | 0.59 | 0.59 |
| Sub-Saharan Africa | 264.61 | 194.61 | 154.61 | 114.61 | 84.61  | 54.61 | 34.61 | 24.61 | 14.61 | 4.61  | 1.61  | 0.61  | 0.61 | 0.61 |
| World              | 234.49 | 173.13 | 137.13 | 107.13 | 77.13  | 57.13 | 47.13 | 37.13 | 27.13 | 17.13 | 7.13  | 3.13  | 2.13 | 1.13 |







Table 12 Under-5 mortality rates by location and year for 1950, 1955, 2000, 2010, 2017 - both sexes

| Location           | 1950          | 1955          | 1960          | 1965          | 1970          | 1975          | 1980          | 1985          | 1990          | 1995          | 2000          | 2005          | 2010          | 2017          |
|--------------------|---------------|---------------|---------------|---------------|---------------|---------------|---------------|---------------|---------------|---------------|---------------|---------------|---------------|---------------|
| Armenia            | 28.29         | 25.20         | 23.77         | 22.77         | 21.66         | 20.46         | 19.14         | 17.85         | 16.59         | 15.36         | 14.18         | 13.04         | 11.94         | 10.81         |
| Burkina Faso       | 29.47 (30.96) | 27.15 (28.10) | 25.20 (26.12) | 23.47 (24.32) | 21.91 (22.67) | 20.46 (21.14) | 19.14 (19.74) | 17.85 (18.38) | 16.59 (17.07) | 15.36 (15.74) | 14.18 (14.52) | 13.04 (13.32) | 11.94 (12.17) | 10.81 (11.04) |
| Burundi            | 34.19         | 32.89         | 31.29         | 29.67         | 28.07         | 26.47         | 24.87         | 23.27         | 21.67         | 20.07         | 18.47         | 16.87         | 15.27         | 13.67         |
| Cameroon           | 31.14         | 29.14         | 27.14         | 25.14         | 23.14         | 21.14         | 19.14         | 17.14         | 15.14         | 13.14         | 11.14         | 9.14          | 7.14          | 5.14          |
| Chad               | 31.14         | 29.14         | 27.14         | 25.14         | 23.14         | 21.14         | 19.14         | 17.14         | 15.14         | 13.14         | 11.14         | 9.14          | 7.14          | 5.14          |
| Cote d'Ivoire      | 31.14         | 29.14         | 27.14         | 25.14         | 23.14         | 21.14         | 19.14         | 17.14         | 15.14         | 13.14         | 11.14         | 9.14          | 7.14          | 5.14          |
| Dominican Republic | 31.14         | 29.14         | 27.14         | 25.14         | 23.14         | 21.14         | 19.14         | 17.14         | 15.14         | 13.14         | 11.14         | 9.14          | 7.14          | 5.14          |
| Egypt              | 31.14         | 29.14         | 27.14         | 25.14         | 23.14         | 21.14         | 19.14         | 17.14         | 15.14         | 13.14         | 11.14         | 9.14          | 7.14          | 5.14          |
| Ecuador            | 31.14         | 29.14         | 27.14         | 25.14         | 23.14         | 21.14         | 19.14         | 17.14         | 15.14         | 13.14         | 11.14         | 9.14          | 7.14          | 5.14          |
| El Salvador        | 31.14         | 29.14         | 27.14         | 25.14         | 23.14         | 21.14         | 19.14         | 17.14         | 15.14         | 13.14         | 11.14         | 9.14          | 7.14          | 5.14          |
| Guatemala          | 31.14         | 29.14         | 27.14         | 25.14         | 23.14         | 21.14         | 19.14         | 17.14         | 15.14         | 13.14         | 11.14         | 9.14          | 7.14          | 5.14          |
| Honduras           | 31.14         | 29.14         | 27.14         | 25.14         | 23.14         | 21.14         | 19.14         | 17.14         | 15.14         | 13.14         | 11.14         | 9.14          | 7.14          | 5.14          |
| India              | 31.14         | 29.14         | 27.14         | 25.14         | 23.14         | 21.14         | 19.14         | 17.14         | 15.14         | 13.14         | 11.14         | 9.14          | 7.14          | 5.14          |
| Indonesia          | 31.14         | 29.14         | 27.14         | 25.14         | 23.14         | 21.14         | 19.14         | 17.14         | 15.14         | 13.14         | 11.14         | 9.14          | 7.14          | 5.14          |
| Kenya              | 31.14         | 29.14         | 27.14         | 25.14         | 23.14         | 21.14         | 19.14         | 17.14         | 15.14         | 13.14         | 11.14         | 9.14          | 7.14          | 5.14          |
| Madagascar         | 31.14         | 29.14         | 27.14         | 25.14         | 23.14         | 21.14         | 19.14         | 17.14         | 15.14         | 13.14         | 11.14         | 9.14          | 7.14          | 5.14          |
| Mali               | 31.14         | 29.14         | 27.14         | 25.14         | 23.14         | 21.14         | 19.14         | 17.14         | 15.14         | 13.14         | 11.14         | 9.14          | 7.14          | 5.14          |
| Mexico             | 31.14         | 29.14         | 27.14         | 25.14         | 23.14         | 21.14         | 19.14         | 17.14         | 15.14         | 13.14         | 11.14         | 9.14          | 7.14          | 5.14          |
| Niger              | 31.14         | 29.14         | 27.14         | 25.14         | 23.14         | 21.14         | 19.14         | 17.14         | 15.14         | 13.14         | 11.14         | 9.14          | 7.14          | 5.14          |
| Nigeria            | 31.14         | 29.14         | 27.14         | 25.14         | 23.14         | 21.14         | 19.14         | 17.14         | 15.14         | 13.14         | 11.14         | 9.14          | 7.14          | 5.14          |
| Rwanda             | 31.14         | 29.14         | 27.14         | 25.14         | 23.14         | 21.14         | 19.14         | 17.14         | 15.14         | 13.14         | 11.14         | 9.14          | 7.14          | 5.14          |
| Senegal            | 31.14         | 29.14         | 27.14         | 25.14         | 23.14         | 21.14         | 19.14         | 17.14         | 15.14         | 13.14         | 11.14         | 9.14          | 7.14          | 5.14          |
| Sierra Leone       | 31.14         | 29.14         | 27.14         | 25.14         | 23.14         | 21.14         | 19.14         | 17.14         | 15.14         | 13.14         | 11.14         | 9.14          | 7.14          | 5.14          |
| Tanzania           | 31.14         | 29.14         | 27.14         | 25.14         | 23.14         | 21.14         | 19.14         | 17.14         | 15.14         | 13.14         | 11.14         | 9.14          | 7.14          | 5.14          |
| Togo               | 31.14         | 29.14         | 27.14         | 25.14         | 23.14         | 21.14         | 19.14         | 17.14         | 15.14         | 13.14         | 11.14         | 9.14          | 7.14          | 5.14          |
| Tunisia            | 31.14         | 29.14         | 27.14         | 25.14         | 23.14         | 21.14         | 19.14         | 17.14         | 15.14         | 13.14         | 11.14         | 9.14          | 7.14          | 5.14          |
| Uganda             | 31.14         | 29.14         | 27.14         | 25.14         | 23.14         | 21.14         | 19.14         | 17.14         | 15.14         | 13.14         | 11.14         | 9.14          | 7.14          | 5.14          |
| Zambia             | 31.14         | 29.14         | 27.14         | 25.14         | 23.14         | 21.14         | 19.14         | 17.14         | 15.14         | 13.14         | 11.14         | 9.14          | 7.14          | 5.14          |
| Zimbabwe           | 31.14         | 29.14         | 27.14         | 25.14         | 23.14         | 21.14         | 19.14         | 17.14         | 15.14         | 13.14         | 11.14         | 9.14          | 7.14          | 5.14          |

Table 12 Under-5 mortality rates by location and year for 1950, 1955, 2000, 2010, 2017 - both sexes

| Location            | 1950  | 1955  | 1960  | 1965  | 1970  | 1975  | 1980  | 1985  | 1990  | 1995  | 2000  | 2005  | 2010  | 2017  |
|---------------------|-------|-------|-------|-------|-------|-------|-------|-------|-------|-------|-------|-------|-------|-------|
| Algeria             | 157.8 | 157.8 | 157.8 | 157.8 | 157.8 | 157.8 | 157.8 | 157.8 | 157.8 | 157.8 | 157.8 | 157.8 | 157.8 | 157.8 |
| Algeria (1950-2017) | 157.8 | 157.8 | 157.8 | 157.8 | 157.8 | 157.8 | 157.8 | 157.8 | 157.8 | 157.8 | 157.8 | 157.8 | 157.8 | 157.8 |
| Algeria (1950-1954) | 157.8 | 157.8 | 157.8 | 157.8 | 157.8 | 157.8 | 157.8 | 157.8 | 157.8 | 157.8 | 157.8 | 157.8 | 157.8 | 157.8 |
| Algeria (1955-1959) | 157.8 | 157.8 | 157.8 | 157.8 | 157.8 | 157.8 | 157.8 | 157.8 | 157.8 | 157.8 | 157.8 | 157.8 | 157.8 | 157.8 |
| Algeria (1960-1964) | 157.8 | 157.8 | 157.8 | 157.8 | 157.8 | 157.8 | 157.8 | 157.8 | 157.8 | 157.8 | 157.8 | 157.8 | 157.8 | 157.8 |
| Algeria (1965-1969) | 157.8 | 157.8 | 157.8 | 157.8 | 157.8 | 157.8 | 157.8 | 157.8 | 157.8 | 157.8 | 157.8 | 157.8 | 157.8 | 157.8 |
| Algeria (1970-1974) | 157.8 | 157.8 | 157.8 | 157.8 | 157.8 | 157.8 | 157.8 | 157.8 | 157.8 | 157.8 | 157.8 | 157.8 | 157.8 | 157.8 |
| Algeria (1975-1979) | 157.8 | 157.8 | 157.8 | 157.8 | 157.8 | 157.8 | 157.8 | 157.8 | 157.8 | 157.8 | 157.8 | 157.8 | 157.8 | 157.8 |
| Algeria (1980-1984) | 157.8 | 157.8 | 157.8 | 157.8 | 157.8 | 157.8 | 157.8 | 157.8 | 157.8 | 157.8 | 157.8 | 157.8 | 157.8 | 157.8 |
| Algeria (1985-1989) | 157.8 | 157.8 | 157.8 | 157.8 | 157.8 | 157.8 | 157.8 | 157.8 | 157.8 | 157.8 | 157.8 | 157.8 | 157.8 | 157.8 |
| Algeria (1990-1994) | 157.8 | 157.8 | 157.8 | 157.8 | 157.8 | 157.8 | 157.8 | 157.8 | 157.8 | 157.8 | 157.8 | 157.8 | 157.8 | 157.8 |
| Algeria (1995-1999) | 157.8 | 157.8 | 157.8 | 157.8 | 157.8 | 157.8 | 157.8 | 157.8 | 157.8 | 157.8 | 157.8 | 157.8 | 157.8 | 157.8 |
| Algeria (2000-2004) | 157.8 | 157.8 | 157.8 | 157.8 | 157.8 | 157.8 | 157.8 | 157.8 | 157.8 | 157.8 | 157.8 | 157.8 | 157.8 | 157.8 |
| Algeria (2005-2009) | 157.8 | 157.8 | 157.8 | 157.8 | 157.8 | 157.8 | 157.8 | 157.8 | 157.8 | 157.8 | 157.8 | 157.8 | 157.8 | 157.8 |
| Algeria (2010-2014) | 157.8 | 157.8 | 157.8 | 157.8 | 157.8 | 157.8 | 157.8 | 157.8 | 157.8 | 157.8 | 157.8 | 157.8 | 157.8 | 157.8 |
| Algeria (2015-2016) | 157.8 | 157.8 | 157.8 | 157.8 | 157.8 | 157.8 | 157.8 | 157.8 | 157.8 | 157.8 | 157.8 | 157.8 | 157.8 | 157.8 |
| Algeria (2017)      | 157.8 | 157.8 | 157.8 | 157.8 | 157.8 | 157.8 | 157.8 | 157.8 | 157.8 | 157.8 | 157.8 | 157.8 | 157.8 | 157.8 |

Table 12 Under-5 mortality rates by location year for 1950, 1955, 2005, 2010, 2017 - huss.csv

| Location     | 1950 | 1955 | 2005 | 2010 | 2017 |
|--------------|------|------|------|------|------|
| Tanzania     | 2850 | 2800 | 2491 | 2462 | 1721 |
| Togo         | 2849 | 2749 | 2491 | 2462 | 1721 |
| Tonga        | 2849 | 2749 | 2491 | 2462 | 1721 |
| Turkey       | 2849 | 2749 | 2491 | 2462 | 1721 |
| Turkmenistan | 2849 | 2749 | 2491 | 2462 | 1721 |
| Tuvalu       | 2849 | 2749 | 2491 | 2462 | 1721 |
| Uganda       | 2849 | 2749 | 2491 | 2462 | 1721 |
| Ukraine      | 2849 | 2749 | 2491 | 2462 | 1721 |
| Uruguay      | 2849 | 2749 | 2491 | 2462 | 1721 |
| USA          | 2849 | 2749 | 2491 | 2462 | 1721 |
| Venezuela    | 2849 | 2749 | 2491 | 2462 | 1721 |
| Vietnam      | 2849 | 2749 | 2491 | 2462 | 1721 |
| Yemen        | 2849 | 2749 | 2491 | 2462 | 1721 |
| Zambia       | 2849 | 2749 | 2491 | 2462 | 1721 |
| Zimbabwe     | 2849 | 2749 | 2491 | 2462 | 1721 |



Table 13 Under-5 mortality rates by location and year for 1950, 1965, 2000, 2010, 2019 - females

Table with 15 columns representing years (1950, 1965, 2000, 2010, 2019) and rows listing various countries and regions such as Global, Low SDI, Middle SDI, High SDI, Central Asia, Eastern Europe, and Central Asia, along with sub-regions like Armenia, Azerbaijan, Georgia, Kazakhstan, Kyrgyzstan, Mongolia, Tajikistan, Turkmenistan, Uzbekistan, Central Europe, Albania, Bosnia and Herzegovina, Bulgaria, Croatia, Czech Republic, Hungary, Macedonia, Montenegro, Poland, Romania, Serbia, Slovakia, Slovenia, Estonia, Latvia, Lithuania, Moldova, Russian Federation, Ukraine, High-income, Australia, Austria, New Zealand, High-income Asia-Pacific, Brunei, Japan, Aichi, Alita, Armenia, Cambodia, China, Djibouti, Egypt, Finland, France, Gabon, Guinea, Haiti, Honduras, Iceland, India, Indonesia, Iraq, Israel, Jordan, Kenya, Kiribati, Kuwait, Lao PDR, Lebanon, Lesotho, Liberia, Lithuania, Luxembourg, Madagascar, Maldives, Mali, Marshall Islands, Mauritius, Mexico, Micronesia, Monaco, Myanmar, Nepal, Niger, Nigeria, North Macedonia, Oman, Pakistan, Palau, Panama, Papua New Guinea, Paraguay, Peru, Philippines, Qatar, Romania, Russian Federation, Rwanda, Saudi Arabia, Senegal, Serbia, Sierra Leone, Singapore, South Africa, South Korea, Sri Lanka, Sudan, Switzerland, Tajikistan, Thailand, Timor-Leste, Trinidad and Tobago, Turkey, Turkmenistan, Uzbekistan, Vanuatu, Venezuela, Viet Nam, Yemen, Zambia, Zimbabwe.



















Table 14 Under-5 mortality rates by location and year for 1950, 1955, 2005, 2010, 2017 - males

Table with 16 columns: Location, 1950, 1955, 1960, 1965, 1970, 1975, 1980, 1985, 1990, 1995, 2000, 2005, 2010, 2017. The table lists mortality rates for 140 different locations across various regions.











**Table 15 Ratio of adjusted to unadjusted 5q0 values for scaled locations by year**

| <b>Geography</b> | <b>Year</b> | <b>Ratio</b>     |
|------------------|-------------|------------------|
| Japan            | 1950        | 1.0<br>(1.0–1.0) |
| Japan            | 1951        | 1.0<br>(1.0–1.0) |
| Japan            | 1952        | 1.0<br>(1.0–1.0) |
| Japan            | 1953        | 1.0<br>(1.0–1.0) |
| Japan            | 1954        | 1.0<br>(1.0–1.0) |
| Japan            | 1955        | 1.0<br>(1.0–1.0) |
| Japan            | 1956        | 1.0<br>(1.0–1.0) |
| Japan            | 1957        | 1.0<br>(1.0–1.0) |
| Japan            | 1958        | 1.0<br>(1.0–1.0) |
| Japan            | 1959        | 1.0<br>(1.0–1.0) |
| Japan            | 1960        | 1.0<br>(1.0–1.0) |
| Japan            | 1961        | 1.0<br>(1.0–1.0) |
| Japan            | 1962        | 1.0<br>(1.0–1.0) |
| Japan            | 1963        | 1.0<br>(1.0–1.0) |
| Japan            | 1964        | 1.0<br>(1.0–1.0) |
| Japan            | 1965        | 1.0<br>(1.0–1.0) |
| Japan            | 1966        | 1.0<br>(1.0–1.0) |
| Japan            | 1967        | 1.0<br>(1.0–1.0) |
| Japan            | 1968        | 1.0<br>(1.0–1.0) |
| Japan            | 1969        | 1.0<br>(1.0–1.0) |
| Japan            | 1970        | 1.0<br>(1.0–1.0) |
| Japan            | 1971        | 1.0<br>(1.0–1.0) |
| Japan            | 1972        | 1.0<br>(1.0–1.0) |
| Japan            | 1973        | 1.0<br>(1.0–1.0) |
| Japan            | 1974        | 1.0<br>(1.0–1.0) |
| Japan            | 1975        | 1.0<br>(1.0–1.0) |
| Japan            | 1976        | 1.0<br>(1.0–1.0) |
| Japan            | 1977        | 1.0<br>(1.0–1.0) |
| Japan            | 1978        | 1.0<br>(1.0–1.0) |
| Japan            | 1979        | 1.0<br>(1.0–1.0) |
| Japan            | 1980        | 1.0<br>(1.0–1.0) |

**Table 15 Ratio of adjusted to unadjusted 5q0 values for scaled locations by year**

| <b>Geography</b> | <b>Year</b> | <b>Ratio</b>     |
|------------------|-------------|------------------|
| Japan            | 1981        | 1.0<br>(1.0-1.0) |
| Japan            | 1982        | 1.0<br>(1.0-1.0) |
| Japan            | 1983        | 1.0<br>(1.0-1.0) |
| Japan            | 1984        | 1.0<br>(1.0-1.0) |
| Japan            | 1985        | 1.0<br>(1.0-1.0) |
| Japan            | 1986        | 1.0<br>(1.0-1.0) |
| Japan            | 1987        | 1.0<br>(1.0-1.0) |
| Japan            | 1988        | 1.0<br>(1.0-1.0) |
| Japan            | 1989        | 1.0<br>(1.0-1.0) |
| Japan            | 1990        | 1.0<br>(1.0-1.0) |
| Japan            | 1991        | 1.0<br>(1.0-1.0) |
| Japan            | 1992        | 1.0<br>(1.0-1.0) |
| Japan            | 1993        | 1.0<br>(1.0-1.0) |
| Japan            | 1994        | 1.0<br>(1.0-1.0) |
| Japan            | 1995        | 1.0<br>(1.0-1.0) |
| Japan            | 1996        | 1.0<br>(1.0-1.0) |
| Japan            | 1997        | 1.0<br>(1.0-1.0) |
| Japan            | 1998        | 1.0<br>(1.0-1.0) |
| Japan            | 1999        | 1.0<br>(1.0-1.0) |
| Japan            | 2000        | 1.0<br>(1.0-1.0) |
| Japan            | 2001        | 1.0<br>(1.0-1.0) |
| Japan            | 2002        | 1.0<br>(1.0-1.0) |
| Japan            | 2003        | 1.0<br>(1.0-1.0) |
| Japan            | 2004        | 1.0<br>(1.0-1.0) |
| Japan            | 2005        | 1.0<br>(1.0-1.0) |
| Japan            | 2006        | 1.0<br>(1.0-1.0) |
| Japan            | 2007        | 1.0<br>(1.0-1.0) |
| Japan            | 2008        | 1.0<br>(1.0-1.0) |
| Japan            | 2009        | 1.0<br>(1.0-1.0) |
| Japan            | 2010        | 1.0<br>(1.0-1.0) |
| Japan            | 2011        | 1.0<br>(1.0-1.0) |

**Table 15 Ratio of adjusted to unadjusted 5q0 values for scaled locations by year**

| <b>Geography</b> | <b>Year</b> | <b>Ratio</b>        |
|------------------|-------------|---------------------|
| Japan            | 2012        | 1.0<br>(1.0–1.0)    |
| Japan            | 2013        | 1.0<br>(1.0–1.0)    |
| Japan            | 2014        | 1.0<br>(1.0–1.0)    |
| Japan            | 2015        | 1.0<br>(1.0–1.0)    |
| Japan            | 2016        | 1.0<br>(1.0–1.0)    |
| Japan            | 2017        | 1.0<br>(1.0–1.0)    |
| Aichi            | 1950        | 1.62<br>(1.33–1.93) |
| Aichi            | 1951        | 1.59<br>(1.31–1.9)  |
| Aichi            | 1952        | 1.41<br>(1.17–1.67) |
| Aichi            | 1953        | 1.42<br>(1.18–1.68) |
| Aichi            | 1954        | 1.37<br>(1.15–1.61) |
| Aichi            | 1955        | 1.27<br>(1.07–1.48) |
| Aichi            | 1956        | 1.33<br>(1.12–1.56) |
| Aichi            | 1957        | 1.37<br>(1.16–1.6)  |
| Aichi            | 1958        | 1.3<br>(1.1–1.52)   |
| Aichi            | 1959        | 1.31<br>(1.11–1.53) |
| Aichi            | 1960        | 1.28<br>(1.07–1.49) |
| Aichi            | 1961        | 1.27<br>(1.07–1.5)  |
| Aichi            | 1962        | 1.27<br>(1.05–1.51) |
| Aichi            | 1963        | 1.19<br>(0.97–1.41) |
| Aichi            | 1964        | 1.14<br>(0.93–1.36) |
| Aichi            | 1965        | 1.1<br>(0.89–1.32)  |
| Aichi            | 1966        | 1.05<br>(0.86–1.25) |
| Aichi            | 1967        | 1.15<br>(0.95–1.37) |
| Aichi            | 1968        | 1.07<br>(0.89–1.27) |
| Aichi            | 1969        | 1.12<br>(0.94–1.31) |
| Aichi            | 1970        | 1.13<br>(0.95–1.32) |
| Aichi            | 1971        | 1.11<br>(0.95–1.3)  |
| Aichi            | 1972        | 1.11<br>(0.95–1.29) |
| Aichi            | 1973        | 1.15<br>(1.0–1.32)  |
| Aichi            | 1974        | 1.11<br>(0.98–1.26) |

**Table 15 Ratio of adjusted to unadjusted 5q0 values for scaled locations by year**

| <b>Geography</b> | <b>Year</b> | <b>Ratio</b>        |
|------------------|-------------|---------------------|
| Aichi            | 1975        | 1.07<br>(0.95–1.19) |
| Aichi            | 1976        | 1.05<br>(0.95–1.16) |
| Aichi            | 1977        | 1.04<br>(0.96–1.12) |
| Aichi            | 1978        | 1.03<br>(0.97–1.09) |
| Aichi            | 1979        | 1.01<br>(0.97–1.05) |
| Aichi            | 1980        | 1.0<br>(0.98–1.03)  |
| Aichi            | 1981        | 1.01<br>(0.99–1.04) |
| Aichi            | 1982        | 1.0<br>(0.97–1.02)  |
| Aichi            | 1983        | 1.0<br>(0.97–1.02)  |
| Aichi            | 1984        | 1.01<br>(0.98–1.03) |
| Aichi            | 1985        | 0.98<br>(0.95–1.01) |
| Aichi            | 1986        | 0.99<br>(0.96–1.02) |
| Aichi            | 1987        | 0.98<br>(0.95–1.01) |
| Aichi            | 1988        | 0.98<br>(0.95–1.01) |
| Aichi            | 1989        | 0.97<br>(0.94–1.0)  |
| Aichi            | 1990        | 1.01<br>(0.97–1.04) |
| Aichi            | 1991        | 0.99<br>(0.96–1.02) |
| Aichi            | 1992        | 1.02<br>(0.99–1.05) |
| Aichi            | 1993        | 1.02<br>(0.99–1.06) |
| Aichi            | 1994        | 1.03<br>(0.99–1.06) |
| Aichi            | 1995        | 1.03<br>(0.99–1.06) |
| Aichi            | 1996        | 0.99<br>(0.96–1.02) |
| Aichi            | 1997        | 0.99<br>(0.96–1.03) |
| Aichi            | 1998        | 1.03<br>(1.0–1.07)  |
| Aichi            | 1999        | 0.99<br>(0.96–1.03) |
| Aichi            | 2000        | 0.99<br>(0.95–1.02) |
| Aichi            | 2001        | 0.97<br>(0.93–1.01) |
| Aichi            | 2002        | 0.98<br>(0.94–1.02) |
| Aichi            | 2003        | 0.98<br>(0.94–1.02) |
| Aichi            | 2004        | 0.98<br>(0.94–1.02) |
| Aichi            | 2005        | 0.99<br>(0.95–1.03) |

**Table 15 Ratio of adjusted to unadjusted 5q0 values for scaled locations by year**

| <b>Geography</b> | <b>Year</b> | <b>Ratio</b>        |
|------------------|-------------|---------------------|
| Aichi            | 2006        | 0.99<br>(0.95–1.03) |
| Aichi            | 2007        | 0.99<br>(0.94–1.03) |
| Aichi            | 2008        | 1.0<br>(0.97–1.04)  |
| Aichi            | 2009        | 0.98<br>(0.93–1.02) |
| Aichi            | 2010        | 0.99<br>(0.95–1.04) |
| Aichi            | 2011        | 1.0<br>(0.97–1.03)  |
| Aichi            | 2012        | 1.01<br>(0.96–1.06) |
| Aichi            | 2013        | 0.99<br>(0.93–1.04) |
| Aichi            | 2014        | 0.99<br>(0.95–1.04) |
| Aichi            | 2015        | 0.97<br>(0.93–1.02) |
| Aichi            | 2016        | 0.97<br>(0.86–1.09) |
| Aichi            | 2017        | 0.96<br>(0.81–1.13) |
| Akita            | 1950        | 1.61<br>(1.33–1.93) |
| Akita            | 1951        | 1.59<br>(1.31–1.89) |
| Akita            | 1952        | 1.41<br>(1.17–1.67) |
| Akita            | 1953        | 1.42<br>(1.18–1.67) |
| Akita            | 1954        | 1.37<br>(1.15–1.61) |
| Akita            | 1955        | 1.26<br>(1.07–1.48) |
| Akita            | 1956        | 1.33<br>(1.12–1.55) |
| Akita            | 1957        | 1.37<br>(1.16–1.59) |
| Akita            | 1958        | 1.3<br>(1.1–1.51)   |
| Akita            | 1959        | 1.31<br>(1.11–1.53) |
| Akita            | 1960        | 1.28<br>(1.07–1.49) |
| Akita            | 1961        | 1.27<br>(1.07–1.49) |
| Akita            | 1962        | 1.27<br>(1.05–1.51) |
| Akita            | 1963        | 1.19<br>(0.97–1.41) |
| Akita            | 1964        | 1.14<br>(0.93–1.36) |
| Akita            | 1965        | 1.1<br>(0.89–1.32)  |
| Akita            | 1966        | 1.05<br>(0.86–1.25) |
| Akita            | 1967        | 1.15<br>(0.95–1.37) |
| Akita            | 1968        | 1.07<br>(0.89–1.27) |

**Table 15 Ratio of adjusted to unadjusted 5q0 values for scaled locations by year**

| <b>Geography</b> | <b>Year</b> | <b>Ratio</b>        |
|------------------|-------------|---------------------|
| Akita            | 1969        | 1.12<br>(0.94–1.31) |
| Akita            | 1970        | 1.13<br>(0.95–1.32) |
| Akita            | 1971        | 1.11<br>(0.95–1.3)  |
| Akita            | 1972        | 1.11<br>(0.96–1.29) |
| Akita            | 1973        | 1.15<br>(1.0–1.32)  |
| Akita            | 1974        | 1.11<br>(0.98–1.26) |
| Akita            | 1975        | 1.07<br>(0.95–1.19) |
| Akita            | 1976        | 1.05<br>(0.95–1.16) |
| Akita            | 1977        | 1.04<br>(0.96–1.12) |
| Akita            | 1978        | 1.03<br>(0.97–1.09) |
| Akita            | 1979        | 1.01<br>(0.97–1.05) |
| Akita            | 1980        | 1.0<br>(0.98–1.03)  |
| Akita            | 1981        | 1.01<br>(0.99–1.04) |
| Akita            | 1982        | 1.0<br>(0.97–1.02)  |
| Akita            | 1983        | 1.0<br>(0.97–1.02)  |
| Akita            | 1984        | 1.01<br>(0.98–1.03) |
| Akita            | 1985        | 0.98<br>(0.95–1.01) |
| Akita            | 1986        | 0.99<br>(0.96–1.02) |
| Akita            | 1987        | 0.98<br>(0.95–1.01) |
| Akita            | 1988        | 0.98<br>(0.95–1.01) |
| Akita            | 1989        | 0.97<br>(0.94–1.0)  |
| Akita            | 1990        | 1.01<br>(0.97–1.03) |
| Akita            | 1991        | 0.99<br>(0.96–1.02) |
| Akita            | 1992        | 1.02<br>(0.99–1.05) |
| Akita            | 1993        | 1.02<br>(0.99–1.06) |
| Akita            | 1994        | 1.03<br>(0.99–1.06) |
| Akita            | 1995        | 1.03<br>(0.99–1.06) |
| Akita            | 1996        | 0.99<br>(0.96–1.02) |
| Akita            | 1997        | 0.99<br>(0.96–1.03) |
| Akita            | 1998        | 1.03<br>(1.0–1.07)  |
| Akita            | 1999        | 0.99<br>(0.96–1.03) |



**Table 15 Ratio of adjusted to unadjusted 5q0 values for scaled locations by year**

| <b>Geography</b> | <b>Year</b> | <b>Ratio</b>        |
|------------------|-------------|---------------------|
| Akita            | 2000        | 0.99<br>(0.95–1.02) |
| Akita            | 2001        | 0.97<br>(0.93–1.01) |
| Akita            | 2002        | 0.98<br>(0.94–1.02) |
| Akita            | 2003        | 0.98<br>(0.94–1.02) |
| Akita            | 2004        | 0.98<br>(0.94–1.02) |
| Akita            | 2005        | 0.99<br>(0.95–1.03) |
| Akita            | 2006        | 0.99<br>(0.95–1.03) |
| Akita            | 2007        | 0.99<br>(0.94–1.03) |
| Akita            | 2008        | 1.0<br>(0.97–1.04)  |
| Akita            | 2009        | 0.98<br>(0.93–1.02) |
| Akita            | 2010        | 0.99<br>(0.95–1.04) |
| Akita            | 2011        | 1.0<br>(0.97–1.03)  |
| Akita            | 2012        | 1.01<br>(0.96–1.06) |
| Akita            | 2013        | 0.99<br>(0.93–1.04) |
| Akita            | 2014        | 0.99<br>(0.95–1.04) |
| Akita            | 2015        | 0.97<br>(0.93–1.02) |
| Akita            | 2016        | 0.97<br>(0.86–1.09) |
| Akita            | 2017        | 0.96<br>(0.81–1.13) |
| Aomori           | 1950        | 1.61<br>(1.33–1.92) |
| Aomori           | 1951        | 1.58<br>(1.3–1.89)  |
| Aomori           | 1952        | 1.41<br>(1.17–1.67) |
| Aomori           | 1953        | 1.42<br>(1.18–1.67) |
| Aomori           | 1954        | 1.37<br>(1.15–1.61) |
| Aomori           | 1955        | 1.26<br>(1.07–1.48) |
| Aomori           | 1956        | 1.33<br>(1.12–1.55) |
| Aomori           | 1957        | 1.37<br>(1.16–1.59) |
| Aomori           | 1958        | 1.3<br>(1.1–1.51)   |
| Aomori           | 1959        | 1.31<br>(1.11–1.53) |
| Aomori           | 1960        | 1.28<br>(1.07–1.49) |
| Aomori           | 1961        | 1.27<br>(1.07–1.49) |
| Aomori           | 1962        | 1.27<br>(1.05–1.51) |

**Table 15 Ratio of adjusted to unadjusted 5q0 values for scaled locations by year**

| <b>Geography</b> | <b>Year</b> | <b>Ratio</b>        |
|------------------|-------------|---------------------|
| Aomori           | 1963        | 1.19<br>(0.97–1.41) |
| Aomori           | 1964        | 1.14<br>(0.93–1.36) |
| Aomori           | 1965        | 1.1<br>(0.89–1.32)  |
| Aomori           | 1966        | 1.05<br>(0.86–1.25) |
| Aomori           | 1967        | 1.15<br>(0.95–1.37) |
| Aomori           | 1968        | 1.07<br>(0.89–1.27) |
| Aomori           | 1969        | 1.12<br>(0.94–1.31) |
| Aomori           | 1970        | 1.13<br>(0.95–1.32) |
| Aomori           | 1971        | 1.11<br>(0.95–1.29) |
| Aomori           | 1972        | 1.11<br>(0.96–1.29) |
| Aomori           | 1973        | 1.15<br>(1.0–1.32)  |
| Aomori           | 1974        | 1.11<br>(0.98–1.26) |
| Aomori           | 1975        | 1.07<br>(0.95–1.19) |
| Aomori           | 1976        | 1.05<br>(0.95–1.16) |
| Aomori           | 1977        | 1.04<br>(0.96–1.12) |
| Aomori           | 1978        | 1.03<br>(0.97–1.09) |
| Aomori           | 1979        | 1.01<br>(0.97–1.05) |
| Aomori           | 1980        | 1.0<br>(0.98–1.03)  |
| Aomori           | 1981        | 1.01<br>(0.99–1.04) |
| Aomori           | 1982        | 1.0<br>(0.97–1.02)  |
| Aomori           | 1983        | 1.0<br>(0.97–1.02)  |
| Aomori           | 1984        | 1.01<br>(0.98–1.03) |
| Aomori           | 1985        | 0.98<br>(0.95–1.01) |
| Aomori           | 1986        | 0.99<br>(0.96–1.02) |
| Aomori           | 1987        | 0.98<br>(0.95–1.01) |
| Aomori           | 1988        | 0.98<br>(0.95–1.01) |
| Aomori           | 1989        | 0.97<br>(0.94–1.0)  |
| Aomori           | 1990        | 1.01<br>(0.97–1.03) |
| Aomori           | 1991        | 0.99<br>(0.96–1.02) |
| Aomori           | 1992        | 1.02<br>(0.99–1.05) |
| Aomori           | 1993        | 1.02<br>(0.99–1.06) |

**Table 15 Ratio of adjusted to unadjusted 5q0 values for scaled locations by year**

| <b>Geography</b> | <b>Year</b> | <b>Ratio</b>        |
|------------------|-------------|---------------------|
| Aomori           | 1994        | 1.03<br>(0.99–1.06) |
| Aomori           | 1995        | 1.03<br>(0.99–1.06) |
| Aomori           | 1996        | 0.99<br>(0.96–1.02) |
| Aomori           | 1997        | 0.99<br>(0.96–1.03) |
| Aomori           | 1998        | 1.03<br>(1.0–1.07)  |
| Aomori           | 1999        | 0.99<br>(0.96–1.03) |
| Aomori           | 2000        | 0.99<br>(0.95–1.02) |
| Aomori           | 2001        | 0.97<br>(0.93–1.01) |
| Aomori           | 2002        | 0.98<br>(0.94–1.02) |
| Aomori           | 2003        | 0.98<br>(0.94–1.02) |
| Aomori           | 2004        | 0.98<br>(0.94–1.02) |
| Aomori           | 2005        | 0.99<br>(0.95–1.03) |
| Aomori           | 2006        | 0.99<br>(0.95–1.03) |
| Aomori           | 2007        | 0.99<br>(0.94–1.03) |
| Aomori           | 2008        | 1.0<br>(0.97–1.04)  |
| Aomori           | 2009        | 0.98<br>(0.93–1.02) |
| Aomori           | 2010        | 0.99<br>(0.95–1.04) |
| Aomori           | 2011        | 1.0<br>(0.97–1.03)  |
| Aomori           | 2012        | 1.01<br>(0.96–1.06) |
| Aomori           | 2013        | 0.99<br>(0.93–1.04) |
| Aomori           | 2014        | 0.99<br>(0.95–1.04) |
| Aomori           | 2015        | 0.97<br>(0.93–1.02) |
| Aomori           | 2016        | 0.97<br>(0.86–1.09) |
| Aomori           | 2017        | 0.96<br>(0.81–1.13) |
| Chiba            | 1950        | 1.61<br>(1.33–1.93) |
| Chiba            | 1951        | 1.59<br>(1.31–1.9)  |
| Chiba            | 1952        | 1.41<br>(1.17–1.67) |
| Chiba            | 1953        | 1.42<br>(1.18–1.68) |
| Chiba            | 1954        | 1.37<br>(1.15–1.61) |
| Chiba            | 1955        | 1.27<br>(1.07–1.48) |
| Chiba            | 1956        | 1.33<br>(1.12–1.56) |

**Table 15 Ratio of adjusted to unadjusted 5q0 values for scaled locations by year**

| <b>Geography</b> | <b>Year</b> | <b>Ratio</b>        |
|------------------|-------------|---------------------|
| Chiba            | 1957        | 1.37<br>(1.16–1.6)  |
| Chiba            | 1958        | 1.3<br>(1.1–1.52)   |
| Chiba            | 1959        | 1.31<br>(1.11–1.53) |
| Chiba            | 1960        | 1.28<br>(1.07–1.49) |
| Chiba            | 1961        | 1.27<br>(1.07–1.5)  |
| Chiba            | 1962        | 1.27<br>(1.05–1.51) |
| Chiba            | 1963        | 1.19<br>(0.97–1.41) |
| Chiba            | 1964        | 1.14<br>(0.93–1.36) |
| Chiba            | 1965        | 1.1<br>(0.89–1.32)  |
| Chiba            | 1966        | 1.05<br>(0.86–1.25) |
| Chiba            | 1967        | 1.15<br>(0.95–1.37) |
| Chiba            | 1968        | 1.07<br>(0.89–1.27) |
| Chiba            | 1969        | 1.12<br>(0.94–1.31) |
| Chiba            | 1970        | 1.13<br>(0.95–1.32) |
| Chiba            | 1971        | 1.11<br>(0.95–1.3)  |
| Chiba            | 1972        | 1.11<br>(0.95–1.29) |
| Chiba            | 1973        | 1.15<br>(1.0–1.32)  |
| Chiba            | 1974        | 1.11<br>(0.98–1.26) |
| Chiba            | 1975        | 1.07<br>(0.95–1.19) |
| Chiba            | 1976        | 1.05<br>(0.95–1.16) |
| Chiba            | 1977        | 1.04<br>(0.96–1.12) |
| Chiba            | 1978        | 1.03<br>(0.97–1.09) |
| Chiba            | 1979        | 1.01<br>(0.97–1.05) |
| Chiba            | 1980        | 1.0<br>(0.98–1.03)  |
| Chiba            | 1981        | 1.01<br>(0.99–1.04) |
| Chiba            | 1982        | 1.0<br>(0.97–1.02)  |
| Chiba            | 1983        | 1.0<br>(0.97–1.02)  |
| Chiba            | 1984        | 1.01<br>(0.98–1.03) |
| Chiba            | 1985        | 0.98<br>(0.95–1.01) |
| Chiba            | 1986        | 0.99<br>(0.96–1.02) |
| Chiba            | 1987        | 0.98<br>(0.95–1.01) |

**Table 15 Ratio of adjusted to unadjusted 5q0 values for scaled locations by year**

| <b>Geography</b> | <b>Year</b> | <b>Ratio</b>        |
|------------------|-------------|---------------------|
| Chiba            | 1988        | 0.98<br>(0.95–1.01) |
| Chiba            | 1989        | 0.97<br>(0.94–1.0)  |
| Chiba            | 1990        | 1.01<br>(0.97–1.04) |
| Chiba            | 1991        | 0.99<br>(0.96–1.02) |
| Chiba            | 1992        | 1.02<br>(0.99–1.05) |
| Chiba            | 1993        | 1.02<br>(0.99–1.06) |
| Chiba            | 1994        | 1.03<br>(0.99–1.06) |
| Chiba            | 1995        | 1.03<br>(0.99–1.06) |
| Chiba            | 1996        | 0.99<br>(0.96–1.02) |
| Chiba            | 1997        | 0.99<br>(0.96–1.03) |
| Chiba            | 1998        | 1.03<br>(1.0–1.07)  |
| Chiba            | 1999        | 0.99<br>(0.96–1.03) |
| Chiba            | 2000        | 0.99<br>(0.95–1.02) |
| Chiba            | 2001        | 0.97<br>(0.93–1.01) |
| Chiba            | 2002        | 0.98<br>(0.94–1.02) |
| Chiba            | 2003        | 0.98<br>(0.94–1.02) |
| Chiba            | 2004        | 0.98<br>(0.94–1.02) |
| Chiba            | 2005        | 0.99<br>(0.95–1.03) |
| Chiba            | 2006        | 0.99<br>(0.95–1.03) |
| Chiba            | 2007        | 0.99<br>(0.94–1.03) |
| Chiba            | 2008        | 1.0<br>(0.97–1.04)  |
| Chiba            | 2009        | 0.98<br>(0.93–1.02) |
| Chiba            | 2010        | 0.99<br>(0.95–1.04) |
| Chiba            | 2011        | 1.0<br>(0.97–1.03)  |
| Chiba            | 2012        | 1.01<br>(0.96–1.06) |
| Chiba            | 2013        | 0.99<br>(0.93–1.04) |
| Chiba            | 2014        | 0.99<br>(0.95–1.04) |
| Chiba            | 2015        | 0.97<br>(0.93–1.02) |
| Chiba            | 2016        | 0.97<br>(0.86–1.09) |
| Chiba            | 2017        | 0.96<br>(0.81–1.13) |
| Ehime            | 1950        | 1.61<br>(1.33–1.93) |

**Table 15 Ratio of adjusted to unadjusted 5q0 values for scaled locations by year**

| <b>Geography</b> | <b>Year</b> | <b>Ratio</b>        |
|------------------|-------------|---------------------|
| Ehime            | 1951        | 1.59<br>(1.31–1.89) |
| Ehime            | 1952        | 1.41<br>(1.17–1.67) |
| Ehime            | 1953        | 1.42<br>(1.18–1.67) |
| Ehime            | 1954        | 1.37<br>(1.15–1.61) |
| Ehime            | 1955        | 1.26<br>(1.07–1.48) |
| Ehime            | 1956        | 1.33<br>(1.12–1.55) |
| Ehime            | 1957        | 1.37<br>(1.16–1.59) |
| Ehime            | 1958        | 1.3<br>(1.1–1.51)   |
| Ehime            | 1959        | 1.31<br>(1.11–1.53) |
| Ehime            | 1960        | 1.28<br>(1.07–1.49) |
| Ehime            | 1961        | 1.27<br>(1.07–1.49) |
| Ehime            | 1962        | 1.27<br>(1.05–1.51) |
| Ehime            | 1963        | 1.19<br>(0.97–1.41) |
| Ehime            | 1964        | 1.14<br>(0.93–1.36) |
| Ehime            | 1965        | 1.1<br>(0.89–1.32)  |
| Ehime            | 1966        | 1.05<br>(0.86–1.25) |
| Ehime            | 1967        | 1.15<br>(0.95–1.37) |
| Ehime            | 1968        | 1.07<br>(0.89–1.27) |
| Ehime            | 1969        | 1.12<br>(0.94–1.31) |
| Ehime            | 1970        | 1.13<br>(0.95–1.32) |
| Ehime            | 1971        | 1.11<br>(0.95–1.3)  |
| Ehime            | 1972        | 1.11<br>(0.96–1.29) |
| Ehime            | 1973        | 1.15<br>(1.0–1.32)  |
| Ehime            | 1974        | 1.11<br>(0.98–1.26) |
| Ehime            | 1975        | 1.07<br>(0.95–1.19) |
| Ehime            | 1976        | 1.05<br>(0.95–1.16) |
| Ehime            | 1977        | 1.04<br>(0.96–1.12) |
| Ehime            | 1978        | 1.03<br>(0.97–1.09) |
| Ehime            | 1979        | 1.01<br>(0.97–1.05) |
| Ehime            | 1980        | 1.0<br>(0.98–1.03)  |
| Ehime            | 1981        | 1.01<br>(0.99–1.04) |

**Table 15 Ratio of adjusted to unadjusted 5q0 values for scaled locations by year**

| <b>Geography</b> | <b>Year</b> | <b>Ratio</b>        |
|------------------|-------------|---------------------|
| Ehime            | 1982        | 1.0<br>(0.97–1.02)  |
| Ehime            | 1983        | 1.0<br>(0.97–1.02)  |
| Ehime            | 1984        | 1.01<br>(0.98–1.03) |
| Ehime            | 1985        | 0.98<br>(0.95–1.01) |
| Ehime            | 1986        | 0.99<br>(0.96–1.02) |
| Ehime            | 1987        | 0.98<br>(0.95–1.01) |
| Ehime            | 1988        | 0.98<br>(0.95–1.01) |
| Ehime            | 1989        | 0.97<br>(0.94–1.0)  |
| Ehime            | 1990        | 1.01<br>(0.97–1.03) |
| Ehime            | 1991        | 0.99<br>(0.96–1.02) |
| Ehime            | 1992        | 1.02<br>(0.99–1.05) |
| Ehime            | 1993        | 1.02<br>(0.99–1.06) |
| Ehime            | 1994        | 1.03<br>(0.99–1.06) |
| Ehime            | 1995        | 1.03<br>(0.99–1.06) |
| Ehime            | 1996        | 0.99<br>(0.96–1.02) |
| Ehime            | 1997        | 0.99<br>(0.96–1.03) |
| Ehime            | 1998        | 1.03<br>(1.0–1.07)  |
| Ehime            | 1999        | 0.99<br>(0.96–1.03) |
| Ehime            | 2000        | 0.99<br>(0.95–1.02) |
| Ehime            | 2001        | 0.97<br>(0.93–1.01) |
| Ehime            | 2002        | 0.98<br>(0.94–1.02) |
| Ehime            | 2003        | 0.98<br>(0.94–1.02) |
| Ehime            | 2004        | 0.98<br>(0.94–1.02) |
| Ehime            | 2005        | 0.99<br>(0.95–1.03) |
| Ehime            | 2006        | 0.99<br>(0.95–1.03) |
| Ehime            | 2007        | 0.99<br>(0.94–1.03) |
| Ehime            | 2008        | 1.0<br>(0.97–1.04)  |
| Ehime            | 2009        | 0.98<br>(0.93–1.02) |
| Ehime            | 2010        | 0.99<br>(0.95–1.04) |
| Ehime            | 2011        | 1.0<br>(0.97–1.03)  |
| Ehime            | 2012        | 1.01<br>(0.96–1.06) |

**Table 15 Ratio of adjusted to unadjusted 5q0 values for scaled locations by year**

| <b>Geography</b> | <b>Year</b> | <b>Ratio</b>        |
|------------------|-------------|---------------------|
| Ehime            | 2013        | 0.99<br>(0.93–1.04) |
| Ehime            | 2014        | 0.99<br>(0.95–1.04) |
| Ehime            | 2015        | 0.97<br>(0.93–1.02) |
| Ehime            | 2016        | 0.97<br>(0.86–1.09) |
| Ehime            | 2017        | 0.96<br>(0.81–1.13) |
| Fukui            | 1950        | 1.62<br>(1.33–1.93) |
| Fukui            | 1951        | 1.59<br>(1.31–1.9)  |
| Fukui            | 1952        | 1.41<br>(1.17–1.67) |
| Fukui            | 1953        | 1.42<br>(1.18–1.68) |
| Fukui            | 1954        | 1.37<br>(1.15–1.61) |
| Fukui            | 1955        | 1.27<br>(1.07–1.48) |
| Fukui            | 1956        | 1.33<br>(1.12–1.56) |
| Fukui            | 1957        | 1.37<br>(1.16–1.6)  |
| Fukui            | 1958        | 1.3<br>(1.1–1.52)   |
| Fukui            | 1959        | 1.31<br>(1.11–1.53) |
| Fukui            | 1960        | 1.28<br>(1.07–1.49) |
| Fukui            | 1961        | 1.27<br>(1.07–1.5)  |
| Fukui            | 1962        | 1.27<br>(1.05–1.51) |
| Fukui            | 1963        | 1.19<br>(0.97–1.41) |
| Fukui            | 1964        | 1.14<br>(0.93–1.36) |
| Fukui            | 1965        | 1.1<br>(0.89–1.32)  |
| Fukui            | 1966        | 1.05<br>(0.86–1.25) |
| Fukui            | 1967        | 1.15<br>(0.95–1.37) |
| Fukui            | 1968        | 1.07<br>(0.89–1.27) |
| Fukui            | 1969        | 1.12<br>(0.94–1.31) |
| Fukui            | 1970        | 1.13<br>(0.95–1.32) |
| Fukui            | 1971        | 1.11<br>(0.95–1.3)  |
| Fukui            | 1972        | 1.11<br>(0.95–1.29) |
| Fukui            | 1973        | 1.15<br>(1.0–1.32)  |
| Fukui            | 1974        | 1.11<br>(0.98–1.26) |
| Fukui            | 1975        | 1.07<br>(0.95–1.19) |



**Table 15 Ratio of adjusted to unadjusted 5q0 values for scaled locations by year**

| <b>Geography</b> | <b>Year</b> | <b>Ratio</b>        |
|------------------|-------------|---------------------|
| Fukui            | 1976        | 1.05<br>(0.95–1.16) |
| Fukui            | 1977        | 1.04<br>(0.96–1.12) |
| Fukui            | 1978        | 1.03<br>(0.97–1.09) |
| Fukui            | 1979        | 1.01<br>(0.97–1.05) |
| Fukui            | 1980        | 1.0<br>(0.98–1.03)  |
| Fukui            | 1981        | 1.01<br>(0.99–1.04) |
| Fukui            | 1982        | 1.0<br>(0.97–1.02)  |
| Fukui            | 1983        | 1.0<br>(0.97–1.02)  |
| Fukui            | 1984        | 1.01<br>(0.98–1.03) |
| Fukui            | 1985        | 0.98<br>(0.95–1.01) |
| Fukui            | 1986        | 0.99<br>(0.96–1.02) |
| Fukui            | 1987        | 0.98<br>(0.95–1.01) |
| Fukui            | 1988        | 0.98<br>(0.95–1.01) |
| Fukui            | 1989        | 0.97<br>(0.94–1.0)  |
| Fukui            | 1990        | 1.01<br>(0.97–1.03) |
| Fukui            | 1991        | 0.99<br>(0.96–1.02) |
| Fukui            | 1992        | 1.02<br>(0.99–1.05) |
| Fukui            | 1993        | 1.02<br>(0.99–1.06) |
| Fukui            | 1994        | 1.03<br>(0.99–1.06) |
| Fukui            | 1995        | 1.03<br>(0.99–1.06) |
| Fukui            | 1996        | 0.99<br>(0.96–1.02) |
| Fukui            | 1997        | 0.99<br>(0.96–1.03) |
| Fukui            | 1998        | 1.03<br>(1.0–1.07)  |
| Fukui            | 1999        | 0.99<br>(0.96–1.03) |
| Fukui            | 2000        | 0.99<br>(0.95–1.02) |
| Fukui            | 2001        | 0.97<br>(0.93–1.01) |
| Fukui            | 2002        | 0.98<br>(0.94–1.02) |
| Fukui            | 2003        | 0.98<br>(0.94–1.02) |
| Fukui            | 2004        | 0.98<br>(0.94–1.02) |
| Fukui            | 2005        | 0.99<br>(0.95–1.03) |
| Fukui            | 2006        | 0.99<br>(0.95–1.03) |

**Table 15 Ratio of adjusted to unadjusted 5q0 values for scaled locations by year**

| <b>Geography</b> | <b>Year</b> | <b>Ratio</b>        |
|------------------|-------------|---------------------|
| Fukui            | 2007        | 0.99<br>(0.94–1.03) |
| Fukui            | 2008        | 1.0<br>(0.97–1.04)  |
| Fukui            | 2009        | 0.98<br>(0.93–1.02) |
| Fukui            | 2010        | 0.99<br>(0.95–1.04) |
| Fukui            | 2011        | 1.0<br>(0.97–1.03)  |
| Fukui            | 2012        | 1.01<br>(0.96–1.06) |
| Fukui            | 2013        | 0.99<br>(0.93–1.04) |
| Fukui            | 2014        | 0.99<br>(0.95–1.04) |
| Fukui            | 2015        | 0.97<br>(0.93–1.02) |
| Fukui            | 2016        | 0.97<br>(0.86–1.09) |
| Fukui            | 2017        | 0.96<br>(0.81–1.13) |
| Fukuoka          | 1950        | 1.61<br>(1.33–1.93) |
| Fukuoka          | 1951        | 1.59<br>(1.31–1.9)  |
| Fukuoka          | 1952        | 1.41<br>(1.17–1.67) |
| Fukuoka          | 1953        | 1.42<br>(1.18–1.68) |
| Fukuoka          | 1954        | 1.37<br>(1.15–1.61) |
| Fukuoka          | 1955        | 1.27<br>(1.07–1.48) |
| Fukuoka          | 1956        | 1.33<br>(1.12–1.56) |
| Fukuoka          | 1957        | 1.37<br>(1.16–1.6)  |
| Fukuoka          | 1958        | 1.3<br>(1.1–1.52)   |
| Fukuoka          | 1959        | 1.31<br>(1.11–1.53) |
| Fukuoka          | 1960        | 1.28<br>(1.07–1.49) |
| Fukuoka          | 1961        | 1.27<br>(1.07–1.5)  |
| Fukuoka          | 1962        | 1.27<br>(1.05–1.51) |
| Fukuoka          | 1963        | 1.19<br>(0.97–1.41) |
| Fukuoka          | 1964        | 1.14<br>(0.93–1.36) |
| Fukuoka          | 1965        | 1.1<br>(0.89–1.32)  |
| Fukuoka          | 1966        | 1.05<br>(0.86–1.25) |
| Fukuoka          | 1967        | 1.15<br>(0.95–1.37) |
| Fukuoka          | 1968        | 1.07<br>(0.89–1.27) |
| Fukuoka          | 1969        | 1.12<br>(0.94–1.31) |

**Table 15 Ratio of adjusted to unadjusted 5q0 values for scaled locations by year**

| <b>Geography</b> | <b>Year</b> | <b>Ratio</b>        |
|------------------|-------------|---------------------|
| Fukuoka          | 1970        | 1.13<br>(0.95–1.32) |
| Fukuoka          | 1971        | 1.11<br>(0.95–1.3)  |
| Fukuoka          | 1972        | 1.11<br>(0.95–1.29) |
| Fukuoka          | 1973        | 1.15<br>(1.0–1.32)  |
| Fukuoka          | 1974        | 1.11<br>(0.98–1.26) |
| Fukuoka          | 1975        | 1.07<br>(0.95–1.19) |
| Fukuoka          | 1976        | 1.05<br>(0.95–1.16) |
| Fukuoka          | 1977        | 1.04<br>(0.96–1.12) |
| Fukuoka          | 1978        | 1.03<br>(0.97–1.09) |
| Fukuoka          | 1979        | 1.01<br>(0.97–1.05) |
| Fukuoka          | 1980        | 1.0<br>(0.98–1.03)  |
| Fukuoka          | 1981        | 1.01<br>(0.99–1.04) |
| Fukuoka          | 1982        | 1.0<br>(0.97–1.02)  |
| Fukuoka          | 1983        | 1.0<br>(0.97–1.02)  |
| Fukuoka          | 1984        | 1.01<br>(0.98–1.03) |
| Fukuoka          | 1985        | 0.98<br>(0.95–1.01) |
| Fukuoka          | 1986        | 0.99<br>(0.96–1.02) |
| Fukuoka          | 1987        | 0.98<br>(0.95–1.01) |
| Fukuoka          | 1988        | 0.98<br>(0.95–1.01) |
| Fukuoka          | 1989        | 0.97<br>(0.94–1.0)  |
| Fukuoka          | 1990        | 1.01<br>(0.97–1.03) |
| Fukuoka          | 1991        | 0.99<br>(0.96–1.02) |
| Fukuoka          | 1992        | 1.02<br>(0.99–1.05) |
| Fukuoka          | 1993        | 1.02<br>(0.99–1.06) |
| Fukuoka          | 1994        | 1.03<br>(0.99–1.06) |
| Fukuoka          | 1995        | 1.03<br>(0.99–1.06) |
| Fukuoka          | 1996        | 0.99<br>(0.96–1.02) |
| Fukuoka          | 1997        | 0.99<br>(0.96–1.03) |
| Fukuoka          | 1998        | 1.03<br>(1.0–1.07)  |
| Fukuoka          | 1999        | 0.99<br>(0.96–1.03) |
| Fukuoka          | 2000        | 0.99<br>(0.95–1.02) |

**Table 15 Ratio of adjusted to unadjusted 5q0 values for scaled locations by year**

| <b>Geography</b> | <b>Year</b> | <b>Ratio</b>        |
|------------------|-------------|---------------------|
| Fukuoka          | 2001        | 0.97<br>(0.93–1.01) |
| Fukuoka          | 2002        | 0.98<br>(0.94–1.02) |
| Fukuoka          | 2003        | 0.98<br>(0.94–1.02) |
| Fukuoka          | 2004        | 0.98<br>(0.94–1.02) |
| Fukuoka          | 2005        | 0.99<br>(0.95–1.03) |
| Fukuoka          | 2006        | 0.99<br>(0.95–1.03) |
| Fukuoka          | 2007        | 0.99<br>(0.94–1.03) |
| Fukuoka          | 2008        | 1.0<br>(0.97–1.04)  |
| Fukuoka          | 2009        | 0.98<br>(0.93–1.02) |
| Fukuoka          | 2010        | 0.99<br>(0.95–1.04) |
| Fukuoka          | 2011        | 1.0<br>(0.97–1.03)  |
| Fukuoka          | 2012        | 1.01<br>(0.96–1.06) |
| Fukuoka          | 2013        | 0.99<br>(0.93–1.04) |
| Fukuoka          | 2014        | 0.99<br>(0.95–1.04) |
| Fukuoka          | 2015        | 0.97<br>(0.93–1.02) |
| Fukuoka          | 2016        | 0.97<br>(0.86–1.09) |
| Fukuoka          | 2017        | 0.96<br>(0.81–1.13) |
| Fukushima        | 1950        | 1.61<br>(1.32–1.92) |
| Fukushima        | 1951        | 1.58<br>(1.3–1.89)  |
| Fukushima        | 1952        | 1.41<br>(1.17–1.67) |
| Fukushima        | 1953        | 1.42<br>(1.18–1.67) |
| Fukushima        | 1954        | 1.37<br>(1.15–1.61) |
| Fukushima        | 1955        | 1.26<br>(1.07–1.48) |
| Fukushima        | 1956        | 1.32<br>(1.12–1.55) |
| Fukushima        | 1957        | 1.37<br>(1.16–1.59) |
| Fukushima        | 1958        | 1.3<br>(1.1–1.51)   |
| Fukushima        | 1959        | 1.31<br>(1.11–1.53) |
| Fukushima        | 1960        | 1.28<br>(1.07–1.49) |
| Fukushima        | 1961        | 1.27<br>(1.07–1.49) |
| Fukushima        | 1962        | 1.27<br>(1.05–1.51) |
| Fukushima        | 1963        | 1.19<br>(0.97–1.41) |

**Table 15 Ratio of adjusted to unadjusted 5q0 values for scaled locations by year**

| <b>Geography</b> | <b>Year</b> | <b>Ratio</b>        |
|------------------|-------------|---------------------|
| Fukushima        | 1964        | 1.14<br>(0.93–1.36) |
| Fukushima        | 1965        | 1.1<br>(0.89–1.32)  |
| Fukushima        | 1966        | 1.05<br>(0.86–1.25) |
| Fukushima        | 1967        | 1.15<br>(0.95–1.37) |
| Fukushima        | 1968        | 1.07<br>(0.89–1.27) |
| Fukushima        | 1969        | 1.12<br>(0.94–1.31) |
| Fukushima        | 1970        | 1.13<br>(0.95–1.32) |
| Fukushima        | 1971        | 1.11<br>(0.95–1.29) |
| Fukushima        | 1972        | 1.11<br>(0.96–1.29) |
| Fukushima        | 1973        | 1.15<br>(1.0–1.32)  |
| Fukushima        | 1974        | 1.11<br>(0.98–1.26) |
| Fukushima        | 1975        | 1.07<br>(0.95–1.19) |
| Fukushima        | 1976        | 1.05<br>(0.95–1.16) |
| Fukushima        | 1977        | 1.04<br>(0.96–1.12) |
| Fukushima        | 1978        | 1.03<br>(0.97–1.09) |
| Fukushima        | 1979        | 1.01<br>(0.97–1.05) |
| Fukushima        | 1980        | 1.0<br>(0.98–1.03)  |
| Fukushima        | 1981        | 1.01<br>(0.99–1.04) |
| Fukushima        | 1982        | 1.0<br>(0.97–1.02)  |
| Fukushima        | 1983        | 1.0<br>(0.97–1.02)  |
| Fukushima        | 1984        | 1.01<br>(0.98–1.03) |
| Fukushima        | 1985        | 0.98<br>(0.95–1.01) |
| Fukushima        | 1986        | 0.99<br>(0.96–1.02) |
| Fukushima        | 1987        | 0.98<br>(0.95–1.01) |
| Fukushima        | 1988        | 0.98<br>(0.95–1.01) |
| Fukushima        | 1989        | 0.97<br>(0.94–1.0)  |
| Fukushima        | 1990        | 1.01<br>(0.97–1.03) |
| Fukushima        | 1991        | 0.99<br>(0.96–1.02) |
| Fukushima        | 1992        | 1.02<br>(0.99–1.05) |
| Fukushima        | 1993        | 1.02<br>(0.99–1.06) |
| Fukushima        | 1994        | 1.03<br>(0.99–1.06) |

**Table 15 Ratio of adjusted to unadjusted 5q0 values for scaled locations by year**

| <b>Geography</b> | <b>Year</b> | <b>Ratio</b>        |
|------------------|-------------|---------------------|
| Fukushima        | 1995        | 1.03<br>(0.99–1.06) |
| Fukushima        | 1996        | 0.99<br>(0.96–1.02) |
| Fukushima        | 1997        | 0.99<br>(0.96–1.03) |
| Fukushima        | 1998        | 1.03<br>(1.0–1.07)  |
| Fukushima        | 1999        | 0.99<br>(0.96–1.03) |
| Fukushima        | 2000        | 0.99<br>(0.95–1.02) |
| Fukushima        | 2001        | 0.97<br>(0.93–1.01) |
| Fukushima        | 2002        | 0.98<br>(0.94–1.02) |
| Fukushima        | 2003        | 0.98<br>(0.94–1.02) |
| Fukushima        | 2004        | 0.98<br>(0.94–1.02) |
| Fukushima        | 2005        | 0.99<br>(0.95–1.03) |
| Fukushima        | 2006        | 0.99<br>(0.95–1.03) |
| Fukushima        | 2007        | 0.99<br>(0.94–1.03) |
| Fukushima        | 2008        | 1.0<br>(0.97–1.04)  |
| Fukushima        | 2009        | 0.98<br>(0.93–1.02) |
| Fukushima        | 2010        | 0.99<br>(0.95–1.04) |
| Fukushima        | 2011        | 1.0<br>(0.97–1.03)  |
| Fukushima        | 2012        | 1.01<br>(0.96–1.06) |
| Fukushima        | 2013        | 0.99<br>(0.93–1.04) |
| Fukushima        | 2014        | 0.99<br>(0.95–1.04) |
| Fukushima        | 2015        | 0.97<br>(0.93–1.02) |
| Fukushima        | 2016        | 0.97<br>(0.86–1.09) |
| Fukushima        | 2017        | 0.96<br>(0.81–1.13) |
| Gifu             | 1950        | 1.61<br>(1.33–1.93) |
| Gifu             | 1951        | 1.59<br>(1.31–1.9)  |
| Gifu             | 1952        | 1.41<br>(1.17–1.67) |
| Gifu             | 1953        | 1.42<br>(1.18–1.67) |
| Gifu             | 1954        | 1.37<br>(1.15–1.61) |
| Gifu             | 1955        | 1.26<br>(1.07–1.48) |
| Gifu             | 1956        | 1.33<br>(1.12–1.55) |
| Gifu             | 1957        | 1.37<br>(1.16–1.59) |

**Table 15 Ratio of adjusted to unadjusted 5q0 values for scaled locations by year**

| <b>Geography</b> | <b>Year</b> | <b>Ratio</b>        |
|------------------|-------------|---------------------|
| Gifu             | 1958        | 1.3<br>(1.1–1.51)   |
| Gifu             | 1959        | 1.31<br>(1.11–1.53) |
| Gifu             | 1960        | 1.28<br>(1.07–1.49) |
| Gifu             | 1961        | 1.27<br>(1.07–1.5)  |
| Gifu             | 1962        | 1.27<br>(1.05–1.51) |
| Gifu             | 1963        | 1.19<br>(0.97–1.41) |
| Gifu             | 1964        | 1.14<br>(0.93–1.36) |
| Gifu             | 1965        | 1.1<br>(0.89–1.32)  |
| Gifu             | 1966        | 1.05<br>(0.86–1.25) |
| Gifu             | 1967        | 1.15<br>(0.95–1.37) |
| Gifu             | 1968        | 1.07<br>(0.89–1.27) |
| Gifu             | 1969        | 1.12<br>(0.94–1.31) |
| Gifu             | 1970        | 1.13<br>(0.95–1.32) |
| Gifu             | 1971        | 1.11<br>(0.95–1.3)  |
| Gifu             | 1972        | 1.11<br>(0.96–1.29) |
| Gifu             | 1973        | 1.15<br>(1.0–1.32)  |
| Gifu             | 1974        | 1.11<br>(0.98–1.26) |
| Gifu             | 1975        | 1.07<br>(0.95–1.19) |
| Gifu             | 1976        | 1.05<br>(0.95–1.16) |
| Gifu             | 1977        | 1.04<br>(0.96–1.12) |
| Gifu             | 1978        | 1.03<br>(0.97–1.09) |
| Gifu             | 1979        | 1.01<br>(0.97–1.05) |
| Gifu             | 1980        | 1.0<br>(0.98–1.03)  |
| Gifu             | 1981        | 1.01<br>(0.99–1.04) |
| Gifu             | 1982        | 1.0<br>(0.97–1.02)  |
| Gifu             | 1983        | 1.0<br>(0.97–1.02)  |
| Gifu             | 1984        | 1.01<br>(0.98–1.03) |
| Gifu             | 1985        | 0.98<br>(0.95–1.01) |
| Gifu             | 1986        | 0.99<br>(0.96–1.02) |
| Gifu             | 1987        | 0.98<br>(0.95–1.01) |
| Gifu             | 1988        | 0.98<br>(0.95–1.01) |

**Table 15 Ratio of adjusted to unadjusted 5q0 values for scaled locations by year**

| <b>Geography</b> | <b>Year</b> | <b>Ratio</b>        |
|------------------|-------------|---------------------|
| Gifu             | 1989        | 0.97<br>(0.94–1.0)  |
| Gifu             | 1990        | 1.01<br>(0.97–1.04) |
| Gifu             | 1991        | 0.99<br>(0.96–1.02) |
| Gifu             | 1992        | 1.02<br>(0.99–1.05) |
| Gifu             | 1993        | 1.02<br>(0.99–1.06) |
| Gifu             | 1994        | 1.03<br>(0.99–1.06) |
| Gifu             | 1995        | 1.03<br>(0.99–1.06) |
| Gifu             | 1996        | 0.99<br>(0.96–1.02) |
| Gifu             | 1997        | 0.99<br>(0.96–1.03) |
| Gifu             | 1998        | 1.03<br>(1.0–1.07)  |
| Gifu             | 1999        | 0.99<br>(0.96–1.03) |
| Gifu             | 2000        | 0.99<br>(0.95–1.02) |
| Gifu             | 2001        | 0.97<br>(0.93–1.01) |
| Gifu             | 2002        | 0.98<br>(0.94–1.02) |
| Gifu             | 2003        | 0.98<br>(0.94–1.02) |
| Gifu             | 2004        | 0.98<br>(0.94–1.02) |
| Gifu             | 2005        | 0.99<br>(0.95–1.03) |
| Gifu             | 2006        | 0.99<br>(0.95–1.03) |
| Gifu             | 2007        | 0.99<br>(0.94–1.03) |
| Gifu             | 2008        | 1.0<br>(0.97–1.04)  |
| Gifu             | 2009        | 0.98<br>(0.93–1.02) |
| Gifu             | 2010        | 0.99<br>(0.95–1.04) |
| Gifu             | 2011        | 1.0<br>(0.97–1.03)  |
| Gifu             | 2012        | 1.01<br>(0.96–1.06) |
| Gifu             | 2013        | 0.99<br>(0.93–1.04) |
| Gifu             | 2014        | 0.99<br>(0.95–1.04) |
| Gifu             | 2015        | 0.97<br>(0.93–1.02) |
| Gifu             | 2016        | 0.97<br>(0.86–1.09) |
| Gifu             | 2017        | 0.96<br>(0.81–1.13) |
| Gunma            | 1950        | 1.61<br>(1.33–1.93) |
| Gunma            | 1951        | 1.59<br>(1.31–1.9)  |



**Table 15 Ratio of adjusted to unadjusted 5q0 values for scaled locations by year**

| <b>Geography</b> | <b>Year</b> | <b>Ratio</b>        |
|------------------|-------------|---------------------|
| Gunma            | 1952        | 1.41<br>(1.17–1.67) |
| Gunma            | 1953        | 1.42<br>(1.18–1.67) |
| Gunma            | 1954        | 1.37<br>(1.15–1.61) |
| Gunma            | 1955        | 1.26<br>(1.07–1.48) |
| Gunma            | 1956        | 1.33<br>(1.12–1.55) |
| Gunma            | 1957        | 1.37<br>(1.16–1.59) |
| Gunma            | 1958        | 1.3<br>(1.1–1.51)   |
| Gunma            | 1959        | 1.31<br>(1.11–1.53) |
| Gunma            | 1960        | 1.28<br>(1.07–1.49) |
| Gunma            | 1961        | 1.27<br>(1.07–1.5)  |
| Gunma            | 1962        | 1.27<br>(1.05–1.51) |
| Gunma            | 1963        | 1.19<br>(0.97–1.41) |
| Gunma            | 1964        | 1.14<br>(0.93–1.36) |
| Gunma            | 1965        | 1.1<br>(0.89–1.32)  |
| Gunma            | 1966        | 1.05<br>(0.86–1.25) |
| Gunma            | 1967        | 1.15<br>(0.95–1.37) |
| Gunma            | 1968        | 1.07<br>(0.89–1.27) |
| Gunma            | 1969        | 1.12<br>(0.94–1.31) |
| Gunma            | 1970        | 1.13<br>(0.95–1.32) |
| Gunma            | 1971        | 1.11<br>(0.95–1.3)  |
| Gunma            | 1972        | 1.11<br>(0.96–1.29) |
| Gunma            | 1973        | 1.15<br>(1.0–1.32)  |
| Gunma            | 1974        | 1.11<br>(0.98–1.26) |
| Gunma            | 1975        | 1.07<br>(0.95–1.19) |
| Gunma            | 1976        | 1.05<br>(0.95–1.16) |
| Gunma            | 1977        | 1.04<br>(0.96–1.12) |
| Gunma            | 1978        | 1.03<br>(0.97–1.09) |
| Gunma            | 1979        | 1.01<br>(0.97–1.05) |
| Gunma            | 1980        | 1.0<br>(0.98–1.03)  |
| Gunma            | 1981        | 1.01<br>(0.99–1.04) |
| Gunma            | 1982        | 1.0<br>(0.97–1.02)  |

**Table 15 Ratio of adjusted to unadjusted 5q0 values for scaled locations by year**

| <b>Geography</b> | <b>Year</b> | <b>Ratio</b>        |
|------------------|-------------|---------------------|
| Gunma            | 1983        | 1.0<br>(0.97-1.02)  |
| Gunma            | 1984        | 1.01<br>(0.98-1.03) |
| Gunma            | 1985        | 0.98<br>(0.95-1.01) |
| Gunma            | 1986        | 0.99<br>(0.96-1.02) |
| Gunma            | 1987        | 0.98<br>(0.95-1.01) |
| Gunma            | 1988        | 0.98<br>(0.95-1.01) |
| Gunma            | 1989        | 0.97<br>(0.94-1.0)  |
| Gunma            | 1990        | 1.01<br>(0.97-1.03) |
| Gunma            | 1991        | 0.99<br>(0.96-1.02) |
| Gunma            | 1992        | 1.02<br>(0.99-1.05) |
| Gunma            | 1993        | 1.02<br>(0.99-1.06) |
| Gunma            | 1994        | 1.03<br>(0.99-1.06) |
| Gunma            | 1995        | 1.03<br>(0.99-1.06) |
| Gunma            | 1996        | 0.99<br>(0.96-1.02) |
| Gunma            | 1997        | 0.99<br>(0.96-1.03) |
| Gunma            | 1998        | 1.03<br>(1.0-1.07)  |
| Gunma            | 1999        | 0.99<br>(0.96-1.03) |
| Gunma            | 2000        | 0.99<br>(0.95-1.02) |
| Gunma            | 2001        | 0.97<br>(0.93-1.01) |
| Gunma            | 2002        | 0.98<br>(0.94-1.02) |
| Gunma            | 2003        | 0.98<br>(0.94-1.02) |
| Gunma            | 2004        | 0.98<br>(0.94-1.02) |
| Gunma            | 2005        | 0.99<br>(0.95-1.03) |
| Gunma            | 2006        | 0.99<br>(0.95-1.03) |
| Gunma            | 2007        | 0.99<br>(0.94-1.03) |
| Gunma            | 2008        | 1.0<br>(0.97-1.04)  |
| Gunma            | 2009        | 0.98<br>(0.93-1.02) |
| Gunma            | 2010        | 0.99<br>(0.95-1.04) |
| Gunma            | 2011        | 1.0<br>(0.97-1.03)  |
| Gunma            | 2012        | 1.01<br>(0.96-1.06) |
| Gunma            | 2013        | 0.99<br>(0.93-1.04) |

**Table 15 Ratio of adjusted to unadjusted 5q0 values for scaled locations by year**

| <b>Geography</b> | <b>Year</b> | <b>Ratio</b>        |
|------------------|-------------|---------------------|
| Gunma            | 2014        | 0.99<br>(0.95–1.04) |
| Gunma            | 2015        | 0.97<br>(0.93–1.02) |
| Gunma            | 2016        | 0.97<br>(0.86–1.09) |
| Gunma            | 2017        | 0.96<br>(0.81–1.13) |
| Hiroshima        | 1950        | 1.61<br>(1.33–1.93) |
| Hiroshima        | 1951        | 1.59<br>(1.31–1.89) |
| Hiroshima        | 1952        | 1.41<br>(1.17–1.67) |
| Hiroshima        | 1953        | 1.42<br>(1.18–1.67) |
| Hiroshima        | 1954        | 1.37<br>(1.15–1.61) |
| Hiroshima        | 1955        | 1.26<br>(1.07–1.48) |
| Hiroshima        | 1956        | 1.33<br>(1.12–1.55) |
| Hiroshima        | 1957        | 1.37<br>(1.16–1.6)  |
| Hiroshima        | 1958        | 1.3<br>(1.1–1.51)   |
| Hiroshima        | 1959        | 1.31<br>(1.11–1.53) |
| Hiroshima        | 1960        | 1.28<br>(1.07–1.49) |
| Hiroshima        | 1961        | 1.27<br>(1.07–1.49) |
| Hiroshima        | 1962        | 1.27<br>(1.05–1.51) |
| Hiroshima        | 1963        | 1.19<br>(0.97–1.41) |
| Hiroshima        | 1964        | 1.14<br>(0.93–1.36) |
| Hiroshima        | 1965        | 1.1<br>(0.89–1.32)  |
| Hiroshima        | 1966        | 1.05<br>(0.86–1.25) |
| Hiroshima        | 1967        | 1.15<br>(0.95–1.37) |
| Hiroshima        | 1968        | 1.07<br>(0.89–1.27) |
| Hiroshima        | 1969        | 1.12<br>(0.94–1.31) |
| Hiroshima        | 1970        | 1.13<br>(0.95–1.32) |
| Hiroshima        | 1971        | 1.11<br>(0.95–1.3)  |
| Hiroshima        | 1972        | 1.11<br>(0.96–1.29) |
| Hiroshima        | 1973        | 1.15<br>(1.0–1.32)  |
| Hiroshima        | 1974        | 1.11<br>(0.98–1.26) |
| Hiroshima        | 1975        | 1.07<br>(0.95–1.19) |
| Hiroshima        | 1976        | 1.05<br>(0.95–1.16) |

**Table 15 Ratio of adjusted to unadjusted 5q0 values for scaled locations by year**

| <b>Geography</b> | <b>Year</b> | <b>Ratio</b>        |
|------------------|-------------|---------------------|
| Hiroshima        | 1977        | 1.04<br>(0.96–1.12) |
| Hiroshima        | 1978        | 1.03<br>(0.97–1.09) |
| Hiroshima        | 1979        | 1.01<br>(0.97–1.05) |
| Hiroshima        | 1980        | 1.0<br>(0.98–1.03)  |
| Hiroshima        | 1981        | 1.01<br>(0.99–1.04) |
| Hiroshima        | 1982        | 1.0<br>(0.97–1.02)  |
| Hiroshima        | 1983        | 1.0<br>(0.97–1.02)  |
| Hiroshima        | 1984        | 1.01<br>(0.98–1.03) |
| Hiroshima        | 1985        | 0.98<br>(0.95–1.01) |
| Hiroshima        | 1986        | 0.99<br>(0.96–1.02) |
| Hiroshima        | 1987        | 0.98<br>(0.95–1.01) |
| Hiroshima        | 1988        | 0.98<br>(0.95–1.01) |
| Hiroshima        | 1989        | 0.97<br>(0.94–1.0)  |
| Hiroshima        | 1990        | 1.01<br>(0.97–1.03) |
| Hiroshima        | 1991        | 0.99<br>(0.96–1.02) |
| Hiroshima        | 1992        | 1.02<br>(0.99–1.05) |
| Hiroshima        | 1993        | 1.02<br>(0.99–1.06) |
| Hiroshima        | 1994        | 1.03<br>(0.99–1.06) |
| Hiroshima        | 1995        | 1.03<br>(0.99–1.06) |
| Hiroshima        | 1996        | 0.99<br>(0.96–1.02) |
| Hiroshima        | 1997        | 0.99<br>(0.96–1.03) |
| Hiroshima        | 1998        | 1.03<br>(1.0–1.07)  |
| Hiroshima        | 1999        | 0.99<br>(0.96–1.03) |
| Hiroshima        | 2000        | 0.99<br>(0.95–1.02) |
| Hiroshima        | 2001        | 0.97<br>(0.93–1.01) |
| Hiroshima        | 2002        | 0.98<br>(0.94–1.02) |
| Hiroshima        | 2003        | 0.98<br>(0.94–1.02) |
| Hiroshima        | 2004        | 0.98<br>(0.94–1.02) |
| Hiroshima        | 2005        | 0.99<br>(0.95–1.03) |
| Hiroshima        | 2006        | 0.99<br>(0.95–1.03) |
| Hiroshima        | 2007        | 0.99<br>(0.94–1.03) |

**Table 15 Ratio of adjusted to unadjusted 5q0 values for scaled locations by year**

| <b>Geography</b> | <b>Year</b> | <b>Ratio</b>        |
|------------------|-------------|---------------------|
| Hiroshima        | 2008        | 1.0<br>(0.97–1.04)  |
| Hiroshima        | 2009        | 0.98<br>(0.93–1.02) |
| Hiroshima        | 2010        | 0.99<br>(0.95–1.04) |
| Hiroshima        | 2011        | 1.0<br>(0.97–1.03)  |
| Hiroshima        | 2012        | 1.01<br>(0.96–1.06) |
| Hiroshima        | 2013        | 0.99<br>(0.93–1.04) |
| Hiroshima        | 2014        | 0.99<br>(0.95–1.04) |
| Hiroshima        | 2015        | 0.97<br>(0.93–1.02) |
| Hiroshima        | 2016        | 0.97<br>(0.86–1.09) |
| Hiroshima        | 2017        | 0.96<br>(0.81–1.13) |
| Hokkaidō         | 1950        | 1.61<br>(1.33–1.93) |
| Hokkaidō         | 1951        | 1.59<br>(1.31–1.89) |
| Hokkaidō         | 1952        | 1.41<br>(1.17–1.67) |
| Hokkaidō         | 1953        | 1.42<br>(1.18–1.67) |
| Hokkaidō         | 1954        | 1.37<br>(1.15–1.61) |
| Hokkaidō         | 1955        | 1.26<br>(1.07–1.48) |
| Hokkaidō         | 1956        | 1.33<br>(1.12–1.56) |
| Hokkaidō         | 1957        | 1.37<br>(1.16–1.59) |
| Hokkaidō         | 1958        | 1.3<br>(1.1–1.51)   |
| Hokkaidō         | 1959        | 1.31<br>(1.11–1.53) |
| Hokkaidō         | 1960        | 1.28<br>(1.07–1.49) |
| Hokkaidō         | 1961        | 1.27<br>(1.07–1.49) |
| Hokkaidō         | 1962        | 1.27<br>(1.05–1.51) |
| Hokkaidō         | 1963        | 1.19<br>(0.97–1.41) |
| Hokkaidō         | 1964        | 1.14<br>(0.93–1.36) |
| Hokkaidō         | 1965        | 1.1<br>(0.89–1.32)  |
| Hokkaidō         | 1966        | 1.05<br>(0.86–1.25) |
| Hokkaidō         | 1967        | 1.15<br>(0.95–1.37) |
| Hokkaidō         | 1968        | 1.07<br>(0.89–1.27) |
| Hokkaidō         | 1969        | 1.12<br>(0.94–1.31) |
| Hokkaidō         | 1970        | 1.13<br>(0.95–1.32) |

**Table 15 Ratio of adjusted to unadjusted 5q0 values for scaled locations by year**

| <b>Geography</b> | <b>Year</b> | <b>Ratio</b>        |
|------------------|-------------|---------------------|
| Hokkaidō         | 1971        | 1.11<br>(0.95–1.3)  |
| Hokkaidō         | 1972        | 1.11<br>(0.96–1.29) |
| Hokkaidō         | 1973        | 1.15<br>(1.0–1.32)  |
| Hokkaidō         | 1974        | 1.11<br>(0.98–1.26) |
| Hokkaidō         | 1975        | 1.07<br>(0.95–1.19) |
| Hokkaidō         | 1976        | 1.05<br>(0.95–1.16) |
| Hokkaidō         | 1977        | 1.04<br>(0.96–1.12) |
| Hokkaidō         | 1978        | 1.03<br>(0.97–1.09) |
| Hokkaidō         | 1979        | 1.01<br>(0.97–1.05) |
| Hokkaidō         | 1980        | 1.0<br>(0.98–1.03)  |
| Hokkaidō         | 1981        | 1.01<br>(0.99–1.04) |
| Hokkaidō         | 1982        | 1.0<br>(0.97–1.02)  |
| Hokkaidō         | 1983        | 1.0<br>(0.97–1.02)  |
| Hokkaidō         | 1984        | 1.01<br>(0.98–1.03) |
| Hokkaidō         | 1985        | 0.98<br>(0.95–1.01) |
| Hokkaidō         | 1986        | 0.99<br>(0.96–1.02) |
| Hokkaidō         | 1987        | 0.98<br>(0.95–1.01) |
| Hokkaidō         | 1988        | 0.98<br>(0.95–1.01) |
| Hokkaidō         | 1989        | 0.97<br>(0.94–1.0)  |
| Hokkaidō         | 1990        | 1.01<br>(0.97–1.03) |
| Hokkaidō         | 1991        | 0.99<br>(0.96–1.02) |
| Hokkaidō         | 1992        | 1.02<br>(0.99–1.05) |
| Hokkaidō         | 1993        | 1.02<br>(0.99–1.06) |
| Hokkaidō         | 1994        | 1.03<br>(0.99–1.06) |
| Hokkaidō         | 1995        | 1.03<br>(0.99–1.06) |
| Hokkaidō         | 1996        | 0.99<br>(0.96–1.02) |
| Hokkaidō         | 1997        | 0.99<br>(0.96–1.03) |
| Hokkaidō         | 1998        | 1.03<br>(1.0–1.07)  |
| Hokkaidō         | 1999        | 0.99<br>(0.96–1.03) |
| Hokkaidō         | 2000        | 0.99<br>(0.95–1.02) |
| Hokkaidō         | 2001        | 0.97<br>(0.93–1.01) |

**Table 15 Ratio of adjusted to unadjusted 5q0 values for scaled locations by year**

| <b>Geography</b> | <b>Year</b> | <b>Ratio</b>        |
|------------------|-------------|---------------------|
| Hokkaidō         | 2002        | 0.98<br>(0.94–1.02) |
| Hokkaidō         | 2003        | 0.98<br>(0.94–1.02) |
| Hokkaidō         | 2004        | 0.98<br>(0.94–1.02) |
| Hokkaidō         | 2005        | 0.99<br>(0.95–1.03) |
| Hokkaidō         | 2006        | 0.99<br>(0.95–1.03) |
| Hokkaidō         | 2007        | 0.99<br>(0.94–1.03) |
| Hokkaidō         | 2008        | 1.0<br>(0.97–1.04)  |
| Hokkaidō         | 2009        | 0.98<br>(0.93–1.02) |
| Hokkaidō         | 2010        | 0.99<br>(0.95–1.04) |
| Hokkaidō         | 2011        | 1.0<br>(0.97–1.03)  |
| Hokkaidō         | 2012        | 1.01<br>(0.96–1.06) |
| Hokkaidō         | 2013        | 0.99<br>(0.93–1.04) |
| Hokkaidō         | 2014        | 0.99<br>(0.95–1.04) |
| Hokkaidō         | 2015        | 0.97<br>(0.93–1.02) |
| Hokkaidō         | 2016        | 0.97<br>(0.86–1.09) |
| Hokkaidō         | 2017        | 0.96<br>(0.81–1.13) |
| Hyōgo            | 1950        | 1.61<br>(1.33–1.93) |
| Hyōgo            | 1951        | 1.59<br>(1.31–1.9)  |
| Hyōgo            | 1952        | 1.41<br>(1.17–1.67) |
| Hyōgo            | 1953        | 1.42<br>(1.18–1.68) |
| Hyōgo            | 1954        | 1.37<br>(1.15–1.61) |
| Hyōgo            | 1955        | 1.27<br>(1.07–1.48) |
| Hyōgo            | 1956        | 1.33<br>(1.12–1.56) |
| Hyōgo            | 1957        | 1.37<br>(1.16–1.6)  |
| Hyōgo            | 1958        | 1.3<br>(1.1–1.52)   |
| Hyōgo            | 1959        | 1.31<br>(1.11–1.53) |
| Hyōgo            | 1960        | 1.28<br>(1.07–1.49) |
| Hyōgo            | 1961        | 1.27<br>(1.07–1.5)  |
| Hyōgo            | 1962        | 1.27<br>(1.05–1.51) |
| Hyōgo            | 1963        | 1.19<br>(0.97–1.41) |
| Hyōgo            | 1964        | 1.14<br>(0.93–1.36) |

**Table 15 Ratio of adjusted to unadjusted 5q0 values for scaled locations by year**

| <b>Geography</b> | <b>Year</b> | <b>Ratio</b>        |
|------------------|-------------|---------------------|
| Hyōgo            | 1965        | 1.1<br>(0.89–1.32)  |
| Hyōgo            | 1966        | 1.05<br>(0.86–1.25) |
| Hyōgo            | 1967        | 1.15<br>(0.95–1.37) |
| Hyōgo            | 1968        | 1.07<br>(0.89–1.27) |
| Hyōgo            | 1969        | 1.12<br>(0.94–1.31) |
| Hyōgo            | 1970        | 1.13<br>(0.95–1.32) |
| Hyōgo            | 1971        | 1.11<br>(0.95–1.3)  |
| Hyōgo            | 1972        | 1.11<br>(0.95–1.29) |
| Hyōgo            | 1973        | 1.15<br>(1.0–1.32)  |
| Hyōgo            | 1974        | 1.11<br>(0.98–1.26) |
| Hyōgo            | 1975        | 1.07<br>(0.95–1.19) |
| Hyōgo            | 1976        | 1.05<br>(0.95–1.16) |
| Hyōgo            | 1977        | 1.04<br>(0.96–1.12) |
| Hyōgo            | 1978        | 1.03<br>(0.97–1.09) |
| Hyōgo            | 1979        | 1.01<br>(0.97–1.05) |
| Hyōgo            | 1980        | 1.0<br>(0.98–1.03)  |
| Hyōgo            | 1981        | 1.01<br>(0.99–1.04) |
| Hyōgo            | 1982        | 1.0<br>(0.97–1.02)  |
| Hyōgo            | 1983        | 1.0<br>(0.97–1.02)  |
| Hyōgo            | 1984        | 1.01<br>(0.98–1.03) |
| Hyōgo            | 1985        | 0.98<br>(0.95–1.01) |
| Hyōgo            | 1986        | 0.99<br>(0.96–1.02) |
| Hyōgo            | 1987        | 0.98<br>(0.95–1.01) |
| Hyōgo            | 1988        | 0.98<br>(0.95–1.01) |
| Hyōgo            | 1989        | 0.97<br>(0.94–1.0)  |
| Hyōgo            | 1990        | 1.01<br>(0.97–1.03) |
| Hyōgo            | 1991        | 0.99<br>(0.96–1.02) |
| Hyōgo            | 1992        | 1.02<br>(0.99–1.05) |
| Hyōgo            | 1993        | 1.02<br>(0.99–1.06) |
| Hyōgo            | 1994        | 1.03<br>(0.99–1.06) |
| Hyōgo            | 1995        | 1.03<br>(0.99–1.06) |



**Table 15 Ratio of adjusted to unadjusted 5q0 values for scaled locations by year**

| <b>Geography</b> | <b>Year</b> | <b>Ratio</b>        |
|------------------|-------------|---------------------|
| Hyōgo            | 1996        | 0.99<br>(0.96–1.02) |
| Hyōgo            | 1997        | 0.99<br>(0.96–1.03) |
| Hyōgo            | 1998        | 1.03<br>(1.0–1.07)  |
| Hyōgo            | 1999        | 0.99<br>(0.96–1.03) |
| Hyōgo            | 2000        | 0.99<br>(0.95–1.02) |
| Hyōgo            | 2001        | 0.97<br>(0.93–1.01) |
| Hyōgo            | 2002        | 0.98<br>(0.94–1.02) |
| Hyōgo            | 2003        | 0.98<br>(0.94–1.02) |
| Hyōgo            | 2004        | 0.98<br>(0.94–1.02) |
| Hyōgo            | 2005        | 0.99<br>(0.95–1.03) |
| Hyōgo            | 2006        | 0.99<br>(0.95–1.03) |
| Hyōgo            | 2007        | 0.99<br>(0.94–1.03) |
| Hyōgo            | 2008        | 1.0<br>(0.97–1.04)  |
| Hyōgo            | 2009        | 0.98<br>(0.93–1.02) |
| Hyōgo            | 2010        | 0.99<br>(0.95–1.04) |
| Hyōgo            | 2011        | 1.0<br>(0.97–1.03)  |
| Hyōgo            | 2012        | 1.01<br>(0.96–1.06) |
| Hyōgo            | 2013        | 0.99<br>(0.93–1.04) |
| Hyōgo            | 2014        | 0.99<br>(0.95–1.04) |
| Hyōgo            | 2015        | 0.97<br>(0.93–1.02) |
| Hyōgo            | 2016        | 0.97<br>(0.86–1.09) |
| Hyōgo            | 2017        | 0.96<br>(0.81–1.13) |
| Ibaraki          | 1950        | 1.61<br>(1.32–1.92) |
| Ibaraki          | 1951        | 1.58<br>(1.3–1.89)  |
| Ibaraki          | 1952        | 1.41<br>(1.17–1.67) |
| Ibaraki          | 1953        | 1.42<br>(1.18–1.67) |
| Ibaraki          | 1954        | 1.37<br>(1.15–1.61) |
| Ibaraki          | 1955        | 1.26<br>(1.07–1.48) |
| Ibaraki          | 1956        | 1.33<br>(1.12–1.55) |
| Ibaraki          | 1957        | 1.37<br>(1.16–1.59) |
| Ibaraki          | 1958        | 1.3<br>(1.1–1.51)   |

**Table 15 Ratio of adjusted to unadjusted 5q0 values for scaled locations by year**

| <b>Geography</b> | <b>Year</b> | <b>Ratio</b>        |
|------------------|-------------|---------------------|
| Ibaraki          | 1959        | 1.31<br>(1.11–1.53) |
| Ibaraki          | 1960        | 1.28<br>(1.07–1.49) |
| Ibaraki          | 1961        | 1.27<br>(1.07–1.49) |
| Ibaraki          | 1962        | 1.27<br>(1.05–1.51) |
| Ibaraki          | 1963        | 1.19<br>(0.97–1.41) |
| Ibaraki          | 1964        | 1.14<br>(0.93–1.36) |
| Ibaraki          | 1965        | 1.1<br>(0.89–1.32)  |
| Ibaraki          | 1966        | 1.05<br>(0.86–1.25) |
| Ibaraki          | 1967        | 1.15<br>(0.95–1.37) |
| Ibaraki          | 1968        | 1.07<br>(0.89–1.27) |
| Ibaraki          | 1969        | 1.12<br>(0.94–1.31) |
| Ibaraki          | 1970        | 1.13<br>(0.95–1.32) |
| Ibaraki          | 1971        | 1.11<br>(0.95–1.29) |
| Ibaraki          | 1972        | 1.11<br>(0.96–1.29) |
| Ibaraki          | 1973        | 1.15<br>(1.0–1.32)  |
| Ibaraki          | 1974        | 1.11<br>(0.98–1.26) |
| Ibaraki          | 1975        | 1.07<br>(0.95–1.19) |
| Ibaraki          | 1976        | 1.05<br>(0.95–1.16) |
| Ibaraki          | 1977        | 1.04<br>(0.96–1.12) |
| Ibaraki          | 1978        | 1.03<br>(0.97–1.09) |
| Ibaraki          | 1979        | 1.01<br>(0.97–1.05) |
| Ibaraki          | 1980        | 1.0<br>(0.98–1.03)  |
| Ibaraki          | 1981        | 1.01<br>(0.99–1.04) |
| Ibaraki          | 1982        | 1.0<br>(0.97–1.02)  |
| Ibaraki          | 1983        | 1.0<br>(0.97–1.02)  |
| Ibaraki          | 1984        | 1.01<br>(0.98–1.03) |
| Ibaraki          | 1985        | 0.98<br>(0.95–1.01) |
| Ibaraki          | 1986        | 0.99<br>(0.96–1.02) |
| Ibaraki          | 1987        | 0.98<br>(0.95–1.01) |
| Ibaraki          | 1988        | 0.98<br>(0.95–1.01) |
| Ibaraki          | 1989        | 0.97<br>(0.94–1.0)  |

**Table 15 Ratio of adjusted to unadjusted 5q0 values for scaled locations by year**

| <b>Geography</b> | <b>Year</b> | <b>Ratio</b>        |
|------------------|-------------|---------------------|
| Ibaraki          | 1990        | 1.01<br>(0.97–1.03) |
| Ibaraki          | 1991        | 0.99<br>(0.96–1.02) |
| Ibaraki          | 1992        | 1.02<br>(0.99–1.05) |
| Ibaraki          | 1993        | 1.02<br>(0.99–1.06) |
| Ibaraki          | 1994        | 1.03<br>(0.99–1.06) |
| Ibaraki          | 1995        | 1.03<br>(0.99–1.06) |
| Ibaraki          | 1996        | 0.99<br>(0.96–1.02) |
| Ibaraki          | 1997        | 0.99<br>(0.96–1.03) |
| Ibaraki          | 1998        | 1.03<br>(1.0–1.07)  |
| Ibaraki          | 1999        | 0.99<br>(0.96–1.03) |
| Ibaraki          | 2000        | 0.99<br>(0.95–1.02) |
| Ibaraki          | 2001        | 0.97<br>(0.93–1.01) |
| Ibaraki          | 2002        | 0.98<br>(0.94–1.02) |
| Ibaraki          | 2003        | 0.98<br>(0.94–1.02) |
| Ibaraki          | 2004        | 0.98<br>(0.94–1.02) |
| Ibaraki          | 2005        | 0.99<br>(0.95–1.03) |
| Ibaraki          | 2006        | 0.99<br>(0.95–1.03) |
| Ibaraki          | 2007        | 0.99<br>(0.94–1.03) |
| Ibaraki          | 2008        | 1.0<br>(0.97–1.04)  |
| Ibaraki          | 2009        | 0.98<br>(0.93–1.02) |
| Ibaraki          | 2010        | 0.99<br>(0.95–1.04) |
| Ibaraki          | 2011        | 1.0<br>(0.97–1.03)  |
| Ibaraki          | 2012        | 1.01<br>(0.96–1.06) |
| Ibaraki          | 2013        | 0.99<br>(0.93–1.04) |
| Ibaraki          | 2014        | 0.99<br>(0.95–1.04) |
| Ibaraki          | 2015        | 0.97<br>(0.93–1.02) |
| Ibaraki          | 2016        | 0.97<br>(0.86–1.09) |
| Ibaraki          | 2017        | 0.96<br>(0.81–1.13) |
| Ishikawa         | 1950        | 1.61<br>(1.33–1.93) |
| Ishikawa         | 1951        | 1.59<br>(1.31–1.9)  |
| Ishikawa         | 1952        | 1.41<br>(1.17–1.67) |

**Table 15 Ratio of adjusted to unadjusted 5q0 values for scaled locations by year**

| <b>Geography</b> | <b>Year</b> | <b>Ratio</b>        |
|------------------|-------------|---------------------|
| Ishikawa         | 1953        | 1.42<br>(1.18–1.67) |
| Ishikawa         | 1954        | 1.37<br>(1.15–1.61) |
| Ishikawa         | 1955        | 1.26<br>(1.07–1.48) |
| Ishikawa         | 1956        | 1.33<br>(1.12–1.55) |
| Ishikawa         | 1957        | 1.37<br>(1.16–1.6)  |
| Ishikawa         | 1958        | 1.3<br>(1.1–1.52)   |
| Ishikawa         | 1959        | 1.31<br>(1.11–1.53) |
| Ishikawa         | 1960        | 1.28<br>(1.07–1.49) |
| Ishikawa         | 1961        | 1.27<br>(1.07–1.5)  |
| Ishikawa         | 1962        | 1.27<br>(1.05–1.51) |
| Ishikawa         | 1963        | 1.19<br>(0.97–1.41) |
| Ishikawa         | 1964        | 1.14<br>(0.93–1.36) |
| Ishikawa         | 1965        | 1.1<br>(0.89–1.32)  |
| Ishikawa         | 1966        | 1.05<br>(0.86–1.25) |
| Ishikawa         | 1967        | 1.15<br>(0.95–1.37) |
| Ishikawa         | 1968        | 1.07<br>(0.89–1.27) |
| Ishikawa         | 1969        | 1.12<br>(0.94–1.31) |
| Ishikawa         | 1970        | 1.13<br>(0.95–1.32) |
| Ishikawa         | 1971        | 1.11<br>(0.95–1.3)  |
| Ishikawa         | 1972        | 1.11<br>(0.96–1.29) |
| Ishikawa         | 1973        | 1.15<br>(1.0–1.32)  |
| Ishikawa         | 1974        | 1.11<br>(0.98–1.26) |
| Ishikawa         | 1975        | 1.07<br>(0.95–1.19) |
| Ishikawa         | 1976        | 1.05<br>(0.95–1.16) |
| Ishikawa         | 1977        | 1.04<br>(0.96–1.12) |
| Ishikawa         | 1978        | 1.03<br>(0.97–1.09) |
| Ishikawa         | 1979        | 1.01<br>(0.97–1.05) |
| Ishikawa         | 1980        | 1.0<br>(0.98–1.03)  |
| Ishikawa         | 1981        | 1.01<br>(0.99–1.04) |
| Ishikawa         | 1982        | 1.0<br>(0.97–1.02)  |
| Ishikawa         | 1983        | 1.0<br>(0.97–1.02)  |

**Table 15 Ratio of adjusted to unadjusted 5q0 values for scaled locations by year**

| <b>Geography</b> | <b>Year</b> | <b>Ratio</b>        |
|------------------|-------------|---------------------|
| Ishikawa         | 1984        | 1.01<br>(0.98–1.03) |
| Ishikawa         | 1985        | 0.98<br>(0.95–1.01) |
| Ishikawa         | 1986        | 0.99<br>(0.96–1.02) |
| Ishikawa         | 1987        | 0.98<br>(0.95–1.01) |
| Ishikawa         | 1988        | 0.98<br>(0.95–1.01) |
| Ishikawa         | 1989        | 0.97<br>(0.94–1.0)  |
| Ishikawa         | 1990        | 1.01<br>(0.97–1.03) |
| Ishikawa         | 1991        | 0.99<br>(0.96–1.02) |
| Ishikawa         | 1992        | 1.02<br>(0.99–1.05) |
| Ishikawa         | 1993        | 1.02<br>(0.99–1.06) |
| Ishikawa         | 1994        | 1.03<br>(0.99–1.06) |
| Ishikawa         | 1995        | 1.03<br>(0.99–1.06) |
| Ishikawa         | 1996        | 0.99<br>(0.96–1.02) |
| Ishikawa         | 1997        | 0.99<br>(0.96–1.03) |
| Ishikawa         | 1998        | 1.03<br>(1.0–1.07)  |
| Ishikawa         | 1999        | 0.99<br>(0.96–1.03) |
| Ishikawa         | 2000        | 0.99<br>(0.95–1.02) |
| Ishikawa         | 2001        | 0.97<br>(0.93–1.01) |
| Ishikawa         | 2002        | 0.98<br>(0.94–1.02) |
| Ishikawa         | 2003        | 0.98<br>(0.94–1.02) |
| Ishikawa         | 2004        | 0.98<br>(0.94–1.02) |
| Ishikawa         | 2005        | 0.99<br>(0.95–1.03) |
| Ishikawa         | 2006        | 0.99<br>(0.95–1.03) |
| Ishikawa         | 2007        | 0.99<br>(0.94–1.03) |
| Ishikawa         | 2008        | 1.0<br>(0.97–1.04)  |
| Ishikawa         | 2009        | 0.98<br>(0.93–1.02) |
| Ishikawa         | 2010        | 0.99<br>(0.95–1.04) |
| Ishikawa         | 2011        | 1.0<br>(0.97–1.03)  |
| Ishikawa         | 2012        | 1.01<br>(0.96–1.06) |
| Ishikawa         | 2013        | 0.99<br>(0.93–1.04) |
| Ishikawa         | 2014        | 0.99<br>(0.95–1.04) |

**Table 15 Ratio of adjusted to unadjusted 5q0 values for scaled locations by year**

| <b>Geography</b> | <b>Year</b> | <b>Ratio</b>        |
|------------------|-------------|---------------------|
| Ishikawa         | 2015        | 0.97<br>(0.93–1.02) |
| Ishikawa         | 2016        | 0.97<br>(0.86–1.09) |
| Ishikawa         | 2017        | 0.96<br>(0.81–1.13) |
| Iwate            | 1950        | 1.61<br>(1.32–1.92) |
| Iwate            | 1951        | 1.58<br>(1.3–1.89)  |
| Iwate            | 1952        | 1.41<br>(1.17–1.67) |
| Iwate            | 1953        | 1.42<br>(1.18–1.67) |
| Iwate            | 1954        | 1.37<br>(1.15–1.61) |
| Iwate            | 1955        | 1.26<br>(1.07–1.48) |
| Iwate            | 1956        | 1.32<br>(1.12–1.55) |
| Iwate            | 1957        | 1.37<br>(1.16–1.59) |
| Iwate            | 1958        | 1.3<br>(1.1–1.51)   |
| Iwate            | 1959        | 1.31<br>(1.11–1.53) |
| Iwate            | 1960        | 1.28<br>(1.07–1.49) |
| Iwate            | 1961        | 1.27<br>(1.07–1.49) |
| Iwate            | 1962        | 1.26<br>(1.05–1.51) |
| Iwate            | 1963        | 1.19<br>(0.97–1.41) |
| Iwate            | 1964        | 1.14<br>(0.93–1.36) |
| Iwate            | 1965        | 1.1<br>(0.89–1.32)  |
| Iwate            | 1966        | 1.05<br>(0.86–1.25) |
| Iwate            | 1967        | 1.15<br>(0.95–1.37) |
| Iwate            | 1968        | 1.07<br>(0.89–1.27) |
| Iwate            | 1969        | 1.12<br>(0.94–1.31) |
| Iwate            | 1970        | 1.13<br>(0.95–1.32) |
| Iwate            | 1971        | 1.11<br>(0.95–1.29) |
| Iwate            | 1972        | 1.11<br>(0.96–1.29) |
| Iwate            | 1973        | 1.15<br>(1.0–1.32)  |
| Iwate            | 1974        | 1.11<br>(0.98–1.26) |
| Iwate            | 1975        | 1.07<br>(0.95–1.19) |
| Iwate            | 1976        | 1.05<br>(0.95–1.16) |
| Iwate            | 1977        | 1.04<br>(0.96–1.12) |

**Table 15 Ratio of adjusted to unadjusted 5q0 values for scaled locations by year**

| <b>Geography</b> | <b>Year</b> | <b>Ratio</b>        |
|------------------|-------------|---------------------|
| Iwate            | 1978        | 1.03<br>(0.97-1.09) |
| Iwate            | 1979        | 1.01<br>(0.97-1.05) |
| Iwate            | 1980        | 1.0<br>(0.98-1.03)  |
| Iwate            | 1981        | 1.01<br>(0.99-1.04) |
| Iwate            | 1982        | 1.0<br>(0.97-1.02)  |
| Iwate            | 1983        | 1.0<br>(0.97-1.02)  |
| Iwate            | 1984        | 1.01<br>(0.98-1.03) |
| Iwate            | 1985        | 0.98<br>(0.95-1.01) |
| Iwate            | 1986        | 0.99<br>(0.96-1.02) |
| Iwate            | 1987        | 0.98<br>(0.95-1.01) |
| Iwate            | 1988        | 0.98<br>(0.95-1.01) |
| Iwate            | 1989        | 0.97<br>(0.94-1.0)  |
| Iwate            | 1990        | 1.01<br>(0.97-1.03) |
| Iwate            | 1991        | 0.99<br>(0.96-1.02) |
| Iwate            | 1992        | 1.02<br>(0.99-1.05) |
| Iwate            | 1993        | 1.02<br>(0.99-1.06) |
| Iwate            | 1994        | 1.03<br>(0.99-1.06) |
| Iwate            | 1995        | 1.03<br>(0.99-1.06) |
| Iwate            | 1996        | 0.99<br>(0.96-1.02) |
| Iwate            | 1997        | 0.99<br>(0.96-1.03) |
| Iwate            | 1998        | 1.03<br>(1.0-1.07)  |
| Iwate            | 1999        | 0.99<br>(0.96-1.03) |
| Iwate            | 2000        | 0.99<br>(0.95-1.02) |
| Iwate            | 2001        | 0.97<br>(0.93-1.01) |
| Iwate            | 2002        | 0.98<br>(0.94-1.02) |
| Iwate            | 2003        | 0.98<br>(0.94-1.02) |
| Iwate            | 2004        | 0.98<br>(0.94-1.02) |
| Iwate            | 2005        | 0.99<br>(0.95-1.03) |
| Iwate            | 2006        | 0.99<br>(0.95-1.03) |
| Iwate            | 2007        | 0.99<br>(0.94-1.03) |
| Iwate            | 2008        | 1.0<br>(0.97-1.04)  |

**Table 15 Ratio of adjusted to unadjusted 5q0 values for scaled locations by year**

| <b>Geography</b> | <b>Year</b> | <b>Ratio</b>        |
|------------------|-------------|---------------------|
| Iwate            | 2009        | 0.98<br>(0.93–1.02) |
| Iwate            | 2010        | 0.99<br>(0.95–1.04) |
| Iwate            | 2011        | 1.0<br>(0.97–1.03)  |
| Iwate            | 2012        | 1.01<br>(0.96–1.06) |
| Iwate            | 2013        | 0.99<br>(0.93–1.04) |
| Iwate            | 2014        | 0.99<br>(0.95–1.04) |
| Iwate            | 2015        | 0.97<br>(0.93–1.02) |
| Iwate            | 2016        | 0.97<br>(0.86–1.09) |
| Iwate            | 2017        | 0.96<br>(0.81–1.13) |
| Kagawa           | 1950        | 1.61<br>(1.33–1.93) |
| Kagawa           | 1951        | 1.59<br>(1.31–1.9)  |
| Kagawa           | 1952        | 1.41<br>(1.17–1.67) |
| Kagawa           | 1953        | 1.42<br>(1.18–1.67) |
| Kagawa           | 1954        | 1.37<br>(1.15–1.61) |
| Kagawa           | 1955        | 1.26<br>(1.07–1.48) |
| Kagawa           | 1956        | 1.33<br>(1.12–1.56) |
| Kagawa           | 1957        | 1.37<br>(1.16–1.6)  |
| Kagawa           | 1958        | 1.3<br>(1.1–1.52)   |
| Kagawa           | 1959        | 1.31<br>(1.11–1.53) |
| Kagawa           | 1960        | 1.28<br>(1.07–1.49) |
| Kagawa           | 1961        | 1.27<br>(1.07–1.5)  |
| Kagawa           | 1962        | 1.27<br>(1.05–1.51) |
| Kagawa           | 1963        | 1.19<br>(0.97–1.41) |
| Kagawa           | 1964        | 1.14<br>(0.93–1.36) |
| Kagawa           | 1965        | 1.1<br>(0.89–1.32)  |
| Kagawa           | 1966        | 1.05<br>(0.86–1.25) |
| Kagawa           | 1967        | 1.15<br>(0.95–1.37) |
| Kagawa           | 1968        | 1.07<br>(0.89–1.27) |
| Kagawa           | 1969        | 1.12<br>(0.94–1.31) |
| Kagawa           | 1970        | 1.13<br>(0.95–1.32) |
| Kagawa           | 1971        | 1.11<br>(0.95–1.3)  |



**Table 15 Ratio of adjusted to unadjusted 5q0 values for scaled locations by year**

| <b>Geography</b> | <b>Year</b> | <b>Ratio</b>        |
|------------------|-------------|---------------------|
| Kagawa           | 1972        | 1.11<br>(0.96–1.29) |
| Kagawa           | 1973        | 1.15<br>(1.0–1.32)  |
| Kagawa           | 1974        | 1.11<br>(0.98–1.26) |
| Kagawa           | 1975        | 1.07<br>(0.95–1.19) |
| Kagawa           | 1976        | 1.05<br>(0.95–1.16) |
| Kagawa           | 1977        | 1.04<br>(0.96–1.12) |
| Kagawa           | 1978        | 1.03<br>(0.97–1.09) |
| Kagawa           | 1979        | 1.01<br>(0.97–1.05) |
| Kagawa           | 1980        | 1.0<br>(0.98–1.03)  |
| Kagawa           | 1981        | 1.01<br>(0.99–1.04) |
| Kagawa           | 1982        | 1.0<br>(0.97–1.02)  |
| Kagawa           | 1983        | 1.0<br>(0.97–1.02)  |
| Kagawa           | 1984        | 1.01<br>(0.98–1.03) |
| Kagawa           | 1985        | 0.98<br>(0.95–1.01) |
| Kagawa           | 1986        | 0.99<br>(0.96–1.02) |
| Kagawa           | 1987        | 0.98<br>(0.95–1.01) |
| Kagawa           | 1988        | 0.98<br>(0.95–1.01) |
| Kagawa           | 1989        | 0.97<br>(0.94–1.0)  |
| Kagawa           | 1990        | 1.01<br>(0.97–1.03) |
| Kagawa           | 1991        | 0.99<br>(0.96–1.02) |
| Kagawa           | 1992        | 1.02<br>(0.99–1.05) |
| Kagawa           | 1993        | 1.02<br>(0.99–1.06) |
| Kagawa           | 1994        | 1.03<br>(0.99–1.06) |
| Kagawa           | 1995        | 1.03<br>(0.99–1.06) |
| Kagawa           | 1996        | 0.99<br>(0.96–1.02) |
| Kagawa           | 1997        | 0.99<br>(0.96–1.03) |
| Kagawa           | 1998        | 1.03<br>(1.0–1.07)  |
| Kagawa           | 1999        | 0.99<br>(0.96–1.03) |
| Kagawa           | 2000        | 0.99<br>(0.95–1.02) |
| Kagawa           | 2001        | 0.97<br>(0.93–1.01) |
| Kagawa           | 2002        | 0.98<br>(0.94–1.02) |

**Table 15 Ratio of adjusted to unadjusted 5q0 values for scaled locations by year**

| <b>Geography</b> | <b>Year</b> | <b>Ratio</b>        |
|------------------|-------------|---------------------|
| Kagawa           | 2003        | 0.98<br>(0.94–1.02) |
| Kagawa           | 2004        | 0.98<br>(0.94–1.02) |
| Kagawa           | 2005        | 0.99<br>(0.95–1.03) |
| Kagawa           | 2006        | 0.99<br>(0.95–1.03) |
| Kagawa           | 2007        | 0.99<br>(0.94–1.03) |
| Kagawa           | 2008        | 1.0<br>(0.97–1.04)  |
| Kagawa           | 2009        | 0.98<br>(0.93–1.02) |
| Kagawa           | 2010        | 0.99<br>(0.95–1.04) |
| Kagawa           | 2011        | 1.0<br>(0.97–1.03)  |
| Kagawa           | 2012        | 1.01<br>(0.96–1.06) |
| Kagawa           | 2013        | 0.99<br>(0.93–1.04) |
| Kagawa           | 2014        | 0.99<br>(0.95–1.04) |
| Kagawa           | 2015        | 0.97<br>(0.93–1.02) |
| Kagawa           | 2016        | 0.97<br>(0.86–1.09) |
| Kagawa           | 2017        | 0.96<br>(0.81–1.13) |
| Kagoshima        | 1950        | 1.61<br>(1.32–1.92) |
| Kagoshima        | 1951        | 1.58<br>(1.3–1.89)  |
| Kagoshima        | 1952        | 1.41<br>(1.17–1.67) |
| Kagoshima        | 1953        | 1.42<br>(1.18–1.67) |
| Kagoshima        | 1954        | 1.37<br>(1.15–1.61) |
| Kagoshima        | 1955        | 1.26<br>(1.07–1.48) |
| Kagoshima        | 1956        | 1.32<br>(1.12–1.55) |
| Kagoshima        | 1957        | 1.37<br>(1.16–1.59) |
| Kagoshima        | 1958        | 1.3<br>(1.1–1.51)   |
| Kagoshima        | 1959        | 1.31<br>(1.11–1.53) |
| Kagoshima        | 1960        | 1.28<br>(1.07–1.49) |
| Kagoshima        | 1961        | 1.27<br>(1.07–1.49) |
| Kagoshima        | 1962        | 1.26<br>(1.05–1.51) |
| Kagoshima        | 1963        | 1.19<br>(0.97–1.41) |
| Kagoshima        | 1964        | 1.14<br>(0.93–1.36) |
| Kagoshima        | 1965        | 1.1<br>(0.89–1.32)  |

**Table 15 Ratio of adjusted to unadjusted 5q0 values for scaled locations by year**

| <b>Geography</b> | <b>Year</b> | <b>Ratio</b>        |
|------------------|-------------|---------------------|
| Kagoshima        | 1966        | 1.05<br>(0.86–1.25) |
| Kagoshima        | 1967        | 1.15<br>(0.95–1.37) |
| Kagoshima        | 1968        | 1.07<br>(0.89–1.27) |
| Kagoshima        | 1969        | 1.12<br>(0.94–1.31) |
| Kagoshima        | 1970        | 1.13<br>(0.95–1.32) |
| Kagoshima        | 1971        | 1.11<br>(0.95–1.29) |
| Kagoshima        | 1972        | 1.11<br>(0.96–1.29) |
| Kagoshima        | 1973        | 1.15<br>(1.0–1.32)  |
| Kagoshima        | 1974        | 1.11<br>(0.98–1.26) |
| Kagoshima        | 1975        | 1.07<br>(0.95–1.19) |
| Kagoshima        | 1976        | 1.05<br>(0.95–1.16) |
| Kagoshima        | 1977        | 1.04<br>(0.96–1.12) |
| Kagoshima        | 1978        | 1.03<br>(0.97–1.09) |
| Kagoshima        | 1979        | 1.01<br>(0.97–1.05) |
| Kagoshima        | 1980        | 1.0<br>(0.98–1.03)  |
| Kagoshima        | 1981        | 1.01<br>(0.99–1.04) |
| Kagoshima        | 1982        | 1.0<br>(0.97–1.02)  |
| Kagoshima        | 1983        | 1.0<br>(0.97–1.02)  |
| Kagoshima        | 1984        | 1.01<br>(0.98–1.03) |
| Kagoshima        | 1985        | 0.98<br>(0.95–1.01) |
| Kagoshima        | 1986        | 0.99<br>(0.96–1.02) |
| Kagoshima        | 1987        | 0.98<br>(0.95–1.01) |
| Kagoshima        | 1988        | 0.98<br>(0.95–1.01) |
| Kagoshima        | 1989        | 0.97<br>(0.94–1.0)  |
| Kagoshima        | 1990        | 1.01<br>(0.97–1.03) |
| Kagoshima        | 1991        | 0.99<br>(0.96–1.02) |
| Kagoshima        | 1992        | 1.02<br>(0.99–1.05) |
| Kagoshima        | 1993        | 1.02<br>(0.99–1.06) |
| Kagoshima        | 1994        | 1.03<br>(0.99–1.06) |
| Kagoshima        | 1995        | 1.03<br>(0.99–1.06) |
| Kagoshima        | 1996        | 0.99<br>(0.96–1.02) |

**Table 15 Ratio of adjusted to unadjusted 5q0 values for scaled locations by year**

| <b>Geography</b> | <b>Year</b> | <b>Ratio</b>        |
|------------------|-------------|---------------------|
| Kagoshima        | 1997        | 0.99<br>(0.96–1.03) |
| Kagoshima        | 1998        | 1.03<br>(1.0–1.07)  |
| Kagoshima        | 1999        | 0.99<br>(0.96–1.03) |
| Kagoshima        | 2000        | 0.99<br>(0.95–1.02) |
| Kagoshima        | 2001        | 0.97<br>(0.93–1.01) |
| Kagoshima        | 2002        | 0.98<br>(0.94–1.02) |
| Kagoshima        | 2003        | 0.98<br>(0.94–1.02) |
| Kagoshima        | 2004        | 0.98<br>(0.94–1.02) |
| Kagoshima        | 2005        | 0.99<br>(0.95–1.03) |
| Kagoshima        | 2006        | 0.99<br>(0.95–1.03) |
| Kagoshima        | 2007        | 0.99<br>(0.94–1.03) |
| Kagoshima        | 2008        | 1.0<br>(0.97–1.04)  |
| Kagoshima        | 2009        | 0.98<br>(0.93–1.02) |
| Kagoshima        | 2010        | 0.99<br>(0.95–1.04) |
| Kagoshima        | 2011        | 1.0<br>(0.97–1.03)  |
| Kagoshima        | 2012        | 1.01<br>(0.96–1.06) |
| Kagoshima        | 2013        | 0.99<br>(0.93–1.04) |
| Kagoshima        | 2014        | 0.99<br>(0.95–1.04) |
| Kagoshima        | 2015        | 0.97<br>(0.93–1.02) |
| Kagoshima        | 2016        | 0.97<br>(0.86–1.09) |
| Kagoshima        | 2017        | 0.96<br>(0.81–1.13) |
| Kanagawa         | 1950        | 1.62<br>(1.33–1.94) |
| Kanagawa         | 1951        | 1.59<br>(1.31–1.9)  |
| Kanagawa         | 1952        | 1.41<br>(1.17–1.67) |
| Kanagawa         | 1953        | 1.43<br>(1.18–1.68) |
| Kanagawa         | 1954        | 1.37<br>(1.15–1.61) |
| Kanagawa         | 1955        | 1.27<br>(1.07–1.49) |
| Kanagawa         | 1956        | 1.33<br>(1.12–1.56) |
| Kanagawa         | 1957        | 1.37<br>(1.16–1.6)  |
| Kanagawa         | 1958        | 1.3<br>(1.1–1.52)   |
| Kanagawa         | 1959        | 1.31<br>(1.11–1.53) |

**Table 15 Ratio of adjusted to unadjusted 5q0 values for scaled locations by year**

| <b>Geography</b> | <b>Year</b> | <b>Ratio</b>        |
|------------------|-------------|---------------------|
| Kanagawa         | 1960        | 1.28<br>(1.07–1.5)  |
| Kanagawa         | 1961        | 1.27<br>(1.07–1.5)  |
| Kanagawa         | 1962        | 1.27<br>(1.05–1.51) |
| Kanagawa         | 1963        | 1.19<br>(0.97–1.41) |
| Kanagawa         | 1964        | 1.14<br>(0.93–1.36) |
| Kanagawa         | 1965        | 1.1<br>(0.89–1.32)  |
| Kanagawa         | 1966        | 1.05<br>(0.86–1.25) |
| Kanagawa         | 1967        | 1.15<br>(0.95–1.37) |
| Kanagawa         | 1968        | 1.07<br>(0.89–1.27) |
| Kanagawa         | 1969        | 1.12<br>(0.94–1.31) |
| Kanagawa         | 1970        | 1.13<br>(0.95–1.32) |
| Kanagawa         | 1971        | 1.11<br>(0.95–1.3)  |
| Kanagawa         | 1972        | 1.11<br>(0.95–1.29) |
| Kanagawa         | 1973        | 1.15<br>(1.0–1.32)  |
| Kanagawa         | 1974        | 1.11<br>(0.98–1.26) |
| Kanagawa         | 1975        | 1.07<br>(0.95–1.19) |
| Kanagawa         | 1976        | 1.05<br>(0.95–1.16) |
| Kanagawa         | 1977        | 1.04<br>(0.96–1.12) |
| Kanagawa         | 1978        | 1.03<br>(0.97–1.09) |
| Kanagawa         | 1979        | 1.01<br>(0.97–1.05) |
| Kanagawa         | 1980        | 1.0<br>(0.98–1.03)  |
| Kanagawa         | 1981        | 1.01<br>(0.99–1.04) |
| Kanagawa         | 1982        | 1.0<br>(0.97–1.02)  |
| Kanagawa         | 1983        | 1.0<br>(0.97–1.02)  |
| Kanagawa         | 1984        | 1.01<br>(0.98–1.03) |
| Kanagawa         | 1985        | 0.98<br>(0.95–1.01) |
| Kanagawa         | 1986        | 0.99<br>(0.96–1.02) |
| Kanagawa         | 1987        | 0.98<br>(0.95–1.01) |
| Kanagawa         | 1988        | 0.98<br>(0.95–1.01) |
| Kanagawa         | 1989        | 0.97<br>(0.94–1.0)  |
| Kanagawa         | 1990        | 1.01<br>(0.97–1.03) |

**Table 15 Ratio of adjusted to unadjusted 5q0 values for scaled locations by year**

| <b>Geography</b> | <b>Year</b> | <b>Ratio</b>        |
|------------------|-------------|---------------------|
| Kanagawa         | 1991        | 0.99<br>(0.96–1.02) |
| Kanagawa         | 1992        | 1.02<br>(0.99–1.05) |
| Kanagawa         | 1993        | 1.02<br>(0.99–1.06) |
| Kanagawa         | 1994        | 1.03<br>(0.99–1.06) |
| Kanagawa         | 1995        | 1.03<br>(0.99–1.06) |
| Kanagawa         | 1996        | 0.99<br>(0.96–1.02) |
| Kanagawa         | 1997        | 0.99<br>(0.96–1.03) |
| Kanagawa         | 1998        | 1.03<br>(1.0–1.07)  |
| Kanagawa         | 1999        | 0.99<br>(0.96–1.03) |
| Kanagawa         | 2000        | 0.99<br>(0.95–1.02) |
| Kanagawa         | 2001        | 0.97<br>(0.93–1.01) |
| Kanagawa         | 2002        | 0.98<br>(0.94–1.02) |
| Kanagawa         | 2003        | 0.98<br>(0.94–1.02) |
| Kanagawa         | 2004        | 0.98<br>(0.94–1.02) |
| Kanagawa         | 2005        | 0.99<br>(0.95–1.03) |
| Kanagawa         | 2006        | 0.99<br>(0.95–1.03) |
| Kanagawa         | 2007        | 0.99<br>(0.94–1.03) |
| Kanagawa         | 2008        | 1.0<br>(0.97–1.04)  |
| Kanagawa         | 2009        | 0.98<br>(0.93–1.02) |
| Kanagawa         | 2010        | 0.99<br>(0.95–1.04) |
| Kanagawa         | 2011        | 1.0<br>(0.97–1.03)  |
| Kanagawa         | 2012        | 1.01<br>(0.96–1.06) |
| Kanagawa         | 2013        | 0.99<br>(0.93–1.04) |
| Kanagawa         | 2014        | 0.99<br>(0.95–1.04) |
| Kanagawa         | 2015        | 0.97<br>(0.93–1.02) |
| Kanagawa         | 2016        | 0.97<br>(0.86–1.09) |
| Kanagawa         | 2017        | 0.96<br>(0.81–1.13) |
| Kōchi            | 1950        | 1.61<br>(1.33–1.92) |
| Kōchi            | 1951        | 1.59<br>(1.31–1.89) |
| Kōchi            | 1952        | 1.41<br>(1.17–1.67) |
| Kōchi            | 1953        | 1.42<br>(1.18–1.67) |

**Table 15 Ratio of adjusted to unadjusted 5q0 values for scaled locations by year**

| <b>Geography</b> | <b>Year</b> | <b>Ratio</b>        |
|------------------|-------------|---------------------|
| Kōchi            | 1954        | 1.37<br>(1.15–1.61) |
| Kōchi            | 1955        | 1.26<br>(1.07–1.48) |
| Kōchi            | 1956        | 1.33<br>(1.12–1.55) |
| Kōchi            | 1957        | 1.37<br>(1.16–1.59) |
| Kōchi            | 1958        | 1.3<br>(1.1–1.51)   |
| Kōchi            | 1959        | 1.31<br>(1.11–1.53) |
| Kōchi            | 1960        | 1.28<br>(1.07–1.49) |
| Kōchi            | 1961        | 1.27<br>(1.07–1.49) |
| Kōchi            | 1962        | 1.27<br>(1.05–1.51) |
| Kōchi            | 1963        | 1.19<br>(0.97–1.41) |
| Kōchi            | 1964        | 1.14<br>(0.93–1.36) |
| Kōchi            | 1965        | 1.1<br>(0.89–1.32)  |
| Kōchi            | 1966        | 1.05<br>(0.86–1.25) |
| Kōchi            | 1967        | 1.15<br>(0.95–1.37) |
| Kōchi            | 1968        | 1.07<br>(0.89–1.27) |
| Kōchi            | 1969        | 1.12<br>(0.94–1.31) |
| Kōchi            | 1970        | 1.13<br>(0.95–1.32) |
| Kōchi            | 1971        | 1.11<br>(0.95–1.3)  |
| Kōchi            | 1972        | 1.11<br>(0.96–1.29) |
| Kōchi            | 1973        | 1.15<br>(1.0–1.32)  |
| Kōchi            | 1974        | 1.11<br>(0.98–1.26) |
| Kōchi            | 1975        | 1.07<br>(0.95–1.19) |
| Kōchi            | 1976        | 1.05<br>(0.95–1.16) |
| Kōchi            | 1977        | 1.04<br>(0.96–1.12) |
| Kōchi            | 1978        | 1.03<br>(0.97–1.09) |
| Kōchi            | 1979        | 1.01<br>(0.97–1.05) |
| Kōchi            | 1980        | 1.0<br>(0.98–1.03)  |
| Kōchi            | 1981        | 1.01<br>(0.99–1.04) |
| Kōchi            | 1982        | 1.0<br>(0.97–1.02)  |
| Kōchi            | 1983        | 1.0<br>(0.97–1.02)  |
| Kōchi            | 1984        | 1.01<br>(0.98–1.03) |

**Table 15 Ratio of adjusted to unadjusted 5q0 values for scaled locations by year**

| <b>Geography</b> | <b>Year</b> | <b>Ratio</b>        |
|------------------|-------------|---------------------|
| Kōchi            | 1985        | 0.98<br>(0.95–1.01) |
| Kōchi            | 1986        | 0.99<br>(0.96–1.02) |
| Kōchi            | 1987        | 0.98<br>(0.95–1.01) |
| Kōchi            | 1988        | 0.98<br>(0.95–1.01) |
| Kōchi            | 1989        | 0.97<br>(0.94–1.0)  |
| Kōchi            | 1990        | 1.01<br>(0.97–1.03) |
| Kōchi            | 1991        | 0.99<br>(0.96–1.02) |
| Kōchi            | 1992        | 1.02<br>(0.99–1.05) |
| Kōchi            | 1993        | 1.02<br>(0.99–1.06) |
| Kōchi            | 1994        | 1.03<br>(0.99–1.06) |
| Kōchi            | 1995        | 1.03<br>(0.99–1.06) |
| Kōchi            | 1996        | 0.99<br>(0.96–1.02) |
| Kōchi            | 1997        | 0.99<br>(0.96–1.03) |
| Kōchi            | 1998        | 1.03<br>(1.0–1.07)  |
| Kōchi            | 1999        | 0.99<br>(0.96–1.03) |
| Kōchi            | 2000        | 0.99<br>(0.95–1.02) |
| Kōchi            | 2001        | 0.97<br>(0.93–1.01) |
| Kōchi            | 2002        | 0.98<br>(0.94–1.02) |
| Kōchi            | 2003        | 0.98<br>(0.94–1.02) |
| Kōchi            | 2004        | 0.98<br>(0.94–1.02) |
| Kōchi            | 2005        | 0.99<br>(0.95–1.03) |
| Kōchi            | 2006        | 0.99<br>(0.95–1.03) |
| Kōchi            | 2007        | 0.99<br>(0.94–1.03) |
| Kōchi            | 2008        | 1.0<br>(0.97–1.04)  |
| Kōchi            | 2009        | 0.98<br>(0.93–1.02) |
| Kōchi            | 2010        | 0.99<br>(0.95–1.04) |
| Kōchi            | 2011        | 1.0<br>(0.97–1.03)  |
| Kōchi            | 2012        | 1.01<br>(0.96–1.06) |
| Kōchi            | 2013        | 0.99<br>(0.93–1.04) |
| Kōchi            | 2014        | 0.99<br>(0.95–1.04) |
| Kōchi            | 2015        | 0.97<br>(0.93–1.02) |



**Table 15 Ratio of adjusted to unadjusted 5q0 values for scaled locations by year**

| <b>Geography</b> | <b>Year</b> | <b>Ratio</b>        |
|------------------|-------------|---------------------|
| Kōchi            | 2016        | 0.97<br>(0.86–1.09) |
| Kōchi            | 2017        | 0.96<br>(0.81–1.13) |
| Kumamoto         | 1950        | 1.61<br>(1.33–1.92) |
| Kumamoto         | 1951        | 1.59<br>(1.31–1.89) |
| Kumamoto         | 1952        | 1.41<br>(1.17–1.67) |
| Kumamoto         | 1953        | 1.42<br>(1.18–1.67) |
| Kumamoto         | 1954        | 1.37<br>(1.15–1.61) |
| Kumamoto         | 1955        | 1.26<br>(1.07–1.48) |
| Kumamoto         | 1956        | 1.33<br>(1.12–1.55) |
| Kumamoto         | 1957        | 1.37<br>(1.16–1.59) |
| Kumamoto         | 1958        | 1.3<br>(1.1–1.51)   |
| Kumamoto         | 1959        | 1.31<br>(1.11–1.53) |
| Kumamoto         | 1960        | 1.28<br>(1.07–1.49) |
| Kumamoto         | 1961        | 1.27<br>(1.07–1.49) |
| Kumamoto         | 1962        | 1.27<br>(1.05–1.51) |
| Kumamoto         | 1963        | 1.19<br>(0.97–1.41) |
| Kumamoto         | 1964        | 1.14<br>(0.93–1.36) |
| Kumamoto         | 1965        | 1.1<br>(0.89–1.32)  |
| Kumamoto         | 1966        | 1.05<br>(0.86–1.25) |
| Kumamoto         | 1967        | 1.15<br>(0.95–1.37) |
| Kumamoto         | 1968        | 1.07<br>(0.89–1.27) |
| Kumamoto         | 1969        | 1.12<br>(0.94–1.31) |
| Kumamoto         | 1970        | 1.13<br>(0.95–1.32) |
| Kumamoto         | 1971        | 1.11<br>(0.95–1.29) |
| Kumamoto         | 1972        | 1.11<br>(0.96–1.29) |
| Kumamoto         | 1973        | 1.15<br>(1.0–1.32)  |
| Kumamoto         | 1974        | 1.11<br>(0.98–1.26) |
| Kumamoto         | 1975        | 1.07<br>(0.95–1.19) |
| Kumamoto         | 1976        | 1.05<br>(0.95–1.16) |
| Kumamoto         | 1977        | 1.04<br>(0.96–1.12) |
| Kumamoto         | 1978        | 1.03<br>(0.97–1.09) |

**Table 15 Ratio of adjusted to unadjusted 5q0 values for scaled locations by year**

| <b>Geography</b> | <b>Year</b> | <b>Ratio</b>        |
|------------------|-------------|---------------------|
| Kumamoto         | 1979        | 1.01<br>(0.97–1.05) |
| Kumamoto         | 1980        | 1.0<br>(0.98–1.03)  |
| Kumamoto         | 1981        | 1.01<br>(0.99–1.04) |
| Kumamoto         | 1982        | 1.0<br>(0.97–1.02)  |
| Kumamoto         | 1983        | 1.0<br>(0.97–1.02)  |
| Kumamoto         | 1984        | 1.01<br>(0.98–1.03) |
| Kumamoto         | 1985        | 0.98<br>(0.95–1.01) |
| Kumamoto         | 1986        | 0.99<br>(0.96–1.02) |
| Kumamoto         | 1987        | 0.98<br>(0.95–1.01) |
| Kumamoto         | 1988        | 0.98<br>(0.95–1.01) |
| Kumamoto         | 1989        | 0.97<br>(0.94–1.0)  |
| Kumamoto         | 1990        | 1.01<br>(0.97–1.03) |
| Kumamoto         | 1991        | 0.99<br>(0.96–1.02) |
| Kumamoto         | 1992        | 1.02<br>(0.99–1.05) |
| Kumamoto         | 1993        | 1.02<br>(0.99–1.06) |
| Kumamoto         | 1994        | 1.03<br>(0.99–1.06) |
| Kumamoto         | 1995        | 1.03<br>(0.99–1.06) |
| Kumamoto         | 1996        | 0.99<br>(0.96–1.02) |
| Kumamoto         | 1997        | 0.99<br>(0.96–1.03) |
| Kumamoto         | 1998        | 1.03<br>(1.0–1.07)  |
| Kumamoto         | 1999        | 0.99<br>(0.96–1.03) |
| Kumamoto         | 2000        | 0.99<br>(0.95–1.02) |
| Kumamoto         | 2001        | 0.97<br>(0.93–1.01) |
| Kumamoto         | 2002        | 0.98<br>(0.94–1.02) |
| Kumamoto         | 2003        | 0.98<br>(0.94–1.02) |
| Kumamoto         | 2004        | 0.98<br>(0.94–1.02) |
| Kumamoto         | 2005        | 0.99<br>(0.95–1.03) |
| Kumamoto         | 2006        | 0.99<br>(0.95–1.03) |
| Kumamoto         | 2007        | 0.99<br>(0.94–1.03) |
| Kumamoto         | 2008        | 1.0<br>(0.97–1.04)  |
| Kumamoto         | 2009        | 0.98<br>(0.93–1.02) |

**Table 15 Ratio of adjusted to unadjusted 5q0 values for scaled locations by year**

| <b>Geography</b> | <b>Year</b> | <b>Ratio</b>        |
|------------------|-------------|---------------------|
| Kumamoto         | 2010        | 0.99<br>(0.95–1.04) |
| Kumamoto         | 2011        | 1.0<br>(0.97–1.03)  |
| Kumamoto         | 2012        | 1.01<br>(0.96–1.06) |
| Kumamoto         | 2013        | 0.99<br>(0.93–1.04) |
| Kumamoto         | 2014        | 0.99<br>(0.95–1.04) |
| Kumamoto         | 2015        | 0.97<br>(0.93–1.02) |
| Kumamoto         | 2016        | 0.97<br>(0.86–1.09) |
| Kumamoto         | 2017        | 0.96<br>(0.81–1.13) |
| Kyōto            | 1950        | 1.62<br>(1.33–1.93) |
| Kyōto            | 1951        | 1.59<br>(1.31–1.9)  |
| Kyōto            | 1952        | 1.41<br>(1.17–1.67) |
| Kyōto            | 1953        | 1.42<br>(1.18–1.68) |
| Kyōto            | 1954        | 1.37<br>(1.15–1.61) |
| Kyōto            | 1955        | 1.27<br>(1.07–1.48) |
| Kyōto            | 1956        | 1.33<br>(1.12–1.56) |
| Kyōto            | 1957        | 1.37<br>(1.16–1.6)  |
| Kyōto            | 1958        | 1.3<br>(1.1–1.52)   |
| Kyōto            | 1959        | 1.31<br>(1.11–1.53) |
| Kyōto            | 1960        | 1.28<br>(1.07–1.49) |
| Kyōto            | 1961        | 1.27<br>(1.07–1.5)  |
| Kyōto            | 1962        | 1.27<br>(1.05–1.51) |
| Kyōto            | 1963        | 1.19<br>(0.97–1.41) |
| Kyōto            | 1964        | 1.14<br>(0.93–1.36) |
| Kyōto            | 1965        | 1.1<br>(0.89–1.32)  |
| Kyōto            | 1966        | 1.05<br>(0.86–1.25) |
| Kyōto            | 1967        | 1.15<br>(0.95–1.37) |
| Kyōto            | 1968        | 1.07<br>(0.89–1.27) |
| Kyōto            | 1969        | 1.12<br>(0.94–1.31) |
| Kyōto            | 1970        | 1.13<br>(0.95–1.32) |
| Kyōto            | 1971        | 1.11<br>(0.95–1.3)  |
| Kyōto            | 1972        | 1.11<br>(0.95–1.29) |

**Table 15 Ratio of adjusted to unadjusted 5q0 values for scaled locations by year**

| <b>Geography</b> | <b>Year</b> | <b>Ratio</b>        |
|------------------|-------------|---------------------|
| Kyōto            | 1973        | 1.15<br>(1.0–1.32)  |
| Kyōto            | 1974        | 1.11<br>(0.98–1.26) |
| Kyōto            | 1975        | 1.07<br>(0.95–1.19) |
| Kyōto            | 1976        | 1.05<br>(0.95–1.16) |
| Kyōto            | 1977        | 1.04<br>(0.96–1.12) |
| Kyōto            | 1978        | 1.03<br>(0.97–1.09) |
| Kyōto            | 1979        | 1.01<br>(0.97–1.05) |
| Kyōto            | 1980        | 1.0<br>(0.98–1.03)  |
| Kyōto            | 1981        | 1.01<br>(0.99–1.04) |
| Kyōto            | 1982        | 1.0<br>(0.97–1.02)  |
| Kyōto            | 1983        | 1.0<br>(0.97–1.02)  |
| Kyōto            | 1984        | 1.01<br>(0.98–1.03) |
| Kyōto            | 1985        | 0.98<br>(0.95–1.01) |
| Kyōto            | 1986        | 0.99<br>(0.96–1.02) |
| Kyōto            | 1987        | 0.98<br>(0.95–1.01) |
| Kyōto            | 1988        | 0.98<br>(0.95–1.01) |
| Kyōto            | 1989        | 0.97<br>(0.94–1.0)  |
| Kyōto            | 1990        | 1.01<br>(0.97–1.03) |
| Kyōto            | 1991        | 0.99<br>(0.96–1.02) |
| Kyōto            | 1992        | 1.02<br>(0.99–1.05) |
| Kyōto            | 1993        | 1.02<br>(0.99–1.06) |
| Kyōto            | 1994        | 1.03<br>(0.99–1.06) |
| Kyōto            | 1995        | 1.03<br>(0.99–1.06) |
| Kyōto            | 1996        | 0.99<br>(0.96–1.02) |
| Kyōto            | 1997        | 0.99<br>(0.96–1.03) |
| Kyōto            | 1998        | 1.03<br>(1.0–1.07)  |
| Kyōto            | 1999        | 0.99<br>(0.96–1.03) |
| Kyōto            | 2000        | 0.99<br>(0.95–1.02) |
| Kyōto            | 2001        | 0.97<br>(0.93–1.01) |
| Kyōto            | 2002        | 0.98<br>(0.94–1.02) |
| Kyōto            | 2003        | 0.98<br>(0.94–1.02) |

**Table 15 Ratio of adjusted to unadjusted 5q0 values for scaled locations by year**

| <b>Geography</b> | <b>Year</b> | <b>Ratio</b>        |
|------------------|-------------|---------------------|
| Kyōto            | 2004        | 0.98<br>(0.94–1.02) |
| Kyōto            | 2005        | 0.99<br>(0.95–1.03) |
| Kyōto            | 2006        | 0.99<br>(0.95–1.03) |
| Kyōto            | 2007        | 0.99<br>(0.94–1.03) |
| Kyōto            | 2008        | 1.0<br>(0.97–1.04)  |
| Kyōto            | 2009        | 0.98<br>(0.93–1.02) |
| Kyōto            | 2010        | 0.99<br>(0.95–1.04) |
| Kyōto            | 2011        | 1.0<br>(0.97–1.03)  |
| Kyōto            | 2012        | 1.01<br>(0.96–1.06) |
| Kyōto            | 2013        | 0.99<br>(0.93–1.04) |
| Kyōto            | 2014        | 0.99<br>(0.95–1.04) |
| Kyōto            | 2015        | 0.97<br>(0.93–1.02) |
| Kyōto            | 2016        | 0.97<br>(0.86–1.09) |
| Kyōto            | 2017        | 0.96<br>(0.81–1.13) |
| Mie              | 1950        | 1.61<br>(1.33–1.93) |
| Mie              | 1951        | 1.59<br>(1.31–1.9)  |
| Mie              | 1952        | 1.41<br>(1.17–1.67) |
| Mie              | 1953        | 1.42<br>(1.18–1.67) |
| Mie              | 1954        | 1.37<br>(1.15–1.61) |
| Mie              | 1955        | 1.26<br>(1.07–1.48) |
| Mie              | 1956        | 1.33<br>(1.12–1.55) |
| Mie              | 1957        | 1.37<br>(1.16–1.59) |
| Mie              | 1958        | 1.3<br>(1.1–1.51)   |
| Mie              | 1959        | 1.31<br>(1.11–1.53) |
| Mie              | 1960        | 1.28<br>(1.07–1.49) |
| Mie              | 1961        | 1.27<br>(1.07–1.49) |
| Mie              | 1962        | 1.27<br>(1.05–1.51) |
| Mie              | 1963        | 1.19<br>(0.97–1.41) |
| Mie              | 1964        | 1.14<br>(0.93–1.36) |
| Mie              | 1965        | 1.1<br>(0.89–1.32)  |
| Mie              | 1966        | 1.05<br>(0.86–1.25) |

**Table 15 Ratio of adjusted to unadjusted 5q0 values for scaled locations by year**

| <b>Geography</b> | <b>Year</b> | <b>Ratio</b>        |
|------------------|-------------|---------------------|
| Mie              | 1967        | 1.15<br>(0.95–1.37) |
| Mie              | 1968        | 1.07<br>(0.89–1.27) |
| Mie              | 1969        | 1.12<br>(0.94–1.31) |
| Mie              | 1970        | 1.13<br>(0.95–1.32) |
| Mie              | 1971        | 1.11<br>(0.95–1.3)  |
| Mie              | 1972        | 1.11<br>(0.96–1.29) |
| Mie              | 1973        | 1.15<br>(1.0–1.32)  |
| Mie              | 1974        | 1.11<br>(0.98–1.26) |
| Mie              | 1975        | 1.07<br>(0.95–1.19) |
| Mie              | 1976        | 1.05<br>(0.95–1.16) |
| Mie              | 1977        | 1.04<br>(0.96–1.12) |
| Mie              | 1978        | 1.03<br>(0.97–1.09) |
| Mie              | 1979        | 1.01<br>(0.97–1.05) |
| Mie              | 1980        | 1.0<br>(0.98–1.03)  |
| Mie              | 1981        | 1.01<br>(0.99–1.04) |
| Mie              | 1982        | 1.0<br>(0.97–1.02)  |
| Mie              | 1983        | 1.0<br>(0.97–1.02)  |
| Mie              | 1984        | 1.01<br>(0.98–1.03) |
| Mie              | 1985        | 0.98<br>(0.95–1.01) |
| Mie              | 1986        | 0.99<br>(0.96–1.02) |
| Mie              | 1987        | 0.98<br>(0.95–1.01) |
| Mie              | 1988        | 0.98<br>(0.95–1.01) |
| Mie              | 1989        | 0.97<br>(0.94–1.0)  |
| Mie              | 1990        | 1.01<br>(0.97–1.03) |
| Mie              | 1991        | 0.99<br>(0.96–1.02) |
| Mie              | 1992        | 1.02<br>(0.99–1.05) |
| Mie              | 1993        | 1.02<br>(0.99–1.06) |
| Mie              | 1994        | 1.03<br>(0.99–1.06) |
| Mie              | 1995        | 1.03<br>(0.99–1.06) |
| Mie              | 1996        | 0.99<br>(0.96–1.02) |
| Mie              | 1997        | 0.99<br>(0.96–1.03) |

**Table 15 Ratio of adjusted to unadjusted 5q0 values for scaled locations by year**

| <b>Geography</b> | <b>Year</b> | <b>Ratio</b>        |
|------------------|-------------|---------------------|
| Mie              | 1998        | 1.03<br>(1.0–1.07)  |
| Mie              | 1999        | 0.99<br>(0.96–1.03) |
| Mie              | 2000        | 0.99<br>(0.95–1.02) |
| Mie              | 2001        | 0.97<br>(0.93–1.01) |
| Mie              | 2002        | 0.98<br>(0.94–1.02) |
| Mie              | 2003        | 0.98<br>(0.94–1.02) |
| Mie              | 2004        | 0.98<br>(0.94–1.02) |
| Mie              | 2005        | 0.99<br>(0.95–1.03) |
| Mie              | 2006        | 0.99<br>(0.95–1.03) |
| Mie              | 2007        | 0.99<br>(0.94–1.03) |
| Mie              | 2008        | 1.0<br>(0.97–1.04)  |
| Mie              | 2009        | 0.98<br>(0.93–1.02) |
| Mie              | 2010        | 0.99<br>(0.95–1.04) |
| Mie              | 2011        | 1.0<br>(0.97–1.03)  |
| Mie              | 2012        | 1.01<br>(0.96–1.06) |
| Mie              | 2013        | 0.99<br>(0.93–1.04) |
| Mie              | 2014        | 0.99<br>(0.95–1.04) |
| Mie              | 2015        | 0.97<br>(0.93–1.02) |
| Mie              | 2016        | 0.97<br>(0.86–1.09) |
| Mie              | 2017        | 0.96<br>(0.81–1.13) |
| Miyagi           | 1950        | 1.61<br>(1.33–1.93) |
| Miyagi           | 1951        | 1.59<br>(1.31–1.9)  |
| Miyagi           | 1952        | 1.41<br>(1.17–1.67) |
| Miyagi           | 1953        | 1.42<br>(1.18–1.67) |
| Miyagi           | 1954        | 1.37<br>(1.15–1.61) |
| Miyagi           | 1955        | 1.26<br>(1.07–1.48) |
| Miyagi           | 1956        | 1.33<br>(1.12–1.55) |
| Miyagi           | 1957        | 1.37<br>(1.16–1.59) |
| Miyagi           | 1958        | 1.3<br>(1.1–1.51)   |
| Miyagi           | 1959        | 1.31<br>(1.11–1.53) |
| Miyagi           | 1960        | 1.28<br>(1.07–1.49) |

**Table 15 Ratio of adjusted to unadjusted 5q0 values for scaled locations by year**

| <b>Geography</b> | <b>Year</b> | <b>Ratio</b>        |
|------------------|-------------|---------------------|
| Miyagi           | 1961        | 1.27<br>(1.07–1.5)  |
| Miyagi           | 1962        | 1.27<br>(1.05–1.51) |
| Miyagi           | 1963        | 1.19<br>(0.97–1.41) |
| Miyagi           | 1964        | 1.14<br>(0.93–1.36) |
| Miyagi           | 1965        | 1.1<br>(0.89–1.32)  |
| Miyagi           | 1966        | 1.05<br>(0.86–1.25) |
| Miyagi           | 1967        | 1.15<br>(0.95–1.37) |
| Miyagi           | 1968        | 1.07<br>(0.89–1.27) |
| Miyagi           | 1969        | 1.12<br>(0.94–1.31) |
| Miyagi           | 1970        | 1.13<br>(0.95–1.32) |
| Miyagi           | 1971        | 1.11<br>(0.95–1.3)  |
| Miyagi           | 1972        | 1.11<br>(0.96–1.29) |
| Miyagi           | 1973        | 1.15<br>(1.0–1.32)  |
| Miyagi           | 1974        | 1.11<br>(0.98–1.26) |
| Miyagi           | 1975        | 1.07<br>(0.95–1.19) |
| Miyagi           | 1976        | 1.05<br>(0.95–1.16) |
| Miyagi           | 1977        | 1.04<br>(0.96–1.12) |
| Miyagi           | 1978        | 1.03<br>(0.97–1.09) |
| Miyagi           | 1979        | 1.01<br>(0.97–1.05) |
| Miyagi           | 1980        | 1.0<br>(0.98–1.03)  |
| Miyagi           | 1981        | 1.01<br>(0.99–1.04) |
| Miyagi           | 1982        | 1.0<br>(0.97–1.02)  |
| Miyagi           | 1983        | 1.0<br>(0.97–1.02)  |
| Miyagi           | 1984        | 1.01<br>(0.98–1.03) |
| Miyagi           | 1985        | 0.98<br>(0.95–1.01) |
| Miyagi           | 1986        | 0.99<br>(0.96–1.02) |
| Miyagi           | 1987        | 0.98<br>(0.95–1.01) |
| Miyagi           | 1988        | 0.98<br>(0.95–1.01) |
| Miyagi           | 1989        | 0.97<br>(0.94–1.0)  |
| Miyagi           | 1990        | 1.01<br>(0.97–1.03) |
| Miyagi           | 1991        | 0.99<br>(0.96–1.02) |



**Table 15 Ratio of adjusted to unadjusted 5q0 values for scaled locations by year**

| <b>Geography</b> | <b>Year</b> | <b>Ratio</b>        |
|------------------|-------------|---------------------|
| Miyagi           | 1992        | 1.02<br>(0.99–1.05) |
| Miyagi           | 1993        | 1.02<br>(0.99–1.06) |
| Miyagi           | 1994        | 1.03<br>(0.99–1.06) |
| Miyagi           | 1995        | 1.03<br>(0.99–1.06) |
| Miyagi           | 1996        | 0.99<br>(0.96–1.02) |
| Miyagi           | 1997        | 0.99<br>(0.96–1.03) |
| Miyagi           | 1998        | 1.03<br>(1.0–1.07)  |
| Miyagi           | 1999        | 0.99<br>(0.96–1.03) |
| Miyagi           | 2000        | 0.99<br>(0.95–1.02) |
| Miyagi           | 2001        | 0.97<br>(0.93–1.01) |
| Miyagi           | 2002        | 0.98<br>(0.94–1.02) |
| Miyagi           | 2003        | 0.98<br>(0.94–1.02) |
| Miyagi           | 2004        | 0.98<br>(0.94–1.02) |
| Miyagi           | 2005        | 0.99<br>(0.95–1.03) |
| Miyagi           | 2006        | 0.99<br>(0.95–1.03) |
| Miyagi           | 2007        | 0.99<br>(0.94–1.03) |
| Miyagi           | 2008        | 1.0<br>(0.97–1.04)  |
| Miyagi           | 2009        | 0.98<br>(0.93–1.02) |
| Miyagi           | 2010        | 0.99<br>(0.95–1.04) |
| Miyagi           | 2011        | 1.0<br>(0.97–1.03)  |
| Miyagi           | 2012        | 1.01<br>(0.96–1.06) |
| Miyagi           | 2013        | 0.99<br>(0.93–1.04) |
| Miyagi           | 2014        | 0.99<br>(0.95–1.04) |
| Miyagi           | 2015        | 0.97<br>(0.93–1.02) |
| Miyagi           | 2016        | 0.97<br>(0.86–1.09) |
| Miyagi           | 2017        | 0.96<br>(0.81–1.13) |
| Miyazaki         | 1950        | 1.61<br>(1.33–1.92) |
| Miyazaki         | 1951        | 1.59<br>(1.31–1.89) |
| Miyazaki         | 1952        | 1.41<br>(1.17–1.67) |
| Miyazaki         | 1953        | 1.42<br>(1.18–1.67) |
| Miyazaki         | 1954        | 1.37<br>(1.15–1.61) |

**Table 15 Ratio of adjusted to unadjusted 5q0 values for scaled locations by year**

| <b>Geography</b> | <b>Year</b> | <b>Ratio</b>        |
|------------------|-------------|---------------------|
| Miyazaki         | 1955        | 1.26<br>(1.07–1.48) |
| Miyazaki         | 1956        | 1.33<br>(1.12–1.55) |
| Miyazaki         | 1957        | 1.37<br>(1.16–1.59) |
| Miyazaki         | 1958        | 1.3<br>(1.1–1.51)   |
| Miyazaki         | 1959        | 1.31<br>(1.11–1.53) |
| Miyazaki         | 1960        | 1.28<br>(1.07–1.49) |
| Miyazaki         | 1961        | 1.27<br>(1.07–1.49) |
| Miyazaki         | 1962        | 1.27<br>(1.05–1.51) |
| Miyazaki         | 1963        | 1.19<br>(0.97–1.41) |
| Miyazaki         | 1964        | 1.14<br>(0.93–1.36) |
| Miyazaki         | 1965        | 1.1<br>(0.89–1.32)  |
| Miyazaki         | 1966        | 1.05<br>(0.86–1.25) |
| Miyazaki         | 1967        | 1.15<br>(0.95–1.37) |
| Miyazaki         | 1968        | 1.07<br>(0.89–1.27) |
| Miyazaki         | 1969        | 1.12<br>(0.94–1.31) |
| Miyazaki         | 1970        | 1.13<br>(0.95–1.32) |
| Miyazaki         | 1971        | 1.11<br>(0.95–1.3)  |
| Miyazaki         | 1972        | 1.11<br>(0.96–1.29) |
| Miyazaki         | 1973        | 1.15<br>(1.0–1.32)  |
| Miyazaki         | 1974        | 1.11<br>(0.98–1.26) |
| Miyazaki         | 1975        | 1.07<br>(0.95–1.19) |
| Miyazaki         | 1976        | 1.05<br>(0.95–1.16) |
| Miyazaki         | 1977        | 1.04<br>(0.96–1.12) |
| Miyazaki         | 1978        | 1.03<br>(0.97–1.09) |
| Miyazaki         | 1979        | 1.01<br>(0.97–1.05) |
| Miyazaki         | 1980        | 1.0<br>(0.98–1.03)  |
| Miyazaki         | 1981        | 1.01<br>(0.99–1.04) |
| Miyazaki         | 1982        | 1.0<br>(0.97–1.02)  |
| Miyazaki         | 1983        | 1.0<br>(0.97–1.02)  |
| Miyazaki         | 1984        | 1.01<br>(0.98–1.03) |
| Miyazaki         | 1985        | 0.98<br>(0.95–1.01) |

**Table 15 Ratio of adjusted to unadjusted 5q0 values for scaled locations by year**

| <b>Geography</b> | <b>Year</b> | <b>Ratio</b>        |
|------------------|-------------|---------------------|
| Miyazaki         | 1986        | 0.99<br>(0.96–1.02) |
| Miyazaki         | 1987        | 0.98<br>(0.95–1.01) |
| Miyazaki         | 1988        | 0.98<br>(0.95–1.01) |
| Miyazaki         | 1989        | 0.97<br>(0.94–1.0)  |
| Miyazaki         | 1990        | 1.01<br>(0.97–1.03) |
| Miyazaki         | 1991        | 0.99<br>(0.96–1.02) |
| Miyazaki         | 1992        | 1.02<br>(0.99–1.05) |
| Miyazaki         | 1993        | 1.02<br>(0.99–1.06) |
| Miyazaki         | 1994        | 1.03<br>(0.99–1.06) |
| Miyazaki         | 1995        | 1.03<br>(0.99–1.06) |
| Miyazaki         | 1996        | 0.99<br>(0.96–1.02) |
| Miyazaki         | 1997        | 0.99<br>(0.96–1.03) |
| Miyazaki         | 1998        | 1.03<br>(1.0–1.07)  |
| Miyazaki         | 1999        | 0.99<br>(0.96–1.03) |
| Miyazaki         | 2000        | 0.99<br>(0.95–1.02) |
| Miyazaki         | 2001        | 0.97<br>(0.93–1.01) |
| Miyazaki         | 2002        | 0.98<br>(0.94–1.02) |
| Miyazaki         | 2003        | 0.98<br>(0.94–1.02) |
| Miyazaki         | 2004        | 0.98<br>(0.94–1.02) |
| Miyazaki         | 2005        | 0.99<br>(0.95–1.03) |
| Miyazaki         | 2006        | 0.99<br>(0.95–1.03) |
| Miyazaki         | 2007        | 0.99<br>(0.94–1.03) |
| Miyazaki         | 2008        | 1.0<br>(0.97–1.04)  |
| Miyazaki         | 2009        | 0.98<br>(0.93–1.02) |
| Miyazaki         | 2010        | 0.99<br>(0.95–1.04) |
| Miyazaki         | 2011        | 1.0<br>(0.97–1.03)  |
| Miyazaki         | 2012        | 1.01<br>(0.96–1.06) |
| Miyazaki         | 2013        | 0.99<br>(0.93–1.04) |
| Miyazaki         | 2014        | 0.99<br>(0.95–1.04) |
| Miyazaki         | 2015        | 0.97<br>(0.93–1.02) |
| Miyazaki         | 2016        | 0.97<br>(0.86–1.09) |

**Table 15 Ratio of adjusted to unadjusted 5q0 values for scaled locations by year**

| <b>Geography</b> | <b>Year</b> | <b>Ratio</b>        |
|------------------|-------------|---------------------|
| Miyazaki         | 2017        | 0.96<br>(0.81–1.13) |
| Nagano           | 1950        | 1.61<br>(1.33–1.93) |
| Nagano           | 1951        | 1.59<br>(1.31–1.9)  |
| Nagano           | 1952        | 1.41<br>(1.17–1.67) |
| Nagano           | 1953        | 1.42<br>(1.18–1.67) |
| Nagano           | 1954        | 1.37<br>(1.15–1.61) |
| Nagano           | 1955        | 1.26<br>(1.07–1.48) |
| Nagano           | 1956        | 1.33<br>(1.12–1.56) |
| Nagano           | 1957        | 1.37<br>(1.16–1.6)  |
| Nagano           | 1958        | 1.3<br>(1.1–1.52)   |
| Nagano           | 1959        | 1.31<br>(1.11–1.53) |
| Nagano           | 1960        | 1.28<br>(1.07–1.49) |
| Nagano           | 1961        | 1.27<br>(1.07–1.5)  |
| Nagano           | 1962        | 1.27<br>(1.05–1.51) |
| Nagano           | 1963        | 1.19<br>(0.97–1.41) |
| Nagano           | 1964        | 1.14<br>(0.93–1.36) |
| Nagano           | 1965        | 1.1<br>(0.89–1.32)  |
| Nagano           | 1966        | 1.05<br>(0.86–1.25) |
| Nagano           | 1967        | 1.15<br>(0.95–1.37) |
| Nagano           | 1968        | 1.07<br>(0.89–1.27) |
| Nagano           | 1969        | 1.12<br>(0.94–1.31) |
| Nagano           | 1970        | 1.13<br>(0.95–1.32) |
| Nagano           | 1971        | 1.11<br>(0.95–1.3)  |
| Nagano           | 1972        | 1.11<br>(0.95–1.29) |
| Nagano           | 1973        | 1.15<br>(1.0–1.32)  |
| Nagano           | 1974        | 1.11<br>(0.98–1.26) |
| Nagano           | 1975        | 1.07<br>(0.95–1.19) |
| Nagano           | 1976        | 1.05<br>(0.95–1.16) |
| Nagano           | 1977        | 1.04<br>(0.96–1.12) |
| Nagano           | 1978        | 1.03<br>(0.97–1.09) |
| Nagano           | 1979        | 1.01<br>(0.97–1.05) |

**Table 15 Ratio of adjusted to unadjusted 5q0 values for scaled locations by year**

| <b>Geography</b> | <b>Year</b> | <b>Ratio</b>        |
|------------------|-------------|---------------------|
| Nagano           | 1980        | 1.0<br>(0.98–1.03)  |
| Nagano           | 1981        | 1.01<br>(0.99–1.04) |
| Nagano           | 1982        | 1.0<br>(0.97–1.02)  |
| Nagano           | 1983        | 1.0<br>(0.97–1.02)  |
| Nagano           | 1984        | 1.01<br>(0.98–1.03) |
| Nagano           | 1985        | 0.98<br>(0.95–1.01) |
| Nagano           | 1986        | 0.99<br>(0.96–1.02) |
| Nagano           | 1987        | 0.98<br>(0.95–1.01) |
| Nagano           | 1988        | 0.98<br>(0.95–1.01) |
| Nagano           | 1989        | 0.97<br>(0.94–1.0)  |
| Nagano           | 1990        | 1.01<br>(0.97–1.03) |
| Nagano           | 1991        | 0.99<br>(0.96–1.02) |
| Nagano           | 1992        | 1.02<br>(0.99–1.05) |
| Nagano           | 1993        | 1.02<br>(0.99–1.06) |
| Nagano           | 1994        | 1.03<br>(0.99–1.06) |
| Nagano           | 1995        | 1.03<br>(0.99–1.06) |
| Nagano           | 1996        | 0.99<br>(0.96–1.02) |
| Nagano           | 1997        | 0.99<br>(0.96–1.03) |
| Nagano           | 1998        | 1.03<br>(1.0–1.07)  |
| Nagano           | 1999        | 0.99<br>(0.96–1.03) |
| Nagano           | 2000        | 0.99<br>(0.95–1.02) |
| Nagano           | 2001        | 0.97<br>(0.93–1.01) |
| Nagano           | 2002        | 0.98<br>(0.94–1.02) |
| Nagano           | 2003        | 0.98<br>(0.94–1.02) |
| Nagano           | 2004        | 0.98<br>(0.94–1.02) |
| Nagano           | 2005        | 0.99<br>(0.95–1.03) |
| Nagano           | 2006        | 0.99<br>(0.95–1.03) |
| Nagano           | 2007        | 0.99<br>(0.94–1.03) |
| Nagano           | 2008        | 1.0<br>(0.97–1.04)  |
| Nagano           | 2009        | 0.98<br>(0.93–1.02) |
| Nagano           | 2010        | 0.99<br>(0.95–1.04) |

**Table 15 Ratio of adjusted to unadjusted 5q0 values for scaled locations by year**

| <b>Geography</b> | <b>Year</b> | <b>Ratio</b>        |
|------------------|-------------|---------------------|
| Nagano           | 2011        | 1.0<br>(0.97–1.03)  |
| Nagano           | 2012        | 1.01<br>(0.96–1.06) |
| Nagano           | 2013        | 0.99<br>(0.93–1.04) |
| Nagano           | 2014        | 0.99<br>(0.95–1.04) |
| Nagano           | 2015        | 0.97<br>(0.93–1.02) |
| Nagano           | 2016        | 0.97<br>(0.86–1.09) |
| Nagano           | 2017        | 0.96<br>(0.81–1.13) |
| Nagasaki         | 1950        | 1.61<br>(1.33–1.93) |
| Nagasaki         | 1951        | 1.59<br>(1.31–1.9)  |
| Nagasaki         | 1952        | 1.41<br>(1.17–1.67) |
| Nagasaki         | 1953        | 1.42<br>(1.18–1.67) |
| Nagasaki         | 1954        | 1.37<br>(1.15–1.61) |
| Nagasaki         | 1955        | 1.26<br>(1.07–1.48) |
| Nagasaki         | 1956        | 1.33<br>(1.12–1.56) |
| Nagasaki         | 1957        | 1.37<br>(1.16–1.6)  |
| Nagasaki         | 1958        | 1.3<br>(1.1–1.52)   |
| Nagasaki         | 1959        | 1.31<br>(1.11–1.53) |
| Nagasaki         | 1960        | 1.28<br>(1.07–1.49) |
| Nagasaki         | 1961        | 1.27<br>(1.07–1.5)  |
| Nagasaki         | 1962        | 1.27<br>(1.05–1.51) |
| Nagasaki         | 1963        | 1.19<br>(0.97–1.41) |
| Nagasaki         | 1964        | 1.14<br>(0.93–1.36) |
| Nagasaki         | 1965        | 1.1<br>(0.89–1.32)  |
| Nagasaki         | 1966        | 1.05<br>(0.86–1.25) |
| Nagasaki         | 1967        | 1.15<br>(0.95–1.37) |
| Nagasaki         | 1968        | 1.07<br>(0.89–1.27) |
| Nagasaki         | 1969        | 1.12<br>(0.94–1.31) |
| Nagasaki         | 1970        | 1.13<br>(0.95–1.32) |
| Nagasaki         | 1971        | 1.11<br>(0.95–1.3)  |
| Nagasaki         | 1972        | 1.11<br>(0.96–1.29) |
| Nagasaki         | 1973        | 1.15<br>(1.0–1.32)  |

**Table 15 Ratio of adjusted to unadjusted 5q0 values for scaled locations by year**

| <b>Geography</b> | <b>Year</b> | <b>Ratio</b>        |
|------------------|-------------|---------------------|
| Nagasaki         | 1974        | 1.11<br>(0.98–1.26) |
| Nagasaki         | 1975        | 1.07<br>(0.95–1.19) |
| Nagasaki         | 1976        | 1.05<br>(0.95–1.16) |
| Nagasaki         | 1977        | 1.04<br>(0.96–1.12) |
| Nagasaki         | 1978        | 1.03<br>(0.97–1.09) |
| Nagasaki         | 1979        | 1.01<br>(0.97–1.05) |
| Nagasaki         | 1980        | 1.0<br>(0.98–1.03)  |
| Nagasaki         | 1981        | 1.01<br>(0.99–1.04) |
| Nagasaki         | 1982        | 1.0<br>(0.97–1.02)  |
| Nagasaki         | 1983        | 1.0<br>(0.97–1.02)  |
| Nagasaki         | 1984        | 1.01<br>(0.98–1.03) |
| Nagasaki         | 1985        | 0.98<br>(0.95–1.01) |
| Nagasaki         | 1986        | 0.99<br>(0.96–1.02) |
| Nagasaki         | 1987        | 0.98<br>(0.95–1.01) |
| Nagasaki         | 1988        | 0.98<br>(0.95–1.01) |
| Nagasaki         | 1989        | 0.97<br>(0.94–1.0)  |
| Nagasaki         | 1990        | 1.01<br>(0.97–1.03) |
| Nagasaki         | 1991        | 0.99<br>(0.96–1.02) |
| Nagasaki         | 1992        | 1.02<br>(0.99–1.05) |
| Nagasaki         | 1993        | 1.02<br>(0.99–1.06) |
| Nagasaki         | 1994        | 1.03<br>(0.99–1.06) |
| Nagasaki         | 1995        | 1.03<br>(0.99–1.06) |
| Nagasaki         | 1996        | 0.99<br>(0.96–1.02) |
| Nagasaki         | 1997        | 0.99<br>(0.96–1.03) |
| Nagasaki         | 1998        | 1.03<br>(1.0–1.07)  |
| Nagasaki         | 1999        | 0.99<br>(0.96–1.03) |
| Nagasaki         | 2000        | 0.99<br>(0.95–1.02) |
| Nagasaki         | 2001        | 0.97<br>(0.93–1.01) |
| Nagasaki         | 2002        | 0.98<br>(0.94–1.02) |
| Nagasaki         | 2003        | 0.98<br>(0.94–1.02) |
| Nagasaki         | 2004        | 0.98<br>(0.94–1.02) |

**Table 15 Ratio of adjusted to unadjusted 5q0 values for scaled locations by year**

| <b>Geography</b> | <b>Year</b> | <b>Ratio</b>        |
|------------------|-------------|---------------------|
| Nagasaki         | 2005        | 0.99<br>(0.95–1.03) |
| Nagasaki         | 2006        | 0.99<br>(0.95–1.03) |
| Nagasaki         | 2007        | 0.99<br>(0.94–1.03) |
| Nagasaki         | 2008        | 1.0<br>(0.97–1.04)  |
| Nagasaki         | 2009        | 0.98<br>(0.93–1.02) |
| Nagasaki         | 2010        | 0.99<br>(0.95–1.04) |
| Nagasaki         | 2011        | 1.0<br>(0.97–1.03)  |
| Nagasaki         | 2012        | 1.01<br>(0.96–1.06) |
| Nagasaki         | 2013        | 0.99<br>(0.93–1.04) |
| Nagasaki         | 2014        | 0.99<br>(0.95–1.04) |
| Nagasaki         | 2015        | 0.97<br>(0.93–1.02) |
| Nagasaki         | 2016        | 0.97<br>(0.86–1.09) |
| Nagasaki         | 2017        | 0.96<br>(0.81–1.13) |
| Nara             | 1950        | 1.61<br>(1.33–1.93) |
| Nara             | 1951        | 1.59<br>(1.31–1.9)  |
| Nara             | 1952        | 1.41<br>(1.17–1.67) |
| Nara             | 1953        | 1.42<br>(1.18–1.67) |
| Nara             | 1954        | 1.37<br>(1.15–1.61) |
| Nara             | 1955        | 1.26<br>(1.07–1.48) |
| Nara             | 1956        | 1.33<br>(1.12–1.55) |
| Nara             | 1957        | 1.37<br>(1.16–1.59) |
| Nara             | 1958        | 1.3<br>(1.1–1.51)   |
| Nara             | 1959        | 1.31<br>(1.11–1.53) |
| Nara             | 1960        | 1.28<br>(1.07–1.49) |
| Nara             | 1961        | 1.27<br>(1.07–1.5)  |
| Nara             | 1962        | 1.27<br>(1.05–1.51) |
| Nara             | 1963        | 1.19<br>(0.97–1.41) |
| Nara             | 1964        | 1.14<br>(0.93–1.36) |
| Nara             | 1965        | 1.1<br>(0.89–1.32)  |
| Nara             | 1966        | 1.05<br>(0.86–1.25) |
| Nara             | 1967        | 1.15<br>(0.95–1.37) |



**Table 15 Ratio of adjusted to unadjusted 5q0 values for scaled locations by year**

| <b>Geography</b> | <b>Year</b> | <b>Ratio</b>        |
|------------------|-------------|---------------------|
| Nara             | 1968        | 1.07<br>(0.89–1.27) |
| Nara             | 1969        | 1.12<br>(0.94–1.31) |
| Nara             | 1970        | 1.13<br>(0.95–1.32) |
| Nara             | 1971        | 1.11<br>(0.95–1.3)  |
| Nara             | 1972        | 1.11<br>(0.96–1.29) |
| Nara             | 1973        | 1.15<br>(1.0–1.32)  |
| Nara             | 1974        | 1.11<br>(0.98–1.26) |
| Nara             | 1975        | 1.07<br>(0.95–1.19) |
| Nara             | 1976        | 1.05<br>(0.95–1.16) |
| Nara             | 1977        | 1.04<br>(0.96–1.12) |
| Nara             | 1978        | 1.03<br>(0.97–1.09) |
| Nara             | 1979        | 1.01<br>(0.97–1.05) |
| Nara             | 1980        | 1.0<br>(0.98–1.03)  |
| Nara             | 1981        | 1.01<br>(0.99–1.04) |
| Nara             | 1982        | 1.0<br>(0.97–1.02)  |
| Nara             | 1983        | 1.0<br>(0.97–1.02)  |
| Nara             | 1984        | 1.01<br>(0.98–1.03) |
| Nara             | 1985        | 0.98<br>(0.95–1.01) |
| Nara             | 1986        | 0.99<br>(0.96–1.02) |
| Nara             | 1987        | 0.98<br>(0.95–1.01) |
| Nara             | 1988        | 0.98<br>(0.95–1.01) |
| Nara             | 1989        | 0.97<br>(0.94–1.0)  |
| Nara             | 1990        | 1.01<br>(0.97–1.03) |
| Nara             | 1991        | 0.99<br>(0.96–1.02) |
| Nara             | 1992        | 1.02<br>(0.99–1.05) |
| Nara             | 1993        | 1.02<br>(0.99–1.06) |
| Nara             | 1994        | 1.03<br>(0.99–1.06) |
| Nara             | 1995        | 1.03<br>(0.99–1.06) |
| Nara             | 1996        | 0.99<br>(0.96–1.02) |
| Nara             | 1997        | 0.99<br>(0.96–1.03) |
| Nara             | 1998        | 1.03<br>(1.0–1.07)  |

**Table 15 Ratio of adjusted to unadjusted 5q0 values for scaled locations by year**

| <b>Geography</b> | <b>Year</b> | <b>Ratio</b>        |
|------------------|-------------|---------------------|
| Nara             | 1999        | 0.99<br>(0.96–1.03) |
| Nara             | 2000        | 0.99<br>(0.95–1.02) |
| Nara             | 2001        | 0.97<br>(0.93–1.01) |
| Nara             | 2002        | 0.98<br>(0.94–1.02) |
| Nara             | 2003        | 0.98<br>(0.94–1.02) |
| Nara             | 2004        | 0.98<br>(0.94–1.02) |
| Nara             | 2005        | 0.99<br>(0.95–1.03) |
| Nara             | 2006        | 0.99<br>(0.95–1.03) |
| Nara             | 2007        | 0.99<br>(0.94–1.03) |
| Nara             | 2008        | 1.0<br>(0.97–1.04)  |
| Nara             | 2009        | 0.98<br>(0.93–1.02) |
| Nara             | 2010        | 0.99<br>(0.95–1.04) |
| Nara             | 2011        | 1.0<br>(0.97–1.03)  |
| Nara             | 2012        | 1.01<br>(0.96–1.06) |
| Nara             | 2013        | 0.99<br>(0.93–1.04) |
| Nara             | 2014        | 0.99<br>(0.95–1.04) |
| Nara             | 2015        | 0.97<br>(0.93–1.02) |
| Nara             | 2016        | 0.97<br>(0.86–1.09) |
| Nara             | 2017        | 0.96<br>(0.81–1.13) |
| Niigata          | 1950        | 1.61<br>(1.33–1.93) |
| Niigata          | 1951        | 1.59<br>(1.31–1.89) |
| Niigata          | 1952        | 1.41<br>(1.17–1.67) |
| Niigata          | 1953        | 1.42<br>(1.18–1.67) |
| Niigata          | 1954        | 1.37<br>(1.15–1.61) |
| Niigata          | 1955        | 1.26<br>(1.07–1.48) |
| Niigata          | 1956        | 1.33<br>(1.12–1.55) |
| Niigata          | 1957        | 1.37<br>(1.16–1.59) |
| Niigata          | 1958        | 1.3<br>(1.1–1.51)   |
| Niigata          | 1959        | 1.31<br>(1.11–1.53) |
| Niigata          | 1960        | 1.28<br>(1.07–1.49) |
| Niigata          | 1961        | 1.27<br>(1.07–1.5)  |

**Table 15 Ratio of adjusted to unadjusted 5q0 values for scaled locations by year**

| <b>Geography</b> | <b>Year</b> | <b>Ratio</b>        |
|------------------|-------------|---------------------|
| Niigata          | 1962        | 1.27<br>(1.05–1.51) |
| Niigata          | 1963        | 1.19<br>(0.97–1.41) |
| Niigata          | 1964        | 1.14<br>(0.93–1.36) |
| Niigata          | 1965        | 1.1<br>(0.89–1.32)  |
| Niigata          | 1966        | 1.05<br>(0.86–1.25) |
| Niigata          | 1967        | 1.15<br>(0.95–1.37) |
| Niigata          | 1968        | 1.07<br>(0.89–1.27) |
| Niigata          | 1969        | 1.12<br>(0.94–1.31) |
| Niigata          | 1970        | 1.13<br>(0.95–1.32) |
| Niigata          | 1971        | 1.11<br>(0.95–1.3)  |
| Niigata          | 1972        | 1.11<br>(0.96–1.29) |
| Niigata          | 1973        | 1.15<br>(1.0–1.32)  |
| Niigata          | 1974        | 1.11<br>(0.98–1.26) |
| Niigata          | 1975        | 1.07<br>(0.95–1.19) |
| Niigata          | 1976        | 1.05<br>(0.95–1.16) |
| Niigata          | 1977        | 1.04<br>(0.96–1.12) |
| Niigata          | 1978        | 1.03<br>(0.97–1.09) |
| Niigata          | 1979        | 1.01<br>(0.97–1.05) |
| Niigata          | 1980        | 1.0<br>(0.98–1.03)  |
| Niigata          | 1981        | 1.01<br>(0.99–1.04) |
| Niigata          | 1982        | 1.0<br>(0.97–1.02)  |
| Niigata          | 1983        | 1.0<br>(0.97–1.02)  |
| Niigata          | 1984        | 1.01<br>(0.98–1.03) |
| Niigata          | 1985        | 0.98<br>(0.95–1.01) |
| Niigata          | 1986        | 0.99<br>(0.96–1.02) |
| Niigata          | 1987        | 0.98<br>(0.95–1.01) |
| Niigata          | 1988        | 0.98<br>(0.95–1.01) |
| Niigata          | 1989        | 0.97<br>(0.94–1.0)  |
| Niigata          | 1990        | 1.01<br>(0.97–1.04) |
| Niigata          | 1991        | 0.99<br>(0.96–1.02) |
| Niigata          | 1992        | 1.02<br>(0.99–1.05) |

**Table 15 Ratio of adjusted to unadjusted 5q0 values for scaled locations by year**

| <b>Geography</b> | <b>Year</b> | <b>Ratio</b>        |
|------------------|-------------|---------------------|
| Niigata          | 1993        | 1.02<br>(0.99–1.06) |
| Niigata          | 1994        | 1.03<br>(0.99–1.06) |
| Niigata          | 1995        | 1.03<br>(0.99–1.06) |
| Niigata          | 1996        | 0.99<br>(0.96–1.02) |
| Niigata          | 1997        | 0.99<br>(0.96–1.03) |
| Niigata          | 1998        | 1.03<br>(1.0–1.07)  |
| Niigata          | 1999        | 0.99<br>(0.96–1.03) |
| Niigata          | 2000        | 0.99<br>(0.95–1.02) |
| Niigata          | 2001        | 0.97<br>(0.93–1.01) |
| Niigata          | 2002        | 0.98<br>(0.94–1.02) |
| Niigata          | 2003        | 0.98<br>(0.94–1.02) |
| Niigata          | 2004        | 0.98<br>(0.94–1.02) |
| Niigata          | 2005        | 0.99<br>(0.95–1.03) |
| Niigata          | 2006        | 0.99<br>(0.95–1.03) |
| Niigata          | 2007        | 0.99<br>(0.94–1.03) |
| Niigata          | 2008        | 1.0<br>(0.97–1.04)  |
| Niigata          | 2009        | 0.98<br>(0.93–1.02) |
| Niigata          | 2010        | 0.99<br>(0.95–1.04) |
| Niigata          | 2011        | 1.0<br>(0.97–1.03)  |
| Niigata          | 2012        | 1.01<br>(0.96–1.06) |
| Niigata          | 2013        | 0.99<br>(0.93–1.04) |
| Niigata          | 2014        | 0.99<br>(0.95–1.04) |
| Niigata          | 2015        | 0.97<br>(0.93–1.02) |
| Niigata          | 2016        | 0.97<br>(0.86–1.09) |
| Niigata          | 2017        | 0.96<br>(0.81–1.13) |
| Ōita             | 1950        | 1.61<br>(1.33–1.93) |
| Ōita             | 1951        | 1.59<br>(1.31–1.89) |
| Ōita             | 1952        | 1.41<br>(1.17–1.67) |
| Ōita             | 1953        | 1.42<br>(1.18–1.67) |
| Ōita             | 1954        | 1.37<br>(1.15–1.61) |
| Ōita             | 1955        | 1.26<br>(1.07–1.48) |

**Table 15 Ratio of adjusted to unadjusted 5q0 values for scaled locations by year**

| <b>Geography</b> | <b>Year</b> | <b>Ratio</b>        |
|------------------|-------------|---------------------|
| Ōīta             | 1956        | 1.33<br>(1.12–1.55) |
| Ōīta             | 1957        | 1.37<br>(1.16–1.59) |
| Ōīta             | 1958        | 1.3<br>(1.1–1.51)   |
| Ōīta             | 1959        | 1.31<br>(1.11–1.53) |
| Ōīta             | 1960        | 1.28<br>(1.07–1.49) |
| Ōīta             | 1961        | 1.27<br>(1.07–1.49) |
| Ōīta             | 1962        | 1.27<br>(1.05–1.51) |
| Ōīta             | 1963        | 1.19<br>(0.97–1.41) |
| Ōīta             | 1964        | 1.14<br>(0.93–1.36) |
| Ōīta             | 1965        | 1.1<br>(0.89–1.32)  |
| Ōīta             | 1966        | 1.05<br>(0.86–1.25) |
| Ōīta             | 1967        | 1.15<br>(0.95–1.37) |
| Ōīta             | 1968        | 1.07<br>(0.89–1.27) |
| Ōīta             | 1969        | 1.12<br>(0.94–1.31) |
| Ōīta             | 1970        | 1.13<br>(0.95–1.32) |
| Ōīta             | 1971        | 1.11<br>(0.95–1.3)  |
| Ōīta             | 1972        | 1.11<br>(0.96–1.29) |
| Ōīta             | 1973        | 1.15<br>(1.0–1.32)  |
| Ōīta             | 1974        | 1.11<br>(0.98–1.26) |
| Ōīta             | 1975        | 1.07<br>(0.95–1.19) |
| Ōīta             | 1976        | 1.05<br>(0.95–1.16) |
| Ōīta             | 1977        | 1.04<br>(0.96–1.12) |
| Ōīta             | 1978        | 1.03<br>(0.97–1.09) |
| Ōīta             | 1979        | 1.01<br>(0.97–1.05) |
| Ōīta             | 1980        | 1.0<br>(0.98–1.03)  |
| Ōīta             | 1981        | 1.01<br>(0.99–1.04) |
| Ōīta             | 1982        | 1.0<br>(0.97–1.02)  |
| Ōīta             | 1983        | 1.0<br>(0.97–1.02)  |
| Ōīta             | 1984        | 1.01<br>(0.98–1.03) |
| Ōīta             | 1985        | 0.98<br>(0.95–1.01) |
| Ōīta             | 1986        | 0.99<br>(0.96–1.02) |

**Table 15 Ratio of adjusted to unadjusted 5q0 values for scaled locations by year**

| <b>Geography</b> | <b>Year</b> | <b>Ratio</b>        |
|------------------|-------------|---------------------|
| Ōīta             | 1987        | 0.98<br>(0.95–1.01) |
| Ōīta             | 1988        | 0.98<br>(0.95–1.01) |
| Ōīta             | 1989        | 0.97<br>(0.94–1.0)  |
| Ōīta             | 1990        | 1.01<br>(0.97–1.03) |
| Ōīta             | 1991        | 0.99<br>(0.96–1.02) |
| Ōīta             | 1992        | 1.02<br>(0.99–1.05) |
| Ōīta             | 1993        | 1.02<br>(0.99–1.06) |
| Ōīta             | 1994        | 1.03<br>(0.99–1.06) |
| Ōīta             | 1995        | 1.03<br>(0.99–1.06) |
| Ōīta             | 1996        | 0.99<br>(0.96–1.02) |
| Ōīta             | 1997        | 0.99<br>(0.96–1.03) |
| Ōīta             | 1998        | 1.03<br>(1.0–1.07)  |
| Ōīta             | 1999        | 0.99<br>(0.96–1.03) |
| Ōīta             | 2000        | 0.99<br>(0.95–1.02) |
| Ōīta             | 2001        | 0.97<br>(0.93–1.01) |
| Ōīta             | 2002        | 0.98<br>(0.94–1.02) |
| Ōīta             | 2003        | 0.98<br>(0.94–1.02) |
| Ōīta             | 2004        | 0.98<br>(0.94–1.02) |
| Ōīta             | 2005        | 0.99<br>(0.95–1.03) |
| Ōīta             | 2006        | 0.99<br>(0.95–1.03) |
| Ōīta             | 2007        | 0.99<br>(0.94–1.03) |
| Ōīta             | 2008        | 1.0<br>(0.97–1.04)  |
| Ōīta             | 2009        | 0.98<br>(0.93–1.02) |
| Ōīta             | 2010        | 0.99<br>(0.95–1.04) |
| Ōīta             | 2011        | 1.0<br>(0.97–1.03)  |
| Ōīta             | 2012        | 1.01<br>(0.96–1.06) |
| Ōīta             | 2013        | 0.99<br>(0.93–1.04) |
| Ōīta             | 2014        | 0.99<br>(0.95–1.04) |
| Ōīta             | 2015        | 0.97<br>(0.93–1.02) |
| Ōīta             | 2016        | 0.97<br>(0.86–1.09) |
| Ōīta             | 2017        | 0.96<br>(0.81–1.13) |

**Table 15 Ratio of adjusted to unadjusted 5q0 values for scaled locations by year**

| <b>Geography</b> | <b>Year</b> | <b>Ratio</b>        |
|------------------|-------------|---------------------|
| Okayama          | 1950        | 1.61<br>(1.33–1.93) |
| Okayama          | 1951        | 1.59<br>(1.31–1.9)  |
| Okayama          | 1952        | 1.41<br>(1.17–1.67) |
| Okayama          | 1953        | 1.42<br>(1.18–1.68) |
| Okayama          | 1954        | 1.37<br>(1.15–1.61) |
| Okayama          | 1955        | 1.27<br>(1.07–1.48) |
| Okayama          | 1956        | 1.33<br>(1.12–1.56) |
| Okayama          | 1957        | 1.37<br>(1.16–1.6)  |
| Okayama          | 1958        | 1.3<br>(1.1–1.52)   |
| Okayama          | 1959        | 1.31<br>(1.11–1.53) |
| Okayama          | 1960        | 1.28<br>(1.07–1.49) |
| Okayama          | 1961        | 1.27<br>(1.07–1.5)  |
| Okayama          | 1962        | 1.27<br>(1.05–1.51) |
| Okayama          | 1963        | 1.19<br>(0.97–1.41) |
| Okayama          | 1964        | 1.14<br>(0.93–1.36) |
| Okayama          | 1965        | 1.1<br>(0.89–1.32)  |
| Okayama          | 1966        | 1.05<br>(0.86–1.25) |
| Okayama          | 1967        | 1.15<br>(0.95–1.37) |
| Okayama          | 1968        | 1.07<br>(0.89–1.27) |
| Okayama          | 1969        | 1.12<br>(0.94–1.31) |
| Okayama          | 1970        | 1.13<br>(0.95–1.32) |
| Okayama          | 1971        | 1.11<br>(0.95–1.3)  |
| Okayama          | 1972        | 1.11<br>(0.95–1.29) |
| Okayama          | 1973        | 1.15<br>(1.0–1.32)  |
| Okayama          | 1974        | 1.11<br>(0.98–1.26) |
| Okayama          | 1975        | 1.07<br>(0.95–1.19) |
| Okayama          | 1976        | 1.05<br>(0.95–1.16) |
| Okayama          | 1977        | 1.04<br>(0.96–1.12) |
| Okayama          | 1978        | 1.03<br>(0.97–1.09) |
| Okayama          | 1979        | 1.01<br>(0.97–1.05) |
| Okayama          | 1980        | 1.0<br>(0.98–1.03)  |

**Table 15 Ratio of adjusted to unadjusted 5q0 values for scaled locations by year**

| <b>Geography</b> | <b>Year</b> | <b>Ratio</b>        |
|------------------|-------------|---------------------|
| Okayama          | 1981        | 1.01<br>(0.99–1.04) |
| Okayama          | 1982        | 1.0<br>(0.97–1.02)  |
| Okayama          | 1983        | 1.0<br>(0.97–1.02)  |
| Okayama          | 1984        | 1.01<br>(0.98–1.03) |
| Okayama          | 1985        | 0.98<br>(0.95–1.01) |
| Okayama          | 1986        | 0.99<br>(0.96–1.02) |
| Okayama          | 1987        | 0.98<br>(0.95–1.01) |
| Okayama          | 1988        | 0.98<br>(0.95–1.01) |
| Okayama          | 1989        | 0.97<br>(0.94–1.0)  |
| Okayama          | 1990        | 1.01<br>(0.97–1.03) |
| Okayama          | 1991        | 0.99<br>(0.96–1.02) |
| Okayama          | 1992        | 1.02<br>(0.99–1.05) |
| Okayama          | 1993        | 1.02<br>(0.99–1.06) |
| Okayama          | 1994        | 1.03<br>(0.99–1.06) |
| Okayama          | 1995        | 1.03<br>(0.99–1.06) |
| Okayama          | 1996        | 0.99<br>(0.96–1.02) |
| Okayama          | 1997        | 0.99<br>(0.96–1.03) |
| Okayama          | 1998        | 1.03<br>(1.0–1.07)  |
| Okayama          | 1999        | 0.99<br>(0.96–1.03) |
| Okayama          | 2000        | 0.99<br>(0.95–1.02) |
| Okayama          | 2001        | 0.97<br>(0.93–1.01) |
| Okayama          | 2002        | 0.98<br>(0.94–1.02) |
| Okayama          | 2003        | 0.98<br>(0.94–1.02) |
| Okayama          | 2004        | 0.98<br>(0.94–1.02) |
| Okayama          | 2005        | 0.99<br>(0.95–1.03) |
| Okayama          | 2006        | 0.99<br>(0.95–1.03) |
| Okayama          | 2007        | 0.99<br>(0.94–1.03) |
| Okayama          | 2008        | 1.0<br>(0.97–1.04)  |
| Okayama          | 2009        | 0.98<br>(0.93–1.02) |
| Okayama          | 2010        | 0.99<br>(0.95–1.04) |
| Okayama          | 2011        | 1.0<br>(0.97–1.03)  |



**Table 15 Ratio of adjusted to unadjusted 5q0 values for scaled locations by year**

| <b>Geography</b> | <b>Year</b> | <b>Ratio</b>        |
|------------------|-------------|---------------------|
| Okayama          | 2012        | 1.01<br>(0.96–1.06) |
| Okayama          | 2013        | 0.99<br>(0.93–1.04) |
| Okayama          | 2014        | 0.99<br>(0.95–1.04) |
| Okayama          | 2015        | 0.97<br>(0.93–1.02) |
| Okayama          | 2016        | 0.97<br>(0.86–1.09) |
| Okayama          | 2017        | 0.96<br>(0.81–1.13) |
| Okinawa          | 1950        | 1.61<br>(1.33–1.93) |
| Okinawa          | 1951        | 1.59<br>(1.31–1.89) |
| Okinawa          | 1952        | 1.41<br>(1.17–1.67) |
| Okinawa          | 1953        | 1.42<br>(1.18–1.67) |
| Okinawa          | 1954        | 1.37<br>(1.15–1.61) |
| Okinawa          | 1955        | 1.26<br>(1.07–1.48) |
| Okinawa          | 1956        | 1.33<br>(1.12–1.55) |
| Okinawa          | 1957        | 1.37<br>(1.16–1.59) |
| Okinawa          | 1958        | 1.3<br>(1.1–1.51)   |
| Okinawa          | 1959        | 1.31<br>(1.11–1.53) |
| Okinawa          | 1960        | 1.28<br>(1.07–1.49) |
| Okinawa          | 1961        | 1.27<br>(1.07–1.49) |
| Okinawa          | 1962        | 1.27<br>(1.05–1.51) |
| Okinawa          | 1963        | 1.19<br>(0.97–1.41) |
| Okinawa          | 1964        | 1.14<br>(0.93–1.36) |
| Okinawa          | 1965        | 1.1<br>(0.89–1.32)  |
| Okinawa          | 1966        | 1.05<br>(0.86–1.25) |
| Okinawa          | 1967        | 1.15<br>(0.95–1.37) |
| Okinawa          | 1968        | 1.07<br>(0.89–1.27) |
| Okinawa          | 1969        | 1.12<br>(0.94–1.31) |
| Okinawa          | 1970        | 1.13<br>(0.95–1.32) |
| Okinawa          | 1971        | 1.11<br>(0.95–1.3)  |
| Okinawa          | 1972        | 1.11<br>(0.96–1.29) |
| Okinawa          | 1973        | 1.15<br>(1.0–1.32)  |
| Okinawa          | 1974        | 1.11<br>(0.98–1.26) |

**Table 15 Ratio of adjusted to unadjusted 5q0 values for scaled locations by year**

| <b>Geography</b> | <b>Year</b> | <b>Ratio</b>        |
|------------------|-------------|---------------------|
| Okinawa          | 1975        | 1.07<br>(0.95–1.19) |
| Okinawa          | 1976        | 1.05<br>(0.95–1.16) |
| Okinawa          | 1977        | 1.04<br>(0.96–1.12) |
| Okinawa          | 1978        | 1.03<br>(0.97–1.09) |
| Okinawa          | 1979        | 1.01<br>(0.97–1.05) |
| Okinawa          | 1980        | 1.0<br>(0.98–1.03)  |
| Okinawa          | 1981        | 1.01<br>(0.99–1.04) |
| Okinawa          | 1982        | 1.0<br>(0.97–1.02)  |
| Okinawa          | 1983        | 1.0<br>(0.97–1.02)  |
| Okinawa          | 1984        | 1.01<br>(0.98–1.03) |
| Okinawa          | 1985        | 0.98<br>(0.95–1.01) |
| Okinawa          | 1986        | 0.99<br>(0.96–1.02) |
| Okinawa          | 1987        | 0.98<br>(0.95–1.01) |
| Okinawa          | 1988        | 0.98<br>(0.95–1.01) |
| Okinawa          | 1989        | 0.97<br>(0.94–1.0)  |
| Okinawa          | 1990        | 1.01<br>(0.97–1.03) |
| Okinawa          | 1991        | 0.99<br>(0.96–1.02) |
| Okinawa          | 1992        | 1.02<br>(0.99–1.05) |
| Okinawa          | 1993        | 1.02<br>(0.99–1.06) |
| Okinawa          | 1994        | 1.03<br>(0.99–1.06) |
| Okinawa          | 1995        | 1.03<br>(0.99–1.06) |
| Okinawa          | 1996        | 0.99<br>(0.96–1.02) |
| Okinawa          | 1997        | 0.99<br>(0.96–1.03) |
| Okinawa          | 1998        | 1.03<br>(1.0–1.07)  |
| Okinawa          | 1999        | 0.99<br>(0.96–1.03) |
| Okinawa          | 2000        | 0.99<br>(0.95–1.02) |
| Okinawa          | 2001        | 0.97<br>(0.93–1.01) |
| Okinawa          | 2002        | 0.98<br>(0.94–1.02) |
| Okinawa          | 2003        | 0.98<br>(0.94–1.02) |
| Okinawa          | 2004        | 0.98<br>(0.94–1.02) |
| Okinawa          | 2005        | 0.99<br>(0.95–1.03) |

**Table 15 Ratio of adjusted to unadjusted 5q0 values for scaled locations by year**

| <b>Geography</b> | <b>Year</b> | <b>Ratio</b>        |
|------------------|-------------|---------------------|
| Okinawa          | 2006        | 0.99<br>(0.95–1.03) |
| Okinawa          | 2007        | 0.99<br>(0.94–1.03) |
| Okinawa          | 2008        | 1.0<br>(0.97–1.04)  |
| Okinawa          | 2009        | 0.98<br>(0.93–1.02) |
| Okinawa          | 2010        | 0.99<br>(0.95–1.04) |
| Okinawa          | 2011        | 1.0<br>(0.97–1.03)  |
| Okinawa          | 2012        | 1.01<br>(0.96–1.06) |
| Okinawa          | 2013        | 0.99<br>(0.93–1.04) |
| Okinawa          | 2014        | 0.99<br>(0.95–1.04) |
| Okinawa          | 2015        | 0.97<br>(0.93–1.02) |
| Okinawa          | 2016        | 0.97<br>(0.86–1.09) |
| Okinawa          | 2017        | 0.96<br>(0.81–1.13) |
| Ōsaka            | 1950        | 1.61<br>(1.33–1.93) |
| Ōsaka            | 1951        | 1.59<br>(1.31–1.9)  |
| Ōsaka            | 1952        | 1.41<br>(1.17–1.67) |
| Ōsaka            | 1953        | 1.42<br>(1.18–1.68) |
| Ōsaka            | 1954        | 1.37<br>(1.15–1.61) |
| Ōsaka            | 1955        | 1.27<br>(1.07–1.49) |
| Ōsaka            | 1956        | 1.33<br>(1.12–1.56) |
| Ōsaka            | 1957        | 1.37<br>(1.16–1.6)  |
| Ōsaka            | 1958        | 1.3<br>(1.1–1.52)   |
| Ōsaka            | 1959        | 1.31<br>(1.11–1.53) |
| Ōsaka            | 1960        | 1.28<br>(1.07–1.49) |
| Ōsaka            | 1961        | 1.27<br>(1.07–1.5)  |
| Ōsaka            | 1962        | 1.27<br>(1.05–1.51) |
| Ōsaka            | 1963        | 1.19<br>(0.97–1.41) |
| Ōsaka            | 1964        | 1.14<br>(0.93–1.36) |
| Ōsaka            | 1965        | 1.1<br>(0.89–1.32)  |
| Ōsaka            | 1966        | 1.05<br>(0.86–1.25) |
| Ōsaka            | 1967        | 1.15<br>(0.95–1.37) |
| Ōsaka            | 1968        | 1.07<br>(0.89–1.27) |

**Table 15 Ratio of adjusted to unadjusted 5q0 values for scaled locations by year**

| <b>Geography</b> | <b>Year</b> | <b>Ratio</b>        |
|------------------|-------------|---------------------|
| Ōsaka            | 1969        | 1.12<br>(0.94–1.31) |
| Ōsaka            | 1970        | 1.13<br>(0.95–1.32) |
| Ōsaka            | 1971        | 1.11<br>(0.95–1.3)  |
| Ōsaka            | 1972        | 1.11<br>(0.95–1.29) |
| Ōsaka            | 1973        | 1.15<br>(1.0–1.32)  |
| Ōsaka            | 1974        | 1.11<br>(0.98–1.26) |
| Ōsaka            | 1975        | 1.07<br>(0.95–1.19) |
| Ōsaka            | 1976        | 1.05<br>(0.95–1.16) |
| Ōsaka            | 1977        | 1.04<br>(0.96–1.12) |
| Ōsaka            | 1978        | 1.03<br>(0.97–1.09) |
| Ōsaka            | 1979        | 1.01<br>(0.97–1.05) |
| Ōsaka            | 1980        | 1.0<br>(0.98–1.03)  |
| Ōsaka            | 1981        | 1.01<br>(0.99–1.04) |
| Ōsaka            | 1982        | 1.0<br>(0.97–1.02)  |
| Ōsaka            | 1983        | 1.0<br>(0.97–1.02)  |
| Ōsaka            | 1984        | 1.01<br>(0.98–1.03) |
| Ōsaka            | 1985        | 0.98<br>(0.95–1.01) |
| Ōsaka            | 1986        | 0.99<br>(0.96–1.02) |
| Ōsaka            | 1987        | 0.98<br>(0.95–1.01) |
| Ōsaka            | 1988        | 0.98<br>(0.95–1.01) |
| Ōsaka            | 1989        | 0.97<br>(0.94–1.0)  |
| Ōsaka            | 1990        | 1.01<br>(0.97–1.03) |
| Ōsaka            | 1991        | 0.99<br>(0.96–1.02) |
| Ōsaka            | 1992        | 1.02<br>(0.99–1.05) |
| Ōsaka            | 1993        | 1.02<br>(0.99–1.06) |
| Ōsaka            | 1994        | 1.03<br>(0.99–1.06) |
| Ōsaka            | 1995        | 1.03<br>(0.99–1.06) |
| Ōsaka            | 1996        | 0.99<br>(0.96–1.02) |
| Ōsaka            | 1997        | 0.99<br>(0.96–1.03) |
| Ōsaka            | 1998        | 1.03<br>(1.0–1.07)  |
| Ōsaka            | 1999        | 0.99<br>(0.96–1.03) |

**Table 15 Ratio of adjusted to unadjusted 5q0 values for scaled locations by year**

| <b>Geography</b> | <b>Year</b> | <b>Ratio</b>        |
|------------------|-------------|---------------------|
| Ōsaka            | 2000        | 0.99<br>(0.95–1.02) |
| Ōsaka            | 2001        | 0.97<br>(0.93–1.01) |
| Ōsaka            | 2002        | 0.98<br>(0.94–1.02) |
| Ōsaka            | 2003        | 0.98<br>(0.94–1.02) |
| Ōsaka            | 2004        | 0.98<br>(0.94–1.02) |
| Ōsaka            | 2005        | 0.99<br>(0.95–1.03) |
| Ōsaka            | 2006        | 0.99<br>(0.95–1.03) |
| Ōsaka            | 2007        | 0.99<br>(0.94–1.03) |
| Ōsaka            | 2008        | 1.0<br>(0.97–1.04)  |
| Ōsaka            | 2009        | 0.98<br>(0.93–1.02) |
| Ōsaka            | 2010        | 0.99<br>(0.95–1.04) |
| Ōsaka            | 2011        | 1.0<br>(0.97–1.03)  |
| Ōsaka            | 2012        | 1.01<br>(0.96–1.06) |
| Ōsaka            | 2013        | 0.99<br>(0.93–1.04) |
| Ōsaka            | 2014        | 0.99<br>(0.95–1.04) |
| Ōsaka            | 2015        | 0.97<br>(0.93–1.02) |
| Ōsaka            | 2016        | 0.97<br>(0.86–1.09) |
| Ōsaka            | 2017        | 0.96<br>(0.81–1.13) |
| Saga             | 1950        | 1.61<br>(1.33–1.93) |
| Saga             | 1951        | 1.59<br>(1.31–1.89) |
| Saga             | 1952        | 1.41<br>(1.17–1.67) |
| Saga             | 1953        | 1.42<br>(1.18–1.67) |
| Saga             | 1954        | 1.37<br>(1.15–1.61) |
| Saga             | 1955        | 1.26<br>(1.07–1.48) |
| Saga             | 1956        | 1.33<br>(1.12–1.55) |
| Saga             | 1957        | 1.37<br>(1.16–1.59) |
| Saga             | 1958        | 1.3<br>(1.1–1.51)   |
| Saga             | 1959        | 1.31<br>(1.11–1.53) |
| Saga             | 1960        | 1.28<br>(1.07–1.49) |
| Saga             | 1961        | 1.27<br>(1.07–1.49) |
| Saga             | 1962        | 1.27<br>(1.05–1.51) |

**Table 15 Ratio of adjusted to unadjusted 5q0 values for scaled locations by year**

| <b>Geography</b> | <b>Year</b> | <b>Ratio</b>        |
|------------------|-------------|---------------------|
| Saga             | 1963        | 1.19<br>(0.97–1.41) |
| Saga             | 1964        | 1.14<br>(0.93–1.36) |
| Saga             | 1965        | 1.1<br>(0.89–1.32)  |
| Saga             | 1966        | 1.05<br>(0.86–1.25) |
| Saga             | 1967        | 1.15<br>(0.95–1.37) |
| Saga             | 1968        | 1.07<br>(0.89–1.27) |
| Saga             | 1969        | 1.12<br>(0.94–1.31) |
| Saga             | 1970        | 1.13<br>(0.95–1.32) |
| Saga             | 1971        | 1.11<br>(0.95–1.3)  |
| Saga             | 1972        | 1.11<br>(0.96–1.29) |
| Saga             | 1973        | 1.15<br>(1.0–1.32)  |
| Saga             | 1974        | 1.11<br>(0.98–1.26) |
| Saga             | 1975        | 1.07<br>(0.95–1.19) |
| Saga             | 1976        | 1.05<br>(0.95–1.16) |
| Saga             | 1977        | 1.04<br>(0.96–1.12) |
| Saga             | 1978        | 1.03<br>(0.97–1.09) |
| Saga             | 1979        | 1.01<br>(0.97–1.05) |
| Saga             | 1980        | 1.0<br>(0.98–1.03)  |
| Saga             | 1981        | 1.01<br>(0.99–1.04) |
| Saga             | 1982        | 1.0<br>(0.97–1.02)  |
| Saga             | 1983        | 1.0<br>(0.97–1.02)  |
| Saga             | 1984        | 1.01<br>(0.98–1.03) |
| Saga             | 1985        | 0.98<br>(0.95–1.01) |
| Saga             | 1986        | 0.99<br>(0.96–1.02) |
| Saga             | 1987        | 0.98<br>(0.95–1.01) |
| Saga             | 1988        | 0.98<br>(0.95–1.01) |
| Saga             | 1989        | 0.97<br>(0.94–1.0)  |
| Saga             | 1990        | 1.01<br>(0.97–1.03) |
| Saga             | 1991        | 0.99<br>(0.96–1.02) |
| Saga             | 1992        | 1.02<br>(0.99–1.05) |
| Saga             | 1993        | 1.02<br>(0.99–1.06) |

**Table 15 Ratio of adjusted to unadjusted 5q0 values for scaled locations by year**

| <b>Geography</b> | <b>Year</b> | <b>Ratio</b>        |
|------------------|-------------|---------------------|
| Saga             | 1994        | 1.03<br>(0.99–1.06) |
| Saga             | 1995        | 1.03<br>(0.99–1.06) |
| Saga             | 1996        | 0.99<br>(0.96–1.02) |
| Saga             | 1997        | 0.99<br>(0.96–1.03) |
| Saga             | 1998        | 1.03<br>(1.0–1.07)  |
| Saga             | 1999        | 0.99<br>(0.96–1.03) |
| Saga             | 2000        | 0.99<br>(0.95–1.02) |
| Saga             | 2001        | 0.97<br>(0.93–1.01) |
| Saga             | 2002        | 0.98<br>(0.94–1.02) |
| Saga             | 2003        | 0.98<br>(0.94–1.02) |
| Saga             | 2004        | 0.98<br>(0.94–1.02) |
| Saga             | 2005        | 0.99<br>(0.95–1.03) |
| Saga             | 2006        | 0.99<br>(0.95–1.03) |
| Saga             | 2007        | 0.99<br>(0.94–1.03) |
| Saga             | 2008        | 1.0<br>(0.97–1.04)  |
| Saga             | 2009        | 0.98<br>(0.93–1.02) |
| Saga             | 2010        | 0.99<br>(0.95–1.04) |
| Saga             | 2011        | 1.0<br>(0.97–1.03)  |
| Saga             | 2012        | 1.01<br>(0.96–1.06) |
| Saga             | 2013        | 0.99<br>(0.93–1.04) |
| Saga             | 2014        | 0.99<br>(0.95–1.04) |
| Saga             | 2015        | 0.97<br>(0.93–1.02) |
| Saga             | 2016        | 0.97<br>(0.86–1.09) |
| Saga             | 2017        | 0.96<br>(0.81–1.13) |
| Saitama          | 1950        | 1.61<br>(1.33–1.93) |
| Saitama          | 1951        | 1.59<br>(1.31–1.9)  |
| Saitama          | 1952        | 1.41<br>(1.17–1.67) |
| Saitama          | 1953        | 1.42<br>(1.18–1.68) |
| Saitama          | 1954        | 1.37<br>(1.15–1.61) |
| Saitama          | 1955        | 1.26<br>(1.07–1.48) |
| Saitama          | 1956        | 1.33<br>(1.12–1.56) |

**Table 15 Ratio of adjusted to unadjusted 5q0 values for scaled locations by year**

| <b>Geography</b> | <b>Year</b> | <b>Ratio</b>        |
|------------------|-------------|---------------------|
| Saitama          | 1957        | 1.37<br>(1.16–1.6)  |
| Saitama          | 1958        | 1.3<br>(1.1–1.52)   |
| Saitama          | 1959        | 1.31<br>(1.11–1.53) |
| Saitama          | 1960        | 1.28<br>(1.07–1.49) |
| Saitama          | 1961        | 1.27<br>(1.07–1.5)  |
| Saitama          | 1962        | 1.27<br>(1.05–1.51) |
| Saitama          | 1963        | 1.19<br>(0.97–1.41) |
| Saitama          | 1964        | 1.14<br>(0.93–1.36) |
| Saitama          | 1965        | 1.1<br>(0.89–1.32)  |
| Saitama          | 1966        | 1.05<br>(0.86–1.25) |
| Saitama          | 1967        | 1.15<br>(0.95–1.37) |
| Saitama          | 1968        | 1.07<br>(0.89–1.27) |
| Saitama          | 1969        | 1.12<br>(0.94–1.31) |
| Saitama          | 1970        | 1.13<br>(0.95–1.32) |
| Saitama          | 1971        | 1.11<br>(0.95–1.3)  |
| Saitama          | 1972        | 1.11<br>(0.95–1.29) |
| Saitama          | 1973        | 1.15<br>(1.0–1.32)  |
| Saitama          | 1974        | 1.11<br>(0.98–1.26) |
| Saitama          | 1975        | 1.07<br>(0.95–1.19) |
| Saitama          | 1976        | 1.05<br>(0.95–1.16) |
| Saitama          | 1977        | 1.04<br>(0.96–1.12) |
| Saitama          | 1978        | 1.03<br>(0.97–1.09) |
| Saitama          | 1979        | 1.01<br>(0.97–1.05) |
| Saitama          | 1980        | 1.0<br>(0.98–1.03)  |
| Saitama          | 1981        | 1.01<br>(0.99–1.04) |
| Saitama          | 1982        | 1.0<br>(0.97–1.02)  |
| Saitama          | 1983        | 1.0<br>(0.97–1.02)  |
| Saitama          | 1984        | 1.01<br>(0.98–1.03) |
| Saitama          | 1985        | 0.98<br>(0.95–1.01) |
| Saitama          | 1986        | 0.99<br>(0.96–1.02) |
| Saitama          | 1987        | 0.98<br>(0.95–1.01) |



**Table 15 Ratio of adjusted to unadjusted 5q0 values for scaled locations by year**

| <b>Geography</b> | <b>Year</b> | <b>Ratio</b>        |
|------------------|-------------|---------------------|
| Saitama          | 1988        | 0.98<br>(0.95–1.01) |
| Saitama          | 1989        | 0.97<br>(0.94–1.0)  |
| Saitama          | 1990        | 1.01<br>(0.97–1.03) |
| Saitama          | 1991        | 0.99<br>(0.96–1.02) |
| Saitama          | 1992        | 1.02<br>(0.99–1.05) |
| Saitama          | 1993        | 1.02<br>(0.99–1.06) |
| Saitama          | 1994        | 1.03<br>(0.99–1.06) |
| Saitama          | 1995        | 1.03<br>(0.99–1.06) |
| Saitama          | 1996        | 0.99<br>(0.96–1.02) |
| Saitama          | 1997        | 0.99<br>(0.96–1.03) |
| Saitama          | 1998        | 1.03<br>(1.0–1.07)  |
| Saitama          | 1999        | 0.99<br>(0.96–1.03) |
| Saitama          | 2000        | 0.99<br>(0.95–1.02) |
| Saitama          | 2001        | 0.97<br>(0.93–1.01) |
| Saitama          | 2002        | 0.98<br>(0.94–1.02) |
| Saitama          | 2003        | 0.98<br>(0.94–1.02) |
| Saitama          | 2004        | 0.98<br>(0.94–1.02) |
| Saitama          | 2005        | 0.99<br>(0.95–1.03) |
| Saitama          | 2006        | 0.99<br>(0.95–1.03) |
| Saitama          | 2007        | 0.99<br>(0.94–1.03) |
| Saitama          | 2008        | 1.0<br>(0.97–1.04)  |
| Saitama          | 2009        | 0.98<br>(0.93–1.02) |
| Saitama          | 2010        | 0.99<br>(0.95–1.04) |
| Saitama          | 2011        | 1.0<br>(0.97–1.03)  |
| Saitama          | 2012        | 1.01<br>(0.96–1.06) |
| Saitama          | 2013        | 0.99<br>(0.93–1.04) |
| Saitama          | 2014        | 0.99<br>(0.95–1.04) |
| Saitama          | 2015        | 0.97<br>(0.93–1.02) |
| Saitama          | 2016        | 0.97<br>(0.86–1.09) |
| Saitama          | 2017        | 0.96<br>(0.81–1.13) |
| Shiga            | 1950        | 1.61<br>(1.33–1.93) |

**Table 15 Ratio of adjusted to unadjusted 5q0 values for scaled locations by year**

| <b>Geography</b> | <b>Year</b> | <b>Ratio</b>        |
|------------------|-------------|---------------------|
| Shiga            | 1951        | 1.59<br>(1.31–1.9)  |
| Shiga            | 1952        | 1.41<br>(1.17–1.67) |
| Shiga            | 1953        | 1.42<br>(1.18–1.68) |
| Shiga            | 1954        | 1.37<br>(1.15–1.61) |
| Shiga            | 1955        | 1.26<br>(1.07–1.48) |
| Shiga            | 1956        | 1.33<br>(1.12–1.56) |
| Shiga            | 1957        | 1.37<br>(1.16–1.6)  |
| Shiga            | 1958        | 1.3<br>(1.1–1.52)   |
| Shiga            | 1959        | 1.31<br>(1.11–1.53) |
| Shiga            | 1960        | 1.28<br>(1.07–1.49) |
| Shiga            | 1961        | 1.27<br>(1.07–1.5)  |
| Shiga            | 1962        | 1.27<br>(1.05–1.51) |
| Shiga            | 1963        | 1.19<br>(0.97–1.41) |
| Shiga            | 1964        | 1.14<br>(0.93–1.36) |
| Shiga            | 1965        | 1.1<br>(0.89–1.32)  |
| Shiga            | 1966        | 1.05<br>(0.86–1.25) |
| Shiga            | 1967        | 1.15<br>(0.95–1.37) |
| Shiga            | 1968        | 1.07<br>(0.89–1.27) |
| Shiga            | 1969        | 1.12<br>(0.94–1.31) |
| Shiga            | 1970        | 1.13<br>(0.95–1.32) |
| Shiga            | 1971        | 1.11<br>(0.95–1.3)  |
| Shiga            | 1972        | 1.11<br>(0.96–1.29) |
| Shiga            | 1973        | 1.15<br>(1.0–1.32)  |
| Shiga            | 1974        | 1.11<br>(0.98–1.26) |
| Shiga            | 1975        | 1.07<br>(0.95–1.19) |
| Shiga            | 1976        | 1.05<br>(0.95–1.16) |
| Shiga            | 1977        | 1.04<br>(0.96–1.12) |
| Shiga            | 1978        | 1.03<br>(0.97–1.09) |
| Shiga            | 1979        | 1.01<br>(0.97–1.05) |
| Shiga            | 1980        | 1.0<br>(0.98–1.03)  |
| Shiga            | 1981        | 1.01<br>(0.99–1.04) |

**Table 15 Ratio of adjusted to unadjusted 5q0 values for scaled locations by year**

| <b>Geography</b> | <b>Year</b> | <b>Ratio</b>        |
|------------------|-------------|---------------------|
| Shiga            | 1982        | 1.0<br>(0.97–1.02)  |
| Shiga            | 1983        | 1.0<br>(0.97–1.02)  |
| Shiga            | 1984        | 1.01<br>(0.98–1.03) |
| Shiga            | 1985        | 0.98<br>(0.95–1.01) |
| Shiga            | 1986        | 0.99<br>(0.96–1.02) |
| Shiga            | 1987        | 0.98<br>(0.95–1.01) |
| Shiga            | 1988        | 0.98<br>(0.95–1.01) |
| Shiga            | 1989        | 0.97<br>(0.94–1.0)  |
| Shiga            | 1990        | 1.01<br>(0.97–1.03) |
| Shiga            | 1991        | 0.99<br>(0.96–1.02) |
| Shiga            | 1992        | 1.02<br>(0.99–1.05) |
| Shiga            | 1993        | 1.02<br>(0.99–1.06) |
| Shiga            | 1994        | 1.03<br>(0.99–1.06) |
| Shiga            | 1995        | 1.03<br>(0.99–1.06) |
| Shiga            | 1996        | 0.99<br>(0.96–1.02) |
| Shiga            | 1997        | 0.99<br>(0.96–1.03) |
| Shiga            | 1998        | 1.03<br>(1.0–1.07)  |
| Shiga            | 1999        | 0.99<br>(0.96–1.03) |
| Shiga            | 2000        | 0.99<br>(0.95–1.02) |
| Shiga            | 2001        | 0.97<br>(0.93–1.01) |
| Shiga            | 2002        | 0.98<br>(0.94–1.02) |
| Shiga            | 2003        | 0.98<br>(0.94–1.02) |
| Shiga            | 2004        | 0.98<br>(0.94–1.02) |
| Shiga            | 2005        | 0.99<br>(0.95–1.03) |
| Shiga            | 2006        | 0.99<br>(0.95–1.03) |
| Shiga            | 2007        | 0.99<br>(0.94–1.03) |
| Shiga            | 2008        | 1.0<br>(0.97–1.04)  |
| Shiga            | 2009        | 0.98<br>(0.93–1.02) |
| Shiga            | 2010        | 0.99<br>(0.95–1.04) |
| Shiga            | 2011        | 1.0<br>(0.97–1.03)  |
| Shiga            | 2012        | 1.01<br>(0.96–1.06) |

**Table 15 Ratio of adjusted to unadjusted 5q0 values for scaled locations by year**

| <b>Geography</b> | <b>Year</b> | <b>Ratio</b>        |
|------------------|-------------|---------------------|
| Shiga            | 2013        | 0.99<br>(0.93–1.04) |
| Shiga            | 2014        | 0.99<br>(0.95–1.04) |
| Shiga            | 2015        | 0.97<br>(0.93–1.02) |
| Shiga            | 2016        | 0.97<br>(0.86–1.09) |
| Shiga            | 2017        | 0.96<br>(0.81–1.13) |
| Shimane          | 1950        | 1.61<br>(1.33–1.93) |
| Shimane          | 1951        | 1.59<br>(1.31–1.9)  |
| Shimane          | 1952        | 1.41<br>(1.17–1.67) |
| Shimane          | 1953        | 1.42<br>(1.18–1.67) |
| Shimane          | 1954        | 1.37<br>(1.15–1.61) |
| Shimane          | 1955        | 1.26<br>(1.07–1.48) |
| Shimane          | 1956        | 1.33<br>(1.12–1.55) |
| Shimane          | 1957        | 1.37<br>(1.16–1.59) |
| Shimane          | 1958        | 1.3<br>(1.1–1.52)   |
| Shimane          | 1959        | 1.31<br>(1.11–1.53) |
| Shimane          | 1960        | 1.28<br>(1.07–1.49) |
| Shimane          | 1961        | 1.27<br>(1.07–1.5)  |
| Shimane          | 1962        | 1.27<br>(1.05–1.51) |
| Shimane          | 1963        | 1.19<br>(0.97–1.41) |
| Shimane          | 1964        | 1.14<br>(0.93–1.36) |
| Shimane          | 1965        | 1.1<br>(0.89–1.32)  |
| Shimane          | 1966        | 1.05<br>(0.86–1.25) |
| Shimane          | 1967        | 1.15<br>(0.95–1.37) |
| Shimane          | 1968        | 1.07<br>(0.89–1.27) |
| Shimane          | 1969        | 1.12<br>(0.94–1.31) |
| Shimane          | 1970        | 1.13<br>(0.95–1.32) |
| Shimane          | 1971        | 1.11<br>(0.95–1.3)  |
| Shimane          | 1972        | 1.11<br>(0.96–1.29) |
| Shimane          | 1973        | 1.15<br>(1.0–1.32)  |
| Shimane          | 1974        | 1.11<br>(0.98–1.26) |
| Shimane          | 1975        | 1.07<br>(0.95–1.19) |

**Table 15 Ratio of adjusted to unadjusted 5q0 values for scaled locations by year**

| <b>Geography</b> | <b>Year</b> | <b>Ratio</b>        |
|------------------|-------------|---------------------|
| Shimane          | 1976        | 1.05<br>(0.95–1.16) |
| Shimane          | 1977        | 1.04<br>(0.96–1.12) |
| Shimane          | 1978        | 1.03<br>(0.97–1.09) |
| Shimane          | 1979        | 1.01<br>(0.97–1.05) |
| Shimane          | 1980        | 1.0<br>(0.98–1.03)  |
| Shimane          | 1981        | 1.01<br>(0.99–1.04) |
| Shimane          | 1982        | 1.0<br>(0.97–1.02)  |
| Shimane          | 1983        | 1.0<br>(0.97–1.02)  |
| Shimane          | 1984        | 1.01<br>(0.98–1.03) |
| Shimane          | 1985        | 0.98<br>(0.95–1.01) |
| Shimane          | 1986        | 0.99<br>(0.96–1.02) |
| Shimane          | 1987        | 0.98<br>(0.95–1.01) |
| Shimane          | 1988        | 0.98<br>(0.95–1.01) |
| Shimane          | 1989        | 0.97<br>(0.94–1.0)  |
| Shimane          | 1990        | 1.01<br>(0.97–1.03) |
| Shimane          | 1991        | 0.99<br>(0.96–1.02) |
| Shimane          | 1992        | 1.02<br>(0.99–1.05) |
| Shimane          | 1993        | 1.02<br>(0.99–1.06) |
| Shimane          | 1994        | 1.03<br>(0.99–1.06) |
| Shimane          | 1995        | 1.03<br>(0.99–1.06) |
| Shimane          | 1996        | 0.99<br>(0.96–1.02) |
| Shimane          | 1997        | 0.99<br>(0.96–1.03) |
| Shimane          | 1998        | 1.03<br>(1.0–1.07)  |
| Shimane          | 1999        | 0.99<br>(0.96–1.03) |
| Shimane          | 2000        | 0.99<br>(0.95–1.02) |
| Shimane          | 2001        | 0.97<br>(0.93–1.01) |
| Shimane          | 2002        | 0.98<br>(0.94–1.02) |
| Shimane          | 2003        | 0.98<br>(0.94–1.02) |
| Shimane          | 2004        | 0.98<br>(0.94–1.02) |
| Shimane          | 2005        | 0.99<br>(0.95–1.03) |
| Shimane          | 2006        | 0.99<br>(0.95–1.03) |

**Table 15 Ratio of adjusted to unadjusted 5q0 values for scaled locations by year**

| <b>Geography</b> | <b>Year</b> | <b>Ratio</b>        |
|------------------|-------------|---------------------|
| Shimane          | 2007        | 0.99<br>(0.94–1.03) |
| Shimane          | 2008        | 1.0<br>(0.97–1.04)  |
| Shimane          | 2009        | 0.98<br>(0.93–1.02) |
| Shimane          | 2010        | 0.99<br>(0.95–1.04) |
| Shimane          | 2011        | 1.0<br>(0.97–1.03)  |
| Shimane          | 2012        | 1.01<br>(0.96–1.06) |
| Shimane          | 2013        | 0.99<br>(0.93–1.04) |
| Shimane          | 2014        | 0.99<br>(0.95–1.04) |
| Shimane          | 2015        | 0.97<br>(0.93–1.02) |
| Shimane          | 2016        | 0.97<br>(0.86–1.09) |
| Shimane          | 2017        | 0.96<br>(0.81–1.13) |
| Shizuoka         | 1950        | 1.61<br>(1.33–1.93) |
| Shizuoka         | 1951        | 1.59<br>(1.31–1.9)  |
| Shizuoka         | 1952        | 1.41<br>(1.17–1.67) |
| Shizuoka         | 1953        | 1.42<br>(1.18–1.67) |
| Shizuoka         | 1954        | 1.37<br>(1.15–1.61) |
| Shizuoka         | 1955        | 1.27<br>(1.07–1.48) |
| Shizuoka         | 1956        | 1.33<br>(1.12–1.56) |
| Shizuoka         | 1957        | 1.37<br>(1.16–1.6)  |
| Shizuoka         | 1958        | 1.3<br>(1.1–1.52)   |
| Shizuoka         | 1959        | 1.31<br>(1.11–1.53) |
| Shizuoka         | 1960        | 1.28<br>(1.07–1.5)  |
| Shizuoka         | 1961        | 1.27<br>(1.07–1.5)  |
| Shizuoka         | 1962        | 1.27<br>(1.05–1.51) |
| Shizuoka         | 1963        | 1.19<br>(0.97–1.41) |
| Shizuoka         | 1964        | 1.14<br>(0.93–1.36) |
| Shizuoka         | 1965        | 1.1<br>(0.89–1.32)  |
| Shizuoka         | 1966        | 1.05<br>(0.86–1.25) |
| Shizuoka         | 1967        | 1.15<br>(0.95–1.37) |
| Shizuoka         | 1968        | 1.07<br>(0.89–1.27) |
| Shizuoka         | 1969        | 1.12<br>(0.94–1.31) |

**Table 15 Ratio of adjusted to unadjusted 5q0 values for scaled locations by year**

| <b>Geography</b> | <b>Year</b> | <b>Ratio</b>        |
|------------------|-------------|---------------------|
| Shizuoka         | 1970        | 1.13<br>(0.95–1.32) |
| Shizuoka         | 1971        | 1.11<br>(0.95–1.3)  |
| Shizuoka         | 1972        | 1.11<br>(0.95–1.29) |
| Shizuoka         | 1973        | 1.15<br>(1.0–1.32)  |
| Shizuoka         | 1974        | 1.11<br>(0.98–1.26) |
| Shizuoka         | 1975        | 1.07<br>(0.95–1.19) |
| Shizuoka         | 1976        | 1.05<br>(0.95–1.16) |
| Shizuoka         | 1977        | 1.04<br>(0.96–1.12) |
| Shizuoka         | 1978        | 1.03<br>(0.97–1.09) |
| Shizuoka         | 1979        | 1.01<br>(0.97–1.05) |
| Shizuoka         | 1980        | 1.0<br>(0.98–1.03)  |
| Shizuoka         | 1981        | 1.01<br>(0.99–1.04) |
| Shizuoka         | 1982        | 1.0<br>(0.97–1.02)  |
| Shizuoka         | 1983        | 1.0<br>(0.97–1.02)  |
| Shizuoka         | 1984        | 1.01<br>(0.98–1.03) |
| Shizuoka         | 1985        | 0.98<br>(0.95–1.01) |
| Shizuoka         | 1986        | 0.99<br>(0.96–1.02) |
| Shizuoka         | 1987        | 0.98<br>(0.95–1.01) |
| Shizuoka         | 1988        | 0.98<br>(0.95–1.01) |
| Shizuoka         | 1989        | 0.97<br>(0.94–1.0)  |
| Shizuoka         | 1990        | 1.01<br>(0.97–1.03) |
| Shizuoka         | 1991        | 0.99<br>(0.96–1.02) |
| Shizuoka         | 1992        | 1.02<br>(0.99–1.05) |
| Shizuoka         | 1993        | 1.02<br>(0.99–1.06) |
| Shizuoka         | 1994        | 1.03<br>(0.99–1.06) |
| Shizuoka         | 1995        | 1.03<br>(0.99–1.06) |
| Shizuoka         | 1996        | 0.99<br>(0.96–1.02) |
| Shizuoka         | 1997        | 0.99<br>(0.96–1.03) |
| Shizuoka         | 1998        | 1.03<br>(1.0–1.07)  |
| Shizuoka         | 1999        | 0.99<br>(0.96–1.03) |
| Shizuoka         | 2000        | 0.99<br>(0.95–1.02) |

**Table 15 Ratio of adjusted to unadjusted 5q0 values for scaled locations by year**

| <b>Geography</b> | <b>Year</b> | <b>Ratio</b>        |
|------------------|-------------|---------------------|
| Shizuoka         | 2001        | 0.97<br>(0.93–1.01) |
| Shizuoka         | 2002        | 0.98<br>(0.94–1.02) |
| Shizuoka         | 2003        | 0.98<br>(0.94–1.02) |
| Shizuoka         | 2004        | 0.98<br>(0.94–1.02) |
| Shizuoka         | 2005        | 0.99<br>(0.95–1.03) |
| Shizuoka         | 2006        | 0.99<br>(0.95–1.03) |
| Shizuoka         | 2007        | 0.99<br>(0.94–1.03) |
| Shizuoka         | 2008        | 1.0<br>(0.97–1.04)  |
| Shizuoka         | 2009        | 0.98<br>(0.93–1.02) |
| Shizuoka         | 2010        | 0.99<br>(0.95–1.04) |
| Shizuoka         | 2011        | 1.0<br>(0.97–1.03)  |
| Shizuoka         | 2012        | 1.01<br>(0.96–1.06) |
| Shizuoka         | 2013        | 0.99<br>(0.93–1.04) |
| Shizuoka         | 2014        | 0.99<br>(0.95–1.04) |
| Shizuoka         | 2015        | 0.97<br>(0.93–1.02) |
| Shizuoka         | 2016        | 0.97<br>(0.86–1.09) |
| Shizuoka         | 2017        | 0.96<br>(0.81–1.13) |
| Tochigi          | 1950        | 1.61<br>(1.33–1.93) |
| Tochigi          | 1951        | 1.59<br>(1.31–1.89) |
| Tochigi          | 1952        | 1.41<br>(1.17–1.67) |
| Tochigi          | 1953        | 1.42<br>(1.18–1.67) |
| Tochigi          | 1954        | 1.37<br>(1.15–1.61) |
| Tochigi          | 1955        | 1.26<br>(1.07–1.48) |
| Tochigi          | 1956        | 1.33<br>(1.12–1.55) |
| Tochigi          | 1957        | 1.37<br>(1.16–1.59) |
| Tochigi          | 1958        | 1.3<br>(1.1–1.51)   |
| Tochigi          | 1959        | 1.31<br>(1.11–1.53) |
| Tochigi          | 1960        | 1.28<br>(1.07–1.49) |
| Tochigi          | 1961        | 1.27<br>(1.07–1.49) |
| Tochigi          | 1962        | 1.27<br>(1.05–1.51) |
| Tochigi          | 1963        | 1.19<br>(0.97–1.41) |



**Table 15 Ratio of adjusted to unadjusted 5q0 values for scaled locations by year**

| <b>Geography</b> | <b>Year</b> | <b>Ratio</b>        |
|------------------|-------------|---------------------|
| Tochigi          | 1964        | 1.14<br>(0.93–1.36) |
| Tochigi          | 1965        | 1.1<br>(0.89–1.32)  |
| Tochigi          | 1966        | 1.05<br>(0.86–1.25) |
| Tochigi          | 1967        | 1.15<br>(0.95–1.37) |
| Tochigi          | 1968        | 1.07<br>(0.89–1.27) |
| Tochigi          | 1969        | 1.12<br>(0.94–1.31) |
| Tochigi          | 1970        | 1.13<br>(0.95–1.32) |
| Tochigi          | 1971        | 1.11<br>(0.95–1.3)  |
| Tochigi          | 1972        | 1.11<br>(0.96–1.29) |
| Tochigi          | 1973        | 1.15<br>(1.0–1.32)  |
| Tochigi          | 1974        | 1.11<br>(0.98–1.26) |
| Tochigi          | 1975        | 1.07<br>(0.95–1.19) |
| Tochigi          | 1976        | 1.05<br>(0.95–1.16) |
| Tochigi          | 1977        | 1.04<br>(0.96–1.12) |
| Tochigi          | 1978        | 1.03<br>(0.97–1.09) |
| Tochigi          | 1979        | 1.01<br>(0.97–1.05) |
| Tochigi          | 1980        | 1.0<br>(0.98–1.03)  |
| Tochigi          | 1981        | 1.01<br>(0.99–1.04) |
| Tochigi          | 1982        | 1.0<br>(0.97–1.02)  |
| Tochigi          | 1983        | 1.0<br>(0.97–1.02)  |
| Tochigi          | 1984        | 1.01<br>(0.98–1.03) |
| Tochigi          | 1985        | 0.98<br>(0.95–1.01) |
| Tochigi          | 1986        | 0.99<br>(0.96–1.02) |
| Tochigi          | 1987        | 0.98<br>(0.95–1.01) |
| Tochigi          | 1988        | 0.98<br>(0.95–1.01) |
| Tochigi          | 1989        | 0.97<br>(0.94–1.0)  |
| Tochigi          | 1990        | 1.01<br>(0.97–1.03) |
| Tochigi          | 1991        | 0.99<br>(0.96–1.02) |
| Tochigi          | 1992        | 1.02<br>(0.99–1.05) |
| Tochigi          | 1993        | 1.02<br>(0.99–1.06) |
| Tochigi          | 1994        | 1.03<br>(0.99–1.06) |

**Table 15 Ratio of adjusted to unadjusted 5q0 values for scaled locations by year**

| <b>Geography</b> | <b>Year</b> | <b>Ratio</b>        |
|------------------|-------------|---------------------|
| Tochigi          | 1995        | 1.03<br>(0.99–1.06) |
| Tochigi          | 1996        | 0.99<br>(0.96–1.02) |
| Tochigi          | 1997        | 0.99<br>(0.96–1.03) |
| Tochigi          | 1998        | 1.03<br>(1.0–1.07)  |
| Tochigi          | 1999        | 0.99<br>(0.96–1.03) |
| Tochigi          | 2000        | 0.99<br>(0.95–1.02) |
| Tochigi          | 2001        | 0.97<br>(0.93–1.01) |
| Tochigi          | 2002        | 0.98<br>(0.94–1.02) |
| Tochigi          | 2003        | 0.98<br>(0.94–1.02) |
| Tochigi          | 2004        | 0.98<br>(0.94–1.02) |
| Tochigi          | 2005        | 0.99<br>(0.95–1.03) |
| Tochigi          | 2006        | 0.99<br>(0.95–1.03) |
| Tochigi          | 2007        | 0.99<br>(0.94–1.03) |
| Tochigi          | 2008        | 1.0<br>(0.97–1.04)  |
| Tochigi          | 2009        | 0.98<br>(0.93–1.02) |
| Tochigi          | 2010        | 0.99<br>(0.95–1.04) |
| Tochigi          | 2011        | 1.0<br>(0.97–1.03)  |
| Tochigi          | 2012        | 1.01<br>(0.96–1.06) |
| Tochigi          | 2013        | 0.99<br>(0.93–1.04) |
| Tochigi          | 2014        | 0.99<br>(0.95–1.04) |
| Tochigi          | 2015        | 0.97<br>(0.93–1.02) |
| Tochigi          | 2016        | 0.97<br>(0.86–1.09) |
| Tochigi          | 2017        | 0.96<br>(0.81–1.13) |
| Tokushima        | 1950        | 1.61<br>(1.33–1.93) |
| Tokushima        | 1951        | 1.59<br>(1.31–1.9)  |
| Tokushima        | 1952        | 1.41<br>(1.17–1.67) |
| Tokushima        | 1953        | 1.42<br>(1.18–1.67) |
| Tokushima        | 1954        | 1.37<br>(1.15–1.61) |
| Tokushima        | 1955        | 1.26<br>(1.07–1.48) |
| Tokushima        | 1956        | 1.33<br>(1.12–1.55) |
| Tokushima        | 1957        | 1.37<br>(1.16–1.59) |

**Table 15 Ratio of adjusted to unadjusted 5q0 values for scaled locations by year**

| <b>Geography</b> | <b>Year</b> | <b>Ratio</b>        |
|------------------|-------------|---------------------|
| Tokushima        | 1958        | 1.3<br>(1.1–1.51)   |
| Tokushima        | 1959        | 1.31<br>(1.11–1.53) |
| Tokushima        | 1960        | 1.28<br>(1.07–1.49) |
| Tokushima        | 1961        | 1.27<br>(1.07–1.49) |
| Tokushima        | 1962        | 1.27<br>(1.05–1.51) |
| Tokushima        | 1963        | 1.19<br>(0.97–1.41) |
| Tokushima        | 1964        | 1.14<br>(0.93–1.36) |
| Tokushima        | 1965        | 1.1<br>(0.89–1.32)  |
| Tokushima        | 1966        | 1.05<br>(0.86–1.25) |
| Tokushima        | 1967        | 1.15<br>(0.95–1.37) |
| Tokushima        | 1968        | 1.07<br>(0.89–1.27) |
| Tokushima        | 1969        | 1.12<br>(0.94–1.31) |
| Tokushima        | 1970        | 1.13<br>(0.95–1.32) |
| Tokushima        | 1971        | 1.11<br>(0.95–1.3)  |
| Tokushima        | 1972        | 1.11<br>(0.96–1.29) |
| Tokushima        | 1973        | 1.15<br>(1.0–1.32)  |
| Tokushima        | 1974        | 1.11<br>(0.98–1.26) |
| Tokushima        | 1975        | 1.07<br>(0.95–1.19) |
| Tokushima        | 1976        | 1.05<br>(0.95–1.16) |
| Tokushima        | 1977        | 1.04<br>(0.96–1.12) |
| Tokushima        | 1978        | 1.03<br>(0.97–1.09) |
| Tokushima        | 1979        | 1.01<br>(0.97–1.05) |
| Tokushima        | 1980        | 1.0<br>(0.98–1.03)  |
| Tokushima        | 1981        | 1.01<br>(0.99–1.04) |
| Tokushima        | 1982        | 1.0<br>(0.97–1.02)  |
| Tokushima        | 1983        | 1.0<br>(0.97–1.02)  |
| Tokushima        | 1984        | 1.01<br>(0.98–1.03) |
| Tokushima        | 1985        | 0.98<br>(0.95–1.01) |
| Tokushima        | 1986        | 0.99<br>(0.96–1.02) |
| Tokushima        | 1987        | 0.98<br>(0.95–1.01) |
| Tokushima        | 1988        | 0.98<br>(0.95–1.01) |

**Table 15 Ratio of adjusted to unadjusted 5q0 values for scaled locations by year**

| <b>Geography</b> | <b>Year</b> | <b>Ratio</b>        |
|------------------|-------------|---------------------|
| Tokushima        | 1989        | 0.97<br>(0.94–1.0)  |
| Tokushima        | 1990        | 1.01<br>(0.97–1.03) |
| Tokushima        | 1991        | 0.99<br>(0.96–1.02) |
| Tokushima        | 1992        | 1.02<br>(0.99–1.05) |
| Tokushima        | 1993        | 1.02<br>(0.99–1.06) |
| Tokushima        | 1994        | 1.03<br>(0.99–1.06) |
| Tokushima        | 1995        | 1.03<br>(0.99–1.06) |
| Tokushima        | 1996        | 0.99<br>(0.96–1.02) |
| Tokushima        | 1997        | 0.99<br>(0.96–1.03) |
| Tokushima        | 1998        | 1.03<br>(1.0–1.07)  |
| Tokushima        | 1999        | 0.99<br>(0.96–1.03) |
| Tokushima        | 2000        | 0.99<br>(0.95–1.02) |
| Tokushima        | 2001        | 0.97<br>(0.93–1.01) |
| Tokushima        | 2002        | 0.98<br>(0.94–1.02) |
| Tokushima        | 2003        | 0.98<br>(0.94–1.02) |
| Tokushima        | 2004        | 0.98<br>(0.94–1.02) |
| Tokushima        | 2005        | 0.99<br>(0.95–1.03) |
| Tokushima        | 2006        | 0.99<br>(0.95–1.03) |
| Tokushima        | 2007        | 0.99<br>(0.94–1.03) |
| Tokushima        | 2008        | 1.0<br>(0.97–1.04)  |
| Tokushima        | 2009        | 0.98<br>(0.93–1.02) |
| Tokushima        | 2010        | 0.99<br>(0.95–1.04) |
| Tokushima        | 2011        | 1.0<br>(0.97–1.03)  |
| Tokushima        | 2012        | 1.01<br>(0.96–1.06) |
| Tokushima        | 2013        | 0.99<br>(0.93–1.04) |
| Tokushima        | 2014        | 0.99<br>(0.95–1.04) |
| Tokushima        | 2015        | 0.97<br>(0.93–1.02) |
| Tokushima        | 2016        | 0.97<br>(0.86–1.09) |
| Tokushima        | 2017        | 0.96<br>(0.81–1.13) |
| Tōkyō            | 1950        | 1.62<br>(1.33–1.94) |
| Tōkyō            | 1951        | 1.59<br>(1.31–1.9)  |

**Table 15 Ratio of adjusted to unadjusted 5q0 values for scaled locations by year**

| <b>Geography</b> | <b>Year</b> | <b>Ratio</b>        |
|------------------|-------------|---------------------|
| Tōkyō            | 1952        | 1.42<br>(1.17–1.68) |
| Tōkyō            | 1953        | 1.43<br>(1.19–1.68) |
| Tōkyō            | 1954        | 1.37<br>(1.15–1.62) |
| Tōkyō            | 1955        | 1.27<br>(1.07–1.49) |
| Tōkyō            | 1956        | 1.33<br>(1.12–1.56) |
| Tōkyō            | 1957        | 1.37<br>(1.16–1.6)  |
| Tōkyō            | 1958        | 1.3<br>(1.1–1.52)   |
| Tōkyō            | 1959        | 1.31<br>(1.11–1.53) |
| Tōkyō            | 1960        | 1.28<br>(1.07–1.5)  |
| Tōkyō            | 1961        | 1.27<br>(1.07–1.5)  |
| Tōkyō            | 1962        | 1.27<br>(1.05–1.51) |
| Tōkyō            | 1963        | 1.19<br>(0.97–1.41) |
| Tōkyō            | 1964        | 1.14<br>(0.93–1.36) |
| Tōkyō            | 1965        | 1.1<br>(0.89–1.32)  |
| Tōkyō            | 1966        | 1.05<br>(0.86–1.25) |
| Tōkyō            | 1967        | 1.15<br>(0.95–1.37) |
| Tōkyō            | 1968        | 1.07<br>(0.89–1.27) |
| Tōkyō            | 1969        | 1.12<br>(0.94–1.31) |
| Tōkyō            | 1970        | 1.13<br>(0.95–1.32) |
| Tōkyō            | 1971        | 1.11<br>(0.95–1.3)  |
| Tōkyō            | 1972        | 1.11<br>(0.95–1.29) |
| Tōkyō            | 1973        | 1.15<br>(1.0–1.32)  |
| Tōkyō            | 1974        | 1.11<br>(0.98–1.26) |
| Tōkyō            | 1975        | 1.07<br>(0.95–1.19) |
| Tōkyō            | 1976        | 1.05<br>(0.95–1.16) |
| Tōkyō            | 1977        | 1.04<br>(0.96–1.12) |
| Tōkyō            | 1978        | 1.03<br>(0.97–1.09) |
| Tōkyō            | 1979        | 1.01<br>(0.97–1.05) |
| Tōkyō            | 1980        | 1.0<br>(0.98–1.03)  |
| Tōkyō            | 1981        | 1.01<br>(0.99–1.04) |
| Tōkyō            | 1982        | 1.0<br>(0.97–1.02)  |

**Table 15 Ratio of adjusted to unadjusted 5q0 values for scaled locations by year**

| <b>Geography</b> | <b>Year</b> | <b>Ratio</b>        |
|------------------|-------------|---------------------|
| Tōkyō            | 1983        | 1.0<br>(0.97–1.02)  |
| Tōkyō            | 1984        | 1.01<br>(0.98–1.03) |
| Tōkyō            | 1985        | 0.98<br>(0.95–1.01) |
| Tōkyō            | 1986        | 0.99<br>(0.96–1.02) |
| Tōkyō            | 1987        | 0.98<br>(0.95–1.01) |
| Tōkyō            | 1988        | 0.98<br>(0.95–1.01) |
| Tōkyō            | 1989        | 0.97<br>(0.94–1.0)  |
| Tōkyō            | 1990        | 1.01<br>(0.97–1.03) |
| Tōkyō            | 1991        | 0.99<br>(0.96–1.02) |
| Tōkyō            | 1992        | 1.02<br>(0.99–1.05) |
| Tōkyō            | 1993        | 1.02<br>(0.99–1.06) |
| Tōkyō            | 1994        | 1.03<br>(0.99–1.06) |
| Tōkyō            | 1995        | 1.03<br>(0.99–1.06) |
| Tōkyō            | 1996        | 0.99<br>(0.96–1.02) |
| Tōkyō            | 1997        | 0.99<br>(0.96–1.03) |
| Tōkyō            | 1998        | 1.03<br>(1.0–1.07)  |
| Tōkyō            | 1999        | 0.99<br>(0.96–1.03) |
| Tōkyō            | 2000        | 0.99<br>(0.95–1.02) |
| Tōkyō            | 2001        | 0.97<br>(0.93–1.01) |
| Tōkyō            | 2002        | 0.98<br>(0.94–1.02) |
| Tōkyō            | 2003        | 0.98<br>(0.94–1.02) |
| Tōkyō            | 2004        | 0.98<br>(0.94–1.02) |
| Tōkyō            | 2005        | 0.99<br>(0.95–1.03) |
| Tōkyō            | 2006        | 0.99<br>(0.95–1.03) |
| Tōkyō            | 2007        | 0.99<br>(0.94–1.03) |
| Tōkyō            | 2008        | 1.0<br>(0.97–1.04)  |
| Tōkyō            | 2009        | 0.98<br>(0.93–1.02) |
| Tōkyō            | 2010        | 0.99<br>(0.95–1.04) |
| Tōkyō            | 2011        | 1.0<br>(0.97–1.03)  |
| Tōkyō            | 2012        | 1.01<br>(0.96–1.06) |
| Tōkyō            | 2013        | 0.99<br>(0.93–1.04) |

**Table 15 Ratio of adjusted to unadjusted 5q0 values for scaled locations by year**

| <b>Geography</b> | <b>Year</b> | <b>Ratio</b>        |
|------------------|-------------|---------------------|
| Tōkyō            | 2014        | 0.99<br>(0.95–1.04) |
| Tōkyō            | 2015        | 0.97<br>(0.93–1.02) |
| Tōkyō            | 2016        | 0.97<br>(0.86–1.09) |
| Tōkyō            | 2017        | 0.96<br>(0.81–1.13) |
| Tottori          | 1950        | 1.61<br>(1.33–1.93) |
| Tottori          | 1951        | 1.59<br>(1.31–1.89) |
| Tottori          | 1952        | 1.41<br>(1.17–1.67) |
| Tottori          | 1953        | 1.42<br>(1.18–1.67) |
| Tottori          | 1954        | 1.37<br>(1.15–1.61) |
| Tottori          | 1955        | 1.26<br>(1.07–1.48) |
| Tottori          | 1956        | 1.33<br>(1.12–1.55) |
| Tottori          | 1957        | 1.37<br>(1.16–1.59) |
| Tottori          | 1958        | 1.3<br>(1.1–1.51)   |
| Tottori          | 1959        | 1.31<br>(1.11–1.53) |
| Tottori          | 1960        | 1.28<br>(1.07–1.49) |
| Tottori          | 1961        | 1.27<br>(1.07–1.49) |
| Tottori          | 1962        | 1.27<br>(1.05–1.51) |
| Tottori          | 1963        | 1.19<br>(0.97–1.41) |
| Tottori          | 1964        | 1.14<br>(0.93–1.36) |
| Tottori          | 1965        | 1.1<br>(0.89–1.32)  |
| Tottori          | 1966        | 1.05<br>(0.86–1.25) |
| Tottori          | 1967        | 1.15<br>(0.95–1.37) |
| Tottori          | 1968        | 1.07<br>(0.89–1.27) |
| Tottori          | 1969        | 1.12<br>(0.94–1.31) |
| Tottori          | 1970        | 1.13<br>(0.95–1.32) |
| Tottori          | 1971        | 1.11<br>(0.95–1.29) |
| Tottori          | 1972        | 1.11<br>(0.96–1.29) |
| Tottori          | 1973        | 1.15<br>(1.0–1.32)  |
| Tottori          | 1974        | 1.11<br>(0.98–1.26) |
| Tottori          | 1975        | 1.07<br>(0.95–1.19) |
| Tottori          | 1976        | 1.05<br>(0.95–1.16) |

**Table 15 Ratio of adjusted to unadjusted 5q0 values for scaled locations by year**

| <b>Geography</b> | <b>Year</b> | <b>Ratio</b>        |
|------------------|-------------|---------------------|
| Tottori          | 1977        | 1.04<br>(0.96–1.12) |
| Tottori          | 1978        | 1.03<br>(0.97–1.09) |
| Tottori          | 1979        | 1.01<br>(0.97–1.05) |
| Tottori          | 1980        | 1.0<br>(0.98–1.03)  |
| Tottori          | 1981        | 1.01<br>(0.99–1.04) |
| Tottori          | 1982        | 1.0<br>(0.97–1.02)  |
| Tottori          | 1983        | 1.0<br>(0.97–1.02)  |
| Tottori          | 1984        | 1.01<br>(0.98–1.03) |
| Tottori          | 1985        | 0.98<br>(0.95–1.01) |
| Tottori          | 1986        | 0.99<br>(0.96–1.02) |
| Tottori          | 1987        | 0.98<br>(0.95–1.01) |
| Tottori          | 1988        | 0.98<br>(0.95–1.01) |
| Tottori          | 1989        | 0.97<br>(0.94–1.0)  |
| Tottori          | 1990        | 1.01<br>(0.97–1.03) |
| Tottori          | 1991        | 0.99<br>(0.96–1.02) |
| Tottori          | 1992        | 1.02<br>(0.99–1.05) |
| Tottori          | 1993        | 1.02<br>(0.99–1.06) |
| Tottori          | 1994        | 1.03<br>(0.99–1.06) |
| Tottori          | 1995        | 1.03<br>(0.99–1.06) |
| Tottori          | 1996        | 0.99<br>(0.96–1.02) |
| Tottori          | 1997        | 0.99<br>(0.96–1.03) |
| Tottori          | 1998        | 1.03<br>(1.0–1.07)  |
| Tottori          | 1999        | 0.99<br>(0.96–1.03) |
| Tottori          | 2000        | 0.99<br>(0.95–1.02) |
| Tottori          | 2001        | 0.97<br>(0.93–1.01) |
| Tottori          | 2002        | 0.98<br>(0.94–1.02) |
| Tottori          | 2003        | 0.98<br>(0.94–1.02) |
| Tottori          | 2004        | 0.98<br>(0.94–1.02) |
| Tottori          | 2005        | 0.99<br>(0.95–1.03) |
| Tottori          | 2006        | 0.99<br>(0.95–1.03) |
| Tottori          | 2007        | 0.99<br>(0.94–1.03) |



**Table 15 Ratio of adjusted to unadjusted 5q0 values for scaled locations by year**

| <b>Geography</b> | <b>Year</b> | <b>Ratio</b>        |
|------------------|-------------|---------------------|
| Tottori          | 2008        | 1.0<br>(0.97–1.04)  |
| Tottori          | 2009        | 0.98<br>(0.93–1.02) |
| Tottori          | 2010        | 0.99<br>(0.95–1.04) |
| Tottori          | 2011        | 1.0<br>(0.97–1.03)  |
| Tottori          | 2012        | 1.01<br>(0.96–1.06) |
| Tottori          | 2013        | 0.99<br>(0.93–1.04) |
| Tottori          | 2014        | 0.99<br>(0.95–1.04) |
| Tottori          | 2015        | 0.97<br>(0.93–1.02) |
| Tottori          | 2016        | 0.97<br>(0.86–1.09) |
| Tottori          | 2017        | 0.96<br>(0.81–1.13) |
| Toyama           | 1950        | 1.61<br>(1.33–1.93) |
| Toyama           | 1951        | 1.59<br>(1.31–1.89) |
| Toyama           | 1952        | 1.41<br>(1.17–1.67) |
| Toyama           | 1953        | 1.42<br>(1.18–1.67) |
| Toyama           | 1954        | 1.37<br>(1.15–1.61) |
| Toyama           | 1955        | 1.26<br>(1.07–1.48) |
| Toyama           | 1956        | 1.33<br>(1.12–1.55) |
| Toyama           | 1957        | 1.37<br>(1.16–1.59) |
| Toyama           | 1958        | 1.3<br>(1.1–1.51)   |
| Toyama           | 1959        | 1.31<br>(1.11–1.53) |
| Toyama           | 1960        | 1.28<br>(1.07–1.49) |
| Toyama           | 1961        | 1.27<br>(1.07–1.49) |
| Toyama           | 1962        | 1.27<br>(1.05–1.51) |
| Toyama           | 1963        | 1.19<br>(0.97–1.41) |
| Toyama           | 1964        | 1.14<br>(0.93–1.36) |
| Toyama           | 1965        | 1.1<br>(0.89–1.32)  |
| Toyama           | 1966        | 1.05<br>(0.86–1.25) |
| Toyama           | 1967        | 1.15<br>(0.95–1.37) |
| Toyama           | 1968        | 1.07<br>(0.89–1.27) |
| Toyama           | 1969        | 1.12<br>(0.94–1.31) |
| Toyama           | 1970        | 1.13<br>(0.95–1.32) |

**Table 15 Ratio of adjusted to unadjusted 5q0 values for scaled locations by year**

| <b>Geography</b> | <b>Year</b> | <b>Ratio</b>        |
|------------------|-------------|---------------------|
| Toyama           | 1971        | 1.11<br>(0.95–1.3)  |
| Toyama           | 1972        | 1.11<br>(0.96–1.29) |
| Toyama           | 1973        | 1.15<br>(1.0–1.32)  |
| Toyama           | 1974        | 1.11<br>(0.98–1.26) |
| Toyama           | 1975        | 1.07<br>(0.95–1.19) |
| Toyama           | 1976        | 1.05<br>(0.95–1.16) |
| Toyama           | 1977        | 1.04<br>(0.96–1.12) |
| Toyama           | 1978        | 1.03<br>(0.97–1.09) |
| Toyama           | 1979        | 1.01<br>(0.97–1.05) |
| Toyama           | 1980        | 1.0<br>(0.98–1.03)  |
| Toyama           | 1981        | 1.01<br>(0.99–1.04) |
| Toyama           | 1982        | 1.0<br>(0.97–1.02)  |
| Toyama           | 1983        | 1.0<br>(0.97–1.02)  |
| Toyama           | 1984        | 1.01<br>(0.98–1.03) |
| Toyama           | 1985        | 0.98<br>(0.95–1.01) |
| Toyama           | 1986        | 0.99<br>(0.96–1.02) |
| Toyama           | 1987        | 0.98<br>(0.95–1.01) |
| Toyama           | 1988        | 0.98<br>(0.95–1.01) |
| Toyama           | 1989        | 0.97<br>(0.94–1.0)  |
| Toyama           | 1990        | 1.01<br>(0.97–1.03) |
| Toyama           | 1991        | 0.99<br>(0.96–1.02) |
| Toyama           | 1992        | 1.02<br>(0.99–1.05) |
| Toyama           | 1993        | 1.02<br>(0.99–1.06) |
| Toyama           | 1994        | 1.03<br>(0.99–1.06) |
| Toyama           | 1995        | 1.03<br>(0.99–1.06) |
| Toyama           | 1996        | 0.99<br>(0.96–1.02) |
| Toyama           | 1997        | 0.99<br>(0.96–1.03) |
| Toyama           | 1998        | 1.03<br>(1.0–1.07)  |
| Toyama           | 1999        | 0.99<br>(0.96–1.03) |
| Toyama           | 2000        | 0.99<br>(0.95–1.02) |
| Toyama           | 2001        | 0.97<br>(0.93–1.01) |

**Table 15 Ratio of adjusted to unadjusted 5q0 values for scaled locations by year**

| <b>Geography</b> | <b>Year</b> | <b>Ratio</b>        |
|------------------|-------------|---------------------|
| Toyama           | 2002        | 0.98<br>(0.94–1.02) |
| Toyama           | 2003        | 0.98<br>(0.94–1.02) |
| Toyama           | 2004        | 0.98<br>(0.94–1.02) |
| Toyama           | 2005        | 0.99<br>(0.95–1.03) |
| Toyama           | 2006        | 0.99<br>(0.95–1.03) |
| Toyama           | 2007        | 0.99<br>(0.94–1.03) |
| Toyama           | 2008        | 1.0<br>(0.97–1.04)  |
| Toyama           | 2009        | 0.98<br>(0.93–1.02) |
| Toyama           | 2010        | 0.99<br>(0.95–1.04) |
| Toyama           | 2011        | 1.0<br>(0.97–1.03)  |
| Toyama           | 2012        | 1.01<br>(0.96–1.06) |
| Toyama           | 2013        | 0.99<br>(0.93–1.04) |
| Toyama           | 2014        | 0.99<br>(0.95–1.04) |
| Toyama           | 2015        | 0.97<br>(0.93–1.02) |
| Toyama           | 2016        | 0.97<br>(0.86–1.09) |
| Toyama           | 2017        | 0.96<br>(0.81–1.13) |
| Wakayama         | 1950        | 1.61<br>(1.33–1.92) |
| Wakayama         | 1951        | 1.58<br>(1.3–1.89)  |
| Wakayama         | 1952        | 1.41<br>(1.17–1.67) |
| Wakayama         | 1953        | 1.42<br>(1.18–1.67) |
| Wakayama         | 1954        | 1.37<br>(1.15–1.61) |
| Wakayama         | 1955        | 1.26<br>(1.07–1.48) |
| Wakayama         | 1956        | 1.33<br>(1.12–1.55) |
| Wakayama         | 1957        | 1.37<br>(1.16–1.59) |
| Wakayama         | 1958        | 1.3<br>(1.1–1.51)   |
| Wakayama         | 1959        | 1.31<br>(1.11–1.53) |
| Wakayama         | 1960        | 1.28<br>(1.07–1.49) |
| Wakayama         | 1961        | 1.27<br>(1.07–1.49) |
| Wakayama         | 1962        | 1.27<br>(1.05–1.51) |
| Wakayama         | 1963        | 1.19<br>(0.97–1.41) |
| Wakayama         | 1964        | 1.14<br>(0.93–1.36) |

**Table 15 Ratio of adjusted to unadjusted 5q0 values for scaled locations by year**

| <b>Geography</b> | <b>Year</b> | <b>Ratio</b>        |
|------------------|-------------|---------------------|
| Wakayama         | 1965        | 1.1<br>(0.89–1.32)  |
| Wakayama         | 1966        | 1.05<br>(0.86–1.25) |
| Wakayama         | 1967        | 1.15<br>(0.95–1.37) |
| Wakayama         | 1968        | 1.07<br>(0.89–1.27) |
| Wakayama         | 1969        | 1.12<br>(0.94–1.31) |
| Wakayama         | 1970        | 1.13<br>(0.95–1.32) |
| Wakayama         | 1971        | 1.11<br>(0.95–1.29) |
| Wakayama         | 1972        | 1.11<br>(0.96–1.29) |
| Wakayama         | 1973        | 1.15<br>(1.0–1.32)  |
| Wakayama         | 1974        | 1.11<br>(0.98–1.26) |
| Wakayama         | 1975        | 1.07<br>(0.95–1.19) |
| Wakayama         | 1976        | 1.05<br>(0.95–1.16) |
| Wakayama         | 1977        | 1.04<br>(0.96–1.12) |
| Wakayama         | 1978        | 1.03<br>(0.97–1.09) |
| Wakayama         | 1979        | 1.01<br>(0.97–1.05) |
| Wakayama         | 1980        | 1.0<br>(0.98–1.03)  |
| Wakayama         | 1981        | 1.01<br>(0.99–1.04) |
| Wakayama         | 1982        | 1.0<br>(0.97–1.02)  |
| Wakayama         | 1983        | 1.0<br>(0.97–1.02)  |
| Wakayama         | 1984        | 1.01<br>(0.98–1.03) |
| Wakayama         | 1985        | 0.98<br>(0.95–1.01) |
| Wakayama         | 1986        | 0.99<br>(0.96–1.02) |
| Wakayama         | 1987        | 0.98<br>(0.95–1.01) |
| Wakayama         | 1988        | 0.98<br>(0.95–1.01) |
| Wakayama         | 1989        | 0.97<br>(0.94–1.0)  |
| Wakayama         | 1990        | 1.01<br>(0.97–1.03) |
| Wakayama         | 1991        | 0.99<br>(0.96–1.02) |
| Wakayama         | 1992        | 1.02<br>(0.99–1.05) |
| Wakayama         | 1993        | 1.02<br>(0.99–1.06) |
| Wakayama         | 1994        | 1.03<br>(0.99–1.06) |
| Wakayama         | 1995        | 1.03<br>(0.99–1.06) |

**Table 15 Ratio of adjusted to unadjusted 5q0 values for scaled locations by year**

| <b>Geography</b> | <b>Year</b> | <b>Ratio</b>        |
|------------------|-------------|---------------------|
| Wakayama         | 1996        | 0.99<br>(0.96–1.02) |
| Wakayama         | 1997        | 0.99<br>(0.96–1.03) |
| Wakayama         | 1998        | 1.03<br>(1.0–1.07)  |
| Wakayama         | 1999        | 0.99<br>(0.96–1.03) |
| Wakayama         | 2000        | 0.99<br>(0.95–1.02) |
| Wakayama         | 2001        | 0.97<br>(0.93–1.01) |
| Wakayama         | 2002        | 0.98<br>(0.94–1.02) |
| Wakayama         | 2003        | 0.98<br>(0.94–1.02) |
| Wakayama         | 2004        | 0.98<br>(0.94–1.02) |
| Wakayama         | 2005        | 0.99<br>(0.95–1.03) |
| Wakayama         | 2006        | 0.99<br>(0.95–1.03) |
| Wakayama         | 2007        | 0.99<br>(0.94–1.03) |
| Wakayama         | 2008        | 1.0<br>(0.97–1.04)  |
| Wakayama         | 2009        | 0.98<br>(0.93–1.02) |
| Wakayama         | 2010        | 0.99<br>(0.95–1.04) |
| Wakayama         | 2011        | 1.0<br>(0.97–1.03)  |
| Wakayama         | 2012        | 1.01<br>(0.96–1.06) |
| Wakayama         | 2013        | 0.99<br>(0.93–1.04) |
| Wakayama         | 2014        | 0.99<br>(0.95–1.04) |
| Wakayama         | 2015        | 0.97<br>(0.93–1.02) |
| Wakayama         | 2016        | 0.97<br>(0.86–1.09) |
| Wakayama         | 2017        | 0.96<br>(0.81–1.13) |
| Yamagata         | 1950        | 1.61<br>(1.33–1.93) |
| Yamagata         | 1951        | 1.59<br>(1.31–1.89) |
| Yamagata         | 1952        | 1.41<br>(1.17–1.67) |
| Yamagata         | 1953        | 1.42<br>(1.18–1.67) |
| Yamagata         | 1954        | 1.37<br>(1.15–1.61) |
| Yamagata         | 1955        | 1.26<br>(1.07–1.48) |
| Yamagata         | 1956        | 1.33<br>(1.12–1.55) |
| Yamagata         | 1957        | 1.37<br>(1.16–1.59) |
| Yamagata         | 1958        | 1.3<br>(1.1–1.51)   |

**Table 15 Ratio of adjusted to unadjusted 5q0 values for scaled locations by year**

| <b>Geography</b> | <b>Year</b> | <b>Ratio</b>        |
|------------------|-------------|---------------------|
| Yamagata         | 1959        | 1.31<br>(1.11–1.53) |
| Yamagata         | 1960        | 1.28<br>(1.07–1.49) |
| Yamagata         | 1961        | 1.27<br>(1.07–1.49) |
| Yamagata         | 1962        | 1.27<br>(1.05–1.51) |
| Yamagata         | 1963        | 1.19<br>(0.97–1.41) |
| Yamagata         | 1964        | 1.14<br>(0.93–1.36) |
| Yamagata         | 1965        | 1.1<br>(0.89–1.32)  |
| Yamagata         | 1966        | 1.05<br>(0.86–1.25) |
| Yamagata         | 1967        | 1.15<br>(0.95–1.37) |
| Yamagata         | 1968        | 1.07<br>(0.89–1.27) |
| Yamagata         | 1969        | 1.12<br>(0.94–1.31) |
| Yamagata         | 1970        | 1.13<br>(0.95–1.32) |
| Yamagata         | 1971        | 1.11<br>(0.95–1.3)  |
| Yamagata         | 1972        | 1.11<br>(0.96–1.29) |
| Yamagata         | 1973        | 1.15<br>(1.0–1.32)  |
| Yamagata         | 1974        | 1.11<br>(0.98–1.26) |
| Yamagata         | 1975        | 1.07<br>(0.95–1.19) |
| Yamagata         | 1976        | 1.05<br>(0.95–1.16) |
| Yamagata         | 1977        | 1.04<br>(0.96–1.12) |
| Yamagata         | 1978        | 1.03<br>(0.97–1.09) |
| Yamagata         | 1979        | 1.01<br>(0.97–1.05) |
| Yamagata         | 1980        | 1.0<br>(0.98–1.03)  |
| Yamagata         | 1981        | 1.01<br>(0.99–1.04) |
| Yamagata         | 1982        | 1.0<br>(0.97–1.02)  |
| Yamagata         | 1983        | 1.0<br>(0.97–1.02)  |
| Yamagata         | 1984        | 1.01<br>(0.98–1.03) |
| Yamagata         | 1985        | 0.98<br>(0.95–1.01) |
| Yamagata         | 1986        | 0.99<br>(0.96–1.02) |
| Yamagata         | 1987        | 0.98<br>(0.95–1.01) |
| Yamagata         | 1988        | 0.98<br>(0.95–1.01) |
| Yamagata         | 1989        | 0.97<br>(0.94–1.0)  |

**Table 15 Ratio of adjusted to unadjusted 5q0 values for scaled locations by year**

| <b>Geography</b> | <b>Year</b> | <b>Ratio</b>        |
|------------------|-------------|---------------------|
| Yamagata         | 1990        | 1.01<br>(0.97–1.04) |
| Yamagata         | 1991        | 0.99<br>(0.96–1.02) |
| Yamagata         | 1992        | 1.02<br>(0.99–1.05) |
| Yamagata         | 1993        | 1.02<br>(0.99–1.06) |
| Yamagata         | 1994        | 1.03<br>(0.99–1.06) |
| Yamagata         | 1995        | 1.03<br>(0.99–1.06) |
| Yamagata         | 1996        | 0.99<br>(0.96–1.02) |
| Yamagata         | 1997        | 0.99<br>(0.96–1.03) |
| Yamagata         | 1998        | 1.03<br>(1.0–1.07)  |
| Yamagata         | 1999        | 0.99<br>(0.96–1.03) |
| Yamagata         | 2000        | 0.99<br>(0.95–1.02) |
| Yamagata         | 2001        | 0.97<br>(0.93–1.01) |
| Yamagata         | 2002        | 0.98<br>(0.94–1.02) |
| Yamagata         | 2003        | 0.98<br>(0.94–1.02) |
| Yamagata         | 2004        | 0.98<br>(0.94–1.02) |
| Yamagata         | 2005        | 0.99<br>(0.95–1.03) |
| Yamagata         | 2006        | 0.99<br>(0.95–1.03) |
| Yamagata         | 2007        | 0.99<br>(0.94–1.03) |
| Yamagata         | 2008        | 1.0<br>(0.97–1.04)  |
| Yamagata         | 2009        | 0.98<br>(0.93–1.02) |
| Yamagata         | 2010        | 0.99<br>(0.95–1.04) |
| Yamagata         | 2011        | 1.0<br>(0.97–1.03)  |
| Yamagata         | 2012        | 1.01<br>(0.96–1.06) |
| Yamagata         | 2013        | 0.99<br>(0.93–1.04) |
| Yamagata         | 2014        | 0.99<br>(0.95–1.04) |
| Yamagata         | 2015        | 0.97<br>(0.93–1.02) |
| Yamagata         | 2016        | 0.97<br>(0.86–1.09) |
| Yamagata         | 2017        | 0.96<br>(0.81–1.13) |
| Yamaguchi        | 1950        | 1.61<br>(1.33–1.93) |
| Yamaguchi        | 1951        | 1.59<br>(1.31–1.89) |
| Yamaguchi        | 1952        | 1.41<br>(1.17–1.67) |

**Table 15 Ratio of adjusted to unadjusted 5q0 values for scaled locations by year**

| <b>Geography</b> | <b>Year</b> | <b>Ratio</b>        |
|------------------|-------------|---------------------|
| Yamaguchi        | 1953        | 1.42<br>(1.18–1.67) |
| Yamaguchi        | 1954        | 1.37<br>(1.15–1.61) |
| Yamaguchi        | 1955        | 1.26<br>(1.07–1.48) |
| Yamaguchi        | 1956        | 1.33<br>(1.12–1.55) |
| Yamaguchi        | 1957        | 1.37<br>(1.16–1.59) |
| Yamaguchi        | 1958        | 1.3<br>(1.1–1.51)   |
| Yamaguchi        | 1959        | 1.31<br>(1.11–1.53) |
| Yamaguchi        | 1960        | 1.28<br>(1.07–1.49) |
| Yamaguchi        | 1961        | 1.27<br>(1.07–1.49) |
| Yamaguchi        | 1962        | 1.27<br>(1.05–1.51) |
| Yamaguchi        | 1963        | 1.19<br>(0.97–1.41) |
| Yamaguchi        | 1964        | 1.14<br>(0.93–1.36) |
| Yamaguchi        | 1965        | 1.1<br>(0.89–1.32)  |
| Yamaguchi        | 1966        | 1.05<br>(0.86–1.25) |
| Yamaguchi        | 1967        | 1.15<br>(0.95–1.37) |
| Yamaguchi        | 1968        | 1.07<br>(0.89–1.27) |
| Yamaguchi        | 1969        | 1.12<br>(0.94–1.31) |
| Yamaguchi        | 1970        | 1.13<br>(0.95–1.32) |
| Yamaguchi        | 1971        | 1.11<br>(0.95–1.3)  |
| Yamaguchi        | 1972        | 1.11<br>(0.96–1.29) |
| Yamaguchi        | 1973        | 1.15<br>(1.0–1.32)  |
| Yamaguchi        | 1974        | 1.11<br>(0.98–1.26) |
| Yamaguchi        | 1975        | 1.07<br>(0.95–1.19) |
| Yamaguchi        | 1976        | 1.05<br>(0.95–1.16) |
| Yamaguchi        | 1977        | 1.04<br>(0.96–1.12) |
| Yamaguchi        | 1978        | 1.03<br>(0.97–1.09) |
| Yamaguchi        | 1979        | 1.01<br>(0.97–1.05) |
| Yamaguchi        | 1980        | 1.0<br>(0.98–1.03)  |
| Yamaguchi        | 1981        | 1.01<br>(0.99–1.04) |
| Yamaguchi        | 1982        | 1.0<br>(0.97–1.02)  |
| Yamaguchi        | 1983        | 1.0<br>(0.97–1.02)  |



**Table 15 Ratio of adjusted to unadjusted 5q0 values for scaled locations by year**

| <b>Geography</b> | <b>Year</b> | <b>Ratio</b>        |
|------------------|-------------|---------------------|
| Yamaguchi        | 1984        | 1.01<br>(0.98–1.03) |
| Yamaguchi        | 1985        | 0.98<br>(0.95–1.01) |
| Yamaguchi        | 1986        | 0.99<br>(0.96–1.02) |
| Yamaguchi        | 1987        | 0.98<br>(0.95–1.01) |
| Yamaguchi        | 1988        | 0.98<br>(0.95–1.01) |
| Yamaguchi        | 1989        | 0.97<br>(0.94–1.0)  |
| Yamaguchi        | 1990        | 1.01<br>(0.97–1.03) |
| Yamaguchi        | 1991        | 0.99<br>(0.96–1.02) |
| Yamaguchi        | 1992        | 1.02<br>(0.99–1.05) |
| Yamaguchi        | 1993        | 1.02<br>(0.99–1.06) |
| Yamaguchi        | 1994        | 1.03<br>(0.99–1.06) |
| Yamaguchi        | 1995        | 1.03<br>(0.99–1.06) |
| Yamaguchi        | 1996        | 0.99<br>(0.96–1.02) |
| Yamaguchi        | 1997        | 0.99<br>(0.96–1.03) |
| Yamaguchi        | 1998        | 1.03<br>(1.0–1.07)  |
| Yamaguchi        | 1999        | 0.99<br>(0.96–1.03) |
| Yamaguchi        | 2000        | 0.99<br>(0.95–1.02) |
| Yamaguchi        | 2001        | 0.97<br>(0.93–1.01) |
| Yamaguchi        | 2002        | 0.98<br>(0.94–1.02) |
| Yamaguchi        | 2003        | 0.98<br>(0.94–1.02) |
| Yamaguchi        | 2004        | 0.98<br>(0.94–1.02) |
| Yamaguchi        | 2005        | 0.99<br>(0.95–1.03) |
| Yamaguchi        | 2006        | 0.99<br>(0.95–1.03) |
| Yamaguchi        | 2007        | 0.99<br>(0.94–1.03) |
| Yamaguchi        | 2008        | 1.0<br>(0.97–1.04)  |
| Yamaguchi        | 2009        | 0.98<br>(0.93–1.02) |
| Yamaguchi        | 2010        | 0.99<br>(0.95–1.04) |
| Yamaguchi        | 2011        | 1.0<br>(0.97–1.03)  |
| Yamaguchi        | 2012        | 1.01<br>(0.96–1.06) |
| Yamaguchi        | 2013        | 0.99<br>(0.93–1.04) |
| Yamaguchi        | 2014        | 0.99<br>(0.95–1.04) |

**Table 15 Ratio of adjusted to unadjusted 5q0 values for scaled locations by year**

| <b>Geography</b> | <b>Year</b> | <b>Ratio</b>        |
|------------------|-------------|---------------------|
| Yamaguchi        | 2015        | 0.97<br>(0.93–1.02) |
| Yamaguchi        | 2016        | 0.97<br>(0.86–1.09) |
| Yamaguchi        | 2017        | 0.96<br>(0.81–1.13) |
| Yamanashi        | 1950        | 1.61<br>(1.33–1.93) |
| Yamanashi        | 1951        | 1.59<br>(1.31–1.9)  |
| Yamanashi        | 1952        | 1.41<br>(1.17–1.67) |
| Yamanashi        | 1953        | 1.42<br>(1.18–1.68) |
| Yamanashi        | 1954        | 1.37<br>(1.15–1.61) |
| Yamanashi        | 1955        | 1.26<br>(1.07–1.48) |
| Yamanashi        | 1956        | 1.33<br>(1.12–1.56) |
| Yamanashi        | 1957        | 1.37<br>(1.16–1.6)  |
| Yamanashi        | 1958        | 1.3<br>(1.1–1.52)   |
| Yamanashi        | 1959        | 1.31<br>(1.11–1.53) |
| Yamanashi        | 1960        | 1.28<br>(1.07–1.49) |
| Yamanashi        | 1961        | 1.27<br>(1.07–1.5)  |
| Yamanashi        | 1962        | 1.27<br>(1.05–1.51) |
| Yamanashi        | 1963        | 1.19<br>(0.97–1.41) |
| Yamanashi        | 1964        | 1.14<br>(0.93–1.36) |
| Yamanashi        | 1965        | 1.1<br>(0.89–1.32)  |
| Yamanashi        | 1966        | 1.05<br>(0.86–1.25) |
| Yamanashi        | 1967        | 1.15<br>(0.95–1.37) |
| Yamanashi        | 1968        | 1.07<br>(0.89–1.27) |
| Yamanashi        | 1969        | 1.12<br>(0.94–1.31) |
| Yamanashi        | 1970        | 1.13<br>(0.95–1.32) |
| Yamanashi        | 1971        | 1.11<br>(0.95–1.3)  |
| Yamanashi        | 1972        | 1.11<br>(0.95–1.29) |
| Yamanashi        | 1973        | 1.15<br>(1.0–1.32)  |
| Yamanashi        | 1974        | 1.11<br>(0.98–1.26) |
| Yamanashi        | 1975        | 1.07<br>(0.95–1.19) |
| Yamanashi        | 1976        | 1.05<br>(0.95–1.16) |
| Yamanashi        | 1977        | 1.04<br>(0.96–1.12) |

**Table 15 Ratio of adjusted to unadjusted 5q0 values for scaled locations by year**

| <b>Geography</b> | <b>Year</b> | <b>Ratio</b>        |
|------------------|-------------|---------------------|
| Yamanashi        | 1978        | 1.03<br>(0.97-1.09) |
| Yamanashi        | 1979        | 1.01<br>(0.97-1.05) |
| Yamanashi        | 1980        | 1.0<br>(0.98-1.03)  |
| Yamanashi        | 1981        | 1.01<br>(0.99-1.04) |
| Yamanashi        | 1982        | 1.0<br>(0.97-1.02)  |
| Yamanashi        | 1983        | 1.0<br>(0.97-1.02)  |
| Yamanashi        | 1984        | 1.01<br>(0.98-1.03) |
| Yamanashi        | 1985        | 0.98<br>(0.95-1.01) |
| Yamanashi        | 1986        | 0.99<br>(0.96-1.02) |
| Yamanashi        | 1987        | 0.98<br>(0.95-1.01) |
| Yamanashi        | 1988        | 0.98<br>(0.95-1.01) |
| Yamanashi        | 1989        | 0.97<br>(0.94-1.0)  |
| Yamanashi        | 1990        | 1.01<br>(0.97-1.03) |
| Yamanashi        | 1991        | 0.99<br>(0.96-1.02) |
| Yamanashi        | 1992        | 1.02<br>(0.99-1.05) |
| Yamanashi        | 1993        | 1.02<br>(0.99-1.06) |
| Yamanashi        | 1994        | 1.03<br>(0.99-1.06) |
| Yamanashi        | 1995        | 1.03<br>(0.99-1.06) |
| Yamanashi        | 1996        | 0.99<br>(0.96-1.02) |
| Yamanashi        | 1997        | 0.99<br>(0.96-1.03) |
| Yamanashi        | 1998        | 1.03<br>(1.0-1.07)  |
| Yamanashi        | 1999        | 0.99<br>(0.96-1.03) |
| Yamanashi        | 2000        | 0.99<br>(0.95-1.02) |
| Yamanashi        | 2001        | 0.97<br>(0.93-1.01) |
| Yamanashi        | 2002        | 0.98<br>(0.94-1.02) |
| Yamanashi        | 2003        | 0.98<br>(0.94-1.02) |
| Yamanashi        | 2004        | 0.98<br>(0.94-1.02) |
| Yamanashi        | 2005        | 0.99<br>(0.95-1.03) |
| Yamanashi        | 2006        | 0.99<br>(0.95-1.03) |
| Yamanashi        | 2007        | 0.99<br>(0.94-1.03) |
| Yamanashi        | 2008        | 1.0<br>(0.97-1.04)  |

**Table 15 Ratio of adjusted to unadjusted 5q0 values for scaled locations by year**

| <b>Geography</b> | <b>Year</b> | <b>Ratio</b>        |
|------------------|-------------|---------------------|
| Yamanashi        | 2009        | 0.98<br>(0.93–1.02) |
| Yamanashi        | 2010        | 0.99<br>(0.95–1.04) |
| Yamanashi        | 2011        | 1.0<br>(0.97–1.03)  |
| Yamanashi        | 2012        | 1.01<br>(0.96–1.06) |
| Yamanashi        | 2013        | 0.99<br>(0.93–1.04) |
| Yamanashi        | 2014        | 0.99<br>(0.95–1.04) |
| Yamanashi        | 2015        | 0.97<br>(0.93–1.02) |
| Yamanashi        | 2016        | 0.97<br>(0.86–1.09) |
| Yamanashi        | 2017        | 0.96<br>(0.81–1.13) |
| United States    | 1950        | 1.0<br>(1.0–1.0)    |
| United States    | 1951        | 1.0<br>(1.0–1.0)    |
| United States    | 1952        | 1.0<br>(1.0–1.0)    |
| United States    | 1953        | 1.0<br>(1.0–1.0)    |
| United States    | 1954        | 1.0<br>(1.0–1.0)    |
| United States    | 1955        | 1.0<br>(1.0–1.0)    |
| United States    | 1956        | 1.0<br>(1.0–1.0)    |
| United States    | 1957        | 1.0<br>(1.0–1.0)    |
| United States    | 1958        | 1.0<br>(1.0–1.0)    |
| United States    | 1959        | 1.0<br>(1.0–1.0)    |
| United States    | 1960        | 1.0<br>(1.0–1.0)    |
| United States    | 1961        | 1.0<br>(1.0–1.0)    |
| United States    | 1962        | 1.0<br>(1.0–1.0)    |
| United States    | 1963        | 1.0<br>(1.0–1.0)    |
| United States    | 1964        | 1.0<br>(1.0–1.0)    |
| United States    | 1965        | 1.0<br>(1.0–1.0)    |
| United States    | 1966        | 1.0<br>(1.0–1.0)    |
| United States    | 1967        | 1.0<br>(1.0–1.0)    |
| United States    | 1968        | 1.0<br>(1.0–1.0)    |
| United States    | 1969        | 1.0<br>(1.0–1.0)    |
| United States    | 1970        | 1.0<br>(1.0–1.0)    |
| United States    | 1971        | 1.0<br>(1.0–1.0)    |

**Table 15 Ratio of adjusted to unadjusted 5q0 values for scaled locations by year**

| <b>Geography</b> | <b>Year</b> | <b>Ratio</b>     |
|------------------|-------------|------------------|
| United States    | 1972        | 1.0<br>(1.0-1.0) |
| United States    | 1973        | 1.0<br>(1.0-1.0) |
| United States    | 1974        | 1.0<br>(1.0-1.0) |
| United States    | 1975        | 1.0<br>(1.0-1.0) |
| United States    | 1976        | 1.0<br>(1.0-1.0) |
| United States    | 1977        | 1.0<br>(1.0-1.0) |
| United States    | 1978        | 1.0<br>(1.0-1.0) |
| United States    | 1979        | 1.0<br>(1.0-1.0) |
| United States    | 1980        | 1.0<br>(1.0-1.0) |
| United States    | 1981        | 1.0<br>(1.0-1.0) |
| United States    | 1982        | 1.0<br>(1.0-1.0) |
| United States    | 1983        | 1.0<br>(1.0-1.0) |
| United States    | 1984        | 1.0<br>(1.0-1.0) |
| United States    | 1985        | 1.0<br>(1.0-1.0) |
| United States    | 1986        | 1.0<br>(1.0-1.0) |
| United States    | 1987        | 1.0<br>(1.0-1.0) |
| United States    | 1988        | 1.0<br>(1.0-1.0) |
| United States    | 1989        | 1.0<br>(1.0-1.0) |
| United States    | 1990        | 1.0<br>(1.0-1.0) |
| United States    | 1991        | 1.0<br>(1.0-1.0) |
| United States    | 1992        | 1.0<br>(1.0-1.0) |
| United States    | 1993        | 1.0<br>(1.0-1.0) |
| United States    | 1994        | 1.0<br>(1.0-1.0) |
| United States    | 1995        | 1.0<br>(1.0-1.0) |
| United States    | 1996        | 1.0<br>(1.0-1.0) |
| United States    | 1997        | 1.0<br>(1.0-1.0) |
| United States    | 1998        | 1.0<br>(1.0-1.0) |
| United States    | 1999        | 1.0<br>(1.0-1.0) |
| United States    | 2000        | 1.0<br>(1.0-1.0) |
| United States    | 2001        | 1.0<br>(1.0-1.0) |
| United States    | 2002        | 1.0<br>(1.0-1.0) |

**Table 15 Ratio of adjusted to unadjusted 5q0 values for scaled locations by year**

| <b>Geography</b> | <b>Year</b> | <b>Ratio</b>        |
|------------------|-------------|---------------------|
| United States    | 2003        | 1.0<br>(1.0–1.0)    |
| United States    | 2004        | 1.0<br>(1.0–1.0)    |
| United States    | 2005        | 1.0<br>(1.0–1.0)    |
| United States    | 2006        | 1.0<br>(1.0–1.0)    |
| United States    | 2007        | 1.0<br>(1.0–1.0)    |
| United States    | 2008        | 1.0<br>(1.0–1.0)    |
| United States    | 2009        | 1.0<br>(1.0–1.0)    |
| United States    | 2010        | 1.0<br>(1.0–1.0)    |
| United States    | 2011        | 1.0<br>(1.0–1.0)    |
| United States    | 2012        | 1.0<br>(1.0–1.0)    |
| United States    | 2013        | 1.0<br>(1.0–1.0)    |
| United States    | 2014        | 1.0<br>(1.0–1.0)    |
| United States    | 2015        | 1.0<br>(1.0–1.0)    |
| United States    | 2016        | 1.0<br>(1.0–1.0)    |
| United States    | 2017        | 1.0<br>(1.0–1.0)    |
| Alabama          | 1950        | 0.81<br>(0.67–0.97) |
| Alabama          | 1951        | 0.86<br>(0.71–1.01) |
| Alabama          | 1952        | 0.87<br>(0.74–1.02) |
| Alabama          | 1953        | 0.87<br>(0.73–1.02) |
| Alabama          | 1954        | 0.86<br>(0.72–1.0)  |
| Alabama          | 1955        | 0.87<br>(0.73–1.01) |
| Alabama          | 1956        | 0.89<br>(0.77–1.02) |
| Alabama          | 1957        | 0.93<br>(0.83–1.03) |
| Alabama          | 1958        | 0.96<br>(0.91–1.02) |
| Alabama          | 1959        | 1.0<br>(0.99–1.01)  |
| Alabama          | 1960        | 1.0<br>(0.99–1.01)  |
| Alabama          | 1961        | 1.0<br>(0.99–1.01)  |
| Alabama          | 1962        | 1.0<br>(0.99–1.01)  |
| Alabama          | 1963        | 1.01<br>(0.99–1.02) |
| Alabama          | 1964        | 1.0<br>(0.99–1.01)  |
| Alabama          | 1965        | 1.0<br>(0.98–1.02)  |

**Table 15 Ratio of adjusted to unadjusted 5q0 values for scaled locations by year**

| <b>Geography</b> | <b>Year</b> | <b>Ratio</b>        |
|------------------|-------------|---------------------|
| Alabama          | 1966        | 1.0<br>(0.98–1.02)  |
| Alabama          | 1967        | 1.0<br>(0.98–1.01)  |
| Alabama          | 1968        | 1.0<br>(0.98–1.01)  |
| Alabama          | 1969        | 1.0<br>(0.99–1.02)  |
| Alabama          | 1970        | 1.01<br>(0.99–1.02) |
| Alabama          | 1971        | 1.0<br>(0.98–1.01)  |
| Alabama          | 1972        | 1.0<br>(0.99–1.01)  |
| Alabama          | 1973        | 1.0<br>(0.99–1.02)  |
| Alabama          | 1974        | 1.0<br>(0.99–1.02)  |
| Alabama          | 1975        | 1.0<br>(0.98–1.01)  |
| Alabama          | 1976        | 1.0<br>(0.99–1.02)  |
| Alabama          | 1977        | 1.0<br>(0.98–1.01)  |
| Alabama          | 1978        | 1.0<br>(0.99–1.01)  |
| Alabama          | 1979        | 1.0<br>(0.99–1.01)  |
| Alabama          | 1980        | 1.0<br>(0.99–1.01)  |
| Alabama          | 1981        | 1.0<br>(0.98–1.01)  |
| Alabama          | 1982        | 1.0<br>(0.99–1.01)  |
| Alabama          | 1983        | 1.0<br>(0.98–1.01)  |
| Alabama          | 1984        | 1.0<br>(0.98–1.01)  |
| Alabama          | 1985        | 1.0<br>(0.99–1.02)  |
| Alabama          | 1986        | 1.0<br>(0.99–1.01)  |
| Alabama          | 1987        | 1.0<br>(0.99–1.01)  |
| Alabama          | 1988        | 1.0<br>(0.99–1.02)  |
| Alabama          | 1989        | 1.01<br>(0.99–1.02) |
| Alabama          | 1990        | 1.0<br>(0.98–1.01)  |
| Alabama          | 1991        | 1.0<br>(0.99–1.01)  |
| Alabama          | 1992        | 0.99<br>(0.98–1.01) |
| Alabama          | 1993        | 1.0<br>(0.99–1.02)  |
| Alabama          | 1994        | 1.0<br>(0.99–1.02)  |
| Alabama          | 1995        | 0.99<br>(0.98–1.01) |
| Alabama          | 1996        | 1.0<br>(0.98–1.01)  |

**Table 15 Ratio of adjusted to unadjusted 5q0 values for scaled locations by year**

| <b>Geography</b> | <b>Year</b> | <b>Ratio</b>        |
|------------------|-------------|---------------------|
| Alabama          | 1997        | 1.0<br>(0.98–1.02)  |
| Alabama          | 1998        | 1.01<br>(0.99–1.02) |
| Alabama          | 1999        | 1.0<br>(0.99–1.01)  |
| Alabama          | 2000        | 1.0<br>(0.99–1.01)  |
| Alabama          | 2001        | 0.99<br>(0.98–1.01) |
| Alabama          | 2002        | 1.0<br>(0.98–1.02)  |
| Alabama          | 2003        | 1.0<br>(0.98–1.02)  |
| Alabama          | 2004        | 1.0<br>(0.98–1.01)  |
| Alabama          | 2005        | 1.0<br>(0.99–1.01)  |
| Alabama          | 2006        | 1.0<br>(0.98–1.02)  |
| Alabama          | 2007        | 1.01<br>(0.99–1.02) |
| Alabama          | 2008        | 1.0<br>(0.99–1.02)  |
| Alabama          | 2009        | 1.0<br>(0.98–1.01)  |
| Alabama          | 2010        | 0.99<br>(0.98–1.01) |
| Alabama          | 2011        | 1.0<br>(0.98–1.02)  |
| Alabama          | 2012        | 1.0<br>(0.98–1.02)  |
| Alabama          | 2013        | 1.0<br>(0.98–1.02)  |
| Alabama          | 2014        | 1.0<br>(0.98–1.02)  |
| Alabama          | 2015        | 1.0<br>(0.98–1.03)  |
| Alabama          | 2016        | 1.03<br>(0.93–1.13) |
| Alabama          | 2017        | 1.02<br>(0.87–1.18) |
| Alaska           | 1950        | 0.81<br>(0.67–0.97) |
| Alaska           | 1951        | 0.86<br>(0.71–1.01) |
| Alaska           | 1952        | 0.87<br>(0.74–1.02) |
| Alaska           | 1953        | 0.87<br>(0.73–1.02) |
| Alaska           | 1954        | 0.86<br>(0.72–1.0)  |
| Alaska           | 1955        | 0.87<br>(0.73–1.01) |
| Alaska           | 1956        | 0.89<br>(0.77–1.02) |
| Alaska           | 1957        | 0.93<br>(0.83–1.03) |
| Alaska           | 1958        | 0.96<br>(0.91–1.02) |
| Alaska           | 1959        | 1.0<br>(0.99–1.01)  |



**Table 15 Ratio of adjusted to unadjusted 5q0 values for scaled locations by year**

| <b>Geography</b> | <b>Year</b> | <b>Ratio</b>        |
|------------------|-------------|---------------------|
| Alaska           | 1960        | 1.0<br>(0.99–1.01)  |
| Alaska           | 1961        | 1.0<br>(0.99–1.01)  |
| Alaska           | 1962        | 1.0<br>(0.99–1.01)  |
| Alaska           | 1963        | 1.01<br>(0.99–1.02) |
| Alaska           | 1964        | 1.0<br>(0.99–1.01)  |
| Alaska           | 1965        | 1.0<br>(0.98–1.02)  |
| Alaska           | 1966        | 1.0<br>(0.98–1.02)  |
| Alaska           | 1967        | 1.0<br>(0.98–1.01)  |
| Alaska           | 1968        | 1.0<br>(0.98–1.01)  |
| Alaska           | 1969        | 1.0<br>(0.99–1.02)  |
| Alaska           | 1970        | 1.01<br>(0.99–1.02) |
| Alaska           | 1971        | 1.0<br>(0.98–1.01)  |
| Alaska           | 1972        | 1.0<br>(0.99–1.01)  |
| Alaska           | 1973        | 1.0<br>(0.99–1.02)  |
| Alaska           | 1974        | 1.0<br>(0.99–1.02)  |
| Alaska           | 1975        | 1.0<br>(0.98–1.01)  |
| Alaska           | 1976        | 1.0<br>(0.99–1.02)  |
| Alaska           | 1977        | 1.0<br>(0.98–1.01)  |
| Alaska           | 1978        | 1.0<br>(0.99–1.01)  |
| Alaska           | 1979        | 1.0<br>(0.99–1.01)  |
| Alaska           | 1980        | 1.0<br>(0.99–1.01)  |
| Alaska           | 1981        | 1.0<br>(0.98–1.01)  |
| Alaska           | 1982        | 1.0<br>(0.99–1.01)  |
| Alaska           | 1983        | 1.0<br>(0.98–1.01)  |
| Alaska           | 1984        | 1.0<br>(0.98–1.01)  |
| Alaska           | 1985        | 1.0<br>(0.99–1.02)  |
| Alaska           | 1986        | 1.0<br>(0.99–1.01)  |
| Alaska           | 1987        | 1.0<br>(0.99–1.01)  |
| Alaska           | 1988        | 1.0<br>(0.99–1.02)  |
| Alaska           | 1989        | 1.01<br>(0.99–1.02) |
| Alaska           | 1990        | 1.0<br>(0.98–1.01)  |

**Table 15 Ratio of adjusted to unadjusted 5q0 values for scaled locations by year**

| <b>Geography</b> | <b>Year</b> | <b>Ratio</b>        |
|------------------|-------------|---------------------|
| Alaska           | 1991        | 1.0<br>(0.99–1.01)  |
| Alaska           | 1992        | 0.99<br>(0.98–1.01) |
| Alaska           | 1993        | 1.0<br>(0.99–1.02)  |
| Alaska           | 1994        | 1.0<br>(0.99–1.02)  |
| Alaska           | 1995        | 0.99<br>(0.98–1.01) |
| Alaska           | 1996        | 1.0<br>(0.98–1.01)  |
| Alaska           | 1997        | 1.0<br>(0.98–1.02)  |
| Alaska           | 1998        | 1.01<br>(0.99–1.02) |
| Alaska           | 1999        | 1.0<br>(0.99–1.01)  |
| Alaska           | 2000        | 1.0<br>(0.99–1.01)  |
| Alaska           | 2001        | 0.99<br>(0.98–1.01) |
| Alaska           | 2002        | 1.0<br>(0.98–1.02)  |
| Alaska           | 2003        | 1.0<br>(0.98–1.02)  |
| Alaska           | 2004        | 1.0<br>(0.98–1.01)  |
| Alaska           | 2005        | 1.0<br>(0.99–1.01)  |
| Alaska           | 2006        | 1.0<br>(0.98–1.02)  |
| Alaska           | 2007        | 1.01<br>(0.99–1.02) |
| Alaska           | 2008        | 1.0<br>(0.99–1.02)  |
| Alaska           | 2009        | 1.0<br>(0.98–1.01)  |
| Alaska           | 2010        | 0.99<br>(0.97–1.01) |
| Alaska           | 2011        | 1.0<br>(0.98–1.02)  |
| Alaska           | 2012        | 1.0<br>(0.98–1.02)  |
| Alaska           | 2013        | 1.0<br>(0.98–1.02)  |
| Alaska           | 2014        | 1.0<br>(0.98–1.02)  |
| Alaska           | 2015        | 1.0<br>(0.98–1.03)  |
| Alaska           | 2016        | 1.03<br>(0.93–1.13) |
| Alaska           | 2017        | 1.02<br>(0.87–1.18) |
| Arizona          | 1950        | 0.81<br>(0.67–0.97) |
| Arizona          | 1951        | 0.86<br>(0.71–1.01) |
| Arizona          | 1952        | 0.87<br>(0.74–1.02) |
| Arizona          | 1953        | 0.87<br>(0.74–1.02) |

**Table 15 Ratio of adjusted to unadjusted 5q0 values for scaled locations by year**

| <b>Geography</b> | <b>Year</b> | <b>Ratio</b>        |
|------------------|-------------|---------------------|
| Arizona          | 1954        | 0.86<br>(0.72–1.0)  |
| Arizona          | 1955        | 0.87<br>(0.73–1.01) |
| Arizona          | 1956        | 0.89<br>(0.77–1.02) |
| Arizona          | 1957        | 0.93<br>(0.83–1.03) |
| Arizona          | 1958        | 0.96<br>(0.91–1.02) |
| Arizona          | 1959        | 1.0<br>(0.99–1.01)  |
| Arizona          | 1960        | 1.0<br>(0.99–1.01)  |
| Arizona          | 1961        | 1.0<br>(0.99–1.01)  |
| Arizona          | 1962        | 1.0<br>(0.99–1.01)  |
| Arizona          | 1963        | 1.01<br>(0.99–1.02) |
| Arizona          | 1964        | 1.0<br>(0.99–1.01)  |
| Arizona          | 1965        | 1.0<br>(0.98–1.02)  |
| Arizona          | 1966        | 1.0<br>(0.98–1.02)  |
| Arizona          | 1967        | 1.0<br>(0.98–1.01)  |
| Arizona          | 1968        | 1.0<br>(0.98–1.01)  |
| Arizona          | 1969        | 1.0<br>(0.99–1.02)  |
| Arizona          | 1970        | 1.01<br>(0.99–1.02) |
| Arizona          | 1971        | 1.0<br>(0.98–1.01)  |
| Arizona          | 1972        | 1.0<br>(0.99–1.01)  |
| Arizona          | 1973        | 1.0<br>(0.99–1.02)  |
| Arizona          | 1974        | 1.0<br>(0.99–1.02)  |
| Arizona          | 1975        | 1.0<br>(0.98–1.01)  |
| Arizona          | 1976        | 1.0<br>(0.99–1.02)  |
| Arizona          | 1977        | 1.0<br>(0.98–1.01)  |
| Arizona          | 1978        | 1.0<br>(0.99–1.01)  |
| Arizona          | 1979        | 1.0<br>(0.99–1.01)  |
| Arizona          | 1980        | 1.0<br>(0.99–1.01)  |
| Arizona          | 1981        | 1.0<br>(0.98–1.01)  |
| Arizona          | 1982        | 1.0<br>(0.99–1.01)  |
| Arizona          | 1983        | 1.0<br>(0.98–1.01)  |
| Arizona          | 1984        | 1.0<br>(0.98–1.01)  |

**Table 15 Ratio of adjusted to unadjusted 5q0 values for scaled locations by year**

| <b>Geography</b> | <b>Year</b> | <b>Ratio</b>        |
|------------------|-------------|---------------------|
| Arizona          | 1985        | 1.0<br>(0.99–1.02)  |
| Arizona          | 1986        | 1.0<br>(0.99–1.01)  |
| Arizona          | 1987        | 1.0<br>(0.99–1.01)  |
| Arizona          | 1988        | 1.0<br>(0.99–1.02)  |
| Arizona          | 1989        | 1.01<br>(0.99–1.02) |
| Arizona          | 1990        | 1.0<br>(0.98–1.01)  |
| Arizona          | 1991        | 1.0<br>(0.99–1.01)  |
| Arizona          | 1992        | 0.99<br>(0.98–1.01) |
| Arizona          | 1993        | 1.0<br>(0.99–1.02)  |
| Arizona          | 1994        | 1.0<br>(0.99–1.02)  |
| Arizona          | 1995        | 0.99<br>(0.98–1.01) |
| Arizona          | 1996        | 1.0<br>(0.98–1.01)  |
| Arizona          | 1997        | 1.0<br>(0.98–1.02)  |
| Arizona          | 1998        | 1.01<br>(0.99–1.02) |
| Arizona          | 1999        | 1.0<br>(0.99–1.01)  |
| Arizona          | 2000        | 1.0<br>(0.99–1.01)  |
| Arizona          | 2001        | 0.99<br>(0.98–1.01) |
| Arizona          | 2002        | 1.0<br>(0.98–1.02)  |
| Arizona          | 2003        | 1.0<br>(0.98–1.02)  |
| Arizona          | 2004        | 1.0<br>(0.98–1.01)  |
| Arizona          | 2005        | 1.0<br>(0.99–1.01)  |
| Arizona          | 2006        | 1.0<br>(0.98–1.02)  |
| Arizona          | 2007        | 1.01<br>(0.99–1.02) |
| Arizona          | 2008        | 1.0<br>(0.99–1.02)  |
| Arizona          | 2009        | 1.0<br>(0.98–1.01)  |
| Arizona          | 2010        | 0.99<br>(0.97–1.01) |
| Arizona          | 2011        | 1.0<br>(0.98–1.02)  |
| Arizona          | 2012        | 1.0<br>(0.98–1.02)  |
| Arizona          | 2013        | 1.0<br>(0.98–1.02)  |
| Arizona          | 2014        | 1.0<br>(0.98–1.02)  |
| Arizona          | 2015        | 1.0<br>(0.98–1.03)  |

**Table 15 Ratio of adjusted to unadjusted 5q0 values for scaled locations by year**

| <b>Geography</b> | <b>Year</b> | <b>Ratio</b>        |
|------------------|-------------|---------------------|
| Arizona          | 2016        | 1.03<br>(0.93–1.13) |
| Arizona          | 2017        | 1.02<br>(0.87–1.18) |
| Arkansas         | 1950        | 0.81<br>(0.67–0.97) |
| Arkansas         | 1951        | 0.86<br>(0.71–1.01) |
| Arkansas         | 1952        | 0.87<br>(0.74–1.02) |
| Arkansas         | 1953        | 0.87<br>(0.73–1.02) |
| Arkansas         | 1954        | 0.85<br>(0.71–1.0)  |
| Arkansas         | 1955        | 0.87<br>(0.73–1.01) |
| Arkansas         | 1956        | 0.89<br>(0.77–1.02) |
| Arkansas         | 1957        | 0.93<br>(0.83–1.03) |
| Arkansas         | 1958        | 0.96<br>(0.91–1.02) |
| Arkansas         | 1959        | 1.0<br>(0.99–1.01)  |
| Arkansas         | 1960        | 1.0<br>(0.99–1.01)  |
| Arkansas         | 1961        | 1.0<br>(0.99–1.01)  |
| Arkansas         | 1962        | 1.0<br>(0.99–1.01)  |
| Arkansas         | 1963        | 1.01<br>(0.99–1.02) |
| Arkansas         | 1964        | 1.0<br>(0.99–1.01)  |
| Arkansas         | 1965        | 1.0<br>(0.98–1.02)  |
| Arkansas         | 1966        | 1.0<br>(0.98–1.02)  |
| Arkansas         | 1967        | 1.0<br>(0.98–1.01)  |
| Arkansas         | 1968        | 1.0<br>(0.98–1.01)  |
| Arkansas         | 1969        | 1.0<br>(0.99–1.02)  |
| Arkansas         | 1970        | 1.01<br>(0.99–1.02) |
| Arkansas         | 1971        | 1.0<br>(0.98–1.01)  |
| Arkansas         | 1972        | 1.0<br>(0.99–1.01)  |
| Arkansas         | 1973        | 1.0<br>(0.99–1.02)  |
| Arkansas         | 1974        | 1.0<br>(0.99–1.02)  |
| Arkansas         | 1975        | 1.0<br>(0.98–1.01)  |
| Arkansas         | 1976        | 1.0<br>(0.99–1.02)  |
| Arkansas         | 1977        | 1.0<br>(0.98–1.01)  |
| Arkansas         | 1978        | 1.0<br>(0.99–1.01)  |

**Table 15 Ratio of adjusted to unadjusted 5q0 values for scaled locations by year**

| <b>Geography</b> | <b>Year</b> | <b>Ratio</b>        |
|------------------|-------------|---------------------|
| Arkansas         | 1979        | 1.0<br>(0.99–1.01)  |
| Arkansas         | 1980        | 1.0<br>(0.99–1.01)  |
| Arkansas         | 1981        | 1.0<br>(0.98–1.01)  |
| Arkansas         | 1982        | 1.0<br>(0.99–1.01)  |
| Arkansas         | 1983        | 1.0<br>(0.98–1.01)  |
| Arkansas         | 1984        | 1.0<br>(0.98–1.01)  |
| Arkansas         | 1985        | 1.0<br>(0.99–1.02)  |
| Arkansas         | 1986        | 1.0<br>(0.99–1.01)  |
| Arkansas         | 1987        | 1.0<br>(0.99–1.01)  |
| Arkansas         | 1988        | 1.0<br>(0.99–1.02)  |
| Arkansas         | 1989        | 1.01<br>(0.99–1.02) |
| Arkansas         | 1990        | 1.0<br>(0.98–1.01)  |
| Arkansas         | 1991        | 1.0<br>(0.99–1.01)  |
| Arkansas         | 1992        | 0.99<br>(0.98–1.01) |
| Arkansas         | 1993        | 1.0<br>(0.99–1.02)  |
| Arkansas         | 1994        | 1.0<br>(0.99–1.02)  |
| Arkansas         | 1995        | 0.99<br>(0.98–1.01) |
| Arkansas         | 1996        | 1.0<br>(0.98–1.01)  |
| Arkansas         | 1997        | 1.0<br>(0.98–1.02)  |
| Arkansas         | 1998        | 1.01<br>(0.99–1.02) |
| Arkansas         | 1999        | 1.0<br>(0.99–1.01)  |
| Arkansas         | 2000        | 1.0<br>(0.99–1.01)  |
| Arkansas         | 2001        | 0.99<br>(0.98–1.01) |
| Arkansas         | 2002        | 1.0<br>(0.98–1.02)  |
| Arkansas         | 2003        | 1.0<br>(0.98–1.02)  |
| Arkansas         | 2004        | 1.0<br>(0.98–1.01)  |
| Arkansas         | 2005        | 1.0<br>(0.99–1.01)  |
| Arkansas         | 2006        | 1.0<br>(0.98–1.02)  |
| Arkansas         | 2007        | 1.01<br>(0.99–1.02) |
| Arkansas         | 2008        | 1.0<br>(0.99–1.02)  |
| Arkansas         | 2009        | 1.0<br>(0.98–1.01)  |

**Table 15 Ratio of adjusted to unadjusted 5q0 values for scaled locations by year**

| <b>Geography</b> | <b>Year</b> | <b>Ratio</b>        |
|------------------|-------------|---------------------|
| Arkansas         | 2010        | 0.99<br>(0.97–1.01) |
| Arkansas         | 2011        | 1.0<br>(0.98–1.02)  |
| Arkansas         | 2012        | 1.0<br>(0.98–1.02)  |
| Arkansas         | 2013        | 1.0<br>(0.98–1.02)  |
| Arkansas         | 2014        | 1.0<br>(0.98–1.02)  |
| Arkansas         | 2015        | 1.0<br>(0.98–1.03)  |
| Arkansas         | 2016        | 1.03<br>(0.93–1.13) |
| Arkansas         | 2017        | 1.02<br>(0.87–1.18) |
| California       | 1950        | 0.81<br>(0.67–0.97) |
| California       | 1951        | 0.86<br>(0.71–1.01) |
| California       | 1952        | 0.87<br>(0.74–1.02) |
| California       | 1953        | 0.87<br>(0.73–1.02) |
| California       | 1954        | 0.85<br>(0.71–1.0)  |
| California       | 1955        | 0.87<br>(0.73–1.01) |
| California       | 1956        | 0.89<br>(0.77–1.02) |
| California       | 1957        | 0.93<br>(0.83–1.03) |
| California       | 1958        | 0.96<br>(0.9–1.02)  |
| California       | 1959        | 1.0<br>(0.99–1.01)  |
| California       | 1960        | 1.0<br>(0.99–1.01)  |
| California       | 1961        | 1.0<br>(0.99–1.01)  |
| California       | 1962        | 1.0<br>(0.99–1.01)  |
| California       | 1963        | 1.01<br>(0.99–1.02) |
| California       | 1964        | 1.0<br>(0.99–1.01)  |
| California       | 1965        | 1.0<br>(0.98–1.02)  |
| California       | 1966        | 1.0<br>(0.98–1.02)  |
| California       | 1967        | 1.0<br>(0.98–1.01)  |
| California       | 1968        | 1.0<br>(0.98–1.01)  |
| California       | 1969        | 1.0<br>(0.99–1.02)  |
| California       | 1970        | 1.01<br>(0.99–1.02) |
| California       | 1971        | 1.0<br>(0.98–1.01)  |
| California       | 1972        | 1.0<br>(0.99–1.01)  |

**Table 15 Ratio of adjusted to unadjusted 5q0 values for scaled locations by year**

| <b>Geography</b> | <b>Year</b> | <b>Ratio</b>        |
|------------------|-------------|---------------------|
| California       | 1973        | 1.0<br>(0.99–1.02)  |
| California       | 1974        | 1.0<br>(0.99–1.02)  |
| California       | 1975        | 1.0<br>(0.98–1.01)  |
| California       | 1976        | 1.0<br>(0.99–1.02)  |
| California       | 1977        | 1.0<br>(0.98–1.01)  |
| California       | 1978        | 1.0<br>(0.99–1.01)  |
| California       | 1979        | 1.0<br>(0.99–1.01)  |
| California       | 1980        | 1.0<br>(0.99–1.01)  |
| California       | 1981        | 1.0<br>(0.98–1.01)  |
| California       | 1982        | 1.0<br>(0.99–1.01)  |
| California       | 1983        | 1.0<br>(0.98–1.01)  |
| California       | 1984        | 1.0<br>(0.98–1.01)  |
| California       | 1985        | 1.0<br>(0.99–1.02)  |
| California       | 1986        | 1.0<br>(0.99–1.01)  |
| California       | 1987        | 1.0<br>(0.99–1.01)  |
| California       | 1988        | 1.0<br>(0.99–1.02)  |
| California       | 1989        | 1.01<br>(0.99–1.02) |
| California       | 1990        | 1.0<br>(0.98–1.01)  |
| California       | 1991        | 1.0<br>(0.99–1.01)  |
| California       | 1992        | 0.99<br>(0.98–1.01) |
| California       | 1993        | 1.0<br>(0.99–1.02)  |
| California       | 1994        | 1.0<br>(0.99–1.02)  |
| California       | 1995        | 0.99<br>(0.98–1.01) |
| California       | 1996        | 1.0<br>(0.98–1.01)  |
| California       | 1997        | 1.0<br>(0.98–1.02)  |
| California       | 1998        | 1.01<br>(0.99–1.02) |
| California       | 1999        | 1.0<br>(0.99–1.01)  |
| California       | 2000        | 1.0<br>(0.99–1.01)  |
| California       | 2001        | 0.99<br>(0.98–1.01) |
| California       | 2002        | 1.0<br>(0.98–1.02)  |
| California       | 2003        | 1.0<br>(0.98–1.02)  |



**Table 15 Ratio of adjusted to unadjusted 5q0 values for scaled locations by year**

| <b>Geography</b> | <b>Year</b> | <b>Ratio</b>        |
|------------------|-------------|---------------------|
| California       | 2004        | 1.0<br>(0.98–1.01)  |
| California       | 2005        | 1.0<br>(0.99–1.01)  |
| California       | 2006        | 1.0<br>(0.98–1.02)  |
| California       | 2007        | 1.01<br>(0.99–1.02) |
| California       | 2008        | 1.0<br>(0.99–1.02)  |
| California       | 2009        | 1.0<br>(0.98–1.01)  |
| California       | 2010        | 0.99<br>(0.97–1.01) |
| California       | 2011        | 1.0<br>(0.98–1.02)  |
| California       | 2012        | 1.0<br>(0.98–1.02)  |
| California       | 2013        | 1.0<br>(0.98–1.02)  |
| California       | 2014        | 1.0<br>(0.98–1.02)  |
| California       | 2015        | 1.0<br>(0.98–1.03)  |
| California       | 2016        | 1.03<br>(0.93–1.13) |
| California       | 2017        | 1.02<br>(0.87–1.18) |
| Colorado         | 1950        | 0.81<br>(0.67–0.97) |
| Colorado         | 1951        | 0.86<br>(0.71–1.01) |
| Colorado         | 1952        | 0.87<br>(0.74–1.02) |
| Colorado         | 1953        | 0.87<br>(0.73–1.02) |
| Colorado         | 1954        | 0.85<br>(0.71–1.0)  |
| Colorado         | 1955        | 0.87<br>(0.73–1.01) |
| Colorado         | 1956        | 0.89<br>(0.77–1.02) |
| Colorado         | 1957        | 0.93<br>(0.83–1.03) |
| Colorado         | 1958        | 0.96<br>(0.91–1.02) |
| Colorado         | 1959        | 1.0<br>(0.99–1.01)  |
| Colorado         | 1960        | 1.0<br>(0.99–1.01)  |
| Colorado         | 1961        | 1.0<br>(0.99–1.01)  |
| Colorado         | 1962        | 1.0<br>(0.99–1.01)  |
| Colorado         | 1963        | 1.01<br>(0.99–1.02) |
| Colorado         | 1964        | 1.0<br>(0.99–1.01)  |
| Colorado         | 1965        | 1.0<br>(0.98–1.02)  |
| Colorado         | 1966        | 1.0<br>(0.98–1.02)  |

**Table 15 Ratio of adjusted to unadjusted 5q0 values for scaled locations by year**

| <b>Geography</b> | <b>Year</b> | <b>Ratio</b>        |
|------------------|-------------|---------------------|
| Colorado         | 1967        | 1.0<br>(0.98–1.01)  |
| Colorado         | 1968        | 1.0<br>(0.98–1.01)  |
| Colorado         | 1969        | 1.0<br>(0.99–1.02)  |
| Colorado         | 1970        | 1.01<br>(0.99–1.02) |
| Colorado         | 1971        | 1.0<br>(0.98–1.01)  |
| Colorado         | 1972        | 1.0<br>(0.99–1.01)  |
| Colorado         | 1973        | 1.0<br>(0.99–1.02)  |
| Colorado         | 1974        | 1.0<br>(0.99–1.02)  |
| Colorado         | 1975        | 1.0<br>(0.98–1.01)  |
| Colorado         | 1976        | 1.0<br>(0.99–1.02)  |
| Colorado         | 1977        | 1.0<br>(0.98–1.01)  |
| Colorado         | 1978        | 1.0<br>(0.99–1.01)  |
| Colorado         | 1979        | 1.0<br>(0.99–1.01)  |
| Colorado         | 1980        | 1.0<br>(0.99–1.01)  |
| Colorado         | 1981        | 1.0<br>(0.98–1.01)  |
| Colorado         | 1982        | 1.0<br>(0.99–1.01)  |
| Colorado         | 1983        | 1.0<br>(0.98–1.01)  |
| Colorado         | 1984        | 1.0<br>(0.98–1.01)  |
| Colorado         | 1985        | 1.0<br>(0.99–1.02)  |
| Colorado         | 1986        | 1.0<br>(0.99–1.01)  |
| Colorado         | 1987        | 1.0<br>(0.99–1.01)  |
| Colorado         | 1988        | 1.0<br>(0.99–1.02)  |
| Colorado         | 1989        | 1.01<br>(0.99–1.02) |
| Colorado         | 1990        | 1.0<br>(0.98–1.01)  |
| Colorado         | 1991        | 1.0<br>(0.99–1.01)  |
| Colorado         | 1992        | 0.99<br>(0.98–1.01) |
| Colorado         | 1993        | 1.0<br>(0.99–1.02)  |
| Colorado         | 1994        | 1.0<br>(0.99–1.02)  |
| Colorado         | 1995        | 0.99<br>(0.98–1.01) |
| Colorado         | 1996        | 1.0<br>(0.98–1.01)  |
| Colorado         | 1997        | 1.0<br>(0.98–1.02)  |

**Table 15 Ratio of adjusted to unadjusted 5q0 values for scaled locations by year**

| <b>Geography</b> | <b>Year</b> | <b>Ratio</b>        |
|------------------|-------------|---------------------|
| Colorado         | 1998        | 1.01<br>(0.99–1.02) |
| Colorado         | 1999        | 1.0<br>(0.99–1.01)  |
| Colorado         | 2000        | 1.0<br>(0.99–1.01)  |
| Colorado         | 2001        | 0.99<br>(0.98–1.01) |
| Colorado         | 2002        | 1.0<br>(0.98–1.02)  |
| Colorado         | 2003        | 1.0<br>(0.98–1.02)  |
| Colorado         | 2004        | 1.0<br>(0.98–1.01)  |
| Colorado         | 2005        | 1.0<br>(0.99–1.01)  |
| Colorado         | 2006        | 1.0<br>(0.98–1.02)  |
| Colorado         | 2007        | 1.01<br>(0.99–1.02) |
| Colorado         | 2008        | 1.0<br>(0.99–1.02)  |
| Colorado         | 2009        | 1.0<br>(0.98–1.01)  |
| Colorado         | 2010        | 0.99<br>(0.97–1.01) |
| Colorado         | 2011        | 1.0<br>(0.98–1.02)  |
| Colorado         | 2012        | 1.0<br>(0.98–1.02)  |
| Colorado         | 2013        | 1.0<br>(0.98–1.02)  |
| Colorado         | 2014        | 1.0<br>(0.98–1.02)  |
| Colorado         | 2015        | 1.0<br>(0.98–1.03)  |
| Colorado         | 2016        | 1.03<br>(0.93–1.13) |
| Colorado         | 2017        | 1.02<br>(0.87–1.18) |
| Connecticut      | 1950        | 0.81<br>(0.67–0.97) |
| Connecticut      | 1951        | 0.86<br>(0.71–1.01) |
| Connecticut      | 1952        | 0.87<br>(0.74–1.02) |
| Connecticut      | 1953        | 0.87<br>(0.73–1.02) |
| Connecticut      | 1954        | 0.85<br>(0.71–1.0)  |
| Connecticut      | 1955        | 0.87<br>(0.73–1.01) |
| Connecticut      | 1956        | 0.89<br>(0.77–1.02) |
| Connecticut      | 1957        | 0.93<br>(0.83–1.03) |
| Connecticut      | 1958        | 0.96<br>(0.9–1.02)  |
| Connecticut      | 1959        | 1.0<br>(0.99–1.01)  |
| Connecticut      | 1960        | 1.0<br>(0.99–1.01)  |

**Table 15 Ratio of adjusted to unadjusted 5q0 values for scaled locations by year**

| <b>Geography</b> | <b>Year</b> | <b>Ratio</b>        |
|------------------|-------------|---------------------|
| Connecticut      | 1961        | 1.0<br>(0.99–1.01)  |
| Connecticut      | 1962        | 1.0<br>(0.99–1.01)  |
| Connecticut      | 1963        | 1.01<br>(0.99–1.02) |
| Connecticut      | 1964        | 1.0<br>(0.99–1.01)  |
| Connecticut      | 1965        | 1.0<br>(0.98–1.02)  |
| Connecticut      | 1966        | 1.0<br>(0.98–1.02)  |
| Connecticut      | 1967        | 1.0<br>(0.98–1.01)  |
| Connecticut      | 1968        | 1.0<br>(0.98–1.01)  |
| Connecticut      | 1969        | 1.0<br>(0.99–1.02)  |
| Connecticut      | 1970        | 1.01<br>(0.99–1.02) |
| Connecticut      | 1971        | 1.0<br>(0.98–1.01)  |
| Connecticut      | 1972        | 1.0<br>(0.99–1.01)  |
| Connecticut      | 1973        | 1.0<br>(0.99–1.02)  |
| Connecticut      | 1974        | 1.0<br>(0.99–1.02)  |
| Connecticut      | 1975        | 1.0<br>(0.98–1.01)  |
| Connecticut      | 1976        | 1.0<br>(0.99–1.02)  |
| Connecticut      | 1977        | 1.0<br>(0.98–1.01)  |
| Connecticut      | 1978        | 1.0<br>(0.99–1.01)  |
| Connecticut      | 1979        | 1.0<br>(0.99–1.01)  |
| Connecticut      | 1980        | 1.0<br>(0.99–1.01)  |
| Connecticut      | 1981        | 1.0<br>(0.98–1.01)  |
| Connecticut      | 1982        | 1.0<br>(0.99–1.01)  |
| Connecticut      | 1983        | 1.0<br>(0.98–1.01)  |
| Connecticut      | 1984        | 1.0<br>(0.98–1.01)  |
| Connecticut      | 1985        | 1.0<br>(0.99–1.02)  |
| Connecticut      | 1986        | 1.0<br>(0.99–1.01)  |
| Connecticut      | 1987        | 1.0<br>(0.99–1.01)  |
| Connecticut      | 1988        | 1.0<br>(0.99–1.02)  |
| Connecticut      | 1989        | 1.01<br>(0.99–1.02) |
| Connecticut      | 1990        | 1.0<br>(0.98–1.01)  |
| Connecticut      | 1991        | 1.0<br>(0.99–1.01)  |

**Table 15 Ratio of adjusted to unadjusted 5q0 values for scaled locations by year**

| <b>Geography</b> | <b>Year</b> | <b>Ratio</b>        |
|------------------|-------------|---------------------|
| Connecticut      | 1992        | 0.99<br>(0.98–1.01) |
| Connecticut      | 1993        | 1.0<br>(0.99–1.02)  |
| Connecticut      | 1994        | 1.0<br>(0.99–1.02)  |
| Connecticut      | 1995        | 0.99<br>(0.98–1.01) |
| Connecticut      | 1996        | 1.0<br>(0.98–1.01)  |
| Connecticut      | 1997        | 1.0<br>(0.98–1.02)  |
| Connecticut      | 1998        | 1.01<br>(0.99–1.02) |
| Connecticut      | 1999        | 1.0<br>(0.99–1.01)  |
| Connecticut      | 2000        | 1.0<br>(0.99–1.01)  |
| Connecticut      | 2001        | 0.99<br>(0.98–1.01) |
| Connecticut      | 2002        | 1.0<br>(0.98–1.02)  |
| Connecticut      | 2003        | 1.0<br>(0.98–1.02)  |
| Connecticut      | 2004        | 1.0<br>(0.98–1.01)  |
| Connecticut      | 2005        | 1.0<br>(0.99–1.01)  |
| Connecticut      | 2006        | 1.0<br>(0.98–1.02)  |
| Connecticut      | 2007        | 1.01<br>(0.99–1.02) |
| Connecticut      | 2008        | 1.0<br>(0.99–1.02)  |
| Connecticut      | 2009        | 1.0<br>(0.98–1.01)  |
| Connecticut      | 2010        | 0.99<br>(0.97–1.01) |
| Connecticut      | 2011        | 1.0<br>(0.98–1.02)  |
| Connecticut      | 2012        | 1.0<br>(0.98–1.02)  |
| Connecticut      | 2013        | 1.0<br>(0.98–1.02)  |
| Connecticut      | 2014        | 1.0<br>(0.98–1.02)  |
| Connecticut      | 2015        | 1.0<br>(0.98–1.03)  |
| Connecticut      | 2016        | 1.03<br>(0.93–1.13) |
| Connecticut      | 2017        | 1.02<br>(0.87–1.18) |
| Delaware         | 1950        | 0.81<br>(0.67–0.97) |
| Delaware         | 1951        | 0.86<br>(0.71–1.01) |
| Delaware         | 1952        | 0.87<br>(0.74–1.02) |
| Delaware         | 1953        | 0.87<br>(0.73–1.02) |
| Delaware         | 1954        | 0.85<br>(0.71–1.0)  |

**Table 15 Ratio of adjusted to unadjusted 5q0 values for scaled locations by year**

| <b>Geography</b> | <b>Year</b> | <b>Ratio</b>        |
|------------------|-------------|---------------------|
| Delaware         | 1955        | 0.87<br>(0.73–1.01) |
| Delaware         | 1956        | 0.89<br>(0.77–1.02) |
| Delaware         | 1957        | 0.93<br>(0.83–1.03) |
| Delaware         | 1958        | 0.96<br>(0.9–1.02)  |
| Delaware         | 1959        | 1.0<br>(0.99–1.01)  |
| Delaware         | 1960        | 1.0<br>(0.99–1.01)  |
| Delaware         | 1961        | 1.0<br>(0.99–1.01)  |
| Delaware         | 1962        | 1.0<br>(0.99–1.01)  |
| Delaware         | 1963        | 1.01<br>(0.99–1.02) |
| Delaware         | 1964        | 1.0<br>(0.99–1.01)  |
| Delaware         | 1965        | 1.0<br>(0.98–1.02)  |
| Delaware         | 1966        | 1.0<br>(0.98–1.02)  |
| Delaware         | 1967        | 1.0<br>(0.98–1.01)  |
| Delaware         | 1968        | 1.0<br>(0.98–1.01)  |
| Delaware         | 1969        | 1.0<br>(0.99–1.02)  |
| Delaware         | 1970        | 1.01<br>(0.99–1.02) |
| Delaware         | 1971        | 1.0<br>(0.98–1.01)  |
| Delaware         | 1972        | 1.0<br>(0.99–1.01)  |
| Delaware         | 1973        | 1.0<br>(0.99–1.02)  |
| Delaware         | 1974        | 1.0<br>(0.99–1.02)  |
| Delaware         | 1975        | 1.0<br>(0.98–1.01)  |
| Delaware         | 1976        | 1.0<br>(0.99–1.02)  |
| Delaware         | 1977        | 1.0<br>(0.98–1.01)  |
| Delaware         | 1978        | 1.0<br>(0.99–1.01)  |
| Delaware         | 1979        | 1.0<br>(0.99–1.01)  |
| Delaware         | 1980        | 1.0<br>(0.99–1.01)  |
| Delaware         | 1981        | 1.0<br>(0.98–1.01)  |
| Delaware         | 1982        | 1.0<br>(0.99–1.01)  |
| Delaware         | 1983        | 1.0<br>(0.98–1.01)  |
| Delaware         | 1984        | 1.0<br>(0.98–1.01)  |
| Delaware         | 1985        | 1.0<br>(0.99–1.02)  |

**Table 15 Ratio of adjusted to unadjusted 5q0 values for scaled locations by year**

| <b>Geography</b> | <b>Year</b> | <b>Ratio</b>        |
|------------------|-------------|---------------------|
| Delaware         | 1986        | 1.0<br>(0.99–1.01)  |
| Delaware         | 1987        | 1.0<br>(0.99–1.01)  |
| Delaware         | 1988        | 1.0<br>(0.99–1.02)  |
| Delaware         | 1989        | 1.01<br>(0.99–1.02) |
| Delaware         | 1990        | 1.0<br>(0.98–1.01)  |
| Delaware         | 1991        | 1.0<br>(0.99–1.01)  |
| Delaware         | 1992        | 0.99<br>(0.98–1.01) |
| Delaware         | 1993        | 1.0<br>(0.99–1.02)  |
| Delaware         | 1994        | 1.0<br>(0.99–1.02)  |
| Delaware         | 1995        | 0.99<br>(0.98–1.01) |
| Delaware         | 1996        | 1.0<br>(0.98–1.01)  |
| Delaware         | 1997        | 1.0<br>(0.98–1.02)  |
| Delaware         | 1998        | 1.01<br>(0.99–1.02) |
| Delaware         | 1999        | 1.0<br>(0.99–1.01)  |
| Delaware         | 2000        | 1.0<br>(0.99–1.01)  |
| Delaware         | 2001        | 0.99<br>(0.98–1.01) |
| Delaware         | 2002        | 1.0<br>(0.98–1.02)  |
| Delaware         | 2003        | 1.0<br>(0.98–1.02)  |
| Delaware         | 2004        | 1.0<br>(0.98–1.01)  |
| Delaware         | 2005        | 1.0<br>(0.99–1.01)  |
| Delaware         | 2006        | 1.0<br>(0.98–1.02)  |
| Delaware         | 2007        | 1.01<br>(0.99–1.02) |
| Delaware         | 2008        | 1.0<br>(0.99–1.02)  |
| Delaware         | 2009        | 1.0<br>(0.98–1.01)  |
| Delaware         | 2010        | 0.99<br>(0.97–1.01) |
| Delaware         | 2011        | 1.0<br>(0.98–1.02)  |
| Delaware         | 2012        | 1.0<br>(0.98–1.02)  |
| Delaware         | 2013        | 1.0<br>(0.98–1.02)  |
| Delaware         | 2014        | 1.0<br>(0.98–1.02)  |
| Delaware         | 2015        | 1.0<br>(0.98–1.03)  |
| Delaware         | 2016        | 1.03<br>(0.93–1.13) |

**Table 15 Ratio of adjusted to unadjusted 5q0 values for scaled locations by year**

| <b>Geography</b>     | <b>Year</b> | <b>Ratio</b>        |
|----------------------|-------------|---------------------|
| Delaware             | 2017        | 1.02<br>(0.87–1.18) |
| District of Columbia | 1950        | 0.81<br>(0.67–0.97) |
| District of Columbia | 1951        | 0.86<br>(0.71–1.01) |
| District of Columbia | 1952        | 0.87<br>(0.74–1.02) |
| District of Columbia | 1953        | 0.87<br>(0.73–1.02) |
| District of Columbia | 1954        | 0.86<br>(0.72–1.0)  |
| District of Columbia | 1955        | 0.87<br>(0.73–1.01) |
| District of Columbia | 1956        | 0.89<br>(0.77–1.02) |
| District of Columbia | 1957        | 0.93<br>(0.83–1.03) |
| District of Columbia | 1958        | 0.96<br>(0.91–1.02) |
| District of Columbia | 1959        | 1.0<br>(0.99–1.01)  |
| District of Columbia | 1960        | 1.0<br>(0.99–1.01)  |
| District of Columbia | 1961        | 1.0<br>(0.99–1.01)  |
| District of Columbia | 1962        | 1.0<br>(0.99–1.01)  |
| District of Columbia | 1963        | 1.01<br>(0.99–1.02) |
| District of Columbia | 1964        | 1.0<br>(0.99–1.01)  |
| District of Columbia | 1965        | 1.0<br>(0.98–1.02)  |
| District of Columbia | 1966        | 1.0<br>(0.98–1.02)  |
| District of Columbia | 1967        | 1.0<br>(0.98–1.01)  |
| District of Columbia | 1968        | 1.0<br>(0.98–1.01)  |
| District of Columbia | 1969        | 1.0<br>(0.99–1.02)  |
| District of Columbia | 1970        | 1.01<br>(0.99–1.02) |
| District of Columbia | 1971        | 1.0<br>(0.98–1.01)  |
| District of Columbia | 1972        | 1.0<br>(0.99–1.01)  |
| District of Columbia | 1973        | 1.0<br>(0.99–1.02)  |
| District of Columbia | 1974        | 1.0<br>(0.99–1.02)  |
| District of Columbia | 1975        | 1.0<br>(0.98–1.01)  |
| District of Columbia | 1976        | 1.0<br>(0.99–1.02)  |
| District of Columbia | 1977        | 1.0<br>(0.98–1.01)  |
| District of Columbia | 1978        | 1.0<br>(0.99–1.01)  |
| District of Columbia | 1979        | 1.0<br>(0.99–1.01)  |



**Table 15 Ratio of adjusted to unadjusted 5q0 values for scaled locations by year**

| <b>Geography</b>     | <b>Year</b> | <b>Ratio</b>        |
|----------------------|-------------|---------------------|
| District of Columbia | 1980        | 1.0<br>(0.99–1.01)  |
| District of Columbia | 1981        | 1.0<br>(0.98–1.01)  |
| District of Columbia | 1982        | 1.0<br>(0.99–1.01)  |
| District of Columbia | 1983        | 1.0<br>(0.98–1.01)  |
| District of Columbia | 1984        | 1.0<br>(0.98–1.01)  |
| District of Columbia | 1985        | 1.0<br>(0.99–1.02)  |
| District of Columbia | 1986        | 1.0<br>(0.99–1.01)  |
| District of Columbia | 1987        | 1.0<br>(0.99–1.01)  |
| District of Columbia | 1988        | 1.0<br>(0.99–1.02)  |
| District of Columbia | 1989        | 1.01<br>(0.99–1.02) |
| District of Columbia | 1990        | 1.0<br>(0.98–1.01)  |
| District of Columbia | 1991        | 1.0<br>(0.99–1.01)  |
| District of Columbia | 1992        | 1.0<br>(0.98–1.01)  |
| District of Columbia | 1993        | 1.0<br>(0.99–1.02)  |
| District of Columbia | 1994        | 1.0<br>(0.99–1.02)  |
| District of Columbia | 1995        | 0.99<br>(0.98–1.01) |
| District of Columbia | 1996        | 1.0<br>(0.98–1.01)  |
| District of Columbia | 1997        | 1.0<br>(0.98–1.02)  |
| District of Columbia | 1998        | 1.01<br>(0.99–1.02) |
| District of Columbia | 1999        | 1.0<br>(0.99–1.01)  |
| District of Columbia | 2000        | 1.0<br>(0.99–1.01)  |
| District of Columbia | 2001        | 0.99<br>(0.98–1.01) |
| District of Columbia | 2002        | 1.0<br>(0.98–1.02)  |
| District of Columbia | 2003        | 1.0<br>(0.98–1.02)  |
| District of Columbia | 2004        | 1.0<br>(0.98–1.01)  |
| District of Columbia | 2005        | 1.0<br>(0.99–1.01)  |
| District of Columbia | 2006        | 1.0<br>(0.98–1.02)  |
| District of Columbia | 2007        | 1.01<br>(0.99–1.02) |
| District of Columbia | 2008        | 1.0<br>(0.99–1.02)  |
| District of Columbia | 2009        | 1.0<br>(0.98–1.01)  |
| District of Columbia | 2010        | 0.99<br>(0.98–1.01) |

**Table 15 Ratio of adjusted to unadjusted 5q0 values for scaled locations by year**

| <b>Geography</b>     | <b>Year</b> | <b>Ratio</b>        |
|----------------------|-------------|---------------------|
| District of Columbia | 2011        | 1.0<br>(0.98–1.02)  |
| District of Columbia | 2012        | 1.0<br>(0.98–1.02)  |
| District of Columbia | 2013        | 1.0<br>(0.98–1.02)  |
| District of Columbia | 2014        | 1.0<br>(0.98–1.02)  |
| District of Columbia | 2015        | 1.0<br>(0.98–1.03)  |
| District of Columbia | 2016        | 1.03<br>(0.93–1.13) |
| District of Columbia | 2017        | 1.02<br>(0.87–1.18) |
| Florida              | 1950        | 0.81<br>(0.67–0.97) |
| Florida              | 1951        | 0.86<br>(0.71–1.01) |
| Florida              | 1952        | 0.87<br>(0.74–1.02) |
| Florida              | 1953        | 0.87<br>(0.73–1.02) |
| Florida              | 1954        | 0.86<br>(0.72–1.0)  |
| Florida              | 1955        | 0.87<br>(0.73–1.01) |
| Florida              | 1956        | 0.89<br>(0.77–1.02) |
| Florida              | 1957        | 0.93<br>(0.83–1.03) |
| Florida              | 1958        | 0.96<br>(0.91–1.02) |
| Florida              | 1959        | 1.0<br>(0.99–1.01)  |
| Florida              | 1960        | 1.0<br>(0.99–1.01)  |
| Florida              | 1961        | 1.0<br>(0.99–1.01)  |
| Florida              | 1962        | 1.0<br>(0.99–1.01)  |
| Florida              | 1963        | 1.01<br>(0.99–1.02) |
| Florida              | 1964        | 1.0<br>(0.99–1.01)  |
| Florida              | 1965        | 1.0<br>(0.98–1.02)  |
| Florida              | 1966        | 1.0<br>(0.98–1.02)  |
| Florida              | 1967        | 1.0<br>(0.98–1.01)  |
| Florida              | 1968        | 1.0<br>(0.98–1.01)  |
| Florida              | 1969        | 1.0<br>(0.99–1.02)  |
| Florida              | 1970        | 1.01<br>(0.99–1.02) |
| Florida              | 1971        | 1.0<br>(0.98–1.01)  |
| Florida              | 1972        | 1.0<br>(0.99–1.01)  |
| Florida              | 1973        | 1.0<br>(0.99–1.02)  |

**Table 15 Ratio of adjusted to unadjusted 5q0 values for scaled locations by year**

| <b>Geography</b> | <b>Year</b> | <b>Ratio</b>        |
|------------------|-------------|---------------------|
| Florida          | 1974        | 1.0<br>(0.99–1.02)  |
| Florida          | 1975        | 1.0<br>(0.98–1.01)  |
| Florida          | 1976        | 1.0<br>(0.99–1.02)  |
| Florida          | 1977        | 1.0<br>(0.98–1.01)  |
| Florida          | 1978        | 1.0<br>(0.99–1.01)  |
| Florida          | 1979        | 1.0<br>(0.99–1.01)  |
| Florida          | 1980        | 1.0<br>(0.99–1.01)  |
| Florida          | 1981        | 1.0<br>(0.98–1.01)  |
| Florida          | 1982        | 1.0<br>(0.99–1.01)  |
| Florida          | 1983        | 1.0<br>(0.98–1.01)  |
| Florida          | 1984        | 1.0<br>(0.98–1.01)  |
| Florida          | 1985        | 1.0<br>(0.99–1.02)  |
| Florida          | 1986        | 1.0<br>(0.99–1.01)  |
| Florida          | 1987        | 1.0<br>(0.99–1.01)  |
| Florida          | 1988        | 1.0<br>(0.99–1.02)  |
| Florida          | 1989        | 1.01<br>(0.99–1.02) |
| Florida          | 1990        | 1.0<br>(0.98–1.01)  |
| Florida          | 1991        | 1.0<br>(0.99–1.01)  |
| Florida          | 1992        | 0.99<br>(0.98–1.01) |
| Florida          | 1993        | 1.0<br>(0.99–1.02)  |
| Florida          | 1994        | 1.0<br>(0.99–1.02)  |
| Florida          | 1995        | 0.99<br>(0.98–1.01) |
| Florida          | 1996        | 1.0<br>(0.98–1.01)  |
| Florida          | 1997        | 1.0<br>(0.98–1.02)  |
| Florida          | 1998        | 1.01<br>(0.99–1.02) |
| Florida          | 1999        | 1.0<br>(0.99–1.01)  |
| Florida          | 2000        | 1.0<br>(0.99–1.01)  |
| Florida          | 2001        | 0.99<br>(0.98–1.01) |
| Florida          | 2002        | 1.0<br>(0.98–1.02)  |
| Florida          | 2003        | 1.0<br>(0.98–1.02)  |
| Florida          | 2004        | 1.0<br>(0.98–1.01)  |

**Table 15 Ratio of adjusted to unadjusted 5q0 values for scaled locations by year**

| <b>Geography</b> | <b>Year</b> | <b>Ratio</b>        |
|------------------|-------------|---------------------|
| Florida          | 2005        | 1.0<br>(0.99–1.01)  |
| Florida          | 2006        | 1.0<br>(0.98–1.02)  |
| Florida          | 2007        | 1.01<br>(0.99–1.02) |
| Florida          | 2008        | 1.0<br>(0.99–1.02)  |
| Florida          | 2009        | 1.0<br>(0.98–1.01)  |
| Florida          | 2010        | 0.99<br>(0.97–1.01) |
| Florida          | 2011        | 1.0<br>(0.98–1.02)  |
| Florida          | 2012        | 1.0<br>(0.98–1.02)  |
| Florida          | 2013        | 1.0<br>(0.98–1.02)  |
| Florida          | 2014        | 1.0<br>(0.98–1.02)  |
| Florida          | 2015        | 1.0<br>(0.98–1.03)  |
| Florida          | 2016        | 1.03<br>(0.93–1.13) |
| Florida          | 2017        | 1.02<br>(0.87–1.18) |
| Georgia          | 1950        | 0.81<br>(0.67–0.97) |
| Georgia          | 1951        | 0.86<br>(0.71–1.01) |
| Georgia          | 1952        | 0.87<br>(0.74–1.02) |
| Georgia          | 1953        | 0.87<br>(0.73–1.02) |
| Georgia          | 1954        | 0.86<br>(0.72–1.0)  |
| Georgia          | 1955        | 0.87<br>(0.73–1.01) |
| Georgia          | 1956        | 0.89<br>(0.77–1.02) |
| Georgia          | 1957        | 0.93<br>(0.83–1.03) |
| Georgia          | 1958        | 0.96<br>(0.91–1.02) |
| Georgia          | 1959        | 1.0<br>(0.99–1.01)  |
| Georgia          | 1960        | 1.0<br>(0.99–1.01)  |
| Georgia          | 1961        | 1.0<br>(0.99–1.01)  |
| Georgia          | 1962        | 1.0<br>(0.99–1.01)  |
| Georgia          | 1963        | 1.01<br>(0.99–1.02) |
| Georgia          | 1964        | 1.0<br>(0.99–1.01)  |
| Georgia          | 1965        | 1.0<br>(0.98–1.02)  |
| Georgia          | 1966        | 1.0<br>(0.98–1.02)  |
| Georgia          | 1967        | 1.0<br>(0.98–1.01)  |

**Table 15 Ratio of adjusted to unadjusted 5q0 values for scaled locations by year**

| <b>Geography</b> | <b>Year</b> | <b>Ratio</b>        |
|------------------|-------------|---------------------|
| Georgia          | 1968        | 1.0<br>(0.98–1.01)  |
| Georgia          | 1969        | 1.0<br>(0.99–1.02)  |
| Georgia          | 1970        | 1.01<br>(0.99–1.02) |
| Georgia          | 1971        | 1.0<br>(0.98–1.01)  |
| Georgia          | 1972        | 1.0<br>(0.99–1.01)  |
| Georgia          | 1973        | 1.0<br>(0.99–1.02)  |
| Georgia          | 1974        | 1.0<br>(0.99–1.02)  |
| Georgia          | 1975        | 1.0<br>(0.98–1.01)  |
| Georgia          | 1976        | 1.0<br>(0.99–1.02)  |
| Georgia          | 1977        | 1.0<br>(0.98–1.01)  |
| Georgia          | 1978        | 1.0<br>(0.99–1.01)  |
| Georgia          | 1979        | 1.0<br>(0.99–1.01)  |
| Georgia          | 1980        | 1.0<br>(0.99–1.01)  |
| Georgia          | 1981        | 1.0<br>(0.98–1.01)  |
| Georgia          | 1982        | 1.0<br>(0.99–1.01)  |
| Georgia          | 1983        | 1.0<br>(0.98–1.01)  |
| Georgia          | 1984        | 1.0<br>(0.98–1.01)  |
| Georgia          | 1985        | 1.0<br>(0.99–1.02)  |
| Georgia          | 1986        | 1.0<br>(0.99–1.01)  |
| Georgia          | 1987        | 1.0<br>(0.99–1.01)  |
| Georgia          | 1988        | 1.0<br>(0.99–1.02)  |
| Georgia          | 1989        | 1.01<br>(0.99–1.02) |
| Georgia          | 1990        | 1.0<br>(0.98–1.01)  |
| Georgia          | 1991        | 1.0<br>(0.99–1.01)  |
| Georgia          | 1992        | 0.99<br>(0.98–1.01) |
| Georgia          | 1993        | 1.0<br>(0.99–1.02)  |
| Georgia          | 1994        | 1.0<br>(0.99–1.02)  |
| Georgia          | 1995        | 0.99<br>(0.98–1.01) |
| Georgia          | 1996        | 1.0<br>(0.98–1.01)  |
| Georgia          | 1997        | 1.0<br>(0.98–1.02)  |
| Georgia          | 1998        | 1.01<br>(0.99–1.02) |

**Table 15 Ratio of adjusted to unadjusted 5q0 values for scaled locations by year**

| <b>Geography</b> | <b>Year</b> | <b>Ratio</b>        |
|------------------|-------------|---------------------|
| Georgia          | 1999        | 1.0<br>(0.99–1.01)  |
| Georgia          | 2000        | 1.0<br>(0.99–1.01)  |
| Georgia          | 2001        | 0.99<br>(0.98–1.01) |
| Georgia          | 2002        | 1.0<br>(0.98–1.02)  |
| Georgia          | 2003        | 1.0<br>(0.98–1.02)  |
| Georgia          | 2004        | 1.0<br>(0.98–1.01)  |
| Georgia          | 2005        | 1.0<br>(0.99–1.01)  |
| Georgia          | 2006        | 1.0<br>(0.98–1.02)  |
| Georgia          | 2007        | 1.01<br>(0.99–1.02) |
| Georgia          | 2008        | 1.0<br>(0.99–1.02)  |
| Georgia          | 2009        | 1.0<br>(0.98–1.01)  |
| Georgia          | 2010        | 0.99<br>(0.97–1.01) |
| Georgia          | 2011        | 1.0<br>(0.98–1.02)  |
| Georgia          | 2012        | 1.0<br>(0.98–1.02)  |
| Georgia          | 2013        | 1.0<br>(0.98–1.02)  |
| Georgia          | 2014        | 1.0<br>(0.98–1.02)  |
| Georgia          | 2015        | 1.0<br>(0.98–1.03)  |
| Georgia          | 2016        | 1.03<br>(0.93–1.13) |
| Georgia          | 2017        | 1.02<br>(0.87–1.18) |
| Hawaii           | 1950        | 0.81<br>(0.67–0.97) |
| Hawaii           | 1951        | 0.86<br>(0.71–1.01) |
| Hawaii           | 1952        | 0.87<br>(0.74–1.02) |
| Hawaii           | 1953        | 0.87<br>(0.73–1.02) |
| Hawaii           | 1954        | 0.85<br>(0.71–1.0)  |
| Hawaii           | 1955        | 0.87<br>(0.73–1.01) |
| Hawaii           | 1956        | 0.89<br>(0.77–1.02) |
| Hawaii           | 1957        | 0.93<br>(0.83–1.03) |
| Hawaii           | 1958        | 0.96<br>(0.9–1.02)  |
| Hawaii           | 1959        | 1.0<br>(0.99–1.01)  |
| Hawaii           | 1960        | 1.0<br>(0.99–1.01)  |
| Hawaii           | 1961        | 1.0<br>(0.99–1.01)  |

**Table 15 Ratio of adjusted to unadjusted 5q0 values for scaled locations by year**

| <b>Geography</b> | <b>Year</b> | <b>Ratio</b>        |
|------------------|-------------|---------------------|
| Hawaii           | 1962        | 1.0<br>(0.99–1.01)  |
| Hawaii           | 1963        | 1.01<br>(0.99–1.02) |
| Hawaii           | 1964        | 1.0<br>(0.99–1.01)  |
| Hawaii           | 1965        | 1.0<br>(0.98–1.02)  |
| Hawaii           | 1966        | 1.0<br>(0.98–1.02)  |
| Hawaii           | 1967        | 1.0<br>(0.98–1.01)  |
| Hawaii           | 1968        | 1.0<br>(0.98–1.01)  |
| Hawaii           | 1969        | 1.0<br>(0.99–1.02)  |
| Hawaii           | 1970        | 1.01<br>(0.99–1.02) |
| Hawaii           | 1971        | 1.0<br>(0.98–1.01)  |
| Hawaii           | 1972        | 1.0<br>(0.99–1.01)  |
| Hawaii           | 1973        | 1.0<br>(0.99–1.02)  |
| Hawaii           | 1974        | 1.0<br>(0.99–1.02)  |
| Hawaii           | 1975        | 1.0<br>(0.98–1.01)  |
| Hawaii           | 1976        | 1.0<br>(0.99–1.02)  |
| Hawaii           | 1977        | 1.0<br>(0.98–1.01)  |
| Hawaii           | 1978        | 1.0<br>(0.99–1.01)  |
| Hawaii           | 1979        | 1.0<br>(0.99–1.01)  |
| Hawaii           | 1980        | 1.0<br>(0.99–1.01)  |
| Hawaii           | 1981        | 1.0<br>(0.98–1.01)  |
| Hawaii           | 1982        | 1.0<br>(0.99–1.01)  |
| Hawaii           | 1983        | 1.0<br>(0.98–1.01)  |
| Hawaii           | 1984        | 1.0<br>(0.98–1.01)  |
| Hawaii           | 1985        | 1.0<br>(0.99–1.02)  |
| Hawaii           | 1986        | 1.0<br>(0.99–1.01)  |
| Hawaii           | 1987        | 1.0<br>(0.99–1.01)  |
| Hawaii           | 1988        | 1.0<br>(0.99–1.02)  |
| Hawaii           | 1989        | 1.01<br>(0.99–1.02) |
| Hawaii           | 1990        | 1.0<br>(0.98–1.01)  |
| Hawaii           | 1991        | 1.0<br>(0.99–1.01)  |
| Hawaii           | 1992        | 0.99<br>(0.98–1.01) |

**Table 15 Ratio of adjusted to unadjusted 5q0 values for scaled locations by year**

| <b>Geography</b> | <b>Year</b> | <b>Ratio</b>        |
|------------------|-------------|---------------------|
| Hawaii           | 1993        | 1.0<br>(0.99–1.02)  |
| Hawaii           | 1994        | 1.0<br>(0.99–1.02)  |
| Hawaii           | 1995        | 0.99<br>(0.98–1.01) |
| Hawaii           | 1996        | 1.0<br>(0.98–1.01)  |
| Hawaii           | 1997        | 1.0<br>(0.98–1.02)  |
| Hawaii           | 1998        | 1.01<br>(0.99–1.02) |
| Hawaii           | 1999        | 1.0<br>(0.99–1.01)  |
| Hawaii           | 2000        | 1.0<br>(0.99–1.01)  |
| Hawaii           | 2001        | 0.99<br>(0.98–1.01) |
| Hawaii           | 2002        | 1.0<br>(0.98–1.02)  |
| Hawaii           | 2003        | 1.0<br>(0.98–1.02)  |
| Hawaii           | 2004        | 1.0<br>(0.98–1.01)  |
| Hawaii           | 2005        | 1.0<br>(0.99–1.01)  |
| Hawaii           | 2006        | 1.0<br>(0.98–1.02)  |
| Hawaii           | 2007        | 1.01<br>(0.99–1.02) |
| Hawaii           | 2008        | 1.0<br>(0.99–1.02)  |
| Hawaii           | 2009        | 1.0<br>(0.98–1.01)  |
| Hawaii           | 2010        | 0.99<br>(0.97–1.01) |
| Hawaii           | 2011        | 1.0<br>(0.98–1.02)  |
| Hawaii           | 2012        | 1.0<br>(0.98–1.02)  |
| Hawaii           | 2013        | 1.0<br>(0.98–1.02)  |
| Hawaii           | 2014        | 1.0<br>(0.98–1.02)  |
| Hawaii           | 2015        | 1.0<br>(0.98–1.03)  |
| Hawaii           | 2016        | 1.03<br>(0.93–1.13) |
| Hawaii           | 2017        | 1.02<br>(0.87–1.18) |
| Idaho            | 1950        | 0.81<br>(0.67–0.97) |
| Idaho            | 1951        | 0.86<br>(0.71–1.01) |
| Idaho            | 1952        | 0.87<br>(0.74–1.02) |
| Idaho            | 1953        | 0.87<br>(0.73–1.02) |
| Idaho            | 1954        | 0.85<br>(0.71–1.0)  |
| Idaho            | 1955        | 0.87<br>(0.73–1.01) |



**Table 15 Ratio of adjusted to unadjusted 5q0 values for scaled locations by year**

| <b>Geography</b> | <b>Year</b> | <b>Ratio</b>        |
|------------------|-------------|---------------------|
| Idaho            | 1956        | 0.89<br>(0.77–1.02) |
| Idaho            | 1957        | 0.93<br>(0.83–1.03) |
| Idaho            | 1958        | 0.96<br>(0.9–1.02)  |
| Idaho            | 1959        | 1.0<br>(0.99–1.01)  |
| Idaho            | 1960        | 1.0<br>(0.99–1.01)  |
| Idaho            | 1961        | 1.0<br>(0.99–1.01)  |
| Idaho            | 1962        | 1.0<br>(0.99–1.01)  |
| Idaho            | 1963        | 1.01<br>(0.99–1.02) |
| Idaho            | 1964        | 1.0<br>(0.99–1.01)  |
| Idaho            | 1965        | 1.0<br>(0.98–1.02)  |
| Idaho            | 1966        | 1.0<br>(0.98–1.02)  |
| Idaho            | 1967        | 1.0<br>(0.98–1.01)  |
| Idaho            | 1968        | 1.0<br>(0.98–1.01)  |
| Idaho            | 1969        | 1.0<br>(0.99–1.02)  |
| Idaho            | 1970        | 1.01<br>(0.99–1.02) |
| Idaho            | 1971        | 1.0<br>(0.98–1.01)  |
| Idaho            | 1972        | 1.0<br>(0.99–1.01)  |
| Idaho            | 1973        | 1.0<br>(0.99–1.02)  |
| Idaho            | 1974        | 1.0<br>(0.99–1.02)  |
| Idaho            | 1975        | 1.0<br>(0.98–1.01)  |
| Idaho            | 1976        | 1.0<br>(0.99–1.02)  |
| Idaho            | 1977        | 1.0<br>(0.98–1.01)  |
| Idaho            | 1978        | 1.0<br>(0.99–1.01)  |
| Idaho            | 1979        | 1.0<br>(0.99–1.01)  |
| Idaho            | 1980        | 1.0<br>(0.99–1.01)  |
| Idaho            | 1981        | 1.0<br>(0.98–1.01)  |
| Idaho            | 1982        | 1.0<br>(0.99–1.01)  |
| Idaho            | 1983        | 1.0<br>(0.98–1.01)  |
| Idaho            | 1984        | 1.0<br>(0.98–1.01)  |
| Idaho            | 1985        | 1.0<br>(0.99–1.02)  |
| Idaho            | 1986        | 1.0<br>(0.99–1.01)  |

**Table 15 Ratio of adjusted to unadjusted 5q0 values for scaled locations by year**

| <b>Geography</b> | <b>Year</b> | <b>Ratio</b>        |
|------------------|-------------|---------------------|
| Idaho            | 1987        | 1.0<br>(0.99–1.01)  |
| Idaho            | 1988        | 1.0<br>(0.99–1.02)  |
| Idaho            | 1989        | 1.01<br>(0.99–1.02) |
| Idaho            | 1990        | 1.0<br>(0.98–1.01)  |
| Idaho            | 1991        | 1.0<br>(0.99–1.01)  |
| Idaho            | 1992        | 0.99<br>(0.98–1.01) |
| Idaho            | 1993        | 1.0<br>(0.99–1.02)  |
| Idaho            | 1994        | 1.0<br>(0.99–1.02)  |
| Idaho            | 1995        | 0.99<br>(0.98–1.01) |
| Idaho            | 1996        | 1.0<br>(0.98–1.01)  |
| Idaho            | 1997        | 1.0<br>(0.98–1.02)  |
| Idaho            | 1998        | 1.01<br>(0.99–1.02) |
| Idaho            | 1999        | 1.0<br>(0.99–1.01)  |
| Idaho            | 2000        | 1.0<br>(0.99–1.01)  |
| Idaho            | 2001        | 0.99<br>(0.98–1.01) |
| Idaho            | 2002        | 1.0<br>(0.98–1.02)  |
| Idaho            | 2003        | 1.0<br>(0.98–1.02)  |
| Idaho            | 2004        | 1.0<br>(0.98–1.01)  |
| Idaho            | 2005        | 1.0<br>(0.99–1.01)  |
| Idaho            | 2006        | 1.0<br>(0.98–1.02)  |
| Idaho            | 2007        | 1.01<br>(0.99–1.02) |
| Idaho            | 2008        | 1.0<br>(0.99–1.02)  |
| Idaho            | 2009        | 1.0<br>(0.98–1.01)  |
| Idaho            | 2010        | 0.99<br>(0.97–1.01) |
| Idaho            | 2011        | 1.0<br>(0.98–1.02)  |
| Idaho            | 2012        | 1.0<br>(0.98–1.02)  |
| Idaho            | 2013        | 1.0<br>(0.98–1.02)  |
| Idaho            | 2014        | 1.0<br>(0.98–1.02)  |
| Idaho            | 2015        | 1.0<br>(0.98–1.03)  |
| Idaho            | 2016        | 1.03<br>(0.93–1.13) |
| Idaho            | 2017        | 1.02<br>(0.87–1.18) |

**Table 15 Ratio of adjusted to unadjusted 5q0 values for scaled locations by year**

| <b>Geography</b> | <b>Year</b> | <b>Ratio</b>        |
|------------------|-------------|---------------------|
| Illinois         | 1950        | 0.81<br>(0.67–0.97) |
| Illinois         | 1951        | 0.86<br>(0.71–1.01) |
| Illinois         | 1952        | 0.87<br>(0.74–1.02) |
| Illinois         | 1953        | 0.87<br>(0.73–1.02) |
| Illinois         | 1954        | 0.85<br>(0.71–1.0)  |
| Illinois         | 1955        | 0.87<br>(0.73–1.01) |
| Illinois         | 1956        | 0.89<br>(0.77–1.02) |
| Illinois         | 1957        | 0.93<br>(0.83–1.03) |
| Illinois         | 1958        | 0.96<br>(0.9–1.02)  |
| Illinois         | 1959        | 1.0<br>(0.99–1.01)  |
| Illinois         | 1960        | 1.0<br>(0.99–1.01)  |
| Illinois         | 1961        | 1.0<br>(0.99–1.01)  |
| Illinois         | 1962        | 1.0<br>(0.99–1.01)  |
| Illinois         | 1963        | 1.01<br>(0.99–1.02) |
| Illinois         | 1964        | 1.0<br>(0.99–1.01)  |
| Illinois         | 1965        | 1.0<br>(0.98–1.02)  |
| Illinois         | 1966        | 1.0<br>(0.98–1.02)  |
| Illinois         | 1967        | 1.0<br>(0.98–1.01)  |
| Illinois         | 1968        | 1.0<br>(0.98–1.01)  |
| Illinois         | 1969        | 1.0<br>(0.99–1.02)  |
| Illinois         | 1970        | 1.01<br>(0.99–1.02) |
| Illinois         | 1971        | 1.0<br>(0.98–1.01)  |
| Illinois         | 1972        | 1.0<br>(0.99–1.01)  |
| Illinois         | 1973        | 1.0<br>(0.99–1.02)  |
| Illinois         | 1974        | 1.0<br>(0.99–1.02)  |
| Illinois         | 1975        | 1.0<br>(0.98–1.01)  |
| Illinois         | 1976        | 1.0<br>(0.99–1.02)  |
| Illinois         | 1977        | 1.0<br>(0.98–1.01)  |
| Illinois         | 1978        | 1.0<br>(0.99–1.01)  |
| Illinois         | 1979        | 1.0<br>(0.99–1.01)  |
| Illinois         | 1980        | 1.0<br>(0.99–1.01)  |

**Table 15 Ratio of adjusted to unadjusted 5q0 values for scaled locations by year**

| <b>Geography</b> | <b>Year</b> | <b>Ratio</b>        |
|------------------|-------------|---------------------|
| Illinois         | 1981        | 1.0<br>(0.98–1.01)  |
| Illinois         | 1982        | 1.0<br>(0.99–1.01)  |
| Illinois         | 1983        | 1.0<br>(0.98–1.01)  |
| Illinois         | 1984        | 1.0<br>(0.98–1.01)  |
| Illinois         | 1985        | 1.0<br>(0.99–1.02)  |
| Illinois         | 1986        | 1.0<br>(0.99–1.01)  |
| Illinois         | 1987        | 1.0<br>(0.99–1.01)  |
| Illinois         | 1988        | 1.0<br>(0.99–1.02)  |
| Illinois         | 1989        | 1.01<br>(0.99–1.02) |
| Illinois         | 1990        | 1.0<br>(0.98–1.01)  |
| Illinois         | 1991        | 1.0<br>(0.99–1.01)  |
| Illinois         | 1992        | 0.99<br>(0.98–1.01) |
| Illinois         | 1993        | 1.0<br>(0.99–1.02)  |
| Illinois         | 1994        | 1.0<br>(0.99–1.02)  |
| Illinois         | 1995        | 0.99<br>(0.98–1.01) |
| Illinois         | 1996        | 1.0<br>(0.98–1.01)  |
| Illinois         | 1997        | 1.0<br>(0.98–1.02)  |
| Illinois         | 1998        | 1.01<br>(0.99–1.02) |
| Illinois         | 1999        | 1.0<br>(0.99–1.01)  |
| Illinois         | 2000        | 1.0<br>(0.99–1.01)  |
| Illinois         | 2001        | 0.99<br>(0.98–1.01) |
| Illinois         | 2002        | 1.0<br>(0.98–1.02)  |
| Illinois         | 2003        | 1.0<br>(0.98–1.02)  |
| Illinois         | 2004        | 1.0<br>(0.98–1.01)  |
| Illinois         | 2005        | 1.0<br>(0.99–1.01)  |
| Illinois         | 2006        | 1.0<br>(0.98–1.02)  |
| Illinois         | 2007        | 1.01<br>(0.99–1.02) |
| Illinois         | 2008        | 1.0<br>(0.99–1.02)  |
| Illinois         | 2009        | 1.0<br>(0.98–1.01)  |
| Illinois         | 2010        | 0.99<br>(0.97–1.01) |
| Illinois         | 2011        | 1.0<br>(0.98–1.02)  |

**Table 15 Ratio of adjusted to unadjusted 5q0 values for scaled locations by year**

| <b>Geography</b> | <b>Year</b> | <b>Ratio</b>        |
|------------------|-------------|---------------------|
| Illinois         | 2012        | 1.0<br>(0.98–1.02)  |
| Illinois         | 2013        | 1.0<br>(0.98–1.02)  |
| Illinois         | 2014        | 1.0<br>(0.98–1.02)  |
| Illinois         | 2015        | 1.0<br>(0.98–1.03)  |
| Illinois         | 2016        | 1.03<br>(0.93–1.13) |
| Illinois         | 2017        | 1.02<br>(0.87–1.18) |
| Indiana          | 1950        | 0.81<br>(0.67–0.97) |
| Indiana          | 1951        | 0.86<br>(0.71–1.01) |
| Indiana          | 1952        | 0.87<br>(0.74–1.02) |
| Indiana          | 1953        | 0.87<br>(0.73–1.02) |
| Indiana          | 1954        | 0.85<br>(0.71–1.0)  |
| Indiana          | 1955        | 0.87<br>(0.73–1.01) |
| Indiana          | 1956        | 0.89<br>(0.77–1.02) |
| Indiana          | 1957        | 0.93<br>(0.83–1.03) |
| Indiana          | 1958        | 0.96<br>(0.9–1.02)  |
| Indiana          | 1959        | 1.0<br>(0.99–1.01)  |
| Indiana          | 1960        | 1.0<br>(0.99–1.01)  |
| Indiana          | 1961        | 1.0<br>(0.99–1.01)  |
| Indiana          | 1962        | 1.0<br>(0.99–1.01)  |
| Indiana          | 1963        | 1.01<br>(0.99–1.02) |
| Indiana          | 1964        | 1.0<br>(0.99–1.01)  |
| Indiana          | 1965        | 1.0<br>(0.98–1.02)  |
| Indiana          | 1966        | 1.0<br>(0.98–1.02)  |
| Indiana          | 1967        | 1.0<br>(0.98–1.01)  |
| Indiana          | 1968        | 1.0<br>(0.98–1.01)  |
| Indiana          | 1969        | 1.0<br>(0.99–1.02)  |
| Indiana          | 1970        | 1.01<br>(0.99–1.02) |
| Indiana          | 1971        | 1.0<br>(0.98–1.01)  |
| Indiana          | 1972        | 1.0<br>(0.99–1.01)  |
| Indiana          | 1973        | 1.0<br>(0.99–1.02)  |
| Indiana          | 1974        | 1.0<br>(0.99–1.02)  |

**Table 15 Ratio of adjusted to unadjusted 5q0 values for scaled locations by year**

| <b>Geography</b> | <b>Year</b> | <b>Ratio</b>        |
|------------------|-------------|---------------------|
| Indiana          | 1975        | 1.0<br>(0.98–1.01)  |
| Indiana          | 1976        | 1.0<br>(0.99–1.02)  |
| Indiana          | 1977        | 1.0<br>(0.98–1.01)  |
| Indiana          | 1978        | 1.0<br>(0.99–1.01)  |
| Indiana          | 1979        | 1.0<br>(0.99–1.01)  |
| Indiana          | 1980        | 1.0<br>(0.99–1.01)  |
| Indiana          | 1981        | 1.0<br>(0.98–1.01)  |
| Indiana          | 1982        | 1.0<br>(0.99–1.01)  |
| Indiana          | 1983        | 1.0<br>(0.98–1.01)  |
| Indiana          | 1984        | 1.0<br>(0.98–1.01)  |
| Indiana          | 1985        | 1.0<br>(0.99–1.02)  |
| Indiana          | 1986        | 1.0<br>(0.99–1.01)  |
| Indiana          | 1987        | 1.0<br>(0.99–1.01)  |
| Indiana          | 1988        | 1.0<br>(0.99–1.02)  |
| Indiana          | 1989        | 1.01<br>(0.99–1.02) |
| Indiana          | 1990        | 1.0<br>(0.98–1.01)  |
| Indiana          | 1991        | 1.0<br>(0.99–1.01)  |
| Indiana          | 1992        | 0.99<br>(0.98–1.01) |
| Indiana          | 1993        | 1.0<br>(0.99–1.02)  |
| Indiana          | 1994        | 1.0<br>(0.99–1.02)  |
| Indiana          | 1995        | 0.99<br>(0.98–1.01) |
| Indiana          | 1996        | 1.0<br>(0.98–1.01)  |
| Indiana          | 1997        | 1.0<br>(0.98–1.02)  |
| Indiana          | 1998        | 1.01<br>(0.99–1.02) |
| Indiana          | 1999        | 1.0<br>(0.99–1.01)  |
| Indiana          | 2000        | 1.0<br>(0.99–1.01)  |
| Indiana          | 2001        | 0.99<br>(0.98–1.01) |
| Indiana          | 2002        | 1.0<br>(0.98–1.02)  |
| Indiana          | 2003        | 1.0<br>(0.98–1.02)  |
| Indiana          | 2004        | 1.0<br>(0.98–1.01)  |
| Indiana          | 2005        | 1.0<br>(0.99–1.01)  |

**Table 15 Ratio of adjusted to unadjusted 5q0 values for scaled locations by year**

| <b>Geography</b> | <b>Year</b> | <b>Ratio</b>        |
|------------------|-------------|---------------------|
| Indiana          | 2006        | 1.0<br>(0.98–1.02)  |
| Indiana          | 2007        | 1.01<br>(0.99–1.02) |
| Indiana          | 2008        | 1.0<br>(0.99–1.02)  |
| Indiana          | 2009        | 1.0<br>(0.98–1.01)  |
| Indiana          | 2010        | 0.99<br>(0.97–1.01) |
| Indiana          | 2011        | 1.0<br>(0.98–1.02)  |
| Indiana          | 2012        | 1.0<br>(0.98–1.02)  |
| Indiana          | 2013        | 1.0<br>(0.98–1.02)  |
| Indiana          | 2014        | 1.0<br>(0.98–1.02)  |
| Indiana          | 2015        | 1.0<br>(0.98–1.03)  |
| Indiana          | 2016        | 1.03<br>(0.93–1.13) |
| Indiana          | 2017        | 1.02<br>(0.87–1.18) |
| Iowa             | 1950        | 0.81<br>(0.67–0.97) |
| Iowa             | 1951        | 0.85<br>(0.71–1.01) |
| Iowa             | 1952        | 0.87<br>(0.73–1.02) |
| Iowa             | 1953        | 0.87<br>(0.73–1.02) |
| Iowa             | 1954        | 0.85<br>(0.71–1.0)  |
| Iowa             | 1955        | 0.87<br>(0.73–1.01) |
| Iowa             | 1956        | 0.89<br>(0.77–1.02) |
| Iowa             | 1957        | 0.92<br>(0.83–1.03) |
| Iowa             | 1958        | 0.96<br>(0.9–1.02)  |
| Iowa             | 1959        | 1.0<br>(0.99–1.01)  |
| Iowa             | 1960        | 1.0<br>(0.99–1.01)  |
| Iowa             | 1961        | 1.0<br>(0.99–1.01)  |
| Iowa             | 1962        | 1.0<br>(0.99–1.01)  |
| Iowa             | 1963        | 1.01<br>(0.99–1.02) |
| Iowa             | 1964        | 1.0<br>(0.99–1.01)  |
| Iowa             | 1965        | 1.0<br>(0.98–1.02)  |
| Iowa             | 1966        | 1.0<br>(0.98–1.02)  |
| Iowa             | 1967        | 1.0<br>(0.98–1.01)  |
| Iowa             | 1968        | 1.0<br>(0.98–1.01)  |

**Table 15 Ratio of adjusted to unadjusted 5q0 values for scaled locations by year**

| <b>Geography</b> | <b>Year</b> | <b>Ratio</b>        |
|------------------|-------------|---------------------|
| Iowa             | 1969        | 1.0<br>(0.99–1.02)  |
| Iowa             | 1970        | 1.01<br>(0.99–1.02) |
| Iowa             | 1971        | 1.0<br>(0.98–1.01)  |
| Iowa             | 1972        | 1.0<br>(0.99–1.01)  |
| Iowa             | 1973        | 1.0<br>(0.99–1.02)  |
| Iowa             | 1974        | 1.0<br>(0.99–1.02)  |
| Iowa             | 1975        | 1.0<br>(0.98–1.01)  |
| Iowa             | 1976        | 1.0<br>(0.99–1.02)  |
| Iowa             | 1977        | 1.0<br>(0.98–1.01)  |
| Iowa             | 1978        | 1.0<br>(0.99–1.01)  |
| Iowa             | 1979        | 1.0<br>(0.99–1.01)  |
| Iowa             | 1980        | 1.0<br>(0.99–1.01)  |
| Iowa             | 1981        | 1.0<br>(0.98–1.01)  |
| Iowa             | 1982        | 1.0<br>(0.99–1.01)  |
| Iowa             | 1983        | 1.0<br>(0.98–1.01)  |
| Iowa             | 1984        | 1.0<br>(0.98–1.01)  |
| Iowa             | 1985        | 1.0<br>(0.99–1.02)  |
| Iowa             | 1986        | 1.0<br>(0.99–1.01)  |
| Iowa             | 1987        | 1.0<br>(0.99–1.01)  |
| Iowa             | 1988        | 1.0<br>(0.99–1.02)  |
| Iowa             | 1989        | 1.01<br>(0.99–1.02) |
| Iowa             | 1990        | 1.0<br>(0.98–1.01)  |
| Iowa             | 1991        | 1.0<br>(0.99–1.01)  |
| Iowa             | 1992        | 0.99<br>(0.98–1.01) |
| Iowa             | 1993        | 1.0<br>(0.99–1.02)  |
| Iowa             | 1994        | 1.0<br>(0.99–1.02)  |
| Iowa             | 1995        | 0.99<br>(0.98–1.01) |
| Iowa             | 1996        | 1.0<br>(0.98–1.01)  |
| Iowa             | 1997        | 1.0<br>(0.98–1.02)  |
| Iowa             | 1998        | 1.01<br>(0.99–1.02) |
| Iowa             | 1999        | 1.0<br>(0.99–1.01)  |



**Table 15 Ratio of adjusted to unadjusted 5q0 values for scaled locations by year**

| <b>Geography</b> | <b>Year</b> | <b>Ratio</b>        |
|------------------|-------------|---------------------|
| Iowa             | 2000        | 1.0<br>(0.99–1.01)  |
| Iowa             | 2001        | 0.99<br>(0.98–1.01) |
| Iowa             | 2002        | 1.0<br>(0.98–1.02)  |
| Iowa             | 2003        | 1.0<br>(0.98–1.02)  |
| Iowa             | 2004        | 1.0<br>(0.98–1.01)  |
| Iowa             | 2005        | 1.0<br>(0.99–1.01)  |
| Iowa             | 2006        | 1.0<br>(0.98–1.02)  |
| Iowa             | 2007        | 1.01<br>(0.99–1.02) |
| Iowa             | 2008        | 1.0<br>(0.99–1.02)  |
| Iowa             | 2009        | 1.0<br>(0.98–1.01)  |
| Iowa             | 2010        | 0.99<br>(0.97–1.01) |
| Iowa             | 2011        | 1.0<br>(0.98–1.02)  |
| Iowa             | 2012        | 1.0<br>(0.98–1.02)  |
| Iowa             | 2013        | 1.0<br>(0.98–1.02)  |
| Iowa             | 2014        | 1.0<br>(0.98–1.02)  |
| Iowa             | 2015        | 1.0<br>(0.98–1.03)  |
| Iowa             | 2016        | 1.03<br>(0.93–1.13) |
| Iowa             | 2017        | 1.02<br>(0.87–1.18) |
| Kansas           | 1950        | 0.81<br>(0.67–0.97) |
| Kansas           | 1951        | 0.85<br>(0.71–1.01) |
| Kansas           | 1952        | 0.87<br>(0.73–1.02) |
| Kansas           | 1953        | 0.87<br>(0.73–1.02) |
| Kansas           | 1954        | 0.85<br>(0.71–1.0)  |
| Kansas           | 1955        | 0.87<br>(0.73–1.01) |
| Kansas           | 1956        | 0.89<br>(0.77–1.02) |
| Kansas           | 1957        | 0.93<br>(0.83–1.03) |
| Kansas           | 1958        | 0.96<br>(0.9–1.02)  |
| Kansas           | 1959        | 1.0<br>(0.99–1.01)  |
| Kansas           | 1960        | 1.0<br>(0.99–1.01)  |
| Kansas           | 1961        | 1.0<br>(0.99–1.01)  |
| Kansas           | 1962        | 1.0<br>(0.99–1.01)  |

**Table 15 Ratio of adjusted to unadjusted 5q0 values for scaled locations by year**

| <b>Geography</b> | <b>Year</b> | <b>Ratio</b>        |
|------------------|-------------|---------------------|
| Kansas           | 1963        | 1.01<br>(0.99–1.02) |
| Kansas           | 1964        | 1.0<br>(0.99–1.01)  |
| Kansas           | 1965        | 1.0<br>(0.98–1.02)  |
| Kansas           | 1966        | 1.0<br>(0.98–1.02)  |
| Kansas           | 1967        | 1.0<br>(0.98–1.01)  |
| Kansas           | 1968        | 1.0<br>(0.98–1.01)  |
| Kansas           | 1969        | 1.0<br>(0.99–1.02)  |
| Kansas           | 1970        | 1.01<br>(0.99–1.02) |
| Kansas           | 1971        | 1.0<br>(0.98–1.01)  |
| Kansas           | 1972        | 1.0<br>(0.99–1.01)  |
| Kansas           | 1973        | 1.0<br>(0.99–1.02)  |
| Kansas           | 1974        | 1.0<br>(0.99–1.02)  |
| Kansas           | 1975        | 1.0<br>(0.98–1.01)  |
| Kansas           | 1976        | 1.0<br>(0.99–1.02)  |
| Kansas           | 1977        | 1.0<br>(0.98–1.01)  |
| Kansas           | 1978        | 1.0<br>(0.99–1.01)  |
| Kansas           | 1979        | 1.0<br>(0.99–1.01)  |
| Kansas           | 1980        | 1.0<br>(0.99–1.01)  |
| Kansas           | 1981        | 1.0<br>(0.98–1.01)  |
| Kansas           | 1982        | 1.0<br>(0.99–1.01)  |
| Kansas           | 1983        | 1.0<br>(0.98–1.01)  |
| Kansas           | 1984        | 1.0<br>(0.98–1.01)  |
| Kansas           | 1985        | 1.0<br>(0.99–1.02)  |
| Kansas           | 1986        | 1.0<br>(0.99–1.01)  |
| Kansas           | 1987        | 1.0<br>(0.99–1.01)  |
| Kansas           | 1988        | 1.0<br>(0.99–1.02)  |
| Kansas           | 1989        | 1.01<br>(0.99–1.02) |
| Kansas           | 1990        | 1.0<br>(0.98–1.01)  |
| Kansas           | 1991        | 1.0<br>(0.99–1.01)  |
| Kansas           | 1992        | 0.99<br>(0.98–1.01) |
| Kansas           | 1993        | 1.0<br>(0.99–1.02)  |

**Table 15 Ratio of adjusted to unadjusted 5q0 values for scaled locations by year**

| <b>Geography</b> | <b>Year</b> | <b>Ratio</b>        |
|------------------|-------------|---------------------|
| Kansas           | 1994        | 1.0<br>(0.99–1.02)  |
| Kansas           | 1995        | 0.99<br>(0.98–1.01) |
| Kansas           | 1996        | 1.0<br>(0.98–1.01)  |
| Kansas           | 1997        | 1.0<br>(0.98–1.02)  |
| Kansas           | 1998        | 1.01<br>(0.99–1.02) |
| Kansas           | 1999        | 1.0<br>(0.99–1.01)  |
| Kansas           | 2000        | 1.0<br>(0.99–1.01)  |
| Kansas           | 2001        | 0.99<br>(0.98–1.01) |
| Kansas           | 2002        | 1.0<br>(0.98–1.02)  |
| Kansas           | 2003        | 1.0<br>(0.98–1.02)  |
| Kansas           | 2004        | 1.0<br>(0.98–1.01)  |
| Kansas           | 2005        | 1.0<br>(0.99–1.01)  |
| Kansas           | 2006        | 1.0<br>(0.98–1.02)  |
| Kansas           | 2007        | 1.01<br>(0.99–1.02) |
| Kansas           | 2008        | 1.0<br>(0.99–1.02)  |
| Kansas           | 2009        | 1.0<br>(0.98–1.01)  |
| Kansas           | 2010        | 0.99<br>(0.97–1.01) |
| Kansas           | 2011        | 1.0<br>(0.98–1.02)  |
| Kansas           | 2012        | 1.0<br>(0.98–1.02)  |
| Kansas           | 2013        | 1.0<br>(0.98–1.02)  |
| Kansas           | 2014        | 1.0<br>(0.98–1.02)  |
| Kansas           | 2015        | 1.0<br>(0.98–1.03)  |
| Kansas           | 2016        | 1.03<br>(0.93–1.13) |
| Kansas           | 2017        | 1.02<br>(0.87–1.18) |
| Kentucky         | 1950        | 0.81<br>(0.67–0.97) |
| Kentucky         | 1951        | 0.86<br>(0.71–1.01) |
| Kentucky         | 1952        | 0.87<br>(0.74–1.02) |
| Kentucky         | 1953        | 0.87<br>(0.73–1.02) |
| Kentucky         | 1954        | 0.85<br>(0.71–1.0)  |
| Kentucky         | 1955        | 0.87<br>(0.73–1.01) |
| Kentucky         | 1956        | 0.89<br>(0.77–1.02) |

**Table 15 Ratio of adjusted to unadjusted 5q0 values for scaled locations by year**

| <b>Geography</b> | <b>Year</b> | <b>Ratio</b>        |
|------------------|-------------|---------------------|
| Kentucky         | 1957        | 0.93<br>(0.83–1.03) |
| Kentucky         | 1958        | 0.96<br>(0.91–1.02) |
| Kentucky         | 1959        | 1.0<br>(0.99–1.01)  |
| Kentucky         | 1960        | 1.0<br>(0.99–1.01)  |
| Kentucky         | 1961        | 1.0<br>(0.99–1.01)  |
| Kentucky         | 1962        | 1.0<br>(0.99–1.01)  |
| Kentucky         | 1963        | 1.01<br>(0.99–1.02) |
| Kentucky         | 1964        | 1.0<br>(0.99–1.01)  |
| Kentucky         | 1965        | 1.0<br>(0.98–1.02)  |
| Kentucky         | 1966        | 1.0<br>(0.98–1.02)  |
| Kentucky         | 1967        | 1.0<br>(0.98–1.01)  |
| Kentucky         | 1968        | 1.0<br>(0.98–1.01)  |
| Kentucky         | 1969        | 1.0<br>(0.99–1.02)  |
| Kentucky         | 1970        | 1.01<br>(0.99–1.02) |
| Kentucky         | 1971        | 1.0<br>(0.98–1.01)  |
| Kentucky         | 1972        | 1.0<br>(0.99–1.01)  |
| Kentucky         | 1973        | 1.0<br>(0.99–1.02)  |
| Kentucky         | 1974        | 1.0<br>(0.99–1.02)  |
| Kentucky         | 1975        | 1.0<br>(0.98–1.01)  |
| Kentucky         | 1976        | 1.0<br>(0.99–1.02)  |
| Kentucky         | 1977        | 1.0<br>(0.98–1.01)  |
| Kentucky         | 1978        | 1.0<br>(0.99–1.01)  |
| Kentucky         | 1979        | 1.0<br>(0.99–1.01)  |
| Kentucky         | 1980        | 1.0<br>(0.99–1.01)  |
| Kentucky         | 1981        | 1.0<br>(0.98–1.01)  |
| Kentucky         | 1982        | 1.0<br>(0.99–1.01)  |
| Kentucky         | 1983        | 1.0<br>(0.98–1.01)  |
| Kentucky         | 1984        | 1.0<br>(0.98–1.01)  |
| Kentucky         | 1985        | 1.0<br>(0.99–1.02)  |
| Kentucky         | 1986        | 1.0<br>(0.99–1.01)  |
| Kentucky         | 1987        | 1.0<br>(0.99–1.01)  |

**Table 15 Ratio of adjusted to unadjusted 5q0 values for scaled locations by year**

| <b>Geography</b> | <b>Year</b> | <b>Ratio</b>        |
|------------------|-------------|---------------------|
| Kentucky         | 1988        | 1.0<br>(0.99–1.02)  |
| Kentucky         | 1989        | 1.01<br>(0.99–1.02) |
| Kentucky         | 1990        | 1.0<br>(0.98–1.01)  |
| Kentucky         | 1991        | 1.0<br>(0.99–1.01)  |
| Kentucky         | 1992        | 0.99<br>(0.98–1.01) |
| Kentucky         | 1993        | 1.0<br>(0.99–1.02)  |
| Kentucky         | 1994        | 1.0<br>(0.99–1.02)  |
| Kentucky         | 1995        | 0.99<br>(0.98–1.01) |
| Kentucky         | 1996        | 1.0<br>(0.98–1.01)  |
| Kentucky         | 1997        | 1.0<br>(0.98–1.02)  |
| Kentucky         | 1998        | 1.01<br>(0.99–1.02) |
| Kentucky         | 1999        | 1.0<br>(0.99–1.01)  |
| Kentucky         | 2000        | 1.0<br>(0.99–1.01)  |
| Kentucky         | 2001        | 0.99<br>(0.98–1.01) |
| Kentucky         | 2002        | 1.0<br>(0.98–1.02)  |
| Kentucky         | 2003        | 1.0<br>(0.98–1.02)  |
| Kentucky         | 2004        | 1.0<br>(0.98–1.01)  |
| Kentucky         | 2005        | 1.0<br>(0.99–1.01)  |
| Kentucky         | 2006        | 1.0<br>(0.98–1.02)  |
| Kentucky         | 2007        | 1.01<br>(0.99–1.02) |
| Kentucky         | 2008        | 1.0<br>(0.99–1.02)  |
| Kentucky         | 2009        | 1.0<br>(0.98–1.01)  |
| Kentucky         | 2010        | 0.99<br>(0.97–1.01) |
| Kentucky         | 2011        | 1.0<br>(0.98–1.02)  |
| Kentucky         | 2012        | 1.0<br>(0.98–1.02)  |
| Kentucky         | 2013        | 1.0<br>(0.98–1.02)  |
| Kentucky         | 2014        | 1.0<br>(0.98–1.02)  |
| Kentucky         | 2015        | 1.0<br>(0.98–1.03)  |
| Kentucky         | 2016        | 1.03<br>(0.93–1.13) |
| Kentucky         | 2017        | 1.02<br>(0.87–1.18) |
| Louisiana        | 1950        | 0.81<br>(0.67–0.97) |

**Table 15 Ratio of adjusted to unadjusted 5q0 values for scaled locations by year**

| <b>Geography</b> | <b>Year</b> | <b>Ratio</b>        |
|------------------|-------------|---------------------|
| Louisiana        | 1951        | 0.86<br>(0.71–1.01) |
| Louisiana        | 1952        | 0.87<br>(0.74–1.02) |
| Louisiana        | 1953        | 0.87<br>(0.73–1.02) |
| Louisiana        | 1954        | 0.86<br>(0.72–1.0)  |
| Louisiana        | 1955        | 0.87<br>(0.73–1.01) |
| Louisiana        | 1956        | 0.89<br>(0.77–1.02) |
| Louisiana        | 1957        | 0.93<br>(0.83–1.03) |
| Louisiana        | 1958        | 0.96<br>(0.91–1.02) |
| Louisiana        | 1959        | 1.0<br>(0.99–1.01)  |
| Louisiana        | 1960        | 1.0<br>(0.99–1.01)  |
| Louisiana        | 1961        | 1.0<br>(0.99–1.01)  |
| Louisiana        | 1962        | 1.0<br>(0.99–1.01)  |
| Louisiana        | 1963        | 1.01<br>(0.99–1.02) |
| Louisiana        | 1964        | 1.0<br>(0.99–1.01)  |
| Louisiana        | 1965        | 1.0<br>(0.98–1.02)  |
| Louisiana        | 1966        | 1.0<br>(0.98–1.02)  |
| Louisiana        | 1967        | 1.0<br>(0.98–1.01)  |
| Louisiana        | 1968        | 1.0<br>(0.98–1.01)  |
| Louisiana        | 1969        | 1.0<br>(0.99–1.02)  |
| Louisiana        | 1970        | 1.01<br>(0.99–1.02) |
| Louisiana        | 1971        | 1.0<br>(0.98–1.01)  |
| Louisiana        | 1972        | 1.0<br>(0.99–1.01)  |
| Louisiana        | 1973        | 1.0<br>(0.99–1.02)  |
| Louisiana        | 1974        | 1.0<br>(0.99–1.02)  |
| Louisiana        | 1975        | 1.0<br>(0.98–1.01)  |
| Louisiana        | 1976        | 1.0<br>(0.99–1.02)  |
| Louisiana        | 1977        | 1.0<br>(0.98–1.01)  |
| Louisiana        | 1978        | 1.0<br>(0.99–1.01)  |
| Louisiana        | 1979        | 1.0<br>(0.99–1.01)  |
| Louisiana        | 1980        | 1.0<br>(0.99–1.01)  |
| Louisiana        | 1981        | 1.0<br>(0.98–1.01)  |

**Table 15 Ratio of adjusted to unadjusted 5q0 values for scaled locations by year**

| <b>Geography</b> | <b>Year</b> | <b>Ratio</b>        |
|------------------|-------------|---------------------|
| Louisiana        | 1982        | 1.0<br>(0.99–1.01)  |
| Louisiana        | 1983        | 1.0<br>(0.98–1.01)  |
| Louisiana        | 1984        | 1.0<br>(0.98–1.01)  |
| Louisiana        | 1985        | 1.0<br>(0.99–1.02)  |
| Louisiana        | 1986        | 1.0<br>(0.99–1.01)  |
| Louisiana        | 1987        | 1.0<br>(0.99–1.01)  |
| Louisiana        | 1988        | 1.0<br>(0.99–1.02)  |
| Louisiana        | 1989        | 1.01<br>(0.99–1.02) |
| Louisiana        | 1990        | 1.0<br>(0.98–1.01)  |
| Louisiana        | 1991        | 1.0<br>(0.99–1.01)  |
| Louisiana        | 1992        | 0.99<br>(0.98–1.01) |
| Louisiana        | 1993        | 1.0<br>(0.99–1.02)  |
| Louisiana        | 1994        | 1.0<br>(0.99–1.02)  |
| Louisiana        | 1995        | 0.99<br>(0.98–1.01) |
| Louisiana        | 1996        | 1.0<br>(0.98–1.01)  |
| Louisiana        | 1997        | 1.0<br>(0.98–1.02)  |
| Louisiana        | 1998        | 1.01<br>(0.99–1.02) |
| Louisiana        | 1999        | 1.0<br>(0.99–1.01)  |
| Louisiana        | 2000        | 1.0<br>(0.99–1.01)  |
| Louisiana        | 2001        | 0.99<br>(0.98–1.01) |
| Louisiana        | 2002        | 1.0<br>(0.98–1.02)  |
| Louisiana        | 2003        | 1.0<br>(0.98–1.02)  |
| Louisiana        | 2004        | 1.0<br>(0.98–1.01)  |
| Louisiana        | 2005        | 1.0<br>(0.99–1.01)  |
| Louisiana        | 2006        | 1.0<br>(0.98–1.02)  |
| Louisiana        | 2007        | 1.01<br>(0.99–1.02) |
| Louisiana        | 2008        | 1.0<br>(0.99–1.02)  |
| Louisiana        | 2009        | 1.0<br>(0.98–1.01)  |
| Louisiana        | 2010        | 0.99<br>(0.97–1.01) |
| Louisiana        | 2011        | 1.0<br>(0.98–1.02)  |
| Louisiana        | 2012        | 1.0<br>(0.98–1.02)  |

**Table 15 Ratio of adjusted to unadjusted 5q0 values for scaled locations by year**

| <b>Geography</b> | <b>Year</b> | <b>Ratio</b>        |
|------------------|-------------|---------------------|
| Louisiana        | 2013        | 1.0<br>(0.98–1.02)  |
| Louisiana        | 2014        | 1.0<br>(0.98–1.02)  |
| Louisiana        | 2015        | 1.0<br>(0.98–1.03)  |
| Louisiana        | 2016        | 1.03<br>(0.93–1.13) |
| Louisiana        | 2017        | 1.02<br>(0.87–1.18) |
| Maine            | 1950        | 0.81<br>(0.67–0.97) |
| Maine            | 1951        | 0.86<br>(0.71–1.01) |
| Maine            | 1952        | 0.87<br>(0.74–1.02) |
| Maine            | 1953        | 0.87<br>(0.73–1.02) |
| Maine            | 1954        | 0.85<br>(0.71–1.0)  |
| Maine            | 1955        | 0.87<br>(0.73–1.01) |
| Maine            | 1956        | 0.89<br>(0.77–1.02) |
| Maine            | 1957        | 0.93<br>(0.83–1.03) |
| Maine            | 1958        | 0.96<br>(0.9–1.02)  |
| Maine            | 1959        | 1.0<br>(0.99–1.01)  |
| Maine            | 1960        | 1.0<br>(0.99–1.01)  |
| Maine            | 1961        | 1.0<br>(0.99–1.01)  |
| Maine            | 1962        | 1.0<br>(0.99–1.01)  |
| Maine            | 1963        | 1.01<br>(0.99–1.02) |
| Maine            | 1964        | 1.0<br>(0.99–1.01)  |
| Maine            | 1965        | 1.0<br>(0.98–1.02)  |
| Maine            | 1966        | 1.0<br>(0.98–1.02)  |
| Maine            | 1967        | 1.0<br>(0.98–1.01)  |
| Maine            | 1968        | 1.0<br>(0.98–1.01)  |
| Maine            | 1969        | 1.0<br>(0.99–1.02)  |
| Maine            | 1970        | 1.01<br>(0.99–1.02) |
| Maine            | 1971        | 1.0<br>(0.98–1.01)  |
| Maine            | 1972        | 1.0<br>(0.99–1.01)  |
| Maine            | 1973        | 1.0<br>(0.99–1.02)  |
| Maine            | 1974        | 1.0<br>(0.99–1.02)  |
| Maine            | 1975        | 1.0<br>(0.98–1.01)  |



**Table 15 Ratio of adjusted to unadjusted 5q0 values for scaled locations by year**

| <b>Geography</b> | <b>Year</b> | <b>Ratio</b>        |
|------------------|-------------|---------------------|
| Maine            | 1976        | 1.0<br>(0.99–1.02)  |
| Maine            | 1977        | 1.0<br>(0.98–1.01)  |
| Maine            | 1978        | 1.0<br>(0.99–1.01)  |
| Maine            | 1979        | 1.0<br>(0.99–1.01)  |
| Maine            | 1980        | 1.0<br>(0.99–1.01)  |
| Maine            | 1981        | 1.0<br>(0.98–1.01)  |
| Maine            | 1982        | 1.0<br>(0.99–1.01)  |
| Maine            | 1983        | 1.0<br>(0.98–1.01)  |
| Maine            | 1984        | 1.0<br>(0.98–1.01)  |
| Maine            | 1985        | 1.0<br>(0.99–1.02)  |
| Maine            | 1986        | 1.0<br>(0.99–1.01)  |
| Maine            | 1987        | 1.0<br>(0.99–1.01)  |
| Maine            | 1988        | 1.0<br>(0.99–1.02)  |
| Maine            | 1989        | 1.01<br>(0.99–1.02) |
| Maine            | 1990        | 1.0<br>(0.98–1.01)  |
| Maine            | 1991        | 1.0<br>(0.99–1.01)  |
| Maine            | 1992        | 0.99<br>(0.98–1.01) |
| Maine            | 1993        | 1.0<br>(0.99–1.02)  |
| Maine            | 1994        | 1.0<br>(0.99–1.02)  |
| Maine            | 1995        | 0.99<br>(0.98–1.01) |
| Maine            | 1996        | 1.0<br>(0.98–1.01)  |
| Maine            | 1997        | 1.0<br>(0.98–1.02)  |
| Maine            | 1998        | 1.01<br>(0.99–1.02) |
| Maine            | 1999        | 1.0<br>(0.99–1.01)  |
| Maine            | 2000        | 1.0<br>(0.99–1.01)  |
| Maine            | 2001        | 0.99<br>(0.98–1.01) |
| Maine            | 2002        | 1.0<br>(0.98–1.02)  |
| Maine            | 2003        | 1.0<br>(0.98–1.02)  |
| Maine            | 2004        | 1.0<br>(0.98–1.01)  |
| Maine            | 2005        | 1.0<br>(0.99–1.01)  |
| Maine            | 2006        | 1.0<br>(0.98–1.02)  |

**Table 15 Ratio of adjusted to unadjusted 5q0 values for scaled locations by year**

| <b>Geography</b> | <b>Year</b> | <b>Ratio</b>        |
|------------------|-------------|---------------------|
| Maine            | 2007        | 1.01<br>(0.99–1.02) |
| Maine            | 2008        | 1.0<br>(0.99–1.02)  |
| Maine            | 2009        | 1.0<br>(0.98–1.01)  |
| Maine            | 2010        | 0.99<br>(0.97–1.01) |
| Maine            | 2011        | 1.0<br>(0.98–1.02)  |
| Maine            | 2012        | 1.0<br>(0.98–1.02)  |
| Maine            | 2013        | 1.0<br>(0.98–1.02)  |
| Maine            | 2014        | 1.0<br>(0.98–1.02)  |
| Maine            | 2015        | 1.0<br>(0.98–1.03)  |
| Maine            | 2016        | 1.03<br>(0.93–1.13) |
| Maine            | 2017        | 1.02<br>(0.87–1.18) |
| Maryland         | 1950        | 0.81<br>(0.67–0.97) |
| Maryland         | 1951        | 0.86<br>(0.71–1.01) |
| Maryland         | 1952        | 0.87<br>(0.74–1.02) |
| Maryland         | 1953        | 0.87<br>(0.73–1.02) |
| Maryland         | 1954        | 0.85<br>(0.71–1.0)  |
| Maryland         | 1955        | 0.87<br>(0.73–1.01) |
| Maryland         | 1956        | 0.89<br>(0.77–1.02) |
| Maryland         | 1957        | 0.93<br>(0.83–1.03) |
| Maryland         | 1958        | 0.96<br>(0.91–1.02) |
| Maryland         | 1959        | 1.0<br>(0.99–1.01)  |
| Maryland         | 1960        | 1.0<br>(0.99–1.01)  |
| Maryland         | 1961        | 1.0<br>(0.99–1.01)  |
| Maryland         | 1962        | 1.0<br>(0.99–1.01)  |
| Maryland         | 1963        | 1.01<br>(0.99–1.02) |
| Maryland         | 1964        | 1.0<br>(0.99–1.01)  |
| Maryland         | 1965        | 1.0<br>(0.98–1.02)  |
| Maryland         | 1966        | 1.0<br>(0.98–1.02)  |
| Maryland         | 1967        | 1.0<br>(0.98–1.01)  |
| Maryland         | 1968        | 1.0<br>(0.98–1.01)  |
| Maryland         | 1969        | 1.0<br>(0.99–1.02)  |

**Table 15 Ratio of adjusted to unadjusted 5q0 values for scaled locations by year**

| <b>Geography</b> | <b>Year</b> | <b>Ratio</b>        |
|------------------|-------------|---------------------|
| Maryland         | 1970        | 1.01<br>(0.99–1.02) |
| Maryland         | 1971        | 1.0<br>(0.98–1.01)  |
| Maryland         | 1972        | 1.0<br>(0.99–1.01)  |
| Maryland         | 1973        | 1.0<br>(0.99–1.02)  |
| Maryland         | 1974        | 1.0<br>(0.99–1.02)  |
| Maryland         | 1975        | 1.0<br>(0.98–1.01)  |
| Maryland         | 1976        | 1.0<br>(0.99–1.02)  |
| Maryland         | 1977        | 1.0<br>(0.98–1.01)  |
| Maryland         | 1978        | 1.0<br>(0.99–1.01)  |
| Maryland         | 1979        | 1.0<br>(0.99–1.01)  |
| Maryland         | 1980        | 1.0<br>(0.99–1.01)  |
| Maryland         | 1981        | 1.0<br>(0.98–1.01)  |
| Maryland         | 1982        | 1.0<br>(0.99–1.01)  |
| Maryland         | 1983        | 1.0<br>(0.98–1.01)  |
| Maryland         | 1984        | 1.0<br>(0.98–1.01)  |
| Maryland         | 1985        | 1.0<br>(0.99–1.02)  |
| Maryland         | 1986        | 1.0<br>(0.99–1.01)  |
| Maryland         | 1987        | 1.0<br>(0.99–1.01)  |
| Maryland         | 1988        | 1.0<br>(0.99–1.02)  |
| Maryland         | 1989        | 1.01<br>(0.99–1.02) |
| Maryland         | 1990        | 1.0<br>(0.98–1.01)  |
| Maryland         | 1991        | 1.0<br>(0.99–1.01)  |
| Maryland         | 1992        | 0.99<br>(0.98–1.01) |
| Maryland         | 1993        | 1.0<br>(0.99–1.02)  |
| Maryland         | 1994        | 1.0<br>(0.99–1.02)  |
| Maryland         | 1995        | 0.99<br>(0.98–1.01) |
| Maryland         | 1996        | 1.0<br>(0.98–1.01)  |
| Maryland         | 1997        | 1.0<br>(0.98–1.02)  |
| Maryland         | 1998        | 1.01<br>(0.99–1.02) |
| Maryland         | 1999        | 1.0<br>(0.99–1.01)  |
| Maryland         | 2000        | 1.0<br>(0.99–1.01)  |

**Table 15 Ratio of adjusted to unadjusted 5q0 values for scaled locations by year**

| <b>Geography</b> | <b>Year</b> | <b>Ratio</b>        |
|------------------|-------------|---------------------|
| Maryland         | 2001        | 0.99<br>(0.98–1.01) |
| Maryland         | 2002        | 1.0<br>(0.98–1.02)  |
| Maryland         | 2003        | 1.0<br>(0.98–1.02)  |
| Maryland         | 2004        | 1.0<br>(0.98–1.01)  |
| Maryland         | 2005        | 1.0<br>(0.99–1.01)  |
| Maryland         | 2006        | 1.0<br>(0.98–1.02)  |
| Maryland         | 2007        | 1.01<br>(0.99–1.02) |
| Maryland         | 2008        | 1.0<br>(0.99–1.02)  |
| Maryland         | 2009        | 1.0<br>(0.98–1.01)  |
| Maryland         | 2010        | 0.99<br>(0.97–1.01) |
| Maryland         | 2011        | 1.0<br>(0.98–1.02)  |
| Maryland         | 2012        | 1.0<br>(0.98–1.02)  |
| Maryland         | 2013        | 1.0<br>(0.98–1.02)  |
| Maryland         | 2014        | 1.0<br>(0.98–1.02)  |
| Maryland         | 2015        | 1.0<br>(0.98–1.03)  |
| Maryland         | 2016        | 1.03<br>(0.93–1.13) |
| Maryland         | 2017        | 1.02<br>(0.87–1.18) |
| Massachusetts    | 1950        | 0.81<br>(0.67–0.97) |
| Massachusetts    | 1951        | 0.86<br>(0.71–1.01) |
| Massachusetts    | 1952        | 0.87<br>(0.74–1.02) |
| Massachusetts    | 1953        | 0.87<br>(0.73–1.02) |
| Massachusetts    | 1954        | 0.85<br>(0.71–1.0)  |
| Massachusetts    | 1955        | 0.87<br>(0.73–1.01) |
| Massachusetts    | 1956        | 0.89<br>(0.77–1.02) |
| Massachusetts    | 1957        | 0.93<br>(0.83–1.03) |
| Massachusetts    | 1958        | 0.96<br>(0.9–1.02)  |
| Massachusetts    | 1959        | 1.0<br>(0.99–1.01)  |
| Massachusetts    | 1960        | 1.0<br>(0.99–1.01)  |
| Massachusetts    | 1961        | 1.0<br>(0.99–1.01)  |
| Massachusetts    | 1962        | 1.0<br>(0.99–1.01)  |
| Massachusetts    | 1963        | 1.01<br>(0.99–1.02) |

**Table 15 Ratio of adjusted to unadjusted 5q0 values for scaled locations by year**

| <b>Geography</b> | <b>Year</b> | <b>Ratio</b>        |
|------------------|-------------|---------------------|
| Massachusetts    | 1964        | 1.0<br>(0.99–1.01)  |
| Massachusetts    | 1965        | 1.0<br>(0.98–1.02)  |
| Massachusetts    | 1966        | 1.0<br>(0.98–1.02)  |
| Massachusetts    | 1967        | 1.0<br>(0.98–1.01)  |
| Massachusetts    | 1968        | 1.0<br>(0.98–1.01)  |
| Massachusetts    | 1969        | 1.0<br>(0.99–1.02)  |
| Massachusetts    | 1970        | 1.01<br>(0.99–1.02) |
| Massachusetts    | 1971        | 1.0<br>(0.98–1.01)  |
| Massachusetts    | 1972        | 1.0<br>(0.99–1.01)  |
| Massachusetts    | 1973        | 1.0<br>(0.99–1.02)  |
| Massachusetts    | 1974        | 1.0<br>(0.99–1.02)  |
| Massachusetts    | 1975        | 1.0<br>(0.98–1.01)  |
| Massachusetts    | 1976        | 1.0<br>(0.99–1.02)  |
| Massachusetts    | 1977        | 1.0<br>(0.98–1.01)  |
| Massachusetts    | 1978        | 1.0<br>(0.99–1.01)  |
| Massachusetts    | 1979        | 1.0<br>(0.99–1.01)  |
| Massachusetts    | 1980        | 1.0<br>(0.99–1.01)  |
| Massachusetts    | 1981        | 1.0<br>(0.98–1.01)  |
| Massachusetts    | 1982        | 1.0<br>(0.99–1.01)  |
| Massachusetts    | 1983        | 1.0<br>(0.98–1.01)  |
| Massachusetts    | 1984        | 1.0<br>(0.98–1.01)  |
| Massachusetts    | 1985        | 1.0<br>(0.99–1.02)  |
| Massachusetts    | 1986        | 1.0<br>(0.99–1.01)  |
| Massachusetts    | 1987        | 1.0<br>(0.99–1.01)  |
| Massachusetts    | 1988        | 1.0<br>(0.99–1.02)  |
| Massachusetts    | 1989        | 1.01<br>(0.99–1.02) |
| Massachusetts    | 1990        | 1.0<br>(0.98–1.01)  |
| Massachusetts    | 1991        | 1.0<br>(0.99–1.01)  |
| Massachusetts    | 1992        | 0.99<br>(0.98–1.01) |
| Massachusetts    | 1993        | 1.0<br>(0.99–1.02)  |
| Massachusetts    | 1994        | 1.0<br>(0.99–1.02)  |

**Table 15 Ratio of adjusted to unadjusted 5q0 values for scaled locations by year**

| <b>Geography</b> | <b>Year</b> | <b>Ratio</b>        |
|------------------|-------------|---------------------|
| Massachusetts    | 1995        | 0.99<br>(0.98–1.01) |
| Massachusetts    | 1996        | 1.0<br>(0.98–1.01)  |
| Massachusetts    | 1997        | 1.0<br>(0.98–1.02)  |
| Massachusetts    | 1998        | 1.01<br>(0.99–1.02) |
| Massachusetts    | 1999        | 1.0<br>(0.99–1.01)  |
| Massachusetts    | 2000        | 1.0<br>(0.99–1.01)  |
| Massachusetts    | 2001        | 0.99<br>(0.98–1.01) |
| Massachusetts    | 2002        | 1.0<br>(0.98–1.02)  |
| Massachusetts    | 2003        | 1.0<br>(0.98–1.02)  |
| Massachusetts    | 2004        | 1.0<br>(0.98–1.01)  |
| Massachusetts    | 2005        | 1.0<br>(0.99–1.01)  |
| Massachusetts    | 2006        | 1.0<br>(0.98–1.02)  |
| Massachusetts    | 2007        | 1.01<br>(0.99–1.02) |
| Massachusetts    | 2008        | 1.0<br>(0.99–1.02)  |
| Massachusetts    | 2009        | 1.0<br>(0.98–1.01)  |
| Massachusetts    | 2010        | 0.99<br>(0.97–1.01) |
| Massachusetts    | 2011        | 1.0<br>(0.98–1.02)  |
| Massachusetts    | 2012        | 1.0<br>(0.98–1.02)  |
| Massachusetts    | 2013        | 1.0<br>(0.98–1.02)  |
| Massachusetts    | 2014        | 1.0<br>(0.98–1.02)  |
| Massachusetts    | 2015        | 1.0<br>(0.98–1.03)  |
| Massachusetts    | 2016        | 1.03<br>(0.93–1.13) |
| Massachusetts    | 2017        | 1.02<br>(0.87–1.18) |
| Michigan         | 1950        | 0.81<br>(0.67–0.97) |
| Michigan         | 1951        | 0.86<br>(0.71–1.01) |
| Michigan         | 1952        | 0.87<br>(0.74–1.02) |
| Michigan         | 1953        | 0.87<br>(0.73–1.02) |
| Michigan         | 1954        | 0.85<br>(0.71–1.0)  |
| Michigan         | 1955        | 0.87<br>(0.73–1.01) |
| Michigan         | 1956        | 0.89<br>(0.77–1.02) |
| Michigan         | 1957        | 0.93<br>(0.83–1.03) |

**Table 15 Ratio of adjusted to unadjusted 5q0 values for scaled locations by year**

| <b>Geography</b> | <b>Year</b> | <b>Ratio</b>        |
|------------------|-------------|---------------------|
| Michigan         | 1958        | 0.96<br>(0.9–1.02)  |
| Michigan         | 1959        | 1.0<br>(0.99–1.01)  |
| Michigan         | 1960        | 1.0<br>(0.99–1.01)  |
| Michigan         | 1961        | 1.0<br>(0.99–1.01)  |
| Michigan         | 1962        | 1.0<br>(0.99–1.01)  |
| Michigan         | 1963        | 1.01<br>(0.99–1.02) |
| Michigan         | 1964        | 1.0<br>(0.99–1.01)  |
| Michigan         | 1965        | 1.0<br>(0.98–1.02)  |
| Michigan         | 1966        | 1.0<br>(0.98–1.02)  |
| Michigan         | 1967        | 1.0<br>(0.98–1.01)  |
| Michigan         | 1968        | 1.0<br>(0.98–1.01)  |
| Michigan         | 1969        | 1.0<br>(0.99–1.02)  |
| Michigan         | 1970        | 1.01<br>(0.99–1.02) |
| Michigan         | 1971        | 1.0<br>(0.98–1.01)  |
| Michigan         | 1972        | 1.0<br>(0.99–1.01)  |
| Michigan         | 1973        | 1.0<br>(0.99–1.02)  |
| Michigan         | 1974        | 1.0<br>(0.99–1.02)  |
| Michigan         | 1975        | 1.0<br>(0.98–1.01)  |
| Michigan         | 1976        | 1.0<br>(0.99–1.02)  |
| Michigan         | 1977        | 1.0<br>(0.98–1.01)  |
| Michigan         | 1978        | 1.0<br>(0.99–1.01)  |
| Michigan         | 1979        | 1.0<br>(0.99–1.01)  |
| Michigan         | 1980        | 1.0<br>(0.99–1.01)  |
| Michigan         | 1981        | 1.0<br>(0.98–1.01)  |
| Michigan         | 1982        | 1.0<br>(0.99–1.01)  |
| Michigan         | 1983        | 1.0<br>(0.98–1.01)  |
| Michigan         | 1984        | 1.0<br>(0.98–1.01)  |
| Michigan         | 1985        | 1.0<br>(0.99–1.02)  |
| Michigan         | 1986        | 1.0<br>(0.99–1.01)  |
| Michigan         | 1987        | 1.0<br>(0.99–1.01)  |
| Michigan         | 1988        | 1.0<br>(0.99–1.02)  |

**Table 15 Ratio of adjusted to unadjusted 5q0 values for scaled locations by year**

| <b>Geography</b> | <b>Year</b> | <b>Ratio</b>        |
|------------------|-------------|---------------------|
| Michigan         | 1989        | 1.01<br>(0.99–1.02) |
| Michigan         | 1990        | 1.0<br>(0.98–1.01)  |
| Michigan         | 1991        | 1.0<br>(0.99–1.01)  |
| Michigan         | 1992        | 0.99<br>(0.98–1.01) |
| Michigan         | 1993        | 1.0<br>(0.99–1.02)  |
| Michigan         | 1994        | 1.0<br>(0.99–1.02)  |
| Michigan         | 1995        | 0.99<br>(0.98–1.01) |
| Michigan         | 1996        | 1.0<br>(0.98–1.01)  |
| Michigan         | 1997        | 1.0<br>(0.98–1.02)  |
| Michigan         | 1998        | 1.01<br>(0.99–1.02) |
| Michigan         | 1999        | 1.0<br>(0.99–1.01)  |
| Michigan         | 2000        | 1.0<br>(0.99–1.01)  |
| Michigan         | 2001        | 0.99<br>(0.98–1.01) |
| Michigan         | 2002        | 1.0<br>(0.98–1.02)  |
| Michigan         | 2003        | 1.0<br>(0.98–1.02)  |
| Michigan         | 2004        | 1.0<br>(0.98–1.01)  |
| Michigan         | 2005        | 1.0<br>(0.99–1.01)  |
| Michigan         | 2006        | 1.0<br>(0.98–1.02)  |
| Michigan         | 2007        | 1.01<br>(0.99–1.02) |
| Michigan         | 2008        | 1.0<br>(0.99–1.02)  |
| Michigan         | 2009        | 1.0<br>(0.98–1.01)  |
| Michigan         | 2010        | 0.99<br>(0.97–1.01) |
| Michigan         | 2011        | 1.0<br>(0.98–1.02)  |
| Michigan         | 2012        | 1.0<br>(0.98–1.02)  |
| Michigan         | 2013        | 1.0<br>(0.98–1.02)  |
| Michigan         | 2014        | 1.0<br>(0.98–1.02)  |
| Michigan         | 2015        | 1.0<br>(0.98–1.03)  |
| Michigan         | 2016        | 1.03<br>(0.93–1.13) |
| Michigan         | 2017        | 1.02<br>(0.87–1.18) |
| Minnesota        | 1950        | 0.81<br>(0.67–0.97) |
| Minnesota        | 1951        | 0.86<br>(0.71–1.01) |



**Table 15 Ratio of adjusted to unadjusted 5q0 values for scaled locations by year**

| <b>Geography</b> | <b>Year</b> | <b>Ratio</b>        |
|------------------|-------------|---------------------|
| Minnesota        | 1952        | 0.87<br>(0.73–1.02) |
| Minnesota        | 1953        | 0.87<br>(0.73–1.02) |
| Minnesota        | 1954        | 0.85<br>(0.71–1.0)  |
| Minnesota        | 1955        | 0.87<br>(0.73–1.01) |
| Minnesota        | 1956        | 0.89<br>(0.77–1.02) |
| Minnesota        | 1957        | 0.93<br>(0.83–1.03) |
| Minnesota        | 1958        | 0.96<br>(0.9–1.02)  |
| Minnesota        | 1959        | 1.0<br>(0.99–1.01)  |
| Minnesota        | 1960        | 1.0<br>(0.99–1.01)  |
| Minnesota        | 1961        | 1.0<br>(0.99–1.01)  |
| Minnesota        | 1962        | 1.0<br>(0.99–1.01)  |
| Minnesota        | 1963        | 1.01<br>(0.99–1.02) |
| Minnesota        | 1964        | 1.0<br>(0.99–1.01)  |
| Minnesota        | 1965        | 1.0<br>(0.98–1.02)  |
| Minnesota        | 1966        | 1.0<br>(0.98–1.02)  |
| Minnesota        | 1967        | 1.0<br>(0.98–1.01)  |
| Minnesota        | 1968        | 1.0<br>(0.98–1.01)  |
| Minnesota        | 1969        | 1.0<br>(0.99–1.02)  |
| Minnesota        | 1970        | 1.01<br>(0.99–1.02) |
| Minnesota        | 1971        | 1.0<br>(0.98–1.01)  |
| Minnesota        | 1972        | 1.0<br>(0.99–1.01)  |
| Minnesota        | 1973        | 1.0<br>(0.99–1.02)  |
| Minnesota        | 1974        | 1.0<br>(0.99–1.02)  |
| Minnesota        | 1975        | 1.0<br>(0.98–1.01)  |
| Minnesota        | 1976        | 1.0<br>(0.99–1.02)  |
| Minnesota        | 1977        | 1.0<br>(0.98–1.01)  |
| Minnesota        | 1978        | 1.0<br>(0.99–1.01)  |
| Minnesota        | 1979        | 1.0<br>(0.99–1.01)  |
| Minnesota        | 1980        | 1.0<br>(0.99–1.01)  |
| Minnesota        | 1981        | 1.0<br>(0.98–1.01)  |
| Minnesota        | 1982        | 1.0<br>(0.99–1.01)  |

**Table 15 Ratio of adjusted to unadjusted 5q0 values for scaled locations by year**

| <b>Geography</b> | <b>Year</b> | <b>Ratio</b>        |
|------------------|-------------|---------------------|
| Minnesota        | 1983        | 1.0<br>(0.98–1.01)  |
| Minnesota        | 1984        | 1.0<br>(0.98–1.01)  |
| Minnesota        | 1985        | 1.0<br>(0.99–1.02)  |
| Minnesota        | 1986        | 1.0<br>(0.99–1.01)  |
| Minnesota        | 1987        | 1.0<br>(0.99–1.01)  |
| Minnesota        | 1988        | 1.0<br>(0.99–1.02)  |
| Minnesota        | 1989        | 1.01<br>(0.99–1.02) |
| Minnesota        | 1990        | 1.0<br>(0.98–1.01)  |
| Minnesota        | 1991        | 1.0<br>(0.99–1.01)  |
| Minnesota        | 1992        | 0.99<br>(0.98–1.01) |
| Minnesota        | 1993        | 1.0<br>(0.99–1.02)  |
| Minnesota        | 1994        | 1.0<br>(0.99–1.02)  |
| Minnesota        | 1995        | 0.99<br>(0.98–1.01) |
| Minnesota        | 1996        | 1.0<br>(0.98–1.01)  |
| Minnesota        | 1997        | 1.0<br>(0.98–1.02)  |
| Minnesota        | 1998        | 1.01<br>(0.99–1.02) |
| Minnesota        | 1999        | 1.0<br>(0.99–1.01)  |
| Minnesota        | 2000        | 1.0<br>(0.99–1.01)  |
| Minnesota        | 2001        | 0.99<br>(0.98–1.01) |
| Minnesota        | 2002        | 1.0<br>(0.98–1.02)  |
| Minnesota        | 2003        | 1.0<br>(0.98–1.02)  |
| Minnesota        | 2004        | 1.0<br>(0.98–1.01)  |
| Minnesota        | 2005        | 1.0<br>(0.99–1.01)  |
| Minnesota        | 2006        | 1.0<br>(0.98–1.02)  |
| Minnesota        | 2007        | 1.01<br>(0.99–1.02) |
| Minnesota        | 2008        | 1.0<br>(0.99–1.02)  |
| Minnesota        | 2009        | 1.0<br>(0.98–1.01)  |
| Minnesota        | 2010        | 0.99<br>(0.97–1.01) |
| Minnesota        | 2011        | 1.0<br>(0.98–1.02)  |
| Minnesota        | 2012        | 1.0<br>(0.98–1.02)  |
| Minnesota        | 2013        | 1.0<br>(0.98–1.02)  |

**Table 15 Ratio of adjusted to unadjusted 5q0 values for scaled locations by year**

| <b>Geography</b> | <b>Year</b> | <b>Ratio</b>        |
|------------------|-------------|---------------------|
| Minnesota        | 2014        | 1.0<br>(0.98–1.02)  |
| Minnesota        | 2015        | 1.0<br>(0.98–1.03)  |
| Minnesota        | 2016        | 1.03<br>(0.93–1.13) |
| Minnesota        | 2017        | 1.02<br>(0.87–1.18) |
| Mississippi      | 1950        | 0.82<br>(0.67–0.97) |
| Mississippi      | 1951        | 0.86<br>(0.71–1.01) |
| Mississippi      | 1952        | 0.87<br>(0.74–1.02) |
| Mississippi      | 1953        | 0.87<br>(0.74–1.02) |
| Mississippi      | 1954        | 0.86<br>(0.72–1.0)  |
| Mississippi      | 1955        | 0.87<br>(0.73–1.01) |
| Mississippi      | 1956        | 0.89<br>(0.78–1.02) |
| Mississippi      | 1957        | 0.93<br>(0.83–1.03) |
| Mississippi      | 1958        | 0.96<br>(0.91–1.02) |
| Mississippi      | 1959        | 1.0<br>(0.99–1.01)  |
| Mississippi      | 1960        | 1.0<br>(0.99–1.01)  |
| Mississippi      | 1961        | 1.0<br>(0.99–1.01)  |
| Mississippi      | 1962        | 1.0<br>(0.99–1.01)  |
| Mississippi      | 1963        | 1.01<br>(0.99–1.02) |
| Mississippi      | 1964        | 1.0<br>(0.99–1.01)  |
| Mississippi      | 1965        | 1.0<br>(0.99–1.02)  |
| Mississippi      | 1966        | 1.0<br>(0.98–1.02)  |
| Mississippi      | 1967        | 1.0<br>(0.98–1.01)  |
| Mississippi      | 1968        | 1.0<br>(0.98–1.01)  |
| Mississippi      | 1969        | 1.0<br>(0.99–1.02)  |
| Mississippi      | 1970        | 1.01<br>(0.99–1.02) |
| Mississippi      | 1971        | 1.0<br>(0.98–1.01)  |
| Mississippi      | 1972        | 1.0<br>(0.99–1.01)  |
| Mississippi      | 1973        | 1.0<br>(0.99–1.02)  |
| Mississippi      | 1974        | 1.0<br>(0.99–1.02)  |
| Mississippi      | 1975        | 1.0<br>(0.98–1.01)  |
| Mississippi      | 1976        | 1.0<br>(0.99–1.02)  |

**Table 15 Ratio of adjusted to unadjusted 5q0 values for scaled locations by year**

| <b>Geography</b> | <b>Year</b> | <b>Ratio</b>        |
|------------------|-------------|---------------------|
| Mississippi      | 1977        | 1.0<br>(0.98–1.01)  |
| Mississippi      | 1978        | 1.0<br>(0.99–1.01)  |
| Mississippi      | 1979        | 1.0<br>(0.99–1.01)  |
| Mississippi      | 1980        | 1.0<br>(0.99–1.01)  |
| Mississippi      | 1981        | 1.0<br>(0.98–1.01)  |
| Mississippi      | 1982        | 1.0<br>(0.99–1.01)  |
| Mississippi      | 1983        | 1.0<br>(0.98–1.01)  |
| Mississippi      | 1984        | 1.0<br>(0.98–1.01)  |
| Mississippi      | 1985        | 1.0<br>(0.99–1.02)  |
| Mississippi      | 1986        | 1.0<br>(0.99–1.01)  |
| Mississippi      | 1987        | 1.0<br>(0.99–1.01)  |
| Mississippi      | 1988        | 1.0<br>(0.99–1.02)  |
| Mississippi      | 1989        | 1.01<br>(0.99–1.02) |
| Mississippi      | 1990        | 1.0<br>(0.98–1.01)  |
| Mississippi      | 1991        | 1.0<br>(0.99–1.01)  |
| Mississippi      | 1992        | 0.99<br>(0.98–1.01) |
| Mississippi      | 1993        | 1.0<br>(0.99–1.02)  |
| Mississippi      | 1994        | 1.0<br>(0.99–1.02)  |
| Mississippi      | 1995        | 0.99<br>(0.98–1.01) |
| Mississippi      | 1996        | 1.0<br>(0.98–1.01)  |
| Mississippi      | 1997        | 1.0<br>(0.98–1.02)  |
| Mississippi      | 1998        | 1.01<br>(0.99–1.02) |
| Mississippi      | 1999        | 1.0<br>(0.99–1.01)  |
| Mississippi      | 2000        | 1.0<br>(0.99–1.01)  |
| Mississippi      | 2001        | 0.99<br>(0.98–1.01) |
| Mississippi      | 2002        | 1.0<br>(0.98–1.02)  |
| Mississippi      | 2003        | 1.0<br>(0.98–1.02)  |
| Mississippi      | 2004        | 1.0<br>(0.98–1.01)  |
| Mississippi      | 2005        | 1.0<br>(0.99–1.01)  |
| Mississippi      | 2006        | 1.0<br>(0.98–1.02)  |
| Mississippi      | 2007        | 1.01<br>(0.99–1.02) |

**Table 15 Ratio of adjusted to unadjusted 5q0 values for scaled locations by year**

| <b>Geography</b> | <b>Year</b> | <b>Ratio</b>        |
|------------------|-------------|---------------------|
| Mississippi      | 2008        | 1.0<br>(0.99–1.02)  |
| Mississippi      | 2009        | 1.0<br>(0.98–1.01)  |
| Mississippi      | 2010        | 0.99<br>(0.98–1.01) |
| Mississippi      | 2011        | 1.0<br>(0.98–1.02)  |
| Mississippi      | 2012        | 1.0<br>(0.98–1.02)  |
| Mississippi      | 2013        | 1.0<br>(0.98–1.02)  |
| Mississippi      | 2014        | 1.0<br>(0.98–1.02)  |
| Mississippi      | 2015        | 1.0<br>(0.98–1.03)  |
| Mississippi      | 2016        | 1.03<br>(0.93–1.13) |
| Mississippi      | 2017        | 1.02<br>(0.87–1.18) |
| Missouri         | 1950        | 0.81<br>(0.67–0.97) |
| Missouri         | 1951        | 0.86<br>(0.71–1.01) |
| Missouri         | 1952        | 0.87<br>(0.74–1.02) |
| Missouri         | 1953        | 0.87<br>(0.73–1.02) |
| Missouri         | 1954        | 0.85<br>(0.71–1.0)  |
| Missouri         | 1955        | 0.87<br>(0.73–1.01) |
| Missouri         | 1956        | 0.89<br>(0.77–1.02) |
| Missouri         | 1957        | 0.93<br>(0.83–1.03) |
| Missouri         | 1958        | 0.96<br>(0.9–1.02)  |
| Missouri         | 1959        | 1.0<br>(0.99–1.01)  |
| Missouri         | 1960        | 1.0<br>(0.99–1.01)  |
| Missouri         | 1961        | 1.0<br>(0.99–1.01)  |
| Missouri         | 1962        | 1.0<br>(0.99–1.01)  |
| Missouri         | 1963        | 1.01<br>(0.99–1.02) |
| Missouri         | 1964        | 1.0<br>(0.99–1.01)  |
| Missouri         | 1965        | 1.0<br>(0.98–1.02)  |
| Missouri         | 1966        | 1.0<br>(0.98–1.02)  |
| Missouri         | 1967        | 1.0<br>(0.98–1.01)  |
| Missouri         | 1968        | 1.0<br>(0.98–1.01)  |
| Missouri         | 1969        | 1.0<br>(0.99–1.02)  |
| Missouri         | 1970        | 1.01<br>(0.99–1.02) |

**Table 15 Ratio of adjusted to unadjusted 5q0 values for scaled locations by year**

| <b>Geography</b> | <b>Year</b> | <b>Ratio</b>        |
|------------------|-------------|---------------------|
| Missouri         | 1971        | 1.0<br>(0.98–1.01)  |
| Missouri         | 1972        | 1.0<br>(0.99–1.01)  |
| Missouri         | 1973        | 1.0<br>(0.99–1.02)  |
| Missouri         | 1974        | 1.0<br>(0.99–1.02)  |
| Missouri         | 1975        | 1.0<br>(0.98–1.01)  |
| Missouri         | 1976        | 1.0<br>(0.99–1.02)  |
| Missouri         | 1977        | 1.0<br>(0.98–1.01)  |
| Missouri         | 1978        | 1.0<br>(0.99–1.01)  |
| Missouri         | 1979        | 1.0<br>(0.99–1.01)  |
| Missouri         | 1980        | 1.0<br>(0.99–1.01)  |
| Missouri         | 1981        | 1.0<br>(0.98–1.01)  |
| Missouri         | 1982        | 1.0<br>(0.99–1.01)  |
| Missouri         | 1983        | 1.0<br>(0.98–1.01)  |
| Missouri         | 1984        | 1.0<br>(0.98–1.01)  |
| Missouri         | 1985        | 1.0<br>(0.99–1.02)  |
| Missouri         | 1986        | 1.0<br>(0.99–1.01)  |
| Missouri         | 1987        | 1.0<br>(0.99–1.01)  |
| Missouri         | 1988        | 1.0<br>(0.99–1.02)  |
| Missouri         | 1989        | 1.01<br>(0.99–1.02) |
| Missouri         | 1990        | 1.0<br>(0.98–1.01)  |
| Missouri         | 1991        | 1.0<br>(0.99–1.01)  |
| Missouri         | 1992        | 0.99<br>(0.98–1.01) |
| Missouri         | 1993        | 1.0<br>(0.99–1.02)  |
| Missouri         | 1994        | 1.0<br>(0.99–1.02)  |
| Missouri         | 1995        | 0.99<br>(0.98–1.01) |
| Missouri         | 1996        | 1.0<br>(0.98–1.01)  |
| Missouri         | 1997        | 1.0<br>(0.98–1.02)  |
| Missouri         | 1998        | 1.01<br>(0.99–1.02) |
| Missouri         | 1999        | 1.0<br>(0.99–1.01)  |
| Missouri         | 2000        | 1.0<br>(0.99–1.01)  |
| Missouri         | 2001        | 0.99<br>(0.98–1.01) |

**Table 15 Ratio of adjusted to unadjusted 5q0 values for scaled locations by year**

| <b>Geography</b> | <b>Year</b> | <b>Ratio</b>        |
|------------------|-------------|---------------------|
| Missouri         | 2002        | 1.0<br>(0.98–1.02)  |
| Missouri         | 2003        | 1.0<br>(0.98–1.02)  |
| Missouri         | 2004        | 1.0<br>(0.98–1.01)  |
| Missouri         | 2005        | 1.0<br>(0.99–1.01)  |
| Missouri         | 2006        | 1.0<br>(0.98–1.02)  |
| Missouri         | 2007        | 1.01<br>(0.99–1.02) |
| Missouri         | 2008        | 1.0<br>(0.99–1.02)  |
| Missouri         | 2009        | 1.0<br>(0.98–1.01)  |
| Missouri         | 2010        | 0.99<br>(0.97–1.01) |
| Missouri         | 2011        | 1.0<br>(0.98–1.02)  |
| Missouri         | 2012        | 1.0<br>(0.98–1.02)  |
| Missouri         | 2013        | 1.0<br>(0.98–1.02)  |
| Missouri         | 2014        | 1.0<br>(0.98–1.02)  |
| Missouri         | 2015        | 1.0<br>(0.98–1.03)  |
| Missouri         | 2016        | 1.03<br>(0.93–1.13) |
| Missouri         | 2017        | 1.02<br>(0.87–1.18) |
| Montana          | 1950        | 0.81<br>(0.67–0.97) |
| Montana          | 1951        | 0.86<br>(0.71–1.01) |
| Montana          | 1952        | 0.87<br>(0.74–1.02) |
| Montana          | 1953        | 0.87<br>(0.73–1.02) |
| Montana          | 1954        | 0.85<br>(0.71–1.0)  |
| Montana          | 1955        | 0.87<br>(0.73–1.01) |
| Montana          | 1956        | 0.89<br>(0.77–1.02) |
| Montana          | 1957        | 0.93<br>(0.83–1.03) |
| Montana          | 1958        | 0.96<br>(0.91–1.02) |
| Montana          | 1959        | 1.0<br>(0.99–1.01)  |
| Montana          | 1960        | 1.0<br>(0.99–1.01)  |
| Montana          | 1961        | 1.0<br>(0.99–1.01)  |
| Montana          | 1962        | 1.0<br>(0.99–1.01)  |
| Montana          | 1963        | 1.01<br>(0.99–1.02) |
| Montana          | 1964        | 1.0<br>(0.99–1.01)  |

**Table 15 Ratio of adjusted to unadjusted 5q0 values for scaled locations by year**

| <b>Geography</b> | <b>Year</b> | <b>Ratio</b>        |
|------------------|-------------|---------------------|
| Montana          | 1965        | 1.0<br>(0.98–1.02)  |
| Montana          | 1966        | 1.0<br>(0.98–1.02)  |
| Montana          | 1967        | 1.0<br>(0.98–1.01)  |
| Montana          | 1968        | 1.0<br>(0.98–1.01)  |
| Montana          | 1969        | 1.0<br>(0.99–1.02)  |
| Montana          | 1970        | 1.01<br>(0.99–1.02) |
| Montana          | 1971        | 1.0<br>(0.98–1.01)  |
| Montana          | 1972        | 1.0<br>(0.99–1.01)  |
| Montana          | 1973        | 1.0<br>(0.99–1.02)  |
| Montana          | 1974        | 1.0<br>(0.99–1.02)  |
| Montana          | 1975        | 1.0<br>(0.98–1.01)  |
| Montana          | 1976        | 1.0<br>(0.99–1.02)  |
| Montana          | 1977        | 1.0<br>(0.98–1.01)  |
| Montana          | 1978        | 1.0<br>(0.99–1.01)  |
| Montana          | 1979        | 1.0<br>(0.99–1.01)  |
| Montana          | 1980        | 1.0<br>(0.99–1.01)  |
| Montana          | 1981        | 1.0<br>(0.98–1.01)  |
| Montana          | 1982        | 1.0<br>(0.99–1.01)  |
| Montana          | 1983        | 1.0<br>(0.98–1.01)  |
| Montana          | 1984        | 1.0<br>(0.98–1.01)  |
| Montana          | 1985        | 1.0<br>(0.99–1.02)  |
| Montana          | 1986        | 1.0<br>(0.99–1.01)  |
| Montana          | 1987        | 1.0<br>(0.99–1.01)  |
| Montana          | 1988        | 1.0<br>(0.99–1.02)  |
| Montana          | 1989        | 1.01<br>(0.99–1.02) |
| Montana          | 1990        | 1.0<br>(0.98–1.01)  |
| Montana          | 1991        | 1.0<br>(0.99–1.01)  |
| Montana          | 1992        | 0.99<br>(0.98–1.01) |
| Montana          | 1993        | 1.0<br>(0.99–1.02)  |
| Montana          | 1994        | 1.0<br>(0.99–1.02)  |
| Montana          | 1995        | 0.99<br>(0.98–1.01) |



**Table 15 Ratio of adjusted to unadjusted 5q0 values for scaled locations by year**

| <b>Geography</b> | <b>Year</b> | <b>Ratio</b>        |
|------------------|-------------|---------------------|
| Montana          | 1996        | 1.0<br>(0.98–1.01)  |
| Montana          | 1997        | 1.0<br>(0.98–1.02)  |
| Montana          | 1998        | 1.01<br>(0.99–1.02) |
| Montana          | 1999        | 1.0<br>(0.99–1.01)  |
| Montana          | 2000        | 1.0<br>(0.99–1.01)  |
| Montana          | 2001        | 0.99<br>(0.98–1.01) |
| Montana          | 2002        | 1.0<br>(0.98–1.02)  |
| Montana          | 2003        | 1.0<br>(0.98–1.02)  |
| Montana          | 2004        | 1.0<br>(0.98–1.01)  |
| Montana          | 2005        | 1.0<br>(0.99–1.01)  |
| Montana          | 2006        | 1.0<br>(0.98–1.02)  |
| Montana          | 2007        | 1.01<br>(0.99–1.02) |
| Montana          | 2008        | 1.0<br>(0.99–1.02)  |
| Montana          | 2009        | 1.0<br>(0.98–1.01)  |
| Montana          | 2010        | 0.99<br>(0.97–1.01) |
| Montana          | 2011        | 1.0<br>(0.98–1.02)  |
| Montana          | 2012        | 1.0<br>(0.98–1.02)  |
| Montana          | 2013        | 1.0<br>(0.98–1.02)  |
| Montana          | 2014        | 1.0<br>(0.98–1.02)  |
| Montana          | 2015        | 1.0<br>(0.98–1.03)  |
| Montana          | 2016        | 1.03<br>(0.93–1.13) |
| Montana          | 2017        | 1.02<br>(0.87–1.18) |
| Nebraska         | 1950        | 0.81<br>(0.67–0.97) |
| Nebraska         | 1951        | 0.86<br>(0.71–1.01) |
| Nebraska         | 1952        | 0.87<br>(0.74–1.02) |
| Nebraska         | 1953        | 0.87<br>(0.73–1.02) |
| Nebraska         | 1954        | 0.85<br>(0.71–1.0)  |
| Nebraska         | 1955        | 0.87<br>(0.73–1.01) |
| Nebraska         | 1956        | 0.89<br>(0.77–1.02) |
| Nebraska         | 1957        | 0.93<br>(0.83–1.03) |
| Nebraska         | 1958        | 0.96<br>(0.9–1.02)  |

**Table 15 Ratio of adjusted to unadjusted 5q0 values for scaled locations by year**

| <b>Geography</b> | <b>Year</b> | <b>Ratio</b>        |
|------------------|-------------|---------------------|
| Nebraska         | 1959        | 1.0<br>(0.99–1.01)  |
| Nebraska         | 1960        | 1.0<br>(0.99–1.01)  |
| Nebraska         | 1961        | 1.0<br>(0.99–1.01)  |
| Nebraska         | 1962        | 1.0<br>(0.99–1.01)  |
| Nebraska         | 1963        | 1.01<br>(0.99–1.02) |
| Nebraska         | 1964        | 1.0<br>(0.99–1.01)  |
| Nebraska         | 1965        | 1.0<br>(0.98–1.02)  |
| Nebraska         | 1966        | 1.0<br>(0.98–1.02)  |
| Nebraska         | 1967        | 1.0<br>(0.98–1.01)  |
| Nebraska         | 1968        | 1.0<br>(0.98–1.01)  |
| Nebraska         | 1969        | 1.0<br>(0.99–1.02)  |
| Nebraska         | 1970        | 1.01<br>(0.99–1.02) |
| Nebraska         | 1971        | 1.0<br>(0.98–1.01)  |
| Nebraska         | 1972        | 1.0<br>(0.99–1.01)  |
| Nebraska         | 1973        | 1.0<br>(0.99–1.02)  |
| Nebraska         | 1974        | 1.0<br>(0.99–1.02)  |
| Nebraska         | 1975        | 1.0<br>(0.98–1.01)  |
| Nebraska         | 1976        | 1.0<br>(0.99–1.02)  |
| Nebraska         | 1977        | 1.0<br>(0.98–1.01)  |
| Nebraska         | 1978        | 1.0<br>(0.99–1.01)  |
| Nebraska         | 1979        | 1.0<br>(0.99–1.01)  |
| Nebraska         | 1980        | 1.0<br>(0.99–1.01)  |
| Nebraska         | 1981        | 1.0<br>(0.98–1.01)  |
| Nebraska         | 1982        | 1.0<br>(0.99–1.01)  |
| Nebraska         | 1983        | 1.0<br>(0.98–1.01)  |
| Nebraska         | 1984        | 1.0<br>(0.98–1.01)  |
| Nebraska         | 1985        | 1.0<br>(0.99–1.02)  |
| Nebraska         | 1986        | 1.0<br>(0.99–1.01)  |
| Nebraska         | 1987        | 1.0<br>(0.99–1.01)  |
| Nebraska         | 1988        | 1.0<br>(0.99–1.02)  |
| Nebraska         | 1989        | 1.01<br>(0.99–1.02) |

**Table 15 Ratio of adjusted to unadjusted 5q0 values for scaled locations by year**

| <b>Geography</b> | <b>Year</b> | <b>Ratio</b>        |
|------------------|-------------|---------------------|
| Nebraska         | 1990        | 1.0<br>(0.98–1.01)  |
| Nebraska         | 1991        | 1.0<br>(0.99–1.01)  |
| Nebraska         | 1992        | 0.99<br>(0.98–1.01) |
| Nebraska         | 1993        | 1.0<br>(0.99–1.02)  |
| Nebraska         | 1994        | 1.0<br>(0.99–1.02)  |
| Nebraska         | 1995        | 0.99<br>(0.98–1.01) |
| Nebraska         | 1996        | 1.0<br>(0.98–1.01)  |
| Nebraska         | 1997        | 1.0<br>(0.98–1.02)  |
| Nebraska         | 1998        | 1.01<br>(0.99–1.02) |
| Nebraska         | 1999        | 1.0<br>(0.99–1.01)  |
| Nebraska         | 2000        | 1.0<br>(0.99–1.01)  |
| Nebraska         | 2001        | 0.99<br>(0.98–1.01) |
| Nebraska         | 2002        | 1.0<br>(0.98–1.02)  |
| Nebraska         | 2003        | 1.0<br>(0.98–1.02)  |
| Nebraska         | 2004        | 1.0<br>(0.98–1.01)  |
| Nebraska         | 2005        | 1.0<br>(0.99–1.01)  |
| Nebraska         | 2006        | 1.0<br>(0.98–1.02)  |
| Nebraska         | 2007        | 1.01<br>(0.99–1.02) |
| Nebraska         | 2008        | 1.0<br>(0.99–1.02)  |
| Nebraska         | 2009        | 1.0<br>(0.98–1.01)  |
| Nebraska         | 2010        | 0.99<br>(0.97–1.01) |
| Nebraska         | 2011        | 1.0<br>(0.98–1.02)  |
| Nebraska         | 2012        | 1.0<br>(0.98–1.02)  |
| Nebraska         | 2013        | 1.0<br>(0.98–1.02)  |
| Nebraska         | 2014        | 1.0<br>(0.98–1.02)  |
| Nebraska         | 2015        | 1.0<br>(0.98–1.03)  |
| Nebraska         | 2016        | 1.03<br>(0.93–1.13) |
| Nebraska         | 2017        | 1.02<br>(0.87–1.18) |
| Nevada           | 1950        | 0.81<br>(0.67–0.97) |
| Nevada           | 1951        | 0.86<br>(0.71–1.01) |
| Nevada           | 1952        | 0.87<br>(0.74–1.02) |

**Table 15 Ratio of adjusted to unadjusted 5q0 values for scaled locations by year**

| <b>Geography</b> | <b>Year</b> | <b>Ratio</b>        |
|------------------|-------------|---------------------|
| Nevada           | 1953        | 0.87<br>(0.73–1.02) |
| Nevada           | 1954        | 0.86<br>(0.71–1.0)  |
| Nevada           | 1955        | 0.87<br>(0.73–1.01) |
| Nevada           | 1956        | 0.89<br>(0.77–1.02) |
| Nevada           | 1957        | 0.93<br>(0.83–1.03) |
| Nevada           | 1958        | 0.96<br>(0.91–1.02) |
| Nevada           | 1959        | 1.0<br>(0.99–1.01)  |
| Nevada           | 1960        | 1.0<br>(0.99–1.01)  |
| Nevada           | 1961        | 1.0<br>(0.99–1.01)  |
| Nevada           | 1962        | 1.0<br>(0.99–1.01)  |
| Nevada           | 1963        | 1.01<br>(0.99–1.02) |
| Nevada           | 1964        | 1.0<br>(0.99–1.01)  |
| Nevada           | 1965        | 1.0<br>(0.98–1.02)  |
| Nevada           | 1966        | 1.0<br>(0.98–1.02)  |
| Nevada           | 1967        | 1.0<br>(0.98–1.01)  |
| Nevada           | 1968        | 1.0<br>(0.98–1.01)  |
| Nevada           | 1969        | 1.0<br>(0.99–1.02)  |
| Nevada           | 1970        | 1.01<br>(0.99–1.02) |
| Nevada           | 1971        | 1.0<br>(0.98–1.01)  |
| Nevada           | 1972        | 1.0<br>(0.99–1.01)  |
| Nevada           | 1973        | 1.0<br>(0.99–1.02)  |
| Nevada           | 1974        | 1.0<br>(0.99–1.02)  |
| Nevada           | 1975        | 1.0<br>(0.98–1.01)  |
| Nevada           | 1976        | 1.0<br>(0.99–1.02)  |
| Nevada           | 1977        | 1.0<br>(0.98–1.01)  |
| Nevada           | 1978        | 1.0<br>(0.99–1.01)  |
| Nevada           | 1979        | 1.0<br>(0.99–1.01)  |
| Nevada           | 1980        | 1.0<br>(0.99–1.01)  |
| Nevada           | 1981        | 1.0<br>(0.98–1.01)  |
| Nevada           | 1982        | 1.0<br>(0.99–1.01)  |
| Nevada           | 1983        | 1.0<br>(0.98–1.01)  |

**Table 15 Ratio of adjusted to unadjusted 5q0 values for scaled locations by year**

| <b>Geography</b> | <b>Year</b> | <b>Ratio</b>        |
|------------------|-------------|---------------------|
| Nevada           | 1984        | 1.0<br>(0.98–1.01)  |
| Nevada           | 1985        | 1.0<br>(0.99–1.02)  |
| Nevada           | 1986        | 1.0<br>(0.99–1.01)  |
| Nevada           | 1987        | 1.0<br>(0.99–1.01)  |
| Nevada           | 1988        | 1.0<br>(0.99–1.02)  |
| Nevada           | 1989        | 1.01<br>(0.99–1.02) |
| Nevada           | 1990        | 1.0<br>(0.98–1.01)  |
| Nevada           | 1991        | 1.0<br>(0.99–1.01)  |
| Nevada           | 1992        | 0.99<br>(0.98–1.01) |
| Nevada           | 1993        | 1.0<br>(0.99–1.02)  |
| Nevada           | 1994        | 1.0<br>(0.99–1.02)  |
| Nevada           | 1995        | 0.99<br>(0.98–1.01) |
| Nevada           | 1996        | 1.0<br>(0.98–1.01)  |
| Nevada           | 1997        | 1.0<br>(0.98–1.02)  |
| Nevada           | 1998        | 1.01<br>(0.99–1.02) |
| Nevada           | 1999        | 1.0<br>(0.99–1.01)  |
| Nevada           | 2000        | 1.0<br>(0.99–1.01)  |
| Nevada           | 2001        | 0.99<br>(0.98–1.01) |
| Nevada           | 2002        | 1.0<br>(0.98–1.02)  |
| Nevada           | 2003        | 1.0<br>(0.98–1.02)  |
| Nevada           | 2004        | 1.0<br>(0.98–1.01)  |
| Nevada           | 2005        | 1.0<br>(0.99–1.01)  |
| Nevada           | 2006        | 1.0<br>(0.98–1.02)  |
| Nevada           | 2007        | 1.01<br>(0.99–1.02) |
| Nevada           | 2008        | 1.0<br>(0.99–1.02)  |
| Nevada           | 2009        | 1.0<br>(0.98–1.01)  |
| Nevada           | 2010        | 0.99<br>(0.97–1.01) |
| Nevada           | 2011        | 1.0<br>(0.98–1.02)  |
| Nevada           | 2012        | 1.0<br>(0.98–1.02)  |
| Nevada           | 2013        | 1.0<br>(0.98–1.02)  |
| Nevada           | 2014        | 1.0<br>(0.98–1.02)  |

**Table 15 Ratio of adjusted to unadjusted 5q0 values for scaled locations by year**

| <b>Geography</b> | <b>Year</b> | <b>Ratio</b>        |
|------------------|-------------|---------------------|
| Nevada           | 2015        | 1.0<br>(0.98–1.03)  |
| Nevada           | 2016        | 1.03<br>(0.93–1.13) |
| Nevada           | 2017        | 1.02<br>(0.87–1.18) |
| New Hampshire    | 1950        | 0.81<br>(0.67–0.97) |
| New Hampshire    | 1951        | 0.86<br>(0.71–1.01) |
| New Hampshire    | 1952        | 0.87<br>(0.74–1.02) |
| New Hampshire    | 1953        | 0.87<br>(0.73–1.02) |
| New Hampshire    | 1954        | 0.85<br>(0.71–1.0)  |
| New Hampshire    | 1955        | 0.87<br>(0.73–1.01) |
| New Hampshire    | 1956        | 0.89<br>(0.77–1.02) |
| New Hampshire    | 1957        | 0.93<br>(0.83–1.03) |
| New Hampshire    | 1958        | 0.96<br>(0.9–1.02)  |
| New Hampshire    | 1959        | 1.0<br>(0.99–1.01)  |
| New Hampshire    | 1960        | 1.0<br>(0.99–1.01)  |
| New Hampshire    | 1961        | 1.0<br>(0.99–1.01)  |
| New Hampshire    | 1962        | 1.0<br>(0.99–1.01)  |
| New Hampshire    | 1963        | 1.01<br>(0.99–1.02) |
| New Hampshire    | 1964        | 1.0<br>(0.99–1.01)  |
| New Hampshire    | 1965        | 1.0<br>(0.98–1.02)  |
| New Hampshire    | 1966        | 1.0<br>(0.98–1.02)  |
| New Hampshire    | 1967        | 1.0<br>(0.98–1.01)  |
| New Hampshire    | 1968        | 1.0<br>(0.98–1.01)  |
| New Hampshire    | 1969        | 1.0<br>(0.99–1.02)  |
| New Hampshire    | 1970        | 1.01<br>(0.99–1.02) |
| New Hampshire    | 1971        | 1.0<br>(0.98–1.01)  |
| New Hampshire    | 1972        | 1.0<br>(0.99–1.01)  |
| New Hampshire    | 1973        | 1.0<br>(0.99–1.02)  |
| New Hampshire    | 1974        | 1.0<br>(0.99–1.02)  |
| New Hampshire    | 1975        | 1.0<br>(0.98–1.01)  |
| New Hampshire    | 1976        | 1.0<br>(0.99–1.02)  |
| New Hampshire    | 1977        | 1.0<br>(0.98–1.01)  |

**Table 15 Ratio of adjusted to unadjusted 5q0 values for scaled locations by year**

| <b>Geography</b> | <b>Year</b> | <b>Ratio</b>        |
|------------------|-------------|---------------------|
| New Hampshire    | 1978        | 1.0<br>(0.99–1.01)  |
| New Hampshire    | 1979        | 1.0<br>(0.99–1.01)  |
| New Hampshire    | 1980        | 1.0<br>(0.99–1.01)  |
| New Hampshire    | 1981        | 1.0<br>(0.98–1.01)  |
| New Hampshire    | 1982        | 1.0<br>(0.99–1.01)  |
| New Hampshire    | 1983        | 1.0<br>(0.98–1.01)  |
| New Hampshire    | 1984        | 1.0<br>(0.98–1.01)  |
| New Hampshire    | 1985        | 1.0<br>(0.99–1.02)  |
| New Hampshire    | 1986        | 1.0<br>(0.99–1.01)  |
| New Hampshire    | 1987        | 1.0<br>(0.99–1.01)  |
| New Hampshire    | 1988        | 1.0<br>(0.99–1.02)  |
| New Hampshire    | 1989        | 1.01<br>(0.99–1.02) |
| New Hampshire    | 1990        | 1.0<br>(0.98–1.01)  |
| New Hampshire    | 1991        | 1.0<br>(0.99–1.01)  |
| New Hampshire    | 1992        | 0.99<br>(0.98–1.01) |
| New Hampshire    | 1993        | 1.0<br>(0.99–1.02)  |
| New Hampshire    | 1994        | 1.0<br>(0.99–1.02)  |
| New Hampshire    | 1995        | 0.99<br>(0.98–1.01) |
| New Hampshire    | 1996        | 1.0<br>(0.98–1.01)  |
| New Hampshire    | 1997        | 1.0<br>(0.98–1.02)  |
| New Hampshire    | 1998        | 1.01<br>(0.99–1.02) |
| New Hampshire    | 1999        | 1.0<br>(0.99–1.01)  |
| New Hampshire    | 2000        | 1.0<br>(0.99–1.01)  |
| New Hampshire    | 2001        | 0.99<br>(0.98–1.01) |
| New Hampshire    | 2002        | 1.0<br>(0.98–1.02)  |
| New Hampshire    | 2003        | 1.0<br>(0.98–1.02)  |
| New Hampshire    | 2004        | 1.0<br>(0.98–1.01)  |
| New Hampshire    | 2005        | 1.0<br>(0.99–1.01)  |
| New Hampshire    | 2006        | 1.0<br>(0.98–1.02)  |
| New Hampshire    | 2007        | 1.01<br>(0.99–1.02) |
| New Hampshire    | 2008        | 1.0<br>(0.99–1.02)  |

**Table 15 Ratio of adjusted to unadjusted 5q0 values for scaled locations by year**

| <b>Geography</b> | <b>Year</b> | <b>Ratio</b>        |
|------------------|-------------|---------------------|
| New Hampshire    | 2009        | 1.0<br>(0.98–1.01)  |
| New Hampshire    | 2010        | 0.99<br>(0.97–1.01) |
| New Hampshire    | 2011        | 1.0<br>(0.98–1.02)  |
| New Hampshire    | 2012        | 1.0<br>(0.98–1.02)  |
| New Hampshire    | 2013        | 1.0<br>(0.98–1.02)  |
| New Hampshire    | 2014        | 1.0<br>(0.98–1.02)  |
| New Hampshire    | 2015        | 1.0<br>(0.98–1.03)  |
| New Hampshire    | 2016        | 1.03<br>(0.93–1.13) |
| New Hampshire    | 2017        | 1.02<br>(0.87–1.18) |
| New Jersey       | 1950        | 0.81<br>(0.67–0.97) |
| New Jersey       | 1951        | 0.86<br>(0.71–1.01) |
| New Jersey       | 1952        | 0.87<br>(0.74–1.02) |
| New Jersey       | 1953        | 0.87<br>(0.73–1.02) |
| New Jersey       | 1954        | 0.85<br>(0.71–1.0)  |
| New Jersey       | 1955        | 0.87<br>(0.73–1.01) |
| New Jersey       | 1956        | 0.89<br>(0.77–1.02) |
| New Jersey       | 1957        | 0.93<br>(0.83–1.03) |
| New Jersey       | 1958        | 0.96<br>(0.9–1.02)  |
| New Jersey       | 1959        | 1.0<br>(0.99–1.01)  |
| New Jersey       | 1960        | 1.0<br>(0.99–1.01)  |
| New Jersey       | 1961        | 1.0<br>(0.99–1.01)  |
| New Jersey       | 1962        | 1.0<br>(0.99–1.01)  |
| New Jersey       | 1963        | 1.01<br>(0.99–1.02) |
| New Jersey       | 1964        | 1.0<br>(0.99–1.01)  |
| New Jersey       | 1965        | 1.0<br>(0.98–1.02)  |
| New Jersey       | 1966        | 1.0<br>(0.98–1.02)  |
| New Jersey       | 1967        | 1.0<br>(0.98–1.01)  |
| New Jersey       | 1968        | 1.0<br>(0.98–1.01)  |
| New Jersey       | 1969        | 1.0<br>(0.99–1.02)  |
| New Jersey       | 1970        | 1.01<br>(0.99–1.02) |
| New Jersey       | 1971        | 1.0<br>(0.98–1.01)  |



**Table 15 Ratio of adjusted to unadjusted 5q0 values for scaled locations by year**

| <b>Geography</b> | <b>Year</b> | <b>Ratio</b>        |
|------------------|-------------|---------------------|
| New Jersey       | 1972        | 1.0<br>(0.99–1.01)  |
| New Jersey       | 1973        | 1.0<br>(0.99–1.02)  |
| New Jersey       | 1974        | 1.0<br>(0.99–1.02)  |
| New Jersey       | 1975        | 1.0<br>(0.98–1.01)  |
| New Jersey       | 1976        | 1.0<br>(0.99–1.02)  |
| New Jersey       | 1977        | 1.0<br>(0.98–1.01)  |
| New Jersey       | 1978        | 1.0<br>(0.99–1.01)  |
| New Jersey       | 1979        | 1.0<br>(0.99–1.01)  |
| New Jersey       | 1980        | 1.0<br>(0.99–1.01)  |
| New Jersey       | 1981        | 1.0<br>(0.98–1.01)  |
| New Jersey       | 1982        | 1.0<br>(0.99–1.01)  |
| New Jersey       | 1983        | 1.0<br>(0.98–1.01)  |
| New Jersey       | 1984        | 1.0<br>(0.98–1.01)  |
| New Jersey       | 1985        | 1.0<br>(0.99–1.02)  |
| New Jersey       | 1986        | 1.0<br>(0.99–1.01)  |
| New Jersey       | 1987        | 1.0<br>(0.99–1.01)  |
| New Jersey       | 1988        | 1.0<br>(0.99–1.02)  |
| New Jersey       | 1989        | 1.01<br>(0.99–1.02) |
| New Jersey       | 1990        | 1.0<br>(0.98–1.01)  |
| New Jersey       | 1991        | 1.0<br>(0.99–1.01)  |
| New Jersey       | 1992        | 0.99<br>(0.98–1.01) |
| New Jersey       | 1993        | 1.0<br>(0.99–1.02)  |
| New Jersey       | 1994        | 1.0<br>(0.99–1.02)  |
| New Jersey       | 1995        | 0.99<br>(0.98–1.01) |
| New Jersey       | 1996        | 1.0<br>(0.98–1.01)  |
| New Jersey       | 1997        | 1.0<br>(0.98–1.02)  |
| New Jersey       | 1998        | 1.01<br>(0.99–1.02) |
| New Jersey       | 1999        | 1.0<br>(0.99–1.01)  |
| New Jersey       | 2000        | 1.0<br>(0.99–1.01)  |
| New Jersey       | 2001        | 0.99<br>(0.98–1.01) |
| New Jersey       | 2002        | 1.0<br>(0.98–1.02)  |

**Table 15 Ratio of adjusted to unadjusted 5q0 values for scaled locations by year**

| <b>Geography</b> | <b>Year</b> | <b>Ratio</b>        |
|------------------|-------------|---------------------|
| New Jersey       | 2003        | 1.0<br>(0.98–1.02)  |
| New Jersey       | 2004        | 1.0<br>(0.98–1.01)  |
| New Jersey       | 2005        | 1.0<br>(0.99–1.01)  |
| New Jersey       | 2006        | 1.0<br>(0.98–1.02)  |
| New Jersey       | 2007        | 1.01<br>(0.99–1.02) |
| New Jersey       | 2008        | 1.0<br>(0.99–1.02)  |
| New Jersey       | 2009        | 1.0<br>(0.98–1.01)  |
| New Jersey       | 2010        | 0.99<br>(0.97–1.01) |
| New Jersey       | 2011        | 1.0<br>(0.98–1.02)  |
| New Jersey       | 2012        | 1.0<br>(0.98–1.02)  |
| New Jersey       | 2013        | 1.0<br>(0.98–1.02)  |
| New Jersey       | 2014        | 1.0<br>(0.98–1.02)  |
| New Jersey       | 2015        | 1.0<br>(0.98–1.03)  |
| New Jersey       | 2016        | 1.03<br>(0.93–1.13) |
| New Jersey       | 2017        | 1.02<br>(0.87–1.18) |
| New Mexico       | 1950        | 0.81<br>(0.67–0.97) |
| New Mexico       | 1951        | 0.86<br>(0.71–1.01) |
| New Mexico       | 1952        | 0.87<br>(0.74–1.02) |
| New Mexico       | 1953        | 0.87<br>(0.73–1.02) |
| New Mexico       | 1954        | 0.86<br>(0.72–1.0)  |
| New Mexico       | 1955        | 0.87<br>(0.73–1.01) |
| New Mexico       | 1956        | 0.89<br>(0.77–1.02) |
| New Mexico       | 1957        | 0.93<br>(0.83–1.03) |
| New Mexico       | 1958        | 0.96<br>(0.91–1.02) |
| New Mexico       | 1959        | 1.0<br>(0.99–1.01)  |
| New Mexico       | 1960        | 1.0<br>(0.99–1.01)  |
| New Mexico       | 1961        | 1.0<br>(0.99–1.01)  |
| New Mexico       | 1962        | 1.0<br>(0.99–1.01)  |
| New Mexico       | 1963        | 1.01<br>(0.99–1.02) |
| New Mexico       | 1964        | 1.0<br>(0.99–1.01)  |
| New Mexico       | 1965        | 1.0<br>(0.98–1.02)  |

**Table 15 Ratio of adjusted to unadjusted 5q0 values for scaled locations by year**

| <b>Geography</b> | <b>Year</b> | <b>Ratio</b>        |
|------------------|-------------|---------------------|
| New Mexico       | 1966        | 1.0<br>(0.98–1.02)  |
| New Mexico       | 1967        | 1.0<br>(0.98–1.01)  |
| New Mexico       | 1968        | 1.0<br>(0.98–1.01)  |
| New Mexico       | 1969        | 1.0<br>(0.99–1.02)  |
| New Mexico       | 1970        | 1.01<br>(0.99–1.02) |
| New Mexico       | 1971        | 1.0<br>(0.98–1.01)  |
| New Mexico       | 1972        | 1.0<br>(0.99–1.01)  |
| New Mexico       | 1973        | 1.0<br>(0.99–1.02)  |
| New Mexico       | 1974        | 1.0<br>(0.99–1.02)  |
| New Mexico       | 1975        | 1.0<br>(0.98–1.01)  |
| New Mexico       | 1976        | 1.0<br>(0.99–1.02)  |
| New Mexico       | 1977        | 1.0<br>(0.98–1.01)  |
| New Mexico       | 1978        | 1.0<br>(0.99–1.01)  |
| New Mexico       | 1979        | 1.0<br>(0.99–1.01)  |
| New Mexico       | 1980        | 1.0<br>(0.99–1.01)  |
| New Mexico       | 1981        | 1.0<br>(0.98–1.01)  |
| New Mexico       | 1982        | 1.0<br>(0.99–1.01)  |
| New Mexico       | 1983        | 1.0<br>(0.98–1.01)  |
| New Mexico       | 1984        | 1.0<br>(0.98–1.01)  |
| New Mexico       | 1985        | 1.0<br>(0.99–1.02)  |
| New Mexico       | 1986        | 1.0<br>(0.99–1.01)  |
| New Mexico       | 1987        | 1.0<br>(0.99–1.01)  |
| New Mexico       | 1988        | 1.0<br>(0.99–1.02)  |
| New Mexico       | 1989        | 1.01<br>(0.99–1.02) |
| New Mexico       | 1990        | 1.0<br>(0.98–1.01)  |
| New Mexico       | 1991        | 1.0<br>(0.99–1.01)  |
| New Mexico       | 1992        | 0.99<br>(0.98–1.01) |
| New Mexico       | 1993        | 1.0<br>(0.99–1.02)  |
| New Mexico       | 1994        | 1.0<br>(0.99–1.02)  |
| New Mexico       | 1995        | 0.99<br>(0.98–1.01) |
| New Mexico       | 1996        | 1.0<br>(0.98–1.01)  |

**Table 15 Ratio of adjusted to unadjusted 5q0 values for scaled locations by year**

| <b>Geography</b> | <b>Year</b> | <b>Ratio</b>        |
|------------------|-------------|---------------------|
| New Mexico       | 1997        | 1.0<br>(0.98–1.02)  |
| New Mexico       | 1998        | 1.01<br>(0.99–1.02) |
| New Mexico       | 1999        | 1.0<br>(0.99–1.01)  |
| New Mexico       | 2000        | 1.0<br>(0.99–1.01)  |
| New Mexico       | 2001        | 0.99<br>(0.98–1.01) |
| New Mexico       | 2002        | 1.0<br>(0.98–1.02)  |
| New Mexico       | 2003        | 1.0<br>(0.98–1.02)  |
| New Mexico       | 2004        | 1.0<br>(0.98–1.01)  |
| New Mexico       | 2005        | 1.0<br>(0.99–1.01)  |
| New Mexico       | 2006        | 1.0<br>(0.98–1.02)  |
| New Mexico       | 2007        | 1.01<br>(0.99–1.02) |
| New Mexico       | 2008        | 1.0<br>(0.99–1.02)  |
| New Mexico       | 2009        | 1.0<br>(0.98–1.01)  |
| New Mexico       | 2010        | 0.99<br>(0.97–1.01) |
| New Mexico       | 2011        | 1.0<br>(0.98–1.02)  |
| New Mexico       | 2012        | 1.0<br>(0.98–1.02)  |
| New Mexico       | 2013        | 1.0<br>(0.98–1.02)  |
| New Mexico       | 2014        | 1.0<br>(0.98–1.02)  |
| New Mexico       | 2015        | 1.0<br>(0.98–1.03)  |
| New Mexico       | 2016        | 1.03<br>(0.93–1.13) |
| New Mexico       | 2017        | 1.02<br>(0.87–1.18) |
| New York         | 1950        | 0.81<br>(0.67–0.97) |
| New York         | 1951        | 0.86<br>(0.71–1.01) |
| New York         | 1952        | 0.87<br>(0.74–1.02) |
| New York         | 1953        | 0.87<br>(0.73–1.02) |
| New York         | 1954        | 0.85<br>(0.71–1.0)  |
| New York         | 1955        | 0.87<br>(0.73–1.01) |
| New York         | 1956        | 0.89<br>(0.77–1.02) |
| New York         | 1957        | 0.93<br>(0.83–1.03) |
| New York         | 1958        | 0.96<br>(0.9–1.02)  |
| New York         | 1959        | 1.0<br>(0.99–1.01)  |

**Table 15 Ratio of adjusted to unadjusted 5q0 values for scaled locations by year**

| <b>Geography</b> | <b>Year</b> | <b>Ratio</b>        |
|------------------|-------------|---------------------|
| New York         | 1960        | 1.0<br>(0.99–1.01)  |
| New York         | 1961        | 1.0<br>(0.99–1.01)  |
| New York         | 1962        | 1.0<br>(0.99–1.01)  |
| New York         | 1963        | 1.01<br>(0.99–1.02) |
| New York         | 1964        | 1.0<br>(0.99–1.01)  |
| New York         | 1965        | 1.0<br>(0.98–1.02)  |
| New York         | 1966        | 1.0<br>(0.98–1.02)  |
| New York         | 1967        | 1.0<br>(0.98–1.01)  |
| New York         | 1968        | 1.0<br>(0.98–1.01)  |
| New York         | 1969        | 1.0<br>(0.99–1.02)  |
| New York         | 1970        | 1.01<br>(0.99–1.02) |
| New York         | 1971        | 1.0<br>(0.98–1.01)  |
| New York         | 1972        | 1.0<br>(0.99–1.01)  |
| New York         | 1973        | 1.0<br>(0.99–1.02)  |
| New York         | 1974        | 1.0<br>(0.99–1.02)  |
| New York         | 1975        | 1.0<br>(0.98–1.01)  |
| New York         | 1976        | 1.0<br>(0.99–1.02)  |
| New York         | 1977        | 1.0<br>(0.98–1.01)  |
| New York         | 1978        | 1.0<br>(0.99–1.01)  |
| New York         | 1979        | 1.0<br>(0.99–1.01)  |
| New York         | 1980        | 1.0<br>(0.99–1.01)  |
| New York         | 1981        | 1.0<br>(0.98–1.01)  |
| New York         | 1982        | 1.0<br>(0.99–1.01)  |
| New York         | 1983        | 1.0<br>(0.98–1.01)  |
| New York         | 1984        | 1.0<br>(0.98–1.01)  |
| New York         | 1985        | 1.0<br>(0.99–1.02)  |
| New York         | 1986        | 1.0<br>(0.99–1.01)  |
| New York         | 1987        | 1.0<br>(0.99–1.01)  |
| New York         | 1988        | 1.0<br>(0.99–1.02)  |
| New York         | 1989        | 1.01<br>(0.99–1.02) |
| New York         | 1990        | 1.0<br>(0.98–1.01)  |

**Table 15 Ratio of adjusted to unadjusted 5q0 values for scaled locations by year**

| <b>Geography</b> | <b>Year</b> | <b>Ratio</b>        |
|------------------|-------------|---------------------|
| New York         | 1991        | 1.0<br>(0.99–1.01)  |
| New York         | 1992        | 0.99<br>(0.98–1.01) |
| New York         | 1993        | 1.0<br>(0.99–1.02)  |
| New York         | 1994        | 1.0<br>(0.99–1.02)  |
| New York         | 1995        | 0.99<br>(0.98–1.01) |
| New York         | 1996        | 1.0<br>(0.98–1.01)  |
| New York         | 1997        | 1.0<br>(0.98–1.02)  |
| New York         | 1998        | 1.01<br>(0.99–1.02) |
| New York         | 1999        | 1.0<br>(0.99–1.01)  |
| New York         | 2000        | 1.0<br>(0.99–1.01)  |
| New York         | 2001        | 0.99<br>(0.98–1.01) |
| New York         | 2002        | 1.0<br>(0.98–1.02)  |
| New York         | 2003        | 1.0<br>(0.98–1.02)  |
| New York         | 2004        | 1.0<br>(0.98–1.01)  |
| New York         | 2005        | 1.0<br>(0.99–1.01)  |
| New York         | 2006        | 1.0<br>(0.98–1.02)  |
| New York         | 2007        | 1.01<br>(0.99–1.02) |
| New York         | 2008        | 1.0<br>(0.99–1.02)  |
| New York         | 2009        | 1.0<br>(0.98–1.01)  |
| New York         | 2010        | 0.99<br>(0.97–1.01) |
| New York         | 2011        | 1.0<br>(0.98–1.02)  |
| New York         | 2012        | 1.0<br>(0.98–1.02)  |
| New York         | 2013        | 1.0<br>(0.98–1.02)  |
| New York         | 2014        | 1.0<br>(0.98–1.02)  |
| New York         | 2015        | 1.0<br>(0.98–1.03)  |
| New York         | 2016        | 1.03<br>(0.93–1.13) |
| New York         | 2017        | 1.02<br>(0.87–1.18) |
| North Carolina   | 1950        | 0.81<br>(0.67–0.97) |
| North Carolina   | 1951        | 0.86<br>(0.71–1.01) |
| North Carolina   | 1952        | 0.87<br>(0.74–1.02) |
| North Carolina   | 1953        | 0.87<br>(0.73–1.02) |

**Table 15 Ratio of adjusted to unadjusted 5q0 values for scaled locations by year**

| <b>Geography</b> | <b>Year</b> | <b>Ratio</b>        |
|------------------|-------------|---------------------|
| North Carolina   | 1954        | 0.86<br>(0.72–1.0)  |
| North Carolina   | 1955        | 0.87<br>(0.73–1.01) |
| North Carolina   | 1956        | 0.89<br>(0.77–1.02) |
| North Carolina   | 1957        | 0.93<br>(0.83–1.03) |
| North Carolina   | 1958        | 0.96<br>(0.91–1.02) |
| North Carolina   | 1959        | 1.0<br>(0.99–1.01)  |
| North Carolina   | 1960        | 1.0<br>(0.99–1.01)  |
| North Carolina   | 1961        | 1.0<br>(0.99–1.01)  |
| North Carolina   | 1962        | 1.0<br>(0.99–1.01)  |
| North Carolina   | 1963        | 1.01<br>(0.99–1.02) |
| North Carolina   | 1964        | 1.0<br>(0.99–1.01)  |
| North Carolina   | 1965        | 1.0<br>(0.98–1.02)  |
| North Carolina   | 1966        | 1.0<br>(0.98–1.02)  |
| North Carolina   | 1967        | 1.0<br>(0.98–1.01)  |
| North Carolina   | 1968        | 1.0<br>(0.98–1.01)  |
| North Carolina   | 1969        | 1.0<br>(0.99–1.02)  |
| North Carolina   | 1970        | 1.01<br>(0.99–1.02) |
| North Carolina   | 1971        | 1.0<br>(0.98–1.01)  |
| North Carolina   | 1972        | 1.0<br>(0.99–1.01)  |
| North Carolina   | 1973        | 1.0<br>(0.99–1.02)  |
| North Carolina   | 1974        | 1.0<br>(0.99–1.02)  |
| North Carolina   | 1975        | 1.0<br>(0.98–1.01)  |
| North Carolina   | 1976        | 1.0<br>(0.99–1.02)  |
| North Carolina   | 1977        | 1.0<br>(0.98–1.01)  |
| North Carolina   | 1978        | 1.0<br>(0.99–1.01)  |
| North Carolina   | 1979        | 1.0<br>(0.99–1.01)  |
| North Carolina   | 1980        | 1.0<br>(0.99–1.01)  |
| North Carolina   | 1981        | 1.0<br>(0.98–1.01)  |
| North Carolina   | 1982        | 1.0<br>(0.99–1.01)  |
| North Carolina   | 1983        | 1.0<br>(0.98–1.01)  |
| North Carolina   | 1984        | 1.0<br>(0.98–1.01)  |

**Table 15 Ratio of adjusted to unadjusted 5q0 values for scaled locations by year**

| <b>Geography</b> | <b>Year</b> | <b>Ratio</b>        |
|------------------|-------------|---------------------|
| North Carolina   | 1985        | 1.0<br>(0.99–1.02)  |
| North Carolina   | 1986        | 1.0<br>(0.99–1.01)  |
| North Carolina   | 1987        | 1.0<br>(0.99–1.01)  |
| North Carolina   | 1988        | 1.0<br>(0.99–1.02)  |
| North Carolina   | 1989        | 1.01<br>(0.99–1.02) |
| North Carolina   | 1990        | 1.0<br>(0.98–1.01)  |
| North Carolina   | 1991        | 1.0<br>(0.99–1.01)  |
| North Carolina   | 1992        | 0.99<br>(0.98–1.01) |
| North Carolina   | 1993        | 1.0<br>(0.99–1.02)  |
| North Carolina   | 1994        | 1.0<br>(0.99–1.02)  |
| North Carolina   | 1995        | 0.99<br>(0.98–1.01) |
| North Carolina   | 1996        | 1.0<br>(0.98–1.01)  |
| North Carolina   | 1997        | 1.0<br>(0.98–1.02)  |
| North Carolina   | 1998        | 1.01<br>(0.99–1.02) |
| North Carolina   | 1999        | 1.0<br>(0.99–1.01)  |
| North Carolina   | 2000        | 1.0<br>(0.99–1.01)  |
| North Carolina   | 2001        | 0.99<br>(0.98–1.01) |
| North Carolina   | 2002        | 1.0<br>(0.98–1.02)  |
| North Carolina   | 2003        | 1.0<br>(0.98–1.02)  |
| North Carolina   | 2004        | 1.0<br>(0.98–1.01)  |
| North Carolina   | 2005        | 1.0<br>(0.99–1.01)  |
| North Carolina   | 2006        | 1.0<br>(0.98–1.02)  |
| North Carolina   | 2007        | 1.01<br>(0.99–1.02) |
| North Carolina   | 2008        | 1.0<br>(0.99–1.02)  |
| North Carolina   | 2009        | 1.0<br>(0.98–1.01)  |
| North Carolina   | 2010        | 0.99<br>(0.97–1.01) |
| North Carolina   | 2011        | 1.0<br>(0.98–1.02)  |
| North Carolina   | 2012        | 1.0<br>(0.98–1.02)  |
| North Carolina   | 2013        | 1.0<br>(0.98–1.02)  |
| North Carolina   | 2014        | 1.0<br>(0.98–1.02)  |
| North Carolina   | 2015        | 1.0<br>(0.98–1.03)  |



**Table 15 Ratio of adjusted to unadjusted 5q0 values for scaled locations by year**

| <b>Geography</b> | <b>Year</b> | <b>Ratio</b>        |
|------------------|-------------|---------------------|
| North Carolina   | 2016        | 1.03<br>(0.93–1.13) |
| North Carolina   | 2017        | 1.02<br>(0.87–1.18) |
| North Dakota     | 1950        | 0.81<br>(0.67–0.97) |
| North Dakota     | 1951        | 0.86<br>(0.71–1.01) |
| North Dakota     | 1952        | 0.87<br>(0.74–1.02) |
| North Dakota     | 1953        | 0.87<br>(0.73–1.02) |
| North Dakota     | 1954        | 0.85<br>(0.71–1.0)  |
| North Dakota     | 1955        | 0.87<br>(0.73–1.01) |
| North Dakota     | 1956        | 0.89<br>(0.77–1.02) |
| North Dakota     | 1957        | 0.93<br>(0.83–1.03) |
| North Dakota     | 1958        | 0.96<br>(0.9–1.02)  |
| North Dakota     | 1959        | 1.0<br>(0.99–1.01)  |
| North Dakota     | 1960        | 1.0<br>(0.99–1.01)  |
| North Dakota     | 1961        | 1.0<br>(0.99–1.01)  |
| North Dakota     | 1962        | 1.0<br>(0.99–1.01)  |
| North Dakota     | 1963        | 1.01<br>(0.99–1.02) |
| North Dakota     | 1964        | 1.0<br>(0.99–1.01)  |
| North Dakota     | 1965        | 1.0<br>(0.98–1.02)  |
| North Dakota     | 1966        | 1.0<br>(0.98–1.02)  |
| North Dakota     | 1967        | 1.0<br>(0.98–1.01)  |
| North Dakota     | 1968        | 1.0<br>(0.98–1.01)  |
| North Dakota     | 1969        | 1.0<br>(0.99–1.02)  |
| North Dakota     | 1970        | 1.01<br>(0.99–1.02) |
| North Dakota     | 1971        | 1.0<br>(0.98–1.01)  |
| North Dakota     | 1972        | 1.0<br>(0.99–1.01)  |
| North Dakota     | 1973        | 1.0<br>(0.99–1.02)  |
| North Dakota     | 1974        | 1.0<br>(0.99–1.02)  |
| North Dakota     | 1975        | 1.0<br>(0.98–1.01)  |
| North Dakota     | 1976        | 1.0<br>(0.99–1.02)  |
| North Dakota     | 1977        | 1.0<br>(0.98–1.01)  |
| North Dakota     | 1978        | 1.0<br>(0.99–1.01)  |

**Table 15 Ratio of adjusted to unadjusted 5q0 values for scaled locations by year**

| <b>Geography</b> | <b>Year</b> | <b>Ratio</b>        |
|------------------|-------------|---------------------|
| North Dakota     | 1979        | 1.0<br>(0.99–1.01)  |
| North Dakota     | 1980        | 1.0<br>(0.99–1.01)  |
| North Dakota     | 1981        | 1.0<br>(0.98–1.01)  |
| North Dakota     | 1982        | 1.0<br>(0.99–1.01)  |
| North Dakota     | 1983        | 1.0<br>(0.98–1.01)  |
| North Dakota     | 1984        | 1.0<br>(0.98–1.01)  |
| North Dakota     | 1985        | 1.0<br>(0.99–1.02)  |
| North Dakota     | 1986        | 1.0<br>(0.99–1.01)  |
| North Dakota     | 1987        | 1.0<br>(0.99–1.01)  |
| North Dakota     | 1988        | 1.0<br>(0.99–1.02)  |
| North Dakota     | 1989        | 1.01<br>(0.99–1.02) |
| North Dakota     | 1990        | 1.0<br>(0.98–1.01)  |
| North Dakota     | 1991        | 1.0<br>(0.99–1.01)  |
| North Dakota     | 1992        | 0.99<br>(0.98–1.01) |
| North Dakota     | 1993        | 1.0<br>(0.99–1.02)  |
| North Dakota     | 1994        | 1.0<br>(0.99–1.02)  |
| North Dakota     | 1995        | 0.99<br>(0.98–1.01) |
| North Dakota     | 1996        | 1.0<br>(0.98–1.01)  |
| North Dakota     | 1997        | 1.0<br>(0.98–1.02)  |
| North Dakota     | 1998        | 1.01<br>(0.99–1.02) |
| North Dakota     | 1999        | 1.0<br>(0.99–1.01)  |
| North Dakota     | 2000        | 1.0<br>(0.99–1.01)  |
| North Dakota     | 2001        | 0.99<br>(0.98–1.01) |
| North Dakota     | 2002        | 1.0<br>(0.98–1.02)  |
| North Dakota     | 2003        | 1.0<br>(0.98–1.02)  |
| North Dakota     | 2004        | 1.0<br>(0.98–1.01)  |
| North Dakota     | 2005        | 1.0<br>(0.99–1.01)  |
| North Dakota     | 2006        | 1.0<br>(0.98–1.02)  |
| North Dakota     | 2007        | 1.01<br>(0.99–1.02) |
| North Dakota     | 2008        | 1.0<br>(0.99–1.02)  |
| North Dakota     | 2009        | 1.0<br>(0.98–1.01)  |

**Table 15 Ratio of adjusted to unadjusted 5q0 values for scaled locations by year**

| <b>Geography</b> | <b>Year</b> | <b>Ratio</b>        |
|------------------|-------------|---------------------|
| North Dakota     | 2010        | 0.99<br>(0.97–1.01) |
| North Dakota     | 2011        | 1.0<br>(0.98–1.02)  |
| North Dakota     | 2012        | 1.0<br>(0.98–1.02)  |
| North Dakota     | 2013        | 1.0<br>(0.98–1.02)  |
| North Dakota     | 2014        | 1.0<br>(0.98–1.02)  |
| North Dakota     | 2015        | 1.0<br>(0.98–1.03)  |
| North Dakota     | 2016        | 1.03<br>(0.93–1.13) |
| North Dakota     | 2017        | 1.02<br>(0.87–1.18) |
| Ohio             | 1950        | 0.81<br>(0.67–0.97) |
| Ohio             | 1951        | 0.86<br>(0.71–1.01) |
| Ohio             | 1952        | 0.87<br>(0.74–1.02) |
| Ohio             | 1953        | 0.87<br>(0.73–1.02) |
| Ohio             | 1954        | 0.85<br>(0.71–1.0)  |
| Ohio             | 1955        | 0.87<br>(0.73–1.01) |
| Ohio             | 1956        | 0.89<br>(0.77–1.02) |
| Ohio             | 1957        | 0.93<br>(0.83–1.03) |
| Ohio             | 1958        | 0.96<br>(0.9–1.02)  |
| Ohio             | 1959        | 1.0<br>(0.99–1.01)  |
| Ohio             | 1960        | 1.0<br>(0.99–1.01)  |
| Ohio             | 1961        | 1.0<br>(0.99–1.01)  |
| Ohio             | 1962        | 1.0<br>(0.99–1.01)  |
| Ohio             | 1963        | 1.01<br>(0.99–1.02) |
| Ohio             | 1964        | 1.0<br>(0.99–1.01)  |
| Ohio             | 1965        | 1.0<br>(0.98–1.02)  |
| Ohio             | 1966        | 1.0<br>(0.98–1.02)  |
| Ohio             | 1967        | 1.0<br>(0.98–1.01)  |
| Ohio             | 1968        | 1.0<br>(0.98–1.01)  |
| Ohio             | 1969        | 1.0<br>(0.99–1.02)  |
| Ohio             | 1970        | 1.01<br>(0.99–1.02) |
| Ohio             | 1971        | 1.0<br>(0.98–1.01)  |
| Ohio             | 1972        | 1.0<br>(0.99–1.01)  |

**Table 15 Ratio of adjusted to unadjusted 5q0 values for scaled locations by year**

| <b>Geography</b> | <b>Year</b> | <b>Ratio</b>        |
|------------------|-------------|---------------------|
| Ohio             | 1973        | 1.0<br>(0.99–1.02)  |
| Ohio             | 1974        | 1.0<br>(0.99–1.02)  |
| Ohio             | 1975        | 1.0<br>(0.98–1.01)  |
| Ohio             | 1976        | 1.0<br>(0.99–1.02)  |
| Ohio             | 1977        | 1.0<br>(0.98–1.01)  |
| Ohio             | 1978        | 1.0<br>(0.99–1.01)  |
| Ohio             | 1979        | 1.0<br>(0.99–1.01)  |
| Ohio             | 1980        | 1.0<br>(0.99–1.01)  |
| Ohio             | 1981        | 1.0<br>(0.98–1.01)  |
| Ohio             | 1982        | 1.0<br>(0.99–1.01)  |
| Ohio             | 1983        | 1.0<br>(0.98–1.01)  |
| Ohio             | 1984        | 1.0<br>(0.98–1.01)  |
| Ohio             | 1985        | 1.0<br>(0.99–1.02)  |
| Ohio             | 1986        | 1.0<br>(0.99–1.01)  |
| Ohio             | 1987        | 1.0<br>(0.99–1.01)  |
| Ohio             | 1988        | 1.0<br>(0.99–1.02)  |
| Ohio             | 1989        | 1.01<br>(0.99–1.02) |
| Ohio             | 1990        | 1.0<br>(0.98–1.01)  |
| Ohio             | 1991        | 1.0<br>(0.99–1.01)  |
| Ohio             | 1992        | 0.99<br>(0.98–1.01) |
| Ohio             | 1993        | 1.0<br>(0.99–1.02)  |
| Ohio             | 1994        | 1.0<br>(0.99–1.02)  |
| Ohio             | 1995        | 0.99<br>(0.98–1.01) |
| Ohio             | 1996        | 1.0<br>(0.98–1.01)  |
| Ohio             | 1997        | 1.0<br>(0.98–1.02)  |
| Ohio             | 1998        | 1.01<br>(0.99–1.02) |
| Ohio             | 1999        | 1.0<br>(0.99–1.01)  |
| Ohio             | 2000        | 1.0<br>(0.99–1.01)  |
| Ohio             | 2001        | 0.99<br>(0.98–1.01) |
| Ohio             | 2002        | 1.0<br>(0.98–1.02)  |
| Ohio             | 2003        | 1.0<br>(0.98–1.02)  |

**Table 15 Ratio of adjusted to unadjusted 5q0 values for scaled locations by year**

| <b>Geography</b> | <b>Year</b> | <b>Ratio</b>        |
|------------------|-------------|---------------------|
| Ohio             | 2004        | 1.0<br>(0.98–1.01)  |
| Ohio             | 2005        | 1.0<br>(0.99–1.01)  |
| Ohio             | 2006        | 1.0<br>(0.98–1.02)  |
| Ohio             | 2007        | 1.01<br>(0.99–1.02) |
| Ohio             | 2008        | 1.0<br>(0.99–1.02)  |
| Ohio             | 2009        | 1.0<br>(0.98–1.01)  |
| Ohio             | 2010        | 0.99<br>(0.97–1.01) |
| Ohio             | 2011        | 1.0<br>(0.98–1.02)  |
| Ohio             | 2012        | 1.0<br>(0.98–1.02)  |
| Ohio             | 2013        | 1.0<br>(0.98–1.02)  |
| Ohio             | 2014        | 1.0<br>(0.98–1.02)  |
| Ohio             | 2015        | 1.0<br>(0.98–1.03)  |
| Ohio             | 2016        | 1.03<br>(0.93–1.13) |
| Ohio             | 2017        | 1.02<br>(0.87–1.18) |
| Oklahoma         | 1950        | 0.81<br>(0.67–0.97) |
| Oklahoma         | 1951        | 0.86<br>(0.71–1.01) |
| Oklahoma         | 1952        | 0.87<br>(0.74–1.02) |
| Oklahoma         | 1953        | 0.87<br>(0.73–1.02) |
| Oklahoma         | 1954        | 0.85<br>(0.71–1.0)  |
| Oklahoma         | 1955        | 0.87<br>(0.73–1.01) |
| Oklahoma         | 1956        | 0.89<br>(0.77–1.02) |
| Oklahoma         | 1957        | 0.93<br>(0.83–1.03) |
| Oklahoma         | 1958        | 0.96<br>(0.9–1.02)  |
| Oklahoma         | 1959        | 1.0<br>(0.99–1.01)  |
| Oklahoma         | 1960        | 1.0<br>(0.99–1.01)  |
| Oklahoma         | 1961        | 1.0<br>(0.99–1.01)  |
| Oklahoma         | 1962        | 1.0<br>(0.99–1.01)  |
| Oklahoma         | 1963        | 1.01<br>(0.99–1.02) |
| Oklahoma         | 1964        | 1.0<br>(0.99–1.01)  |
| Oklahoma         | 1965        | 1.0<br>(0.98–1.02)  |
| Oklahoma         | 1966        | 1.0<br>(0.98–1.02)  |

**Table 15 Ratio of adjusted to unadjusted 5q0 values for scaled locations by year**

| <b>Geography</b> | <b>Year</b> | <b>Ratio</b>        |
|------------------|-------------|---------------------|
| Oklahoma         | 1967        | 1.0<br>(0.98–1.01)  |
| Oklahoma         | 1968        | 1.0<br>(0.98–1.01)  |
| Oklahoma         | 1969        | 1.0<br>(0.99–1.02)  |
| Oklahoma         | 1970        | 1.01<br>(0.99–1.02) |
| Oklahoma         | 1971        | 1.0<br>(0.98–1.01)  |
| Oklahoma         | 1972        | 1.0<br>(0.99–1.01)  |
| Oklahoma         | 1973        | 1.0<br>(0.99–1.02)  |
| Oklahoma         | 1974        | 1.0<br>(0.99–1.02)  |
| Oklahoma         | 1975        | 1.0<br>(0.98–1.01)  |
| Oklahoma         | 1976        | 1.0<br>(0.99–1.02)  |
| Oklahoma         | 1977        | 1.0<br>(0.98–1.01)  |
| Oklahoma         | 1978        | 1.0<br>(0.99–1.01)  |
| Oklahoma         | 1979        | 1.0<br>(0.99–1.01)  |
| Oklahoma         | 1980        | 1.0<br>(0.99–1.01)  |
| Oklahoma         | 1981        | 1.0<br>(0.98–1.01)  |
| Oklahoma         | 1982        | 1.0<br>(0.99–1.01)  |
| Oklahoma         | 1983        | 1.0<br>(0.98–1.01)  |
| Oklahoma         | 1984        | 1.0<br>(0.98–1.01)  |
| Oklahoma         | 1985        | 1.0<br>(0.99–1.02)  |
| Oklahoma         | 1986        | 1.0<br>(0.99–1.01)  |
| Oklahoma         | 1987        | 1.0<br>(0.99–1.01)  |
| Oklahoma         | 1988        | 1.0<br>(0.99–1.02)  |
| Oklahoma         | 1989        | 1.01<br>(0.99–1.02) |
| Oklahoma         | 1990        | 1.0<br>(0.98–1.01)  |
| Oklahoma         | 1991        | 1.0<br>(0.99–1.01)  |
| Oklahoma         | 1992        | 0.99<br>(0.98–1.01) |
| Oklahoma         | 1993        | 1.0<br>(0.99–1.02)  |
| Oklahoma         | 1994        | 1.0<br>(0.99–1.02)  |
| Oklahoma         | 1995        | 0.99<br>(0.98–1.01) |
| Oklahoma         | 1996        | 1.0<br>(0.98–1.01)  |
| Oklahoma         | 1997        | 1.0<br>(0.98–1.02)  |

**Table 15 Ratio of adjusted to unadjusted 5q0 values for scaled locations by year**

| <b>Geography</b> | <b>Year</b> | <b>Ratio</b>        |
|------------------|-------------|---------------------|
| Oklahoma         | 1998        | 1.01<br>(0.99–1.02) |
| Oklahoma         | 1999        | 1.0<br>(0.99–1.01)  |
| Oklahoma         | 2000        | 1.0<br>(0.99–1.01)  |
| Oklahoma         | 2001        | 0.99<br>(0.98–1.01) |
| Oklahoma         | 2002        | 1.0<br>(0.98–1.02)  |
| Oklahoma         | 2003        | 1.0<br>(0.98–1.02)  |
| Oklahoma         | 2004        | 1.0<br>(0.98–1.01)  |
| Oklahoma         | 2005        | 1.0<br>(0.99–1.01)  |
| Oklahoma         | 2006        | 1.0<br>(0.98–1.02)  |
| Oklahoma         | 2007        | 1.01<br>(0.99–1.02) |
| Oklahoma         | 2008        | 1.0<br>(0.99–1.02)  |
| Oklahoma         | 2009        | 1.0<br>(0.98–1.01)  |
| Oklahoma         | 2010        | 0.99<br>(0.97–1.01) |
| Oklahoma         | 2011        | 1.0<br>(0.98–1.02)  |
| Oklahoma         | 2012        | 1.0<br>(0.98–1.02)  |
| Oklahoma         | 2013        | 1.0<br>(0.98–1.02)  |
| Oklahoma         | 2014        | 1.0<br>(0.98–1.02)  |
| Oklahoma         | 2015        | 1.0<br>(0.98–1.03)  |
| Oklahoma         | 2016        | 1.03<br>(0.93–1.13) |
| Oklahoma         | 2017        | 1.02<br>(0.87–1.18) |
| Oregon           | 1950        | 0.81<br>(0.67–0.97) |
| Oregon           | 1951        | 0.86<br>(0.71–1.01) |
| Oregon           | 1952        | 0.87<br>(0.74–1.02) |
| Oregon           | 1953        | 0.87<br>(0.73–1.02) |
| Oregon           | 1954        | 0.85<br>(0.71–1.0)  |
| Oregon           | 1955        | 0.87<br>(0.73–1.01) |
| Oregon           | 1956        | 0.89<br>(0.77–1.02) |
| Oregon           | 1957        | 0.93<br>(0.83–1.03) |
| Oregon           | 1958        | 0.96<br>(0.9–1.02)  |
| Oregon           | 1959        | 1.0<br>(0.99–1.01)  |
| Oregon           | 1960        | 1.0<br>(0.99–1.01)  |

**Table 15 Ratio of adjusted to unadjusted 5q0 values for scaled locations by year**

| <b>Geography</b> | <b>Year</b> | <b>Ratio</b>        |
|------------------|-------------|---------------------|
| Oregon           | 1961        | 1.0<br>(0.99–1.01)  |
| Oregon           | 1962        | 1.0<br>(0.99–1.01)  |
| Oregon           | 1963        | 1.01<br>(0.99–1.02) |
| Oregon           | 1964        | 1.0<br>(0.99–1.01)  |
| Oregon           | 1965        | 1.0<br>(0.98–1.02)  |
| Oregon           | 1966        | 1.0<br>(0.98–1.02)  |
| Oregon           | 1967        | 1.0<br>(0.98–1.01)  |
| Oregon           | 1968        | 1.0<br>(0.98–1.01)  |
| Oregon           | 1969        | 1.0<br>(0.99–1.02)  |
| Oregon           | 1970        | 1.01<br>(0.99–1.02) |
| Oregon           | 1971        | 1.0<br>(0.98–1.01)  |
| Oregon           | 1972        | 1.0<br>(0.99–1.01)  |
| Oregon           | 1973        | 1.0<br>(0.99–1.02)  |
| Oregon           | 1974        | 1.0<br>(0.99–1.02)  |
| Oregon           | 1975        | 1.0<br>(0.98–1.01)  |
| Oregon           | 1976        | 1.0<br>(0.99–1.02)  |
| Oregon           | 1977        | 1.0<br>(0.98–1.01)  |
| Oregon           | 1978        | 1.0<br>(0.99–1.01)  |
| Oregon           | 1979        | 1.0<br>(0.99–1.01)  |
| Oregon           | 1980        | 1.0<br>(0.99–1.01)  |
| Oregon           | 1981        | 1.0<br>(0.98–1.01)  |
| Oregon           | 1982        | 1.0<br>(0.99–1.01)  |
| Oregon           | 1983        | 1.0<br>(0.98–1.01)  |
| Oregon           | 1984        | 1.0<br>(0.98–1.01)  |
| Oregon           | 1985        | 1.0<br>(0.99–1.02)  |
| Oregon           | 1986        | 1.0<br>(0.99–1.01)  |
| Oregon           | 1987        | 1.0<br>(0.99–1.01)  |
| Oregon           | 1988        | 1.0<br>(0.99–1.02)  |
| Oregon           | 1989        | 1.01<br>(0.99–1.02) |
| Oregon           | 1990        | 1.0<br>(0.98–1.01)  |
| Oregon           | 1991        | 1.0<br>(0.99–1.01)  |



**Table 15 Ratio of adjusted to unadjusted 5q0 values for scaled locations by year**

| <b>Geography</b> | <b>Year</b> | <b>Ratio</b>        |
|------------------|-------------|---------------------|
| Oregon           | 1992        | 0.99<br>(0.98–1.01) |
| Oregon           | 1993        | 1.0<br>(0.99–1.02)  |
| Oregon           | 1994        | 1.0<br>(0.99–1.02)  |
| Oregon           | 1995        | 0.99<br>(0.98–1.01) |
| Oregon           | 1996        | 1.0<br>(0.98–1.01)  |
| Oregon           | 1997        | 1.0<br>(0.98–1.02)  |
| Oregon           | 1998        | 1.01<br>(0.99–1.02) |
| Oregon           | 1999        | 1.0<br>(0.99–1.01)  |
| Oregon           | 2000        | 1.0<br>(0.99–1.01)  |
| Oregon           | 2001        | 0.99<br>(0.98–1.01) |
| Oregon           | 2002        | 1.0<br>(0.98–1.02)  |
| Oregon           | 2003        | 1.0<br>(0.98–1.02)  |
| Oregon           | 2004        | 1.0<br>(0.98–1.01)  |
| Oregon           | 2005        | 1.0<br>(0.99–1.01)  |
| Oregon           | 2006        | 1.0<br>(0.98–1.02)  |
| Oregon           | 2007        | 1.01<br>(0.99–1.02) |
| Oregon           | 2008        | 1.0<br>(0.99–1.02)  |
| Oregon           | 2009        | 1.0<br>(0.98–1.01)  |
| Oregon           | 2010        | 0.99<br>(0.97–1.01) |
| Oregon           | 2011        | 1.0<br>(0.98–1.02)  |
| Oregon           | 2012        | 1.0<br>(0.98–1.02)  |
| Oregon           | 2013        | 1.0<br>(0.98–1.02)  |
| Oregon           | 2014        | 1.0<br>(0.98–1.02)  |
| Oregon           | 2015        | 1.0<br>(0.98–1.03)  |
| Oregon           | 2016        | 1.03<br>(0.93–1.13) |
| Oregon           | 2017        | 1.02<br>(0.87–1.18) |
| Pennsylvania     | 1950        | 0.81<br>(0.67–0.97) |
| Pennsylvania     | 1951        | 0.86<br>(0.71–1.01) |
| Pennsylvania     | 1952        | 0.87<br>(0.74–1.02) |
| Pennsylvania     | 1953        | 0.87<br>(0.73–1.02) |
| Pennsylvania     | 1954        | 0.85<br>(0.71–1.0)  |

**Table 15 Ratio of adjusted to unadjusted 5q0 values for scaled locations by year**

| <b>Geography</b> | <b>Year</b> | <b>Ratio</b>        |
|------------------|-------------|---------------------|
| Pennsylvania     | 1955        | 0.87<br>(0.73–1.01) |
| Pennsylvania     | 1956        | 0.89<br>(0.77–1.02) |
| Pennsylvania     | 1957        | 0.93<br>(0.83–1.03) |
| Pennsylvania     | 1958        | 0.96<br>(0.9–1.02)  |
| Pennsylvania     | 1959        | 1.0<br>(0.99–1.01)  |
| Pennsylvania     | 1960        | 1.0<br>(0.99–1.01)  |
| Pennsylvania     | 1961        | 1.0<br>(0.99–1.01)  |
| Pennsylvania     | 1962        | 1.0<br>(0.99–1.01)  |
| Pennsylvania     | 1963        | 1.01<br>(0.99–1.02) |
| Pennsylvania     | 1964        | 1.0<br>(0.99–1.01)  |
| Pennsylvania     | 1965        | 1.0<br>(0.98–1.02)  |
| Pennsylvania     | 1966        | 1.0<br>(0.98–1.02)  |
| Pennsylvania     | 1967        | 1.0<br>(0.98–1.01)  |
| Pennsylvania     | 1968        | 1.0<br>(0.98–1.01)  |
| Pennsylvania     | 1969        | 1.0<br>(0.99–1.02)  |
| Pennsylvania     | 1970        | 1.01<br>(0.99–1.02) |
| Pennsylvania     | 1971        | 1.0<br>(0.98–1.01)  |
| Pennsylvania     | 1972        | 1.0<br>(0.99–1.01)  |
| Pennsylvania     | 1973        | 1.0<br>(0.99–1.02)  |
| Pennsylvania     | 1974        | 1.0<br>(0.99–1.02)  |
| Pennsylvania     | 1975        | 1.0<br>(0.98–1.01)  |
| Pennsylvania     | 1976        | 1.0<br>(0.99–1.02)  |
| Pennsylvania     | 1977        | 1.0<br>(0.98–1.01)  |
| Pennsylvania     | 1978        | 1.0<br>(0.99–1.01)  |
| Pennsylvania     | 1979        | 1.0<br>(0.99–1.01)  |
| Pennsylvania     | 1980        | 1.0<br>(0.99–1.01)  |
| Pennsylvania     | 1981        | 1.0<br>(0.98–1.01)  |
| Pennsylvania     | 1982        | 1.0<br>(0.99–1.01)  |
| Pennsylvania     | 1983        | 1.0<br>(0.98–1.01)  |
| Pennsylvania     | 1984        | 1.0<br>(0.98–1.01)  |
| Pennsylvania     | 1985        | 1.0<br>(0.99–1.02)  |

**Table 15 Ratio of adjusted to unadjusted 5q0 values for scaled locations by year**

| <b>Geography</b> | <b>Year</b> | <b>Ratio</b>        |
|------------------|-------------|---------------------|
| Pennsylvania     | 1986        | 1.0<br>(0.99–1.01)  |
| Pennsylvania     | 1987        | 1.0<br>(0.99–1.01)  |
| Pennsylvania     | 1988        | 1.0<br>(0.99–1.02)  |
| Pennsylvania     | 1989        | 1.01<br>(0.99–1.02) |
| Pennsylvania     | 1990        | 1.0<br>(0.98–1.01)  |
| Pennsylvania     | 1991        | 1.0<br>(0.99–1.01)  |
| Pennsylvania     | 1992        | 0.99<br>(0.98–1.01) |
| Pennsylvania     | 1993        | 1.0<br>(0.99–1.02)  |
| Pennsylvania     | 1994        | 1.0<br>(0.99–1.02)  |
| Pennsylvania     | 1995        | 0.99<br>(0.98–1.01) |
| Pennsylvania     | 1996        | 1.0<br>(0.98–1.01)  |
| Pennsylvania     | 1997        | 1.0<br>(0.98–1.02)  |
| Pennsylvania     | 1998        | 1.01<br>(0.99–1.02) |
| Pennsylvania     | 1999        | 1.0<br>(0.99–1.01)  |
| Pennsylvania     | 2000        | 1.0<br>(0.99–1.01)  |
| Pennsylvania     | 2001        | 0.99<br>(0.98–1.01) |
| Pennsylvania     | 2002        | 1.0<br>(0.98–1.02)  |
| Pennsylvania     | 2003        | 1.0<br>(0.98–1.02)  |
| Pennsylvania     | 2004        | 1.0<br>(0.98–1.01)  |
| Pennsylvania     | 2005        | 1.0<br>(0.99–1.01)  |
| Pennsylvania     | 2006        | 1.0<br>(0.98–1.02)  |
| Pennsylvania     | 2007        | 1.01<br>(0.99–1.02) |
| Pennsylvania     | 2008        | 1.0<br>(0.99–1.02)  |
| Pennsylvania     | 2009        | 1.0<br>(0.98–1.01)  |
| Pennsylvania     | 2010        | 0.99<br>(0.97–1.01) |
| Pennsylvania     | 2011        | 1.0<br>(0.98–1.02)  |
| Pennsylvania     | 2012        | 1.0<br>(0.98–1.02)  |
| Pennsylvania     | 2013        | 1.0<br>(0.98–1.02)  |
| Pennsylvania     | 2014        | 1.0<br>(0.98–1.02)  |
| Pennsylvania     | 2015        | 1.0<br>(0.98–1.03)  |
| Pennsylvania     | 2016        | 1.03<br>(0.93–1.13) |

**Table 15 Ratio of adjusted to unadjusted 5q0 values for scaled locations by year**

| <b>Geography</b> | <b>Year</b> | <b>Ratio</b>        |
|------------------|-------------|---------------------|
| Pennsylvania     | 2017        | 1.02<br>(0.87–1.18) |
| Rhode Island     | 1950        | 0.81<br>(0.67–0.97) |
| Rhode Island     | 1951        | 0.86<br>(0.71–1.01) |
| Rhode Island     | 1952        | 0.87<br>(0.74–1.02) |
| Rhode Island     | 1953        | 0.87<br>(0.73–1.02) |
| Rhode Island     | 1954        | 0.85<br>(0.71–1.0)  |
| Rhode Island     | 1955        | 0.87<br>(0.73–1.01) |
| Rhode Island     | 1956        | 0.89<br>(0.77–1.02) |
| Rhode Island     | 1957        | 0.93<br>(0.83–1.03) |
| Rhode Island     | 1958        | 0.96<br>(0.9–1.02)  |
| Rhode Island     | 1959        | 1.0<br>(0.99–1.01)  |
| Rhode Island     | 1960        | 1.0<br>(0.99–1.01)  |
| Rhode Island     | 1961        | 1.0<br>(0.99–1.01)  |
| Rhode Island     | 1962        | 1.0<br>(0.99–1.01)  |
| Rhode Island     | 1963        | 1.01<br>(0.99–1.02) |
| Rhode Island     | 1964        | 1.0<br>(0.99–1.01)  |
| Rhode Island     | 1965        | 1.0<br>(0.98–1.02)  |
| Rhode Island     | 1966        | 1.0<br>(0.98–1.02)  |
| Rhode Island     | 1967        | 1.0<br>(0.98–1.01)  |
| Rhode Island     | 1968        | 1.0<br>(0.98–1.01)  |
| Rhode Island     | 1969        | 1.0<br>(0.99–1.02)  |
| Rhode Island     | 1970        | 1.01<br>(0.99–1.02) |
| Rhode Island     | 1971        | 1.0<br>(0.98–1.01)  |
| Rhode Island     | 1972        | 1.0<br>(0.99–1.01)  |
| Rhode Island     | 1973        | 1.0<br>(0.99–1.02)  |
| Rhode Island     | 1974        | 1.0<br>(0.99–1.02)  |
| Rhode Island     | 1975        | 1.0<br>(0.98–1.01)  |
| Rhode Island     | 1976        | 1.0<br>(0.99–1.02)  |
| Rhode Island     | 1977        | 1.0<br>(0.98–1.01)  |
| Rhode Island     | 1978        | 1.0<br>(0.99–1.01)  |
| Rhode Island     | 1979        | 1.0<br>(0.99–1.01)  |

**Table 15 Ratio of adjusted to unadjusted 5q0 values for scaled locations by year**

| <b>Geography</b> | <b>Year</b> | <b>Ratio</b>        |
|------------------|-------------|---------------------|
| Rhode Island     | 1980        | 1.0<br>(0.99–1.01)  |
| Rhode Island     | 1981        | 1.0<br>(0.98–1.01)  |
| Rhode Island     | 1982        | 1.0<br>(0.99–1.01)  |
| Rhode Island     | 1983        | 1.0<br>(0.98–1.01)  |
| Rhode Island     | 1984        | 1.0<br>(0.98–1.01)  |
| Rhode Island     | 1985        | 1.0<br>(0.99–1.02)  |
| Rhode Island     | 1986        | 1.0<br>(0.99–1.01)  |
| Rhode Island     | 1987        | 1.0<br>(0.99–1.01)  |
| Rhode Island     | 1988        | 1.0<br>(0.99–1.02)  |
| Rhode Island     | 1989        | 1.01<br>(0.99–1.02) |
| Rhode Island     | 1990        | 1.0<br>(0.98–1.01)  |
| Rhode Island     | 1991        | 1.0<br>(0.99–1.01)  |
| Rhode Island     | 1992        | 0.99<br>(0.98–1.01) |
| Rhode Island     | 1993        | 1.0<br>(0.99–1.02)  |
| Rhode Island     | 1994        | 1.0<br>(0.99–1.02)  |
| Rhode Island     | 1995        | 0.99<br>(0.98–1.01) |
| Rhode Island     | 1996        | 1.0<br>(0.98–1.01)  |
| Rhode Island     | 1997        | 1.0<br>(0.98–1.02)  |
| Rhode Island     | 1998        | 1.01<br>(0.99–1.02) |
| Rhode Island     | 1999        | 1.0<br>(0.99–1.01)  |
| Rhode Island     | 2000        | 1.0<br>(0.99–1.01)  |
| Rhode Island     | 2001        | 0.99<br>(0.98–1.01) |
| Rhode Island     | 2002        | 1.0<br>(0.98–1.02)  |
| Rhode Island     | 2003        | 1.0<br>(0.98–1.02)  |
| Rhode Island     | 2004        | 1.0<br>(0.98–1.01)  |
| Rhode Island     | 2005        | 1.0<br>(0.99–1.01)  |
| Rhode Island     | 2006        | 1.0<br>(0.98–1.02)  |
| Rhode Island     | 2007        | 1.01<br>(0.99–1.02) |
| Rhode Island     | 2008        | 1.0<br>(0.99–1.02)  |
| Rhode Island     | 2009        | 1.0<br>(0.98–1.01)  |
| Rhode Island     | 2010        | 0.99<br>(0.97–1.01) |

**Table 15 Ratio of adjusted to unadjusted 5q0 values for scaled locations by year**

| <b>Geography</b> | <b>Year</b> | <b>Ratio</b>        |
|------------------|-------------|---------------------|
| Rhode Island     | 2011        | 1.0<br>(0.98–1.02)  |
| Rhode Island     | 2012        | 1.0<br>(0.98–1.02)  |
| Rhode Island     | 2013        | 1.0<br>(0.98–1.02)  |
| Rhode Island     | 2014        | 1.0<br>(0.98–1.02)  |
| Rhode Island     | 2015        | 1.0<br>(0.98–1.03)  |
| Rhode Island     | 2016        | 1.03<br>(0.93–1.13) |
| Rhode Island     | 2017        | 1.02<br>(0.87–1.18) |
| South Carolina   | 1950        | 0.81<br>(0.67–0.97) |
| South Carolina   | 1951        | 0.86<br>(0.71–1.01) |
| South Carolina   | 1952        | 0.87<br>(0.74–1.02) |
| South Carolina   | 1953        | 0.87<br>(0.73–1.02) |
| South Carolina   | 1954        | 0.86<br>(0.72–1.0)  |
| South Carolina   | 1955        | 0.87<br>(0.73–1.01) |
| South Carolina   | 1956        | 0.89<br>(0.77–1.02) |
| South Carolina   | 1957        | 0.93<br>(0.83–1.03) |
| South Carolina   | 1958        | 0.96<br>(0.91–1.02) |
| South Carolina   | 1959        | 1.0<br>(0.99–1.01)  |
| South Carolina   | 1960        | 1.0<br>(0.99–1.01)  |
| South Carolina   | 1961        | 1.0<br>(0.99–1.01)  |
| South Carolina   | 1962        | 1.0<br>(0.99–1.01)  |
| South Carolina   | 1963        | 1.01<br>(0.99–1.02) |
| South Carolina   | 1964        | 1.0<br>(0.99–1.01)  |
| South Carolina   | 1965        | 1.0<br>(0.98–1.02)  |
| South Carolina   | 1966        | 1.0<br>(0.98–1.02)  |
| South Carolina   | 1967        | 1.0<br>(0.98–1.01)  |
| South Carolina   | 1968        | 1.0<br>(0.98–1.01)  |
| South Carolina   | 1969        | 1.0<br>(0.99–1.02)  |
| South Carolina   | 1970        | 1.01<br>(0.99–1.02) |
| South Carolina   | 1971        | 1.0<br>(0.98–1.01)  |
| South Carolina   | 1972        | 1.0<br>(0.99–1.01)  |
| South Carolina   | 1973        | 1.0<br>(0.99–1.02)  |

**Table 15 Ratio of adjusted to unadjusted 5q0 values for scaled locations by year**

| <b>Geography</b> | <b>Year</b> | <b>Ratio</b>        |
|------------------|-------------|---------------------|
| South Carolina   | 1974        | 1.0<br>(0.99–1.02)  |
| South Carolina   | 1975        | 1.0<br>(0.98–1.01)  |
| South Carolina   | 1976        | 1.0<br>(0.99–1.02)  |
| South Carolina   | 1977        | 1.0<br>(0.98–1.01)  |
| South Carolina   | 1978        | 1.0<br>(0.99–1.01)  |
| South Carolina   | 1979        | 1.0<br>(0.99–1.01)  |
| South Carolina   | 1980        | 1.0<br>(0.99–1.01)  |
| South Carolina   | 1981        | 1.0<br>(0.98–1.01)  |
| South Carolina   | 1982        | 1.0<br>(0.99–1.01)  |
| South Carolina   | 1983        | 1.0<br>(0.98–1.01)  |
| South Carolina   | 1984        | 1.0<br>(0.98–1.01)  |
| South Carolina   | 1985        | 1.0<br>(0.99–1.02)  |
| South Carolina   | 1986        | 1.0<br>(0.99–1.01)  |
| South Carolina   | 1987        | 1.0<br>(0.99–1.01)  |
| South Carolina   | 1988        | 1.0<br>(0.99–1.02)  |
| South Carolina   | 1989        | 1.01<br>(0.99–1.02) |
| South Carolina   | 1990        | 1.0<br>(0.98–1.01)  |
| South Carolina   | 1991        | 1.0<br>(0.99–1.01)  |
| South Carolina   | 1992        | 0.99<br>(0.98–1.01) |
| South Carolina   | 1993        | 1.0<br>(0.99–1.02)  |
| South Carolina   | 1994        | 1.0<br>(0.99–1.02)  |
| South Carolina   | 1995        | 0.99<br>(0.98–1.01) |
| South Carolina   | 1996        | 1.0<br>(0.98–1.01)  |
| South Carolina   | 1997        | 1.0<br>(0.98–1.02)  |
| South Carolina   | 1998        | 1.01<br>(0.99–1.02) |
| South Carolina   | 1999        | 1.0<br>(0.99–1.01)  |
| South Carolina   | 2000        | 1.0<br>(0.99–1.01)  |
| South Carolina   | 2001        | 0.99<br>(0.98–1.01) |
| South Carolina   | 2002        | 1.0<br>(0.98–1.02)  |
| South Carolina   | 2003        | 1.0<br>(0.98–1.02)  |
| South Carolina   | 2004        | 1.0<br>(0.98–1.01)  |

**Table 15 Ratio of adjusted to unadjusted 5q0 values for scaled locations by year**

| <b>Geography</b> | <b>Year</b> | <b>Ratio</b>        |
|------------------|-------------|---------------------|
| South Carolina   | 2005        | 1.0<br>(0.99–1.01)  |
| South Carolina   | 2006        | 1.0<br>(0.98–1.02)  |
| South Carolina   | 2007        | 1.01<br>(0.99–1.02) |
| South Carolina   | 2008        | 1.0<br>(0.99–1.02)  |
| South Carolina   | 2009        | 1.0<br>(0.98–1.01)  |
| South Carolina   | 2010        | 0.99<br>(0.97–1.01) |
| South Carolina   | 2011        | 1.0<br>(0.98–1.02)  |
| South Carolina   | 2012        | 1.0<br>(0.98–1.02)  |
| South Carolina   | 2013        | 1.0<br>(0.98–1.02)  |
| South Carolina   | 2014        | 1.0<br>(0.98–1.02)  |
| South Carolina   | 2015        | 1.0<br>(0.98–1.03)  |
| South Carolina   | 2016        | 1.03<br>(0.93–1.13) |
| South Carolina   | 2017        | 1.02<br>(0.87–1.18) |
| South Dakota     | 1950        | 0.81<br>(0.67–0.97) |
| South Dakota     | 1951        | 0.86<br>(0.71–1.01) |
| South Dakota     | 1952        | 0.87<br>(0.74–1.02) |
| South Dakota     | 1953        | 0.87<br>(0.73–1.02) |
| South Dakota     | 1954        | 0.85<br>(0.71–1.0)  |
| South Dakota     | 1955        | 0.87<br>(0.73–1.01) |
| South Dakota     | 1956        | 0.89<br>(0.77–1.02) |
| South Dakota     | 1957        | 0.93<br>(0.83–1.03) |
| South Dakota     | 1958        | 0.96<br>(0.91–1.02) |
| South Dakota     | 1959        | 1.0<br>(0.99–1.01)  |
| South Dakota     | 1960        | 1.0<br>(0.99–1.01)  |
| South Dakota     | 1961        | 1.0<br>(0.99–1.01)  |
| South Dakota     | 1962        | 1.0<br>(0.99–1.01)  |
| South Dakota     | 1963        | 1.01<br>(0.99–1.02) |
| South Dakota     | 1964        | 1.0<br>(0.99–1.01)  |
| South Dakota     | 1965        | 1.0<br>(0.98–1.02)  |
| South Dakota     | 1966        | 1.0<br>(0.98–1.02)  |
| South Dakota     | 1967        | 1.0<br>(0.98–1.01)  |



**Table 15 Ratio of adjusted to unadjusted 5q0 values for scaled locations by year**

| <b>Geography</b> | <b>Year</b> | <b>Ratio</b>        |
|------------------|-------------|---------------------|
| South Dakota     | 1968        | 1.0<br>(0.98–1.01)  |
| South Dakota     | 1969        | 1.0<br>(0.99–1.02)  |
| South Dakota     | 1970        | 1.01<br>(0.99–1.02) |
| South Dakota     | 1971        | 1.0<br>(0.98–1.01)  |
| South Dakota     | 1972        | 1.0<br>(0.99–1.01)  |
| South Dakota     | 1973        | 1.0<br>(0.99–1.02)  |
| South Dakota     | 1974        | 1.0<br>(0.99–1.02)  |
| South Dakota     | 1975        | 1.0<br>(0.98–1.01)  |
| South Dakota     | 1976        | 1.0<br>(0.99–1.02)  |
| South Dakota     | 1977        | 1.0<br>(0.98–1.01)  |
| South Dakota     | 1978        | 1.0<br>(0.99–1.01)  |
| South Dakota     | 1979        | 1.0<br>(0.99–1.01)  |
| South Dakota     | 1980        | 1.0<br>(0.99–1.01)  |
| South Dakota     | 1981        | 1.0<br>(0.98–1.01)  |
| South Dakota     | 1982        | 1.0<br>(0.99–1.01)  |
| South Dakota     | 1983        | 1.0<br>(0.98–1.01)  |
| South Dakota     | 1984        | 1.0<br>(0.98–1.01)  |
| South Dakota     | 1985        | 1.0<br>(0.99–1.02)  |
| South Dakota     | 1986        | 1.0<br>(0.99–1.01)  |
| South Dakota     | 1987        | 1.0<br>(0.99–1.01)  |
| South Dakota     | 1988        | 1.0<br>(0.99–1.02)  |
| South Dakota     | 1989        | 1.01<br>(0.99–1.02) |
| South Dakota     | 1990        | 1.0<br>(0.98–1.01)  |
| South Dakota     | 1991        | 1.0<br>(0.99–1.01)  |
| South Dakota     | 1992        | 0.99<br>(0.98–1.01) |
| South Dakota     | 1993        | 1.0<br>(0.99–1.02)  |
| South Dakota     | 1994        | 1.0<br>(0.99–1.02)  |
| South Dakota     | 1995        | 0.99<br>(0.98–1.01) |
| South Dakota     | 1996        | 1.0<br>(0.98–1.01)  |
| South Dakota     | 1997        | 1.0<br>(0.98–1.02)  |
| South Dakota     | 1998        | 1.01<br>(0.99–1.02) |

**Table 15 Ratio of adjusted to unadjusted 5q0 values for scaled locations by year**

| <b>Geography</b> | <b>Year</b> | <b>Ratio</b>        |
|------------------|-------------|---------------------|
| South Dakota     | 1999        | 1.0<br>(0.99–1.01)  |
| South Dakota     | 2000        | 1.0<br>(0.99–1.01)  |
| South Dakota     | 2001        | 0.99<br>(0.98–1.01) |
| South Dakota     | 2002        | 1.0<br>(0.98–1.02)  |
| South Dakota     | 2003        | 1.0<br>(0.98–1.02)  |
| South Dakota     | 2004        | 1.0<br>(0.98–1.01)  |
| South Dakota     | 2005        | 1.0<br>(0.99–1.01)  |
| South Dakota     | 2006        | 1.0<br>(0.98–1.02)  |
| South Dakota     | 2007        | 1.01<br>(0.99–1.02) |
| South Dakota     | 2008        | 1.0<br>(0.99–1.02)  |
| South Dakota     | 2009        | 1.0<br>(0.98–1.01)  |
| South Dakota     | 2010        | 0.99<br>(0.97–1.01) |
| South Dakota     | 2011        | 1.0<br>(0.98–1.02)  |
| South Dakota     | 2012        | 1.0<br>(0.98–1.02)  |
| South Dakota     | 2013        | 1.0<br>(0.98–1.02)  |
| South Dakota     | 2014        | 1.0<br>(0.98–1.02)  |
| South Dakota     | 2015        | 1.0<br>(0.98–1.03)  |
| South Dakota     | 2016        | 1.03<br>(0.93–1.13) |
| South Dakota     | 2017        | 1.02<br>(0.87–1.18) |
| Tennessee        | 1950        | 0.81<br>(0.67–0.97) |
| Tennessee        | 1951        | 0.86<br>(0.71–1.01) |
| Tennessee        | 1952        | 0.87<br>(0.74–1.02) |
| Tennessee        | 1953        | 0.87<br>(0.73–1.02) |
| Tennessee        | 1954        | 0.85<br>(0.71–1.0)  |
| Tennessee        | 1955        | 0.87<br>(0.73–1.01) |
| Tennessee        | 1956        | 0.89<br>(0.77–1.02) |
| Tennessee        | 1957        | 0.93<br>(0.83–1.03) |
| Tennessee        | 1958        | 0.96<br>(0.91–1.02) |
| Tennessee        | 1959        | 1.0<br>(0.99–1.01)  |
| Tennessee        | 1960        | 1.0<br>(0.99–1.01)  |
| Tennessee        | 1961        | 1.0<br>(0.99–1.01)  |

**Table 15 Ratio of adjusted to unadjusted 5q0 values for scaled locations by year**

| <b>Geography</b> | <b>Year</b> | <b>Ratio</b>        |
|------------------|-------------|---------------------|
| Tennessee        | 1962        | 1.0<br>(0.99–1.01)  |
| Tennessee        | 1963        | 1.01<br>(0.99–1.02) |
| Tennessee        | 1964        | 1.0<br>(0.99–1.01)  |
| Tennessee        | 1965        | 1.0<br>(0.98–1.02)  |
| Tennessee        | 1966        | 1.0<br>(0.98–1.02)  |
| Tennessee        | 1967        | 1.0<br>(0.98–1.01)  |
| Tennessee        | 1968        | 1.0<br>(0.98–1.01)  |
| Tennessee        | 1969        | 1.0<br>(0.99–1.02)  |
| Tennessee        | 1970        | 1.01<br>(0.99–1.02) |
| Tennessee        | 1971        | 1.0<br>(0.98–1.01)  |
| Tennessee        | 1972        | 1.0<br>(0.99–1.01)  |
| Tennessee        | 1973        | 1.0<br>(0.99–1.02)  |
| Tennessee        | 1974        | 1.0<br>(0.99–1.02)  |
| Tennessee        | 1975        | 1.0<br>(0.98–1.01)  |
| Tennessee        | 1976        | 1.0<br>(0.99–1.02)  |
| Tennessee        | 1977        | 1.0<br>(0.98–1.01)  |
| Tennessee        | 1978        | 1.0<br>(0.99–1.01)  |
| Tennessee        | 1979        | 1.0<br>(0.99–1.01)  |
| Tennessee        | 1980        | 1.0<br>(0.99–1.01)  |
| Tennessee        | 1981        | 1.0<br>(0.98–1.01)  |
| Tennessee        | 1982        | 1.0<br>(0.99–1.01)  |
| Tennessee        | 1983        | 1.0<br>(0.98–1.01)  |
| Tennessee        | 1984        | 1.0<br>(0.98–1.01)  |
| Tennessee        | 1985        | 1.0<br>(0.99–1.02)  |
| Tennessee        | 1986        | 1.0<br>(0.99–1.01)  |
| Tennessee        | 1987        | 1.0<br>(0.99–1.01)  |
| Tennessee        | 1988        | 1.0<br>(0.99–1.02)  |
| Tennessee        | 1989        | 1.01<br>(0.99–1.02) |
| Tennessee        | 1990        | 1.0<br>(0.98–1.01)  |
| Tennessee        | 1991        | 1.0<br>(0.99–1.01)  |
| Tennessee        | 1992        | 0.99<br>(0.98–1.01) |

**Table 15 Ratio of adjusted to unadjusted 5q0 values for scaled locations by year**

| <b>Geography</b> | <b>Year</b> | <b>Ratio</b>        |
|------------------|-------------|---------------------|
| Tennessee        | 1993        | 1.0<br>(0.99–1.02)  |
| Tennessee        | 1994        | 1.0<br>(0.99–1.02)  |
| Tennessee        | 1995        | 0.99<br>(0.98–1.01) |
| Tennessee        | 1996        | 1.0<br>(0.98–1.01)  |
| Tennessee        | 1997        | 1.0<br>(0.98–1.02)  |
| Tennessee        | 1998        | 1.01<br>(0.99–1.02) |
| Tennessee        | 1999        | 1.0<br>(0.99–1.01)  |
| Tennessee        | 2000        | 1.0<br>(0.99–1.01)  |
| Tennessee        | 2001        | 0.99<br>(0.98–1.01) |
| Tennessee        | 2002        | 1.0<br>(0.98–1.02)  |
| Tennessee        | 2003        | 1.0<br>(0.98–1.02)  |
| Tennessee        | 2004        | 1.0<br>(0.98–1.01)  |
| Tennessee        | 2005        | 1.0<br>(0.99–1.01)  |
| Tennessee        | 2006        | 1.0<br>(0.98–1.02)  |
| Tennessee        | 2007        | 1.01<br>(0.99–1.02) |
| Tennessee        | 2008        | 1.0<br>(0.99–1.02)  |
| Tennessee        | 2009        | 1.0<br>(0.98–1.01)  |
| Tennessee        | 2010        | 0.99<br>(0.97–1.01) |
| Tennessee        | 2011        | 1.0<br>(0.98–1.02)  |
| Tennessee        | 2012        | 1.0<br>(0.98–1.02)  |
| Tennessee        | 2013        | 1.0<br>(0.98–1.02)  |
| Tennessee        | 2014        | 1.0<br>(0.98–1.02)  |
| Tennessee        | 2015        | 1.0<br>(0.98–1.03)  |
| Tennessee        | 2016        | 1.03<br>(0.93–1.13) |
| Tennessee        | 2017        | 1.02<br>(0.87–1.18) |
| Texas            | 1950        | 0.81<br>(0.67–0.97) |
| Texas            | 1951        | 0.86<br>(0.71–1.01) |
| Texas            | 1952        | 0.87<br>(0.74–1.02) |
| Texas            | 1953        | 0.87<br>(0.73–1.02) |
| Texas            | 1954        | 0.85<br>(0.71–1.0)  |
| Texas            | 1955        | 0.87<br>(0.73–1.01) |

**Table 15 Ratio of adjusted to unadjusted 5q0 values for scaled locations by year**

| <b>Geography</b> | <b>Year</b> | <b>Ratio</b>        |
|------------------|-------------|---------------------|
| Texas            | 1956        | 0.89<br>(0.77–1.02) |
| Texas            | 1957        | 0.93<br>(0.83–1.03) |
| Texas            | 1958        | 0.96<br>(0.91–1.02) |
| Texas            | 1959        | 1.0<br>(0.99–1.01)  |
| Texas            | 1960        | 1.0<br>(0.99–1.01)  |
| Texas            | 1961        | 1.0<br>(0.99–1.01)  |
| Texas            | 1962        | 1.0<br>(0.99–1.01)  |
| Texas            | 1963        | 1.01<br>(0.99–1.02) |
| Texas            | 1964        | 1.0<br>(0.99–1.01)  |
| Texas            | 1965        | 1.0<br>(0.98–1.02)  |
| Texas            | 1966        | 1.0<br>(0.98–1.02)  |
| Texas            | 1967        | 1.0<br>(0.98–1.01)  |
| Texas            | 1968        | 1.0<br>(0.98–1.01)  |
| Texas            | 1969        | 1.0<br>(0.99–1.02)  |
| Texas            | 1970        | 1.01<br>(0.99–1.02) |
| Texas            | 1971        | 1.0<br>(0.98–1.01)  |
| Texas            | 1972        | 1.0<br>(0.99–1.01)  |
| Texas            | 1973        | 1.0<br>(0.99–1.02)  |
| Texas            | 1974        | 1.0<br>(0.99–1.02)  |
| Texas            | 1975        | 1.0<br>(0.98–1.01)  |
| Texas            | 1976        | 1.0<br>(0.99–1.02)  |
| Texas            | 1977        | 1.0<br>(0.98–1.01)  |
| Texas            | 1978        | 1.0<br>(0.99–1.01)  |
| Texas            | 1979        | 1.0<br>(0.99–1.01)  |
| Texas            | 1980        | 1.0<br>(0.99–1.01)  |
| Texas            | 1981        | 1.0<br>(0.98–1.01)  |
| Texas            | 1982        | 1.0<br>(0.99–1.01)  |
| Texas            | 1983        | 1.0<br>(0.98–1.01)  |
| Texas            | 1984        | 1.0<br>(0.98–1.01)  |
| Texas            | 1985        | 1.0<br>(0.99–1.02)  |
| Texas            | 1986        | 1.0<br>(0.99–1.01)  |

**Table 15 Ratio of adjusted to unadjusted 5q0 values for scaled locations by year**

| <b>Geography</b> | <b>Year</b> | <b>Ratio</b>        |
|------------------|-------------|---------------------|
| Texas            | 1987        | 1.0<br>(0.99–1.01)  |
| Texas            | 1988        | 1.0<br>(0.99–1.02)  |
| Texas            | 1989        | 1.01<br>(0.99–1.02) |
| Texas            | 1990        | 1.0<br>(0.98–1.01)  |
| Texas            | 1991        | 1.0<br>(0.99–1.01)  |
| Texas            | 1992        | 0.99<br>(0.98–1.01) |
| Texas            | 1993        | 1.0<br>(0.99–1.02)  |
| Texas            | 1994        | 1.0<br>(0.99–1.02)  |
| Texas            | 1995        | 0.99<br>(0.98–1.01) |
| Texas            | 1996        | 1.0<br>(0.98–1.01)  |
| Texas            | 1997        | 1.0<br>(0.98–1.02)  |
| Texas            | 1998        | 1.01<br>(0.99–1.02) |
| Texas            | 1999        | 1.0<br>(0.99–1.01)  |
| Texas            | 2000        | 1.0<br>(0.99–1.01)  |
| Texas            | 2001        | 0.99<br>(0.98–1.01) |
| Texas            | 2002        | 1.0<br>(0.98–1.02)  |
| Texas            | 2003        | 1.0<br>(0.98–1.02)  |
| Texas            | 2004        | 1.0<br>(0.98–1.01)  |
| Texas            | 2005        | 1.0<br>(0.99–1.01)  |
| Texas            | 2006        | 1.0<br>(0.98–1.02)  |
| Texas            | 2007        | 1.01<br>(0.99–1.02) |
| Texas            | 2008        | 1.0<br>(0.99–1.02)  |
| Texas            | 2009        | 1.0<br>(0.98–1.01)  |
| Texas            | 2010        | 0.99<br>(0.97–1.01) |
| Texas            | 2011        | 1.0<br>(0.98–1.02)  |
| Texas            | 2012        | 1.0<br>(0.98–1.02)  |
| Texas            | 2013        | 1.0<br>(0.98–1.02)  |
| Texas            | 2014        | 1.0<br>(0.98–1.02)  |
| Texas            | 2015        | 1.0<br>(0.98–1.03)  |
| Texas            | 2016        | 1.03<br>(0.93–1.13) |
| Texas            | 2017        | 1.02<br>(0.87–1.18) |

**Table 15 Ratio of adjusted to unadjusted 5q0 values for scaled locations by year**

| <b>Geography</b> | <b>Year</b> | <b>Ratio</b>        |
|------------------|-------------|---------------------|
| Utah             | 1950        | 0.81<br>(0.67–0.97) |
| Utah             | 1951        | 0.85<br>(0.71–1.01) |
| Utah             | 1952        | 0.87<br>(0.73–1.02) |
| Utah             | 1953        | 0.87<br>(0.73–1.02) |
| Utah             | 1954        | 0.85<br>(0.71–1.0)  |
| Utah             | 1955        | 0.87<br>(0.73–1.01) |
| Utah             | 1956        | 0.89<br>(0.77–1.02) |
| Utah             | 1957        | 0.92<br>(0.83–1.03) |
| Utah             | 1958        | 0.96<br>(0.9–1.02)  |
| Utah             | 1959        | 1.0<br>(0.99–1.01)  |
| Utah             | 1960        | 1.0<br>(0.99–1.01)  |
| Utah             | 1961        | 1.0<br>(0.99–1.01)  |
| Utah             | 1962        | 1.0<br>(0.99–1.01)  |
| Utah             | 1963        | 1.01<br>(0.99–1.02) |
| Utah             | 1964        | 1.0<br>(0.99–1.01)  |
| Utah             | 1965        | 1.0<br>(0.98–1.02)  |
| Utah             | 1966        | 1.0<br>(0.98–1.02)  |
| Utah             | 1967        | 1.0<br>(0.98–1.01)  |
| Utah             | 1968        | 1.0<br>(0.98–1.01)  |
| Utah             | 1969        | 1.0<br>(0.99–1.02)  |
| Utah             | 1970        | 1.01<br>(0.99–1.02) |
| Utah             | 1971        | 1.0<br>(0.98–1.01)  |
| Utah             | 1972        | 1.0<br>(0.99–1.01)  |
| Utah             | 1973        | 1.0<br>(0.99–1.02)  |
| Utah             | 1974        | 1.0<br>(0.99–1.02)  |
| Utah             | 1975        | 1.0<br>(0.98–1.01)  |
| Utah             | 1976        | 1.0<br>(0.99–1.02)  |
| Utah             | 1977        | 1.0<br>(0.98–1.01)  |
| Utah             | 1978        | 1.0<br>(0.99–1.01)  |
| Utah             | 1979        | 1.0<br>(0.99–1.01)  |
| Utah             | 1980        | 1.0<br>(0.99–1.01)  |

**Table 15 Ratio of adjusted to unadjusted 5q0 values for scaled locations by year**

| <b>Geography</b> | <b>Year</b> | <b>Ratio</b>        |
|------------------|-------------|---------------------|
| Utah             | 1981        | 1.0<br>(0.98–1.01)  |
| Utah             | 1982        | 1.0<br>(0.99–1.01)  |
| Utah             | 1983        | 1.0<br>(0.98–1.01)  |
| Utah             | 1984        | 1.0<br>(0.98–1.01)  |
| Utah             | 1985        | 1.0<br>(0.99–1.02)  |
| Utah             | 1986        | 1.0<br>(0.99–1.01)  |
| Utah             | 1987        | 1.0<br>(0.99–1.01)  |
| Utah             | 1988        | 1.0<br>(0.99–1.02)  |
| Utah             | 1989        | 1.01<br>(0.99–1.02) |
| Utah             | 1990        | 1.0<br>(0.98–1.01)  |
| Utah             | 1991        | 1.0<br>(0.99–1.01)  |
| Utah             | 1992        | 0.99<br>(0.98–1.01) |
| Utah             | 1993        | 1.0<br>(0.99–1.02)  |
| Utah             | 1994        | 1.0<br>(0.99–1.02)  |
| Utah             | 1995        | 0.99<br>(0.98–1.01) |
| Utah             | 1996        | 1.0<br>(0.98–1.01)  |
| Utah             | 1997        | 1.0<br>(0.98–1.02)  |
| Utah             | 1998        | 1.01<br>(0.99–1.02) |
| Utah             | 1999        | 1.0<br>(0.99–1.01)  |
| Utah             | 2000        | 1.0<br>(0.99–1.01)  |
| Utah             | 2001        | 0.99<br>(0.98–1.01) |
| Utah             | 2002        | 1.0<br>(0.98–1.02)  |
| Utah             | 2003        | 1.0<br>(0.98–1.02)  |
| Utah             | 2004        | 1.0<br>(0.98–1.01)  |
| Utah             | 2005        | 1.0<br>(0.99–1.01)  |
| Utah             | 2006        | 1.0<br>(0.98–1.02)  |
| Utah             | 2007        | 1.01<br>(0.99–1.02) |
| Utah             | 2008        | 1.0<br>(0.99–1.02)  |
| Utah             | 2009        | 1.0<br>(0.98–1.01)  |
| Utah             | 2010        | 0.99<br>(0.97–1.01) |
| Utah             | 2011        | 1.0<br>(0.98–1.02)  |



**Table 15 Ratio of adjusted to unadjusted 5q0 values for scaled locations by year**

| <b>Geography</b> | <b>Year</b> | <b>Ratio</b>        |
|------------------|-------------|---------------------|
| Utah             | 2012        | 1.0<br>(0.98–1.02)  |
| Utah             | 2013        | 1.0<br>(0.98–1.02)  |
| Utah             | 2014        | 1.0<br>(0.98–1.02)  |
| Utah             | 2015        | 1.0<br>(0.98–1.03)  |
| Utah             | 2016        | 1.03<br>(0.93–1.13) |
| Utah             | 2017        | 1.02<br>(0.87–1.18) |
| Vermont          | 1950        | 0.81<br>(0.67–0.97) |
| Vermont          | 1951        | 0.86<br>(0.71–1.01) |
| Vermont          | 1952        | 0.87<br>(0.74–1.02) |
| Vermont          | 1953        | 0.87<br>(0.73–1.02) |
| Vermont          | 1954        | 0.85<br>(0.71–1.0)  |
| Vermont          | 1955        | 0.87<br>(0.73–1.01) |
| Vermont          | 1956        | 0.89<br>(0.77–1.02) |
| Vermont          | 1957        | 0.93<br>(0.83–1.03) |
| Vermont          | 1958        | 0.96<br>(0.9–1.02)  |
| Vermont          | 1959        | 1.0<br>(0.99–1.01)  |
| Vermont          | 1960        | 1.0<br>(0.99–1.01)  |
| Vermont          | 1961        | 1.0<br>(0.99–1.01)  |
| Vermont          | 1962        | 1.0<br>(0.99–1.01)  |
| Vermont          | 1963        | 1.01<br>(0.99–1.02) |
| Vermont          | 1964        | 1.0<br>(0.99–1.01)  |
| Vermont          | 1965        | 1.0<br>(0.98–1.02)  |
| Vermont          | 1966        | 1.0<br>(0.98–1.02)  |
| Vermont          | 1967        | 1.0<br>(0.98–1.01)  |
| Vermont          | 1968        | 1.0<br>(0.98–1.01)  |
| Vermont          | 1969        | 1.0<br>(0.99–1.02)  |
| Vermont          | 1970        | 1.01<br>(0.99–1.02) |
| Vermont          | 1971        | 1.0<br>(0.98–1.01)  |
| Vermont          | 1972        | 1.0<br>(0.99–1.01)  |
| Vermont          | 1973        | 1.0<br>(0.99–1.02)  |
| Vermont          | 1974        | 1.0<br>(0.99–1.02)  |

**Table 15 Ratio of adjusted to unadjusted 5q0 values for scaled locations by year**

| <b>Geography</b> | <b>Year</b> | <b>Ratio</b>        |
|------------------|-------------|---------------------|
| Vermont          | 1975        | 1.0<br>(0.98–1.01)  |
| Vermont          | 1976        | 1.0<br>(0.99–1.02)  |
| Vermont          | 1977        | 1.0<br>(0.98–1.01)  |
| Vermont          | 1978        | 1.0<br>(0.99–1.01)  |
| Vermont          | 1979        | 1.0<br>(0.99–1.01)  |
| Vermont          | 1980        | 1.0<br>(0.99–1.01)  |
| Vermont          | 1981        | 1.0<br>(0.98–1.01)  |
| Vermont          | 1982        | 1.0<br>(0.99–1.01)  |
| Vermont          | 1983        | 1.0<br>(0.98–1.01)  |
| Vermont          | 1984        | 1.0<br>(0.98–1.01)  |
| Vermont          | 1985        | 1.0<br>(0.99–1.02)  |
| Vermont          | 1986        | 1.0<br>(0.99–1.01)  |
| Vermont          | 1987        | 1.0<br>(0.99–1.01)  |
| Vermont          | 1988        | 1.0<br>(0.99–1.02)  |
| Vermont          | 1989        | 1.01<br>(0.99–1.02) |
| Vermont          | 1990        | 1.0<br>(0.98–1.01)  |
| Vermont          | 1991        | 1.0<br>(0.99–1.01)  |
| Vermont          | 1992        | 0.99<br>(0.98–1.01) |
| Vermont          | 1993        | 1.0<br>(0.99–1.02)  |
| Vermont          | 1994        | 1.0<br>(0.99–1.02)  |
| Vermont          | 1995        | 0.99<br>(0.98–1.01) |
| Vermont          | 1996        | 1.0<br>(0.98–1.01)  |
| Vermont          | 1997        | 1.0<br>(0.98–1.02)  |
| Vermont          | 1998        | 1.01<br>(0.99–1.02) |
| Vermont          | 1999        | 1.0<br>(0.99–1.01)  |
| Vermont          | 2000        | 1.0<br>(0.99–1.01)  |
| Vermont          | 2001        | 0.99<br>(0.98–1.01) |
| Vermont          | 2002        | 1.0<br>(0.98–1.02)  |
| Vermont          | 2003        | 1.0<br>(0.98–1.02)  |
| Vermont          | 2004        | 1.0<br>(0.98–1.01)  |
| Vermont          | 2005        | 1.0<br>(0.99–1.01)  |

**Table 15 Ratio of adjusted to unadjusted 5q0 values for scaled locations by year**

| <b>Geography</b> | <b>Year</b> | <b>Ratio</b>        |
|------------------|-------------|---------------------|
| Vermont          | 2006        | 1.0<br>(0.98–1.02)  |
| Vermont          | 2007        | 1.01<br>(0.99–1.02) |
| Vermont          | 2008        | 1.0<br>(0.99–1.02)  |
| Vermont          | 2009        | 1.0<br>(0.98–1.01)  |
| Vermont          | 2010        | 0.99<br>(0.97–1.01) |
| Vermont          | 2011        | 1.0<br>(0.98–1.02)  |
| Vermont          | 2012        | 1.0<br>(0.98–1.02)  |
| Vermont          | 2013        | 1.0<br>(0.98–1.02)  |
| Vermont          | 2014        | 1.0<br>(0.98–1.02)  |
| Vermont          | 2015        | 1.0<br>(0.98–1.03)  |
| Vermont          | 2016        | 1.03<br>(0.93–1.13) |
| Vermont          | 2017        | 1.02<br>(0.87–1.18) |
| Virginia         | 1950        | 0.81<br>(0.67–0.97) |
| Virginia         | 1951        | 0.86<br>(0.71–1.01) |
| Virginia         | 1952        | 0.87<br>(0.74–1.02) |
| Virginia         | 1953        | 0.87<br>(0.73–1.02) |
| Virginia         | 1954        | 0.85<br>(0.71–1.0)  |
| Virginia         | 1955        | 0.87<br>(0.73–1.01) |
| Virginia         | 1956        | 0.89<br>(0.77–1.02) |
| Virginia         | 1957        | 0.93<br>(0.83–1.03) |
| Virginia         | 1958        | 0.96<br>(0.91–1.02) |
| Virginia         | 1959        | 1.0<br>(0.99–1.01)  |
| Virginia         | 1960        | 1.0<br>(0.99–1.01)  |
| Virginia         | 1961        | 1.0<br>(0.99–1.01)  |
| Virginia         | 1962        | 1.0<br>(0.99–1.01)  |
| Virginia         | 1963        | 1.01<br>(0.99–1.02) |
| Virginia         | 1964        | 1.0<br>(0.99–1.01)  |
| Virginia         | 1965        | 1.0<br>(0.98–1.02)  |
| Virginia         | 1966        | 1.0<br>(0.98–1.02)  |
| Virginia         | 1967        | 1.0<br>(0.98–1.01)  |
| Virginia         | 1968        | 1.0<br>(0.98–1.01)  |

**Table 15 Ratio of adjusted to unadjusted 5q0 values for scaled locations by year**

| <b>Geography</b> | <b>Year</b> | <b>Ratio</b>        |
|------------------|-------------|---------------------|
| Virginia         | 1969        | 1.0<br>(0.99–1.02)  |
| Virginia         | 1970        | 1.01<br>(0.99–1.02) |
| Virginia         | 1971        | 1.0<br>(0.98–1.01)  |
| Virginia         | 1972        | 1.0<br>(0.99–1.01)  |
| Virginia         | 1973        | 1.0<br>(0.99–1.02)  |
| Virginia         | 1974        | 1.0<br>(0.99–1.02)  |
| Virginia         | 1975        | 1.0<br>(0.98–1.01)  |
| Virginia         | 1976        | 1.0<br>(0.99–1.02)  |
| Virginia         | 1977        | 1.0<br>(0.98–1.01)  |
| Virginia         | 1978        | 1.0<br>(0.99–1.01)  |
| Virginia         | 1979        | 1.0<br>(0.99–1.01)  |
| Virginia         | 1980        | 1.0<br>(0.99–1.01)  |
| Virginia         | 1981        | 1.0<br>(0.98–1.01)  |
| Virginia         | 1982        | 1.0<br>(0.99–1.01)  |
| Virginia         | 1983        | 1.0<br>(0.98–1.01)  |
| Virginia         | 1984        | 1.0<br>(0.98–1.01)  |
| Virginia         | 1985        | 1.0<br>(0.99–1.02)  |
| Virginia         | 1986        | 1.0<br>(0.99–1.01)  |
| Virginia         | 1987        | 1.0<br>(0.99–1.01)  |
| Virginia         | 1988        | 1.0<br>(0.99–1.02)  |
| Virginia         | 1989        | 1.01<br>(0.99–1.02) |
| Virginia         | 1990        | 1.0<br>(0.98–1.01)  |
| Virginia         | 1991        | 1.0<br>(0.99–1.01)  |
| Virginia         | 1992        | 0.99<br>(0.98–1.01) |
| Virginia         | 1993        | 1.0<br>(0.99–1.02)  |
| Virginia         | 1994        | 1.0<br>(0.99–1.02)  |
| Virginia         | 1995        | 0.99<br>(0.98–1.01) |
| Virginia         | 1996        | 1.0<br>(0.98–1.01)  |
| Virginia         | 1997        | 1.0<br>(0.98–1.02)  |
| Virginia         | 1998        | 1.01<br>(0.99–1.02) |
| Virginia         | 1999        | 1.0<br>(0.99–1.01)  |

**Table 15 Ratio of adjusted to unadjusted 5q0 values for scaled locations by year**

| <b>Geography</b> | <b>Year</b> | <b>Ratio</b>        |
|------------------|-------------|---------------------|
| Virginia         | 2000        | 1.0<br>(0.99–1.01)  |
| Virginia         | 2001        | 0.99<br>(0.98–1.01) |
| Virginia         | 2002        | 1.0<br>(0.98–1.02)  |
| Virginia         | 2003        | 1.0<br>(0.98–1.02)  |
| Virginia         | 2004        | 1.0<br>(0.98–1.01)  |
| Virginia         | 2005        | 1.0<br>(0.99–1.01)  |
| Virginia         | 2006        | 1.0<br>(0.98–1.02)  |
| Virginia         | 2007        | 1.01<br>(0.99–1.02) |
| Virginia         | 2008        | 1.0<br>(0.99–1.02)  |
| Virginia         | 2009        | 1.0<br>(0.98–1.01)  |
| Virginia         | 2010        | 0.99<br>(0.97–1.01) |
| Virginia         | 2011        | 1.0<br>(0.98–1.02)  |
| Virginia         | 2012        | 1.0<br>(0.98–1.02)  |
| Virginia         | 2013        | 1.0<br>(0.98–1.02)  |
| Virginia         | 2014        | 1.0<br>(0.98–1.02)  |
| Virginia         | 2015        | 1.0<br>(0.98–1.03)  |
| Virginia         | 2016        | 1.03<br>(0.93–1.13) |
| Virginia         | 2017        | 1.02<br>(0.87–1.18) |
| Washington       | 1950        | 0.81<br>(0.67–0.97) |
| Washington       | 1951        | 0.86<br>(0.71–1.01) |
| Washington       | 1952        | 0.87<br>(0.73–1.02) |
| Washington       | 1953        | 0.87<br>(0.73–1.02) |
| Washington       | 1954        | 0.85<br>(0.71–1.0)  |
| Washington       | 1955        | 0.87<br>(0.73–1.01) |
| Washington       | 1956        | 0.89<br>(0.77–1.02) |
| Washington       | 1957        | 0.93<br>(0.83–1.03) |
| Washington       | 1958        | 0.96<br>(0.9–1.02)  |
| Washington       | 1959        | 1.0<br>(0.99–1.01)  |
| Washington       | 1960        | 1.0<br>(0.99–1.01)  |
| Washington       | 1961        | 1.0<br>(0.99–1.01)  |
| Washington       | 1962        | 1.0<br>(0.99–1.01)  |

**Table 15 Ratio of adjusted to unadjusted 5q0 values for scaled locations by year**

| <b>Geography</b> | <b>Year</b> | <b>Ratio</b>        |
|------------------|-------------|---------------------|
| Washington       | 1963        | 1.01<br>(0.99–1.02) |
| Washington       | 1964        | 1.0<br>(0.99–1.01)  |
| Washington       | 1965        | 1.0<br>(0.98–1.02)  |
| Washington       | 1966        | 1.0<br>(0.98–1.02)  |
| Washington       | 1967        | 1.0<br>(0.98–1.01)  |
| Washington       | 1968        | 1.0<br>(0.98–1.01)  |
| Washington       | 1969        | 1.0<br>(0.99–1.02)  |
| Washington       | 1970        | 1.01<br>(0.99–1.02) |
| Washington       | 1971        | 1.0<br>(0.98–1.01)  |
| Washington       | 1972        | 1.0<br>(0.99–1.01)  |
| Washington       | 1973        | 1.0<br>(0.99–1.02)  |
| Washington       | 1974        | 1.0<br>(0.99–1.02)  |
| Washington       | 1975        | 1.0<br>(0.98–1.01)  |
| Washington       | 1976        | 1.0<br>(0.99–1.02)  |
| Washington       | 1977        | 1.0<br>(0.98–1.01)  |
| Washington       | 1978        | 1.0<br>(0.99–1.01)  |
| Washington       | 1979        | 1.0<br>(0.99–1.01)  |
| Washington       | 1980        | 1.0<br>(0.99–1.01)  |
| Washington       | 1981        | 1.0<br>(0.98–1.01)  |
| Washington       | 1982        | 1.0<br>(0.99–1.01)  |
| Washington       | 1983        | 1.0<br>(0.98–1.01)  |
| Washington       | 1984        | 1.0<br>(0.98–1.01)  |
| Washington       | 1985        | 1.0<br>(0.99–1.02)  |
| Washington       | 1986        | 1.0<br>(0.99–1.01)  |
| Washington       | 1987        | 1.0<br>(0.99–1.01)  |
| Washington       | 1988        | 1.0<br>(0.99–1.02)  |
| Washington       | 1989        | 1.01<br>(0.99–1.02) |
| Washington       | 1990        | 1.0<br>(0.98–1.01)  |
| Washington       | 1991        | 1.0<br>(0.99–1.01)  |
| Washington       | 1992        | 0.99<br>(0.98–1.01) |
| Washington       | 1993        | 1.0<br>(0.99–1.02)  |

**Table 15 Ratio of adjusted to unadjusted 5q0 values for scaled locations by year**

| <b>Geography</b> | <b>Year</b> | <b>Ratio</b>        |
|------------------|-------------|---------------------|
| Washington       | 1994        | 1.0<br>(0.99–1.02)  |
| Washington       | 1995        | 0.99<br>(0.98–1.01) |
| Washington       | 1996        | 1.0<br>(0.98–1.01)  |
| Washington       | 1997        | 1.0<br>(0.98–1.02)  |
| Washington       | 1998        | 1.01<br>(0.99–1.02) |
| Washington       | 1999        | 1.0<br>(0.99–1.01)  |
| Washington       | 2000        | 1.0<br>(0.99–1.01)  |
| Washington       | 2001        | 0.99<br>(0.98–1.01) |
| Washington       | 2002        | 1.0<br>(0.98–1.02)  |
| Washington       | 2003        | 1.0<br>(0.98–1.02)  |
| Washington       | 2004        | 1.0<br>(0.98–1.01)  |
| Washington       | 2005        | 1.0<br>(0.99–1.01)  |
| Washington       | 2006        | 1.0<br>(0.98–1.02)  |
| Washington       | 2007        | 1.01<br>(0.99–1.02) |
| Washington       | 2008        | 1.0<br>(0.99–1.02)  |
| Washington       | 2009        | 1.0<br>(0.98–1.01)  |
| Washington       | 2010        | 0.99<br>(0.97–1.01) |
| Washington       | 2011        | 1.0<br>(0.98–1.02)  |
| Washington       | 2012        | 1.0<br>(0.98–1.02)  |
| Washington       | 2013        | 1.0<br>(0.98–1.02)  |
| Washington       | 2014        | 1.0<br>(0.98–1.02)  |
| Washington       | 2015        | 1.0<br>(0.98–1.03)  |
| Washington       | 2016        | 1.03<br>(0.93–1.13) |
| Washington       | 2017        | 1.02<br>(0.87–1.18) |
| West Virginia    | 1950        | 0.81<br>(0.67–0.97) |
| West Virginia    | 1951        | 0.86<br>(0.71–1.01) |
| West Virginia    | 1952        | 0.87<br>(0.74–1.02) |
| West Virginia    | 1953        | 0.87<br>(0.73–1.02) |
| West Virginia    | 1954        | 0.85<br>(0.71–1.0)  |
| West Virginia    | 1955        | 0.87<br>(0.73–1.01) |
| West Virginia    | 1956        | 0.89<br>(0.77–1.02) |

**Table 15 Ratio of adjusted to unadjusted 5q0 values for scaled locations by year**

| <b>Geography</b> | <b>Year</b> | <b>Ratio</b>        |
|------------------|-------------|---------------------|
| West Virginia    | 1957        | 0.93<br>(0.83–1.03) |
| West Virginia    | 1958        | 0.96<br>(0.9–1.02)  |
| West Virginia    | 1959        | 1.0<br>(0.99–1.01)  |
| West Virginia    | 1960        | 1.0<br>(0.99–1.01)  |
| West Virginia    | 1961        | 1.0<br>(0.99–1.01)  |
| West Virginia    | 1962        | 1.0<br>(0.99–1.01)  |
| West Virginia    | 1963        | 1.01<br>(0.99–1.02) |
| West Virginia    | 1964        | 1.0<br>(0.99–1.01)  |
| West Virginia    | 1965        | 1.0<br>(0.98–1.02)  |
| West Virginia    | 1966        | 1.0<br>(0.98–1.02)  |
| West Virginia    | 1967        | 1.0<br>(0.98–1.01)  |
| West Virginia    | 1968        | 1.0<br>(0.98–1.01)  |
| West Virginia    | 1969        | 1.0<br>(0.99–1.02)  |
| West Virginia    | 1970        | 1.01<br>(0.99–1.02) |
| West Virginia    | 1971        | 1.0<br>(0.98–1.01)  |
| West Virginia    | 1972        | 1.0<br>(0.99–1.01)  |
| West Virginia    | 1973        | 1.0<br>(0.99–1.02)  |
| West Virginia    | 1974        | 1.0<br>(0.99–1.02)  |
| West Virginia    | 1975        | 1.0<br>(0.98–1.01)  |
| West Virginia    | 1976        | 1.0<br>(0.99–1.02)  |
| West Virginia    | 1977        | 1.0<br>(0.98–1.01)  |
| West Virginia    | 1978        | 1.0<br>(0.99–1.01)  |
| West Virginia    | 1979        | 1.0<br>(0.99–1.01)  |
| West Virginia    | 1980        | 1.0<br>(0.99–1.01)  |
| West Virginia    | 1981        | 1.0<br>(0.98–1.01)  |
| West Virginia    | 1982        | 1.0<br>(0.99–1.01)  |
| West Virginia    | 1983        | 1.0<br>(0.98–1.01)  |
| West Virginia    | 1984        | 1.0<br>(0.98–1.01)  |
| West Virginia    | 1985        | 1.0<br>(0.99–1.02)  |
| West Virginia    | 1986        | 1.0<br>(0.99–1.01)  |
| West Virginia    | 1987        | 1.0<br>(0.99–1.01)  |



**Table 15 Ratio of adjusted to unadjusted 5q0 values for scaled locations by year**

| <b>Geography</b> | <b>Year</b> | <b>Ratio</b>        |
|------------------|-------------|---------------------|
| West Virginia    | 1988        | 1.0<br>(0.99–1.02)  |
| West Virginia    | 1989        | 1.01<br>(0.99–1.02) |
| West Virginia    | 1990        | 1.0<br>(0.98–1.01)  |
| West Virginia    | 1991        | 1.0<br>(0.99–1.01)  |
| West Virginia    | 1992        | 0.99<br>(0.98–1.01) |
| West Virginia    | 1993        | 1.0<br>(0.99–1.02)  |
| West Virginia    | 1994        | 1.0<br>(0.99–1.02)  |
| West Virginia    | 1995        | 0.99<br>(0.98–1.01) |
| West Virginia    | 1996        | 1.0<br>(0.98–1.01)  |
| West Virginia    | 1997        | 1.0<br>(0.98–1.02)  |
| West Virginia    | 1998        | 1.01<br>(0.99–1.02) |
| West Virginia    | 1999        | 1.0<br>(0.99–1.01)  |
| West Virginia    | 2000        | 1.0<br>(0.99–1.01)  |
| West Virginia    | 2001        | 0.99<br>(0.98–1.01) |
| West Virginia    | 2002        | 1.0<br>(0.98–1.02)  |
| West Virginia    | 2003        | 1.0<br>(0.98–1.02)  |
| West Virginia    | 2004        | 1.0<br>(0.98–1.01)  |
| West Virginia    | 2005        | 1.0<br>(0.99–1.01)  |
| West Virginia    | 2006        | 1.0<br>(0.98–1.02)  |
| West Virginia    | 2007        | 1.01<br>(0.99–1.02) |
| West Virginia    | 2008        | 1.0<br>(0.99–1.02)  |
| West Virginia    | 2009        | 1.0<br>(0.98–1.01)  |
| West Virginia    | 2010        | 0.99<br>(0.97–1.01) |
| West Virginia    | 2011        | 1.0<br>(0.98–1.02)  |
| West Virginia    | 2012        | 1.0<br>(0.98–1.02)  |
| West Virginia    | 2013        | 1.0<br>(0.98–1.02)  |
| West Virginia    | 2014        | 1.0<br>(0.98–1.02)  |
| West Virginia    | 2015        | 1.0<br>(0.98–1.03)  |
| West Virginia    | 2016        | 1.03<br>(0.93–1.13) |
| West Virginia    | 2017        | 1.02<br>(0.87–1.18) |
| Wisconsin        | 1950        | 0.81<br>(0.67–0.97) |

**Table 15 Ratio of adjusted to unadjusted 5q0 values for scaled locations by year**

| <b>Geography</b> | <b>Year</b> | <b>Ratio</b>        |
|------------------|-------------|---------------------|
| Wisconsin        | 1951        | 0.86<br>(0.71–1.01) |
| Wisconsin        | 1952        | 0.87<br>(0.74–1.02) |
| Wisconsin        | 1953        | 0.87<br>(0.73–1.02) |
| Wisconsin        | 1954        | 0.85<br>(0.71–1.0)  |
| Wisconsin        | 1955        | 0.87<br>(0.73–1.01) |
| Wisconsin        | 1956        | 0.89<br>(0.77–1.02) |
| Wisconsin        | 1957        | 0.93<br>(0.83–1.03) |
| Wisconsin        | 1958        | 0.96<br>(0.9–1.02)  |
| Wisconsin        | 1959        | 1.0<br>(0.99–1.01)  |
| Wisconsin        | 1960        | 1.0<br>(0.99–1.01)  |
| Wisconsin        | 1961        | 1.0<br>(0.99–1.01)  |
| Wisconsin        | 1962        | 1.0<br>(0.99–1.01)  |
| Wisconsin        | 1963        | 1.01<br>(0.99–1.02) |
| Wisconsin        | 1964        | 1.0<br>(0.99–1.01)  |
| Wisconsin        | 1965        | 1.0<br>(0.98–1.02)  |
| Wisconsin        | 1966        | 1.0<br>(0.98–1.02)  |
| Wisconsin        | 1967        | 1.0<br>(0.98–1.01)  |
| Wisconsin        | 1968        | 1.0<br>(0.98–1.01)  |
| Wisconsin        | 1969        | 1.0<br>(0.99–1.02)  |
| Wisconsin        | 1970        | 1.01<br>(0.99–1.02) |
| Wisconsin        | 1971        | 1.0<br>(0.98–1.01)  |
| Wisconsin        | 1972        | 1.0<br>(0.99–1.01)  |
| Wisconsin        | 1973        | 1.0<br>(0.99–1.02)  |
| Wisconsin        | 1974        | 1.0<br>(0.99–1.02)  |
| Wisconsin        | 1975        | 1.0<br>(0.98–1.01)  |
| Wisconsin        | 1976        | 1.0<br>(0.99–1.02)  |
| Wisconsin        | 1977        | 1.0<br>(0.98–1.01)  |
| Wisconsin        | 1978        | 1.0<br>(0.99–1.01)  |
| Wisconsin        | 1979        | 1.0<br>(0.99–1.01)  |
| Wisconsin        | 1980        | 1.0<br>(0.99–1.01)  |
| Wisconsin        | 1981        | 1.0<br>(0.98–1.01)  |

**Table 15 Ratio of adjusted to unadjusted 5q0 values for scaled locations by year**

| <b>Geography</b> | <b>Year</b> | <b>Ratio</b>        |
|------------------|-------------|---------------------|
| Wisconsin        | 1982        | 1.0<br>(0.99–1.01)  |
| Wisconsin        | 1983        | 1.0<br>(0.98–1.01)  |
| Wisconsin        | 1984        | 1.0<br>(0.98–1.01)  |
| Wisconsin        | 1985        | 1.0<br>(0.99–1.02)  |
| Wisconsin        | 1986        | 1.0<br>(0.99–1.01)  |
| Wisconsin        | 1987        | 1.0<br>(0.99–1.01)  |
| Wisconsin        | 1988        | 1.0<br>(0.99–1.02)  |
| Wisconsin        | 1989        | 1.01<br>(0.99–1.02) |
| Wisconsin        | 1990        | 1.0<br>(0.98–1.01)  |
| Wisconsin        | 1991        | 1.0<br>(0.99–1.01)  |
| Wisconsin        | 1992        | 0.99<br>(0.98–1.01) |
| Wisconsin        | 1993        | 1.0<br>(0.99–1.02)  |
| Wisconsin        | 1994        | 1.0<br>(0.99–1.02)  |
| Wisconsin        | 1995        | 0.99<br>(0.98–1.01) |
| Wisconsin        | 1996        | 1.0<br>(0.98–1.01)  |
| Wisconsin        | 1997        | 1.0<br>(0.98–1.02)  |
| Wisconsin        | 1998        | 1.01<br>(0.99–1.02) |
| Wisconsin        | 1999        | 1.0<br>(0.99–1.01)  |
| Wisconsin        | 2000        | 1.0<br>(0.99–1.01)  |
| Wisconsin        | 2001        | 0.99<br>(0.98–1.01) |
| Wisconsin        | 2002        | 1.0<br>(0.98–1.02)  |
| Wisconsin        | 2003        | 1.0<br>(0.98–1.02)  |
| Wisconsin        | 2004        | 1.0<br>(0.98–1.01)  |
| Wisconsin        | 2005        | 1.0<br>(0.99–1.01)  |
| Wisconsin        | 2006        | 1.0<br>(0.98–1.02)  |
| Wisconsin        | 2007        | 1.01<br>(0.99–1.02) |
| Wisconsin        | 2008        | 1.0<br>(0.99–1.02)  |
| Wisconsin        | 2009        | 1.0<br>(0.98–1.01)  |
| Wisconsin        | 2010        | 0.99<br>(0.97–1.01) |
| Wisconsin        | 2011        | 1.0<br>(0.98–1.02)  |
| Wisconsin        | 2012        | 1.0<br>(0.98–1.02)  |

**Table 15 Ratio of adjusted to unadjusted 5q0 values for scaled locations by year**

| <b>Geography</b> | <b>Year</b> | <b>Ratio</b>        |
|------------------|-------------|---------------------|
| Wisconsin        | 2013        | 1.0<br>(0.98–1.02)  |
| Wisconsin        | 2014        | 1.0<br>(0.98–1.02)  |
| Wisconsin        | 2015        | 1.0<br>(0.98–1.03)  |
| Wisconsin        | 2016        | 1.03<br>(0.93–1.13) |
| Wisconsin        | 2017        | 1.02<br>(0.87–1.18) |
| Wyoming          | 1950        | 0.81<br>(0.67–0.97) |
| Wyoming          | 1951        | 0.86<br>(0.71–1.01) |
| Wyoming          | 1952        | 0.87<br>(0.74–1.02) |
| Wyoming          | 1953        | 0.87<br>(0.73–1.02) |
| Wyoming          | 1954        | 0.85<br>(0.71–1.0)  |
| Wyoming          | 1955        | 0.87<br>(0.73–1.01) |
| Wyoming          | 1956        | 0.89<br>(0.77–1.02) |
| Wyoming          | 1957        | 0.93<br>(0.83–1.03) |
| Wyoming          | 1958        | 0.96<br>(0.91–1.02) |
| Wyoming          | 1959        | 1.0<br>(0.99–1.01)  |
| Wyoming          | 1960        | 1.0<br>(0.99–1.01)  |
| Wyoming          | 1961        | 1.0<br>(0.99–1.01)  |
| Wyoming          | 1962        | 1.0<br>(0.99–1.01)  |
| Wyoming          | 1963        | 1.01<br>(0.99–1.02) |
| Wyoming          | 1964        | 1.0<br>(0.99–1.01)  |
| Wyoming          | 1965        | 1.0<br>(0.98–1.02)  |
| Wyoming          | 1966        | 1.0<br>(0.98–1.02)  |
| Wyoming          | 1967        | 1.0<br>(0.98–1.01)  |
| Wyoming          | 1968        | 1.0<br>(0.98–1.01)  |
| Wyoming          | 1969        | 1.0<br>(0.99–1.02)  |
| Wyoming          | 1970        | 1.01<br>(0.99–1.02) |
| Wyoming          | 1971        | 1.0<br>(0.98–1.01)  |
| Wyoming          | 1972        | 1.0<br>(0.99–1.01)  |
| Wyoming          | 1973        | 1.0<br>(0.99–1.02)  |
| Wyoming          | 1974        | 1.0<br>(0.99–1.02)  |
| Wyoming          | 1975        | 1.0<br>(0.98–1.01)  |

**Table 15 Ratio of adjusted to unadjusted 5q0 values for scaled locations by year**

| <b>Geography</b> | <b>Year</b> | <b>Ratio</b>        |
|------------------|-------------|---------------------|
| Wyoming          | 1976        | 1.0<br>(0.99–1.02)  |
| Wyoming          | 1977        | 1.0<br>(0.98–1.01)  |
| Wyoming          | 1978        | 1.0<br>(0.99–1.01)  |
| Wyoming          | 1979        | 1.0<br>(0.99–1.01)  |
| Wyoming          | 1980        | 1.0<br>(0.99–1.01)  |
| Wyoming          | 1981        | 1.0<br>(0.98–1.01)  |
| Wyoming          | 1982        | 1.0<br>(0.99–1.01)  |
| Wyoming          | 1983        | 1.0<br>(0.98–1.01)  |
| Wyoming          | 1984        | 1.0<br>(0.98–1.01)  |
| Wyoming          | 1985        | 1.0<br>(0.99–1.02)  |
| Wyoming          | 1986        | 1.0<br>(0.99–1.01)  |
| Wyoming          | 1987        | 1.0<br>(0.99–1.01)  |
| Wyoming          | 1988        | 1.0<br>(0.99–1.02)  |
| Wyoming          | 1989        | 1.01<br>(0.99–1.02) |
| Wyoming          | 1990        | 1.0<br>(0.98–1.01)  |
| Wyoming          | 1991        | 1.0<br>(0.99–1.01)  |
| Wyoming          | 1992        | 0.99<br>(0.98–1.01) |
| Wyoming          | 1993        | 1.0<br>(0.99–1.02)  |
| Wyoming          | 1994        | 1.0<br>(0.99–1.02)  |
| Wyoming          | 1995        | 0.99<br>(0.98–1.01) |
| Wyoming          | 1996        | 1.0<br>(0.98–1.01)  |
| Wyoming          | 1997        | 1.0<br>(0.98–1.02)  |
| Wyoming          | 1998        | 1.01<br>(0.99–1.02) |
| Wyoming          | 1999        | 1.0<br>(0.99–1.01)  |
| Wyoming          | 2000        | 1.0<br>(0.99–1.01)  |
| Wyoming          | 2001        | 0.99<br>(0.98–1.01) |
| Wyoming          | 2002        | 1.0<br>(0.98–1.02)  |
| Wyoming          | 2003        | 1.0<br>(0.98–1.02)  |
| Wyoming          | 2004        | 1.0<br>(0.98–1.01)  |
| Wyoming          | 2005        | 1.0<br>(0.99–1.01)  |
| Wyoming          | 2006        | 1.0<br>(0.98–1.02)  |

**Table 15 Ratio of adjusted to unadjusted 5q0 values for scaled locations by year**

| <b>Geography</b> | <b>Year</b> | <b>Ratio</b>        |
|------------------|-------------|---------------------|
| Wyoming          | 2007        | 1.01<br>(0.99–1.02) |
| Wyoming          | 2008        | 1.0<br>(0.99–1.02)  |
| Wyoming          | 2009        | 1.0<br>(0.98–1.01)  |
| Wyoming          | 2010        | 0.99<br>(0.97–1.01) |
| Wyoming          | 2011        | 1.0<br>(0.98–1.02)  |
| Wyoming          | 2012        | 1.0<br>(0.98–1.02)  |
| Wyoming          | 2013        | 1.0<br>(0.98–1.02)  |
| Wyoming          | 2014        | 1.0<br>(0.98–1.02)  |
| Wyoming          | 2015        | 1.0<br>(0.98–1.03)  |
| Wyoming          | 2016        | 1.03<br>(0.93–1.13) |
| Wyoming          | 2017        | 1.02<br>(0.87–1.18) |
| Sweden           | 1950        | 1.0<br>(1.0–1.0)    |
| Sweden           | 1951        | 1.0<br>(1.0–1.0)    |
| Sweden           | 1952        | 1.0<br>(1.0–1.0)    |
| Sweden           | 1953        | 1.0<br>(1.0–1.0)    |
| Sweden           | 1954        | 1.0<br>(1.0–1.0)    |
| Sweden           | 1955        | 1.0<br>(1.0–1.0)    |
| Sweden           | 1956        | 1.0<br>(1.0–1.0)    |
| Sweden           | 1957        | 1.0<br>(1.0–1.0)    |
| Sweden           | 1958        | 1.0<br>(1.0–1.0)    |
| Sweden           | 1959        | 1.0<br>(1.0–1.0)    |
| Sweden           | 1960        | 1.0<br>(1.0–1.0)    |
| Sweden           | 1961        | 1.0<br>(1.0–1.0)    |
| Sweden           | 1962        | 1.0<br>(1.0–1.0)    |
| Sweden           | 1963        | 1.0<br>(1.0–1.0)    |
| Sweden           | 1964        | 1.0<br>(1.0–1.0)    |
| Sweden           | 1965        | 1.0<br>(1.0–1.0)    |
| Sweden           | 1966        | 1.0<br>(1.0–1.0)    |
| Sweden           | 1967        | 1.0<br>(1.0–1.0)    |
| Sweden           | 1968        | 1.0<br>(1.0–1.0)    |
| Sweden           | 1969        | 1.0<br>(1.0–1.0)    |

**Table 15 Ratio of adjusted to unadjusted 5q0 values for scaled locations by year**

| <b>Geography</b> | <b>Year</b> | <b>Ratio</b>     |
|------------------|-------------|------------------|
| Sweden           | 1970        | 1.0<br>(1.0–1.0) |
| Sweden           | 1971        | 1.0<br>(1.0–1.0) |
| Sweden           | 1972        | 1.0<br>(1.0–1.0) |
| Sweden           | 1973        | 1.0<br>(1.0–1.0) |
| Sweden           | 1974        | 1.0<br>(1.0–1.0) |
| Sweden           | 1975        | 1.0<br>(1.0–1.0) |
| Sweden           | 1976        | 1.0<br>(1.0–1.0) |
| Sweden           | 1977        | 1.0<br>(1.0–1.0) |
| Sweden           | 1978        | 1.0<br>(1.0–1.0) |
| Sweden           | 1979        | 1.0<br>(1.0–1.0) |
| Sweden           | 1980        | 1.0<br>(1.0–1.0) |
| Sweden           | 1981        | 1.0<br>(1.0–1.0) |
| Sweden           | 1982        | 1.0<br>(1.0–1.0) |
| Sweden           | 1983        | 1.0<br>(1.0–1.0) |
| Sweden           | 1984        | 1.0<br>(1.0–1.0) |
| Sweden           | 1985        | 1.0<br>(1.0–1.0) |
| Sweden           | 1986        | 1.0<br>(1.0–1.0) |
| Sweden           | 1987        | 1.0<br>(1.0–1.0) |
| Sweden           | 1988        | 1.0<br>(1.0–1.0) |
| Sweden           | 1989        | 1.0<br>(1.0–1.0) |
| Sweden           | 1990        | 1.0<br>(1.0–1.0) |
| Sweden           | 1991        | 1.0<br>(1.0–1.0) |
| Sweden           | 1992        | 1.0<br>(1.0–1.0) |
| Sweden           | 1993        | 1.0<br>(1.0–1.0) |
| Sweden           | 1994        | 1.0<br>(1.0–1.0) |
| Sweden           | 1995        | 1.0<br>(1.0–1.0) |
| Sweden           | 1996        | 1.0<br>(1.0–1.0) |
| Sweden           | 1997        | 1.0<br>(1.0–1.0) |
| Sweden           | 1998        | 1.0<br>(1.0–1.0) |
| Sweden           | 1999        | 1.0<br>(1.0–1.0) |
| Sweden           | 2000        | 1.0<br>(1.0–1.0) |

**Table 15 Ratio of adjusted to unadjusted 5q0 values for scaled locations by year**

| <b>Geography</b> | <b>Year</b> | <b>Ratio</b>        |
|------------------|-------------|---------------------|
| Sweden           | 2001        | 1.0<br>(1.0–1.0)    |
| Sweden           | 2002        | 1.0<br>(1.0–1.0)    |
| Sweden           | 2003        | 1.0<br>(1.0–1.0)    |
| Sweden           | 2004        | 1.0<br>(1.0–1.0)    |
| Sweden           | 2005        | 1.0<br>(1.0–1.0)    |
| Sweden           | 2006        | 1.0<br>(1.0–1.0)    |
| Sweden           | 2007        | 1.0<br>(1.0–1.0)    |
| Sweden           | 2008        | 1.0<br>(1.0–1.0)    |
| Sweden           | 2009        | 1.0<br>(1.0–1.0)    |
| Sweden           | 2010        | 1.0<br>(1.0–1.0)    |
| Sweden           | 2011        | 1.0<br>(1.0–1.0)    |
| Sweden           | 2012        | 1.0<br>(1.0–1.0)    |
| Sweden           | 2013        | 1.0<br>(1.0–1.0)    |
| Sweden           | 2014        | 1.0<br>(1.0–1.0)    |
| Sweden           | 2015        | 1.0<br>(1.0–1.0)    |
| Sweden           | 2016        | 1.0<br>(1.0–1.0)    |
| Sweden           | 2017        | 1.0<br>(1.0–1.0)    |
| Stockholm        | 1950        | 1.1<br>(0.9–1.33)   |
| Stockholm        | 1951        | 1.14<br>(0.93–1.38) |
| Stockholm        | 1952        | 1.12<br>(0.91–1.35) |
| Stockholm        | 1953        | 1.09<br>(0.89–1.31) |
| Stockholm        | 1954        | 1.08<br>(0.89–1.28) |
| Stockholm        | 1955        | 1.08<br>(0.89–1.28) |
| Stockholm        | 1956        | 1.1<br>(0.91–1.32)  |
| Stockholm        | 1957        | 1.13<br>(0.93–1.36) |
| Stockholm        | 1958        | 1.08<br>(0.9–1.29)  |
| Stockholm        | 1959        | 1.13<br>(0.94–1.36) |
| Stockholm        | 1960        | 1.17<br>(0.96–1.39) |
| Stockholm        | 1961        | 1.17<br>(0.96–1.41) |
| Stockholm        | 1962        | 1.18<br>(0.96–1.43) |
| Stockholm        | 1963        | 1.2<br>(0.97–1.45)  |



**Table 15 Ratio of adjusted to unadjusted 5q0 values for scaled locations by year**

| <b>Geography</b> | <b>Year</b> | <b>Ratio</b>        |
|------------------|-------------|---------------------|
| Stockholm        | 1964        | 1.18<br>(0.96–1.42) |
| Stockholm        | 1965        | 1.13<br>(0.92–1.36) |
| Stockholm        | 1966        | 1.12<br>(0.91–1.34) |
| Stockholm        | 1967        | 1.14<br>(0.93–1.36) |
| Stockholm        | 1968        | 1.17<br>(0.95–1.39) |
| Stockholm        | 1969        | 1.13<br>(0.93–1.34) |
| Stockholm        | 1970        | 1.14<br>(0.94–1.35) |
| Stockholm        | 1971        | 1.16<br>(0.98–1.36) |
| Stockholm        | 1972        | 1.17<br>(0.99–1.36) |
| Stockholm        | 1973        | 1.12<br>(0.95–1.29) |
| Stockholm        | 1974        | 1.13<br>(0.97–1.29) |
| Stockholm        | 1975        | 1.08<br>(0.93–1.22) |
| Stockholm        | 1976        | 1.06<br>(0.93–1.19) |
| Stockholm        | 1977        | 1.08<br>(0.96–1.2)  |
| Stockholm        | 1978        | 1.08<br>(0.98–1.19) |
| Stockholm        | 1979        | 1.11<br>(1.02–1.21) |
| Stockholm        | 1980        | 1.02<br>(0.95–1.09) |
| Stockholm        | 1981        | 1.0<br>(0.95–1.05)  |
| Stockholm        | 1982        | 1.0<br>(0.95–1.05)  |
| Stockholm        | 1983        | 0.99<br>(0.94–1.06) |
| Stockholm        | 1984        | 0.96<br>(0.9–1.03)  |
| Stockholm        | 1985        | 1.01<br>(0.95–1.08) |
| Stockholm        | 1986        | 0.99<br>(0.92–1.06) |
| Stockholm        | 1987        | 1.06<br>(0.98–1.13) |
| Stockholm        | 1988        | 1.05<br>(0.98–1.13) |
| Stockholm        | 1989        | 1.04<br>(0.97–1.12) |
| Stockholm        | 1990        | 1.04<br>(0.98–1.1)  |
| Stockholm        | 1991        | 1.05<br>(0.99–1.12) |
| Stockholm        | 1992        | 1.02<br>(0.95–1.08) |
| Stockholm        | 1993        | 1.0<br>(0.93–1.07)  |
| Stockholm        | 1994        | 0.99<br>(0.92–1.06) |

**Table 15 Ratio of adjusted to unadjusted 5q0 values for scaled locations by year**

| <b>Geography</b>        | <b>Year</b> | <b>Ratio</b>        |
|-------------------------|-------------|---------------------|
| Stockholm               | 1995        | 0.96<br>(0.89–1.02) |
| Stockholm               | 1996        | 0.97<br>(0.9–1.04)  |
| Stockholm               | 1997        | 0.97<br>(0.9–1.05)  |
| Stockholm               | 1998        | 0.98<br>(0.91–1.06) |
| Stockholm               | 1999        | 0.97<br>(0.9–1.06)  |
| Stockholm               | 2000        | 0.99<br>(0.9–1.07)  |
| Stockholm               | 2001        | 1.04<br>(0.97–1.12) |
| Stockholm               | 2002        | 1.02<br>(0.96–1.09) |
| Stockholm               | 2003        | 1.02<br>(0.94–1.11) |
| Stockholm               | 2004        | 1.04<br>(0.95–1.12) |
| Stockholm               | 2005        | 0.97<br>(0.89–1.04) |
| Stockholm               | 2006        | 1.0<br>(0.93–1.09)  |
| Stockholm               | 2007        | 0.96<br>(0.89–1.04) |
| Stockholm               | 2008        | 0.95<br>(0.87–1.03) |
| Stockholm               | 2009        | 0.99<br>(0.92–1.07) |
| Stockholm               | 2010        | 0.98<br>(0.9–1.06)  |
| Stockholm               | 2011        | 0.9<br>(0.83–0.98)  |
| Stockholm               | 2012        | 1.0<br>(0.92–1.08)  |
| Stockholm               | 2013        | 1.02<br>(0.96–1.09) |
| Stockholm               | 2014        | 0.95<br>(0.87–1.03) |
| Stockholm               | 2015        | 1.0<br>(0.91–1.09)  |
| Stockholm               | 2016        | 1.02<br>(0.92–1.15) |
| Stockholm               | 2017        | 0.98<br>(0.84–1.14) |
| Sweden except Stockholm | 1950        | 1.1<br>(0.9–1.33)   |
| Sweden except Stockholm | 1951        | 1.14<br>(0.93–1.38) |
| Sweden except Stockholm | 1952        | 1.12<br>(0.91–1.35) |
| Sweden except Stockholm | 1953        | 1.09<br>(0.89–1.31) |
| Sweden except Stockholm | 1954        | 1.08<br>(0.89–1.28) |
| Sweden except Stockholm | 1955        | 1.08<br>(0.89–1.28) |
| Sweden except Stockholm | 1956        | 1.1<br>(0.91–1.32)  |
| Sweden except Stockholm | 1957        | 1.13<br>(0.93–1.36) |

**Table 15 Ratio of adjusted to unadjusted 5q0 values for scaled locations by year**

| <b>Geography</b>        | <b>Year</b> | <b>Ratio</b>        |
|-------------------------|-------------|---------------------|
| Sweden except Stockholm | 1958        | 1.08<br>(0.9–1.29)  |
| Sweden except Stockholm | 1959        | 1.13<br>(0.94–1.36) |
| Sweden except Stockholm | 1960        | 1.17<br>(0.96–1.39) |
| Sweden except Stockholm | 1961        | 1.17<br>(0.96–1.41) |
| Sweden except Stockholm | 1962        | 1.18<br>(0.96–1.43) |
| Sweden except Stockholm | 1963        | 1.2<br>(0.97–1.45)  |
| Sweden except Stockholm | 1964        | 1.18<br>(0.96–1.42) |
| Sweden except Stockholm | 1965        | 1.13<br>(0.92–1.36) |
| Sweden except Stockholm | 1966        | 1.12<br>(0.91–1.34) |
| Sweden except Stockholm | 1967        | 1.14<br>(0.93–1.36) |
| Sweden except Stockholm | 1968        | 1.17<br>(0.95–1.39) |
| Sweden except Stockholm | 1969        | 1.13<br>(0.93–1.34) |
| Sweden except Stockholm | 1970        | 1.14<br>(0.94–1.35) |
| Sweden except Stockholm | 1971        | 1.16<br>(0.98–1.36) |
| Sweden except Stockholm | 1972        | 1.17<br>(0.99–1.36) |
| Sweden except Stockholm | 1973        | 1.12<br>(0.95–1.29) |
| Sweden except Stockholm | 1974        | 1.13<br>(0.97–1.29) |
| Sweden except Stockholm | 1975        | 1.08<br>(0.93–1.22) |
| Sweden except Stockholm | 1976        | 1.06<br>(0.93–1.19) |
| Sweden except Stockholm | 1977        | 1.08<br>(0.96–1.2)  |
| Sweden except Stockholm | 1978        | 1.08<br>(0.98–1.19) |
| Sweden except Stockholm | 1979        | 1.11<br>(1.02–1.21) |
| Sweden except Stockholm | 1980        | 1.02<br>(0.95–1.09) |
| Sweden except Stockholm | 1981        | 1.0<br>(0.95–1.05)  |
| Sweden except Stockholm | 1982        | 1.0<br>(0.95–1.05)  |
| Sweden except Stockholm | 1983        | 0.99<br>(0.94–1.06) |
| Sweden except Stockholm | 1984        | 0.96<br>(0.9–1.03)  |
| Sweden except Stockholm | 1985        | 1.01<br>(0.95–1.08) |
| Sweden except Stockholm | 1986        | 0.99<br>(0.92–1.06) |
| Sweden except Stockholm | 1987        | 1.06<br>(0.98–1.13) |
| Sweden except Stockholm | 1988        | 1.05<br>(0.98–1.13) |

**Table 15 Ratio of adjusted to unadjusted 5q0 values for scaled locations by year**

| <b>Geography</b>        | <b>Year</b> | <b>Ratio</b>        |
|-------------------------|-------------|---------------------|
| Sweden except Stockholm | 1989        | 1.04<br>(0.97–1.12) |
| Sweden except Stockholm | 1990        | 1.04<br>(0.98–1.1)  |
| Sweden except Stockholm | 1991        | 1.05<br>(0.99–1.12) |
| Sweden except Stockholm | 1992        | 1.02<br>(0.95–1.08) |
| Sweden except Stockholm | 1993        | 1.0<br>(0.93–1.07)  |
| Sweden except Stockholm | 1994        | 0.99<br>(0.92–1.06) |
| Sweden except Stockholm | 1995        | 0.96<br>(0.89–1.02) |
| Sweden except Stockholm | 1996        | 0.97<br>(0.9–1.04)  |
| Sweden except Stockholm | 1997        | 0.97<br>(0.9–1.05)  |
| Sweden except Stockholm | 1998        | 0.98<br>(0.91–1.06) |
| Sweden except Stockholm | 1999        | 0.97<br>(0.9–1.06)  |
| Sweden except Stockholm | 2000        | 0.99<br>(0.9–1.07)  |
| Sweden except Stockholm | 2001        | 1.04<br>(0.97–1.12) |
| Sweden except Stockholm | 2002        | 1.02<br>(0.96–1.09) |
| Sweden except Stockholm | 2003        | 1.02<br>(0.94–1.11) |
| Sweden except Stockholm | 2004        | 1.04<br>(0.95–1.12) |
| Sweden except Stockholm | 2005        | 0.97<br>(0.89–1.04) |
| Sweden except Stockholm | 2006        | 1.0<br>(0.93–1.09)  |
| Sweden except Stockholm | 2007        | 0.96<br>(0.89–1.04) |
| Sweden except Stockholm | 2008        | 0.95<br>(0.87–1.03) |
| Sweden except Stockholm | 2009        | 0.99<br>(0.92–1.07) |
| Sweden except Stockholm | 2010        | 0.98<br>(0.9–1.06)  |
| Sweden except Stockholm | 2011        | 0.9<br>(0.83–0.98)  |
| Sweden except Stockholm | 2012        | 1.0<br>(0.92–1.08)  |
| Sweden except Stockholm | 2013        | 1.02<br>(0.96–1.09) |
| Sweden except Stockholm | 2014        | 0.95<br>(0.87–1.03) |
| Sweden except Stockholm | 2015        | 1.0<br>(0.91–1.09)  |
| Sweden except Stockholm | 2016        | 1.02<br>(0.92–1.15) |
| Sweden except Stockholm | 2017        | 0.98<br>(0.84–1.14) |
| United Kingdom          | 1950        | 1.0<br>(1.0–1.0)    |
| United Kingdom          | 1951        | 1.0<br>(1.0–1.0)    |

**Table 15 Ratio of adjusted to unadjusted 5q0 values for scaled locations by year**

| <b>Geography</b> | <b>Year</b> | <b>Ratio</b>     |
|------------------|-------------|------------------|
| United Kingdom   | 1952        | 1.0<br>(1.0–1.0) |
| United Kingdom   | 1953        | 1.0<br>(1.0–1.0) |
| United Kingdom   | 1954        | 1.0<br>(1.0–1.0) |
| United Kingdom   | 1955        | 1.0<br>(1.0–1.0) |
| United Kingdom   | 1956        | 1.0<br>(1.0–1.0) |
| United Kingdom   | 1957        | 1.0<br>(1.0–1.0) |
| United Kingdom   | 1958        | 1.0<br>(1.0–1.0) |
| United Kingdom   | 1959        | 1.0<br>(1.0–1.0) |
| United Kingdom   | 1960        | 1.0<br>(1.0–1.0) |
| United Kingdom   | 1961        | 1.0<br>(1.0–1.0) |
| United Kingdom   | 1962        | 1.0<br>(1.0–1.0) |
| United Kingdom   | 1963        | 1.0<br>(1.0–1.0) |
| United Kingdom   | 1964        | 1.0<br>(1.0–1.0) |
| United Kingdom   | 1965        | 1.0<br>(1.0–1.0) |
| United Kingdom   | 1966        | 1.0<br>(1.0–1.0) |
| United Kingdom   | 1967        | 1.0<br>(1.0–1.0) |
| United Kingdom   | 1968        | 1.0<br>(1.0–1.0) |
| United Kingdom   | 1969        | 1.0<br>(1.0–1.0) |
| United Kingdom   | 1970        | 1.0<br>(1.0–1.0) |
| United Kingdom   | 1971        | 1.0<br>(1.0–1.0) |
| United Kingdom   | 1972        | 1.0<br>(1.0–1.0) |
| United Kingdom   | 1973        | 1.0<br>(1.0–1.0) |
| United Kingdom   | 1974        | 1.0<br>(1.0–1.0) |
| United Kingdom   | 1975        | 1.0<br>(1.0–1.0) |
| United Kingdom   | 1976        | 1.0<br>(1.0–1.0) |
| United Kingdom   | 1977        | 1.0<br>(1.0–1.0) |
| United Kingdom   | 1978        | 1.0<br>(1.0–1.0) |
| United Kingdom   | 1979        | 1.0<br>(1.0–1.0) |
| United Kingdom   | 1980        | 1.0<br>(1.0–1.0) |
| United Kingdom   | 1981        | 1.0<br>(1.0–1.0) |
| United Kingdom   | 1982        | 1.0<br>(1.0–1.0) |

**Table 15 Ratio of adjusted to unadjusted 5q0 values for scaled locations by year**

| <b>Geography</b> | <b>Year</b> | <b>Ratio</b>     |
|------------------|-------------|------------------|
| United Kingdom   | 1983        | 1.0<br>(1.0–1.0) |
| United Kingdom   | 1984        | 1.0<br>(1.0–1.0) |
| United Kingdom   | 1985        | 1.0<br>(1.0–1.0) |
| United Kingdom   | 1986        | 1.0<br>(1.0–1.0) |
| United Kingdom   | 1987        | 1.0<br>(1.0–1.0) |
| United Kingdom   | 1988        | 1.0<br>(1.0–1.0) |
| United Kingdom   | 1989        | 1.0<br>(1.0–1.0) |
| United Kingdom   | 1990        | 1.0<br>(1.0–1.0) |
| United Kingdom   | 1991        | 1.0<br>(1.0–1.0) |
| United Kingdom   | 1992        | 1.0<br>(1.0–1.0) |
| United Kingdom   | 1993        | 1.0<br>(1.0–1.0) |
| United Kingdom   | 1994        | 1.0<br>(1.0–1.0) |
| United Kingdom   | 1995        | 1.0<br>(1.0–1.0) |
| United Kingdom   | 1996        | 1.0<br>(1.0–1.0) |
| United Kingdom   | 1997        | 1.0<br>(1.0–1.0) |
| United Kingdom   | 1998        | 1.0<br>(1.0–1.0) |
| United Kingdom   | 1999        | 1.0<br>(1.0–1.0) |
| United Kingdom   | 2000        | 1.0<br>(1.0–1.0) |
| United Kingdom   | 2001        | 1.0<br>(1.0–1.0) |
| United Kingdom   | 2002        | 1.0<br>(1.0–1.0) |
| United Kingdom   | 2003        | 1.0<br>(1.0–1.0) |
| United Kingdom   | 2004        | 1.0<br>(1.0–1.0) |
| United Kingdom   | 2005        | 1.0<br>(1.0–1.0) |
| United Kingdom   | 2006        | 1.0<br>(1.0–1.0) |
| United Kingdom   | 2007        | 1.0<br>(1.0–1.0) |
| United Kingdom   | 2008        | 1.0<br>(1.0–1.0) |
| United Kingdom   | 2009        | 1.0<br>(1.0–1.0) |
| United Kingdom   | 2010        | 1.0<br>(1.0–1.0) |
| United Kingdom   | 2011        | 1.0<br>(1.0–1.0) |
| United Kingdom   | 2012        | 1.0<br>(1.0–1.0) |
| United Kingdom   | 2013        | 1.0<br>(1.0–1.0) |

**Table 15 Ratio of adjusted to unadjusted 5q0 values for scaled locations by year**

| <b>Geography</b> | <b>Year</b> | <b>Ratio</b>        |
|------------------|-------------|---------------------|
| United Kingdom   | 2014        | 1.0<br>(1.0–1.0)    |
| United Kingdom   | 2015        | 1.0<br>(1.0–1.0)    |
| United Kingdom   | 2016        | 1.0<br>(1.0–1.0)    |
| United Kingdom   | 2017        | 1.0<br>(1.0–1.0)    |
| England          | 1950        | 1.07<br>(0.88–1.28) |
| England          | 1951        | 1.24<br>(1.01–1.47) |
| England          | 1952        | 1.15<br>(0.95–1.37) |
| England          | 1953        | 1.15<br>(0.95–1.37) |
| England          | 1954        | 1.08<br>(0.88–1.29) |
| England          | 1955        | 1.07<br>(0.89–1.29) |
| England          | 1956        | 1.04<br>(0.86–1.25) |
| England          | 1957        | 1.05<br>(0.87–1.26) |
| England          | 1958        | 1.02<br>(0.85–1.22) |
| England          | 1959        | 1.01<br>(0.84–1.21) |
| England          | 1960        | 1.01<br>(0.84–1.21) |
| England          | 1961        | 1.02<br>(0.84–1.22) |
| England          | 1962        | 1.03<br>(0.85–1.24) |
| England          | 1963        | 1.03<br>(0.84–1.24) |
| England          | 1964        | 0.99<br>(0.8–1.19)  |
| England          | 1965        | 0.96<br>(0.77–1.15) |
| England          | 1966        | 0.98<br>(0.79–1.17) |
| England          | 1967        | 0.95<br>(0.78–1.15) |
| England          | 1968        | 0.98<br>(0.8–1.18)  |
| England          | 1969        | 0.98<br>(0.81–1.18) |
| England          | 1970        | 1.01<br>(0.83–1.2)  |
| England          | 1971        | 1.03<br>(0.84–1.23) |
| England          | 1972        | 1.03<br>(0.85–1.21) |
| England          | 1973        | 1.02<br>(0.85–1.2)  |
| England          | 1974        | 1.03<br>(0.86–1.2)  |
| England          | 1975        | 1.02<br>(0.86–1.19) |
| England          | 1976        | 0.98<br>(0.84–1.13) |

**Table 15 Ratio of adjusted to unadjusted 5q0 values for scaled locations by year**

| <b>Geography</b> | <b>Year</b> | <b>Ratio</b>        |
|------------------|-------------|---------------------|
| England          | 1977        | 1.0<br>(0.87–1.14)  |
| England          | 1978        | 1.04<br>(0.93–1.17) |
| England          | 1979        | 1.07<br>(0.98–1.17) |
| England          | 1980        | 1.04<br>(0.98–1.11) |
| England          | 1981        | 1.0<br>(0.98–1.03)  |
| England          | 1982        | 1.01<br>(0.98–1.03) |
| England          | 1983        | 1.01<br>(0.98–1.03) |
| England          | 1984        | 1.0<br>(0.98–1.03)  |
| England          | 1985        | 1.01<br>(0.98–1.04) |
| England          | 1986        | 1.01<br>(0.99–1.04) |
| England          | 1987        | 1.01<br>(0.98–1.04) |
| England          | 1988        | 1.01<br>(0.98–1.04) |
| England          | 1989        | 1.01<br>(0.98–1.03) |
| England          | 1990        | 1.01<br>(0.98–1.04) |
| England          | 1991        | 1.01<br>(0.98–1.05) |
| England          | 1992        | 1.0<br>(0.97–1.03)  |
| England          | 1993        | 1.01<br>(0.98–1.04) |
| England          | 1994        | 1.01<br>(0.98–1.04) |
| England          | 1995        | 1.01<br>(0.98–1.04) |
| England          | 1996        | 1.01<br>(0.98–1.04) |
| England          | 1997        | 1.0<br>(0.97–1.03)  |
| England          | 1998        | 1.01<br>(0.98–1.04) |
| England          | 1999        | 1.02<br>(0.99–1.06) |
| England          | 2000        | 1.01<br>(0.94–1.08) |
| England          | 2001        | 0.99<br>(0.96–1.02) |
| England          | 2002        | 0.98<br>(0.95–1.01) |
| England          | 2003        | 1.01<br>(0.97–1.05) |
| England          | 2004        | 0.99<br>(0.96–1.02) |
| England          | 2005        | 0.99<br>(0.96–1.03) |
| England          | 2006        | 1.0<br>(0.97–1.04)  |
| England          | 2007        | 1.0<br>(0.97–1.04)  |



**Table 15 Ratio of adjusted to unadjusted 5q0 values for scaled locations by year**

| <b>Geography</b> | <b>Year</b> | <b>Ratio</b>        |
|------------------|-------------|---------------------|
| England          | 2008        | 1.0<br>(0.97–1.04)  |
| England          | 2009        | 1.0<br>(0.96–1.03)  |
| England          | 2010        | 0.99<br>(0.95–1.02) |
| England          | 2011        | 1.0<br>(0.96–1.03)  |
| England          | 2012        | 1.01<br>(0.97–1.04) |
| England          | 2013        | 1.0<br>(0.97–1.04)  |
| England          | 2014        | 1.0<br>(0.96–1.03)  |
| England          | 2015        | 1.0<br>(0.97–1.04)  |
| England          | 2016        | 1.0<br>(0.96–1.04)  |
| England          | 2017        | 1.02<br>(0.92–1.12) |
| East Midlands    | 1950        | 0.9<br>(0.74–1.08)  |
| East Midlands    | 1951        | 1.04<br>(0.85–1.25) |
| East Midlands    | 1952        | 0.97<br>(0.8–1.17)  |
| East Midlands    | 1953        | 0.98<br>(0.81–1.17) |
| East Midlands    | 1954        | 0.91<br>(0.75–1.1)  |
| East Midlands    | 1955        | 0.91<br>(0.74–1.11) |
| East Midlands    | 1956        | 0.89<br>(0.73–1.09) |
| East Midlands    | 1957        | 0.9<br>(0.73–1.1)   |
| East Midlands    | 1958        | 0.88<br>(0.71–1.07) |
| East Midlands    | 1959        | 0.87<br>(0.71–1.06) |
| East Midlands    | 1960        | 0.88<br>(0.71–1.06) |
| East Midlands    | 1961        | 0.89<br>(0.73–1.07) |
| East Midlands    | 1962        | 0.91<br>(0.74–1.09) |
| East Midlands    | 1963        | 0.91<br>(0.75–1.09) |
| East Midlands    | 1964        | 0.88<br>(0.72–1.05) |
| East Midlands    | 1965        | 0.85<br>(0.69–1.02) |
| East Midlands    | 1966        | 0.87<br>(0.71–1.04) |
| East Midlands    | 1967        | 0.85<br>(0.69–1.02) |
| East Midlands    | 1968        | 0.88<br>(0.72–1.05) |
| East Midlands    | 1969        | 0.89<br>(0.73–1.06) |
| East Midlands    | 1970        | 0.91<br>(0.76–1.08) |

**Table 15 Ratio of adjusted to unadjusted 5q0 values for scaled locations by year**

| <b>Geography</b> | <b>Year</b> | <b>Ratio</b>        |
|------------------|-------------|---------------------|
| East Midlands    | 1971        | 0.93<br>(0.78–1.1)  |
| East Midlands    | 1972        | 0.93<br>(0.78–1.11) |
| East Midlands    | 1973        | 0.93<br>(0.78–1.12) |
| East Midlands    | 1974        | 0.94<br>(0.79–1.11) |
| East Midlands    | 1975        | 0.93<br>(0.79–1.1)  |
| East Midlands    | 1976        | 0.9<br>(0.77–1.04)  |
| East Midlands    | 1977        | 0.92<br>(0.8–1.04)  |
| East Midlands    | 1978        | 0.96<br>(0.85–1.08) |
| East Midlands    | 1979        | 0.98<br>(0.9–1.08)  |
| East Midlands    | 1980        | 0.97<br>(0.9–1.04)  |
| East Midlands    | 1981        | 0.93<br>(0.89–0.97) |
| East Midlands    | 1982        | 0.98<br>(0.95–1.01) |
| East Midlands    | 1983        | 1.0<br>(0.97–1.03)  |
| East Midlands    | 1984        | 0.98<br>(0.95–1.01) |
| East Midlands    | 1985        | 0.99<br>(0.95–1.02) |
| East Midlands    | 1986        | 0.99<br>(0.97–1.02) |
| East Midlands    | 1987        | 0.99<br>(0.96–1.01) |
| East Midlands    | 1988        | 1.0<br>(0.97–1.03)  |
| East Midlands    | 1989        | 0.99<br>(0.97–1.01) |
| East Midlands    | 1990        | 1.0<br>(0.98–1.02)  |
| East Midlands    | 1991        | 1.0<br>(0.98–1.02)  |
| East Midlands    | 1992        | 0.97<br>(0.95–1.0)  |
| East Midlands    | 1993        | 1.0<br>(0.97–1.02)  |
| East Midlands    | 1994        | 1.01<br>(0.98–1.04) |
| East Midlands    | 1995        | 1.02<br>(0.99–1.05) |
| East Midlands    | 1996        | 1.04<br>(1.01–1.06) |
| East Midlands    | 1997        | 1.01<br>(0.97–1.05) |
| East Midlands    | 1998        | 1.0<br>(0.96–1.03)  |
| East Midlands    | 1999        | 1.02<br>(0.99–1.06) |
| East Midlands    | 2000        | 1.01<br>(0.95–1.09) |
| East Midlands    | 2001        | 1.0<br>(0.96–1.04)  |

**Table 15 Ratio of adjusted to unadjusted 5q0 values for scaled locations by year**

| <b>Geography</b> | <b>Year</b> | <b>Ratio</b>        |
|------------------|-------------|---------------------|
| East Midlands    | 2002        | 0.98<br>(0.95–1.02) |
| East Midlands    | 2003        | 1.02<br>(0.98–1.06) |
| East Midlands    | 2004        | 0.99<br>(0.96–1.02) |
| East Midlands    | 2005        | 0.99<br>(0.95–1.03) |
| East Midlands    | 2006        | 1.01<br>(0.97–1.05) |
| East Midlands    | 2007        | 1.01<br>(0.98–1.05) |
| East Midlands    | 2008        | 1.01<br>(0.98–1.04) |
| East Midlands    | 2009        | 1.0<br>(0.96–1.04)  |
| East Midlands    | 2010        | 0.98<br>(0.95–1.02) |
| East Midlands    | 2011        | 1.0<br>(0.96–1.04)  |
| East Midlands    | 2012        | 1.0<br>(0.96–1.04)  |
| East Midlands    | 2013        | 0.99<br>(0.95–1.02) |
| East Midlands    | 2014        | 0.99<br>(0.95–1.03) |
| East Midlands    | 2015        | 1.0<br>(0.96–1.04)  |
| East Midlands    | 2016        | 1.0<br>(0.94–1.05)  |
| East Midlands    | 2017        | 1.02<br>(0.92–1.14) |
| Derby            | 1950        | 0.67<br>(0.55–0.8)  |
| Derby            | 1951        | 0.77<br>(0.64–0.93) |
| Derby            | 1952        | 0.72<br>(0.6–0.87)  |
| Derby            | 1953        | 0.73<br>(0.6–0.87)  |
| Derby            | 1954        | 0.69<br>(0.56–0.82) |
| Derby            | 1955        | 0.69<br>(0.56–0.83) |
| Derby            | 1956        | 0.68<br>(0.56–0.82) |
| Derby            | 1957        | 0.69<br>(0.57–0.82) |
| Derby            | 1958        | 0.68<br>(0.57–0.8)  |
| Derby            | 1959        | 0.68<br>(0.57–0.81) |
| Derby            | 1960        | 0.7<br>(0.57–0.83)  |
| Derby            | 1961        | 0.71<br>(0.58–0.85) |
| Derby            | 1962        | 0.73<br>(0.6–0.88)  |
| Derby            | 1963        | 0.74<br>(0.6–0.89)  |
| Derby            | 1964        | 0.73<br>(0.59–0.87) |

**Table 15 Ratio of adjusted to unadjusted 5q0 values for scaled locations by year**

| <b>Geography</b> | <b>Year</b> | <b>Ratio</b>        |
|------------------|-------------|---------------------|
| Derby            | 1965        | 0.71<br>(0.58–0.85) |
| Derby            | 1966        | 0.74<br>(0.6–0.88)  |
| Derby            | 1967        | 0.73<br>(0.59–0.88) |
| Derby            | 1968        | 0.77<br>(0.62–0.92) |
| Derby            | 1969        | 0.78<br>(0.64–0.94) |
| Derby            | 1970        | 0.82<br>(0.67–0.98) |
| Derby            | 1971        | 0.84<br>(0.71–1.0)  |
| Derby            | 1972        | 0.85<br>(0.71–1.0)  |
| Derby            | 1973        | 0.86<br>(0.73–1.01) |
| Derby            | 1974        | 0.88<br>(0.76–1.02) |
| Derby            | 1975        | 0.89<br>(0.76–1.03) |
| Derby            | 1976        | 0.86<br>(0.74–0.98) |
| Derby            | 1977        | 0.89<br>(0.78–1.0)  |
| Derby            | 1978        | 0.93<br>(0.84–1.04) |
| Derby            | 1979        | 0.96<br>(0.88–1.06) |
| Derby            | 1980        | 0.95<br>(0.88–1.02) |
| Derby            | 1981        | 0.91<br>(0.85–0.96) |
| Derby            | 1982        | 0.95<br>(0.89–1.01) |
| Derby            | 1983        | 0.97<br>(0.92–1.03) |
| Derby            | 1984        | 0.94<br>(0.89–0.99) |
| Derby            | 1985        | 0.96<br>(0.9–1.02)  |
| Derby            | 1986        | 1.01<br>(0.95–1.08) |
| Derby            | 1987        | 1.02<br>(0.96–1.09) |
| Derby            | 1988        | 1.05<br>(0.98–1.12) |
| Derby            | 1989        | 1.03<br>(0.97–1.09) |
| Derby            | 1990        | 1.02<br>(0.97–1.08) |
| Derby            | 1991        | 1.0<br>(0.95–1.06)  |
| Derby            | 1992        | 0.95<br>(0.89–1.0)  |
| Derby            | 1993        | 0.96<br>(0.9–1.02)  |
| Derby            | 1994        | 0.97<br>(0.91–1.04) |
| Derby            | 1995        | 0.97<br>(0.9–1.04)  |

**Table 15 Ratio of adjusted to unadjusted 5q0 values for scaled locations by year**

| <b>Geography</b> | <b>Year</b> | <b>Ratio</b>        |
|------------------|-------------|---------------------|
| Derby            | 1996        | 1.0<br>(0.93–1.07)  |
| Derby            | 1997        | 0.98<br>(0.91–1.05) |
| Derby            | 1998        | 0.98<br>(0.91–1.05) |
| Derby            | 1999        | 1.01<br>(0.94–1.08) |
| Derby            | 2000        | 1.01<br>(0.91–1.11) |
| Derby            | 2001        | 0.99<br>(0.9–1.08)  |
| Derby            | 2002        | 1.0<br>(0.92–1.09)  |
| Derby            | 2003        | 1.06<br>(0.97–1.16) |
| Derby            | 2004        | 1.02<br>(0.93–1.13) |
| Derby            | 2005        | 1.02<br>(0.93–1.12) |
| Derby            | 2006        | 1.05<br>(0.96–1.16) |
| Derby            | 2007        | 1.05<br>(0.96–1.16) |
| Derby            | 2008        | 1.04<br>(0.95–1.14) |
| Derby            | 2009        | 1.02<br>(0.94–1.11) |
| Derby            | 2010        | 0.98<br>(0.91–1.06) |
| Derby            | 2011        | 0.99<br>(0.92–1.07) |
| Derby            | 2012        | 0.99<br>(0.93–1.06) |
| Derby            | 2013        | 0.97<br>(0.91–1.03) |
| Derby            | 2014        | 0.99<br>(0.92–1.07) |
| Derby            | 2015        | 1.0<br>(0.94–1.07)  |
| Derby            | 2016        | 0.99<br>(0.93–1.04) |
| Derby            | 2017        | 1.01<br>(0.9–1.13)  |
| Derbyshire       | 1950        | 0.67<br>(0.55–0.79) |
| Derbyshire       | 1951        | 0.77<br>(0.64–0.93) |
| Derbyshire       | 1952        | 0.72<br>(0.6–0.87)  |
| Derbyshire       | 1953        | 0.73<br>(0.6–0.87)  |
| Derbyshire       | 1954        | 0.68<br>(0.56–0.82) |
| Derbyshire       | 1955        | 0.69<br>(0.56–0.83) |
| Derbyshire       | 1956        | 0.68<br>(0.56–0.82) |
| Derbyshire       | 1957        | 0.69<br>(0.57–0.82) |
| Derbyshire       | 1958        | 0.68<br>(0.57–0.8)  |

**Table 15 Ratio of adjusted to unadjusted 5q0 values for scaled locations by year**

| <b>Geography</b> | <b>Year</b> | <b>Ratio</b>        |
|------------------|-------------|---------------------|
| Derbyshire       | 1959        | 0.68<br>(0.57–0.81) |
| Derbyshire       | 1960        | 0.7<br>(0.57–0.83)  |
| Derbyshire       | 1961        | 0.71<br>(0.58–0.85) |
| Derbyshire       | 1962        | 0.73<br>(0.6–0.88)  |
| Derbyshire       | 1963        | 0.74<br>(0.6–0.89)  |
| Derbyshire       | 1964        | 0.73<br>(0.59–0.87) |
| Derbyshire       | 1965        | 0.71<br>(0.58–0.85) |
| Derbyshire       | 1966        | 0.74<br>(0.59–0.88) |
| Derbyshire       | 1967        | 0.73<br>(0.59–0.88) |
| Derbyshire       | 1968        | 0.77<br>(0.62–0.92) |
| Derbyshire       | 1969        | 0.78<br>(0.64–0.94) |
| Derbyshire       | 1970        | 0.82<br>(0.67–0.98) |
| Derbyshire       | 1971        | 0.84<br>(0.71–1.0)  |
| Derbyshire       | 1972        | 0.85<br>(0.71–1.0)  |
| Derbyshire       | 1973        | 0.86<br>(0.73–1.01) |
| Derbyshire       | 1974        | 0.88<br>(0.76–1.02) |
| Derbyshire       | 1975        | 0.88<br>(0.76–1.03) |
| Derbyshire       | 1976        | 0.86<br>(0.74–0.98) |
| Derbyshire       | 1977        | 0.88<br>(0.78–1.0)  |
| Derbyshire       | 1978        | 0.93<br>(0.84–1.04) |
| Derbyshire       | 1979        | 0.96<br>(0.88–1.06) |
| Derbyshire       | 1980        | 0.95<br>(0.88–1.02) |
| Derbyshire       | 1981        | 0.91<br>(0.85–0.96) |
| Derbyshire       | 1982        | 0.95<br>(0.89–1.01) |
| Derbyshire       | 1983        | 0.97<br>(0.92–1.03) |
| Derbyshire       | 1984        | 0.94<br>(0.89–0.99) |
| Derbyshire       | 1985        | 0.96<br>(0.9–1.02)  |
| Derbyshire       | 1986        | 1.01<br>(0.95–1.08) |
| Derbyshire       | 1987        | 1.02<br>(0.96–1.09) |
| Derbyshire       | 1988        | 1.05<br>(0.98–1.12) |
| Derbyshire       | 1989        | 1.03<br>(0.97–1.09) |

**Table 15 Ratio of adjusted to unadjusted 5q0 values for scaled locations by year**

| <b>Geography</b> | <b>Year</b> | <b>Ratio</b>        |
|------------------|-------------|---------------------|
| Derbyshire       | 1990        | 1.02<br>(0.97–1.08) |
| Derbyshire       | 1991        | 1.0<br>(0.95–1.06)  |
| Derbyshire       | 1992        | 0.95<br>(0.89–1.0)  |
| Derbyshire       | 1993        | 0.96<br>(0.9–1.02)  |
| Derbyshire       | 1994        | 0.97<br>(0.91–1.04) |
| Derbyshire       | 1995        | 0.97<br>(0.9–1.04)  |
| Derbyshire       | 1996        | 1.0<br>(0.93–1.07)  |
| Derbyshire       | 1997        | 0.97<br>(0.91–1.05) |
| Derbyshire       | 1998        | 0.98<br>(0.91–1.05) |
| Derbyshire       | 1999        | 1.01<br>(0.94–1.08) |
| Derbyshire       | 2000        | 1.01<br>(0.91–1.11) |
| Derbyshire       | 2001        | 0.99<br>(0.9–1.08)  |
| Derbyshire       | 2002        | 1.0<br>(0.92–1.09)  |
| Derbyshire       | 2003        | 1.06<br>(0.97–1.16) |
| Derbyshire       | 2004        | 1.02<br>(0.93–1.13) |
| Derbyshire       | 2005        | 1.02<br>(0.93–1.12) |
| Derbyshire       | 2006        | 1.05<br>(0.96–1.16) |
| Derbyshire       | 2007        | 1.05<br>(0.96–1.16) |
| Derbyshire       | 2008        | 1.04<br>(0.95–1.14) |
| Derbyshire       | 2009        | 1.02<br>(0.94–1.11) |
| Derbyshire       | 2010        | 0.98<br>(0.91–1.06) |
| Derbyshire       | 2011        | 0.99<br>(0.92–1.07) |
| Derbyshire       | 2012        | 0.99<br>(0.93–1.06) |
| Derbyshire       | 2013        | 0.97<br>(0.91–1.03) |
| Derbyshire       | 2014        | 0.99<br>(0.92–1.07) |
| Derbyshire       | 2015        | 1.0<br>(0.94–1.07)  |
| Derbyshire       | 2016        | 0.99<br>(0.93–1.04) |
| Derbyshire       | 2017        | 1.01<br>(0.9–1.13)  |
| Leicester        | 1950        | 0.67<br>(0.55–0.8)  |
| Leicester        | 1951        | 0.77<br>(0.64–0.93) |
| Leicester        | 1952        | 0.72<br>(0.6–0.87)  |

**Table 15 Ratio of adjusted to unadjusted 5q0 values for scaled locations by year**

| <b>Geography</b> | <b>Year</b> | <b>Ratio</b>        |
|------------------|-------------|---------------------|
| Leicester        | 1953        | 0.73<br>(0.6–0.87)  |
| Leicester        | 1954        | 0.69<br>(0.56–0.82) |
| Leicester        | 1955        | 0.69<br>(0.56–0.83) |
| Leicester        | 1956        | 0.68<br>(0.56–0.82) |
| Leicester        | 1957        | 0.69<br>(0.57–0.82) |
| Leicester        | 1958        | 0.68<br>(0.57–0.8)  |
| Leicester        | 1959        | 0.68<br>(0.57–0.81) |
| Leicester        | 1960        | 0.7<br>(0.57–0.83)  |
| Leicester        | 1961        | 0.71<br>(0.58–0.85) |
| Leicester        | 1962        | 0.73<br>(0.6–0.88)  |
| Leicester        | 1963        | 0.74<br>(0.6–0.89)  |
| Leicester        | 1964        | 0.73<br>(0.59–0.87) |
| Leicester        | 1965        | 0.71<br>(0.58–0.85) |
| Leicester        | 1966        | 0.74<br>(0.6–0.88)  |
| Leicester        | 1967        | 0.73<br>(0.59–0.88) |
| Leicester        | 1968        | 0.77<br>(0.62–0.92) |
| Leicester        | 1969        | 0.78<br>(0.64–0.94) |
| Leicester        | 1970        | 0.82<br>(0.67–0.98) |
| Leicester        | 1971        | 0.84<br>(0.71–1.0)  |
| Leicester        | 1972        | 0.85<br>(0.71–1.0)  |
| Leicester        | 1973        | 0.86<br>(0.73–1.01) |
| Leicester        | 1974        | 0.88<br>(0.76–1.02) |
| Leicester        | 1975        | 0.89<br>(0.76–1.03) |
| Leicester        | 1976        | 0.86<br>(0.74–0.98) |
| Leicester        | 1977        | 0.89<br>(0.78–1.0)  |
| Leicester        | 1978        | 0.93<br>(0.84–1.04) |
| Leicester        | 1979        | 0.96<br>(0.88–1.06) |
| Leicester        | 1980        | 0.95<br>(0.88–1.02) |
| Leicester        | 1981        | 0.91<br>(0.85–0.96) |
| Leicester        | 1982        | 0.95<br>(0.89–1.01) |
| Leicester        | 1983        | 0.97<br>(0.92–1.03) |



**Table 15 Ratio of adjusted to unadjusted 5q0 values for scaled locations by year**

| <b>Geography</b> | <b>Year</b> | <b>Ratio</b>        |
|------------------|-------------|---------------------|
| Leicester        | 1984        | 0.94<br>(0.89–0.99) |
| Leicester        | 1985        | 0.96<br>(0.9–1.02)  |
| Leicester        | 1986        | 1.01<br>(0.95–1.08) |
| Leicester        | 1987        | 1.02<br>(0.96–1.09) |
| Leicester        | 1988        | 1.05<br>(0.98–1.12) |
| Leicester        | 1989        | 1.03<br>(0.97–1.09) |
| Leicester        | 1990        | 1.02<br>(0.97–1.08) |
| Leicester        | 1991        | 1.0<br>(0.95–1.06)  |
| Leicester        | 1992        | 0.95<br>(0.89–1.0)  |
| Leicester        | 1993        | 0.96<br>(0.9–1.02)  |
| Leicester        | 1994        | 0.97<br>(0.91–1.04) |
| Leicester        | 1995        | 0.97<br>(0.9–1.04)  |
| Leicester        | 1996        | 1.0<br>(0.93–1.07)  |
| Leicester        | 1997        | 0.98<br>(0.91–1.05) |
| Leicester        | 1998        | 0.98<br>(0.91–1.05) |
| Leicester        | 1999        | 1.01<br>(0.94–1.08) |
| Leicester        | 2000        | 1.01<br>(0.91–1.11) |
| Leicester        | 2001        | 0.99<br>(0.9–1.08)  |
| Leicester        | 2002        | 1.0<br>(0.92–1.09)  |
| Leicester        | 2003        | 1.06<br>(0.97–1.16) |
| Leicester        | 2004        | 1.02<br>(0.93–1.13) |
| Leicester        | 2005        | 1.02<br>(0.93–1.12) |
| Leicester        | 2006        | 1.05<br>(0.96–1.16) |
| Leicester        | 2007        | 1.05<br>(0.96–1.16) |
| Leicester        | 2008        | 1.04<br>(0.95–1.14) |
| Leicester        | 2009        | 1.02<br>(0.94–1.11) |
| Leicester        | 2010        | 0.98<br>(0.91–1.06) |
| Leicester        | 2011        | 0.99<br>(0.92–1.07) |
| Leicester        | 2012        | 0.99<br>(0.93–1.06) |
| Leicester        | 2013        | 0.97<br>(0.91–1.03) |
| Leicester        | 2014        | 0.99<br>(0.92–1.07) |

**Table 15 Ratio of adjusted to unadjusted 5q0 values for scaled locations by year**

| <b>Geography</b> | <b>Year</b> | <b>Ratio</b>        |
|------------------|-------------|---------------------|
| Leicester        | 2015        | 1.0<br>(0.94–1.07)  |
| Leicester        | 2016        | 0.99<br>(0.93–1.04) |
| Leicester        | 2017        | 1.01<br>(0.9–1.13)  |
| Leicestershire   | 1950        | 0.67<br>(0.55–0.79) |
| Leicestershire   | 1951        | 0.77<br>(0.64–0.93) |
| Leicestershire   | 1952        | 0.72<br>(0.6–0.87)  |
| Leicestershire   | 1953        | 0.73<br>(0.6–0.87)  |
| Leicestershire   | 1954        | 0.68<br>(0.56–0.82) |
| Leicestershire   | 1955        | 0.69<br>(0.56–0.83) |
| Leicestershire   | 1956        | 0.68<br>(0.56–0.82) |
| Leicestershire   | 1957        | 0.69<br>(0.57–0.82) |
| Leicestershire   | 1958        | 0.68<br>(0.57–0.8)  |
| Leicestershire   | 1959        | 0.68<br>(0.57–0.81) |
| Leicestershire   | 1960        | 0.7<br>(0.57–0.83)  |
| Leicestershire   | 1961        | 0.71<br>(0.58–0.85) |
| Leicestershire   | 1962        | 0.73<br>(0.6–0.88)  |
| Leicestershire   | 1963        | 0.74<br>(0.6–0.89)  |
| Leicestershire   | 1964        | 0.73<br>(0.59–0.87) |
| Leicestershire   | 1965        | 0.71<br>(0.58–0.85) |
| Leicestershire   | 1966        | 0.74<br>(0.59–0.88) |
| Leicestershire   | 1967        | 0.73<br>(0.59–0.88) |
| Leicestershire   | 1968        | 0.77<br>(0.62–0.92) |
| Leicestershire   | 1969        | 0.78<br>(0.64–0.94) |
| Leicestershire   | 1970        | 0.81<br>(0.67–0.98) |
| Leicestershire   | 1971        | 0.84<br>(0.71–1.0)  |
| Leicestershire   | 1972        | 0.85<br>(0.71–1.0)  |
| Leicestershire   | 1973        | 0.86<br>(0.73–1.01) |
| Leicestershire   | 1974        | 0.88<br>(0.76–1.02) |
| Leicestershire   | 1975        | 0.88<br>(0.76–1.03) |
| Leicestershire   | 1976        | 0.86<br>(0.74–0.98) |
| Leicestershire   | 1977        | 0.88<br>(0.78–1.0)  |

**Table 15 Ratio of adjusted to unadjusted 5q0 values for scaled locations by year**

| <b>Geography</b> | <b>Year</b> | <b>Ratio</b>        |
|------------------|-------------|---------------------|
| Leicestershire   | 1978        | 0.93<br>(0.84–1.04) |
| Leicestershire   | 1979        | 0.96<br>(0.88–1.06) |
| Leicestershire   | 1980        | 0.95<br>(0.88–1.02) |
| Leicestershire   | 1981        | 0.91<br>(0.85–0.96) |
| Leicestershire   | 1982        | 0.95<br>(0.89–1.01) |
| Leicestershire   | 1983        | 0.97<br>(0.92–1.03) |
| Leicestershire   | 1984        | 0.94<br>(0.89–0.99) |
| Leicestershire   | 1985        | 0.96<br>(0.9–1.02)  |
| Leicestershire   | 1986        | 1.01<br>(0.95–1.08) |
| Leicestershire   | 1987        | 1.02<br>(0.96–1.09) |
| Leicestershire   | 1988        | 1.05<br>(0.98–1.12) |
| Leicestershire   | 1989        | 1.03<br>(0.97–1.09) |
| Leicestershire   | 1990        | 1.02<br>(0.97–1.08) |
| Leicestershire   | 1991        | 1.0<br>(0.95–1.06)  |
| Leicestershire   | 1992        | 0.95<br>(0.89–1.0)  |
| Leicestershire   | 1993        | 0.96<br>(0.9–1.02)  |
| Leicestershire   | 1994        | 0.97<br>(0.91–1.04) |
| Leicestershire   | 1995        | 0.97<br>(0.9–1.04)  |
| Leicestershire   | 1996        | 1.0<br>(0.93–1.07)  |
| Leicestershire   | 1997        | 0.97<br>(0.91–1.05) |
| Leicestershire   | 1998        | 0.98<br>(0.91–1.05) |
| Leicestershire   | 1999        | 1.01<br>(0.94–1.08) |
| Leicestershire   | 2000        | 1.01<br>(0.91–1.11) |
| Leicestershire   | 2001        | 0.99<br>(0.9–1.08)  |
| Leicestershire   | 2002        | 1.0<br>(0.92–1.09)  |
| Leicestershire   | 2003        | 1.06<br>(0.97–1.16) |
| Leicestershire   | 2004        | 1.02<br>(0.93–1.13) |
| Leicestershire   | 2005        | 1.02<br>(0.93–1.12) |
| Leicestershire   | 2006        | 1.05<br>(0.96–1.16) |
| Leicestershire   | 2007        | 1.05<br>(0.96–1.16) |
| Leicestershire   | 2008        | 1.04<br>(0.95–1.14) |

**Table 15 Ratio of adjusted to unadjusted 5q0 values for scaled locations by year**

| <b>Geography</b> | <b>Year</b> | <b>Ratio</b>        |
|------------------|-------------|---------------------|
| Leicestershire   | 2009        | 1.02<br>(0.94–1.11) |
| Leicestershire   | 2010        | 0.98<br>(0.91–1.06) |
| Leicestershire   | 2011        | 0.99<br>(0.92–1.07) |
| Leicestershire   | 2012        | 0.99<br>(0.93–1.06) |
| Leicestershire   | 2013        | 0.97<br>(0.91–1.03) |
| Leicestershire   | 2014        | 0.99<br>(0.92–1.07) |
| Leicestershire   | 2015        | 1.0<br>(0.94–1.07)  |
| Leicestershire   | 2016        | 0.99<br>(0.93–1.04) |
| Leicestershire   | 2017        | 1.01<br>(0.9–1.13)  |
| Lincolnshire     | 1950        | 0.67<br>(0.55–0.79) |
| Lincolnshire     | 1951        | 0.77<br>(0.64–0.93) |
| Lincolnshire     | 1952        | 0.72<br>(0.6–0.87)  |
| Lincolnshire     | 1953        | 0.73<br>(0.6–0.87)  |
| Lincolnshire     | 1954        | 0.68<br>(0.56–0.82) |
| Lincolnshire     | 1955        | 0.69<br>(0.56–0.83) |
| Lincolnshire     | 1956        | 0.68<br>(0.56–0.82) |
| Lincolnshire     | 1957        | 0.69<br>(0.57–0.82) |
| Lincolnshire     | 1958        | 0.68<br>(0.57–0.8)  |
| Lincolnshire     | 1959        | 0.68<br>(0.57–0.81) |
| Lincolnshire     | 1960        | 0.7<br>(0.57–0.83)  |
| Lincolnshire     | 1961        | 0.71<br>(0.58–0.85) |
| Lincolnshire     | 1962        | 0.73<br>(0.6–0.88)  |
| Lincolnshire     | 1963        | 0.74<br>(0.6–0.89)  |
| Lincolnshire     | 1964        | 0.73<br>(0.59–0.87) |
| Lincolnshire     | 1965        | 0.71<br>(0.58–0.85) |
| Lincolnshire     | 1966        | 0.74<br>(0.59–0.88) |
| Lincolnshire     | 1967        | 0.73<br>(0.59–0.88) |
| Lincolnshire     | 1968        | 0.77<br>(0.62–0.92) |
| Lincolnshire     | 1969        | 0.78<br>(0.64–0.94) |
| Lincolnshire     | 1970        | 0.82<br>(0.67–0.98) |
| Lincolnshire     | 1971        | 0.84<br>(0.71–1.0)  |

**Table 15 Ratio of adjusted to unadjusted 5q0 values for scaled locations by year**

| <b>Geography</b> | <b>Year</b> | <b>Ratio</b>        |
|------------------|-------------|---------------------|
| Lincolnshire     | 1972        | 0.85<br>(0.71–1.0)  |
| Lincolnshire     | 1973        | 0.86<br>(0.73–1.01) |
| Lincolnshire     | 1974        | 0.88<br>(0.76–1.02) |
| Lincolnshire     | 1975        | 0.88<br>(0.76–1.03) |
| Lincolnshire     | 1976        | 0.86<br>(0.74–0.98) |
| Lincolnshire     | 1977        | 0.88<br>(0.78–1.0)  |
| Lincolnshire     | 1978        | 0.93<br>(0.84–1.04) |
| Lincolnshire     | 1979        | 0.96<br>(0.88–1.06) |
| Lincolnshire     | 1980        | 0.95<br>(0.88–1.02) |
| Lincolnshire     | 1981        | 0.91<br>(0.85–0.96) |
| Lincolnshire     | 1982        | 0.95<br>(0.89–1.01) |
| Lincolnshire     | 1983        | 0.97<br>(0.92–1.03) |
| Lincolnshire     | 1984        | 0.94<br>(0.89–0.99) |
| Lincolnshire     | 1985        | 0.96<br>(0.9–1.02)  |
| Lincolnshire     | 1986        | 1.01<br>(0.95–1.08) |
| Lincolnshire     | 1987        | 1.02<br>(0.96–1.09) |
| Lincolnshire     | 1988        | 1.05<br>(0.98–1.12) |
| Lincolnshire     | 1989        | 1.03<br>(0.97–1.09) |
| Lincolnshire     | 1990        | 1.02<br>(0.97–1.08) |
| Lincolnshire     | 1991        | 1.0<br>(0.95–1.06)  |
| Lincolnshire     | 1992        | 0.95<br>(0.89–1.0)  |
| Lincolnshire     | 1993        | 0.96<br>(0.9–1.02)  |
| Lincolnshire     | 1994        | 0.97<br>(0.91–1.04) |
| Lincolnshire     | 1995        | 0.97<br>(0.9–1.04)  |
| Lincolnshire     | 1996        | 1.0<br>(0.93–1.07)  |
| Lincolnshire     | 1997        | 0.97<br>(0.91–1.05) |
| Lincolnshire     | 1998        | 0.98<br>(0.91–1.05) |
| Lincolnshire     | 1999        | 1.01<br>(0.94–1.08) |
| Lincolnshire     | 2000        | 1.01<br>(0.91–1.11) |
| Lincolnshire     | 2001        | 0.99<br>(0.9–1.08)  |
| Lincolnshire     | 2002        | 1.0<br>(0.92–1.09)  |

**Table 15 Ratio of adjusted to unadjusted 5q0 values for scaled locations by year**

| <b>Geography</b> | <b>Year</b> | <b>Ratio</b>        |
|------------------|-------------|---------------------|
| Lincolnshire     | 2003        | 1.06<br>(0.97–1.16) |
| Lincolnshire     | 2004        | 1.02<br>(0.93–1.13) |
| Lincolnshire     | 2005        | 1.02<br>(0.93–1.12) |
| Lincolnshire     | 2006        | 1.05<br>(0.96–1.16) |
| Lincolnshire     | 2007        | 1.05<br>(0.96–1.16) |
| Lincolnshire     | 2008        | 1.04<br>(0.95–1.14) |
| Lincolnshire     | 2009        | 1.02<br>(0.94–1.11) |
| Lincolnshire     | 2010        | 0.98<br>(0.91–1.06) |
| Lincolnshire     | 2011        | 0.99<br>(0.92–1.07) |
| Lincolnshire     | 2012        | 0.99<br>(0.93–1.06) |
| Lincolnshire     | 2013        | 0.97<br>(0.91–1.03) |
| Lincolnshire     | 2014        | 0.99<br>(0.92–1.07) |
| Lincolnshire     | 2015        | 1.0<br>(0.94–1.07)  |
| Lincolnshire     | 2016        | 0.99<br>(0.93–1.04) |
| Lincolnshire     | 2017        | 1.01<br>(0.9–1.13)  |
| Northamptonshire | 1950        | 0.67<br>(0.55–0.79) |
| Northamptonshire | 1951        | 0.77<br>(0.64–0.93) |
| Northamptonshire | 1952        | 0.72<br>(0.6–0.87)  |
| Northamptonshire | 1953        | 0.73<br>(0.6–0.87)  |
| Northamptonshire | 1954        | 0.68<br>(0.56–0.82) |
| Northamptonshire | 1955        | 0.69<br>(0.56–0.83) |
| Northamptonshire | 1956        | 0.68<br>(0.56–0.82) |
| Northamptonshire | 1957        | 0.69<br>(0.57–0.82) |
| Northamptonshire | 1958        | 0.68<br>(0.57–0.8)  |
| Northamptonshire | 1959        | 0.68<br>(0.57–0.81) |
| Northamptonshire | 1960        | 0.7<br>(0.57–0.83)  |
| Northamptonshire | 1961        | 0.71<br>(0.58–0.85) |
| Northamptonshire | 1962        | 0.73<br>(0.6–0.88)  |
| Northamptonshire | 1963        | 0.74<br>(0.6–0.89)  |
| Northamptonshire | 1964        | 0.73<br>(0.59–0.87) |
| Northamptonshire | 1965        | 0.71<br>(0.58–0.85) |

**Table 15 Ratio of adjusted to unadjusted 5q0 values for scaled locations by year**

| <b>Geography</b> | <b>Year</b> | <b>Ratio</b>        |
|------------------|-------------|---------------------|
| Northamptonshire | 1966        | 0.74<br>(0.59–0.88) |
| Northamptonshire | 1967        | 0.73<br>(0.59–0.88) |
| Northamptonshire | 1968        | 0.77<br>(0.62–0.92) |
| Northamptonshire | 1969        | 0.78<br>(0.64–0.94) |
| Northamptonshire | 1970        | 0.82<br>(0.67–0.98) |
| Northamptonshire | 1971        | 0.84<br>(0.71–1.0)  |
| Northamptonshire | 1972        | 0.85<br>(0.71–1.0)  |
| Northamptonshire | 1973        | 0.86<br>(0.73–1.01) |
| Northamptonshire | 1974        | 0.88<br>(0.76–1.02) |
| Northamptonshire | 1975        | 0.89<br>(0.76–1.03) |
| Northamptonshire | 1976        | 0.86<br>(0.74–0.98) |
| Northamptonshire | 1977        | 0.88<br>(0.78–1.0)  |
| Northamptonshire | 1978        | 0.93<br>(0.84–1.04) |
| Northamptonshire | 1979        | 0.96<br>(0.88–1.06) |
| Northamptonshire | 1980        | 0.95<br>(0.88–1.02) |
| Northamptonshire | 1981        | 0.91<br>(0.85–0.96) |
| Northamptonshire | 1982        | 0.95<br>(0.89–1.01) |
| Northamptonshire | 1983        | 0.97<br>(0.92–1.03) |
| Northamptonshire | 1984        | 0.94<br>(0.89–0.99) |
| Northamptonshire | 1985        | 0.96<br>(0.9–1.02)  |
| Northamptonshire | 1986        | 1.01<br>(0.95–1.08) |
| Northamptonshire | 1987        | 1.02<br>(0.96–1.09) |
| Northamptonshire | 1988        | 1.05<br>(0.98–1.12) |
| Northamptonshire | 1989        | 1.03<br>(0.97–1.09) |
| Northamptonshire | 1990        | 1.02<br>(0.97–1.08) |
| Northamptonshire | 1991        | 1.0<br>(0.95–1.06)  |
| Northamptonshire | 1992        | 0.95<br>(0.89–1.0)  |
| Northamptonshire | 1993        | 0.96<br>(0.9–1.02)  |
| Northamptonshire | 1994        | 0.97<br>(0.91–1.04) |
| Northamptonshire | 1995        | 0.97<br>(0.9–1.04)  |
| Northamptonshire | 1996        | 1.0<br>(0.93–1.07)  |

**Table 15 Ratio of adjusted to unadjusted 5q0 values for scaled locations by year**

| <b>Geography</b> | <b>Year</b> | <b>Ratio</b>        |
|------------------|-------------|---------------------|
| Northamptonshire | 1997        | 0.97<br>(0.91–1.05) |
| Northamptonshire | 1998        | 0.98<br>(0.91–1.05) |
| Northamptonshire | 1999        | 1.01<br>(0.94–1.08) |
| Northamptonshire | 2000        | 1.01<br>(0.91–1.11) |
| Northamptonshire | 2001        | 0.99<br>(0.9–1.08)  |
| Northamptonshire | 2002        | 1.0<br>(0.92–1.09)  |
| Northamptonshire | 2003        | 1.06<br>(0.97–1.16) |
| Northamptonshire | 2004        | 1.02<br>(0.93–1.13) |
| Northamptonshire | 2005        | 1.02<br>(0.93–1.12) |
| Northamptonshire | 2006        | 1.05<br>(0.96–1.16) |
| Northamptonshire | 2007        | 1.05<br>(0.96–1.16) |
| Northamptonshire | 2008        | 1.04<br>(0.95–1.14) |
| Northamptonshire | 2009        | 1.02<br>(0.94–1.11) |
| Northamptonshire | 2010        | 0.98<br>(0.91–1.06) |
| Northamptonshire | 2011        | 0.99<br>(0.92–1.07) |
| Northamptonshire | 2012        | 0.99<br>(0.93–1.06) |
| Northamptonshire | 2013        | 0.97<br>(0.91–1.03) |
| Northamptonshire | 2014        | 0.99<br>(0.92–1.07) |
| Northamptonshire | 2015        | 1.0<br>(0.94–1.07)  |
| Northamptonshire | 2016        | 0.99<br>(0.93–1.04) |
| Northamptonshire | 2017        | 1.01<br>(0.9–1.13)  |
| Nottingham       | 1950        | 0.67<br>(0.55–0.8)  |
| Nottingham       | 1951        | 0.77<br>(0.64–0.93) |
| Nottingham       | 1952        | 0.72<br>(0.6–0.87)  |
| Nottingham       | 1953        | 0.73<br>(0.6–0.87)  |
| Nottingham       | 1954        | 0.69<br>(0.56–0.82) |
| Nottingham       | 1955        | 0.69<br>(0.56–0.83) |
| Nottingham       | 1956        | 0.68<br>(0.56–0.82) |
| Nottingham       | 1957        | 0.69<br>(0.57–0.82) |
| Nottingham       | 1958        | 0.68<br>(0.57–0.8)  |
| Nottingham       | 1959        | 0.68<br>(0.57–0.81) |



**Table 15 Ratio of adjusted to unadjusted 5q0 values for scaled locations by year**

| <b>Geography</b> | <b>Year</b> | <b>Ratio</b>        |
|------------------|-------------|---------------------|
| Nottingham       | 1960        | 0.7<br>(0.57–0.83)  |
| Nottingham       | 1961        | 0.71<br>(0.58–0.85) |
| Nottingham       | 1962        | 0.73<br>(0.6–0.88)  |
| Nottingham       | 1963        | 0.74<br>(0.6–0.89)  |
| Nottingham       | 1964        | 0.73<br>(0.59–0.87) |
| Nottingham       | 1965        | 0.71<br>(0.58–0.85) |
| Nottingham       | 1966        | 0.74<br>(0.59–0.88) |
| Nottingham       | 1967        | 0.73<br>(0.59–0.88) |
| Nottingham       | 1968        | 0.77<br>(0.62–0.92) |
| Nottingham       | 1969        | 0.78<br>(0.64–0.94) |
| Nottingham       | 1970        | 0.82<br>(0.67–0.98) |
| Nottingham       | 1971        | 0.84<br>(0.71–1.0)  |
| Nottingham       | 1972        | 0.85<br>(0.71–1.0)  |
| Nottingham       | 1973        | 0.86<br>(0.73–1.01) |
| Nottingham       | 1974        | 0.88<br>(0.76–1.02) |
| Nottingham       | 1975        | 0.89<br>(0.76–1.03) |
| Nottingham       | 1976        | 0.86<br>(0.74–0.98) |
| Nottingham       | 1977        | 0.89<br>(0.78–1.0)  |
| Nottingham       | 1978        | 0.93<br>(0.84–1.04) |
| Nottingham       | 1979        | 0.96<br>(0.88–1.06) |
| Nottingham       | 1980        | 0.95<br>(0.88–1.02) |
| Nottingham       | 1981        | 0.91<br>(0.85–0.96) |
| Nottingham       | 1982        | 0.95<br>(0.89–1.01) |
| Nottingham       | 1983        | 0.97<br>(0.92–1.03) |
| Nottingham       | 1984        | 0.94<br>(0.89–0.99) |
| Nottingham       | 1985        | 0.96<br>(0.9–1.02)  |
| Nottingham       | 1986        | 1.01<br>(0.95–1.08) |
| Nottingham       | 1987        | 1.02<br>(0.96–1.09) |
| Nottingham       | 1988        | 1.05<br>(0.98–1.12) |
| Nottingham       | 1989        | 1.03<br>(0.97–1.09) |
| Nottingham       | 1990        | 1.02<br>(0.97–1.08) |

**Table 15 Ratio of adjusted to unadjusted 5q0 values for scaled locations by year**

| <b>Geography</b> | <b>Year</b> | <b>Ratio</b>        |
|------------------|-------------|---------------------|
| Nottingham       | 1991        | 1.0<br>(0.95–1.06)  |
| Nottingham       | 1992        | 0.95<br>(0.89–1.0)  |
| Nottingham       | 1993        | 0.96<br>(0.9–1.02)  |
| Nottingham       | 1994        | 0.97<br>(0.91–1.04) |
| Nottingham       | 1995        | 0.97<br>(0.9–1.04)  |
| Nottingham       | 1996        | 1.0<br>(0.93–1.07)  |
| Nottingham       | 1997        | 0.98<br>(0.91–1.05) |
| Nottingham       | 1998        | 0.98<br>(0.91–1.05) |
| Nottingham       | 1999        | 1.01<br>(0.94–1.08) |
| Nottingham       | 2000        | 1.01<br>(0.91–1.11) |
| Nottingham       | 2001        | 0.99<br>(0.9–1.08)  |
| Nottingham       | 2002        | 1.0<br>(0.92–1.09)  |
| Nottingham       | 2003        | 1.06<br>(0.97–1.16) |
| Nottingham       | 2004        | 1.02<br>(0.93–1.12) |
| Nottingham       | 2005        | 1.02<br>(0.93–1.12) |
| Nottingham       | 2006        | 1.05<br>(0.96–1.16) |
| Nottingham       | 2007        | 1.05<br>(0.96–1.16) |
| Nottingham       | 2008        | 1.04<br>(0.95–1.14) |
| Nottingham       | 2009        | 1.02<br>(0.94–1.11) |
| Nottingham       | 2010        | 0.98<br>(0.91–1.06) |
| Nottingham       | 2011        | 0.99<br>(0.92–1.07) |
| Nottingham       | 2012        | 0.99<br>(0.93–1.06) |
| Nottingham       | 2013        | 0.97<br>(0.91–1.03) |
| Nottingham       | 2014        | 0.99<br>(0.92–1.07) |
| Nottingham       | 2015        | 1.0<br>(0.94–1.07)  |
| Nottingham       | 2016        | 0.99<br>(0.93–1.04) |
| Nottingham       | 2017        | 1.01<br>(0.9–1.13)  |
| Nottinghamshire  | 1950        | 0.67<br>(0.55–0.79) |
| Nottinghamshire  | 1951        | 0.77<br>(0.64–0.93) |
| Nottinghamshire  | 1952        | 0.72<br>(0.6–0.87)  |
| Nottinghamshire  | 1953        | 0.73<br>(0.6–0.87)  |

**Table 15 Ratio of adjusted to unadjusted 5q0 values for scaled locations by year**

| <b>Geography</b> | <b>Year</b> | <b>Ratio</b>        |
|------------------|-------------|---------------------|
| Nottinghamshire  | 1954        | 0.68<br>(0.56–0.82) |
| Nottinghamshire  | 1955        | 0.69<br>(0.56–0.83) |
| Nottinghamshire  | 1956        | 0.68<br>(0.56–0.82) |
| Nottinghamshire  | 1957        | 0.69<br>(0.57–0.82) |
| Nottinghamshire  | 1958        | 0.68<br>(0.57–0.8)  |
| Nottinghamshire  | 1959        | 0.68<br>(0.57–0.81) |
| Nottinghamshire  | 1960        | 0.7<br>(0.57–0.83)  |
| Nottinghamshire  | 1961        | 0.71<br>(0.58–0.85) |
| Nottinghamshire  | 1962        | 0.73<br>(0.6–0.88)  |
| Nottinghamshire  | 1963        | 0.74<br>(0.6–0.89)  |
| Nottinghamshire  | 1964        | 0.73<br>(0.59–0.87) |
| Nottinghamshire  | 1965        | 0.71<br>(0.58–0.85) |
| Nottinghamshire  | 1966        | 0.74<br>(0.59–0.88) |
| Nottinghamshire  | 1967        | 0.73<br>(0.59–0.88) |
| Nottinghamshire  | 1968        | 0.77<br>(0.62–0.92) |
| Nottinghamshire  | 1969        | 0.78<br>(0.64–0.94) |
| Nottinghamshire  | 1970        | 0.82<br>(0.67–0.98) |
| Nottinghamshire  | 1971        | 0.84<br>(0.71–1.0)  |
| Nottinghamshire  | 1972        | 0.85<br>(0.71–1.0)  |
| Nottinghamshire  | 1973        | 0.86<br>(0.73–1.01) |
| Nottinghamshire  | 1974        | 0.88<br>(0.76–1.02) |
| Nottinghamshire  | 1975        | 0.88<br>(0.76–1.03) |
| Nottinghamshire  | 1976        | 0.86<br>(0.74–0.98) |
| Nottinghamshire  | 1977        | 0.88<br>(0.78–1.0)  |
| Nottinghamshire  | 1978        | 0.93<br>(0.84–1.04) |
| Nottinghamshire  | 1979        | 0.96<br>(0.88–1.06) |
| Nottinghamshire  | 1980        | 0.95<br>(0.88–1.02) |
| Nottinghamshire  | 1981        | 0.91<br>(0.85–0.96) |
| Nottinghamshire  | 1982        | 0.95<br>(0.89–1.01) |
| Nottinghamshire  | 1983        | 0.97<br>(0.92–1.03) |
| Nottinghamshire  | 1984        | 0.94<br>(0.89–0.99) |

**Table 15 Ratio of adjusted to unadjusted 5q0 values for scaled locations by year**

| <b>Geography</b> | <b>Year</b> | <b>Ratio</b>        |
|------------------|-------------|---------------------|
| Nottinghamshire  | 1985        | 0.96<br>(0.9–1.02)  |
| Nottinghamshire  | 1986        | 1.01<br>(0.95–1.08) |
| Nottinghamshire  | 1987        | 1.02<br>(0.96–1.09) |
| Nottinghamshire  | 1988        | 1.05<br>(0.98–1.12) |
| Nottinghamshire  | 1989        | 1.03<br>(0.97–1.09) |
| Nottinghamshire  | 1990        | 1.02<br>(0.97–1.08) |
| Nottinghamshire  | 1991        | 1.0<br>(0.95–1.06)  |
| Nottinghamshire  | 1992        | 0.95<br>(0.89–1.0)  |
| Nottinghamshire  | 1993        | 0.96<br>(0.9–1.02)  |
| Nottinghamshire  | 1994        | 0.97<br>(0.91–1.04) |
| Nottinghamshire  | 1995        | 0.97<br>(0.9–1.04)  |
| Nottinghamshire  | 1996        | 1.0<br>(0.93–1.07)  |
| Nottinghamshire  | 1997        | 0.97<br>(0.91–1.05) |
| Nottinghamshire  | 1998        | 0.98<br>(0.91–1.05) |
| Nottinghamshire  | 1999        | 1.01<br>(0.94–1.08) |
| Nottinghamshire  | 2000        | 1.01<br>(0.91–1.11) |
| Nottinghamshire  | 2001        | 0.99<br>(0.9–1.08)  |
| Nottinghamshire  | 2002        | 1.0<br>(0.92–1.09)  |
| Nottinghamshire  | 2003        | 1.06<br>(0.97–1.16) |
| Nottinghamshire  | 2004        | 1.02<br>(0.93–1.13) |
| Nottinghamshire  | 2005        | 1.02<br>(0.93–1.12) |
| Nottinghamshire  | 2006        | 1.05<br>(0.96–1.16) |
| Nottinghamshire  | 2007        | 1.05<br>(0.96–1.16) |
| Nottinghamshire  | 2008        | 1.04<br>(0.95–1.14) |
| Nottinghamshire  | 2009        | 1.02<br>(0.94–1.11) |
| Nottinghamshire  | 2010        | 0.98<br>(0.91–1.06) |
| Nottinghamshire  | 2011        | 0.99<br>(0.92–1.07) |
| Nottinghamshire  | 2012        | 0.99<br>(0.93–1.06) |
| Nottinghamshire  | 2013        | 0.97<br>(0.91–1.03) |
| Nottinghamshire  | 2014        | 0.99<br>(0.92–1.07) |
| Nottinghamshire  | 2015        | 1.0<br>(0.94–1.07)  |

**Table 15 Ratio of adjusted to unadjusted 5q0 values for scaled locations by year**

| <b>Geography</b> | <b>Year</b> | <b>Ratio</b>        |
|------------------|-------------|---------------------|
| Nottinghamshire  | 2016        | 0.99<br>(0.93–1.04) |
| Nottinghamshire  | 2017        | 1.01<br>(0.9–1.13)  |
| Rutland          | 1950        | 0.66<br>(0.55–0.79) |
| Rutland          | 1951        | 0.77<br>(0.64–0.93) |
| Rutland          | 1952        | 0.72<br>(0.6–0.87)  |
| Rutland          | 1953        | 0.73<br>(0.59–0.87) |
| Rutland          | 1954        | 0.68<br>(0.56–0.82) |
| Rutland          | 1955        | 0.68<br>(0.56–0.83) |
| Rutland          | 1956        | 0.67<br>(0.55–0.82) |
| Rutland          | 1957        | 0.69<br>(0.57–0.82) |
| Rutland          | 1958        | 0.68<br>(0.57–0.8)  |
| Rutland          | 1959        | 0.68<br>(0.57–0.81) |
| Rutland          | 1960        | 0.7<br>(0.57–0.83)  |
| Rutland          | 1961        | 0.71<br>(0.58–0.84) |
| Rutland          | 1962        | 0.73<br>(0.6–0.87)  |
| Rutland          | 1963        | 0.74<br>(0.6–0.89)  |
| Rutland          | 1964        | 0.72<br>(0.59–0.87) |
| Rutland          | 1965        | 0.71<br>(0.58–0.85) |
| Rutland          | 1966        | 0.74<br>(0.59–0.88) |
| Rutland          | 1967        | 0.73<br>(0.59–0.88) |
| Rutland          | 1968        | 0.77<br>(0.62–0.92) |
| Rutland          | 1969        | 0.78<br>(0.64–0.94) |
| Rutland          | 1970        | 0.81<br>(0.67–0.98) |
| Rutland          | 1971        | 0.84<br>(0.71–1.0)  |
| Rutland          | 1972        | 0.85<br>(0.71–1.0)  |
| Rutland          | 1973        | 0.86<br>(0.73–1.01) |
| Rutland          | 1974        | 0.88<br>(0.76–1.02) |
| Rutland          | 1975        | 0.88<br>(0.76–1.03) |
| Rutland          | 1976        | 0.86<br>(0.74–0.98) |
| Rutland          | 1977        | 0.88<br>(0.78–1.0)  |
| Rutland          | 1978        | 0.93<br>(0.84–1.04) |

**Table 15 Ratio of adjusted to unadjusted 5q0 values for scaled locations by year**

| <b>Geography</b> | <b>Year</b> | <b>Ratio</b>        |
|------------------|-------------|---------------------|
| Rutland          | 1979        | 0.96<br>(0.88–1.06) |
| Rutland          | 1980        | 0.95<br>(0.88–1.02) |
| Rutland          | 1981        | 0.91<br>(0.85–0.96) |
| Rutland          | 1982        | 0.95<br>(0.89–1.01) |
| Rutland          | 1983        | 0.97<br>(0.92–1.03) |
| Rutland          | 1984        | 0.94<br>(0.89–0.99) |
| Rutland          | 1985        | 0.96<br>(0.9–1.02)  |
| Rutland          | 1986        | 1.01<br>(0.95–1.08) |
| Rutland          | 1987        | 1.02<br>(0.96–1.09) |
| Rutland          | 1988        | 1.05<br>(0.98–1.12) |
| Rutland          | 1989        | 1.03<br>(0.97–1.09) |
| Rutland          | 1990        | 1.02<br>(0.97–1.08) |
| Rutland          | 1991        | 1.0<br>(0.95–1.06)  |
| Rutland          | 1992        | 0.95<br>(0.89–1.0)  |
| Rutland          | 1993        | 0.96<br>(0.9–1.02)  |
| Rutland          | 1994        | 0.97<br>(0.91–1.04) |
| Rutland          | 1995        | 0.97<br>(0.9–1.04)  |
| Rutland          | 1996        | 1.0<br>(0.93–1.07)  |
| Rutland          | 1997        | 0.97<br>(0.91–1.05) |
| Rutland          | 1998        | 0.98<br>(0.91–1.05) |
| Rutland          | 1999        | 1.01<br>(0.94–1.08) |
| Rutland          | 2000        | 1.01<br>(0.91–1.11) |
| Rutland          | 2001        | 0.99<br>(0.9–1.08)  |
| Rutland          | 2002        | 1.0<br>(0.92–1.1)   |
| Rutland          | 2003        | 1.06<br>(0.97–1.16) |
| Rutland          | 2004        | 1.02<br>(0.93–1.13) |
| Rutland          | 2005        | 1.02<br>(0.93–1.12) |
| Rutland          | 2006        | 1.05<br>(0.96–1.16) |
| Rutland          | 2007        | 1.05<br>(0.96–1.16) |
| Rutland          | 2008        | 1.04<br>(0.95–1.14) |
| Rutland          | 2009        | 1.02<br>(0.94–1.11) |

**Table 15 Ratio of adjusted to unadjusted 5q0 values for scaled locations by year**

| <b>Geography</b> | <b>Year</b> | <b>Ratio</b>        |
|------------------|-------------|---------------------|
| Rutland          | 2010        | 0.98<br>(0.91–1.06) |
| Rutland          | 2011        | 0.99<br>(0.92–1.07) |
| Rutland          | 2012        | 0.99<br>(0.93–1.06) |
| Rutland          | 2013        | 0.97<br>(0.91–1.03) |
| Rutland          | 2014        | 0.99<br>(0.92–1.07) |
| Rutland          | 2015        | 1.0<br>(0.94–1.07)  |
| Rutland          | 2016        | 0.99<br>(0.93–1.04) |
| Rutland          | 2017        | 1.01<br>(0.9–1.13)  |
| East of England  | 1950        | 0.9<br>(0.74–1.08)  |
| East of England  | 1951        | 1.04<br>(0.85–1.25) |
| East of England  | 1952        | 0.97<br>(0.8–1.17)  |
| East of England  | 1953        | 0.98<br>(0.81–1.17) |
| East of England  | 1954        | 0.91<br>(0.75–1.1)  |
| East of England  | 1955        | 0.91<br>(0.74–1.11) |
| East of England  | 1956        | 0.89<br>(0.73–1.09) |
| East of England  | 1957        | 0.9<br>(0.73–1.1)   |
| East of England  | 1958        | 0.88<br>(0.71–1.07) |
| East of England  | 1959        | 0.87<br>(0.71–1.06) |
| East of England  | 1960        | 0.88<br>(0.71–1.06) |
| East of England  | 1961        | 0.89<br>(0.72–1.07) |
| East of England  | 1962        | 0.91<br>(0.74–1.09) |
| East of England  | 1963        | 0.91<br>(0.75–1.09) |
| East of England  | 1964        | 0.88<br>(0.72–1.05) |
| East of England  | 1965        | 0.85<br>(0.69–1.02) |
| East of England  | 1966        | 0.87<br>(0.71–1.04) |
| East of England  | 1967        | 0.85<br>(0.69–1.02) |
| East of England  | 1968        | 0.88<br>(0.72–1.05) |
| East of England  | 1969        | 0.89<br>(0.73–1.06) |
| East of England  | 1970        | 0.91<br>(0.76–1.08) |
| East of England  | 1971        | 0.93<br>(0.78–1.1)  |
| East of England  | 1972        | 0.93<br>(0.78–1.11) |

**Table 15 Ratio of adjusted to unadjusted 5q0 values for scaled locations by year**

| <b>Geography</b> | <b>Year</b> | <b>Ratio</b>        |
|------------------|-------------|---------------------|
| East of England  | 1973        | 0.93<br>(0.78–1.12) |
| East of England  | 1974        | 0.94<br>(0.79–1.11) |
| East of England  | 1975        | 0.93<br>(0.79–1.1)  |
| East of England  | 1976        | 0.9<br>(0.77–1.04)  |
| East of England  | 1977        | 0.92<br>(0.8–1.04)  |
| East of England  | 1978        | 0.96<br>(0.85–1.08) |
| East of England  | 1979        | 0.98<br>(0.9–1.08)  |
| East of England  | 1980        | 0.97<br>(0.9–1.04)  |
| East of England  | 1981        | 0.93<br>(0.89–0.97) |
| East of England  | 1982        | 0.98<br>(0.95–1.01) |
| East of England  | 1983        | 1.0<br>(0.97–1.03)  |
| East of England  | 1984        | 0.98<br>(0.95–1.01) |
| East of England  | 1985        | 0.99<br>(0.95–1.02) |
| East of England  | 1986        | 0.99<br>(0.97–1.02) |
| East of England  | 1987        | 0.99<br>(0.96–1.01) |
| East of England  | 1988        | 1.0<br>(0.97–1.03)  |
| East of England  | 1989        | 0.99<br>(0.97–1.01) |
| East of England  | 1990        | 1.0<br>(0.98–1.02)  |
| East of England  | 1991        | 1.0<br>(0.98–1.02)  |
| East of England  | 1992        | 0.97<br>(0.95–1.0)  |
| East of England  | 1993        | 1.0<br>(0.97–1.02)  |
| East of England  | 1994        | 1.01<br>(0.98–1.04) |
| East of England  | 1995        | 1.02<br>(0.99–1.05) |
| East of England  | 1996        | 1.04<br>(1.01–1.06) |
| East of England  | 1997        | 1.01<br>(0.97–1.05) |
| East of England  | 1998        | 1.0<br>(0.96–1.03)  |
| East of England  | 1999        | 1.02<br>(0.99–1.06) |
| East of England  | 2000        | 1.01<br>(0.95–1.09) |
| East of England  | 2001        | 1.0<br>(0.96–1.04)  |
| East of England  | 2002        | 0.98<br>(0.95–1.02) |
| East of England  | 2003        | 1.02<br>(0.98–1.06) |



**Table 15 Ratio of adjusted to unadjusted 5q0 values for scaled locations by year**

| <b>Geography</b> | <b>Year</b> | <b>Ratio</b>        |
|------------------|-------------|---------------------|
| East of England  | 2004        | 0.99<br>(0.96–1.02) |
| East of England  | 2005        | 0.99<br>(0.95–1.03) |
| East of England  | 2006        | 1.01<br>(0.97–1.05) |
| East of England  | 2007        | 1.01<br>(0.98–1.05) |
| East of England  | 2008        | 1.01<br>(0.98–1.04) |
| East of England  | 2009        | 1.0<br>(0.96–1.04)  |
| East of England  | 2010        | 0.98<br>(0.95–1.02) |
| East of England  | 2011        | 1.0<br>(0.96–1.04)  |
| East of England  | 2012        | 1.0<br>(0.96–1.04)  |
| East of England  | 2013        | 0.99<br>(0.95–1.02) |
| East of England  | 2014        | 0.99<br>(0.95–1.03) |
| East of England  | 2015        | 1.0<br>(0.96–1.04)  |
| East of England  | 2016        | 1.0<br>(0.94–1.05)  |
| East of England  | 2017        | 1.02<br>(0.92–1.14) |
| Bedford          | 1950        | 0.7<br>(0.57–0.83)  |
| Bedford          | 1951        | 0.81<br>(0.67–0.97) |
| Bedford          | 1952        | 0.76<br>(0.62–0.9)  |
| Bedford          | 1953        | 0.76<br>(0.63–0.91) |
| Bedford          | 1954        | 0.71<br>(0.59–0.85) |
| Bedford          | 1955        | 0.71<br>(0.59–0.85) |
| Bedford          | 1956        | 0.7<br>(0.59–0.83)  |
| Bedford          | 1957        | 0.71<br>(0.61–0.83) |
| Bedford          | 1958        | 0.7<br>(0.61–0.81)  |
| Bedford          | 1959        | 0.71<br>(0.61–0.82) |
| Bedford          | 1960        | 0.72<br>(0.61–0.85) |
| Bedford          | 1961        | 0.73<br>(0.61–0.88) |
| Bedford          | 1962        | 0.76<br>(0.63–0.9)  |
| Bedford          | 1963        | 0.76<br>(0.63–0.91) |
| Bedford          | 1964        | 0.75<br>(0.61–0.89) |
| Bedford          | 1965        | 0.73<br>(0.6–0.87)  |
| Bedford          | 1966        | 0.76<br>(0.61–0.9)  |

**Table 15 Ratio of adjusted to unadjusted 5q0 values for scaled locations by year**

| <b>Geography</b> | <b>Year</b> | <b>Ratio</b>        |
|------------------|-------------|---------------------|
| Bedford          | 1967        | 0.75<br>(0.6–0.9)   |
| Bedford          | 1968        | 0.78<br>(0.63–0.94) |
| Bedford          | 1969        | 0.8<br>(0.65–0.95)  |
| Bedford          | 1970        | 0.83<br>(0.69–0.98) |
| Bedford          | 1971        | 0.86<br>(0.72–1.0)  |
| Bedford          | 1972        | 0.86<br>(0.73–1.01) |
| Bedford          | 1973        | 0.87<br>(0.74–1.0)  |
| Bedford          | 1974        | 0.89<br>(0.76–1.02) |
| Bedford          | 1975        | 0.89<br>(0.77–1.03) |
| Bedford          | 1976        | 0.86<br>(0.75–0.99) |
| Bedford          | 1977        | 0.89<br>(0.79–1.0)  |
| Bedford          | 1978        | 0.94<br>(0.85–1.04) |
| Bedford          | 1979        | 0.96<br>(0.87–1.06) |
| Bedford          | 1980        | 0.95<br>(0.87–1.04) |
| Bedford          | 1981        | 0.91<br>(0.85–0.98) |
| Bedford          | 1982        | 0.96<br>(0.89–1.03) |
| Bedford          | 1983        | 0.96<br>(0.9–1.03)  |
| Bedford          | 1984        | 0.96<br>(0.9–1.02)  |
| Bedford          | 1985        | 0.99<br>(0.93–1.05) |
| Bedford          | 1986        | 1.02<br>(0.95–1.08) |
| Bedford          | 1987        | 1.02<br>(0.96–1.09) |
| Bedford          | 1988        | 1.03<br>(0.97–1.1)  |
| Bedford          | 1989        | 1.0<br>(0.94–1.06)  |
| Bedford          | 1990        | 0.98<br>(0.93–1.04) |
| Bedford          | 1991        | 0.96<br>(0.91–1.02) |
| Bedford          | 1992        | 0.92<br>(0.86–0.98) |
| Bedford          | 1993        | 0.95<br>(0.88–1.02) |
| Bedford          | 1994        | 0.98<br>(0.91–1.05) |
| Bedford          | 1995        | 0.99<br>(0.92–1.07) |
| Bedford          | 1996        | 1.03<br>(0.96–1.1)  |
| Bedford          | 1997        | 1.0<br>(0.93–1.07)  |

**Table 15 Ratio of adjusted to unadjusted 5q0 values for scaled locations by year**

| <b>Geography</b> | <b>Year</b> | <b>Ratio</b>        |
|------------------|-------------|---------------------|
| Bedford          | 1998        | 0.99<br>(0.92–1.06) |
| Bedford          | 1999        | 1.01<br>(0.94–1.08) |
| Bedford          | 2000        | 0.99<br>(0.9–1.08)  |
| Bedford          | 2001        | 0.98<br>(0.91–1.07) |
| Bedford          | 2002        | 0.98<br>(0.92–1.05) |
| Bedford          | 2003        | 1.03<br>(0.94–1.12) |
| Bedford          | 2004        | 1.0<br>(0.91–1.1)   |
| Bedford          | 2005        | 1.01<br>(0.92–1.1)  |
| Bedford          | 2006        | 1.04<br>(0.95–1.14) |
| Bedford          | 2007        | 1.05<br>(0.96–1.16) |
| Bedford          | 2008        | 1.04<br>(0.95–1.14) |
| Bedford          | 2009        | 1.02<br>(0.94–1.11) |
| Bedford          | 2010        | 0.99<br>(0.92–1.05) |
| Bedford          | 2011        | 1.02<br>(0.94–1.09) |
| Bedford          | 2012        | 1.01<br>(0.93–1.08) |
| Bedford          | 2013        | 0.96<br>(0.89–1.04) |
| Bedford          | 2014        | 0.97<br>(0.89–1.06) |
| Bedford          | 2015        | 0.97<br>(0.89–1.05) |
| Bedford          | 2016        | 0.97<br>(0.9–1.03)  |
| Bedford          | 2017        | 0.99<br>(0.88–1.11) |
| Cambridgeshire   | 1950        | 0.69<br>(0.57–0.83) |
| Cambridgeshire   | 1951        | 0.81<br>(0.66–0.97) |
| Cambridgeshire   | 1952        | 0.75<br>(0.62–0.9)  |
| Cambridgeshire   | 1953        | 0.76<br>(0.63–0.91) |
| Cambridgeshire   | 1954        | 0.71<br>(0.59–0.85) |
| Cambridgeshire   | 1955        | 0.71<br>(0.59–0.85) |
| Cambridgeshire   | 1956        | 0.7<br>(0.59–0.83)  |
| Cambridgeshire   | 1957        | 0.71<br>(0.61–0.83) |
| Cambridgeshire   | 1958        | 0.7<br>(0.61–0.81)  |
| Cambridgeshire   | 1959        | 0.7<br>(0.61–0.82)  |
| Cambridgeshire   | 1960        | 0.72<br>(0.61–0.85) |

**Table 15 Ratio of adjusted to unadjusted 5q0 values for scaled locations by year**

| <b>Geography</b> | <b>Year</b> | <b>Ratio</b>        |
|------------------|-------------|---------------------|
| Cambridgeshire   | 1961        | 0.73<br>(0.61–0.88) |
| Cambridgeshire   | 1962        | 0.76<br>(0.63–0.9)  |
| Cambridgeshire   | 1963        | 0.76<br>(0.63–0.91) |
| Cambridgeshire   | 1964        | 0.75<br>(0.61–0.89) |
| Cambridgeshire   | 1965        | 0.73<br>(0.6–0.87)  |
| Cambridgeshire   | 1966        | 0.75<br>(0.61–0.9)  |
| Cambridgeshire   | 1967        | 0.75<br>(0.6–0.9)   |
| Cambridgeshire   | 1968        | 0.78<br>(0.63–0.94) |
| Cambridgeshire   | 1969        | 0.8<br>(0.65–0.95)  |
| Cambridgeshire   | 1970        | 0.83<br>(0.68–0.98) |
| Cambridgeshire   | 1971        | 0.86<br>(0.72–1.0)  |
| Cambridgeshire   | 1972        | 0.86<br>(0.73–1.01) |
| Cambridgeshire   | 1973        | 0.87<br>(0.74–1.0)  |
| Cambridgeshire   | 1974        | 0.89<br>(0.76–1.02) |
| Cambridgeshire   | 1975        | 0.89<br>(0.77–1.03) |
| Cambridgeshire   | 1976        | 0.86<br>(0.75–0.99) |
| Cambridgeshire   | 1977        | 0.89<br>(0.78–1.0)  |
| Cambridgeshire   | 1978        | 0.94<br>(0.85–1.04) |
| Cambridgeshire   | 1979        | 0.96<br>(0.87–1.06) |
| Cambridgeshire   | 1980        | 0.95<br>(0.87–1.04) |
| Cambridgeshire   | 1981        | 0.91<br>(0.85–0.98) |
| Cambridgeshire   | 1982        | 0.96<br>(0.89–1.03) |
| Cambridgeshire   | 1983        | 0.96<br>(0.9–1.03)  |
| Cambridgeshire   | 1984        | 0.96<br>(0.9–1.02)  |
| Cambridgeshire   | 1985        | 0.99<br>(0.93–1.05) |
| Cambridgeshire   | 1986        | 1.02<br>(0.95–1.08) |
| Cambridgeshire   | 1987        | 1.02<br>(0.96–1.09) |
| Cambridgeshire   | 1988        | 1.03<br>(0.97–1.1)  |
| Cambridgeshire   | 1989        | 1.0<br>(0.94–1.06)  |
| Cambridgeshire   | 1990        | 0.98<br>(0.93–1.04) |
| Cambridgeshire   | 1991        | 0.96<br>(0.91–1.02) |

**Table 15 Ratio of adjusted to unadjusted 5q0 values for scaled locations by year**

| <b>Geography</b>     | <b>Year</b> | <b>Ratio</b>        |
|----------------------|-------------|---------------------|
| Cambridgeshire       | 1992        | 0.92<br>(0.86–0.98) |
| Cambridgeshire       | 1993        | 0.95<br>(0.88–1.02) |
| Cambridgeshire       | 1994        | 0.98<br>(0.91–1.05) |
| Cambridgeshire       | 1995        | 0.99<br>(0.92–1.07) |
| Cambridgeshire       | 1996        | 1.03<br>(0.96–1.1)  |
| Cambridgeshire       | 1997        | 1.0<br>(0.93–1.07)  |
| Cambridgeshire       | 1998        | 0.99<br>(0.92–1.06) |
| Cambridgeshire       | 1999        | 1.01<br>(0.94–1.08) |
| Cambridgeshire       | 2000        | 0.99<br>(0.9–1.08)  |
| Cambridgeshire       | 2001        | 0.98<br>(0.91–1.07) |
| Cambridgeshire       | 2002        | 0.98<br>(0.92–1.05) |
| Cambridgeshire       | 2003        | 1.03<br>(0.94–1.12) |
| Cambridgeshire       | 2004        | 1.0<br>(0.91–1.1)   |
| Cambridgeshire       | 2005        | 1.01<br>(0.92–1.1)  |
| Cambridgeshire       | 2006        | 1.04<br>(0.95–1.14) |
| Cambridgeshire       | 2007        | 1.05<br>(0.96–1.16) |
| Cambridgeshire       | 2008        | 1.04<br>(0.95–1.14) |
| Cambridgeshire       | 2009        | 1.02<br>(0.94–1.11) |
| Cambridgeshire       | 2010        | 0.99<br>(0.92–1.05) |
| Cambridgeshire       | 2011        | 1.02<br>(0.94–1.09) |
| Cambridgeshire       | 2012        | 1.01<br>(0.93–1.08) |
| Cambridgeshire       | 2013        | 0.96<br>(0.89–1.04) |
| Cambridgeshire       | 2014        | 0.97<br>(0.89–1.06) |
| Cambridgeshire       | 2015        | 0.97<br>(0.89–1.05) |
| Cambridgeshire       | 2016        | 0.97<br>(0.9–1.03)  |
| Cambridgeshire       | 2017        | 0.99<br>(0.88–1.11) |
| Central Bedfordshire | 1950        | 0.7<br>(0.57–0.83)  |
| Central Bedfordshire | 1951        | 0.81<br>(0.66–0.97) |
| Central Bedfordshire | 1952        | 0.76<br>(0.62–0.9)  |
| Central Bedfordshire | 1953        | 0.76<br>(0.63–0.91) |
| Central Bedfordshire | 1954        | 0.71<br>(0.59–0.85) |

**Table 15 Ratio of adjusted to unadjusted 5q0 values for scaled locations by year**

| <b>Geography</b>     | <b>Year</b> | <b>Ratio</b>        |
|----------------------|-------------|---------------------|
| Central Bedfordshire | 1955        | 0.71<br>(0.59–0.85) |
| Central Bedfordshire | 1956        | 0.7<br>(0.59–0.83)  |
| Central Bedfordshire | 1957        | 0.71<br>(0.61–0.83) |
| Central Bedfordshire | 1958        | 0.7<br>(0.61–0.81)  |
| Central Bedfordshire | 1959        | 0.71<br>(0.61–0.82) |
| Central Bedfordshire | 1960        | 0.72<br>(0.61–0.85) |
| Central Bedfordshire | 1961        | 0.73<br>(0.61–0.88) |
| Central Bedfordshire | 1962        | 0.76<br>(0.63–0.9)  |
| Central Bedfordshire | 1963        | 0.76<br>(0.63–0.91) |
| Central Bedfordshire | 1964        | 0.75<br>(0.61–0.89) |
| Central Bedfordshire | 1965        | 0.73<br>(0.6–0.87)  |
| Central Bedfordshire | 1966        | 0.75<br>(0.61–0.9)  |
| Central Bedfordshire | 1967        | 0.75<br>(0.6–0.9)   |
| Central Bedfordshire | 1968        | 0.78<br>(0.63–0.94) |
| Central Bedfordshire | 1969        | 0.8<br>(0.65–0.95)  |
| Central Bedfordshire | 1970        | 0.83<br>(0.69–0.98) |
| Central Bedfordshire | 1971        | 0.86<br>(0.72–1.0)  |
| Central Bedfordshire | 1972        | 0.86<br>(0.73–1.01) |
| Central Bedfordshire | 1973        | 0.87<br>(0.74–1.0)  |
| Central Bedfordshire | 1974        | 0.89<br>(0.76–1.02) |
| Central Bedfordshire | 1975        | 0.89<br>(0.77–1.03) |
| Central Bedfordshire | 1976        | 0.86<br>(0.75–0.99) |
| Central Bedfordshire | 1977        | 0.89<br>(0.78–1.0)  |
| Central Bedfordshire | 1978        | 0.94<br>(0.85–1.04) |
| Central Bedfordshire | 1979        | 0.96<br>(0.87–1.06) |
| Central Bedfordshire | 1980        | 0.95<br>(0.87–1.04) |
| Central Bedfordshire | 1981        | 0.91<br>(0.85–0.98) |
| Central Bedfordshire | 1982        | 0.96<br>(0.89–1.03) |
| Central Bedfordshire | 1983        | 0.96<br>(0.9–1.03)  |
| Central Bedfordshire | 1984        | 0.96<br>(0.9–1.02)  |
| Central Bedfordshire | 1985        | 0.99<br>(0.93–1.05) |

**Table 15 Ratio of adjusted to unadjusted 5q0 values for scaled locations by year**

| <b>Geography</b>     | <b>Year</b> | <b>Ratio</b>        |
|----------------------|-------------|---------------------|
| Central Bedfordshire | 1986        | 1.02<br>(0.95–1.08) |
| Central Bedfordshire | 1987        | 1.02<br>(0.96–1.09) |
| Central Bedfordshire | 1988        | 1.03<br>(0.97–1.1)  |
| Central Bedfordshire | 1989        | 1.0<br>(0.94–1.06)  |
| Central Bedfordshire | 1990        | 0.98<br>(0.93–1.04) |
| Central Bedfordshire | 1991        | 0.96<br>(0.91–1.02) |
| Central Bedfordshire | 1992        | 0.92<br>(0.86–0.98) |
| Central Bedfordshire | 1993        | 0.95<br>(0.88–1.02) |
| Central Bedfordshire | 1994        | 0.98<br>(0.91–1.05) |
| Central Bedfordshire | 1995        | 0.99<br>(0.92–1.07) |
| Central Bedfordshire | 1996        | 1.03<br>(0.96–1.1)  |
| Central Bedfordshire | 1997        | 1.0<br>(0.93–1.07)  |
| Central Bedfordshire | 1998        | 0.99<br>(0.92–1.06) |
| Central Bedfordshire | 1999        | 1.01<br>(0.94–1.08) |
| Central Bedfordshire | 2000        | 0.99<br>(0.9–1.08)  |
| Central Bedfordshire | 2001        | 0.98<br>(0.91–1.07) |
| Central Bedfordshire | 2002        | 0.98<br>(0.92–1.05) |
| Central Bedfordshire | 2003        | 1.03<br>(0.94–1.12) |
| Central Bedfordshire | 2004        | 1.0<br>(0.91–1.1)   |
| Central Bedfordshire | 2005        | 1.01<br>(0.92–1.1)  |
| Central Bedfordshire | 2006        | 1.04<br>(0.95–1.14) |
| Central Bedfordshire | 2007        | 1.05<br>(0.96–1.16) |
| Central Bedfordshire | 2008        | 1.04<br>(0.95–1.14) |
| Central Bedfordshire | 2009        | 1.02<br>(0.94–1.11) |
| Central Bedfordshire | 2010        | 0.99<br>(0.92–1.06) |
| Central Bedfordshire | 2011        | 1.02<br>(0.94–1.09) |
| Central Bedfordshire | 2012        | 1.01<br>(0.93–1.08) |
| Central Bedfordshire | 2013        | 0.96<br>(0.89–1.04) |
| Central Bedfordshire | 2014        | 0.97<br>(0.89–1.06) |
| Central Bedfordshire | 2015        | 0.97<br>(0.89–1.05) |
| Central Bedfordshire | 2016        | 0.97<br>(0.9–1.03)  |

**Table 15 Ratio of adjusted to unadjusted 5q0 values for scaled locations by year**

| <b>Geography</b>     | <b>Year</b> | <b>Ratio</b>        |
|----------------------|-------------|---------------------|
| Central Bedfordshire | 2017        | 0.99<br>(0.88–1.11) |
| Essex                | 1950        | 0.7<br>(0.57–0.83)  |
| Essex                | 1951        | 0.81<br>(0.66–0.97) |
| Essex                | 1952        | 0.76<br>(0.62–0.9)  |
| Essex                | 1953        | 0.76<br>(0.63–0.91) |
| Essex                | 1954        | 0.71<br>(0.59–0.85) |
| Essex                | 1955        | 0.71<br>(0.59–0.85) |
| Essex                | 1956        | 0.7<br>(0.59–0.83)  |
| Essex                | 1957        | 0.71<br>(0.61–0.83) |
| Essex                | 1958        | 0.7<br>(0.61–0.81)  |
| Essex                | 1959        | 0.71<br>(0.61–0.82) |
| Essex                | 1960        | 0.72<br>(0.61–0.85) |
| Essex                | 1961        | 0.73<br>(0.61–0.88) |
| Essex                | 1962        | 0.76<br>(0.63–0.9)  |
| Essex                | 1963        | 0.76<br>(0.63–0.91) |
| Essex                | 1964        | 0.75<br>(0.61–0.89) |
| Essex                | 1965        | 0.73<br>(0.6–0.87)  |
| Essex                | 1966        | 0.75<br>(0.61–0.9)  |
| Essex                | 1967        | 0.75<br>(0.6–0.9)   |
| Essex                | 1968        | 0.78<br>(0.63–0.94) |
| Essex                | 1969        | 0.8<br>(0.65–0.95)  |
| Essex                | 1970        | 0.83<br>(0.69–0.98) |
| Essex                | 1971        | 0.86<br>(0.72–1.0)  |
| Essex                | 1972        | 0.86<br>(0.73–1.01) |
| Essex                | 1973        | 0.87<br>(0.74–1.0)  |
| Essex                | 1974        | 0.89<br>(0.76–1.02) |
| Essex                | 1975        | 0.89<br>(0.77–1.03) |
| Essex                | 1976        | 0.86<br>(0.75–0.99) |
| Essex                | 1977        | 0.89<br>(0.78–1.0)  |
| Essex                | 1978        | 0.94<br>(0.85–1.04) |
| Essex                | 1979        | 0.96<br>(0.87–1.06) |



**Table 15 Ratio of adjusted to unadjusted 5q0 values for scaled locations by year**

| <b>Geography</b> | <b>Year</b> | <b>Ratio</b>        |
|------------------|-------------|---------------------|
| Essex            | 1980        | 0.95<br>(0.87–1.04) |
| Essex            | 1981        | 0.91<br>(0.85–0.98) |
| Essex            | 1982        | 0.96<br>(0.89–1.03) |
| Essex            | 1983        | 0.96<br>(0.9–1.03)  |
| Essex            | 1984        | 0.96<br>(0.9–1.02)  |
| Essex            | 1985        | 0.99<br>(0.93–1.05) |
| Essex            | 1986        | 1.02<br>(0.95–1.08) |
| Essex            | 1987        | 1.02<br>(0.96–1.09) |
| Essex            | 1988        | 1.03<br>(0.97–1.1)  |
| Essex            | 1989        | 1.0<br>(0.94–1.06)  |
| Essex            | 1990        | 0.98<br>(0.93–1.04) |
| Essex            | 1991        | 0.96<br>(0.91–1.02) |
| Essex            | 1992        | 0.92<br>(0.86–0.98) |
| Essex            | 1993        | 0.95<br>(0.88–1.02) |
| Essex            | 1994        | 0.98<br>(0.91–1.05) |
| Essex            | 1995        | 0.99<br>(0.92–1.07) |
| Essex            | 1996        | 1.03<br>(0.96–1.1)  |
| Essex            | 1997        | 1.0<br>(0.93–1.07)  |
| Essex            | 1998        | 0.99<br>(0.92–1.06) |
| Essex            | 1999        | 1.01<br>(0.94–1.08) |
| Essex            | 2000        | 0.99<br>(0.9–1.08)  |
| Essex            | 2001        | 0.98<br>(0.91–1.07) |
| Essex            | 2002        | 0.98<br>(0.92–1.05) |
| Essex            | 2003        | 1.03<br>(0.94–1.12) |
| Essex            | 2004        | 1.0<br>(0.91–1.1)   |
| Essex            | 2005        | 1.01<br>(0.92–1.1)  |
| Essex            | 2006        | 1.04<br>(0.95–1.14) |
| Essex            | 2007        | 1.05<br>(0.96–1.16) |
| Essex            | 2008        | 1.04<br>(0.95–1.14) |
| Essex            | 2009        | 1.02<br>(0.94–1.11) |
| Essex            | 2010        | 0.99<br>(0.92–1.06) |

**Table 15 Ratio of adjusted to unadjusted 5q0 values for scaled locations by year**

| <b>Geography</b> | <b>Year</b> | <b>Ratio</b>        |
|------------------|-------------|---------------------|
| Essex            | 2011        | 1.02<br>(0.94–1.09) |
| Essex            | 2012        | 1.01<br>(0.93–1.08) |
| Essex            | 2013        | 0.96<br>(0.89–1.04) |
| Essex            | 2014        | 0.97<br>(0.89–1.06) |
| Essex            | 2015        | 0.97<br>(0.89–1.05) |
| Essex            | 2016        | 0.97<br>(0.9–1.03)  |
| Essex            | 2017        | 0.99<br>(0.88–1.11) |
| Hertfordshire    | 1950        | 0.69<br>(0.57–0.83) |
| Hertfordshire    | 1951        | 0.81<br>(0.66–0.97) |
| Hertfordshire    | 1952        | 0.76<br>(0.62–0.9)  |
| Hertfordshire    | 1953        | 0.76<br>(0.63–0.91) |
| Hertfordshire    | 1954        | 0.71<br>(0.59–0.85) |
| Hertfordshire    | 1955        | 0.71<br>(0.59–0.85) |
| Hertfordshire    | 1956        | 0.7<br>(0.59–0.83)  |
| Hertfordshire    | 1957        | 0.71<br>(0.61–0.83) |
| Hertfordshire    | 1958        | 0.7<br>(0.61–0.81)  |
| Hertfordshire    | 1959        | 0.71<br>(0.61–0.82) |
| Hertfordshire    | 1960        | 0.72<br>(0.61–0.85) |
| Hertfordshire    | 1961        | 0.73<br>(0.61–0.88) |
| Hertfordshire    | 1962        | 0.76<br>(0.63–0.9)  |
| Hertfordshire    | 1963        | 0.76<br>(0.63–0.91) |
| Hertfordshire    | 1964        | 0.75<br>(0.61–0.89) |
| Hertfordshire    | 1965        | 0.73<br>(0.6–0.87)  |
| Hertfordshire    | 1966        | 0.75<br>(0.61–0.9)  |
| Hertfordshire    | 1967        | 0.75<br>(0.6–0.9)   |
| Hertfordshire    | 1968        | 0.78<br>(0.63–0.94) |
| Hertfordshire    | 1969        | 0.8<br>(0.65–0.95)  |
| Hertfordshire    | 1970        | 0.83<br>(0.68–0.98) |
| Hertfordshire    | 1971        | 0.86<br>(0.72–1.0)  |
| Hertfordshire    | 1972        | 0.86<br>(0.73–1.01) |
| Hertfordshire    | 1973        | 0.87<br>(0.74–1.0)  |

**Table 15 Ratio of adjusted to unadjusted 5q0 values for scaled locations by year**

| <b>Geography</b> | <b>Year</b> | <b>Ratio</b>        |
|------------------|-------------|---------------------|
| Hertfordshire    | 1974        | 0.89<br>(0.76–1.02) |
| Hertfordshire    | 1975        | 0.89<br>(0.77–1.03) |
| Hertfordshire    | 1976        | 0.86<br>(0.75–0.99) |
| Hertfordshire    | 1977        | 0.89<br>(0.78–1.0)  |
| Hertfordshire    | 1978        | 0.94<br>(0.85–1.04) |
| Hertfordshire    | 1979        | 0.96<br>(0.87–1.06) |
| Hertfordshire    | 1980        | 0.95<br>(0.87–1.04) |
| Hertfordshire    | 1981        | 0.91<br>(0.85–0.98) |
| Hertfordshire    | 1982        | 0.96<br>(0.89–1.03) |
| Hertfordshire    | 1983        | 0.96<br>(0.9–1.03)  |
| Hertfordshire    | 1984        | 0.96<br>(0.9–1.02)  |
| Hertfordshire    | 1985        | 0.99<br>(0.93–1.05) |
| Hertfordshire    | 1986        | 1.02<br>(0.95–1.08) |
| Hertfordshire    | 1987        | 1.02<br>(0.96–1.09) |
| Hertfordshire    | 1988        | 1.03<br>(0.97–1.1)  |
| Hertfordshire    | 1989        | 1.0<br>(0.94–1.06)  |
| Hertfordshire    | 1990        | 0.98<br>(0.93–1.04) |
| Hertfordshire    | 1991        | 0.96<br>(0.91–1.02) |
| Hertfordshire    | 1992        | 0.92<br>(0.86–0.98) |
| Hertfordshire    | 1993        | 0.95<br>(0.88–1.02) |
| Hertfordshire    | 1994        | 0.98<br>(0.91–1.05) |
| Hertfordshire    | 1995        | 0.99<br>(0.92–1.07) |
| Hertfordshire    | 1996        | 1.03<br>(0.96–1.1)  |
| Hertfordshire    | 1997        | 1.0<br>(0.93–1.07)  |
| Hertfordshire    | 1998        | 0.99<br>(0.92–1.06) |
| Hertfordshire    | 1999        | 1.01<br>(0.94–1.08) |
| Hertfordshire    | 2000        | 0.99<br>(0.9–1.08)  |
| Hertfordshire    | 2001        | 0.98<br>(0.91–1.07) |
| Hertfordshire    | 2002        | 0.98<br>(0.92–1.05) |
| Hertfordshire    | 2003        | 1.03<br>(0.94–1.12) |
| Hertfordshire    | 2004        | 1.0<br>(0.91–1.1)   |

**Table 15 Ratio of adjusted to unadjusted 5q0 values for scaled locations by year**

| <b>Geography</b> | <b>Year</b> | <b>Ratio</b>        |
|------------------|-------------|---------------------|
| Hertfordshire    | 2005        | 1.01<br>(0.92–1.1)  |
| Hertfordshire    | 2006        | 1.04<br>(0.95–1.14) |
| Hertfordshire    | 2007        | 1.05<br>(0.96–1.16) |
| Hertfordshire    | 2008        | 1.04<br>(0.95–1.14) |
| Hertfordshire    | 2009        | 1.02<br>(0.94–1.11) |
| Hertfordshire    | 2010        | 0.99<br>(0.92–1.06) |
| Hertfordshire    | 2011        | 1.02<br>(0.94–1.09) |
| Hertfordshire    | 2012        | 1.01<br>(0.93–1.08) |
| Hertfordshire    | 2013        | 0.96<br>(0.89–1.04) |
| Hertfordshire    | 2014        | 0.97<br>(0.89–1.06) |
| Hertfordshire    | 2015        | 0.97<br>(0.89–1.05) |
| Hertfordshire    | 2016        | 0.97<br>(0.9–1.03)  |
| Hertfordshire    | 2017        | 0.99<br>(0.88–1.11) |
| Luton            | 1950        | 0.7<br>(0.58–0.83)  |
| Luton            | 1951        | 0.81<br>(0.67–0.97) |
| Luton            | 1952        | 0.76<br>(0.62–0.9)  |
| Luton            | 1953        | 0.76<br>(0.63–0.91) |
| Luton            | 1954        | 0.71<br>(0.59–0.85) |
| Luton            | 1955        | 0.71<br>(0.59–0.85) |
| Luton            | 1956        | 0.7<br>(0.59–0.83)  |
| Luton            | 1957        | 0.71<br>(0.61–0.83) |
| Luton            | 1958        | 0.7<br>(0.61–0.81)  |
| Luton            | 1959        | 0.71<br>(0.61–0.82) |
| Luton            | 1960        | 0.72<br>(0.61–0.85) |
| Luton            | 1961        | 0.73<br>(0.61–0.88) |
| Luton            | 1962        | 0.76<br>(0.63–0.9)  |
| Luton            | 1963        | 0.76<br>(0.63–0.91) |
| Luton            | 1964        | 0.75<br>(0.61–0.89) |
| Luton            | 1965        | 0.73<br>(0.6–0.87)  |
| Luton            | 1966        | 0.76<br>(0.61–0.9)  |
| Luton            | 1967        | 0.75<br>(0.6–0.9)   |

**Table 15 Ratio of adjusted to unadjusted 5q0 values for scaled locations by year**

| <b>Geography</b> | <b>Year</b> | <b>Ratio</b>        |
|------------------|-------------|---------------------|
| Luton            | 1968        | 0.78<br>(0.63–0.94) |
| Luton            | 1969        | 0.8<br>(0.65–0.95)  |
| Luton            | 1970        | 0.83<br>(0.69–0.98) |
| Luton            | 1971        | 0.86<br>(0.72–1.0)  |
| Luton            | 1972        | 0.86<br>(0.73–1.01) |
| Luton            | 1973        | 0.87<br>(0.74–1.0)  |
| Luton            | 1974        | 0.89<br>(0.77–1.02) |
| Luton            | 1975        | 0.89<br>(0.77–1.03) |
| Luton            | 1976        | 0.86<br>(0.75–0.99) |
| Luton            | 1977        | 0.89<br>(0.79–1.0)  |
| Luton            | 1978        | 0.94<br>(0.85–1.04) |
| Luton            | 1979        | 0.96<br>(0.88–1.06) |
| Luton            | 1980        | 0.95<br>(0.87–1.04) |
| Luton            | 1981        | 0.91<br>(0.85–0.98) |
| Luton            | 1982        | 0.96<br>(0.89–1.03) |
| Luton            | 1983        | 0.96<br>(0.9–1.03)  |
| Luton            | 1984        | 0.96<br>(0.9–1.02)  |
| Luton            | 1985        | 0.99<br>(0.93–1.05) |
| Luton            | 1986        | 1.02<br>(0.95–1.08) |
| Luton            | 1987        | 1.02<br>(0.96–1.09) |
| Luton            | 1988        | 1.03<br>(0.97–1.1)  |
| Luton            | 1989        | 1.0<br>(0.94–1.06)  |
| Luton            | 1990        | 0.98<br>(0.93–1.04) |
| Luton            | 1991        | 0.96<br>(0.91–1.02) |
| Luton            | 1992        | 0.92<br>(0.86–0.98) |
| Luton            | 1993        | 0.95<br>(0.88–1.02) |
| Luton            | 1994        | 0.98<br>(0.91–1.05) |
| Luton            | 1995        | 0.99<br>(0.92–1.07) |
| Luton            | 1996        | 1.03<br>(0.96–1.1)  |
| Luton            | 1997        | 1.0<br>(0.93–1.07)  |
| Luton            | 1998        | 0.99<br>(0.92–1.06) |

**Table 15 Ratio of adjusted to unadjusted 5q0 values for scaled locations by year**

| <b>Geography</b> | <b>Year</b> | <b>Ratio</b>        |
|------------------|-------------|---------------------|
| Luton            | 1999        | 1.01<br>(0.94–1.08) |
| Luton            | 2000        | 0.99<br>(0.9–1.08)  |
| Luton            | 2001        | 0.98<br>(0.91–1.07) |
| Luton            | 2002        | 0.98<br>(0.92–1.05) |
| Luton            | 2003        | 1.03<br>(0.94–1.12) |
| Luton            | 2004        | 1.0<br>(0.91–1.1)   |
| Luton            | 2005        | 1.01<br>(0.92–1.1)  |
| Luton            | 2006        | 1.04<br>(0.95–1.14) |
| Luton            | 2007        | 1.05<br>(0.96–1.16) |
| Luton            | 2008        | 1.04<br>(0.95–1.14) |
| Luton            | 2009        | 1.02<br>(0.94–1.11) |
| Luton            | 2010        | 0.99<br>(0.92–1.05) |
| Luton            | 2011        | 1.02<br>(0.94–1.09) |
| Luton            | 2012        | 1.01<br>(0.93–1.08) |
| Luton            | 2013        | 0.96<br>(0.89–1.04) |
| Luton            | 2014        | 0.97<br>(0.89–1.06) |
| Luton            | 2015        | 0.97<br>(0.89–1.05) |
| Luton            | 2016        | 0.97<br>(0.9–1.03)  |
| Luton            | 2017        | 0.99<br>(0.88–1.11) |
| Norfolk          | 1950        | 0.7<br>(0.57–0.83)  |
| Norfolk          | 1951        | 0.81<br>(0.66–0.97) |
| Norfolk          | 1952        | 0.76<br>(0.62–0.9)  |
| Norfolk          | 1953        | 0.76<br>(0.63–0.91) |
| Norfolk          | 1954        | 0.71<br>(0.59–0.85) |
| Norfolk          | 1955        | 0.71<br>(0.59–0.85) |
| Norfolk          | 1956        | 0.7<br>(0.59–0.83)  |
| Norfolk          | 1957        | 0.71<br>(0.61–0.83) |
| Norfolk          | 1958        | 0.7<br>(0.61–0.81)  |
| Norfolk          | 1959        | 0.71<br>(0.61–0.82) |
| Norfolk          | 1960        | 0.72<br>(0.61–0.85) |
| Norfolk          | 1961        | 0.73<br>(0.61–0.88) |

**Table 15 Ratio of adjusted to unadjusted 5q0 values for scaled locations by year**

| <b>Geography</b> | <b>Year</b> | <b>Ratio</b>        |
|------------------|-------------|---------------------|
| Norfolk          | 1962        | 0.76<br>(0.63–0.9)  |
| Norfolk          | 1963        | 0.76<br>(0.63–0.91) |
| Norfolk          | 1964        | 0.75<br>(0.61–0.89) |
| Norfolk          | 1965        | 0.73<br>(0.6–0.87)  |
| Norfolk          | 1966        | 0.75<br>(0.61–0.9)  |
| Norfolk          | 1967        | 0.75<br>(0.6–0.9)   |
| Norfolk          | 1968        | 0.78<br>(0.63–0.94) |
| Norfolk          | 1969        | 0.8<br>(0.65–0.95)  |
| Norfolk          | 1970        | 0.83<br>(0.69–0.98) |
| Norfolk          | 1971        | 0.86<br>(0.72–1.0)  |
| Norfolk          | 1972        | 0.86<br>(0.73–1.01) |
| Norfolk          | 1973        | 0.87<br>(0.74–1.0)  |
| Norfolk          | 1974        | 0.89<br>(0.76–1.02) |
| Norfolk          | 1975        | 0.89<br>(0.77–1.03) |
| Norfolk          | 1976        | 0.86<br>(0.75–0.99) |
| Norfolk          | 1977        | 0.89<br>(0.79–1.0)  |
| Norfolk          | 1978        | 0.94<br>(0.85–1.04) |
| Norfolk          | 1979        | 0.96<br>(0.87–1.06) |
| Norfolk          | 1980        | 0.95<br>(0.87–1.04) |
| Norfolk          | 1981        | 0.91<br>(0.85–0.98) |
| Norfolk          | 1982        | 0.96<br>(0.89–1.03) |
| Norfolk          | 1983        | 0.96<br>(0.9–1.03)  |
| Norfolk          | 1984        | 0.96<br>(0.9–1.02)  |
| Norfolk          | 1985        | 0.99<br>(0.93–1.05) |
| Norfolk          | 1986        | 1.02<br>(0.95–1.08) |
| Norfolk          | 1987        | 1.02<br>(0.96–1.09) |
| Norfolk          | 1988        | 1.03<br>(0.97–1.1)  |
| Norfolk          | 1989        | 1.0<br>(0.94–1.06)  |
| Norfolk          | 1990        | 0.98<br>(0.93–1.04) |
| Norfolk          | 1991        | 0.96<br>(0.91–1.02) |
| Norfolk          | 1992        | 0.92<br>(0.86–0.98) |

**Table 15 Ratio of adjusted to unadjusted 5q0 values for scaled locations by year**

| <b>Geography</b> | <b>Year</b> | <b>Ratio</b>        |
|------------------|-------------|---------------------|
| Norfolk          | 1993        | 0.95<br>(0.88–1.02) |
| Norfolk          | 1994        | 0.98<br>(0.91–1.05) |
| Norfolk          | 1995        | 0.99<br>(0.92–1.07) |
| Norfolk          | 1996        | 1.03<br>(0.96–1.1)  |
| Norfolk          | 1997        | 1.0<br>(0.93–1.07)  |
| Norfolk          | 1998        | 0.99<br>(0.92–1.06) |
| Norfolk          | 1999        | 1.01<br>(0.94–1.08) |
| Norfolk          | 2000        | 0.99<br>(0.9–1.08)  |
| Norfolk          | 2001        | 0.98<br>(0.91–1.07) |
| Norfolk          | 2002        | 0.98<br>(0.92–1.05) |
| Norfolk          | 2003        | 1.03<br>(0.94–1.12) |
| Norfolk          | 2004        | 1.0<br>(0.91–1.1)   |
| Norfolk          | 2005        | 1.01<br>(0.92–1.1)  |
| Norfolk          | 2006        | 1.04<br>(0.95–1.14) |
| Norfolk          | 2007        | 1.05<br>(0.96–1.16) |
| Norfolk          | 2008        | 1.04<br>(0.95–1.14) |
| Norfolk          | 2009        | 1.02<br>(0.94–1.11) |
| Norfolk          | 2010        | 0.99<br>(0.92–1.05) |
| Norfolk          | 2011        | 1.02<br>(0.94–1.09) |
| Norfolk          | 2012        | 1.01<br>(0.93–1.08) |
| Norfolk          | 2013        | 0.96<br>(0.89–1.04) |
| Norfolk          | 2014        | 0.97<br>(0.89–1.06) |
| Norfolk          | 2015        | 0.97<br>(0.89–1.05) |
| Norfolk          | 2016        | 0.97<br>(0.9–1.03)  |
| Norfolk          | 2017        | 0.99<br>(0.88–1.11) |
| Peterborough     | 1950        | 0.7<br>(0.57–0.83)  |
| Peterborough     | 1951        | 0.81<br>(0.66–0.97) |
| Peterborough     | 1952        | 0.76<br>(0.62–0.9)  |
| Peterborough     | 1953        | 0.76<br>(0.63–0.91) |
| Peterborough     | 1954        | 0.71<br>(0.59–0.85) |
| Peterborough     | 1955        | 0.71<br>(0.59–0.85) |



**Table 15 Ratio of adjusted to unadjusted 5q0 values for scaled locations by year**

| <b>Geography</b> | <b>Year</b> | <b>Ratio</b>        |
|------------------|-------------|---------------------|
| Peterborough     | 1956        | 0.7<br>(0.59–0.83)  |
| Peterborough     | 1957        | 0.71<br>(0.61–0.83) |
| Peterborough     | 1958        | 0.7<br>(0.61–0.81)  |
| Peterborough     | 1959        | 0.71<br>(0.61–0.82) |
| Peterborough     | 1960        | 0.72<br>(0.61–0.85) |
| Peterborough     | 1961        | 0.73<br>(0.61–0.88) |
| Peterborough     | 1962        | 0.76<br>(0.63–0.9)  |
| Peterborough     | 1963        | 0.76<br>(0.63–0.91) |
| Peterborough     | 1964        | 0.75<br>(0.61–0.89) |
| Peterborough     | 1965        | 0.73<br>(0.6–0.87)  |
| Peterborough     | 1966        | 0.75<br>(0.61–0.9)  |
| Peterborough     | 1967        | 0.75<br>(0.6–0.9)   |
| Peterborough     | 1968        | 0.78<br>(0.63–0.94) |
| Peterborough     | 1969        | 0.8<br>(0.65–0.95)  |
| Peterborough     | 1970        | 0.83<br>(0.69–0.98) |
| Peterborough     | 1971        | 0.86<br>(0.72–1.0)  |
| Peterborough     | 1972        | 0.86<br>(0.73–1.01) |
| Peterborough     | 1973        | 0.87<br>(0.74–1.0)  |
| Peterborough     | 1974        | 0.89<br>(0.76–1.02) |
| Peterborough     | 1975        | 0.89<br>(0.77–1.03) |
| Peterborough     | 1976        | 0.86<br>(0.75–0.99) |
| Peterborough     | 1977        | 0.89<br>(0.79–1.0)  |
| Peterborough     | 1978        | 0.94<br>(0.85–1.04) |
| Peterborough     | 1979        | 0.96<br>(0.87–1.06) |
| Peterborough     | 1980        | 0.95<br>(0.87–1.04) |
| Peterborough     | 1981        | 0.91<br>(0.85–0.98) |
| Peterborough     | 1982        | 0.96<br>(0.89–1.03) |
| Peterborough     | 1983        | 0.96<br>(0.9–1.03)  |
| Peterborough     | 1984        | 0.96<br>(0.9–1.02)  |
| Peterborough     | 1985        | 0.99<br>(0.93–1.05) |
| Peterborough     | 1986        | 1.02<br>(0.95–1.08) |

**Table 15 Ratio of adjusted to unadjusted 5q0 values for scaled locations by year**

| <b>Geography</b> | <b>Year</b> | <b>Ratio</b>        |
|------------------|-------------|---------------------|
| Peterborough     | 1987        | 1.02<br>(0.96–1.09) |
| Peterborough     | 1988        | 1.03<br>(0.97–1.1)  |
| Peterborough     | 1989        | 1.0<br>(0.94–1.06)  |
| Peterborough     | 1990        | 0.98<br>(0.93–1.04) |
| Peterborough     | 1991        | 0.96<br>(0.91–1.02) |
| Peterborough     | 1992        | 0.92<br>(0.86–0.98) |
| Peterborough     | 1993        | 0.95<br>(0.88–1.02) |
| Peterborough     | 1994        | 0.98<br>(0.91–1.05) |
| Peterborough     | 1995        | 0.99<br>(0.92–1.07) |
| Peterborough     | 1996        | 1.03<br>(0.96–1.1)  |
| Peterborough     | 1997        | 1.0<br>(0.93–1.07)  |
| Peterborough     | 1998        | 0.99<br>(0.92–1.06) |
| Peterborough     | 1999        | 1.01<br>(0.94–1.08) |
| Peterborough     | 2000        | 0.99<br>(0.9–1.08)  |
| Peterborough     | 2001        | 0.98<br>(0.91–1.07) |
| Peterborough     | 2002        | 0.98<br>(0.92–1.05) |
| Peterborough     | 2003        | 1.03<br>(0.94–1.12) |
| Peterborough     | 2004        | 1.0<br>(0.91–1.1)   |
| Peterborough     | 2005        | 1.01<br>(0.92–1.1)  |
| Peterborough     | 2006        | 1.04<br>(0.95–1.14) |
| Peterborough     | 2007        | 1.05<br>(0.96–1.16) |
| Peterborough     | 2008        | 1.04<br>(0.95–1.14) |
| Peterborough     | 2009        | 1.02<br>(0.94–1.11) |
| Peterborough     | 2010        | 0.99<br>(0.92–1.05) |
| Peterborough     | 2011        | 1.02<br>(0.94–1.09) |
| Peterborough     | 2012        | 1.01<br>(0.93–1.08) |
| Peterborough     | 2013        | 0.96<br>(0.89–1.04) |
| Peterborough     | 2014        | 0.97<br>(0.89–1.06) |
| Peterborough     | 2015        | 0.97<br>(0.89–1.05) |
| Peterborough     | 2016        | 0.97<br>(0.9–1.03)  |
| Peterborough     | 2017        | 0.99<br>(0.88–1.11) |

**Table 15 Ratio of adjusted to unadjusted 5q0 values for scaled locations by year**

| <b>Geography</b> | <b>Year</b> | <b>Ratio</b>        |
|------------------|-------------|---------------------|
| Southend-on-Sea  | 1950        | 0.7<br>(0.57–0.83)  |
| Southend-on-Sea  | 1951        | 0.81<br>(0.66–0.97) |
| Southend-on-Sea  | 1952        | 0.76<br>(0.62–0.9)  |
| Southend-on-Sea  | 1953        | 0.76<br>(0.63–0.91) |
| Southend-on-Sea  | 1954        | 0.71<br>(0.59–0.85) |
| Southend-on-Sea  | 1955        | 0.71<br>(0.59–0.85) |
| Southend-on-Sea  | 1956        | 0.7<br>(0.59–0.83)  |
| Southend-on-Sea  | 1957        | 0.71<br>(0.61–0.83) |
| Southend-on-Sea  | 1958        | 0.7<br>(0.61–0.81)  |
| Southend-on-Sea  | 1959        | 0.71<br>(0.61–0.82) |
| Southend-on-Sea  | 1960        | 0.72<br>(0.61–0.85) |
| Southend-on-Sea  | 1961        | 0.73<br>(0.61–0.88) |
| Southend-on-Sea  | 1962        | 0.76<br>(0.63–0.9)  |
| Southend-on-Sea  | 1963        | 0.76<br>(0.63–0.91) |
| Southend-on-Sea  | 1964        | 0.75<br>(0.61–0.89) |
| Southend-on-Sea  | 1965        | 0.73<br>(0.6–0.87)  |
| Southend-on-Sea  | 1966        | 0.75<br>(0.61–0.9)  |
| Southend-on-Sea  | 1967        | 0.75<br>(0.6–0.9)   |
| Southend-on-Sea  | 1968        | 0.78<br>(0.63–0.94) |
| Southend-on-Sea  | 1969        | 0.8<br>(0.65–0.95)  |
| Southend-on-Sea  | 1970        | 0.83<br>(0.69–0.98) |
| Southend-on-Sea  | 1971        | 0.86<br>(0.72–1.0)  |
| Southend-on-Sea  | 1972        | 0.86<br>(0.73–1.01) |
| Southend-on-Sea  | 1973        | 0.87<br>(0.74–1.0)  |
| Southend-on-Sea  | 1974        | 0.89<br>(0.76–1.02) |
| Southend-on-Sea  | 1975        | 0.89<br>(0.77–1.03) |
| Southend-on-Sea  | 1976        | 0.86<br>(0.75–0.99) |
| Southend-on-Sea  | 1977        | 0.89<br>(0.79–1.0)  |
| Southend-on-Sea  | 1978        | 0.94<br>(0.85–1.04) |
| Southend-on-Sea  | 1979        | 0.96<br>(0.87–1.06) |
| Southend-on-Sea  | 1980        | 0.95<br>(0.87–1.04) |

**Table 15 Ratio of adjusted to unadjusted 5q0 values for scaled locations by year**

| <b>Geography</b> | <b>Year</b> | <b>Ratio</b>        |
|------------------|-------------|---------------------|
| Southend-on-Sea  | 1981        | 0.91<br>(0.85–0.98) |
| Southend-on-Sea  | 1982        | 0.96<br>(0.89–1.03) |
| Southend-on-Sea  | 1983        | 0.96<br>(0.9–1.03)  |
| Southend-on-Sea  | 1984        | 0.96<br>(0.9–1.02)  |
| Southend-on-Sea  | 1985        | 0.99<br>(0.93–1.05) |
| Southend-on-Sea  | 1986        | 1.02<br>(0.95–1.08) |
| Southend-on-Sea  | 1987        | 1.02<br>(0.96–1.09) |
| Southend-on-Sea  | 1988        | 1.03<br>(0.97–1.1)  |
| Southend-on-Sea  | 1989        | 1.0<br>(0.94–1.06)  |
| Southend-on-Sea  | 1990        | 0.98<br>(0.93–1.04) |
| Southend-on-Sea  | 1991        | 0.96<br>(0.91–1.02) |
| Southend-on-Sea  | 1992        | 0.92<br>(0.86–0.98) |
| Southend-on-Sea  | 1993        | 0.95<br>(0.88–1.02) |
| Southend-on-Sea  | 1994        | 0.98<br>(0.91–1.05) |
| Southend-on-Sea  | 1995        | 0.99<br>(0.92–1.07) |
| Southend-on-Sea  | 1996        | 1.03<br>(0.96–1.1)  |
| Southend-on-Sea  | 1997        | 1.0<br>(0.93–1.07)  |
| Southend-on-Sea  | 1998        | 0.99<br>(0.92–1.06) |
| Southend-on-Sea  | 1999        | 1.01<br>(0.94–1.08) |
| Southend-on-Sea  | 2000        | 0.99<br>(0.9–1.08)  |
| Southend-on-Sea  | 2001        | 0.98<br>(0.91–1.07) |
| Southend-on-Sea  | 2002        | 0.98<br>(0.92–1.05) |
| Southend-on-Sea  | 2003        | 1.03<br>(0.94–1.12) |
| Southend-on-Sea  | 2004        | 1.0<br>(0.91–1.1)   |
| Southend-on-Sea  | 2005        | 1.01<br>(0.92–1.1)  |
| Southend-on-Sea  | 2006        | 1.04<br>(0.95–1.14) |
| Southend-on-Sea  | 2007        | 1.05<br>(0.96–1.16) |
| Southend-on-Sea  | 2008        | 1.04<br>(0.95–1.14) |
| Southend-on-Sea  | 2009        | 1.02<br>(0.94–1.11) |
| Southend-on-Sea  | 2010        | 0.99<br>(0.92–1.05) |
| Southend-on-Sea  | 2011        | 1.02<br>(0.94–1.09) |

**Table 15 Ratio of adjusted to unadjusted 5q0 values for scaled locations by year**

| <b>Geography</b> | <b>Year</b> | <b>Ratio</b>        |
|------------------|-------------|---------------------|
| Southend-on-Sea  | 2012        | 1.01<br>(0.93–1.08) |
| Southend-on-Sea  | 2013        | 0.96<br>(0.89–1.04) |
| Southend-on-Sea  | 2014        | 0.97<br>(0.89–1.06) |
| Southend-on-Sea  | 2015        | 0.97<br>(0.89–1.05) |
| Southend-on-Sea  | 2016        | 0.97<br>(0.9–1.03)  |
| Southend-on-Sea  | 2017        | 0.99<br>(0.88–1.11) |
| Suffolk          | 1950        | 0.7<br>(0.57–0.83)  |
| Suffolk          | 1951        | 0.81<br>(0.66–0.97) |
| Suffolk          | 1952        | 0.76<br>(0.62–0.9)  |
| Suffolk          | 1953        | 0.76<br>(0.63–0.91) |
| Suffolk          | 1954        | 0.71<br>(0.59–0.85) |
| Suffolk          | 1955        | 0.71<br>(0.59–0.85) |
| Suffolk          | 1956        | 0.7<br>(0.59–0.83)  |
| Suffolk          | 1957        | 0.71<br>(0.61–0.83) |
| Suffolk          | 1958        | 0.7<br>(0.61–0.81)  |
| Suffolk          | 1959        | 0.71<br>(0.61–0.82) |
| Suffolk          | 1960        | 0.72<br>(0.61–0.85) |
| Suffolk          | 1961        | 0.73<br>(0.61–0.88) |
| Suffolk          | 1962        | 0.76<br>(0.63–0.9)  |
| Suffolk          | 1963        | 0.76<br>(0.63–0.91) |
| Suffolk          | 1964        | 0.75<br>(0.61–0.89) |
| Suffolk          | 1965        | 0.73<br>(0.6–0.87)  |
| Suffolk          | 1966        | 0.75<br>(0.61–0.9)  |
| Suffolk          | 1967        | 0.75<br>(0.6–0.9)   |
| Suffolk          | 1968        | 0.78<br>(0.63–0.94) |
| Suffolk          | 1969        | 0.8<br>(0.65–0.95)  |
| Suffolk          | 1970        | 0.83<br>(0.68–0.98) |
| Suffolk          | 1971        | 0.86<br>(0.72–1.0)  |
| Suffolk          | 1972        | 0.86<br>(0.73–1.01) |
| Suffolk          | 1973        | 0.87<br>(0.74–1.0)  |
| Suffolk          | 1974        | 0.89<br>(0.76–1.02) |

**Table 15 Ratio of adjusted to unadjusted 5q0 values for scaled locations by year**

| <b>Geography</b> | <b>Year</b> | <b>Ratio</b>        |
|------------------|-------------|---------------------|
| Suffolk          | 1975        | 0.89<br>(0.77–1.03) |
| Suffolk          | 1976        | 0.86<br>(0.75–0.99) |
| Suffolk          | 1977        | 0.89<br>(0.78–1.0)  |
| Suffolk          | 1978        | 0.94<br>(0.85–1.04) |
| Suffolk          | 1979        | 0.96<br>(0.87–1.06) |
| Suffolk          | 1980        | 0.95<br>(0.87–1.04) |
| Suffolk          | 1981        | 0.91<br>(0.85–0.98) |
| Suffolk          | 1982        | 0.96<br>(0.89–1.03) |
| Suffolk          | 1983        | 0.96<br>(0.9–1.03)  |
| Suffolk          | 1984        | 0.96<br>(0.9–1.02)  |
| Suffolk          | 1985        | 0.99<br>(0.93–1.05) |
| Suffolk          | 1986        | 1.02<br>(0.95–1.08) |
| Suffolk          | 1987        | 1.02<br>(0.96–1.09) |
| Suffolk          | 1988        | 1.03<br>(0.97–1.1)  |
| Suffolk          | 1989        | 1.0<br>(0.94–1.06)  |
| Suffolk          | 1990        | 0.98<br>(0.93–1.04) |
| Suffolk          | 1991        | 0.96<br>(0.91–1.02) |
| Suffolk          | 1992        | 0.92<br>(0.86–0.98) |
| Suffolk          | 1993        | 0.95<br>(0.88–1.02) |
| Suffolk          | 1994        | 0.98<br>(0.91–1.05) |
| Suffolk          | 1995        | 0.99<br>(0.92–1.07) |
| Suffolk          | 1996        | 1.03<br>(0.96–1.1)  |
| Suffolk          | 1997        | 1.0<br>(0.93–1.07)  |
| Suffolk          | 1998        | 0.99<br>(0.92–1.06) |
| Suffolk          | 1999        | 1.01<br>(0.94–1.08) |
| Suffolk          | 2000        | 0.99<br>(0.9–1.08)  |
| Suffolk          | 2001        | 0.98<br>(0.91–1.07) |
| Suffolk          | 2002        | 0.98<br>(0.92–1.05) |
| Suffolk          | 2003        | 1.03<br>(0.94–1.12) |
| Suffolk          | 2004        | 1.0<br>(0.91–1.1)   |
| Suffolk          | 2005        | 1.01<br>(0.92–1.1)  |

**Table 15 Ratio of adjusted to unadjusted 5q0 values for scaled locations by year**

| <b>Geography</b> | <b>Year</b> | <b>Ratio</b>        |
|------------------|-------------|---------------------|
| Suffolk          | 2006        | 1.04<br>(0.95–1.14) |
| Suffolk          | 2007        | 1.05<br>(0.96–1.16) |
| Suffolk          | 2008        | 1.04<br>(0.95–1.14) |
| Suffolk          | 2009        | 1.02<br>(0.94–1.11) |
| Suffolk          | 2010        | 0.99<br>(0.92–1.05) |
| Suffolk          | 2011        | 1.02<br>(0.94–1.09) |
| Suffolk          | 2012        | 1.01<br>(0.93–1.08) |
| Suffolk          | 2013        | 0.96<br>(0.89–1.04) |
| Suffolk          | 2014        | 0.97<br>(0.89–1.06) |
| Suffolk          | 2015        | 0.97<br>(0.89–1.05) |
| Suffolk          | 2016        | 0.97<br>(0.9–1.03)  |
| Suffolk          | 2017        | 0.99<br>(0.88–1.11) |
| Thurrock         | 1950        | 0.7<br>(0.57–0.83)  |
| Thurrock         | 1951        | 0.81<br>(0.66–0.97) |
| Thurrock         | 1952        | 0.76<br>(0.62–0.9)  |
| Thurrock         | 1953        | 0.76<br>(0.63–0.91) |
| Thurrock         | 1954        | 0.71<br>(0.59–0.85) |
| Thurrock         | 1955        | 0.71<br>(0.59–0.85) |
| Thurrock         | 1956        | 0.7<br>(0.59–0.83)  |
| Thurrock         | 1957        | 0.71<br>(0.61–0.83) |
| Thurrock         | 1958        | 0.7<br>(0.61–0.81)  |
| Thurrock         | 1959        | 0.71<br>(0.61–0.82) |
| Thurrock         | 1960        | 0.72<br>(0.61–0.85) |
| Thurrock         | 1961        | 0.73<br>(0.61–0.88) |
| Thurrock         | 1962        | 0.76<br>(0.63–0.9)  |
| Thurrock         | 1963        | 0.76<br>(0.63–0.91) |
| Thurrock         | 1964        | 0.75<br>(0.61–0.89) |
| Thurrock         | 1965        | 0.73<br>(0.6–0.87)  |
| Thurrock         | 1966        | 0.75<br>(0.61–0.9)  |
| Thurrock         | 1967        | 0.75<br>(0.6–0.9)   |
| Thurrock         | 1968        | 0.78<br>(0.63–0.94) |

**Table 15 Ratio of adjusted to unadjusted 5q0 values for scaled locations by year**

| <b>Geography</b> | <b>Year</b> | <b>Ratio</b>        |
|------------------|-------------|---------------------|
| Thurrock         | 1969        | 0.8<br>(0.65–0.95)  |
| Thurrock         | 1970        | 0.83<br>(0.69–0.98) |
| Thurrock         | 1971        | 0.86<br>(0.72–1.0)  |
| Thurrock         | 1972        | 0.86<br>(0.73–1.01) |
| Thurrock         | 1973        | 0.87<br>(0.74–1.0)  |
| Thurrock         | 1974        | 0.89<br>(0.76–1.02) |
| Thurrock         | 1975        | 0.89<br>(0.77–1.03) |
| Thurrock         | 1976        | 0.86<br>(0.75–0.99) |
| Thurrock         | 1977        | 0.89<br>(0.79–1.0)  |
| Thurrock         | 1978        | 0.94<br>(0.85–1.04) |
| Thurrock         | 1979        | 0.96<br>(0.87–1.06) |
| Thurrock         | 1980        | 0.95<br>(0.87–1.04) |
| Thurrock         | 1981        | 0.91<br>(0.85–0.98) |
| Thurrock         | 1982        | 0.96<br>(0.89–1.03) |
| Thurrock         | 1983        | 0.96<br>(0.9–1.03)  |
| Thurrock         | 1984        | 0.96<br>(0.9–1.02)  |
| Thurrock         | 1985        | 0.99<br>(0.93–1.05) |
| Thurrock         | 1986        | 1.02<br>(0.95–1.08) |
| Thurrock         | 1987        | 1.02<br>(0.96–1.09) |
| Thurrock         | 1988        | 1.03<br>(0.97–1.1)  |
| Thurrock         | 1989        | 1.0<br>(0.94–1.06)  |
| Thurrock         | 1990        | 0.98<br>(0.93–1.04) |
| Thurrock         | 1991        | 0.96<br>(0.91–1.02) |
| Thurrock         | 1992        | 0.92<br>(0.86–0.98) |
| Thurrock         | 1993        | 0.95<br>(0.88–1.02) |
| Thurrock         | 1994        | 0.98<br>(0.91–1.05) |
| Thurrock         | 1995        | 0.99<br>(0.92–1.07) |
| Thurrock         | 1996        | 1.03<br>(0.96–1.1)  |
| Thurrock         | 1997        | 1.0<br>(0.93–1.07)  |
| Thurrock         | 1998        | 0.99<br>(0.92–1.06) |
| Thurrock         | 1999        | 1.01<br>(0.94–1.08) |



**Table 15 Ratio of adjusted to unadjusted 5q0 values for scaled locations by year**

| <b>Geography</b> | <b>Year</b> | <b>Ratio</b>        |
|------------------|-------------|---------------------|
| Thurrock         | 2000        | 0.99<br>(0.9–1.08)  |
| Thurrock         | 2001        | 0.98<br>(0.91–1.07) |
| Thurrock         | 2002        | 0.98<br>(0.92–1.05) |
| Thurrock         | 2003        | 1.03<br>(0.94–1.12) |
| Thurrock         | 2004        | 1.0<br>(0.91–1.1)   |
| Thurrock         | 2005        | 1.01<br>(0.92–1.1)  |
| Thurrock         | 2006        | 1.04<br>(0.95–1.14) |
| Thurrock         | 2007        | 1.05<br>(0.96–1.16) |
| Thurrock         | 2008        | 1.04<br>(0.95–1.14) |
| Thurrock         | 2009        | 1.02<br>(0.94–1.11) |
| Thurrock         | 2010        | 0.99<br>(0.92–1.05) |
| Thurrock         | 2011        | 1.02<br>(0.94–1.09) |
| Thurrock         | 2012        | 1.01<br>(0.93–1.08) |
| Thurrock         | 2013        | 0.96<br>(0.89–1.04) |
| Thurrock         | 2014        | 0.97<br>(0.89–1.06) |
| Thurrock         | 2015        | 0.97<br>(0.89–1.05) |
| Thurrock         | 2016        | 0.97<br>(0.9–1.03)  |
| Thurrock         | 2017        | 0.99<br>(0.88–1.11) |
| Greater London   | 1950        | 0.9<br>(0.74–1.08)  |
| Greater London   | 1951        | 1.04<br>(0.85–1.25) |
| Greater London   | 1952        | 0.97<br>(0.8–1.17)  |
| Greater London   | 1953        | 0.98<br>(0.8–1.17)  |
| Greater London   | 1954        | 0.91<br>(0.75–1.1)  |
| Greater London   | 1955        | 0.91<br>(0.74–1.11) |
| Greater London   | 1956        | 0.89<br>(0.73–1.09) |
| Greater London   | 1957        | 0.9<br>(0.73–1.1)   |
| Greater London   | 1958        | 0.88<br>(0.71–1.07) |
| Greater London   | 1959        | 0.87<br>(0.71–1.06) |
| Greater London   | 1960        | 0.88<br>(0.71–1.06) |
| Greater London   | 1961        | 0.89<br>(0.72–1.07) |
| Greater London   | 1962        | 0.91<br>(0.74–1.09) |

**Table 15 Ratio of adjusted to unadjusted 5q0 values for scaled locations by year**

| <b>Geography</b> | <b>Year</b> | <b>Ratio</b>        |
|------------------|-------------|---------------------|
| Greater London   | 1963        | 0.91<br>(0.75–1.09) |
| Greater London   | 1964        | 0.88<br>(0.72–1.05) |
| Greater London   | 1965        | 0.85<br>(0.69–1.02) |
| Greater London   | 1966        | 0.87<br>(0.71–1.04) |
| Greater London   | 1967        | 0.85<br>(0.69–1.02) |
| Greater London   | 1968        | 0.88<br>(0.72–1.05) |
| Greater London   | 1969        | 0.89<br>(0.73–1.06) |
| Greater London   | 1970        | 0.91<br>(0.76–1.08) |
| Greater London   | 1971        | 0.93<br>(0.78–1.1)  |
| Greater London   | 1972        | 0.93<br>(0.78–1.11) |
| Greater London   | 1973        | 0.93<br>(0.78–1.12) |
| Greater London   | 1974        | 0.94<br>(0.79–1.11) |
| Greater London   | 1975        | 0.93<br>(0.79–1.1)  |
| Greater London   | 1976        | 0.9<br>(0.77–1.04)  |
| Greater London   | 1977        | 0.92<br>(0.8–1.04)  |
| Greater London   | 1978        | 0.96<br>(0.85–1.08) |
| Greater London   | 1979        | 0.98<br>(0.9–1.08)  |
| Greater London   | 1980        | 0.97<br>(0.9–1.04)  |
| Greater London   | 1981        | 0.93<br>(0.89–0.97) |
| Greater London   | 1982        | 0.98<br>(0.95–1.01) |
| Greater London   | 1983        | 1.0<br>(0.97–1.03)  |
| Greater London   | 1984        | 0.98<br>(0.95–1.01) |
| Greater London   | 1985        | 0.99<br>(0.95–1.02) |
| Greater London   | 1986        | 0.99<br>(0.97–1.02) |
| Greater London   | 1987        | 0.99<br>(0.96–1.01) |
| Greater London   | 1988        | 1.0<br>(0.97–1.03)  |
| Greater London   | 1989        | 0.99<br>(0.97–1.01) |
| Greater London   | 1990        | 1.0<br>(0.98–1.02)  |
| Greater London   | 1991        | 1.0<br>(0.98–1.02)  |
| Greater London   | 1992        | 0.97<br>(0.95–1.0)  |
| Greater London   | 1993        | 1.0<br>(0.97–1.02)  |

**Table 15 Ratio of adjusted to unadjusted 5q0 values for scaled locations by year**

| <b>Geography</b>     | <b>Year</b> | <b>Ratio</b>        |
|----------------------|-------------|---------------------|
| Greater London       | 1994        | 1.01<br>(0.98–1.04) |
| Greater London       | 1995        | 1.02<br>(0.99–1.05) |
| Greater London       | 1996        | 1.04<br>(1.01–1.06) |
| Greater London       | 1997        | 1.01<br>(0.97–1.05) |
| Greater London       | 1998        | 1.0<br>(0.96–1.03)  |
| Greater London       | 1999        | 1.02<br>(0.99–1.06) |
| Greater London       | 2000        | 1.01<br>(0.95–1.09) |
| Greater London       | 2001        | 1.0<br>(0.96–1.04)  |
| Greater London       | 2002        | 0.98<br>(0.95–1.02) |
| Greater London       | 2003        | 1.02<br>(0.98–1.06) |
| Greater London       | 2004        | 0.99<br>(0.96–1.02) |
| Greater London       | 2005        | 0.99<br>(0.95–1.03) |
| Greater London       | 2006        | 1.01<br>(0.97–1.05) |
| Greater London       | 2007        | 1.01<br>(0.98–1.05) |
| Greater London       | 2008        | 1.01<br>(0.98–1.04) |
| Greater London       | 2009        | 1.0<br>(0.96–1.04)  |
| Greater London       | 2010        | 0.98<br>(0.95–1.02) |
| Greater London       | 2011        | 1.0<br>(0.96–1.04)  |
| Greater London       | 2012        | 1.0<br>(0.96–1.04)  |
| Greater London       | 2013        | 0.99<br>(0.95–1.02) |
| Greater London       | 2014        | 0.99<br>(0.95–1.03) |
| Greater London       | 2015        | 1.0<br>(0.96–1.04)  |
| Greater London       | 2016        | 1.0<br>(0.94–1.05)  |
| Greater London       | 2017        | 1.02<br>(0.92–1.14) |
| Barking and Dagenham | 1950        | 0.57<br>(0.47–0.68) |
| Barking and Dagenham | 1951        | 0.66<br>(0.55–0.79) |
| Barking and Dagenham | 1952        | 0.62<br>(0.52–0.74) |
| Barking and Dagenham | 1953        | 0.63<br>(0.52–0.75) |
| Barking and Dagenham | 1954        | 0.6<br>(0.5–0.71)   |
| Barking and Dagenham | 1955        | 0.6<br>(0.51–0.71)  |
| Barking and Dagenham | 1956        | 0.6<br>(0.5–0.7)    |

**Table 15 Ratio of adjusted to unadjusted 5q0 values for scaled locations by year**

| <b>Geography</b>     | <b>Year</b> | <b>Ratio</b>        |
|----------------------|-------------|---------------------|
| Barking and Dagenham | 1957        | 0.61<br>(0.51–0.72) |
| Barking and Dagenham | 1958        | 0.61<br>(0.51–0.72) |
| Barking and Dagenham | 1959        | 0.61<br>(0.51–0.73) |
| Barking and Dagenham | 1960        | 0.63<br>(0.52–0.75) |
| Barking and Dagenham | 1961        | 0.64<br>(0.53–0.77) |
| Barking and Dagenham | 1962        | 0.67<br>(0.55–0.8)  |
| Barking and Dagenham | 1963        | 0.68<br>(0.57–0.81) |
| Barking and Dagenham | 1964        | 0.67<br>(0.55–0.8)  |
| Barking and Dagenham | 1965        | 0.66<br>(0.54–0.79) |
| Barking and Dagenham | 1966        | 0.69<br>(0.56–0.82) |
| Barking and Dagenham | 1967        | 0.68<br>(0.56–0.82) |
| Barking and Dagenham | 1968        | 0.72<br>(0.59–0.86) |
| Barking and Dagenham | 1969        | 0.74<br>(0.6–0.89)  |
| Barking and Dagenham | 1970        | 0.78<br>(0.63–0.94) |
| Barking and Dagenham | 1971        | 0.81<br>(0.67–0.97) |
| Barking and Dagenham | 1972        | 0.83<br>(0.68–0.98) |
| Barking and Dagenham | 1973        | 0.84<br>(0.71–0.98) |
| Barking and Dagenham | 1974        | 0.86<br>(0.74–1.01) |
| Barking and Dagenham | 1975        | 0.88<br>(0.75–1.02) |
| Barking and Dagenham | 1976        | 0.86<br>(0.74–1.0)  |
| Barking and Dagenham | 1977        | 0.89<br>(0.77–1.02) |
| Barking and Dagenham | 1978        | 0.95<br>(0.83–1.08) |
| Barking and Dagenham | 1979        | 0.98<br>(0.87–1.11) |
| Barking and Dagenham | 1980        | 0.97<br>(0.88–1.07) |
| Barking and Dagenham | 1981        | 0.94<br>(0.85–1.03) |
| Barking and Dagenham | 1982        | 0.95<br>(0.87–1.04) |
| Barking and Dagenham | 1983        | 0.93<br>(0.85–1.02) |
| Barking and Dagenham | 1984        | 0.93<br>(0.86–1.01) |
| Barking and Dagenham | 1985        | 0.97<br>(0.89–1.05) |
| Barking and Dagenham | 1986        | 0.99<br>(0.92–1.08) |
| Barking and Dagenham | 1987        | 1.04<br>(0.96–1.12) |

**Table 15 Ratio of adjusted to unadjusted 5q0 values for scaled locations by year**

| <b>Geography</b>     | <b>Year</b> | <b>Ratio</b>        |
|----------------------|-------------|---------------------|
| Barking and Dagenham | 1988        | 1.06<br>(0.98–1.14) |
| Barking and Dagenham | 1989        | 1.04<br>(0.95–1.13) |
| Barking and Dagenham | 1990        | 1.02<br>(0.94–1.1)  |
| Barking and Dagenham | 1991        | 0.99<br>(0.9–1.08)  |
| Barking and Dagenham | 1992        | 0.95<br>(0.86–1.03) |
| Barking and Dagenham | 1993        | 0.95<br>(0.86–1.04) |
| Barking and Dagenham | 1994        | 0.96<br>(0.88–1.05) |
| Barking and Dagenham | 1995        | 0.97<br>(0.88–1.07) |
| Barking and Dagenham | 1996        | 1.01<br>(0.91–1.12) |
| Barking and Dagenham | 1997        | 0.99<br>(0.9–1.08)  |
| Barking and Dagenham | 1998        | 1.01<br>(0.92–1.1)  |
| Barking and Dagenham | 1999        | 1.05<br>(0.96–1.14) |
| Barking and Dagenham | 2000        | 1.03<br>(0.93–1.15) |
| Barking and Dagenham | 2001        | 1.05<br>(0.96–1.16) |
| Barking and Dagenham | 2002        | 1.03<br>(0.94–1.13) |
| Barking and Dagenham | 2003        | 1.06<br>(0.96–1.17) |
| Barking and Dagenham | 2004        | 1.02<br>(0.92–1.12) |
| Barking and Dagenham | 2005        | 1.02<br>(0.92–1.14) |
| Barking and Dagenham | 2006        | 1.05<br>(0.94–1.16) |
| Barking and Dagenham | 2007        | 1.03<br>(0.94–1.15) |
| Barking and Dagenham | 2008        | 1.03<br>(0.93–1.13) |
| Barking and Dagenham | 2009        | 1.04<br>(0.94–1.15) |
| Barking and Dagenham | 2010        | 1.05<br>(0.96–1.15) |
| Barking and Dagenham | 2011        | 1.03<br>(0.93–1.14) |
| Barking and Dagenham | 2012        | 0.99<br>(0.89–1.1)  |
| Barking and Dagenham | 2013        | 0.94<br>(0.84–1.05) |
| Barking and Dagenham | 2014        | 0.9<br>(0.8–1.02)   |
| Barking and Dagenham | 2015        | 0.91<br>(0.8–1.03)  |
| Barking and Dagenham | 2016        | 0.91<br>(0.8–1.02)  |
| Barking and Dagenham | 2017        | 0.95<br>(0.79–1.12) |
| Barnet               | 1950        | 0.57<br>(0.47–0.67) |

**Table 15 Ratio of adjusted to unadjusted 5q0 values for scaled locations by year**

| <b>Geography</b> | <b>Year</b> | <b>Ratio</b>        |
|------------------|-------------|---------------------|
| Barnet           | 1951        | 0.66<br>(0.54–0.79) |
| Barnet           | 1952        | 0.62<br>(0.51–0.74) |
| Barnet           | 1953        | 0.63<br>(0.52–0.75) |
| Barnet           | 1954        | 0.6<br>(0.5–0.71)   |
| Barnet           | 1955        | 0.6<br>(0.51–0.71)  |
| Barnet           | 1956        | 0.6<br>(0.5–0.7)    |
| Barnet           | 1957        | 0.61<br>(0.51–0.72) |
| Barnet           | 1958        | 0.6<br>(0.51–0.72)  |
| Barnet           | 1959        | 0.61<br>(0.51–0.73) |
| Barnet           | 1960        | 0.63<br>(0.52–0.74) |
| Barnet           | 1961        | 0.64<br>(0.53–0.77) |
| Barnet           | 1962        | 0.67<br>(0.55–0.8)  |
| Barnet           | 1963        | 0.68<br>(0.56–0.81) |
| Barnet           | 1964        | 0.67<br>(0.55–0.8)  |
| Barnet           | 1965        | 0.66<br>(0.54–0.79) |
| Barnet           | 1966        | 0.69<br>(0.56–0.82) |
| Barnet           | 1967        | 0.68<br>(0.55–0.82) |
| Barnet           | 1968        | 0.72<br>(0.59–0.86) |
| Barnet           | 1969        | 0.74<br>(0.6–0.89)  |
| Barnet           | 1970        | 0.78<br>(0.63–0.93) |
| Barnet           | 1971        | 0.81<br>(0.67–0.97) |
| Barnet           | 1972        | 0.83<br>(0.68–0.98) |
| Barnet           | 1973        | 0.84<br>(0.71–0.98) |
| Barnet           | 1974        | 0.86<br>(0.74–1.01) |
| Barnet           | 1975        | 0.88<br>(0.75–1.02) |
| Barnet           | 1976        | 0.86<br>(0.73–1.0)  |
| Barnet           | 1977        | 0.89<br>(0.77–1.02) |
| Barnet           | 1978        | 0.95<br>(0.83–1.08) |
| Barnet           | 1979        | 0.98<br>(0.87–1.11) |
| Barnet           | 1980        | 0.97<br>(0.88–1.08) |
| Barnet           | 1981        | 0.94<br>(0.85–1.03) |

**Table 15 Ratio of adjusted to unadjusted 5q0 values for scaled locations by year**

| <b>Geography</b> | <b>Year</b> | <b>Ratio</b>        |
|------------------|-------------|---------------------|
| Barnet           | 1982        | 0.95<br>(0.87–1.04) |
| Barnet           | 1983        | 0.93<br>(0.85–1.02) |
| Barnet           | 1984        | 0.93<br>(0.86–1.01) |
| Barnet           | 1985        | 0.97<br>(0.89–1.05) |
| Barnet           | 1986        | 0.99<br>(0.92–1.08) |
| Barnet           | 1987        | 1.04<br>(0.96–1.12) |
| Barnet           | 1988        | 1.06<br>(0.98–1.14) |
| Barnet           | 1989        | 1.04<br>(0.95–1.13) |
| Barnet           | 1990        | 1.02<br>(0.94–1.1)  |
| Barnet           | 1991        | 0.99<br>(0.9–1.08)  |
| Barnet           | 1992        | 0.95<br>(0.86–1.03) |
| Barnet           | 1993        | 0.95<br>(0.86–1.04) |
| Barnet           | 1994        | 0.96<br>(0.88–1.05) |
| Barnet           | 1995        | 0.97<br>(0.88–1.07) |
| Barnet           | 1996        | 1.01<br>(0.91–1.12) |
| Barnet           | 1997        | 0.99<br>(0.9–1.08)  |
| Barnet           | 1998        | 1.01<br>(0.92–1.1)  |
| Barnet           | 1999        | 1.05<br>(0.96–1.14) |
| Barnet           | 2000        | 1.03<br>(0.93–1.15) |
| Barnet           | 2001        | 1.05<br>(0.96–1.16) |
| Barnet           | 2002        | 1.03<br>(0.94–1.13) |
| Barnet           | 2003        | 1.06<br>(0.96–1.17) |
| Barnet           | 2004        | 1.02<br>(0.92–1.12) |
| Barnet           | 2005        | 1.02<br>(0.92–1.14) |
| Barnet           | 2006        | 1.05<br>(0.94–1.16) |
| Barnet           | 2007        | 1.03<br>(0.94–1.15) |
| Barnet           | 2008        | 1.03<br>(0.93–1.13) |
| Barnet           | 2009        | 1.04<br>(0.94–1.15) |
| Barnet           | 2010        | 1.05<br>(0.96–1.15) |
| Barnet           | 2011        | 1.03<br>(0.93–1.14) |
| Barnet           | 2012        | 0.99<br>(0.89–1.1)  |

**Table 15 Ratio of adjusted to unadjusted 5q0 values for scaled locations by year**

| <b>Geography</b> | <b>Year</b> | <b>Ratio</b>        |
|------------------|-------------|---------------------|
| Barnet           | 2013        | 0.94<br>(0.84–1.05) |
| Barnet           | 2014        | 0.9<br>(0.8–1.02)   |
| Barnet           | 2015        | 0.91<br>(0.8–1.03)  |
| Barnet           | 2016        | 0.91<br>(0.8–1.02)  |
| Barnet           | 2017        | 0.95<br>(0.79–1.12) |
| Bexley           | 1950        | 0.56<br>(0.47–0.67) |
| Bexley           | 1951        | 0.66<br>(0.54–0.79) |
| Bexley           | 1952        | 0.62<br>(0.51–0.74) |
| Bexley           | 1953        | 0.63<br>(0.52–0.75) |
| Bexley           | 1954        | 0.6<br>(0.49–0.71)  |
| Bexley           | 1955        | 0.6<br>(0.51–0.71)  |
| Bexley           | 1956        | 0.6<br>(0.5–0.7)    |
| Bexley           | 1957        | 0.61<br>(0.51–0.72) |
| Bexley           | 1958        | 0.6<br>(0.5–0.72)   |
| Bexley           | 1959        | 0.61<br>(0.51–0.73) |
| Bexley           | 1960        | 0.62<br>(0.52–0.74) |
| Bexley           | 1961        | 0.64<br>(0.53–0.76) |
| Bexley           | 1962        | 0.67<br>(0.55–0.8)  |
| Bexley           | 1963        | 0.68<br>(0.56–0.81) |
| Bexley           | 1964        | 0.67<br>(0.55–0.8)  |
| Bexley           | 1965        | 0.66<br>(0.54–0.79) |
| Bexley           | 1966        | 0.69<br>(0.56–0.82) |
| Bexley           | 1967        | 0.68<br>(0.55–0.82) |
| Bexley           | 1968        | 0.72<br>(0.59–0.86) |
| Bexley           | 1969        | 0.74<br>(0.6–0.89)  |
| Bexley           | 1970        | 0.78<br>(0.63–0.93) |
| Bexley           | 1971        | 0.81<br>(0.67–0.97) |
| Bexley           | 1972        | 0.83<br>(0.68–0.98) |
| Bexley           | 1973        | 0.84<br>(0.7–0.98)  |
| Bexley           | 1974        | 0.86<br>(0.73–1.01) |
| Bexley           | 1975        | 0.88<br>(0.75–1.02) |



**Table 15 Ratio of adjusted to unadjusted 5q0 values for scaled locations by year**

| <b>Geography</b> | <b>Year</b> | <b>Ratio</b>        |
|------------------|-------------|---------------------|
| Bexley           | 1976        | 0.86<br>(0.73–1.0)  |
| Bexley           | 1977        | 0.89<br>(0.77–1.02) |
| Bexley           | 1978        | 0.95<br>(0.83–1.08) |
| Bexley           | 1979        | 0.98<br>(0.87–1.11) |
| Bexley           | 1980        | 0.97<br>(0.88–1.08) |
| Bexley           | 1981        | 0.94<br>(0.85–1.03) |
| Bexley           | 1982        | 0.95<br>(0.87–1.04) |
| Bexley           | 1983        | 0.93<br>(0.85–1.02) |
| Bexley           | 1984        | 0.93<br>(0.86–1.01) |
| Bexley           | 1985        | 0.97<br>(0.89–1.05) |
| Bexley           | 1986        | 0.99<br>(0.92–1.08) |
| Bexley           | 1987        | 1.04<br>(0.96–1.12) |
| Bexley           | 1988        | 1.06<br>(0.98–1.14) |
| Bexley           | 1989        | 1.04<br>(0.95–1.13) |
| Bexley           | 1990        | 1.02<br>(0.94–1.1)  |
| Bexley           | 1991        | 0.99<br>(0.9–1.08)  |
| Bexley           | 1992        | 0.95<br>(0.86–1.03) |
| Bexley           | 1993        | 0.95<br>(0.86–1.04) |
| Bexley           | 1994        | 0.96<br>(0.88–1.05) |
| Bexley           | 1995        | 0.97<br>(0.88–1.07) |
| Bexley           | 1996        | 1.01<br>(0.91–1.12) |
| Bexley           | 1997        | 0.99<br>(0.9–1.08)  |
| Bexley           | 1998        | 1.01<br>(0.92–1.1)  |
| Bexley           | 1999        | 1.05<br>(0.96–1.14) |
| Bexley           | 2000        | 1.03<br>(0.93–1.15) |
| Bexley           | 2001        | 1.05<br>(0.96–1.16) |
| Bexley           | 2002        | 1.03<br>(0.94–1.13) |
| Bexley           | 2003        | 1.06<br>(0.96–1.17) |
| Bexley           | 2004        | 1.02<br>(0.92–1.12) |
| Bexley           | 2005        | 1.02<br>(0.92–1.14) |
| Bexley           | 2006        | 1.05<br>(0.94–1.16) |

**Table 15 Ratio of adjusted to unadjusted 5q0 values for scaled locations by year**

| <b>Geography</b> | <b>Year</b> | <b>Ratio</b>        |
|------------------|-------------|---------------------|
| Bexley           | 2007        | 1.03<br>(0.94–1.15) |
| Bexley           | 2008        | 1.03<br>(0.93–1.13) |
| Bexley           | 2009        | 1.04<br>(0.94–1.15) |
| Bexley           | 2010        | 1.05<br>(0.96–1.15) |
| Bexley           | 2011        | 1.03<br>(0.93–1.14) |
| Bexley           | 2012        | 0.99<br>(0.89–1.1)  |
| Bexley           | 2013        | 0.94<br>(0.84–1.05) |
| Bexley           | 2014        | 0.9<br>(0.8–1.02)   |
| Bexley           | 2015        | 0.91<br>(0.8–1.03)  |
| Bexley           | 2016        | 0.91<br>(0.8–1.02)  |
| Bexley           | 2017        | 0.95<br>(0.79–1.12) |
| Brent            | 1950        | 0.57<br>(0.47–0.68) |
| Brent            | 1951        | 0.66<br>(0.54–0.79) |
| Brent            | 1952        | 0.62<br>(0.52–0.74) |
| Brent            | 1953        | 0.63<br>(0.52–0.75) |
| Brent            | 1954        | 0.6<br>(0.5–0.71)   |
| Brent            | 1955        | 0.6<br>(0.51–0.71)  |
| Brent            | 1956        | 0.6<br>(0.5–0.7)    |
| Brent            | 1957        | 0.61<br>(0.51–0.72) |
| Brent            | 1958        | 0.6<br>(0.51–0.72)  |
| Brent            | 1959        | 0.61<br>(0.51–0.73) |
| Brent            | 1960        | 0.63<br>(0.52–0.74) |
| Brent            | 1961        | 0.64<br>(0.53–0.77) |
| Brent            | 1962        | 0.67<br>(0.55–0.8)  |
| Brent            | 1963        | 0.68<br>(0.57–0.81) |
| Brent            | 1964        | 0.67<br>(0.55–0.8)  |
| Brent            | 1965        | 0.66<br>(0.54–0.79) |
| Brent            | 1966        | 0.69<br>(0.56–0.82) |
| Brent            | 1967        | 0.68<br>(0.56–0.82) |
| Brent            | 1968        | 0.72<br>(0.59–0.86) |
| Brent            | 1969        | 0.74<br>(0.6–0.89)  |

**Table 15 Ratio of adjusted to unadjusted 5q0 values for scaled locations by year**

| <b>Geography</b> | <b>Year</b> | <b>Ratio</b>        |
|------------------|-------------|---------------------|
| Brent            | 1970        | 0.78<br>(0.63–0.94) |
| Brent            | 1971        | 0.81<br>(0.67–0.97) |
| Brent            | 1972        | 0.83<br>(0.68–0.98) |
| Brent            | 1973        | 0.84<br>(0.71–0.98) |
| Brent            | 1974        | 0.86<br>(0.74–1.01) |
| Brent            | 1975        | 0.88<br>(0.75–1.02) |
| Brent            | 1976        | 0.86<br>(0.74–1.0)  |
| Brent            | 1977        | 0.89<br>(0.77–1.02) |
| Brent            | 1978        | 0.95<br>(0.83–1.08) |
| Brent            | 1979        | 0.98<br>(0.87–1.11) |
| Brent            | 1980        | 0.97<br>(0.88–1.07) |
| Brent            | 1981        | 0.94<br>(0.85–1.03) |
| Brent            | 1982        | 0.95<br>(0.87–1.04) |
| Brent            | 1983        | 0.93<br>(0.85–1.02) |
| Brent            | 1984        | 0.93<br>(0.86–1.01) |
| Brent            | 1985        | 0.97<br>(0.89–1.05) |
| Brent            | 1986        | 0.99<br>(0.92–1.08) |
| Brent            | 1987        | 1.04<br>(0.96–1.12) |
| Brent            | 1988        | 1.06<br>(0.98–1.14) |
| Brent            | 1989        | 1.04<br>(0.95–1.13) |
| Brent            | 1990        | 1.02<br>(0.94–1.1)  |
| Brent            | 1991        | 0.99<br>(0.9–1.08)  |
| Brent            | 1992        | 0.95<br>(0.86–1.03) |
| Brent            | 1993        | 0.95<br>(0.86–1.04) |
| Brent            | 1994        | 0.96<br>(0.88–1.05) |
| Brent            | 1995        | 0.97<br>(0.88–1.07) |
| Brent            | 1996        | 1.01<br>(0.91–1.12) |
| Brent            | 1997        | 0.99<br>(0.9–1.08)  |
| Brent            | 1998        | 1.01<br>(0.92–1.1)  |
| Brent            | 1999        | 1.05<br>(0.96–1.14) |
| Brent            | 2000        | 1.03<br>(0.93–1.15) |

**Table 15 Ratio of adjusted to unadjusted 5q0 values for scaled locations by year**

| <b>Geography</b> | <b>Year</b> | <b>Ratio</b>        |
|------------------|-------------|---------------------|
| Brent            | 2001        | 1.05<br>(0.96–1.16) |
| Brent            | 2002        | 1.03<br>(0.94–1.13) |
| Brent            | 2003        | 1.06<br>(0.96–1.17) |
| Brent            | 2004        | 1.02<br>(0.92–1.12) |
| Brent            | 2005        | 1.02<br>(0.92–1.14) |
| Brent            | 2006        | 1.05<br>(0.94–1.16) |
| Brent            | 2007        | 1.03<br>(0.94–1.15) |
| Brent            | 2008        | 1.03<br>(0.93–1.13) |
| Brent            | 2009        | 1.04<br>(0.94–1.15) |
| Brent            | 2010        | 1.05<br>(0.96–1.15) |
| Brent            | 2011        | 1.03<br>(0.93–1.14) |
| Brent            | 2012        | 0.99<br>(0.89–1.1)  |
| Brent            | 2013        | 0.94<br>(0.84–1.05) |
| Brent            | 2014        | 0.9<br>(0.8–1.02)   |
| Brent            | 2015        | 0.91<br>(0.8–1.03)  |
| Brent            | 2016        | 0.91<br>(0.8–1.02)  |
| Brent            | 2017        | 0.95<br>(0.79–1.12) |
| Bromley          | 1950        | 0.56<br>(0.47–0.67) |
| Bromley          | 1951        | 0.66<br>(0.54–0.79) |
| Bromley          | 1952        | 0.62<br>(0.51–0.74) |
| Bromley          | 1953        | 0.63<br>(0.52–0.75) |
| Bromley          | 1954        | 0.6<br>(0.49–0.71)  |
| Bromley          | 1955        | 0.6<br>(0.51–0.71)  |
| Bromley          | 1956        | 0.6<br>(0.5–0.7)    |
| Bromley          | 1957        | 0.61<br>(0.51–0.72) |
| Bromley          | 1958        | 0.6<br>(0.51–0.72)  |
| Bromley          | 1959        | 0.61<br>(0.51–0.73) |
| Bromley          | 1960        | 0.62<br>(0.52–0.74) |
| Bromley          | 1961        | 0.64<br>(0.53–0.77) |
| Bromley          | 1962        | 0.67<br>(0.55–0.8)  |
| Bromley          | 1963        | 0.68<br>(0.56–0.81) |

**Table 15 Ratio of adjusted to unadjusted 5q0 values for scaled locations by year**

| <b>Geography</b> | <b>Year</b> | <b>Ratio</b>        |
|------------------|-------------|---------------------|
| Bromley          | 1964        | 0.67<br>(0.55–0.8)  |
| Bromley          | 1965        | 0.66<br>(0.54–0.79) |
| Bromley          | 1966        | 0.69<br>(0.56–0.82) |
| Bromley          | 1967        | 0.68<br>(0.55–0.82) |
| Bromley          | 1968        | 0.72<br>(0.59–0.86) |
| Bromley          | 1969        | 0.74<br>(0.6–0.89)  |
| Bromley          | 1970        | 0.78<br>(0.63–0.93) |
| Bromley          | 1971        | 0.81<br>(0.67–0.97) |
| Bromley          | 1972        | 0.83<br>(0.68–0.98) |
| Bromley          | 1973        | 0.84<br>(0.71–0.98) |
| Bromley          | 1974        | 0.86<br>(0.73–1.01) |
| Bromley          | 1975        | 0.88<br>(0.75–1.02) |
| Bromley          | 1976        | 0.86<br>(0.73–1.0)  |
| Bromley          | 1977        | 0.89<br>(0.77–1.02) |
| Bromley          | 1978        | 0.95<br>(0.83–1.08) |
| Bromley          | 1979        | 0.98<br>(0.87–1.11) |
| Bromley          | 1980        | 0.97<br>(0.88–1.08) |
| Bromley          | 1981        | 0.94<br>(0.85–1.03) |
| Bromley          | 1982        | 0.95<br>(0.87–1.04) |
| Bromley          | 1983        | 0.93<br>(0.85–1.02) |
| Bromley          | 1984        | 0.93<br>(0.86–1.01) |
| Bromley          | 1985        | 0.97<br>(0.89–1.05) |
| Bromley          | 1986        | 0.99<br>(0.92–1.08) |
| Bromley          | 1987        | 1.04<br>(0.96–1.12) |
| Bromley          | 1988        | 1.06<br>(0.98–1.14) |
| Bromley          | 1989        | 1.04<br>(0.95–1.13) |
| Bromley          | 1990        | 1.02<br>(0.94–1.1)  |
| Bromley          | 1991        | 0.99<br>(0.9–1.08)  |
| Bromley          | 1992        | 0.95<br>(0.86–1.03) |
| Bromley          | 1993        | 0.95<br>(0.86–1.04) |
| Bromley          | 1994        | 0.96<br>(0.88–1.05) |

**Table 15 Ratio of adjusted to unadjusted 5q0 values for scaled locations by year**

| <b>Geography</b> | <b>Year</b> | <b>Ratio</b>        |
|------------------|-------------|---------------------|
| Bromley          | 1995        | 0.97<br>(0.88–1.07) |
| Bromley          | 1996        | 1.01<br>(0.91–1.12) |
| Bromley          | 1997        | 0.99<br>(0.9–1.08)  |
| Bromley          | 1998        | 1.01<br>(0.92–1.1)  |
| Bromley          | 1999        | 1.05<br>(0.96–1.14) |
| Bromley          | 2000        | 1.03<br>(0.93–1.15) |
| Bromley          | 2001        | 1.05<br>(0.96–1.16) |
| Bromley          | 2002        | 1.03<br>(0.94–1.13) |
| Bromley          | 2003        | 1.06<br>(0.96–1.17) |
| Bromley          | 2004        | 1.02<br>(0.92–1.12) |
| Bromley          | 2005        | 1.02<br>(0.92–1.14) |
| Bromley          | 2006        | 1.05<br>(0.94–1.16) |
| Bromley          | 2007        | 1.03<br>(0.94–1.15) |
| Bromley          | 2008        | 1.03<br>(0.93–1.13) |
| Bromley          | 2009        | 1.04<br>(0.94–1.15) |
| Bromley          | 2010        | 1.05<br>(0.96–1.15) |
| Bromley          | 2011        | 1.03<br>(0.93–1.14) |
| Bromley          | 2012        | 0.99<br>(0.89–1.1)  |
| Bromley          | 2013        | 0.94<br>(0.84–1.05) |
| Bromley          | 2014        | 0.9<br>(0.8–1.02)   |
| Bromley          | 2015        | 0.91<br>(0.8–1.03)  |
| Bromley          | 2016        | 0.91<br>(0.8–1.02)  |
| Bromley          | 2017        | 0.95<br>(0.79–1.12) |
| Camden           | 1950        | 0.57<br>(0.47–0.67) |
| Camden           | 1951        | 0.66<br>(0.54–0.79) |
| Camden           | 1952        | 0.62<br>(0.51–0.74) |
| Camden           | 1953        | 0.63<br>(0.52–0.75) |
| Camden           | 1954        | 0.6<br>(0.5–0.71)   |
| Camden           | 1955        | 0.6<br>(0.51–0.71)  |
| Camden           | 1956        | 0.6<br>(0.5–0.7)    |
| Camden           | 1957        | 0.61<br>(0.51–0.72) |

**Table 15 Ratio of adjusted to unadjusted 5q0 values for scaled locations by year**

| <b>Geography</b> | <b>Year</b> | <b>Ratio</b>        |
|------------------|-------------|---------------------|
| Camden           | 1958        | 0.6<br>(0.51–0.72)  |
| Camden           | 1959        | 0.61<br>(0.51–0.73) |
| Camden           | 1960        | 0.63<br>(0.52–0.74) |
| Camden           | 1961        | 0.64<br>(0.53–0.77) |
| Camden           | 1962        | 0.67<br>(0.55–0.8)  |
| Camden           | 1963        | 0.68<br>(0.56–0.81) |
| Camden           | 1964        | 0.67<br>(0.55–0.8)  |
| Camden           | 1965        | 0.66<br>(0.54–0.79) |
| Camden           | 1966        | 0.69<br>(0.56–0.82) |
| Camden           | 1967        | 0.68<br>(0.56–0.82) |
| Camden           | 1968        | 0.72<br>(0.59–0.86) |
| Camden           | 1969        | 0.74<br>(0.6–0.89)  |
| Camden           | 1970        | 0.78<br>(0.63–0.93) |
| Camden           | 1971        | 0.81<br>(0.67–0.97) |
| Camden           | 1972        | 0.83<br>(0.68–0.98) |
| Camden           | 1973        | 0.84<br>(0.71–0.98) |
| Camden           | 1974        | 0.86<br>(0.74–1.01) |
| Camden           | 1975        | 0.88<br>(0.75–1.02) |
| Camden           | 1976        | 0.86<br>(0.73–1.0)  |
| Camden           | 1977        | 0.89<br>(0.77–1.02) |
| Camden           | 1978        | 0.95<br>(0.83–1.08) |
| Camden           | 1979        | 0.98<br>(0.87–1.11) |
| Camden           | 1980        | 0.97<br>(0.88–1.08) |
| Camden           | 1981        | 0.94<br>(0.85–1.03) |
| Camden           | 1982        | 0.95<br>(0.87–1.04) |
| Camden           | 1983        | 0.93<br>(0.85–1.02) |
| Camden           | 1984        | 0.93<br>(0.86–1.01) |
| Camden           | 1985        | 0.97<br>(0.89–1.05) |
| Camden           | 1986        | 0.99<br>(0.92–1.08) |
| Camden           | 1987        | 1.04<br>(0.96–1.12) |
| Camden           | 1988        | 1.06<br>(0.98–1.14) |

**Table 15 Ratio of adjusted to unadjusted 5q0 values for scaled locations by year**

| <b>Geography</b> | <b>Year</b> | <b>Ratio</b>        |
|------------------|-------------|---------------------|
| Camden           | 1989        | 1.04<br>(0.95–1.13) |
| Camden           | 1990        | 1.02<br>(0.94–1.1)  |
| Camden           | 1991        | 0.99<br>(0.9–1.08)  |
| Camden           | 1992        | 0.95<br>(0.86–1.03) |
| Camden           | 1993        | 0.95<br>(0.86–1.04) |
| Camden           | 1994        | 0.96<br>(0.88–1.05) |
| Camden           | 1995        | 0.97<br>(0.88–1.07) |
| Camden           | 1996        | 1.01<br>(0.91–1.12) |
| Camden           | 1997        | 0.99<br>(0.9–1.08)  |
| Camden           | 1998        | 1.01<br>(0.92–1.1)  |
| Camden           | 1999        | 1.05<br>(0.96–1.14) |
| Camden           | 2000        | 1.03<br>(0.93–1.15) |
| Camden           | 2001        | 1.05<br>(0.96–1.16) |
| Camden           | 2002        | 1.03<br>(0.94–1.13) |
| Camden           | 2003        | 1.06<br>(0.96–1.17) |
| Camden           | 2004        | 1.02<br>(0.92–1.12) |
| Camden           | 2005        | 1.02<br>(0.92–1.14) |
| Camden           | 2006        | 1.05<br>(0.94–1.16) |
| Camden           | 2007        | 1.03<br>(0.94–1.15) |
| Camden           | 2008        | 1.03<br>(0.93–1.13) |
| Camden           | 2009        | 1.04<br>(0.94–1.15) |
| Camden           | 2010        | 1.05<br>(0.96–1.15) |
| Camden           | 2011        | 1.03<br>(0.93–1.14) |
| Camden           | 2012        | 0.99<br>(0.89–1.1)  |
| Camden           | 2013        | 0.94<br>(0.84–1.05) |
| Camden           | 2014        | 0.9<br>(0.8–1.02)   |
| Camden           | 2015        | 0.91<br>(0.8–1.03)  |
| Camden           | 2016        | 0.91<br>(0.8–1.02)  |
| Camden           | 2017        | 0.95<br>(0.79–1.12) |
| Croydon          | 1950        | 0.57<br>(0.47–0.67) |
| Croydon          | 1951        | 0.66<br>(0.54–0.79) |



**Table 15 Ratio of adjusted to unadjusted 5q0 values for scaled locations by year**

| <b>Geography</b> | <b>Year</b> | <b>Ratio</b>        |
|------------------|-------------|---------------------|
| Croydon          | 1952        | 0.62<br>(0.51–0.74) |
| Croydon          | 1953        | 0.63<br>(0.52–0.75) |
| Croydon          | 1954        | 0.6<br>(0.5–0.71)   |
| Croydon          | 1955        | 0.6<br>(0.51–0.71)  |
| Croydon          | 1956        | 0.6<br>(0.5–0.7)    |
| Croydon          | 1957        | 0.61<br>(0.51–0.72) |
| Croydon          | 1958        | 0.6<br>(0.51–0.72)  |
| Croydon          | 1959        | 0.61<br>(0.51–0.73) |
| Croydon          | 1960        | 0.63<br>(0.52–0.74) |
| Croydon          | 1961        | 0.64<br>(0.53–0.77) |
| Croydon          | 1962        | 0.67<br>(0.55–0.8)  |
| Croydon          | 1963        | 0.68<br>(0.56–0.81) |
| Croydon          | 1964        | 0.67<br>(0.55–0.8)  |
| Croydon          | 1965        | 0.66<br>(0.54–0.79) |
| Croydon          | 1966        | 0.69<br>(0.56–0.82) |
| Croydon          | 1967        | 0.68<br>(0.55–0.82) |
| Croydon          | 1968        | 0.72<br>(0.59–0.86) |
| Croydon          | 1969        | 0.74<br>(0.6–0.89)  |
| Croydon          | 1970        | 0.78<br>(0.63–0.93) |
| Croydon          | 1971        | 0.81<br>(0.67–0.97) |
| Croydon          | 1972        | 0.83<br>(0.68–0.98) |
| Croydon          | 1973        | 0.84<br>(0.71–0.98) |
| Croydon          | 1974        | 0.86<br>(0.74–1.01) |
| Croydon          | 1975        | 0.88<br>(0.75–1.02) |
| Croydon          | 1976        | 0.86<br>(0.73–1.0)  |
| Croydon          | 1977        | 0.89<br>(0.77–1.02) |
| Croydon          | 1978        | 0.95<br>(0.83–1.08) |
| Croydon          | 1979        | 0.98<br>(0.87–1.11) |
| Croydon          | 1980        | 0.97<br>(0.88–1.08) |
| Croydon          | 1981        | 0.94<br>(0.85–1.03) |
| Croydon          | 1982        | 0.95<br>(0.87–1.04) |

**Table 15 Ratio of adjusted to unadjusted 5q0 values for scaled locations by year**

| <b>Geography</b> | <b>Year</b> | <b>Ratio</b>        |
|------------------|-------------|---------------------|
| Croydon          | 1983        | 0.93<br>(0.85–1.02) |
| Croydon          | 1984        | 0.93<br>(0.86–1.01) |
| Croydon          | 1985        | 0.97<br>(0.89–1.05) |
| Croydon          | 1986        | 0.99<br>(0.92–1.08) |
| Croydon          | 1987        | 1.04<br>(0.96–1.12) |
| Croydon          | 1988        | 1.06<br>(0.98–1.14) |
| Croydon          | 1989        | 1.04<br>(0.95–1.13) |
| Croydon          | 1990        | 1.02<br>(0.94–1.1)  |
| Croydon          | 1991        | 0.99<br>(0.9–1.08)  |
| Croydon          | 1992        | 0.95<br>(0.86–1.03) |
| Croydon          | 1993        | 0.95<br>(0.86–1.04) |
| Croydon          | 1994        | 0.96<br>(0.88–1.05) |
| Croydon          | 1995        | 0.97<br>(0.88–1.07) |
| Croydon          | 1996        | 1.01<br>(0.91–1.12) |
| Croydon          | 1997        | 0.99<br>(0.9–1.08)  |
| Croydon          | 1998        | 1.01<br>(0.92–1.1)  |
| Croydon          | 1999        | 1.05<br>(0.96–1.14) |
| Croydon          | 2000        | 1.03<br>(0.93–1.15) |
| Croydon          | 2001        | 1.05<br>(0.96–1.16) |
| Croydon          | 2002        | 1.03<br>(0.94–1.13) |
| Croydon          | 2003        | 1.06<br>(0.96–1.17) |
| Croydon          | 2004        | 1.02<br>(0.92–1.12) |
| Croydon          | 2005        | 1.02<br>(0.92–1.14) |
| Croydon          | 2006        | 1.05<br>(0.94–1.16) |
| Croydon          | 2007        | 1.03<br>(0.94–1.15) |
| Croydon          | 2008        | 1.03<br>(0.93–1.13) |
| Croydon          | 2009        | 1.04<br>(0.94–1.15) |
| Croydon          | 2010        | 1.05<br>(0.96–1.15) |
| Croydon          | 2011        | 1.03<br>(0.93–1.14) |
| Croydon          | 2012        | 0.99<br>(0.89–1.1)  |
| Croydon          | 2013        | 0.94<br>(0.84–1.05) |

**Table 15 Ratio of adjusted to unadjusted 5q0 values for scaled locations by year**

| <b>Geography</b> | <b>Year</b> | <b>Ratio</b>        |
|------------------|-------------|---------------------|
| Croydon          | 2014        | 0.9<br>(0.8–1.02)   |
| Croydon          | 2015        | 0.91<br>(0.8–1.03)  |
| Croydon          | 2016        | 0.91<br>(0.8–1.02)  |
| Croydon          | 2017        | 0.95<br>(0.79–1.12) |
| Ealing           | 1950        | 0.57<br>(0.47–0.67) |
| Ealing           | 1951        | 0.66<br>(0.54–0.79) |
| Ealing           | 1952        | 0.62<br>(0.51–0.74) |
| Ealing           | 1953        | 0.63<br>(0.52–0.75) |
| Ealing           | 1954        | 0.6<br>(0.5–0.71)   |
| Ealing           | 1955        | 0.6<br>(0.51–0.71)  |
| Ealing           | 1956        | 0.6<br>(0.5–0.7)    |
| Ealing           | 1957        | 0.61<br>(0.51–0.72) |
| Ealing           | 1958        | 0.6<br>(0.51–0.72)  |
| Ealing           | 1959        | 0.61<br>(0.51–0.73) |
| Ealing           | 1960        | 0.63<br>(0.52–0.74) |
| Ealing           | 1961        | 0.64<br>(0.53–0.77) |
| Ealing           | 1962        | 0.67<br>(0.55–0.8)  |
| Ealing           | 1963        | 0.68<br>(0.56–0.81) |
| Ealing           | 1964        | 0.67<br>(0.55–0.8)  |
| Ealing           | 1965        | 0.66<br>(0.54–0.79) |
| Ealing           | 1966        | 0.69<br>(0.56–0.82) |
| Ealing           | 1967        | 0.68<br>(0.55–0.82) |
| Ealing           | 1968        | 0.72<br>(0.59–0.86) |
| Ealing           | 1969        | 0.74<br>(0.6–0.89)  |
| Ealing           | 1970        | 0.78<br>(0.63–0.93) |
| Ealing           | 1971        | 0.81<br>(0.67–0.97) |
| Ealing           | 1972        | 0.83<br>(0.68–0.98) |
| Ealing           | 1973        | 0.84<br>(0.71–0.98) |
| Ealing           | 1974        | 0.86<br>(0.74–1.01) |
| Ealing           | 1975        | 0.88<br>(0.75–1.02) |
| Ealing           | 1976        | 0.86<br>(0.73–1.0)  |

**Table 15 Ratio of adjusted to unadjusted 5q0 values for scaled locations by year**

| <b>Geography</b> | <b>Year</b> | <b>Ratio</b>        |
|------------------|-------------|---------------------|
| Ealing           | 1977        | 0.89<br>(0.77–1.02) |
| Ealing           | 1978        | 0.95<br>(0.83–1.08) |
| Ealing           | 1979        | 0.98<br>(0.87–1.11) |
| Ealing           | 1980        | 0.97<br>(0.88–1.08) |
| Ealing           | 1981        | 0.94<br>(0.85–1.03) |
| Ealing           | 1982        | 0.95<br>(0.87–1.04) |
| Ealing           | 1983        | 0.93<br>(0.85–1.02) |
| Ealing           | 1984        | 0.93<br>(0.86–1.01) |
| Ealing           | 1985        | 0.97<br>(0.89–1.05) |
| Ealing           | 1986        | 0.99<br>(0.92–1.08) |
| Ealing           | 1987        | 1.04<br>(0.96–1.12) |
| Ealing           | 1988        | 1.06<br>(0.98–1.14) |
| Ealing           | 1989        | 1.04<br>(0.95–1.13) |
| Ealing           | 1990        | 1.02<br>(0.94–1.1)  |
| Ealing           | 1991        | 0.99<br>(0.9–1.08)  |
| Ealing           | 1992        | 0.95<br>(0.86–1.03) |
| Ealing           | 1993        | 0.95<br>(0.86–1.04) |
| Ealing           | 1994        | 0.96<br>(0.88–1.05) |
| Ealing           | 1995        | 0.97<br>(0.88–1.07) |
| Ealing           | 1996        | 1.01<br>(0.91–1.12) |
| Ealing           | 1997        | 0.99<br>(0.9–1.08)  |
| Ealing           | 1998        | 1.01<br>(0.92–1.1)  |
| Ealing           | 1999        | 1.05<br>(0.96–1.14) |
| Ealing           | 2000        | 1.03<br>(0.93–1.15) |
| Ealing           | 2001        | 1.05<br>(0.96–1.16) |
| Ealing           | 2002        | 1.03<br>(0.94–1.13) |
| Ealing           | 2003        | 1.06<br>(0.96–1.17) |
| Ealing           | 2004        | 1.02<br>(0.92–1.12) |
| Ealing           | 2005        | 1.02<br>(0.92–1.14) |
| Ealing           | 2006        | 1.05<br>(0.94–1.16) |
| Ealing           | 2007        | 1.03<br>(0.94–1.15) |

**Table 15 Ratio of adjusted to unadjusted 5q0 values for scaled locations by year**

| <b>Geography</b> | <b>Year</b> | <b>Ratio</b>        |
|------------------|-------------|---------------------|
| Ealing           | 2008        | 1.03<br>(0.93–1.13) |
| Ealing           | 2009        | 1.04<br>(0.94–1.15) |
| Ealing           | 2010        | 1.05<br>(0.96–1.15) |
| Ealing           | 2011        | 1.03<br>(0.93–1.14) |
| Ealing           | 2012        | 0.99<br>(0.89–1.1)  |
| Ealing           | 2013        | 0.94<br>(0.84–1.05) |
| Ealing           | 2014        | 0.9<br>(0.8–1.02)   |
| Ealing           | 2015        | 0.91<br>(0.8–1.03)  |
| Ealing           | 2016        | 0.91<br>(0.8–1.02)  |
| Ealing           | 2017        | 0.95<br>(0.79–1.12) |
| Enfield          | 1950        | 0.57<br>(0.47–0.67) |
| Enfield          | 1951        | 0.66<br>(0.54–0.79) |
| Enfield          | 1952        | 0.62<br>(0.51–0.74) |
| Enfield          | 1953        | 0.63<br>(0.52–0.75) |
| Enfield          | 1954        | 0.6<br>(0.5–0.71)   |
| Enfield          | 1955        | 0.6<br>(0.51–0.71)  |
| Enfield          | 1956        | 0.6<br>(0.5–0.7)    |
| Enfield          | 1957        | 0.61<br>(0.51–0.72) |
| Enfield          | 1958        | 0.6<br>(0.51–0.72)  |
| Enfield          | 1959        | 0.61<br>(0.51–0.73) |
| Enfield          | 1960        | 0.63<br>(0.52–0.74) |
| Enfield          | 1961        | 0.64<br>(0.53–0.77) |
| Enfield          | 1962        | 0.67<br>(0.55–0.8)  |
| Enfield          | 1963        | 0.68<br>(0.56–0.81) |
| Enfield          | 1964        | 0.67<br>(0.55–0.8)  |
| Enfield          | 1965        | 0.66<br>(0.54–0.79) |
| Enfield          | 1966        | 0.69<br>(0.56–0.82) |
| Enfield          | 1967        | 0.68<br>(0.55–0.82) |
| Enfield          | 1968        | 0.72<br>(0.59–0.86) |
| Enfield          | 1969        | 0.74<br>(0.6–0.89)  |
| Enfield          | 1970        | 0.78<br>(0.63–0.93) |

**Table 15 Ratio of adjusted to unadjusted 5q0 values for scaled locations by year**

| <b>Geography</b> | <b>Year</b> | <b>Ratio</b>        |
|------------------|-------------|---------------------|
| Enfield          | 1971        | 0.81<br>(0.67–0.97) |
| Enfield          | 1972        | 0.83<br>(0.68–0.98) |
| Enfield          | 1973        | 0.84<br>(0.71–0.98) |
| Enfield          | 1974        | 0.86<br>(0.74–1.01) |
| Enfield          | 1975        | 0.88<br>(0.75–1.02) |
| Enfield          | 1976        | 0.86<br>(0.73–1.0)  |
| Enfield          | 1977        | 0.89<br>(0.77–1.02) |
| Enfield          | 1978        | 0.95<br>(0.83–1.08) |
| Enfield          | 1979        | 0.98<br>(0.87–1.11) |
| Enfield          | 1980        | 0.97<br>(0.88–1.08) |
| Enfield          | 1981        | 0.94<br>(0.85–1.03) |
| Enfield          | 1982        | 0.95<br>(0.87–1.04) |
| Enfield          | 1983        | 0.93<br>(0.85–1.02) |
| Enfield          | 1984        | 0.93<br>(0.86–1.01) |
| Enfield          | 1985        | 0.97<br>(0.89–1.05) |
| Enfield          | 1986        | 0.99<br>(0.92–1.08) |
| Enfield          | 1987        | 1.04<br>(0.96–1.12) |
| Enfield          | 1988        | 1.06<br>(0.98–1.14) |
| Enfield          | 1989        | 1.04<br>(0.95–1.13) |
| Enfield          | 1990        | 1.02<br>(0.94–1.1)  |
| Enfield          | 1991        | 0.99<br>(0.9–1.08)  |
| Enfield          | 1992        | 0.95<br>(0.86–1.03) |
| Enfield          | 1993        | 0.95<br>(0.86–1.04) |
| Enfield          | 1994        | 0.96<br>(0.88–1.05) |
| Enfield          | 1995        | 0.97<br>(0.88–1.07) |
| Enfield          | 1996        | 1.01<br>(0.91–1.12) |
| Enfield          | 1997        | 0.99<br>(0.9–1.08)  |
| Enfield          | 1998        | 1.01<br>(0.92–1.1)  |
| Enfield          | 1999        | 1.05<br>(0.96–1.14) |
| Enfield          | 2000        | 1.03<br>(0.93–1.15) |
| Enfield          | 2001        | 1.05<br>(0.96–1.16) |

**Table 15 Ratio of adjusted to unadjusted 5q0 values for scaled locations by year**

| <b>Geography</b> | <b>Year</b> | <b>Ratio</b>        |
|------------------|-------------|---------------------|
| Enfield          | 2002        | 1.03<br>(0.94–1.13) |
| Enfield          | 2003        | 1.06<br>(0.96–1.17) |
| Enfield          | 2004        | 1.02<br>(0.92–1.12) |
| Enfield          | 2005        | 1.02<br>(0.92–1.14) |
| Enfield          | 2006        | 1.05<br>(0.94–1.16) |
| Enfield          | 2007        | 1.03<br>(0.94–1.15) |
| Enfield          | 2008        | 1.03<br>(0.93–1.13) |
| Enfield          | 2009        | 1.04<br>(0.94–1.15) |
| Enfield          | 2010        | 1.05<br>(0.96–1.15) |
| Enfield          | 2011        | 1.03<br>(0.93–1.14) |
| Enfield          | 2012        | 0.99<br>(0.89–1.1)  |
| Enfield          | 2013        | 0.94<br>(0.84–1.05) |
| Enfield          | 2014        | 0.9<br>(0.8–1.02)   |
| Enfield          | 2015        | 0.91<br>(0.8–1.03)  |
| Enfield          | 2016        | 0.91<br>(0.8–1.02)  |
| Enfield          | 2017        | 0.95<br>(0.79–1.12) |
| Greenwich        | 1950        | 0.57<br>(0.47–0.68) |
| Greenwich        | 1951        | 0.66<br>(0.55–0.79) |
| Greenwich        | 1952        | 0.62<br>(0.52–0.74) |
| Greenwich        | 1953        | 0.63<br>(0.52–0.75) |
| Greenwich        | 1954        | 0.6<br>(0.5–0.71)   |
| Greenwich        | 1955        | 0.6<br>(0.51–0.71)  |
| Greenwich        | 1956        | 0.6<br>(0.5–0.7)    |
| Greenwich        | 1957        | 0.61<br>(0.51–0.72) |
| Greenwich        | 1958        | 0.61<br>(0.51–0.72) |
| Greenwich        | 1959        | 0.61<br>(0.51–0.73) |
| Greenwich        | 1960        | 0.63<br>(0.52–0.75) |
| Greenwich        | 1961        | 0.64<br>(0.53–0.77) |
| Greenwich        | 1962        | 0.67<br>(0.55–0.8)  |
| Greenwich        | 1963        | 0.68<br>(0.57–0.81) |
| Greenwich        | 1964        | 0.67<br>(0.55–0.8)  |

**Table 15 Ratio of adjusted to unadjusted 5q0 values for scaled locations by year**

| <b>Geography</b> | <b>Year</b> | <b>Ratio</b>        |
|------------------|-------------|---------------------|
| Greenwich        | 1965        | 0.66<br>(0.54–0.79) |
| Greenwich        | 1966        | 0.69<br>(0.56–0.82) |
| Greenwich        | 1967        | 0.68<br>(0.56–0.82) |
| Greenwich        | 1968        | 0.72<br>(0.59–0.86) |
| Greenwich        | 1969        | 0.74<br>(0.6–0.89)  |
| Greenwich        | 1970        | 0.78<br>(0.63–0.94) |
| Greenwich        | 1971        | 0.81<br>(0.67–0.97) |
| Greenwich        | 1972        | 0.83<br>(0.68–0.98) |
| Greenwich        | 1973        | 0.84<br>(0.71–0.98) |
| Greenwich        | 1974        | 0.86<br>(0.74–1.01) |
| Greenwich        | 1975        | 0.88<br>(0.75–1.02) |
| Greenwich        | 1976        | 0.86<br>(0.74–1.0)  |
| Greenwich        | 1977        | 0.89<br>(0.77–1.02) |
| Greenwich        | 1978        | 0.95<br>(0.83–1.08) |
| Greenwich        | 1979        | 0.98<br>(0.87–1.11) |
| Greenwich        | 1980        | 0.97<br>(0.88–1.07) |
| Greenwich        | 1981        | 0.94<br>(0.85–1.03) |
| Greenwich        | 1982        | 0.95<br>(0.87–1.04) |
| Greenwich        | 1983        | 0.93<br>(0.85–1.02) |
| Greenwich        | 1984        | 0.93<br>(0.86–1.01) |
| Greenwich        | 1985        | 0.97<br>(0.89–1.05) |
| Greenwich        | 1986        | 0.99<br>(0.92–1.08) |
| Greenwich        | 1987        | 1.04<br>(0.96–1.12) |
| Greenwich        | 1988        | 1.06<br>(0.98–1.14) |
| Greenwich        | 1989        | 1.04<br>(0.95–1.13) |
| Greenwich        | 1990        | 1.02<br>(0.94–1.1)  |
| Greenwich        | 1991        | 0.99<br>(0.9–1.08)  |
| Greenwich        | 1992        | 0.95<br>(0.86–1.03) |
| Greenwich        | 1993        | 0.95<br>(0.86–1.04) |
| Greenwich        | 1994        | 0.96<br>(0.88–1.05) |
| Greenwich        | 1995        | 0.97<br>(0.88–1.07) |



**Table 15 Ratio of adjusted to unadjusted 5q0 values for scaled locations by year**

| <b>Geography</b> | <b>Year</b> | <b>Ratio</b>        |
|------------------|-------------|---------------------|
| Greenwich        | 1996        | 1.01<br>(0.91–1.12) |
| Greenwich        | 1997        | 0.99<br>(0.9–1.08)  |
| Greenwich        | 1998        | 1.01<br>(0.92–1.1)  |
| Greenwich        | 1999        | 1.05<br>(0.96–1.14) |
| Greenwich        | 2000        | 1.03<br>(0.93–1.15) |
| Greenwich        | 2001        | 1.05<br>(0.96–1.16) |
| Greenwich        | 2002        | 1.03<br>(0.94–1.13) |
| Greenwich        | 2003        | 1.06<br>(0.96–1.17) |
| Greenwich        | 2004        | 1.02<br>(0.92–1.12) |
| Greenwich        | 2005        | 1.02<br>(0.92–1.14) |
| Greenwich        | 2006        | 1.05<br>(0.94–1.16) |
| Greenwich        | 2007        | 1.03<br>(0.94–1.15) |
| Greenwich        | 2008        | 1.03<br>(0.93–1.13) |
| Greenwich        | 2009        | 1.04<br>(0.94–1.15) |
| Greenwich        | 2010        | 1.05<br>(0.96–1.15) |
| Greenwich        | 2011        | 1.03<br>(0.93–1.14) |
| Greenwich        | 2012        | 0.99<br>(0.89–1.1)  |
| Greenwich        | 2013        | 0.94<br>(0.84–1.05) |
| Greenwich        | 2014        | 0.9<br>(0.8–1.02)   |
| Greenwich        | 2015        | 0.91<br>(0.8–1.03)  |
| Greenwich        | 2016        | 0.91<br>(0.8–1.02)  |
| Greenwich        | 2017        | 0.95<br>(0.79–1.12) |
| Hackney          | 1950        | 0.57<br>(0.47–0.68) |
| Hackney          | 1951        | 0.66<br>(0.54–0.79) |
| Hackney          | 1952        | 0.62<br>(0.52–0.74) |
| Hackney          | 1953        | 0.63<br>(0.52–0.75) |
| Hackney          | 1954        | 0.6<br>(0.5–0.71)   |
| Hackney          | 1955        | 0.6<br>(0.51–0.71)  |
| Hackney          | 1956        | 0.6<br>(0.5–0.7)    |
| Hackney          | 1957        | 0.61<br>(0.51–0.72) |
| Hackney          | 1958        | 0.6<br>(0.51–0.72)  |

**Table 15 Ratio of adjusted to unadjusted 5q0 values for scaled locations by year**

| <b>Geography</b> | <b>Year</b> | <b>Ratio</b>        |
|------------------|-------------|---------------------|
| Hackney          | 1959        | 0.61<br>(0.51–0.73) |
| Hackney          | 1960        | 0.63<br>(0.52–0.74) |
| Hackney          | 1961        | 0.64<br>(0.53–0.77) |
| Hackney          | 1962        | 0.67<br>(0.55–0.8)  |
| Hackney          | 1963        | 0.68<br>(0.57–0.81) |
| Hackney          | 1964        | 0.67<br>(0.55–0.8)  |
| Hackney          | 1965        | 0.66<br>(0.54–0.79) |
| Hackney          | 1966        | 0.69<br>(0.56–0.82) |
| Hackney          | 1967        | 0.68<br>(0.56–0.82) |
| Hackney          | 1968        | 0.72<br>(0.59–0.86) |
| Hackney          | 1969        | 0.74<br>(0.6–0.89)  |
| Hackney          | 1970        | 0.78<br>(0.63–0.93) |
| Hackney          | 1971        | 0.81<br>(0.67–0.97) |
| Hackney          | 1972        | 0.83<br>(0.68–0.98) |
| Hackney          | 1973        | 0.84<br>(0.71–0.98) |
| Hackney          | 1974        | 0.86<br>(0.74–1.01) |
| Hackney          | 1975        | 0.88<br>(0.75–1.02) |
| Hackney          | 1976        | 0.86<br>(0.74–1.0)  |
| Hackney          | 1977        | 0.89<br>(0.77–1.02) |
| Hackney          | 1978        | 0.95<br>(0.83–1.08) |
| Hackney          | 1979        | 0.98<br>(0.87–1.11) |
| Hackney          | 1980        | 0.97<br>(0.88–1.08) |
| Hackney          | 1981        | 0.94<br>(0.85–1.03) |
| Hackney          | 1982        | 0.95<br>(0.87–1.04) |
| Hackney          | 1983        | 0.93<br>(0.85–1.02) |
| Hackney          | 1984        | 0.93<br>(0.86–1.01) |
| Hackney          | 1985        | 0.97<br>(0.89–1.05) |
| Hackney          | 1986        | 0.99<br>(0.92–1.08) |
| Hackney          | 1987        | 1.04<br>(0.96–1.12) |
| Hackney          | 1988        | 1.06<br>(0.98–1.14) |
| Hackney          | 1989        | 1.04<br>(0.95–1.13) |

**Table 15 Ratio of adjusted to unadjusted 5q0 values for scaled locations by year**

| <b>Geography</b>       | <b>Year</b> | <b>Ratio</b>        |
|------------------------|-------------|---------------------|
| Hackney                | 1990        | 1.02<br>(0.94–1.1)  |
| Hackney                | 1991        | 0.99<br>(0.9–1.08)  |
| Hackney                | 1992        | 0.95<br>(0.86–1.03) |
| Hackney                | 1993        | 0.95<br>(0.86–1.04) |
| Hackney                | 1994        | 0.96<br>(0.88–1.05) |
| Hackney                | 1995        | 0.97<br>(0.88–1.07) |
| Hackney                | 1996        | 1.01<br>(0.91–1.12) |
| Hackney                | 1997        | 0.99<br>(0.9–1.08)  |
| Hackney                | 1998        | 1.01<br>(0.92–1.1)  |
| Hackney                | 1999        | 1.05<br>(0.96–1.14) |
| Hackney                | 2000        | 1.03<br>(0.93–1.15) |
| Hackney                | 2001        | 1.05<br>(0.96–1.16) |
| Hackney                | 2002        | 1.03<br>(0.94–1.13) |
| Hackney                | 2003        | 1.06<br>(0.96–1.17) |
| Hackney                | 2004        | 1.02<br>(0.92–1.12) |
| Hackney                | 2005        | 1.02<br>(0.92–1.14) |
| Hackney                | 2006        | 1.05<br>(0.94–1.16) |
| Hackney                | 2007        | 1.03<br>(0.94–1.15) |
| Hackney                | 2008        | 1.03<br>(0.93–1.13) |
| Hackney                | 2009        | 1.04<br>(0.94–1.15) |
| Hackney                | 2010        | 1.05<br>(0.96–1.15) |
| Hackney                | 2011        | 1.03<br>(0.93–1.13) |
| Hackney                | 2012        | 0.99<br>(0.89–1.1)  |
| Hackney                | 2013        | 0.94<br>(0.84–1.05) |
| Hackney                | 2014        | 0.9<br>(0.8–1.02)   |
| Hackney                | 2015        | 0.91<br>(0.8–1.03)  |
| Hackney                | 2016        | 0.91<br>(0.8–1.02)  |
| Hackney                | 2017        | 0.95<br>(0.79–1.12) |
| Hammersmith and Fulham | 1950        | 0.57<br>(0.47–0.67) |
| Hammersmith and Fulham | 1951        | 0.66<br>(0.54–0.79) |
| Hammersmith and Fulham | 1952        | 0.62<br>(0.51–0.74) |

**Table 15 Ratio of adjusted to unadjusted 5q0 values for scaled locations by year**

| <b>Geography</b>       | <b>Year</b> | <b>Ratio</b>        |
|------------------------|-------------|---------------------|
| Hammersmith and Fulham | 1953        | 0.63<br>(0.52–0.75) |
| Hammersmith and Fulham | 1954        | 0.6<br>(0.5–0.71)   |
| Hammersmith and Fulham | 1955        | 0.6<br>(0.51–0.71)  |
| Hammersmith and Fulham | 1956        | 0.6<br>(0.5–0.7)    |
| Hammersmith and Fulham | 1957        | 0.61<br>(0.51–0.72) |
| Hammersmith and Fulham | 1958        | 0.6<br>(0.51–0.72)  |
| Hammersmith and Fulham | 1959        | 0.61<br>(0.51–0.73) |
| Hammersmith and Fulham | 1960        | 0.63<br>(0.52–0.74) |
| Hammersmith and Fulham | 1961        | 0.64<br>(0.53–0.77) |
| Hammersmith and Fulham | 1962        | 0.67<br>(0.55–0.8)  |
| Hammersmith and Fulham | 1963        | 0.68<br>(0.56–0.81) |
| Hammersmith and Fulham | 1964        | 0.67<br>(0.55–0.8)  |
| Hammersmith and Fulham | 1965        | 0.66<br>(0.54–0.79) |
| Hammersmith and Fulham | 1966        | 0.69<br>(0.56–0.82) |
| Hammersmith and Fulham | 1967        | 0.68<br>(0.56–0.82) |
| Hammersmith and Fulham | 1968        | 0.72<br>(0.59–0.86) |
| Hammersmith and Fulham | 1969        | 0.74<br>(0.6–0.89)  |
| Hammersmith and Fulham | 1970        | 0.78<br>(0.63–0.93) |
| Hammersmith and Fulham | 1971        | 0.81<br>(0.67–0.97) |
| Hammersmith and Fulham | 1972        | 0.83<br>(0.68–0.98) |
| Hammersmith and Fulham | 1973        | 0.84<br>(0.71–0.98) |
| Hammersmith and Fulham | 1974        | 0.86<br>(0.74–1.01) |
| Hammersmith and Fulham | 1975        | 0.88<br>(0.75–1.02) |
| Hammersmith and Fulham | 1976        | 0.86<br>(0.73–1.0)  |
| Hammersmith and Fulham | 1977        | 0.89<br>(0.77–1.02) |
| Hammersmith and Fulham | 1978        | 0.95<br>(0.83–1.08) |
| Hammersmith and Fulham | 1979        | 0.98<br>(0.87–1.11) |
| Hammersmith and Fulham | 1980        | 0.97<br>(0.88–1.08) |
| Hammersmith and Fulham | 1981        | 0.94<br>(0.85–1.03) |
| Hammersmith and Fulham | 1982        | 0.95<br>(0.87–1.04) |
| Hammersmith and Fulham | 1983        | 0.93<br>(0.85–1.02) |

**Table 15 Ratio of adjusted to unadjusted 5q0 values for scaled locations by year**

| <b>Geography</b>       | <b>Year</b> | <b>Ratio</b>        |
|------------------------|-------------|---------------------|
| Hammersmith and Fulham | 1984        | 0.93<br>(0.86–1.01) |
| Hammersmith and Fulham | 1985        | 0.97<br>(0.89–1.05) |
| Hammersmith and Fulham | 1986        | 0.99<br>(0.92–1.08) |
| Hammersmith and Fulham | 1987        | 1.04<br>(0.96–1.12) |
| Hammersmith and Fulham | 1988        | 1.06<br>(0.98–1.14) |
| Hammersmith and Fulham | 1989        | 1.04<br>(0.95–1.13) |
| Hammersmith and Fulham | 1990        | 1.02<br>(0.94–1.1)  |
| Hammersmith and Fulham | 1991        | 0.99<br>(0.9–1.08)  |
| Hammersmith and Fulham | 1992        | 0.95<br>(0.86–1.03) |
| Hammersmith and Fulham | 1993        | 0.95<br>(0.86–1.04) |
| Hammersmith and Fulham | 1994        | 0.96<br>(0.88–1.05) |
| Hammersmith and Fulham | 1995        | 0.97<br>(0.88–1.07) |
| Hammersmith and Fulham | 1996        | 1.01<br>(0.91–1.12) |
| Hammersmith and Fulham | 1997        | 0.99<br>(0.9–1.08)  |
| Hammersmith and Fulham | 1998        | 1.01<br>(0.92–1.1)  |
| Hammersmith and Fulham | 1999        | 1.05<br>(0.96–1.14) |
| Hammersmith and Fulham | 2000        | 1.03<br>(0.93–1.15) |
| Hammersmith and Fulham | 2001        | 1.05<br>(0.96–1.16) |
| Hammersmith and Fulham | 2002        | 1.03<br>(0.94–1.13) |
| Hammersmith and Fulham | 2003        | 1.06<br>(0.96–1.17) |
| Hammersmith and Fulham | 2004        | 1.02<br>(0.92–1.12) |
| Hammersmith and Fulham | 2005        | 1.02<br>(0.92–1.14) |
| Hammersmith and Fulham | 2006        | 1.05<br>(0.94–1.16) |
| Hammersmith and Fulham | 2007        | 1.03<br>(0.94–1.15) |
| Hammersmith and Fulham | 2008        | 1.03<br>(0.93–1.13) |
| Hammersmith and Fulham | 2009        | 1.04<br>(0.94–1.15) |
| Hammersmith and Fulham | 2010        | 1.05<br>(0.96–1.15) |
| Hammersmith and Fulham | 2011        | 1.03<br>(0.93–1.14) |
| Hammersmith and Fulham | 2012        | 0.99<br>(0.89–1.1)  |
| Hammersmith and Fulham | 2013        | 0.94<br>(0.84–1.05) |
| Hammersmith and Fulham | 2014        | 0.9<br>(0.8–1.02)   |

**Table 15 Ratio of adjusted to unadjusted 5q0 values for scaled locations by year**

| <b>Geography</b>       | <b>Year</b> | <b>Ratio</b>        |
|------------------------|-------------|---------------------|
| Hammersmith and Fulham | 2015        | 0.91<br>(0.8–1.03)  |
| Hammersmith and Fulham | 2016        | 0.91<br>(0.8–1.02)  |
| Hammersmith and Fulham | 2017        | 0.95<br>(0.79–1.12) |
| Haringey               | 1950        | 0.57<br>(0.47–0.68) |
| Haringey               | 1951        | 0.66<br>(0.54–0.79) |
| Haringey               | 1952        | 0.62<br>(0.52–0.74) |
| Haringey               | 1953        | 0.63<br>(0.52–0.75) |
| Haringey               | 1954        | 0.6<br>(0.5–0.71)   |
| Haringey               | 1955        | 0.6<br>(0.51–0.71)  |
| Haringey               | 1956        | 0.6<br>(0.5–0.7)    |
| Haringey               | 1957        | 0.61<br>(0.51–0.72) |
| Haringey               | 1958        | 0.6<br>(0.51–0.72)  |
| Haringey               | 1959        | 0.61<br>(0.51–0.73) |
| Haringey               | 1960        | 0.63<br>(0.52–0.75) |
| Haringey               | 1961        | 0.64<br>(0.53–0.77) |
| Haringey               | 1962        | 0.67<br>(0.55–0.8)  |
| Haringey               | 1963        | 0.68<br>(0.56–0.81) |
| Haringey               | 1964        | 0.67<br>(0.55–0.8)  |
| Haringey               | 1965        | 0.66<br>(0.54–0.79) |
| Haringey               | 1966        | 0.69<br>(0.56–0.82) |
| Haringey               | 1967        | 0.68<br>(0.56–0.82) |
| Haringey               | 1968        | 0.72<br>(0.59–0.86) |
| Haringey               | 1969        | 0.74<br>(0.6–0.89)  |
| Haringey               | 1970        | 0.78<br>(0.63–0.93) |
| Haringey               | 1971        | 0.81<br>(0.67–0.97) |
| Haringey               | 1972        | 0.83<br>(0.68–0.98) |
| Haringey               | 1973        | 0.84<br>(0.71–0.98) |
| Haringey               | 1974        | 0.86<br>(0.74–1.01) |
| Haringey               | 1975        | 0.88<br>(0.75–1.02) |
| Haringey               | 1976        | 0.86<br>(0.74–1.0)  |
| Haringey               | 1977        | 0.89<br>(0.77–1.02) |

**Table 15 Ratio of adjusted to unadjusted 5q0 values for scaled locations by year**

| <b>Geography</b> | <b>Year</b> | <b>Ratio</b>        |
|------------------|-------------|---------------------|
| Haringey         | 1978        | 0.95<br>(0.83–1.08) |
| Haringey         | 1979        | 0.98<br>(0.87–1.11) |
| Haringey         | 1980        | 0.97<br>(0.88–1.08) |
| Haringey         | 1981        | 0.94<br>(0.85–1.03) |
| Haringey         | 1982        | 0.95<br>(0.87–1.04) |
| Haringey         | 1983        | 0.93<br>(0.85–1.02) |
| Haringey         | 1984        | 0.93<br>(0.86–1.01) |
| Haringey         | 1985        | 0.97<br>(0.89–1.05) |
| Haringey         | 1986        | 0.99<br>(0.92–1.08) |
| Haringey         | 1987        | 1.04<br>(0.96–1.12) |
| Haringey         | 1988        | 1.06<br>(0.98–1.14) |
| Haringey         | 1989        | 1.04<br>(0.95–1.13) |
| Haringey         | 1990        | 1.02<br>(0.94–1.1)  |
| Haringey         | 1991        | 0.99<br>(0.9–1.08)  |
| Haringey         | 1992        | 0.95<br>(0.86–1.03) |
| Haringey         | 1993        | 0.95<br>(0.86–1.04) |
| Haringey         | 1994        | 0.96<br>(0.88–1.05) |
| Haringey         | 1995        | 0.97<br>(0.88–1.07) |
| Haringey         | 1996        | 1.01<br>(0.91–1.12) |
| Haringey         | 1997        | 0.99<br>(0.9–1.08)  |
| Haringey         | 1998        | 1.01<br>(0.92–1.1)  |
| Haringey         | 1999        | 1.05<br>(0.96–1.14) |
| Haringey         | 2000        | 1.03<br>(0.93–1.15) |
| Haringey         | 2001        | 1.05<br>(0.96–1.16) |
| Haringey         | 2002        | 1.03<br>(0.94–1.13) |
| Haringey         | 2003        | 1.06<br>(0.96–1.17) |
| Haringey         | 2004        | 1.02<br>(0.92–1.12) |
| Haringey         | 2005        | 1.02<br>(0.92–1.14) |
| Haringey         | 2006        | 1.05<br>(0.94–1.16) |
| Haringey         | 2007        | 1.03<br>(0.94–1.15) |
| Haringey         | 2008        | 1.03<br>(0.93–1.13) |

**Table 15 Ratio of adjusted to unadjusted 5q0 values for scaled locations by year**

| <b>Geography</b> | <b>Year</b> | <b>Ratio</b>        |
|------------------|-------------|---------------------|
| Haringey         | 2009        | 1.04<br>(0.94–1.15) |
| Haringey         | 2010        | 1.05<br>(0.96–1.15) |
| Haringey         | 2011        | 1.03<br>(0.93–1.14) |
| Haringey         | 2012        | 0.99<br>(0.89–1.1)  |
| Haringey         | 2013        | 0.94<br>(0.84–1.05) |
| Haringey         | 2014        | 0.9<br>(0.8–1.02)   |
| Haringey         | 2015        | 0.91<br>(0.8–1.03)  |
| Haringey         | 2016        | 0.91<br>(0.8–1.02)  |
| Haringey         | 2017        | 0.95<br>(0.79–1.12) |
| Harrow           | 1950        | 0.56<br>(0.47–0.67) |
| Harrow           | 1951        | 0.66<br>(0.54–0.79) |
| Harrow           | 1952        | 0.62<br>(0.51–0.74) |
| Harrow           | 1953        | 0.63<br>(0.52–0.75) |
| Harrow           | 1954        | 0.6<br>(0.49–0.71)  |
| Harrow           | 1955        | 0.6<br>(0.51–0.71)  |
| Harrow           | 1956        | 0.6<br>(0.5–0.7)    |
| Harrow           | 1957        | 0.61<br>(0.51–0.72) |
| Harrow           | 1958        | 0.6<br>(0.51–0.72)  |
| Harrow           | 1959        | 0.61<br>(0.51–0.73) |
| Harrow           | 1960        | 0.62<br>(0.52–0.74) |
| Harrow           | 1961        | 0.64<br>(0.53–0.76) |
| Harrow           | 1962        | 0.67<br>(0.55–0.8)  |
| Harrow           | 1963        | 0.68<br>(0.56–0.81) |
| Harrow           | 1964        | 0.67<br>(0.55–0.8)  |
| Harrow           | 1965        | 0.66<br>(0.54–0.79) |
| Harrow           | 1966        | 0.69<br>(0.56–0.82) |
| Harrow           | 1967        | 0.68<br>(0.55–0.82) |
| Harrow           | 1968        | 0.72<br>(0.59–0.86) |
| Harrow           | 1969        | 0.74<br>(0.6–0.89)  |
| Harrow           | 1970        | 0.78<br>(0.63–0.93) |
| Harrow           | 1971        | 0.81<br>(0.67–0.97) |



**Table 15 Ratio of adjusted to unadjusted 5q0 values for scaled locations by year**

| <b>Geography</b> | <b>Year</b> | <b>Ratio</b>        |
|------------------|-------------|---------------------|
| Harrow           | 1972        | 0.83<br>(0.68–0.98) |
| Harrow           | 1973        | 0.84<br>(0.71–0.98) |
| Harrow           | 1974        | 0.86<br>(0.73–1.01) |
| Harrow           | 1975        | 0.88<br>(0.75–1.02) |
| Harrow           | 1976        | 0.86<br>(0.73–1.0)  |
| Harrow           | 1977        | 0.89<br>(0.77–1.02) |
| Harrow           | 1978        | 0.95<br>(0.83–1.08) |
| Harrow           | 1979        | 0.98<br>(0.87–1.11) |
| Harrow           | 1980        | 0.97<br>(0.88–1.08) |
| Harrow           | 1981        | 0.94<br>(0.85–1.03) |
| Harrow           | 1982        | 0.95<br>(0.87–1.04) |
| Harrow           | 1983        | 0.93<br>(0.85–1.02) |
| Harrow           | 1984        | 0.93<br>(0.86–1.01) |
| Harrow           | 1985        | 0.97<br>(0.89–1.05) |
| Harrow           | 1986        | 0.99<br>(0.92–1.08) |
| Harrow           | 1987        | 1.04<br>(0.96–1.12) |
| Harrow           | 1988        | 1.06<br>(0.98–1.14) |
| Harrow           | 1989        | 1.04<br>(0.95–1.13) |
| Harrow           | 1990        | 1.02<br>(0.94–1.1)  |
| Harrow           | 1991        | 0.99<br>(0.9–1.08)  |
| Harrow           | 1992        | 0.95<br>(0.86–1.03) |
| Harrow           | 1993        | 0.95<br>(0.86–1.04) |
| Harrow           | 1994        | 0.96<br>(0.88–1.05) |
| Harrow           | 1995        | 0.97<br>(0.88–1.07) |
| Harrow           | 1996        | 1.01<br>(0.91–1.12) |
| Harrow           | 1997        | 0.99<br>(0.9–1.08)  |
| Harrow           | 1998        | 1.01<br>(0.92–1.1)  |
| Harrow           | 1999        | 1.05<br>(0.96–1.14) |
| Harrow           | 2000        | 1.03<br>(0.93–1.15) |
| Harrow           | 2001        | 1.05<br>(0.96–1.16) |
| Harrow           | 2002        | 1.03<br>(0.94–1.13) |

**Table 15 Ratio of adjusted to unadjusted 5q0 values for scaled locations by year**

| <b>Geography</b> | <b>Year</b> | <b>Ratio</b>        |
|------------------|-------------|---------------------|
| Harrow           | 2003        | 1.06<br>(0.96–1.17) |
| Harrow           | 2004        | 1.02<br>(0.92–1.12) |
| Harrow           | 2005        | 1.02<br>(0.92–1.14) |
| Harrow           | 2006        | 1.05<br>(0.94–1.16) |
| Harrow           | 2007        | 1.03<br>(0.94–1.15) |
| Harrow           | 2008        | 1.03<br>(0.93–1.13) |
| Harrow           | 2009        | 1.04<br>(0.94–1.15) |
| Harrow           | 2010        | 1.05<br>(0.96–1.15) |
| Harrow           | 2011        | 1.03<br>(0.93–1.13) |
| Harrow           | 2012        | 0.99<br>(0.89–1.1)  |
| Harrow           | 2013        | 0.94<br>(0.84–1.05) |
| Harrow           | 2014        | 0.9<br>(0.8–1.02)   |
| Harrow           | 2015        | 0.91<br>(0.8–1.03)  |
| Harrow           | 2016        | 0.91<br>(0.8–1.02)  |
| Harrow           | 2017        | 0.95<br>(0.79–1.12) |
| Havering         | 1950        | 0.56<br>(0.47–0.67) |
| Havering         | 1951        | 0.66<br>(0.54–0.79) |
| Havering         | 1952        | 0.62<br>(0.51–0.74) |
| Havering         | 1953        | 0.63<br>(0.52–0.75) |
| Havering         | 1954        | 0.6<br>(0.5–0.71)   |
| Havering         | 1955        | 0.6<br>(0.51–0.71)  |
| Havering         | 1956        | 0.6<br>(0.5–0.7)    |
| Havering         | 1957        | 0.61<br>(0.51–0.72) |
| Havering         | 1958        | 0.6<br>(0.51–0.72)  |
| Havering         | 1959        | 0.61<br>(0.51–0.73) |
| Havering         | 1960        | 0.63<br>(0.52–0.74) |
| Havering         | 1961        | 0.64<br>(0.53–0.77) |
| Havering         | 1962        | 0.67<br>(0.55–0.8)  |
| Havering         | 1963        | 0.68<br>(0.56–0.81) |
| Havering         | 1964        | 0.67<br>(0.55–0.8)  |
| Havering         | 1965        | 0.66<br>(0.54–0.79) |

**Table 15 Ratio of adjusted to unadjusted 5q0 values for scaled locations by year**

| <b>Geography</b> | <b>Year</b> | <b>Ratio</b>        |
|------------------|-------------|---------------------|
| Havering         | 1966        | 0.69<br>(0.56–0.82) |
| Havering         | 1967        | 0.68<br>(0.55–0.82) |
| Havering         | 1968        | 0.72<br>(0.59–0.86) |
| Havering         | 1969        | 0.74<br>(0.6–0.89)  |
| Havering         | 1970        | 0.78<br>(0.63–0.93) |
| Havering         | 1971        | 0.81<br>(0.67–0.97) |
| Havering         | 1972        | 0.83<br>(0.68–0.98) |
| Havering         | 1973        | 0.84<br>(0.71–0.98) |
| Havering         | 1974        | 0.86<br>(0.73–1.01) |
| Havering         | 1975        | 0.88<br>(0.75–1.02) |
| Havering         | 1976        | 0.86<br>(0.73–1.0)  |
| Havering         | 1977        | 0.89<br>(0.77–1.02) |
| Havering         | 1978        | 0.95<br>(0.83–1.08) |
| Havering         | 1979        | 0.98<br>(0.87–1.11) |
| Havering         | 1980        | 0.97<br>(0.88–1.08) |
| Havering         | 1981        | 0.94<br>(0.85–1.03) |
| Havering         | 1982        | 0.95<br>(0.87–1.04) |
| Havering         | 1983        | 0.93<br>(0.85–1.02) |
| Havering         | 1984        | 0.93<br>(0.86–1.01) |
| Havering         | 1985        | 0.97<br>(0.89–1.05) |
| Havering         | 1986        | 0.99<br>(0.92–1.08) |
| Havering         | 1987        | 1.04<br>(0.96–1.12) |
| Havering         | 1988        | 1.06<br>(0.98–1.14) |
| Havering         | 1989        | 1.04<br>(0.95–1.13) |
| Havering         | 1990        | 1.02<br>(0.94–1.1)  |
| Havering         | 1991        | 0.99<br>(0.9–1.08)  |
| Havering         | 1992        | 0.95<br>(0.86–1.03) |
| Havering         | 1993        | 0.95<br>(0.86–1.04) |
| Havering         | 1994        | 0.96<br>(0.88–1.05) |
| Havering         | 1995        | 0.97<br>(0.88–1.07) |
| Havering         | 1996        | 1.01<br>(0.91–1.12) |

**Table 15 Ratio of adjusted to unadjusted 5q0 values for scaled locations by year**

| <b>Geography</b> | <b>Year</b> | <b>Ratio</b>        |
|------------------|-------------|---------------------|
| Havering         | 1997        | 0.99<br>(0.9–1.08)  |
| Havering         | 1998        | 1.01<br>(0.92–1.1)  |
| Havering         | 1999        | 1.05<br>(0.96–1.14) |
| Havering         | 2000        | 1.03<br>(0.93–1.15) |
| Havering         | 2001        | 1.05<br>(0.96–1.16) |
| Havering         | 2002        | 1.03<br>(0.94–1.13) |
| Havering         | 2003        | 1.06<br>(0.96–1.17) |
| Havering         | 2004        | 1.02<br>(0.92–1.12) |
| Havering         | 2005        | 1.02<br>(0.92–1.14) |
| Havering         | 2006        | 1.05<br>(0.94–1.16) |
| Havering         | 2007        | 1.03<br>(0.94–1.15) |
| Havering         | 2008        | 1.03<br>(0.93–1.13) |
| Havering         | 2009        | 1.04<br>(0.94–1.15) |
| Havering         | 2010        | 1.05<br>(0.96–1.15) |
| Havering         | 2011        | 1.03<br>(0.93–1.14) |
| Havering         | 2012        | 0.99<br>(0.89–1.1)  |
| Havering         | 2013        | 0.94<br>(0.84–1.05) |
| Havering         | 2014        | 0.9<br>(0.8–1.02)   |
| Havering         | 2015        | 0.91<br>(0.8–1.03)  |
| Havering         | 2016        | 0.91<br>(0.8–1.02)  |
| Havering         | 2017        | 0.95<br>(0.79–1.12) |
| Hillingdon       | 1950        | 0.56<br>(0.47–0.67) |
| Hillingdon       | 1951        | 0.66<br>(0.54–0.79) |
| Hillingdon       | 1952        | 0.62<br>(0.51–0.74) |
| Hillingdon       | 1953        | 0.63<br>(0.52–0.75) |
| Hillingdon       | 1954        | 0.6<br>(0.5–0.71)   |
| Hillingdon       | 1955        | 0.6<br>(0.51–0.71)  |
| Hillingdon       | 1956        | 0.6<br>(0.5–0.7)    |
| Hillingdon       | 1957        | 0.61<br>(0.51–0.72) |
| Hillingdon       | 1958        | 0.6<br>(0.51–0.72)  |
| Hillingdon       | 1959        | 0.61<br>(0.51–0.73) |

**Table 15 Ratio of adjusted to unadjusted 5q0 values for scaled locations by year**

| <b>Geography</b> | <b>Year</b> | <b>Ratio</b>        |
|------------------|-------------|---------------------|
| Hillingdon       | 1960        | 0.63<br>(0.52–0.74) |
| Hillingdon       | 1961        | 0.64<br>(0.53–0.77) |
| Hillingdon       | 1962        | 0.67<br>(0.55–0.8)  |
| Hillingdon       | 1963        | 0.68<br>(0.56–0.81) |
| Hillingdon       | 1964        | 0.67<br>(0.55–0.8)  |
| Hillingdon       | 1965        | 0.66<br>(0.54–0.79) |
| Hillingdon       | 1966        | 0.69<br>(0.56–0.82) |
| Hillingdon       | 1967        | 0.68<br>(0.55–0.82) |
| Hillingdon       | 1968        | 0.72<br>(0.59–0.86) |
| Hillingdon       | 1969        | 0.74<br>(0.6–0.89)  |
| Hillingdon       | 1970        | 0.78<br>(0.63–0.93) |
| Hillingdon       | 1971        | 0.81<br>(0.67–0.97) |
| Hillingdon       | 1972        | 0.83<br>(0.68–0.98) |
| Hillingdon       | 1973        | 0.84<br>(0.71–0.98) |
| Hillingdon       | 1974        | 0.86<br>(0.74–1.01) |
| Hillingdon       | 1975        | 0.88<br>(0.75–1.02) |
| Hillingdon       | 1976        | 0.86<br>(0.73–1.0)  |
| Hillingdon       | 1977        | 0.89<br>(0.77–1.02) |
| Hillingdon       | 1978        | 0.95<br>(0.83–1.08) |
| Hillingdon       | 1979        | 0.98<br>(0.87–1.11) |
| Hillingdon       | 1980        | 0.97<br>(0.88–1.08) |
| Hillingdon       | 1981        | 0.94<br>(0.85–1.03) |
| Hillingdon       | 1982        | 0.95<br>(0.87–1.04) |
| Hillingdon       | 1983        | 0.93<br>(0.85–1.02) |
| Hillingdon       | 1984        | 0.93<br>(0.86–1.01) |
| Hillingdon       | 1985        | 0.97<br>(0.89–1.05) |
| Hillingdon       | 1986        | 0.99<br>(0.92–1.08) |
| Hillingdon       | 1987        | 1.04<br>(0.96–1.12) |
| Hillingdon       | 1988        | 1.06<br>(0.98–1.14) |
| Hillingdon       | 1989        | 1.04<br>(0.95–1.13) |
| Hillingdon       | 1990        | 1.02<br>(0.94–1.1)  |

**Table 15 Ratio of adjusted to unadjusted 5q0 values for scaled locations by year**

| <b>Geography</b> | <b>Year</b> | <b>Ratio</b>        |
|------------------|-------------|---------------------|
| Hillingdon       | 1991        | 0.99<br>(0.9–1.08)  |
| Hillingdon       | 1992        | 0.95<br>(0.86–1.03) |
| Hillingdon       | 1993        | 0.95<br>(0.86–1.04) |
| Hillingdon       | 1994        | 0.96<br>(0.88–1.05) |
| Hillingdon       | 1995        | 0.97<br>(0.88–1.07) |
| Hillingdon       | 1996        | 1.01<br>(0.91–1.12) |
| Hillingdon       | 1997        | 0.99<br>(0.9–1.08)  |
| Hillingdon       | 1998        | 1.01<br>(0.92–1.1)  |
| Hillingdon       | 1999        | 1.05<br>(0.96–1.14) |
| Hillingdon       | 2000        | 1.03<br>(0.93–1.15) |
| Hillingdon       | 2001        | 1.05<br>(0.96–1.16) |
| Hillingdon       | 2002        | 1.03<br>(0.94–1.13) |
| Hillingdon       | 2003        | 1.06<br>(0.96–1.17) |
| Hillingdon       | 2004        | 1.02<br>(0.92–1.12) |
| Hillingdon       | 2005        | 1.02<br>(0.92–1.14) |
| Hillingdon       | 2006        | 1.05<br>(0.94–1.16) |
| Hillingdon       | 2007        | 1.03<br>(0.94–1.15) |
| Hillingdon       | 2008        | 1.03<br>(0.93–1.13) |
| Hillingdon       | 2009        | 1.04<br>(0.94–1.15) |
| Hillingdon       | 2010        | 1.05<br>(0.96–1.15) |
| Hillingdon       | 2011        | 1.03<br>(0.93–1.14) |
| Hillingdon       | 2012        | 0.99<br>(0.89–1.1)  |
| Hillingdon       | 2013        | 0.94<br>(0.84–1.05) |
| Hillingdon       | 2014        | 0.9<br>(0.8–1.02)   |
| Hillingdon       | 2015        | 0.91<br>(0.8–1.03)  |
| Hillingdon       | 2016        | 0.91<br>(0.8–1.02)  |
| Hillingdon       | 2017        | 0.95<br>(0.79–1.12) |
| Hounslow         | 1950        | 0.57<br>(0.47–0.67) |
| Hounslow         | 1951        | 0.66<br>(0.54–0.79) |
| Hounslow         | 1952        | 0.62<br>(0.51–0.74) |
| Hounslow         | 1953        | 0.63<br>(0.52–0.75) |

**Table 15 Ratio of adjusted to unadjusted 5q0 values for scaled locations by year**

| <b>Geography</b> | <b>Year</b> | <b>Ratio</b>        |
|------------------|-------------|---------------------|
| Hounslow         | 1954        | 0.6<br>(0.5–0.71)   |
| Hounslow         | 1955        | 0.6<br>(0.51–0.71)  |
| Hounslow         | 1956        | 0.6<br>(0.5–0.7)    |
| Hounslow         | 1957        | 0.61<br>(0.51–0.72) |
| Hounslow         | 1958        | 0.6<br>(0.51–0.72)  |
| Hounslow         | 1959        | 0.61<br>(0.51–0.73) |
| Hounslow         | 1960        | 0.63<br>(0.52–0.74) |
| Hounslow         | 1961        | 0.64<br>(0.53–0.77) |
| Hounslow         | 1962        | 0.67<br>(0.55–0.8)  |
| Hounslow         | 1963        | 0.68<br>(0.56–0.81) |
| Hounslow         | 1964        | 0.67<br>(0.55–0.8)  |
| Hounslow         | 1965        | 0.66<br>(0.54–0.79) |
| Hounslow         | 1966        | 0.69<br>(0.56–0.82) |
| Hounslow         | 1967        | 0.68<br>(0.56–0.82) |
| Hounslow         | 1968        | 0.72<br>(0.59–0.86) |
| Hounslow         | 1969        | 0.74<br>(0.6–0.89)  |
| Hounslow         | 1970        | 0.78<br>(0.63–0.93) |
| Hounslow         | 1971        | 0.81<br>(0.67–0.97) |
| Hounslow         | 1972        | 0.83<br>(0.68–0.98) |
| Hounslow         | 1973        | 0.84<br>(0.71–0.98) |
| Hounslow         | 1974        | 0.86<br>(0.74–1.01) |
| Hounslow         | 1975        | 0.88<br>(0.75–1.02) |
| Hounslow         | 1976        | 0.86<br>(0.73–1.0)  |
| Hounslow         | 1977        | 0.89<br>(0.77–1.02) |
| Hounslow         | 1978        | 0.95<br>(0.83–1.08) |
| Hounslow         | 1979        | 0.98<br>(0.87–1.11) |
| Hounslow         | 1980        | 0.97<br>(0.88–1.08) |
| Hounslow         | 1981        | 0.94<br>(0.85–1.03) |
| Hounslow         | 1982        | 0.95<br>(0.87–1.04) |
| Hounslow         | 1983        | 0.93<br>(0.85–1.02) |
| Hounslow         | 1984        | 0.93<br>(0.86–1.01) |

**Table 15 Ratio of adjusted to unadjusted 5q0 values for scaled locations by year**

| <b>Geography</b> | <b>Year</b> | <b>Ratio</b>        |
|------------------|-------------|---------------------|
| Hounslow         | 1985        | 0.97<br>(0.89–1.05) |
| Hounslow         | 1986        | 0.99<br>(0.92–1.08) |
| Hounslow         | 1987        | 1.04<br>(0.96–1.12) |
| Hounslow         | 1988        | 1.06<br>(0.98–1.14) |
| Hounslow         | 1989        | 1.04<br>(0.95–1.13) |
| Hounslow         | 1990        | 1.02<br>(0.94–1.1)  |
| Hounslow         | 1991        | 0.99<br>(0.9–1.08)  |
| Hounslow         | 1992        | 0.95<br>(0.86–1.03) |
| Hounslow         | 1993        | 0.95<br>(0.86–1.04) |
| Hounslow         | 1994        | 0.96<br>(0.88–1.05) |
| Hounslow         | 1995        | 0.97<br>(0.88–1.07) |
| Hounslow         | 1996        | 1.01<br>(0.91–1.12) |
| Hounslow         | 1997        | 0.99<br>(0.9–1.08)  |
| Hounslow         | 1998        | 1.01<br>(0.92–1.1)  |
| Hounslow         | 1999        | 1.05<br>(0.96–1.14) |
| Hounslow         | 2000        | 1.03<br>(0.93–1.15) |
| Hounslow         | 2001        | 1.05<br>(0.96–1.16) |
| Hounslow         | 2002        | 1.03<br>(0.94–1.13) |
| Hounslow         | 2003        | 1.06<br>(0.96–1.17) |
| Hounslow         | 2004        | 1.02<br>(0.92–1.12) |
| Hounslow         | 2005        | 1.02<br>(0.92–1.14) |
| Hounslow         | 2006        | 1.05<br>(0.94–1.16) |
| Hounslow         | 2007        | 1.03<br>(0.94–1.15) |
| Hounslow         | 2008        | 1.03<br>(0.93–1.13) |
| Hounslow         | 2009        | 1.04<br>(0.94–1.15) |
| Hounslow         | 2010        | 1.05<br>(0.96–1.15) |
| Hounslow         | 2011        | 1.03<br>(0.93–1.14) |
| Hounslow         | 2012        | 0.99<br>(0.89–1.1)  |
| Hounslow         | 2013        | 0.94<br>(0.84–1.05) |
| Hounslow         | 2014        | 0.9<br>(0.8–1.02)   |
| Hounslow         | 2015        | 0.91<br>(0.8–1.03)  |



**Table 15 Ratio of adjusted to unadjusted 5q0 values for scaled locations by year**

| <b>Geography</b> | <b>Year</b> | <b>Ratio</b>        |
|------------------|-------------|---------------------|
| Hounslow         | 2016        | 0.91<br>(0.8–1.02)  |
| Hounslow         | 2017        | 0.95<br>(0.79–1.12) |
| Islington        | 1950        | 0.57<br>(0.47–0.68) |
| Islington        | 1951        | 0.66<br>(0.54–0.79) |
| Islington        | 1952        | 0.62<br>(0.52–0.74) |
| Islington        | 1953        | 0.63<br>(0.52–0.75) |
| Islington        | 1954        | 0.6<br>(0.5–0.71)   |
| Islington        | 1955        | 0.6<br>(0.51–0.71)  |
| Islington        | 1956        | 0.6<br>(0.5–0.7)    |
| Islington        | 1957        | 0.61<br>(0.51–0.72) |
| Islington        | 1958        | 0.6<br>(0.51–0.72)  |
| Islington        | 1959        | 0.61<br>(0.51–0.73) |
| Islington        | 1960        | 0.63<br>(0.52–0.75) |
| Islington        | 1961        | 0.64<br>(0.53–0.77) |
| Islington        | 1962        | 0.67<br>(0.55–0.8)  |
| Islington        | 1963        | 0.68<br>(0.57–0.81) |
| Islington        | 1964        | 0.67<br>(0.55–0.8)  |
| Islington        | 1965        | 0.66<br>(0.54–0.79) |
| Islington        | 1966        | 0.69<br>(0.56–0.82) |
| Islington        | 1967        | 0.68<br>(0.56–0.82) |
| Islington        | 1968        | 0.72<br>(0.59–0.86) |
| Islington        | 1969        | 0.74<br>(0.6–0.89)  |
| Islington        | 1970        | 0.78<br>(0.63–0.94) |
| Islington        | 1971        | 0.81<br>(0.67–0.97) |
| Islington        | 1972        | 0.83<br>(0.68–0.98) |
| Islington        | 1973        | 0.84<br>(0.71–0.98) |
| Islington        | 1974        | 0.86<br>(0.74–1.01) |
| Islington        | 1975        | 0.88<br>(0.75–1.02) |
| Islington        | 1976        | 0.86<br>(0.74–1.0)  |
| Islington        | 1977        | 0.89<br>(0.77–1.02) |
| Islington        | 1978        | 0.95<br>(0.83–1.08) |

**Table 15 Ratio of adjusted to unadjusted 5q0 values for scaled locations by year**

| <b>Geography</b> | <b>Year</b> | <b>Ratio</b>        |
|------------------|-------------|---------------------|
| Islington        | 1979        | 0.98<br>(0.87–1.11) |
| Islington        | 1980        | 0.97<br>(0.88–1.07) |
| Islington        | 1981        | 0.94<br>(0.85–1.03) |
| Islington        | 1982        | 0.95<br>(0.87–1.04) |
| Islington        | 1983        | 0.93<br>(0.85–1.02) |
| Islington        | 1984        | 0.93<br>(0.86–1.01) |
| Islington        | 1985        | 0.97<br>(0.89–1.05) |
| Islington        | 1986        | 0.99<br>(0.92–1.08) |
| Islington        | 1987        | 1.04<br>(0.96–1.12) |
| Islington        | 1988        | 1.06<br>(0.98–1.14) |
| Islington        | 1989        | 1.04<br>(0.95–1.13) |
| Islington        | 1990        | 1.02<br>(0.94–1.1)  |
| Islington        | 1991        | 0.99<br>(0.9–1.08)  |
| Islington        | 1992        | 0.95<br>(0.86–1.03) |
| Islington        | 1993        | 0.95<br>(0.86–1.04) |
| Islington        | 1994        | 0.96<br>(0.88–1.05) |
| Islington        | 1995        | 0.97<br>(0.88–1.07) |
| Islington        | 1996        | 1.01<br>(0.91–1.12) |
| Islington        | 1997        | 0.99<br>(0.9–1.08)  |
| Islington        | 1998        | 1.01<br>(0.92–1.1)  |
| Islington        | 1999        | 1.05<br>(0.96–1.14) |
| Islington        | 2000        | 1.03<br>(0.93–1.15) |
| Islington        | 2001        | 1.05<br>(0.96–1.16) |
| Islington        | 2002        | 1.03<br>(0.94–1.13) |
| Islington        | 2003        | 1.06<br>(0.96–1.17) |
| Islington        | 2004        | 1.02<br>(0.92–1.12) |
| Islington        | 2005        | 1.02<br>(0.92–1.14) |
| Islington        | 2006        | 1.05<br>(0.94–1.16) |
| Islington        | 2007        | 1.03<br>(0.94–1.15) |
| Islington        | 2008        | 1.03<br>(0.93–1.13) |
| Islington        | 2009        | 1.04<br>(0.94–1.15) |

**Table 15 Ratio of adjusted to unadjusted 5q0 values for scaled locations by year**

| <b>Geography</b>       | <b>Year</b> | <b>Ratio</b>        |
|------------------------|-------------|---------------------|
| Islington              | 2010        | 1.05<br>(0.96–1.15) |
| Islington              | 2011        | 1.03<br>(0.93–1.14) |
| Islington              | 2012        | 0.99<br>(0.89–1.1)  |
| Islington              | 2013        | 0.94<br>(0.84–1.05) |
| Islington              | 2014        | 0.9<br>(0.8–1.02)   |
| Islington              | 2015        | 0.91<br>(0.8–1.03)  |
| Islington              | 2016        | 0.91<br>(0.8–1.02)  |
| Islington              | 2017        | 0.95<br>(0.79–1.12) |
| Kensington and Chelsea | 1950        | 0.57<br>(0.47–0.68) |
| Kensington and Chelsea | 1951        | 0.66<br>(0.54–0.79) |
| Kensington and Chelsea | 1952        | 0.62<br>(0.52–0.74) |
| Kensington and Chelsea | 1953        | 0.63<br>(0.52–0.75) |
| Kensington and Chelsea | 1954        | 0.6<br>(0.5–0.71)   |
| Kensington and Chelsea | 1955        | 0.6<br>(0.51–0.71)  |
| Kensington and Chelsea | 1956        | 0.6<br>(0.5–0.7)    |
| Kensington and Chelsea | 1957        | 0.61<br>(0.51–0.72) |
| Kensington and Chelsea | 1958        | 0.6<br>(0.51–0.72)  |
| Kensington and Chelsea | 1959        | 0.61<br>(0.51–0.73) |
| Kensington and Chelsea | 1960        | 0.63<br>(0.52–0.74) |
| Kensington and Chelsea | 1961        | 0.64<br>(0.53–0.77) |
| Kensington and Chelsea | 1962        | 0.67<br>(0.55–0.8)  |
| Kensington and Chelsea | 1963        | 0.68<br>(0.56–0.81) |
| Kensington and Chelsea | 1964        | 0.67<br>(0.55–0.8)  |
| Kensington and Chelsea | 1965        | 0.66<br>(0.54–0.79) |
| Kensington and Chelsea | 1966        | 0.69<br>(0.56–0.82) |
| Kensington and Chelsea | 1967        | 0.68<br>(0.56–0.82) |
| Kensington and Chelsea | 1968        | 0.72<br>(0.59–0.86) |
| Kensington and Chelsea | 1969        | 0.74<br>(0.6–0.89)  |
| Kensington and Chelsea | 1970        | 0.78<br>(0.63–0.93) |
| Kensington and Chelsea | 1971        | 0.81<br>(0.67–0.97) |
| Kensington and Chelsea | 1972        | 0.83<br>(0.68–0.98) |

**Table 15 Ratio of adjusted to unadjusted 5q0 values for scaled locations by year**

| <b>Geography</b>       | <b>Year</b> | <b>Ratio</b>        |
|------------------------|-------------|---------------------|
| Kensington and Chelsea | 1973        | 0.84<br>(0.71–0.98) |
| Kensington and Chelsea | 1974        | 0.86<br>(0.74–1.01) |
| Kensington and Chelsea | 1975        | 0.88<br>(0.75–1.02) |
| Kensington and Chelsea | 1976        | 0.86<br>(0.74–1.0)  |
| Kensington and Chelsea | 1977        | 0.89<br>(0.77–1.02) |
| Kensington and Chelsea | 1978        | 0.95<br>(0.83–1.08) |
| Kensington and Chelsea | 1979        | 0.98<br>(0.87–1.11) |
| Kensington and Chelsea | 1980        | 0.97<br>(0.88–1.08) |
| Kensington and Chelsea | 1981        | 0.94<br>(0.85–1.03) |
| Kensington and Chelsea | 1982        | 0.95<br>(0.87–1.04) |
| Kensington and Chelsea | 1983        | 0.93<br>(0.85–1.02) |
| Kensington and Chelsea | 1984        | 0.93<br>(0.86–1.01) |
| Kensington and Chelsea | 1985        | 0.97<br>(0.89–1.05) |
| Kensington and Chelsea | 1986        | 0.99<br>(0.92–1.08) |
| Kensington and Chelsea | 1987        | 1.04<br>(0.96–1.12) |
| Kensington and Chelsea | 1988        | 1.06<br>(0.98–1.14) |
| Kensington and Chelsea | 1989        | 1.04<br>(0.95–1.13) |
| Kensington and Chelsea | 1990        | 1.02<br>(0.94–1.1)  |
| Kensington and Chelsea | 1991        | 0.99<br>(0.9–1.08)  |
| Kensington and Chelsea | 1992        | 0.95<br>(0.86–1.03) |
| Kensington and Chelsea | 1993        | 0.95<br>(0.86–1.04) |
| Kensington and Chelsea | 1994        | 0.96<br>(0.88–1.05) |
| Kensington and Chelsea | 1995        | 0.97<br>(0.88–1.07) |
| Kensington and Chelsea | 1996        | 1.01<br>(0.91–1.12) |
| Kensington and Chelsea | 1997        | 0.99<br>(0.9–1.08)  |
| Kensington and Chelsea | 1998        | 1.01<br>(0.92–1.1)  |
| Kensington and Chelsea | 1999        | 1.05<br>(0.96–1.14) |
| Kensington and Chelsea | 2000        | 1.03<br>(0.93–1.15) |
| Kensington and Chelsea | 2001        | 1.05<br>(0.96–1.16) |
| Kensington and Chelsea | 2002        | 1.03<br>(0.94–1.13) |
| Kensington and Chelsea | 2003        | 1.06<br>(0.96–1.17) |

**Table 15 Ratio of adjusted to unadjusted 5q0 values for scaled locations by year**

| <b>Geography</b>       | <b>Year</b> | <b>Ratio</b>        |
|------------------------|-------------|---------------------|
| Kensington and Chelsea | 2004        | 1.02<br>(0.92–1.12) |
| Kensington and Chelsea | 2005        | 1.02<br>(0.92–1.14) |
| Kensington and Chelsea | 2006        | 1.05<br>(0.94–1.16) |
| Kensington and Chelsea | 2007        | 1.03<br>(0.94–1.15) |
| Kensington and Chelsea | 2008        | 1.03<br>(0.93–1.13) |
| Kensington and Chelsea | 2009        | 1.04<br>(0.94–1.15) |
| Kensington and Chelsea | 2010        | 1.05<br>(0.96–1.15) |
| Kensington and Chelsea | 2011        | 1.03<br>(0.93–1.14) |
| Kensington and Chelsea | 2012        | 0.99<br>(0.89–1.1)  |
| Kensington and Chelsea | 2013        | 0.94<br>(0.84–1.05) |
| Kensington and Chelsea | 2014        | 0.9<br>(0.8–1.02)   |
| Kensington and Chelsea | 2015        | 0.91<br>(0.8–1.03)  |
| Kensington and Chelsea | 2016        | 0.91<br>(0.8–1.02)  |
| Kensington and Chelsea | 2017        | 0.95<br>(0.79–1.12) |
| Kingston upon Thames   | 1950        | 0.56<br>(0.47–0.67) |
| Kingston upon Thames   | 1951        | 0.66<br>(0.54–0.79) |
| Kingston upon Thames   | 1952        | 0.62<br>(0.51–0.74) |
| Kingston upon Thames   | 1953        | 0.63<br>(0.52–0.75) |
| Kingston upon Thames   | 1954        | 0.6<br>(0.49–0.71)  |
| Kingston upon Thames   | 1955        | 0.6<br>(0.51–0.71)  |
| Kingston upon Thames   | 1956        | 0.6<br>(0.5–0.7)    |
| Kingston upon Thames   | 1957        | 0.61<br>(0.51–0.72) |
| Kingston upon Thames   | 1958        | 0.6<br>(0.51–0.72)  |
| Kingston upon Thames   | 1959        | 0.61<br>(0.51–0.73) |
| Kingston upon Thames   | 1960        | 0.62<br>(0.52–0.74) |
| Kingston upon Thames   | 1961        | 0.64<br>(0.53–0.77) |
| Kingston upon Thames   | 1962        | 0.67<br>(0.55–0.8)  |
| Kingston upon Thames   | 1963        | 0.68<br>(0.56–0.81) |
| Kingston upon Thames   | 1964        | 0.67<br>(0.55–0.8)  |
| Kingston upon Thames   | 1965        | 0.66<br>(0.54–0.79) |
| Kingston upon Thames   | 1966        | 0.69<br>(0.56–0.82) |

**Table 15 Ratio of adjusted to unadjusted 5q0 values for scaled locations by year**

| <b>Geography</b>     | <b>Year</b> | <b>Ratio</b>        |
|----------------------|-------------|---------------------|
| Kingston upon Thames | 1967        | 0.68<br>(0.55–0.82) |
| Kingston upon Thames | 1968        | 0.72<br>(0.59–0.86) |
| Kingston upon Thames | 1969        | 0.74<br>(0.6–0.89)  |
| Kingston upon Thames | 1970        | 0.78<br>(0.63–0.93) |
| Kingston upon Thames | 1971        | 0.81<br>(0.67–0.97) |
| Kingston upon Thames | 1972        | 0.83<br>(0.68–0.98) |
| Kingston upon Thames | 1973        | 0.84<br>(0.71–0.98) |
| Kingston upon Thames | 1974        | 0.86<br>(0.73–1.01) |
| Kingston upon Thames | 1975        | 0.88<br>(0.75–1.02) |
| Kingston upon Thames | 1976        | 0.86<br>(0.73–1.0)  |
| Kingston upon Thames | 1977        | 0.89<br>(0.77–1.02) |
| Kingston upon Thames | 1978        | 0.95<br>(0.83–1.08) |
| Kingston upon Thames | 1979        | 0.98<br>(0.87–1.11) |
| Kingston upon Thames | 1980        | 0.97<br>(0.88–1.08) |
| Kingston upon Thames | 1981        | 0.94<br>(0.85–1.03) |
| Kingston upon Thames | 1982        | 0.95<br>(0.87–1.04) |
| Kingston upon Thames | 1983        | 0.93<br>(0.85–1.02) |
| Kingston upon Thames | 1984        | 0.93<br>(0.86–1.01) |
| Kingston upon Thames | 1985        | 0.97<br>(0.89–1.05) |
| Kingston upon Thames | 1986        | 0.99<br>(0.92–1.08) |
| Kingston upon Thames | 1987        | 1.04<br>(0.96–1.12) |
| Kingston upon Thames | 1988        | 1.06<br>(0.98–1.14) |
| Kingston upon Thames | 1989        | 1.04<br>(0.95–1.13) |
| Kingston upon Thames | 1990        | 1.02<br>(0.94–1.1)  |
| Kingston upon Thames | 1991        | 0.99<br>(0.9–1.08)  |
| Kingston upon Thames | 1992        | 0.95<br>(0.86–1.03) |
| Kingston upon Thames | 1993        | 0.95<br>(0.86–1.04) |
| Kingston upon Thames | 1994        | 0.96<br>(0.88–1.05) |
| Kingston upon Thames | 1995        | 0.97<br>(0.88–1.07) |
| Kingston upon Thames | 1996        | 1.01<br>(0.91–1.12) |
| Kingston upon Thames | 1997        | 0.99<br>(0.9–1.08)  |

**Table 15 Ratio of adjusted to unadjusted 5q0 values for scaled locations by year**

| <b>Geography</b>     | <b>Year</b> | <b>Ratio</b>        |
|----------------------|-------------|---------------------|
| Kingston upon Thames | 1998        | 1.01<br>(0.92–1.1)  |
| Kingston upon Thames | 1999        | 1.05<br>(0.96–1.14) |
| Kingston upon Thames | 2000        | 1.03<br>(0.93–1.15) |
| Kingston upon Thames | 2001        | 1.05<br>(0.96–1.16) |
| Kingston upon Thames | 2002        | 1.03<br>(0.94–1.13) |
| Kingston upon Thames | 2003        | 1.06<br>(0.96–1.17) |
| Kingston upon Thames | 2004        | 1.02<br>(0.92–1.12) |
| Kingston upon Thames | 2005        | 1.02<br>(0.92–1.14) |
| Kingston upon Thames | 2006        | 1.05<br>(0.94–1.16) |
| Kingston upon Thames | 2007        | 1.03<br>(0.94–1.15) |
| Kingston upon Thames | 2008        | 1.03<br>(0.93–1.13) |
| Kingston upon Thames | 2009        | 1.04<br>(0.94–1.15) |
| Kingston upon Thames | 2010        | 1.05<br>(0.96–1.15) |
| Kingston upon Thames | 2011        | 1.03<br>(0.93–1.14) |
| Kingston upon Thames | 2012        | 0.99<br>(0.89–1.1)  |
| Kingston upon Thames | 2013        | 0.94<br>(0.84–1.05) |
| Kingston upon Thames | 2014        | 0.9<br>(0.8–1.02)   |
| Kingston upon Thames | 2015        | 0.91<br>(0.8–1.03)  |
| Kingston upon Thames | 2016        | 0.91<br>(0.8–1.02)  |
| Kingston upon Thames | 2017        | 0.95<br>(0.79–1.12) |
| Lambeth              | 1950        | 0.57<br>(0.47–0.68) |
| Lambeth              | 1951        | 0.66<br>(0.55–0.79) |
| Lambeth              | 1952        | 0.62<br>(0.52–0.74) |
| Lambeth              | 1953        | 0.63<br>(0.52–0.75) |
| Lambeth              | 1954        | 0.6<br>(0.5–0.71)   |
| Lambeth              | 1955        | 0.6<br>(0.51–0.71)  |
| Lambeth              | 1956        | 0.6<br>(0.5–0.7)    |
| Lambeth              | 1957        | 0.61<br>(0.51–0.72) |
| Lambeth              | 1958        | 0.61<br>(0.51–0.72) |
| Lambeth              | 1959        | 0.61<br>(0.51–0.73) |
| Lambeth              | 1960        | 0.63<br>(0.52–0.75) |

**Table 15 Ratio of adjusted to unadjusted 5q0 values for scaled locations by year**

| <b>Geography</b> | <b>Year</b> | <b>Ratio</b>        |
|------------------|-------------|---------------------|
| Lambeth          | 1961        | 0.64<br>(0.53–0.77) |
| Lambeth          | 1962        | 0.67<br>(0.55–0.8)  |
| Lambeth          | 1963        | 0.68<br>(0.57–0.81) |
| Lambeth          | 1964        | 0.67<br>(0.55–0.8)  |
| Lambeth          | 1965        | 0.66<br>(0.54–0.79) |
| Lambeth          | 1966        | 0.69<br>(0.56–0.82) |
| Lambeth          | 1967        | 0.68<br>(0.56–0.82) |
| Lambeth          | 1968        | 0.72<br>(0.59–0.86) |
| Lambeth          | 1969        | 0.74<br>(0.6–0.89)  |
| Lambeth          | 1970        | 0.78<br>(0.63–0.94) |
| Lambeth          | 1971        | 0.81<br>(0.67–0.97) |
| Lambeth          | 1972        | 0.83<br>(0.68–0.98) |
| Lambeth          | 1973        | 0.84<br>(0.71–0.98) |
| Lambeth          | 1974        | 0.86<br>(0.74–1.01) |
| Lambeth          | 1975        | 0.88<br>(0.75–1.02) |
| Lambeth          | 1976        | 0.86<br>(0.74–1.0)  |
| Lambeth          | 1977        | 0.89<br>(0.77–1.02) |
| Lambeth          | 1978        | 0.95<br>(0.83–1.08) |
| Lambeth          | 1979        | 0.98<br>(0.87–1.11) |
| Lambeth          | 1980        | 0.97<br>(0.88–1.07) |
| Lambeth          | 1981        | 0.94<br>(0.85–1.03) |
| Lambeth          | 1982        | 0.95<br>(0.87–1.04) |
| Lambeth          | 1983        | 0.93<br>(0.85–1.02) |
| Lambeth          | 1984        | 0.93<br>(0.86–1.01) |
| Lambeth          | 1985        | 0.97<br>(0.89–1.05) |
| Lambeth          | 1986        | 0.99<br>(0.92–1.08) |
| Lambeth          | 1987        | 1.04<br>(0.96–1.11) |
| Lambeth          | 1988        | 1.06<br>(0.98–1.14) |
| Lambeth          | 1989        | 1.04<br>(0.95–1.13) |
| Lambeth          | 1990        | 1.02<br>(0.94–1.1)  |
| Lambeth          | 1991        | 0.99<br>(0.9–1.08)  |



**Table 15 Ratio of adjusted to unadjusted 5q0 values for scaled locations by year**

| <b>Geography</b> | <b>Year</b> | <b>Ratio</b>        |
|------------------|-------------|---------------------|
| Lambeth          | 1992        | 0.95<br>(0.86–1.03) |
| Lambeth          | 1993        | 0.95<br>(0.86–1.04) |
| Lambeth          | 1994        | 0.96<br>(0.88–1.05) |
| Lambeth          | 1995        | 0.97<br>(0.88–1.07) |
| Lambeth          | 1996        | 1.01<br>(0.91–1.12) |
| Lambeth          | 1997        | 0.99<br>(0.9–1.08)  |
| Lambeth          | 1998        | 1.01<br>(0.92–1.1)  |
| Lambeth          | 1999        | 1.05<br>(0.96–1.14) |
| Lambeth          | 2000        | 1.03<br>(0.93–1.15) |
| Lambeth          | 2001        | 1.05<br>(0.96–1.16) |
| Lambeth          | 2002        | 1.03<br>(0.94–1.13) |
| Lambeth          | 2003        | 1.06<br>(0.96–1.17) |
| Lambeth          | 2004        | 1.02<br>(0.92–1.12) |
| Lambeth          | 2005        | 1.02<br>(0.92–1.14) |
| Lambeth          | 2006        | 1.05<br>(0.94–1.16) |
| Lambeth          | 2007        | 1.03<br>(0.94–1.15) |
| Lambeth          | 2008        | 1.03<br>(0.93–1.13) |
| Lambeth          | 2009        | 1.04<br>(0.94–1.15) |
| Lambeth          | 2010        | 1.05<br>(0.96–1.15) |
| Lambeth          | 2011        | 1.03<br>(0.93–1.14) |
| Lambeth          | 2012        | 0.99<br>(0.89–1.1)  |
| Lambeth          | 2013        | 0.94<br>(0.84–1.05) |
| Lambeth          | 2014        | 0.9<br>(0.8–1.02)   |
| Lambeth          | 2015        | 0.91<br>(0.8–1.03)  |
| Lambeth          | 2016        | 0.91<br>(0.8–1.02)  |
| Lambeth          | 2017        | 0.95<br>(0.79–1.12) |
| Lewisham         | 1950        | 0.57<br>(0.47–0.68) |
| Lewisham         | 1951        | 0.66<br>(0.54–0.79) |
| Lewisham         | 1952        | 0.62<br>(0.52–0.74) |
| Lewisham         | 1953        | 0.63<br>(0.52–0.75) |
| Lewisham         | 1954        | 0.6<br>(0.5–0.71)   |

**Table 15 Ratio of adjusted to unadjusted 5q0 values for scaled locations by year**

| <b>Geography</b> | <b>Year</b> | <b>Ratio</b>        |
|------------------|-------------|---------------------|
| Lewisham         | 1955        | 0.6<br>(0.51–0.71)  |
| Lewisham         | 1956        | 0.6<br>(0.5–0.7)    |
| Lewisham         | 1957        | 0.61<br>(0.51–0.72) |
| Lewisham         | 1958        | 0.61<br>(0.51–0.72) |
| Lewisham         | 1959        | 0.61<br>(0.51–0.73) |
| Lewisham         | 1960        | 0.63<br>(0.52–0.75) |
| Lewisham         | 1961        | 0.64<br>(0.53–0.77) |
| Lewisham         | 1962        | 0.67<br>(0.55–0.8)  |
| Lewisham         | 1963        | 0.68<br>(0.57–0.81) |
| Lewisham         | 1964        | 0.67<br>(0.55–0.8)  |
| Lewisham         | 1965        | 0.66<br>(0.54–0.79) |
| Lewisham         | 1966        | 0.69<br>(0.56–0.82) |
| Lewisham         | 1967        | 0.68<br>(0.56–0.82) |
| Lewisham         | 1968        | 0.72<br>(0.59–0.86) |
| Lewisham         | 1969        | 0.74<br>(0.6–0.89)  |
| Lewisham         | 1970        | 0.78<br>(0.63–0.94) |
| Lewisham         | 1971        | 0.81<br>(0.67–0.97) |
| Lewisham         | 1972        | 0.83<br>(0.68–0.98) |
| Lewisham         | 1973        | 0.84<br>(0.71–0.98) |
| Lewisham         | 1974        | 0.86<br>(0.74–1.01) |
| Lewisham         | 1975        | 0.88<br>(0.75–1.02) |
| Lewisham         | 1976        | 0.86<br>(0.74–1.0)  |
| Lewisham         | 1977        | 0.89<br>(0.77–1.02) |
| Lewisham         | 1978        | 0.95<br>(0.83–1.08) |
| Lewisham         | 1979        | 0.98<br>(0.87–1.11) |
| Lewisham         | 1980        | 0.97<br>(0.88–1.08) |
| Lewisham         | 1981        | 0.94<br>(0.85–1.03) |
| Lewisham         | 1982        | 0.95<br>(0.87–1.04) |
| Lewisham         | 1983        | 0.93<br>(0.85–1.02) |
| Lewisham         | 1984        | 0.93<br>(0.86–1.01) |
| Lewisham         | 1985        | 0.97<br>(0.89–1.05) |

**Table 15 Ratio of adjusted to unadjusted 5q0 values for scaled locations by year**

| <b>Geography</b> | <b>Year</b> | <b>Ratio</b>        |
|------------------|-------------|---------------------|
| Lewisham         | 1986        | 0.99<br>(0.92–1.08) |
| Lewisham         | 1987        | 1.04<br>(0.96–1.12) |
| Lewisham         | 1988        | 1.06<br>(0.98–1.14) |
| Lewisham         | 1989        | 1.04<br>(0.95–1.13) |
| Lewisham         | 1990        | 1.02<br>(0.94–1.1)  |
| Lewisham         | 1991        | 0.99<br>(0.9–1.08)  |
| Lewisham         | 1992        | 0.95<br>(0.86–1.03) |
| Lewisham         | 1993        | 0.95<br>(0.86–1.04) |
| Lewisham         | 1994        | 0.96<br>(0.88–1.05) |
| Lewisham         | 1995        | 0.97<br>(0.88–1.07) |
| Lewisham         | 1996        | 1.01<br>(0.91–1.12) |
| Lewisham         | 1997        | 0.99<br>(0.9–1.08)  |
| Lewisham         | 1998        | 1.01<br>(0.92–1.1)  |
| Lewisham         | 1999        | 1.05<br>(0.96–1.14) |
| Lewisham         | 2000        | 1.03<br>(0.93–1.15) |
| Lewisham         | 2001        | 1.05<br>(0.96–1.16) |
| Lewisham         | 2002        | 1.03<br>(0.94–1.13) |
| Lewisham         | 2003        | 1.06<br>(0.96–1.17) |
| Lewisham         | 2004        | 1.02<br>(0.92–1.12) |
| Lewisham         | 2005        | 1.02<br>(0.92–1.14) |
| Lewisham         | 2006        | 1.05<br>(0.94–1.16) |
| Lewisham         | 2007        | 1.03<br>(0.94–1.15) |
| Lewisham         | 2008        | 1.03<br>(0.93–1.13) |
| Lewisham         | 2009        | 1.04<br>(0.94–1.15) |
| Lewisham         | 2010        | 1.05<br>(0.96–1.15) |
| Lewisham         | 2011        | 1.03<br>(0.93–1.14) |
| Lewisham         | 2012        | 0.99<br>(0.89–1.1)  |
| Lewisham         | 2013        | 0.94<br>(0.84–1.05) |
| Lewisham         | 2014        | 0.9<br>(0.8–1.02)   |
| Lewisham         | 2015        | 0.91<br>(0.8–1.03)  |
| Lewisham         | 2016        | 0.91<br>(0.8–1.02)  |

**Table 15 Ratio of adjusted to unadjusted 5q0 values for scaled locations by year**

| <b>Geography</b> | <b>Year</b> | <b>Ratio</b>        |
|------------------|-------------|---------------------|
| Lewisham         | 2017        | 0.95<br>(0.79–1.12) |
| Merton           | 1950        | 0.57<br>(0.47–0.67) |
| Merton           | 1951        | 0.66<br>(0.54–0.79) |
| Merton           | 1952        | 0.62<br>(0.51–0.74) |
| Merton           | 1953        | 0.63<br>(0.52–0.75) |
| Merton           | 1954        | 0.6<br>(0.5–0.71)   |
| Merton           | 1955        | 0.6<br>(0.51–0.71)  |
| Merton           | 1956        | 0.6<br>(0.5–0.7)    |
| Merton           | 1957        | 0.61<br>(0.51–0.72) |
| Merton           | 1958        | 0.6<br>(0.51–0.72)  |
| Merton           | 1959        | 0.61<br>(0.51–0.73) |
| Merton           | 1960        | 0.63<br>(0.52–0.74) |
| Merton           | 1961        | 0.64<br>(0.53–0.77) |
| Merton           | 1962        | 0.67<br>(0.55–0.8)  |
| Merton           | 1963        | 0.68<br>(0.56–0.81) |
| Merton           | 1964        | 0.67<br>(0.55–0.8)  |
| Merton           | 1965        | 0.66<br>(0.54–0.79) |
| Merton           | 1966        | 0.69<br>(0.56–0.82) |
| Merton           | 1967        | 0.68<br>(0.56–0.82) |
| Merton           | 1968        | 0.72<br>(0.59–0.86) |
| Merton           | 1969        | 0.74<br>(0.6–0.89)  |
| Merton           | 1970        | 0.78<br>(0.63–0.93) |
| Merton           | 1971        | 0.81<br>(0.67–0.97) |
| Merton           | 1972        | 0.83<br>(0.68–0.98) |
| Merton           | 1973        | 0.84<br>(0.71–0.98) |
| Merton           | 1974        | 0.86<br>(0.74–1.01) |
| Merton           | 1975        | 0.88<br>(0.75–1.02) |
| Merton           | 1976        | 0.86<br>(0.73–1.0)  |
| Merton           | 1977        | 0.89<br>(0.77–1.02) |
| Merton           | 1978        | 0.95<br>(0.83–1.08) |
| Merton           | 1979        | 0.98<br>(0.87–1.11) |

**Table 15 Ratio of adjusted to unadjusted 5q0 values for scaled locations by year**

| <b>Geography</b> | <b>Year</b> | <b>Ratio</b>        |
|------------------|-------------|---------------------|
| Merton           | 1980        | 0.97<br>(0.88–1.08) |
| Merton           | 1981        | 0.94<br>(0.85–1.03) |
| Merton           | 1982        | 0.95<br>(0.87–1.04) |
| Merton           | 1983        | 0.93<br>(0.85–1.02) |
| Merton           | 1984        | 0.93<br>(0.86–1.01) |
| Merton           | 1985        | 0.97<br>(0.89–1.05) |
| Merton           | 1986        | 0.99<br>(0.92–1.08) |
| Merton           | 1987        | 1.04<br>(0.96–1.12) |
| Merton           | 1988        | 1.06<br>(0.98–1.14) |
| Merton           | 1989        | 1.04<br>(0.95–1.13) |
| Merton           | 1990        | 1.02<br>(0.94–1.1)  |
| Merton           | 1991        | 0.99<br>(0.9–1.08)  |
| Merton           | 1992        | 0.95<br>(0.86–1.03) |
| Merton           | 1993        | 0.95<br>(0.86–1.04) |
| Merton           | 1994        | 0.96<br>(0.88–1.05) |
| Merton           | 1995        | 0.97<br>(0.88–1.07) |
| Merton           | 1996        | 1.01<br>(0.91–1.12) |
| Merton           | 1997        | 0.99<br>(0.9–1.08)  |
| Merton           | 1998        | 1.01<br>(0.92–1.1)  |
| Merton           | 1999        | 1.05<br>(0.96–1.14) |
| Merton           | 2000        | 1.03<br>(0.93–1.15) |
| Merton           | 2001        | 1.05<br>(0.96–1.16) |
| Merton           | 2002        | 1.03<br>(0.94–1.13) |
| Merton           | 2003        | 1.06<br>(0.96–1.17) |
| Merton           | 2004        | 1.02<br>(0.92–1.12) |
| Merton           | 2005        | 1.02<br>(0.92–1.14) |
| Merton           | 2006        | 1.05<br>(0.94–1.16) |
| Merton           | 2007        | 1.03<br>(0.94–1.15) |
| Merton           | 2008        | 1.03<br>(0.93–1.13) |
| Merton           | 2009        | 1.04<br>(0.94–1.15) |
| Merton           | 2010        | 1.05<br>(0.96–1.15) |

**Table 15 Ratio of adjusted to unadjusted 5q0 values for scaled locations by year**

| <b>Geography</b> | <b>Year</b> | <b>Ratio</b>        |
|------------------|-------------|---------------------|
| Merton           | 2011        | 1.03<br>(0.93–1.14) |
| Merton           | 2012        | 0.99<br>(0.89–1.1)  |
| Merton           | 2013        | 0.94<br>(0.84–1.05) |
| Merton           | 2014        | 0.9<br>(0.8–1.02)   |
| Merton           | 2015        | 0.91<br>(0.8–1.03)  |
| Merton           | 2016        | 0.91<br>(0.8–1.02)  |
| Merton           | 2017        | 0.95<br>(0.79–1.12) |
| Newham           | 1950        | 0.57<br>(0.47–0.68) |
| Newham           | 1951        | 0.66<br>(0.54–0.79) |
| Newham           | 1952        | 0.62<br>(0.52–0.74) |
| Newham           | 1953        | 0.63<br>(0.52–0.75) |
| Newham           | 1954        | 0.6<br>(0.5–0.71)   |
| Newham           | 1955        | 0.6<br>(0.51–0.71)  |
| Newham           | 1956        | 0.6<br>(0.5–0.7)    |
| Newham           | 1957        | 0.61<br>(0.51–0.72) |
| Newham           | 1958        | 0.61<br>(0.51–0.72) |
| Newham           | 1959        | 0.61<br>(0.51–0.73) |
| Newham           | 1960        | 0.63<br>(0.52–0.75) |
| Newham           | 1961        | 0.64<br>(0.53–0.77) |
| Newham           | 1962        | 0.67<br>(0.55–0.8)  |
| Newham           | 1963        | 0.68<br>(0.57–0.81) |
| Newham           | 1964        | 0.67<br>(0.55–0.8)  |
| Newham           | 1965        | 0.66<br>(0.54–0.79) |
| Newham           | 1966        | 0.69<br>(0.56–0.82) |
| Newham           | 1967        | 0.68<br>(0.56–0.82) |
| Newham           | 1968        | 0.72<br>(0.59–0.86) |
| Newham           | 1969        | 0.74<br>(0.6–0.89)  |
| Newham           | 1970        | 0.78<br>(0.63–0.94) |
| Newham           | 1971        | 0.81<br>(0.67–0.97) |
| Newham           | 1972        | 0.83<br>(0.68–0.98) |
| Newham           | 1973        | 0.84<br>(0.71–0.98) |

**Table 15 Ratio of adjusted to unadjusted 5q0 values for scaled locations by year**

| <b>Geography</b> | <b>Year</b> | <b>Ratio</b>        |
|------------------|-------------|---------------------|
| Newham           | 1974        | 0.86<br>(0.74–1.01) |
| Newham           | 1975        | 0.88<br>(0.75–1.02) |
| Newham           | 1976        | 0.86<br>(0.74–1.0)  |
| Newham           | 1977        | 0.89<br>(0.77–1.02) |
| Newham           | 1978        | 0.95<br>(0.83–1.08) |
| Newham           | 1979        | 0.98<br>(0.87–1.11) |
| Newham           | 1980        | 0.97<br>(0.88–1.08) |
| Newham           | 1981        | 0.94<br>(0.85–1.03) |
| Newham           | 1982        | 0.95<br>(0.87–1.04) |
| Newham           | 1983        | 0.93<br>(0.85–1.02) |
| Newham           | 1984        | 0.93<br>(0.86–1.01) |
| Newham           | 1985        | 0.97<br>(0.89–1.05) |
| Newham           | 1986        | 0.99<br>(0.92–1.08) |
| Newham           | 1987        | 1.04<br>(0.96–1.12) |
| Newham           | 1988        | 1.06<br>(0.98–1.14) |
| Newham           | 1989        | 1.04<br>(0.95–1.13) |
| Newham           | 1990        | 1.02<br>(0.94–1.1)  |
| Newham           | 1991        | 0.99<br>(0.9–1.08)  |
| Newham           | 1992        | 0.95<br>(0.86–1.03) |
| Newham           | 1993        | 0.95<br>(0.86–1.04) |
| Newham           | 1994        | 0.96<br>(0.88–1.05) |
| Newham           | 1995        | 0.97<br>(0.88–1.07) |
| Newham           | 1996        | 1.01<br>(0.91–1.12) |
| Newham           | 1997        | 0.99<br>(0.9–1.08)  |
| Newham           | 1998        | 1.01<br>(0.92–1.1)  |
| Newham           | 1999        | 1.05<br>(0.96–1.14) |
| Newham           | 2000        | 1.03<br>(0.93–1.15) |
| Newham           | 2001        | 1.05<br>(0.96–1.16) |
| Newham           | 2002        | 1.03<br>(0.94–1.13) |
| Newham           | 2003        | 1.06<br>(0.96–1.17) |
| Newham           | 2004        | 1.02<br>(0.92–1.12) |

**Table 15 Ratio of adjusted to unadjusted 5q0 values for scaled locations by year**

| <b>Geography</b> | <b>Year</b> | <b>Ratio</b>        |
|------------------|-------------|---------------------|
| Newham           | 2005        | 1.02<br>(0.92–1.14) |
| Newham           | 2006        | 1.05<br>(0.94–1.16) |
| Newham           | 2007        | 1.03<br>(0.94–1.15) |
| Newham           | 2008        | 1.03<br>(0.93–1.13) |
| Newham           | 2009        | 1.04<br>(0.94–1.15) |
| Newham           | 2010        | 1.05<br>(0.96–1.15) |
| Newham           | 2011        | 1.03<br>(0.93–1.14) |
| Newham           | 2012        | 0.99<br>(0.89–1.1)  |
| Newham           | 2013        | 0.94<br>(0.84–1.05) |
| Newham           | 2014        | 0.9<br>(0.8–1.02)   |
| Newham           | 2015        | 0.91<br>(0.8–1.03)  |
| Newham           | 2016        | 0.91<br>(0.8–1.02)  |
| Newham           | 2017        | 0.95<br>(0.79–1.12) |
| Redbridge        | 1950        | 0.56<br>(0.47–0.67) |
| Redbridge        | 1951        | 0.66<br>(0.54–0.79) |
| Redbridge        | 1952        | 0.62<br>(0.51–0.74) |
| Redbridge        | 1953        | 0.63<br>(0.52–0.75) |
| Redbridge        | 1954        | 0.6<br>(0.49–0.71)  |
| Redbridge        | 1955        | 0.6<br>(0.51–0.71)  |
| Redbridge        | 1956        | 0.6<br>(0.5–0.7)    |
| Redbridge        | 1957        | 0.61<br>(0.51–0.72) |
| Redbridge        | 1958        | 0.6<br>(0.51–0.72)  |
| Redbridge        | 1959        | 0.61<br>(0.51–0.73) |
| Redbridge        | 1960        | 0.63<br>(0.52–0.74) |
| Redbridge        | 1961        | 0.64<br>(0.53–0.77) |
| Redbridge        | 1962        | 0.67<br>(0.55–0.8)  |
| Redbridge        | 1963        | 0.68<br>(0.56–0.81) |
| Redbridge        | 1964        | 0.67<br>(0.55–0.8)  |
| Redbridge        | 1965        | 0.66<br>(0.54–0.79) |
| Redbridge        | 1966        | 0.69<br>(0.56–0.82) |
| Redbridge        | 1967        | 0.68<br>(0.55–0.82) |



**Table 15 Ratio of adjusted to unadjusted 5q0 values for scaled locations by year**

| <b>Geography</b> | <b>Year</b> | <b>Ratio</b>        |
|------------------|-------------|---------------------|
| Redbridge        | 1968        | 0.72<br>(0.59–0.86) |
| Redbridge        | 1969        | 0.74<br>(0.6–0.89)  |
| Redbridge        | 1970        | 0.78<br>(0.63–0.93) |
| Redbridge        | 1971        | 0.81<br>(0.67–0.97) |
| Redbridge        | 1972        | 0.83<br>(0.68–0.98) |
| Redbridge        | 1973        | 0.84<br>(0.71–0.98) |
| Redbridge        | 1974        | 0.86<br>(0.73–1.01) |
| Redbridge        | 1975        | 0.88<br>(0.75–1.02) |
| Redbridge        | 1976        | 0.86<br>(0.73–1.0)  |
| Redbridge        | 1977        | 0.89<br>(0.77–1.02) |
| Redbridge        | 1978        | 0.95<br>(0.83–1.08) |
| Redbridge        | 1979        | 0.98<br>(0.87–1.11) |
| Redbridge        | 1980        | 0.97<br>(0.88–1.08) |
| Redbridge        | 1981        | 0.94<br>(0.85–1.03) |
| Redbridge        | 1982        | 0.95<br>(0.87–1.04) |
| Redbridge        | 1983        | 0.93<br>(0.85–1.02) |
| Redbridge        | 1984        | 0.93<br>(0.86–1.01) |
| Redbridge        | 1985        | 0.97<br>(0.89–1.05) |
| Redbridge        | 1986        | 0.99<br>(0.92–1.08) |
| Redbridge        | 1987        | 1.04<br>(0.96–1.12) |
| Redbridge        | 1988        | 1.06<br>(0.98–1.14) |
| Redbridge        | 1989        | 1.04<br>(0.95–1.13) |
| Redbridge        | 1990        | 1.02<br>(0.94–1.1)  |
| Redbridge        | 1991        | 0.99<br>(0.9–1.08)  |
| Redbridge        | 1992        | 0.95<br>(0.86–1.03) |
| Redbridge        | 1993        | 0.95<br>(0.86–1.04) |
| Redbridge        | 1994        | 0.96<br>(0.88–1.05) |
| Redbridge        | 1995        | 0.97<br>(0.88–1.07) |
| Redbridge        | 1996        | 1.01<br>(0.91–1.12) |
| Redbridge        | 1997        | 0.99<br>(0.9–1.08)  |
| Redbridge        | 1998        | 1.01<br>(0.92–1.1)  |

**Table 15 Ratio of adjusted to unadjusted 5q0 values for scaled locations by year**

| <b>Geography</b>     | <b>Year</b> | <b>Ratio</b>        |
|----------------------|-------------|---------------------|
| Redbridge            | 1999        | 1.05<br>(0.96–1.14) |
| Redbridge            | 2000        | 1.03<br>(0.93–1.15) |
| Redbridge            | 2001        | 1.05<br>(0.96–1.16) |
| Redbridge            | 2002        | 1.03<br>(0.94–1.13) |
| Redbridge            | 2003        | 1.06<br>(0.96–1.17) |
| Redbridge            | 2004        | 1.02<br>(0.92–1.12) |
| Redbridge            | 2005        | 1.02<br>(0.92–1.14) |
| Redbridge            | 2006        | 1.05<br>(0.94–1.16) |
| Redbridge            | 2007        | 1.03<br>(0.94–1.15) |
| Redbridge            | 2008        | 1.03<br>(0.93–1.13) |
| Redbridge            | 2009        | 1.04<br>(0.94–1.15) |
| Redbridge            | 2010        | 1.05<br>(0.96–1.15) |
| Redbridge            | 2011        | 1.03<br>(0.93–1.14) |
| Redbridge            | 2012        | 0.99<br>(0.89–1.1)  |
| Redbridge            | 2013        | 0.94<br>(0.84–1.05) |
| Redbridge            | 2014        | 0.9<br>(0.8–1.02)   |
| Redbridge            | 2015        | 0.91<br>(0.8–1.03)  |
| Redbridge            | 2016        | 0.91<br>(0.8–1.02)  |
| Redbridge            | 2017        | 0.95<br>(0.79–1.12) |
| Richmond upon Thames | 1950        | 0.56<br>(0.47–0.67) |
| Richmond upon Thames | 1951        | 0.66<br>(0.54–0.79) |
| Richmond upon Thames | 1952        | 0.62<br>(0.51–0.74) |
| Richmond upon Thames | 1953        | 0.63<br>(0.52–0.75) |
| Richmond upon Thames | 1954        | 0.6<br>(0.49–0.71)  |
| Richmond upon Thames | 1955        | 0.6<br>(0.51–0.71)  |
| Richmond upon Thames | 1956        | 0.6<br>(0.5–0.7)    |
| Richmond upon Thames | 1957        | 0.61<br>(0.51–0.72) |
| Richmond upon Thames | 1958        | 0.6<br>(0.51–0.72)  |
| Richmond upon Thames | 1959        | 0.61<br>(0.51–0.73) |
| Richmond upon Thames | 1960        | 0.63<br>(0.52–0.74) |
| Richmond upon Thames | 1961        | 0.64<br>(0.53–0.77) |

**Table 15 Ratio of adjusted to unadjusted 5q0 values for scaled locations by year**

| <b>Geography</b>     | <b>Year</b> | <b>Ratio</b>        |
|----------------------|-------------|---------------------|
| Richmond upon Thames | 1962        | 0.67<br>(0.55–0.8)  |
| Richmond upon Thames | 1963        | 0.68<br>(0.56–0.81) |
| Richmond upon Thames | 1964        | 0.67<br>(0.55–0.8)  |
| Richmond upon Thames | 1965        | 0.66<br>(0.54–0.79) |
| Richmond upon Thames | 1966        | 0.69<br>(0.56–0.82) |
| Richmond upon Thames | 1967        | 0.68<br>(0.55–0.82) |
| Richmond upon Thames | 1968        | 0.72<br>(0.59–0.86) |
| Richmond upon Thames | 1969        | 0.74<br>(0.6–0.89)  |
| Richmond upon Thames | 1970        | 0.78<br>(0.63–0.93) |
| Richmond upon Thames | 1971        | 0.81<br>(0.67–0.97) |
| Richmond upon Thames | 1972        | 0.83<br>(0.68–0.98) |
| Richmond upon Thames | 1973        | 0.84<br>(0.71–0.98) |
| Richmond upon Thames | 1974        | 0.86<br>(0.74–1.01) |
| Richmond upon Thames | 1975        | 0.88<br>(0.75–1.02) |
| Richmond upon Thames | 1976        | 0.86<br>(0.73–1.0)  |
| Richmond upon Thames | 1977        | 0.89<br>(0.77–1.02) |
| Richmond upon Thames | 1978        | 0.95<br>(0.83–1.08) |
| Richmond upon Thames | 1979        | 0.98<br>(0.87–1.11) |
| Richmond upon Thames | 1980        | 0.97<br>(0.88–1.08) |
| Richmond upon Thames | 1981        | 0.94<br>(0.85–1.03) |
| Richmond upon Thames | 1982        | 0.95<br>(0.87–1.04) |
| Richmond upon Thames | 1983        | 0.93<br>(0.85–1.02) |
| Richmond upon Thames | 1984        | 0.93<br>(0.86–1.01) |
| Richmond upon Thames | 1985        | 0.97<br>(0.89–1.05) |
| Richmond upon Thames | 1986        | 0.99<br>(0.92–1.08) |
| Richmond upon Thames | 1987        | 1.04<br>(0.96–1.12) |
| Richmond upon Thames | 1988        | 1.06<br>(0.98–1.14) |
| Richmond upon Thames | 1989        | 1.04<br>(0.95–1.13) |
| Richmond upon Thames | 1990        | 1.02<br>(0.94–1.1)  |
| Richmond upon Thames | 1991        | 0.99<br>(0.9–1.08)  |
| Richmond upon Thames | 1992        | 0.95<br>(0.86–1.03) |

**Table 15 Ratio of adjusted to unadjusted 5q0 values for scaled locations by year**

| <b>Geography</b>     | <b>Year</b> | <b>Ratio</b>        |
|----------------------|-------------|---------------------|
| Richmond upon Thames | 1993        | 0.95<br>(0.86–1.04) |
| Richmond upon Thames | 1994        | 0.96<br>(0.88–1.05) |
| Richmond upon Thames | 1995        | 0.97<br>(0.88–1.07) |
| Richmond upon Thames | 1996        | 1.01<br>(0.91–1.12) |
| Richmond upon Thames | 1997        | 0.99<br>(0.9–1.08)  |
| Richmond upon Thames | 1998        | 1.01<br>(0.92–1.1)  |
| Richmond upon Thames | 1999        | 1.05<br>(0.96–1.14) |
| Richmond upon Thames | 2000        | 1.03<br>(0.93–1.15) |
| Richmond upon Thames | 2001        | 1.05<br>(0.96–1.16) |
| Richmond upon Thames | 2002        | 1.03<br>(0.94–1.13) |
| Richmond upon Thames | 2003        | 1.06<br>(0.96–1.17) |
| Richmond upon Thames | 2004        | 1.02<br>(0.92–1.12) |
| Richmond upon Thames | 2005        | 1.02<br>(0.92–1.14) |
| Richmond upon Thames | 2006        | 1.05<br>(0.94–1.16) |
| Richmond upon Thames | 2007        | 1.03<br>(0.94–1.15) |
| Richmond upon Thames | 2008        | 1.03<br>(0.93–1.13) |
| Richmond upon Thames | 2009        | 1.04<br>(0.94–1.15) |
| Richmond upon Thames | 2010        | 1.05<br>(0.96–1.15) |
| Richmond upon Thames | 2011        | 1.03<br>(0.93–1.14) |
| Richmond upon Thames | 2012        | 0.99<br>(0.89–1.1)  |
| Richmond upon Thames | 2013        | 0.94<br>(0.84–1.05) |
| Richmond upon Thames | 2014        | 0.9<br>(0.8–1.02)   |
| Richmond upon Thames | 2015        | 0.91<br>(0.8–1.03)  |
| Richmond upon Thames | 2016        | 0.91<br>(0.8–1.02)  |
| Richmond upon Thames | 2017        | 0.95<br>(0.79–1.12) |
| Southwark            | 1950        | 0.57<br>(0.47–0.67) |
| Southwark            | 1951        | 0.66<br>(0.54–0.79) |
| Southwark            | 1952        | 0.62<br>(0.51–0.74) |
| Southwark            | 1953        | 0.63<br>(0.52–0.75) |
| Southwark            | 1954        | 0.6<br>(0.5–0.71)   |
| Southwark            | 1955        | 0.6<br>(0.51–0.71)  |

**Table 15 Ratio of adjusted to unadjusted 5q0 values for scaled locations by year**

| <b>Geography</b> | <b>Year</b> | <b>Ratio</b>        |
|------------------|-------------|---------------------|
| Southwark        | 1956        | 0.6<br>(0.5–0.7)    |
| Southwark        | 1957        | 0.61<br>(0.51–0.72) |
| Southwark        | 1958        | 0.6<br>(0.51–0.72)  |
| Southwark        | 1959        | 0.61<br>(0.51–0.73) |
| Southwark        | 1960        | 0.63<br>(0.52–0.74) |
| Southwark        | 1961        | 0.64<br>(0.53–0.77) |
| Southwark        | 1962        | 0.67<br>(0.55–0.8)  |
| Southwark        | 1963        | 0.68<br>(0.56–0.81) |
| Southwark        | 1964        | 0.67<br>(0.55–0.8)  |
| Southwark        | 1965        | 0.66<br>(0.54–0.79) |
| Southwark        | 1966        | 0.69<br>(0.56–0.82) |
| Southwark        | 1967        | 0.68<br>(0.56–0.82) |
| Southwark        | 1968        | 0.72<br>(0.59–0.86) |
| Southwark        | 1969        | 0.74<br>(0.6–0.89)  |
| Southwark        | 1970        | 0.78<br>(0.63–0.94) |
| Southwark        | 1971        | 0.81<br>(0.67–0.97) |
| Southwark        | 1972        | 0.83<br>(0.68–0.98) |
| Southwark        | 1973        | 0.84<br>(0.71–0.98) |
| Southwark        | 1974        | 0.86<br>(0.74–1.01) |
| Southwark        | 1975        | 0.88<br>(0.75–1.02) |
| Southwark        | 1976        | 0.86<br>(0.73–1.0)  |
| Southwark        | 1977        | 0.89<br>(0.77–1.02) |
| Southwark        | 1978        | 0.95<br>(0.83–1.08) |
| Southwark        | 1979        | 0.98<br>(0.87–1.11) |
| Southwark        | 1980        | 0.97<br>(0.88–1.08) |
| Southwark        | 1981        | 0.94<br>(0.85–1.03) |
| Southwark        | 1982        | 0.95<br>(0.87–1.04) |
| Southwark        | 1983        | 0.93<br>(0.85–1.02) |
| Southwark        | 1984        | 0.93<br>(0.86–1.01) |
| Southwark        | 1985        | 0.97<br>(0.89–1.05) |
| Southwark        | 1986        | 0.99<br>(0.92–1.08) |

**Table 15 Ratio of adjusted to unadjusted 5q0 values for scaled locations by year**

| <b>Geography</b> | <b>Year</b> | <b>Ratio</b>        |
|------------------|-------------|---------------------|
| Southwark        | 1987        | 1.04<br>(0.96–1.11) |
| Southwark        | 1988        | 1.06<br>(0.98–1.14) |
| Southwark        | 1989        | 1.04<br>(0.95–1.13) |
| Southwark        | 1990        | 1.02<br>(0.94–1.1)  |
| Southwark        | 1991        | 0.99<br>(0.9–1.08)  |
| Southwark        | 1992        | 0.95<br>(0.86–1.03) |
| Southwark        | 1993        | 0.95<br>(0.86–1.04) |
| Southwark        | 1994        | 0.96<br>(0.88–1.05) |
| Southwark        | 1995        | 0.97<br>(0.88–1.07) |
| Southwark        | 1996        | 1.01<br>(0.91–1.12) |
| Southwark        | 1997        | 0.99<br>(0.9–1.08)  |
| Southwark        | 1998        | 1.01<br>(0.92–1.1)  |
| Southwark        | 1999        | 1.05<br>(0.96–1.14) |
| Southwark        | 2000        | 1.03<br>(0.93–1.15) |
| Southwark        | 2001        | 1.05<br>(0.96–1.16) |
| Southwark        | 2002        | 1.03<br>(0.94–1.13) |
| Southwark        | 2003        | 1.06<br>(0.96–1.17) |
| Southwark        | 2004        | 1.02<br>(0.92–1.12) |
| Southwark        | 2005        | 1.02<br>(0.92–1.14) |
| Southwark        | 2006        | 1.05<br>(0.94–1.16) |
| Southwark        | 2007        | 1.03<br>(0.94–1.15) |
| Southwark        | 2008        | 1.03<br>(0.93–1.13) |
| Southwark        | 2009        | 1.04<br>(0.94–1.15) |
| Southwark        | 2010        | 1.05<br>(0.96–1.15) |
| Southwark        | 2011        | 1.03<br>(0.93–1.14) |
| Southwark        | 2012        | 0.99<br>(0.89–1.1)  |
| Southwark        | 2013        | 0.94<br>(0.84–1.05) |
| Southwark        | 2014        | 0.9<br>(0.8–1.02)   |
| Southwark        | 2015        | 0.91<br>(0.8–1.03)  |
| Southwark        | 2016        | 0.91<br>(0.8–1.02)  |
| Southwark        | 2017        | 0.95<br>(0.79–1.12) |

**Table 15 Ratio of adjusted to unadjusted 5q0 values for scaled locations by year**

| <b>Geography</b> | <b>Year</b> | <b>Ratio</b>        |
|------------------|-------------|---------------------|
| Sutton           | 1950        | 0.57<br>(0.47–0.67) |
| Sutton           | 1951        | 0.66<br>(0.54–0.79) |
| Sutton           | 1952        | 0.62<br>(0.51–0.74) |
| Sutton           | 1953        | 0.63<br>(0.52–0.75) |
| Sutton           | 1954        | 0.6<br>(0.5–0.71)   |
| Sutton           | 1955        | 0.6<br>(0.51–0.71)  |
| Sutton           | 1956        | 0.6<br>(0.5–0.7)    |
| Sutton           | 1957        | 0.61<br>(0.51–0.72) |
| Sutton           | 1958        | 0.6<br>(0.51–0.72)  |
| Sutton           | 1959        | 0.61<br>(0.51–0.73) |
| Sutton           | 1960        | 0.63<br>(0.52–0.74) |
| Sutton           | 1961        | 0.64<br>(0.53–0.77) |
| Sutton           | 1962        | 0.67<br>(0.55–0.8)  |
| Sutton           | 1963        | 0.68<br>(0.56–0.81) |
| Sutton           | 1964        | 0.67<br>(0.55–0.8)  |
| Sutton           | 1965        | 0.66<br>(0.54–0.79) |
| Sutton           | 1966        | 0.69<br>(0.56–0.82) |
| Sutton           | 1967        | 0.68<br>(0.55–0.82) |
| Sutton           | 1968        | 0.72<br>(0.59–0.86) |
| Sutton           | 1969        | 0.74<br>(0.6–0.89)  |
| Sutton           | 1970        | 0.78<br>(0.63–0.93) |
| Sutton           | 1971        | 0.81<br>(0.67–0.97) |
| Sutton           | 1972        | 0.83<br>(0.68–0.98) |
| Sutton           | 1973        | 0.84<br>(0.71–0.98) |
| Sutton           | 1974        | 0.86<br>(0.73–1.01) |
| Sutton           | 1975        | 0.88<br>(0.75–1.02) |
| Sutton           | 1976        | 0.86<br>(0.73–1.0)  |
| Sutton           | 1977        | 0.89<br>(0.77–1.02) |
| Sutton           | 1978        | 0.95<br>(0.83–1.08) |
| Sutton           | 1979        | 0.98<br>(0.87–1.11) |
| Sutton           | 1980        | 0.97<br>(0.88–1.08) |

**Table 15 Ratio of adjusted to unadjusted 5q0 values for scaled locations by year**

| <b>Geography</b> | <b>Year</b> | <b>Ratio</b>        |
|------------------|-------------|---------------------|
| Sutton           | 1981        | 0.94<br>(0.85–1.03) |
| Sutton           | 1982        | 0.95<br>(0.87–1.04) |
| Sutton           | 1983        | 0.93<br>(0.85–1.02) |
| Sutton           | 1984        | 0.93<br>(0.86–1.01) |
| Sutton           | 1985        | 0.97<br>(0.89–1.05) |
| Sutton           | 1986        | 0.99<br>(0.92–1.08) |
| Sutton           | 1987        | 1.04<br>(0.96–1.12) |
| Sutton           | 1988        | 1.06<br>(0.98–1.14) |
| Sutton           | 1989        | 1.04<br>(0.95–1.13) |
| Sutton           | 1990        | 1.02<br>(0.94–1.1)  |
| Sutton           | 1991        | 0.99<br>(0.9–1.08)  |
| Sutton           | 1992        | 0.95<br>(0.86–1.03) |
| Sutton           | 1993        | 0.95<br>(0.86–1.04) |
| Sutton           | 1994        | 0.96<br>(0.88–1.05) |
| Sutton           | 1995        | 0.97<br>(0.88–1.07) |
| Sutton           | 1996        | 1.01<br>(0.91–1.12) |
| Sutton           | 1997        | 0.99<br>(0.9–1.08)  |
| Sutton           | 1998        | 1.01<br>(0.92–1.1)  |
| Sutton           | 1999        | 1.05<br>(0.96–1.14) |
| Sutton           | 2000        | 1.03<br>(0.93–1.15) |
| Sutton           | 2001        | 1.05<br>(0.96–1.16) |
| Sutton           | 2002        | 1.03<br>(0.94–1.13) |
| Sutton           | 2003        | 1.06<br>(0.96–1.17) |
| Sutton           | 2004        | 1.02<br>(0.92–1.12) |
| Sutton           | 2005        | 1.02<br>(0.92–1.14) |
| Sutton           | 2006        | 1.05<br>(0.94–1.16) |
| Sutton           | 2007        | 1.03<br>(0.94–1.15) |
| Sutton           | 2008        | 1.03<br>(0.93–1.13) |
| Sutton           | 2009        | 1.04<br>(0.94–1.15) |
| Sutton           | 2010        | 1.05<br>(0.96–1.15) |
| Sutton           | 2011        | 1.03<br>(0.93–1.14) |



**Table 15 Ratio of adjusted to unadjusted 5q0 values for scaled locations by year**

| <b>Geography</b> | <b>Year</b> | <b>Ratio</b>        |
|------------------|-------------|---------------------|
| Sutton           | 2012        | 0.99<br>(0.89–1.1)  |
| Sutton           | 2013        | 0.94<br>(0.84–1.05) |
| Sutton           | 2014        | 0.9<br>(0.8–1.02)   |
| Sutton           | 2015        | 0.91<br>(0.8–1.03)  |
| Sutton           | 2016        | 0.91<br>(0.8–1.02)  |
| Sutton           | 2017        | 0.95<br>(0.79–1.12) |
| Tower Hamlets    | 1950        | 0.57<br>(0.47–0.68) |
| Tower Hamlets    | 1951        | 0.66<br>(0.54–0.79) |
| Tower Hamlets    | 1952        | 0.62<br>(0.52–0.74) |
| Tower Hamlets    | 1953        | 0.63<br>(0.52–0.75) |
| Tower Hamlets    | 1954        | 0.6<br>(0.5–0.71)   |
| Tower Hamlets    | 1955        | 0.6<br>(0.51–0.71)  |
| Tower Hamlets    | 1956        | 0.6<br>(0.5–0.7)    |
| Tower Hamlets    | 1957        | 0.61<br>(0.51–0.72) |
| Tower Hamlets    | 1958        | 0.61<br>(0.51–0.72) |
| Tower Hamlets    | 1959        | 0.61<br>(0.51–0.73) |
| Tower Hamlets    | 1960        | 0.63<br>(0.52–0.75) |
| Tower Hamlets    | 1961        | 0.64<br>(0.53–0.77) |
| Tower Hamlets    | 1962        | 0.67<br>(0.55–0.8)  |
| Tower Hamlets    | 1963        | 0.68<br>(0.57–0.81) |
| Tower Hamlets    | 1964        | 0.67<br>(0.55–0.8)  |
| Tower Hamlets    | 1965        | 0.66<br>(0.54–0.79) |
| Tower Hamlets    | 1966        | 0.69<br>(0.56–0.82) |
| Tower Hamlets    | 1967        | 0.68<br>(0.56–0.82) |
| Tower Hamlets    | 1968        | 0.72<br>(0.59–0.86) |
| Tower Hamlets    | 1969        | 0.74<br>(0.6–0.89)  |
| Tower Hamlets    | 1970        | 0.78<br>(0.63–0.94) |
| Tower Hamlets    | 1971        | 0.81<br>(0.67–0.97) |
| Tower Hamlets    | 1972        | 0.83<br>(0.68–0.98) |
| Tower Hamlets    | 1973        | 0.84<br>(0.71–0.98) |
| Tower Hamlets    | 1974        | 0.86<br>(0.74–1.01) |

**Table 15 Ratio of adjusted to unadjusted 5q0 values for scaled locations by year**

| <b>Geography</b> | <b>Year</b> | <b>Ratio</b>        |
|------------------|-------------|---------------------|
| Tower Hamlets    | 1975        | 0.88<br>(0.75–1.02) |
| Tower Hamlets    | 1976        | 0.86<br>(0.74–1.0)  |
| Tower Hamlets    | 1977        | 0.89<br>(0.77–1.02) |
| Tower Hamlets    | 1978        | 0.95<br>(0.83–1.08) |
| Tower Hamlets    | 1979        | 0.98<br>(0.87–1.11) |
| Tower Hamlets    | 1980        | 0.97<br>(0.88–1.07) |
| Tower Hamlets    | 1981        | 0.94<br>(0.85–1.03) |
| Tower Hamlets    | 1982        | 0.95<br>(0.87–1.04) |
| Tower Hamlets    | 1983        | 0.93<br>(0.85–1.02) |
| Tower Hamlets    | 1984        | 0.93<br>(0.86–1.01) |
| Tower Hamlets    | 1985        | 0.97<br>(0.89–1.05) |
| Tower Hamlets    | 1986        | 0.99<br>(0.92–1.08) |
| Tower Hamlets    | 1987        | 1.04<br>(0.96–1.12) |
| Tower Hamlets    | 1988        | 1.06<br>(0.98–1.14) |
| Tower Hamlets    | 1989        | 1.04<br>(0.95–1.13) |
| Tower Hamlets    | 1990        | 1.02<br>(0.94–1.1)  |
| Tower Hamlets    | 1991        | 0.99<br>(0.9–1.08)  |
| Tower Hamlets    | 1992        | 0.95<br>(0.86–1.03) |
| Tower Hamlets    | 1993        | 0.95<br>(0.86–1.04) |
| Tower Hamlets    | 1994        | 0.96<br>(0.88–1.05) |
| Tower Hamlets    | 1995        | 0.97<br>(0.88–1.07) |
| Tower Hamlets    | 1996        | 1.01<br>(0.91–1.12) |
| Tower Hamlets    | 1997        | 0.99<br>(0.9–1.08)  |
| Tower Hamlets    | 1998        | 1.01<br>(0.92–1.1)  |
| Tower Hamlets    | 1999        | 1.05<br>(0.96–1.14) |
| Tower Hamlets    | 2000        | 1.03<br>(0.93–1.15) |
| Tower Hamlets    | 2001        | 1.05<br>(0.96–1.16) |
| Tower Hamlets    | 2002        | 1.03<br>(0.94–1.13) |
| Tower Hamlets    | 2003        | 1.06<br>(0.96–1.17) |
| Tower Hamlets    | 2004        | 1.02<br>(0.92–1.12) |
| Tower Hamlets    | 2005        | 1.02<br>(0.92–1.14) |

**Table 15 Ratio of adjusted to unadjusted 5q0 values for scaled locations by year**

| <b>Geography</b> | <b>Year</b> | <b>Ratio</b>        |
|------------------|-------------|---------------------|
| Tower Hamlets    | 2006        | 1.05<br>(0.94–1.16) |
| Tower Hamlets    | 2007        | 1.03<br>(0.94–1.15) |
| Tower Hamlets    | 2008        | 1.03<br>(0.93–1.13) |
| Tower Hamlets    | 2009        | 1.04<br>(0.94–1.15) |
| Tower Hamlets    | 2010        | 1.05<br>(0.96–1.15) |
| Tower Hamlets    | 2011        | 1.03<br>(0.93–1.14) |
| Tower Hamlets    | 2012        | 0.99<br>(0.89–1.1)  |
| Tower Hamlets    | 2013        | 0.94<br>(0.84–1.05) |
| Tower Hamlets    | 2014        | 0.9<br>(0.8–1.02)   |
| Tower Hamlets    | 2015        | 0.91<br>(0.8–1.03)  |
| Tower Hamlets    | 2016        | 0.91<br>(0.8–1.02)  |
| Tower Hamlets    | 2017        | 0.95<br>(0.79–1.12) |
| Waltham Forest   | 1950        | 0.57<br>(0.47–0.68) |
| Waltham Forest   | 1951        | 0.66<br>(0.54–0.79) |
| Waltham Forest   | 1952        | 0.62<br>(0.52–0.74) |
| Waltham Forest   | 1953        | 0.63<br>(0.52–0.75) |
| Waltham Forest   | 1954        | 0.6<br>(0.5–0.71)   |
| Waltham Forest   | 1955        | 0.6<br>(0.51–0.71)  |
| Waltham Forest   | 1956        | 0.6<br>(0.5–0.7)    |
| Waltham Forest   | 1957        | 0.61<br>(0.51–0.72) |
| Waltham Forest   | 1958        | 0.61<br>(0.51–0.72) |
| Waltham Forest   | 1959        | 0.61<br>(0.51–0.73) |
| Waltham Forest   | 1960        | 0.63<br>(0.52–0.75) |
| Waltham Forest   | 1961        | 0.64<br>(0.53–0.77) |
| Waltham Forest   | 1962        | 0.67<br>(0.55–0.8)  |
| Waltham Forest   | 1963        | 0.68<br>(0.57–0.81) |
| Waltham Forest   | 1964        | 0.67<br>(0.55–0.8)  |
| Waltham Forest   | 1965        | 0.66<br>(0.54–0.79) |
| Waltham Forest   | 1966        | 0.69<br>(0.56–0.82) |
| Waltham Forest   | 1967        | 0.68<br>(0.56–0.82) |
| Waltham Forest   | 1968        | 0.72<br>(0.59–0.86) |

**Table 15 Ratio of adjusted to unadjusted 5q0 values for scaled locations by year**

| <b>Geography</b> | <b>Year</b> | <b>Ratio</b>        |
|------------------|-------------|---------------------|
| Waltham Forest   | 1969        | 0.74<br>(0.6–0.89)  |
| Waltham Forest   | 1970        | 0.78<br>(0.63–0.94) |
| Waltham Forest   | 1971        | 0.81<br>(0.67–0.97) |
| Waltham Forest   | 1972        | 0.83<br>(0.68–0.98) |
| Waltham Forest   | 1973        | 0.84<br>(0.71–0.98) |
| Waltham Forest   | 1974        | 0.86<br>(0.74–1.01) |
| Waltham Forest   | 1975        | 0.88<br>(0.75–1.02) |
| Waltham Forest   | 1976        | 0.86<br>(0.74–1.0)  |
| Waltham Forest   | 1977        | 0.89<br>(0.77–1.02) |
| Waltham Forest   | 1978        | 0.95<br>(0.83–1.08) |
| Waltham Forest   | 1979        | 0.98<br>(0.87–1.11) |
| Waltham Forest   | 1980        | 0.97<br>(0.88–1.08) |
| Waltham Forest   | 1981        | 0.94<br>(0.85–1.03) |
| Waltham Forest   | 1982        | 0.95<br>(0.87–1.04) |
| Waltham Forest   | 1983        | 0.93<br>(0.85–1.02) |
| Waltham Forest   | 1984        | 0.93<br>(0.86–1.01) |
| Waltham Forest   | 1985        | 0.97<br>(0.89–1.05) |
| Waltham Forest   | 1986        | 0.99<br>(0.92–1.08) |
| Waltham Forest   | 1987        | 1.04<br>(0.96–1.12) |
| Waltham Forest   | 1988        | 1.06<br>(0.98–1.14) |
| Waltham Forest   | 1989        | 1.04<br>(0.95–1.13) |
| Waltham Forest   | 1990        | 1.02<br>(0.94–1.1)  |
| Waltham Forest   | 1991        | 0.99<br>(0.9–1.08)  |
| Waltham Forest   | 1992        | 0.95<br>(0.86–1.03) |
| Waltham Forest   | 1993        | 0.95<br>(0.86–1.04) |
| Waltham Forest   | 1994        | 0.96<br>(0.88–1.05) |
| Waltham Forest   | 1995        | 0.97<br>(0.88–1.07) |
| Waltham Forest   | 1996        | 1.01<br>(0.91–1.12) |
| Waltham Forest   | 1997        | 0.99<br>(0.9–1.08)  |
| Waltham Forest   | 1998        | 1.01<br>(0.92–1.1)  |
| Waltham Forest   | 1999        | 1.05<br>(0.96–1.14) |

**Table 15 Ratio of adjusted to unadjusted 5q0 values for scaled locations by year**

| <b>Geography</b> | <b>Year</b> | <b>Ratio</b>        |
|------------------|-------------|---------------------|
| Waltham Forest   | 2000        | 1.03<br>(0.93–1.15) |
| Waltham Forest   | 2001        | 1.05<br>(0.96–1.16) |
| Waltham Forest   | 2002        | 1.03<br>(0.94–1.13) |
| Waltham Forest   | 2003        | 1.06<br>(0.96–1.17) |
| Waltham Forest   | 2004        | 1.02<br>(0.92–1.12) |
| Waltham Forest   | 2005        | 1.02<br>(0.92–1.14) |
| Waltham Forest   | 2006        | 1.05<br>(0.94–1.16) |
| Waltham Forest   | 2007        | 1.03<br>(0.94–1.15) |
| Waltham Forest   | 2008        | 1.03<br>(0.93–1.13) |
| Waltham Forest   | 2009        | 1.04<br>(0.94–1.15) |
| Waltham Forest   | 2010        | 1.05<br>(0.96–1.15) |
| Waltham Forest   | 2011        | 1.03<br>(0.93–1.14) |
| Waltham Forest   | 2012        | 0.99<br>(0.89–1.1)  |
| Waltham Forest   | 2013        | 0.94<br>(0.84–1.05) |
| Waltham Forest   | 2014        | 0.9<br>(0.8–1.02)   |
| Waltham Forest   | 2015        | 0.91<br>(0.8–1.03)  |
| Waltham Forest   | 2016        | 0.91<br>(0.8–1.02)  |
| Waltham Forest   | 2017        | 0.95<br>(0.79–1.12) |
| Wandsworth       | 1950        | 0.57<br>(0.47–0.68) |
| Wandsworth       | 1951        | 0.66<br>(0.54–0.79) |
| Wandsworth       | 1952        | 0.62<br>(0.52–0.74) |
| Wandsworth       | 1953        | 0.63<br>(0.52–0.75) |
| Wandsworth       | 1954        | 0.6<br>(0.5–0.71)   |
| Wandsworth       | 1955        | 0.6<br>(0.51–0.71)  |
| Wandsworth       | 1956        | 0.6<br>(0.5–0.7)    |
| Wandsworth       | 1957        | 0.61<br>(0.51–0.72) |
| Wandsworth       | 1958        | 0.6<br>(0.51–0.72)  |
| Wandsworth       | 1959        | 0.61<br>(0.51–0.73) |
| Wandsworth       | 1960        | 0.63<br>(0.52–0.74) |
| Wandsworth       | 1961        | 0.64<br>(0.53–0.77) |
| Wandsworth       | 1962        | 0.67<br>(0.55–0.8)  |

**Table 15 Ratio of adjusted to unadjusted 5q0 values for scaled locations by year**

| <b>Geography</b> | <b>Year</b> | <b>Ratio</b>        |
|------------------|-------------|---------------------|
| Wandsworth       | 1963        | 0.68<br>(0.57–0.81) |
| Wandsworth       | 1964        | 0.67<br>(0.55–0.8)  |
| Wandsworth       | 1965        | 0.66<br>(0.54–0.79) |
| Wandsworth       | 1966        | 0.69<br>(0.56–0.82) |
| Wandsworth       | 1967        | 0.68<br>(0.56–0.82) |
| Wandsworth       | 1968        | 0.72<br>(0.59–0.86) |
| Wandsworth       | 1969        | 0.74<br>(0.6–0.89)  |
| Wandsworth       | 1970        | 0.78<br>(0.63–0.94) |
| Wandsworth       | 1971        | 0.81<br>(0.67–0.97) |
| Wandsworth       | 1972        | 0.83<br>(0.68–0.98) |
| Wandsworth       | 1973        | 0.84<br>(0.71–0.98) |
| Wandsworth       | 1974        | 0.86<br>(0.74–1.01) |
| Wandsworth       | 1975        | 0.88<br>(0.75–1.02) |
| Wandsworth       | 1976        | 0.86<br>(0.74–1.0)  |
| Wandsworth       | 1977        | 0.89<br>(0.77–1.02) |
| Wandsworth       | 1978        | 0.95<br>(0.83–1.08) |
| Wandsworth       | 1979        | 0.98<br>(0.87–1.11) |
| Wandsworth       | 1980        | 0.97<br>(0.88–1.08) |
| Wandsworth       | 1981        | 0.94<br>(0.85–1.03) |
| Wandsworth       | 1982        | 0.95<br>(0.87–1.04) |
| Wandsworth       | 1983        | 0.93<br>(0.85–1.02) |
| Wandsworth       | 1984        | 0.93<br>(0.86–1.01) |
| Wandsworth       | 1985        | 0.97<br>(0.89–1.05) |
| Wandsworth       | 1986        | 0.99<br>(0.92–1.08) |
| Wandsworth       | 1987        | 1.04<br>(0.96–1.12) |
| Wandsworth       | 1988        | 1.06<br>(0.98–1.14) |
| Wandsworth       | 1989        | 1.04<br>(0.95–1.13) |
| Wandsworth       | 1990        | 1.02<br>(0.94–1.1)  |
| Wandsworth       | 1991        | 0.99<br>(0.9–1.08)  |
| Wandsworth       | 1992        | 0.95<br>(0.86–1.03) |
| Wandsworth       | 1993        | 0.95<br>(0.86–1.04) |

**Table 15 Ratio of adjusted to unadjusted 5q0 values for scaled locations by year**

| <b>Geography</b> | <b>Year</b> | <b>Ratio</b>        |
|------------------|-------------|---------------------|
| Wandsworth       | 1994        | 0.96<br>(0.88–1.05) |
| Wandsworth       | 1995        | 0.97<br>(0.88–1.07) |
| Wandsworth       | 1996        | 1.01<br>(0.91–1.12) |
| Wandsworth       | 1997        | 0.99<br>(0.9–1.08)  |
| Wandsworth       | 1998        | 1.01<br>(0.92–1.1)  |
| Wandsworth       | 1999        | 1.05<br>(0.96–1.14) |
| Wandsworth       | 2000        | 1.03<br>(0.93–1.15) |
| Wandsworth       | 2001        | 1.05<br>(0.96–1.16) |
| Wandsworth       | 2002        | 1.03<br>(0.94–1.13) |
| Wandsworth       | 2003        | 1.06<br>(0.96–1.17) |
| Wandsworth       | 2004        | 1.02<br>(0.92–1.12) |
| Wandsworth       | 2005        | 1.02<br>(0.92–1.14) |
| Wandsworth       | 2006        | 1.05<br>(0.94–1.16) |
| Wandsworth       | 2007        | 1.03<br>(0.94–1.15) |
| Wandsworth       | 2008        | 1.03<br>(0.93–1.13) |
| Wandsworth       | 2009        | 1.04<br>(0.94–1.15) |
| Wandsworth       | 2010        | 1.05<br>(0.96–1.15) |
| Wandsworth       | 2011        | 1.03<br>(0.93–1.14) |
| Wandsworth       | 2012        | 0.99<br>(0.89–1.1)  |
| Wandsworth       | 2013        | 0.94<br>(0.84–1.05) |
| Wandsworth       | 2014        | 0.9<br>(0.8–1.02)   |
| Wandsworth       | 2015        | 0.91<br>(0.8–1.03)  |
| Wandsworth       | 2016        | 0.91<br>(0.8–1.02)  |
| Wandsworth       | 2017        | 0.95<br>(0.79–1.12) |
| Westminster      | 1950        | 0.57<br>(0.47–0.68) |
| Westminster      | 1951        | 0.66<br>(0.54–0.79) |
| Westminster      | 1952        | 0.62<br>(0.52–0.74) |
| Westminster      | 1953        | 0.63<br>(0.52–0.75) |
| Westminster      | 1954        | 0.6<br>(0.5–0.71)   |
| Westminster      | 1955        | 0.6<br>(0.51–0.71)  |
| Westminster      | 1956        | 0.6<br>(0.5–0.7)    |

**Table 15 Ratio of adjusted to unadjusted 5q0 values for scaled locations by year**

| <b>Geography</b> | <b>Year</b> | <b>Ratio</b>        |
|------------------|-------------|---------------------|
| Westminster      | 1957        | 0.61<br>(0.51–0.72) |
| Westminster      | 1958        | 0.61<br>(0.51–0.72) |
| Westminster      | 1959        | 0.61<br>(0.51–0.73) |
| Westminster      | 1960        | 0.63<br>(0.52–0.75) |
| Westminster      | 1961        | 0.64<br>(0.53–0.77) |
| Westminster      | 1962        | 0.67<br>(0.55–0.8)  |
| Westminster      | 1963        | 0.68<br>(0.57–0.81) |
| Westminster      | 1964        | 0.67<br>(0.55–0.8)  |
| Westminster      | 1965        | 0.66<br>(0.54–0.79) |
| Westminster      | 1966        | 0.69<br>(0.56–0.82) |
| Westminster      | 1967        | 0.68<br>(0.56–0.82) |
| Westminster      | 1968        | 0.72<br>(0.59–0.86) |
| Westminster      | 1969        | 0.74<br>(0.6–0.89)  |
| Westminster      | 1970        | 0.78<br>(0.63–0.94) |
| Westminster      | 1971        | 0.81<br>(0.67–0.97) |
| Westminster      | 1972        | 0.83<br>(0.68–0.98) |
| Westminster      | 1973        | 0.84<br>(0.71–0.98) |
| Westminster      | 1974        | 0.86<br>(0.74–1.01) |
| Westminster      | 1975        | 0.88<br>(0.75–1.02) |
| Westminster      | 1976        | 0.86<br>(0.74–1.0)  |
| Westminster      | 1977        | 0.89<br>(0.77–1.02) |
| Westminster      | 1978        | 0.95<br>(0.83–1.08) |
| Westminster      | 1979        | 0.98<br>(0.87–1.11) |
| Westminster      | 1980        | 0.97<br>(0.88–1.07) |
| Westminster      | 1981        | 0.94<br>(0.85–1.03) |
| Westminster      | 1982        | 0.95<br>(0.87–1.04) |
| Westminster      | 1983        | 0.93<br>(0.85–1.02) |
| Westminster      | 1984        | 0.93<br>(0.86–1.01) |
| Westminster      | 1985        | 0.97<br>(0.89–1.05) |
| Westminster      | 1986        | 0.99<br>(0.92–1.08) |
| Westminster      | 1987        | 1.04<br>(0.96–1.12) |



**Table 15 Ratio of adjusted to unadjusted 5q0 values for scaled locations by year**

| <b>Geography</b>   | <b>Year</b> | <b>Ratio</b>        |
|--------------------|-------------|---------------------|
| Westminster        | 1988        | 1.06<br>(0.98–1.14) |
| Westminster        | 1989        | 1.04<br>(0.95–1.13) |
| Westminster        | 1990        | 1.02<br>(0.94–1.1)  |
| Westminster        | 1991        | 0.99<br>(0.9–1.08)  |
| Westminster        | 1992        | 0.95<br>(0.86–1.03) |
| Westminster        | 1993        | 0.95<br>(0.86–1.04) |
| Westminster        | 1994        | 0.96<br>(0.88–1.05) |
| Westminster        | 1995        | 0.97<br>(0.88–1.07) |
| Westminster        | 1996        | 1.01<br>(0.91–1.12) |
| Westminster        | 1997        | 0.99<br>(0.9–1.08)  |
| Westminster        | 1998        | 1.01<br>(0.92–1.1)  |
| Westminster        | 1999        | 1.05<br>(0.96–1.14) |
| Westminster        | 2000        | 1.03<br>(0.93–1.15) |
| Westminster        | 2001        | 1.05<br>(0.96–1.16) |
| Westminster        | 2002        | 1.03<br>(0.94–1.13) |
| Westminster        | 2003        | 1.06<br>(0.96–1.17) |
| Westminster        | 2004        | 1.02<br>(0.92–1.12) |
| Westminster        | 2005        | 1.02<br>(0.92–1.14) |
| Westminster        | 2006        | 1.05<br>(0.94–1.16) |
| Westminster        | 2007        | 1.03<br>(0.94–1.15) |
| Westminster        | 2008        | 1.03<br>(0.93–1.13) |
| Westminster        | 2009        | 1.04<br>(0.94–1.15) |
| Westminster        | 2010        | 1.05<br>(0.96–1.15) |
| Westminster        | 2011        | 1.03<br>(0.93–1.14) |
| Westminster        | 2012        | 0.99<br>(0.89–1.1)  |
| Westminster        | 2013        | 0.94<br>(0.84–1.05) |
| Westminster        | 2014        | 0.9<br>(0.8–1.02)   |
| Westminster        | 2015        | 0.91<br>(0.8–1.03)  |
| Westminster        | 2016        | 0.91<br>(0.8–1.02)  |
| Westminster        | 2017        | 0.95<br>(0.79–1.12) |
| North East England | 1950        | 0.9<br>(0.74–1.07)  |

**Table 15 Ratio of adjusted to unadjusted 5q0 values for scaled locations by year**

| <b>Geography</b>   | <b>Year</b> | <b>Ratio</b>        |
|--------------------|-------------|---------------------|
| North East England | 1951        | 1.04<br>(0.85–1.25) |
| North East England | 1952        | 0.97<br>(0.8–1.16)  |
| North East England | 1953        | 0.98<br>(0.81–1.17) |
| North East England | 1954        | 0.91<br>(0.75–1.1)  |
| North East England | 1955        | 0.91<br>(0.74–1.11) |
| North East England | 1956        | 0.89<br>(0.73–1.09) |
| North East England | 1957        | 0.9<br>(0.73–1.1)   |
| North East England | 1958        | 0.88<br>(0.71–1.07) |
| North East England | 1959        | 0.87<br>(0.71–1.06) |
| North East England | 1960        | 0.88<br>(0.71–1.06) |
| North East England | 1961        | 0.89<br>(0.73–1.07) |
| North East England | 1962        | 0.91<br>(0.74–1.09) |
| North East England | 1963        | 0.91<br>(0.75–1.09) |
| North East England | 1964        | 0.88<br>(0.72–1.05) |
| North East England | 1965        | 0.85<br>(0.69–1.02) |
| North East England | 1966        | 0.87<br>(0.71–1.04) |
| North East England | 1967        | 0.85<br>(0.69–1.02) |
| North East England | 1968        | 0.88<br>(0.72–1.05) |
| North East England | 1969        | 0.89<br>(0.73–1.06) |
| North East England | 1970        | 0.91<br>(0.76–1.08) |
| North East England | 1971        | 0.93<br>(0.78–1.1)  |
| North East England | 1972        | 0.93<br>(0.78–1.11) |
| North East England | 1973        | 0.93<br>(0.78–1.12) |
| North East England | 1974        | 0.94<br>(0.79–1.11) |
| North East England | 1975        | 0.93<br>(0.79–1.1)  |
| North East England | 1976        | 0.9<br>(0.77–1.04)  |
| North East England | 1977        | 0.92<br>(0.8–1.04)  |
| North East England | 1978        | 0.96<br>(0.85–1.08) |
| North East England | 1979        | 0.98<br>(0.9–1.08)  |
| North East England | 1980        | 0.97<br>(0.9–1.04)  |
| North East England | 1981        | 0.93<br>(0.89–0.97) |

**Table 15 Ratio of adjusted to unadjusted 5q0 values for scaled locations by year**

| <b>Geography</b>   | <b>Year</b> | <b>Ratio</b>        |
|--------------------|-------------|---------------------|
| North East England | 1982        | 0.98<br>(0.95–1.01) |
| North East England | 1983        | 1.0<br>(0.97–1.03)  |
| North East England | 1984        | 0.98<br>(0.95–1.01) |
| North East England | 1985        | 0.99<br>(0.95–1.02) |
| North East England | 1986        | 0.99<br>(0.97–1.02) |
| North East England | 1987        | 0.99<br>(0.96–1.01) |
| North East England | 1988        | 1.0<br>(0.97–1.03)  |
| North East England | 1989        | 0.99<br>(0.97–1.01) |
| North East England | 1990        | 1.0<br>(0.98–1.02)  |
| North East England | 1991        | 1.0<br>(0.98–1.02)  |
| North East England | 1992        | 0.97<br>(0.95–1.0)  |
| North East England | 1993        | 1.0<br>(0.97–1.02)  |
| North East England | 1994        | 1.01<br>(0.98–1.04) |
| North East England | 1995        | 1.02<br>(0.99–1.05) |
| North East England | 1996        | 1.04<br>(1.01–1.06) |
| North East England | 1997        | 1.01<br>(0.97–1.05) |
| North East England | 1998        | 1.0<br>(0.96–1.03)  |
| North East England | 1999        | 1.02<br>(0.99–1.06) |
| North East England | 2000        | 1.01<br>(0.95–1.09) |
| North East England | 2001        | 1.0<br>(0.96–1.04)  |
| North East England | 2002        | 0.98<br>(0.95–1.02) |
| North East England | 2003        | 1.02<br>(0.98–1.06) |
| North East England | 2004        | 0.99<br>(0.96–1.02) |
| North East England | 2005        | 0.99<br>(0.95–1.03) |
| North East England | 2006        | 1.01<br>(0.97–1.05) |
| North East England | 2007        | 1.01<br>(0.98–1.05) |
| North East England | 2008        | 1.01<br>(0.98–1.04) |
| North East England | 2009        | 1.0<br>(0.96–1.04)  |
| North East England | 2010        | 0.98<br>(0.95–1.02) |
| North East England | 2011        | 1.0<br>(0.96–1.04)  |
| North East England | 2012        | 1.0<br>(0.96–1.04)  |

**Table 15 Ratio of adjusted to unadjusted 5q0 values for scaled locations by year**

| <b>Geography</b>   | <b>Year</b> | <b>Ratio</b>        |
|--------------------|-------------|---------------------|
| North East England | 2013        | 0.99<br>(0.95–1.02) |
| North East England | 2014        | 0.99<br>(0.95–1.03) |
| North East England | 2015        | 1.0<br>(0.96–1.04)  |
| North East England | 2016        | 1.0<br>(0.94–1.05)  |
| North East England | 2017        | 1.02<br>(0.92–1.14) |
| County Durham      | 1950        | 0.76<br>(0.63–0.91) |
| County Durham      | 1951        | 0.88<br>(0.72–1.05) |
| County Durham      | 1952        | 0.82<br>(0.67–0.99) |
| County Durham      | 1953        | 0.83<br>(0.67–0.99) |
| County Durham      | 1954        | 0.78<br>(0.63–0.93) |
| County Durham      | 1955        | 0.78<br>(0.63–0.93) |
| County Durham      | 1956        | 0.76<br>(0.63–0.91) |
| County Durham      | 1957        | 0.77<br>(0.65–0.9)  |
| County Durham      | 1958        | 0.76<br>(0.65–0.87) |
| County Durham      | 1959        | 0.76<br>(0.65–0.88) |
| County Durham      | 1960        | 0.77<br>(0.65–0.91) |
| County Durham      | 1961        | 0.79<br>(0.66–0.93) |
| County Durham      | 1962        | 0.81<br>(0.67–0.96) |
| County Durham      | 1963        | 0.81<br>(0.68–0.97) |
| County Durham      | 1964        | 0.79<br>(0.66–0.94) |
| County Durham      | 1965        | 0.78<br>(0.64–0.93) |
| County Durham      | 1966        | 0.8<br>(0.65–0.95)  |
| County Durham      | 1967        | 0.79<br>(0.63–0.95) |
| County Durham      | 1968        | 0.82<br>(0.66–1.0)  |
| County Durham      | 1969        | 0.83<br>(0.67–1.02) |
| County Durham      | 1970        | 0.87<br>(0.71–1.05) |
| County Durham      | 1971        | 0.89<br>(0.74–1.07) |
| County Durham      | 1972        | 0.9<br>(0.75–1.06)  |
| County Durham      | 1973        | 0.9<br>(0.76–1.06)  |
| County Durham      | 1974        | 0.91<br>(0.78–1.06) |
| County Durham      | 1975        | 0.91<br>(0.77–1.07) |

**Table 15 Ratio of adjusted to unadjusted 5q0 values for scaled locations by year**

| <b>Geography</b> | <b>Year</b> | <b>Ratio</b>        |
|------------------|-------------|---------------------|
| County Durham    | 1976        | 0.88<br>(0.73–1.04) |
| County Durham    | 1977        | 0.9<br>(0.75–1.07)  |
| County Durham    | 1978        | 0.94<br>(0.79–1.11) |
| County Durham    | 1979        | 0.96<br>(0.83–1.12) |
| County Durham    | 1980        | 0.94<br>(0.83–1.08) |
| County Durham    | 1981        | 0.9<br>(0.81–1.0)   |
| County Durham    | 1982        | 0.93<br>(0.85–1.02) |
| County Durham    | 1983        | 0.96<br>(0.88–1.05) |
| County Durham    | 1984        | 0.94<br>(0.87–1.03) |
| County Durham    | 1985        | 0.95<br>(0.87–1.04) |
| County Durham    | 1986        | 0.98<br>(0.9–1.06)  |
| County Durham    | 1987        | 0.97<br>(0.89–1.06) |
| County Durham    | 1988        | 1.0<br>(0.91–1.08)  |
| County Durham    | 1989        | 1.0<br>(0.92–1.09)  |
| County Durham    | 1990        | 1.02<br>(0.93–1.1)  |
| County Durham    | 1991        | 1.02<br>(0.94–1.12) |
| County Durham    | 1992        | 0.97<br>(0.89–1.07) |
| County Durham    | 1993        | 0.98<br>(0.89–1.07) |
| County Durham    | 1994        | 0.98<br>(0.88–1.07) |
| County Durham    | 1995        | 0.98<br>(0.88–1.08) |
| County Durham    | 1996        | 1.0<br>(0.89–1.11)  |
| County Durham    | 1997        | 0.97<br>(0.87–1.08) |
| County Durham    | 1998        | 0.97<br>(0.86–1.07) |
| County Durham    | 1999        | 1.0<br>(0.9–1.11)   |
| County Durham    | 2000        | 1.01<br>(0.9–1.14)  |
| County Durham    | 2001        | 1.01<br>(0.9–1.12)  |
| County Durham    | 2002        | 0.99<br>(0.89–1.11) |
| County Durham    | 2003        | 1.03<br>(0.92–1.16) |
| County Durham    | 2004        | 1.01<br>(0.9–1.14)  |
| County Durham    | 2005        | 1.01<br>(0.9–1.13)  |
| County Durham    | 2006        | 1.04<br>(0.92–1.17) |

**Table 15 Ratio of adjusted to unadjusted 5q0 values for scaled locations by year**

| <b>Geography</b> | <b>Year</b> | <b>Ratio</b>        |
|------------------|-------------|---------------------|
| County Durham    | 2007        | 1.03<br>(0.91–1.17) |
| County Durham    | 2008        | 1.01<br>(0.89–1.16) |
| County Durham    | 2009        | 0.99<br>(0.88–1.12) |
| County Durham    | 2010        | 0.96<br>(0.86–1.08) |
| County Durham    | 2011        | 0.97<br>(0.86–1.09) |
| County Durham    | 2012        | 0.96<br>(0.86–1.09) |
| County Durham    | 2013        | 0.95<br>(0.83–1.09) |
| County Durham    | 2014        | 0.97<br>(0.84–1.11) |
| County Durham    | 2015        | 0.98<br>(0.84–1.13) |
| County Durham    | 2016        | 0.97<br>(0.84–1.11) |
| County Durham    | 2017        | 1.0<br>(0.82–1.21)  |
| Darlington       | 1950        | 0.76<br>(0.63–0.91) |
| Darlington       | 1951        | 0.88<br>(0.72–1.05) |
| Darlington       | 1952        | 0.82<br>(0.67–0.99) |
| Darlington       | 1953        | 0.83<br>(0.67–0.99) |
| Darlington       | 1954        | 0.78<br>(0.63–0.93) |
| Darlington       | 1955        | 0.78<br>(0.63–0.93) |
| Darlington       | 1956        | 0.76<br>(0.63–0.91) |
| Darlington       | 1957        | 0.77<br>(0.65–0.9)  |
| Darlington       | 1958        | 0.76<br>(0.65–0.87) |
| Darlington       | 1959        | 0.76<br>(0.65–0.88) |
| Darlington       | 1960        | 0.77<br>(0.65–0.91) |
| Darlington       | 1961        | 0.79<br>(0.66–0.93) |
| Darlington       | 1962        | 0.81<br>(0.67–0.96) |
| Darlington       | 1963        | 0.81<br>(0.68–0.97) |
| Darlington       | 1964        | 0.79<br>(0.66–0.94) |
| Darlington       | 1965        | 0.78<br>(0.64–0.93) |
| Darlington       | 1966        | 0.8<br>(0.65–0.95)  |
| Darlington       | 1967        | 0.79<br>(0.63–0.95) |
| Darlington       | 1968        | 0.82<br>(0.66–1.0)  |
| Darlington       | 1969        | 0.83<br>(0.67–1.02) |

**Table 15 Ratio of adjusted to unadjusted 5q0 values for scaled locations by year**

| <b>Geography</b> | <b>Year</b> | <b>Ratio</b>        |
|------------------|-------------|---------------------|
| Darlington       | 1970        | 0.87<br>(0.71–1.05) |
| Darlington       | 1971        | 0.89<br>(0.74–1.07) |
| Darlington       | 1972        | 0.9<br>(0.75–1.06)  |
| Darlington       | 1973        | 0.9<br>(0.76–1.06)  |
| Darlington       | 1974        | 0.91<br>(0.78–1.06) |
| Darlington       | 1975        | 0.91<br>(0.77–1.07) |
| Darlington       | 1976        | 0.88<br>(0.73–1.04) |
| Darlington       | 1977        | 0.9<br>(0.75–1.07)  |
| Darlington       | 1978        | 0.94<br>(0.79–1.11) |
| Darlington       | 1979        | 0.96<br>(0.83–1.12) |
| Darlington       | 1980        | 0.94<br>(0.83–1.08) |
| Darlington       | 1981        | 0.9<br>(0.81–1.0)   |
| Darlington       | 1982        | 0.93<br>(0.85–1.02) |
| Darlington       | 1983        | 0.96<br>(0.88–1.05) |
| Darlington       | 1984        | 0.94<br>(0.87–1.03) |
| Darlington       | 1985        | 0.95<br>(0.87–1.04) |
| Darlington       | 1986        | 0.98<br>(0.9–1.06)  |
| Darlington       | 1987        | 0.97<br>(0.89–1.06) |
| Darlington       | 1988        | 1.0<br>(0.91–1.08)  |
| Darlington       | 1989        | 1.0<br>(0.92–1.09)  |
| Darlington       | 1990        | 1.02<br>(0.93–1.1)  |
| Darlington       | 1991        | 1.02<br>(0.94–1.12) |
| Darlington       | 1992        | 0.97<br>(0.89–1.07) |
| Darlington       | 1993        | 0.98<br>(0.89–1.07) |
| Darlington       | 1994        | 0.98<br>(0.88–1.07) |
| Darlington       | 1995        | 0.98<br>(0.88–1.08) |
| Darlington       | 1996        | 1.0<br>(0.89–1.11)  |
| Darlington       | 1997        | 0.97<br>(0.87–1.08) |
| Darlington       | 1998        | 0.97<br>(0.86–1.07) |
| Darlington       | 1999        | 1.0<br>(0.9–1.11)   |
| Darlington       | 2000        | 1.01<br>(0.9–1.14)  |

**Table 15 Ratio of adjusted to unadjusted 5q0 values for scaled locations by year**

| <b>Geography</b> | <b>Year</b> | <b>Ratio</b>        |
|------------------|-------------|---------------------|
| Darlington       | 2001        | 1.01<br>(0.9–1.12)  |
| Darlington       | 2002        | 0.99<br>(0.89–1.11) |
| Darlington       | 2003        | 1.03<br>(0.92–1.16) |
| Darlington       | 2004        | 1.01<br>(0.9–1.14)  |
| Darlington       | 2005        | 1.01<br>(0.9–1.13)  |
| Darlington       | 2006        | 1.04<br>(0.92–1.17) |
| Darlington       | 2007        | 1.03<br>(0.91–1.17) |
| Darlington       | 2008        | 1.01<br>(0.89–1.16) |
| Darlington       | 2009        | 0.99<br>(0.88–1.12) |
| Darlington       | 2010        | 0.96<br>(0.86–1.08) |
| Darlington       | 2011        | 0.97<br>(0.86–1.09) |
| Darlington       | 2012        | 0.96<br>(0.86–1.09) |
| Darlington       | 2013        | 0.95<br>(0.83–1.09) |
| Darlington       | 2014        | 0.97<br>(0.84–1.11) |
| Darlington       | 2015        | 0.98<br>(0.84–1.13) |
| Darlington       | 2016        | 0.97<br>(0.84–1.11) |
| Darlington       | 2017        | 1.0<br>(0.82–1.21)  |
| Gateshead        | 1950        | 0.76<br>(0.63–0.91) |
| Gateshead        | 1951        | 0.88<br>(0.72–1.05) |
| Gateshead        | 1952        | 0.82<br>(0.67–0.99) |
| Gateshead        | 1953        | 0.83<br>(0.67–0.99) |
| Gateshead        | 1954        | 0.78<br>(0.63–0.93) |
| Gateshead        | 1955        | 0.78<br>(0.63–0.93) |
| Gateshead        | 1956        | 0.76<br>(0.63–0.91) |
| Gateshead        | 1957        | 0.77<br>(0.65–0.9)  |
| Gateshead        | 1958        | 0.76<br>(0.65–0.87) |
| Gateshead        | 1959        | 0.76<br>(0.65–0.88) |
| Gateshead        | 1960        | 0.77<br>(0.65–0.91) |
| Gateshead        | 1961        | 0.79<br>(0.66–0.93) |
| Gateshead        | 1962        | 0.81<br>(0.67–0.96) |
| Gateshead        | 1963        | 0.81<br>(0.68–0.97) |



**Table 15 Ratio of adjusted to unadjusted 5q0 values for scaled locations by year**

| <b>Geography</b> | <b>Year</b> | <b>Ratio</b>        |
|------------------|-------------|---------------------|
| Gateshead        | 1964        | 0.79<br>(0.66–0.94) |
| Gateshead        | 1965        | 0.78<br>(0.64–0.93) |
| Gateshead        | 1966        | 0.8<br>(0.65–0.95)  |
| Gateshead        | 1967        | 0.79<br>(0.63–0.95) |
| Gateshead        | 1968        | 0.82<br>(0.66–1.0)  |
| Gateshead        | 1969        | 0.83<br>(0.67–1.02) |
| Gateshead        | 1970        | 0.87<br>(0.71–1.05) |
| Gateshead        | 1971        | 0.89<br>(0.74–1.07) |
| Gateshead        | 1972        | 0.9<br>(0.75–1.06)  |
| Gateshead        | 1973        | 0.9<br>(0.76–1.06)  |
| Gateshead        | 1974        | 0.91<br>(0.78–1.06) |
| Gateshead        | 1975        | 0.91<br>(0.77–1.07) |
| Gateshead        | 1976        | 0.88<br>(0.73–1.04) |
| Gateshead        | 1977        | 0.9<br>(0.75–1.07)  |
| Gateshead        | 1978        | 0.94<br>(0.79–1.11) |
| Gateshead        | 1979        | 0.96<br>(0.83–1.12) |
| Gateshead        | 1980        | 0.94<br>(0.83–1.08) |
| Gateshead        | 1981        | 0.9<br>(0.81–1.0)   |
| Gateshead        | 1982        | 0.93<br>(0.85–1.02) |
| Gateshead        | 1983        | 0.96<br>(0.88–1.05) |
| Gateshead        | 1984        | 0.94<br>(0.87–1.03) |
| Gateshead        | 1985        | 0.95<br>(0.87–1.04) |
| Gateshead        | 1986        | 0.98<br>(0.9–1.06)  |
| Gateshead        | 1987        | 0.97<br>(0.89–1.06) |
| Gateshead        | 1988        | 1.0<br>(0.91–1.08)  |
| Gateshead        | 1989        | 1.0<br>(0.92–1.09)  |
| Gateshead        | 1990        | 1.02<br>(0.93–1.1)  |
| Gateshead        | 1991        | 1.02<br>(0.94–1.12) |
| Gateshead        | 1992        | 0.97<br>(0.89–1.07) |
| Gateshead        | 1993        | 0.98<br>(0.89–1.07) |
| Gateshead        | 1994        | 0.98<br>(0.88–1.07) |

**Table 15 Ratio of adjusted to unadjusted 5q0 values for scaled locations by year**

| <b>Geography</b> | <b>Year</b> | <b>Ratio</b>        |
|------------------|-------------|---------------------|
| Gateshead        | 1995        | 0.98<br>(0.88–1.08) |
| Gateshead        | 1996        | 1.0<br>(0.89–1.11)  |
| Gateshead        | 1997        | 0.97<br>(0.87–1.08) |
| Gateshead        | 1998        | 0.97<br>(0.86–1.07) |
| Gateshead        | 1999        | 1.0<br>(0.9–1.11)   |
| Gateshead        | 2000        | 1.01<br>(0.9–1.14)  |
| Gateshead        | 2001        | 1.01<br>(0.9–1.12)  |
| Gateshead        | 2002        | 0.99<br>(0.89–1.11) |
| Gateshead        | 2003        | 1.03<br>(0.92–1.16) |
| Gateshead        | 2004        | 1.01<br>(0.9–1.14)  |
| Gateshead        | 2005        | 1.01<br>(0.9–1.13)  |
| Gateshead        | 2006        | 1.04<br>(0.92–1.17) |
| Gateshead        | 2007        | 1.03<br>(0.91–1.17) |
| Gateshead        | 2008        | 1.01<br>(0.89–1.16) |
| Gateshead        | 2009        | 0.99<br>(0.88–1.12) |
| Gateshead        | 2010        | 0.96<br>(0.86–1.08) |
| Gateshead        | 2011        | 0.97<br>(0.86–1.09) |
| Gateshead        | 2012        | 0.96<br>(0.86–1.09) |
| Gateshead        | 2013        | 0.95<br>(0.83–1.09) |
| Gateshead        | 2014        | 0.97<br>(0.84–1.11) |
| Gateshead        | 2015        | 0.98<br>(0.84–1.13) |
| Gateshead        | 2016        | 0.97<br>(0.84–1.11) |
| Gateshead        | 2017        | 1.0<br>(0.82–1.21)  |
| Hartlepool       | 1950        | 0.76<br>(0.63–0.91) |
| Hartlepool       | 1951        | 0.88<br>(0.72–1.05) |
| Hartlepool       | 1952        | 0.82<br>(0.68–0.99) |
| Hartlepool       | 1953        | 0.83<br>(0.67–0.99) |
| Hartlepool       | 1954        | 0.78<br>(0.63–0.93) |
| Hartlepool       | 1955        | 0.78<br>(0.63–0.93) |
| Hartlepool       | 1956        | 0.76<br>(0.63–0.91) |
| Hartlepool       | 1957        | 0.77<br>(0.65–0.9)  |

**Table 15 Ratio of adjusted to unadjusted 5q0 values for scaled locations by year**

| <b>Geography</b> | <b>Year</b> | <b>Ratio</b>        |
|------------------|-------------|---------------------|
| Hartlepool       | 1958        | 0.76<br>(0.65–0.87) |
| Hartlepool       | 1959        | 0.76<br>(0.65–0.88) |
| Hartlepool       | 1960        | 0.77<br>(0.65–0.91) |
| Hartlepool       | 1961        | 0.79<br>(0.66–0.93) |
| Hartlepool       | 1962        | 0.81<br>(0.67–0.96) |
| Hartlepool       | 1963        | 0.81<br>(0.68–0.97) |
| Hartlepool       | 1964        | 0.79<br>(0.66–0.94) |
| Hartlepool       | 1965        | 0.78<br>(0.64–0.93) |
| Hartlepool       | 1966        | 0.8<br>(0.65–0.95)  |
| Hartlepool       | 1967        | 0.79<br>(0.63–0.95) |
| Hartlepool       | 1968        | 0.82<br>(0.66–1.0)  |
| Hartlepool       | 1969        | 0.84<br>(0.68–1.02) |
| Hartlepool       | 1970        | 0.87<br>(0.71–1.05) |
| Hartlepool       | 1971        | 0.89<br>(0.74–1.07) |
| Hartlepool       | 1972        | 0.9<br>(0.75–1.06)  |
| Hartlepool       | 1973        | 0.9<br>(0.76–1.06)  |
| Hartlepool       | 1974        | 0.91<br>(0.78–1.06) |
| Hartlepool       | 1975        | 0.91<br>(0.77–1.07) |
| Hartlepool       | 1976        | 0.88<br>(0.73–1.04) |
| Hartlepool       | 1977        | 0.9<br>(0.75–1.07)  |
| Hartlepool       | 1978        | 0.94<br>(0.79–1.11) |
| Hartlepool       | 1979        | 0.96<br>(0.83–1.12) |
| Hartlepool       | 1980        | 0.94<br>(0.83–1.08) |
| Hartlepool       | 1981        | 0.9<br>(0.81–1.0)   |
| Hartlepool       | 1982        | 0.93<br>(0.85–1.02) |
| Hartlepool       | 1983        | 0.96<br>(0.88–1.05) |
| Hartlepool       | 1984        | 0.94<br>(0.87–1.03) |
| Hartlepool       | 1985        | 0.95<br>(0.87–1.04) |
| Hartlepool       | 1986        | 0.98<br>(0.9–1.06)  |
| Hartlepool       | 1987        | 0.97<br>(0.89–1.06) |
| Hartlepool       | 1988        | 1.0<br>(0.91–1.08)  |

**Table 15 Ratio of adjusted to unadjusted 5q0 values for scaled locations by year**

| <b>Geography</b> | <b>Year</b> | <b>Ratio</b>        |
|------------------|-------------|---------------------|
| Hartlepool       | 1989        | 1.0<br>(0.92–1.09)  |
| Hartlepool       | 1990        | 1.02<br>(0.93–1.1)  |
| Hartlepool       | 1991        | 1.02<br>(0.94–1.12) |
| Hartlepool       | 1992        | 0.97<br>(0.89–1.07) |
| Hartlepool       | 1993        | 0.98<br>(0.89–1.07) |
| Hartlepool       | 1994        | 0.98<br>(0.88–1.07) |
| Hartlepool       | 1995        | 0.98<br>(0.88–1.08) |
| Hartlepool       | 1996        | 1.0<br>(0.89–1.11)  |
| Hartlepool       | 1997        | 0.97<br>(0.87–1.08) |
| Hartlepool       | 1998        | 0.97<br>(0.86–1.07) |
| Hartlepool       | 1999        | 1.0<br>(0.9–1.11)   |
| Hartlepool       | 2000        | 1.01<br>(0.9–1.14)  |
| Hartlepool       | 2001        | 1.01<br>(0.9–1.12)  |
| Hartlepool       | 2002        | 0.99<br>(0.89–1.11) |
| Hartlepool       | 2003        | 1.03<br>(0.92–1.16) |
| Hartlepool       | 2004        | 1.01<br>(0.9–1.14)  |
| Hartlepool       | 2005        | 1.01<br>(0.9–1.13)  |
| Hartlepool       | 2006        | 1.04<br>(0.92–1.17) |
| Hartlepool       | 2007        | 1.03<br>(0.91–1.17) |
| Hartlepool       | 2008        | 1.01<br>(0.89–1.16) |
| Hartlepool       | 2009        | 0.99<br>(0.88–1.12) |
| Hartlepool       | 2010        | 0.96<br>(0.86–1.08) |
| Hartlepool       | 2011        | 0.97<br>(0.86–1.09) |
| Hartlepool       | 2012        | 0.96<br>(0.86–1.09) |
| Hartlepool       | 2013        | 0.95<br>(0.83–1.09) |
| Hartlepool       | 2014        | 0.97<br>(0.84–1.11) |
| Hartlepool       | 2015        | 0.98<br>(0.84–1.13) |
| Hartlepool       | 2016        | 0.97<br>(0.84–1.11) |
| Hartlepool       | 2017        | 1.0<br>(0.82–1.21)  |
| Middlesbrough    | 1950        | 0.76<br>(0.63–0.91) |
| Middlesbrough    | 1951        | 0.88<br>(0.72–1.05) |

**Table 15 Ratio of adjusted to unadjusted 5q0 values for scaled locations by year**

| <b>Geography</b> | <b>Year</b> | <b>Ratio</b>        |
|------------------|-------------|---------------------|
| Middlesbrough    | 1952        | 0.82<br>(0.67–0.99) |
| Middlesbrough    | 1953        | 0.83<br>(0.67–0.99) |
| Middlesbrough    | 1954        | 0.78<br>(0.63–0.93) |
| Middlesbrough    | 1955        | 0.78<br>(0.63–0.93) |
| Middlesbrough    | 1956        | 0.76<br>(0.63–0.91) |
| Middlesbrough    | 1957        | 0.77<br>(0.65–0.9)  |
| Middlesbrough    | 1958        | 0.76<br>(0.65–0.87) |
| Middlesbrough    | 1959        | 0.76<br>(0.65–0.88) |
| Middlesbrough    | 1960        | 0.77<br>(0.65–0.91) |
| Middlesbrough    | 1961        | 0.79<br>(0.66–0.93) |
| Middlesbrough    | 1962        | 0.81<br>(0.67–0.96) |
| Middlesbrough    | 1963        | 0.81<br>(0.68–0.97) |
| Middlesbrough    | 1964        | 0.79<br>(0.66–0.94) |
| Middlesbrough    | 1965        | 0.78<br>(0.64–0.93) |
| Middlesbrough    | 1966        | 0.8<br>(0.65–0.95)  |
| Middlesbrough    | 1967        | 0.79<br>(0.63–0.95) |
| Middlesbrough    | 1968        | 0.82<br>(0.66–1.0)  |
| Middlesbrough    | 1969        | 0.84<br>(0.67–1.02) |
| Middlesbrough    | 1970        | 0.87<br>(0.71–1.05) |
| Middlesbrough    | 1971        | 0.89<br>(0.74–1.07) |
| Middlesbrough    | 1972        | 0.9<br>(0.75–1.06)  |
| Middlesbrough    | 1973        | 0.9<br>(0.76–1.06)  |
| Middlesbrough    | 1974        | 0.91<br>(0.78–1.06) |
| Middlesbrough    | 1975        | 0.91<br>(0.77–1.07) |
| Middlesbrough    | 1976        | 0.88<br>(0.73–1.04) |
| Middlesbrough    | 1977        | 0.9<br>(0.75–1.07)  |
| Middlesbrough    | 1978        | 0.94<br>(0.79–1.11) |
| Middlesbrough    | 1979        | 0.96<br>(0.83–1.12) |
| Middlesbrough    | 1980        | 0.94<br>(0.83–1.08) |
| Middlesbrough    | 1981        | 0.9<br>(0.81–1.0)   |
| Middlesbrough    | 1982        | 0.93<br>(0.85–1.02) |

**Table 15 Ratio of adjusted to unadjusted 5q0 values for scaled locations by year**

| <b>Geography</b> | <b>Year</b> | <b>Ratio</b>        |
|------------------|-------------|---------------------|
| Middlesbrough    | 1983        | 0.96<br>(0.88–1.05) |
| Middlesbrough    | 1984        | 0.94<br>(0.87–1.03) |
| Middlesbrough    | 1985        | 0.95<br>(0.87–1.04) |
| Middlesbrough    | 1986        | 0.98<br>(0.9–1.06)  |
| Middlesbrough    | 1987        | 0.97<br>(0.89–1.06) |
| Middlesbrough    | 1988        | 1.0<br>(0.91–1.08)  |
| Middlesbrough    | 1989        | 1.0<br>(0.92–1.09)  |
| Middlesbrough    | 1990        | 1.02<br>(0.93–1.1)  |
| Middlesbrough    | 1991        | 1.02<br>(0.94–1.12) |
| Middlesbrough    | 1992        | 0.97<br>(0.89–1.07) |
| Middlesbrough    | 1993        | 0.98<br>(0.89–1.07) |
| Middlesbrough    | 1994        | 0.98<br>(0.88–1.07) |
| Middlesbrough    | 1995        | 0.98<br>(0.88–1.08) |
| Middlesbrough    | 1996        | 1.0<br>(0.89–1.11)  |
| Middlesbrough    | 1997        | 0.97<br>(0.87–1.08) |
| Middlesbrough    | 1998        | 0.97<br>(0.86–1.07) |
| Middlesbrough    | 1999        | 1.0<br>(0.9–1.11)   |
| Middlesbrough    | 2000        | 1.01<br>(0.9–1.14)  |
| Middlesbrough    | 2001        | 1.01<br>(0.9–1.12)  |
| Middlesbrough    | 2002        | 0.99<br>(0.89–1.11) |
| Middlesbrough    | 2003        | 1.03<br>(0.92–1.16) |
| Middlesbrough    | 2004        | 1.01<br>(0.9–1.14)  |
| Middlesbrough    | 2005        | 1.01<br>(0.9–1.13)  |
| Middlesbrough    | 2006        | 1.04<br>(0.92–1.17) |
| Middlesbrough    | 2007        | 1.03<br>(0.91–1.17) |
| Middlesbrough    | 2008        | 1.01<br>(0.89–1.16) |
| Middlesbrough    | 2009        | 0.99<br>(0.88–1.12) |
| Middlesbrough    | 2010        | 0.96<br>(0.86–1.08) |
| Middlesbrough    | 2011        | 0.97<br>(0.86–1.09) |
| Middlesbrough    | 2012        | 0.96<br>(0.86–1.09) |
| Middlesbrough    | 2013        | 0.95<br>(0.83–1.09) |

**Table 15 Ratio of adjusted to unadjusted 5q0 values for scaled locations by year**

| <b>Geography</b>    | <b>Year</b> | <b>Ratio</b>        |
|---------------------|-------------|---------------------|
| Middlesbrough       | 2014        | 0.97<br>(0.84–1.11) |
| Middlesbrough       | 2015        | 0.98<br>(0.84–1.13) |
| Middlesbrough       | 2016        | 0.97<br>(0.84–1.11) |
| Middlesbrough       | 2017        | 1.0<br>(0.82–1.21)  |
| Newcastle upon Tyne | 1950        | 0.76<br>(0.63–0.91) |
| Newcastle upon Tyne | 1951        | 0.88<br>(0.72–1.05) |
| Newcastle upon Tyne | 1952        | 0.82<br>(0.67–0.99) |
| Newcastle upon Tyne | 1953        | 0.83<br>(0.67–0.99) |
| Newcastle upon Tyne | 1954        | 0.78<br>(0.63–0.93) |
| Newcastle upon Tyne | 1955        | 0.77<br>(0.63–0.93) |
| Newcastle upon Tyne | 1956        | 0.76<br>(0.63–0.91) |
| Newcastle upon Tyne | 1957        | 0.77<br>(0.65–0.9)  |
| Newcastle upon Tyne | 1958        | 0.76<br>(0.65–0.87) |
| Newcastle upon Tyne | 1959        | 0.76<br>(0.65–0.88) |
| Newcastle upon Tyne | 1960        | 0.77<br>(0.65–0.91) |
| Newcastle upon Tyne | 1961        | 0.78<br>(0.66–0.93) |
| Newcastle upon Tyne | 1962        | 0.81<br>(0.67–0.96) |
| Newcastle upon Tyne | 1963        | 0.81<br>(0.68–0.97) |
| Newcastle upon Tyne | 1964        | 0.79<br>(0.66–0.94) |
| Newcastle upon Tyne | 1965        | 0.78<br>(0.64–0.93) |
| Newcastle upon Tyne | 1966        | 0.8<br>(0.65–0.95)  |
| Newcastle upon Tyne | 1967        | 0.79<br>(0.63–0.95) |
| Newcastle upon Tyne | 1968        | 0.82<br>(0.66–1.0)  |
| Newcastle upon Tyne | 1969        | 0.83<br>(0.67–1.02) |
| Newcastle upon Tyne | 1970        | 0.87<br>(0.71–1.05) |
| Newcastle upon Tyne | 1971        | 0.89<br>(0.74–1.07) |
| Newcastle upon Tyne | 1972        | 0.9<br>(0.75–1.06)  |
| Newcastle upon Tyne | 1973        | 0.9<br>(0.76–1.06)  |
| Newcastle upon Tyne | 1974        | 0.91<br>(0.78–1.06) |
| Newcastle upon Tyne | 1975        | 0.91<br>(0.77–1.07) |
| Newcastle upon Tyne | 1976        | 0.88<br>(0.73–1.04) |

**Table 15 Ratio of adjusted to unadjusted 5q0 values for scaled locations by year**

| <b>Geography</b>    | <b>Year</b> | <b>Ratio</b>        |
|---------------------|-------------|---------------------|
| Newcastle upon Tyne | 1977        | 0.9<br>(0.75–1.07)  |
| Newcastle upon Tyne | 1978        | 0.94<br>(0.79–1.11) |
| Newcastle upon Tyne | 1979        | 0.96<br>(0.83–1.12) |
| Newcastle upon Tyne | 1980        | 0.94<br>(0.83–1.08) |
| Newcastle upon Tyne | 1981        | 0.9<br>(0.81–1.0)   |
| Newcastle upon Tyne | 1982        | 0.93<br>(0.85–1.02) |
| Newcastle upon Tyne | 1983        | 0.96<br>(0.88–1.05) |
| Newcastle upon Tyne | 1984        | 0.94<br>(0.87–1.03) |
| Newcastle upon Tyne | 1985        | 0.95<br>(0.87–1.04) |
| Newcastle upon Tyne | 1986        | 0.98<br>(0.9–1.06)  |
| Newcastle upon Tyne | 1987        | 0.97<br>(0.89–1.06) |
| Newcastle upon Tyne | 1988        | 1.0<br>(0.91–1.08)  |
| Newcastle upon Tyne | 1989        | 1.0<br>(0.92–1.09)  |
| Newcastle upon Tyne | 1990        | 1.02<br>(0.93–1.1)  |
| Newcastle upon Tyne | 1991        | 1.02<br>(0.94–1.12) |
| Newcastle upon Tyne | 1992        | 0.97<br>(0.89–1.07) |
| Newcastle upon Tyne | 1993        | 0.98<br>(0.89–1.07) |
| Newcastle upon Tyne | 1994        | 0.98<br>(0.88–1.07) |
| Newcastle upon Tyne | 1995        | 0.98<br>(0.88–1.08) |
| Newcastle upon Tyne | 1996        | 1.0<br>(0.89–1.11)  |
| Newcastle upon Tyne | 1997        | 0.97<br>(0.87–1.08) |
| Newcastle upon Tyne | 1998        | 0.97<br>(0.86–1.07) |
| Newcastle upon Tyne | 1999        | 1.0<br>(0.9–1.11)   |
| Newcastle upon Tyne | 2000        | 1.01<br>(0.9–1.14)  |
| Newcastle upon Tyne | 2001        | 1.01<br>(0.9–1.12)  |
| Newcastle upon Tyne | 2002        | 0.99<br>(0.89–1.11) |
| Newcastle upon Tyne | 2003        | 1.03<br>(0.92–1.16) |
| Newcastle upon Tyne | 2004        | 1.01<br>(0.9–1.14)  |
| Newcastle upon Tyne | 2005        | 1.01<br>(0.9–1.13)  |
| Newcastle upon Tyne | 2006        | 1.04<br>(0.92–1.17) |
| Newcastle upon Tyne | 2007        | 1.03<br>(0.91–1.17) |



**Table 15 Ratio of adjusted to unadjusted 5q0 values for scaled locations by year**

| <b>Geography</b>    | <b>Year</b> | <b>Ratio</b>        |
|---------------------|-------------|---------------------|
| Newcastle upon Tyne | 2008        | 1.01<br>(0.89–1.16) |
| Newcastle upon Tyne | 2009        | 0.99<br>(0.88–1.12) |
| Newcastle upon Tyne | 2010        | 0.96<br>(0.86–1.08) |
| Newcastle upon Tyne | 2011        | 0.97<br>(0.86–1.09) |
| Newcastle upon Tyne | 2012        | 0.96<br>(0.86–1.09) |
| Newcastle upon Tyne | 2013        | 0.95<br>(0.83–1.09) |
| Newcastle upon Tyne | 2014        | 0.97<br>(0.84–1.11) |
| Newcastle upon Tyne | 2015        | 0.98<br>(0.84–1.13) |
| Newcastle upon Tyne | 2016        | 0.97<br>(0.84–1.11) |
| Newcastle upon Tyne | 2017        | 1.0<br>(0.82–1.21)  |
| North Tyneside      | 1950        | 0.76<br>(0.63–0.91) |
| North Tyneside      | 1951        | 0.88<br>(0.72–1.05) |
| North Tyneside      | 1952        | 0.82<br>(0.67–0.99) |
| North Tyneside      | 1953        | 0.83<br>(0.67–0.99) |
| North Tyneside      | 1954        | 0.78<br>(0.63–0.93) |
| North Tyneside      | 1955        | 0.77<br>(0.63–0.93) |
| North Tyneside      | 1956        | 0.76<br>(0.63–0.91) |
| North Tyneside      | 1957        | 0.77<br>(0.65–0.9)  |
| North Tyneside      | 1958        | 0.76<br>(0.65–0.87) |
| North Tyneside      | 1959        | 0.76<br>(0.65–0.88) |
| North Tyneside      | 1960        | 0.77<br>(0.65–0.91) |
| North Tyneside      | 1961        | 0.78<br>(0.66–0.93) |
| North Tyneside      | 1962        | 0.81<br>(0.67–0.96) |
| North Tyneside      | 1963        | 0.81<br>(0.67–0.97) |
| North Tyneside      | 1964        | 0.79<br>(0.66–0.94) |
| North Tyneside      | 1965        | 0.78<br>(0.64–0.93) |
| North Tyneside      | 1966        | 0.8<br>(0.65–0.95)  |
| North Tyneside      | 1967        | 0.79<br>(0.63–0.95) |
| North Tyneside      | 1968        | 0.82<br>(0.66–1.0)  |
| North Tyneside      | 1969        | 0.83<br>(0.67–1.02) |
| North Tyneside      | 1970        | 0.87<br>(0.71–1.05) |

**Table 15 Ratio of adjusted to unadjusted 5q0 values for scaled locations by year**

| <b>Geography</b> | <b>Year</b> | <b>Ratio</b>        |
|------------------|-------------|---------------------|
| North Tyneside   | 1971        | 0.89<br>(0.74–1.07) |
| North Tyneside   | 1972        | 0.9<br>(0.75–1.06)  |
| North Tyneside   | 1973        | 0.9<br>(0.76–1.06)  |
| North Tyneside   | 1974        | 0.91<br>(0.78–1.06) |
| North Tyneside   | 1975        | 0.91<br>(0.77–1.07) |
| North Tyneside   | 1976        | 0.88<br>(0.73–1.04) |
| North Tyneside   | 1977        | 0.9<br>(0.75–1.07)  |
| North Tyneside   | 1978        | 0.94<br>(0.79–1.11) |
| North Tyneside   | 1979        | 0.96<br>(0.83–1.12) |
| North Tyneside   | 1980        | 0.94<br>(0.83–1.08) |
| North Tyneside   | 1981        | 0.9<br>(0.81–1.0)   |
| North Tyneside   | 1982        | 0.93<br>(0.85–1.02) |
| North Tyneside   | 1983        | 0.96<br>(0.88–1.05) |
| North Tyneside   | 1984        | 0.94<br>(0.87–1.03) |
| North Tyneside   | 1985        | 0.95<br>(0.87–1.04) |
| North Tyneside   | 1986        | 0.98<br>(0.9–1.06)  |
| North Tyneside   | 1987        | 0.97<br>(0.89–1.06) |
| North Tyneside   | 1988        | 1.0<br>(0.91–1.08)  |
| North Tyneside   | 1989        | 1.0<br>(0.92–1.09)  |
| North Tyneside   | 1990        | 1.02<br>(0.93–1.1)  |
| North Tyneside   | 1991        | 1.02<br>(0.94–1.12) |
| North Tyneside   | 1992        | 0.97<br>(0.89–1.07) |
| North Tyneside   | 1993        | 0.98<br>(0.89–1.07) |
| North Tyneside   | 1994        | 0.98<br>(0.88–1.07) |
| North Tyneside   | 1995        | 0.98<br>(0.88–1.08) |
| North Tyneside   | 1996        | 1.0<br>(0.89–1.11)  |
| North Tyneside   | 1997        | 0.97<br>(0.87–1.08) |
| North Tyneside   | 1998        | 0.97<br>(0.86–1.07) |
| North Tyneside   | 1999        | 1.0<br>(0.9–1.11)   |
| North Tyneside   | 2000        | 1.01<br>(0.9–1.14)  |
| North Tyneside   | 2001        | 1.01<br>(0.9–1.12)  |

**Table 15 Ratio of adjusted to unadjusted 5q0 values for scaled locations by year**

| <b>Geography</b> | <b>Year</b> | <b>Ratio</b>        |
|------------------|-------------|---------------------|
| North Tyneside   | 2002        | 0.99<br>(0.89–1.11) |
| North Tyneside   | 2003        | 1.03<br>(0.92–1.16) |
| North Tyneside   | 2004        | 1.01<br>(0.9–1.14)  |
| North Tyneside   | 2005        | 1.01<br>(0.9–1.13)  |
| North Tyneside   | 2006        | 1.04<br>(0.92–1.17) |
| North Tyneside   | 2007        | 1.03<br>(0.91–1.17) |
| North Tyneside   | 2008        | 1.01<br>(0.89–1.16) |
| North Tyneside   | 2009        | 0.99<br>(0.88–1.12) |
| North Tyneside   | 2010        | 0.96<br>(0.86–1.08) |
| North Tyneside   | 2011        | 0.97<br>(0.86–1.09) |
| North Tyneside   | 2012        | 0.96<br>(0.86–1.09) |
| North Tyneside   | 2013        | 0.95<br>(0.83–1.09) |
| North Tyneside   | 2014        | 0.97<br>(0.84–1.11) |
| North Tyneside   | 2015        | 0.98<br>(0.84–1.13) |
| North Tyneside   | 2016        | 0.97<br>(0.84–1.11) |
| North Tyneside   | 2017        | 1.0<br>(0.82–1.21)  |
| Northumberland   | 1950        | 0.76<br>(0.63–0.91) |
| Northumberland   | 1951        | 0.88<br>(0.72–1.05) |
| Northumberland   | 1952        | 0.82<br>(0.67–0.99) |
| Northumberland   | 1953        | 0.83<br>(0.67–0.99) |
| Northumberland   | 1954        | 0.78<br>(0.63–0.93) |
| Northumberland   | 1955        | 0.78<br>(0.63–0.93) |
| Northumberland   | 1956        | 0.76<br>(0.63–0.91) |
| Northumberland   | 1957        | 0.77<br>(0.65–0.9)  |
| Northumberland   | 1958        | 0.76<br>(0.65–0.87) |
| Northumberland   | 1959        | 0.76<br>(0.65–0.88) |
| Northumberland   | 1960        | 0.77<br>(0.65–0.91) |
| Northumberland   | 1961        | 0.79<br>(0.66–0.93) |
| Northumberland   | 1962        | 0.81<br>(0.67–0.96) |
| Northumberland   | 1963        | 0.81<br>(0.68–0.97) |
| Northumberland   | 1964        | 0.79<br>(0.65–0.94) |

**Table 15 Ratio of adjusted to unadjusted 5q0 values for scaled locations by year**

| <b>Geography</b> | <b>Year</b> | <b>Ratio</b>        |
|------------------|-------------|---------------------|
| Northumberland   | 1965        | 0.78<br>(0.64–0.93) |
| Northumberland   | 1966        | 0.8<br>(0.65–0.95)  |
| Northumberland   | 1967        | 0.79<br>(0.63–0.95) |
| Northumberland   | 1968        | 0.82<br>(0.66–1.0)  |
| Northumberland   | 1969        | 0.83<br>(0.67–1.02) |
| Northumberland   | 1970        | 0.87<br>(0.71–1.05) |
| Northumberland   | 1971        | 0.89<br>(0.74–1.07) |
| Northumberland   | 1972        | 0.9<br>(0.75–1.06)  |
| Northumberland   | 1973        | 0.9<br>(0.76–1.06)  |
| Northumberland   | 1974        | 0.91<br>(0.78–1.06) |
| Northumberland   | 1975        | 0.91<br>(0.77–1.07) |
| Northumberland   | 1976        | 0.88<br>(0.73–1.04) |
| Northumberland   | 1977        | 0.9<br>(0.75–1.07)  |
| Northumberland   | 1978        | 0.94<br>(0.79–1.11) |
| Northumberland   | 1979        | 0.96<br>(0.83–1.12) |
| Northumberland   | 1980        | 0.94<br>(0.83–1.08) |
| Northumberland   | 1981        | 0.9<br>(0.81–1.0)   |
| Northumberland   | 1982        | 0.93<br>(0.85–1.02) |
| Northumberland   | 1983        | 0.96<br>(0.88–1.05) |
| Northumberland   | 1984        | 0.94<br>(0.87–1.03) |
| Northumberland   | 1985        | 0.95<br>(0.87–1.04) |
| Northumberland   | 1986        | 0.98<br>(0.9–1.06)  |
| Northumberland   | 1987        | 0.97<br>(0.89–1.06) |
| Northumberland   | 1988        | 1.0<br>(0.91–1.08)  |
| Northumberland   | 1989        | 1.0<br>(0.92–1.09)  |
| Northumberland   | 1990        | 1.02<br>(0.93–1.1)  |
| Northumberland   | 1991        | 1.02<br>(0.94–1.12) |
| Northumberland   | 1992        | 0.97<br>(0.89–1.07) |
| Northumberland   | 1993        | 0.98<br>(0.89–1.07) |
| Northumberland   | 1994        | 0.98<br>(0.88–1.07) |
| Northumberland   | 1995        | 0.98<br>(0.88–1.08) |

**Table 15 Ratio of adjusted to unadjusted 5q0 values for scaled locations by year**

| <b>Geography</b>     | <b>Year</b> | <b>Ratio</b>        |
|----------------------|-------------|---------------------|
| Northumberland       | 1996        | 1.0<br>(0.89–1.11)  |
| Northumberland       | 1997        | 0.97<br>(0.87–1.08) |
| Northumberland       | 1998        | 0.97<br>(0.86–1.07) |
| Northumberland       | 1999        | 1.0<br>(0.9–1.11)   |
| Northumberland       | 2000        | 1.01<br>(0.9–1.14)  |
| Northumberland       | 2001        | 1.01<br>(0.9–1.12)  |
| Northumberland       | 2002        | 0.99<br>(0.89–1.11) |
| Northumberland       | 2003        | 1.03<br>(0.92–1.16) |
| Northumberland       | 2004        | 1.01<br>(0.9–1.14)  |
| Northumberland       | 2005        | 1.01<br>(0.9–1.13)  |
| Northumberland       | 2006        | 1.04<br>(0.92–1.17) |
| Northumberland       | 2007        | 1.03<br>(0.91–1.17) |
| Northumberland       | 2008        | 1.01<br>(0.89–1.16) |
| Northumberland       | 2009        | 0.99<br>(0.88–1.12) |
| Northumberland       | 2010        | 0.96<br>(0.86–1.08) |
| Northumberland       | 2011        | 0.97<br>(0.86–1.09) |
| Northumberland       | 2012        | 0.96<br>(0.86–1.09) |
| Northumberland       | 2013        | 0.95<br>(0.83–1.09) |
| Northumberland       | 2014        | 0.97<br>(0.84–1.11) |
| Northumberland       | 2015        | 0.98<br>(0.84–1.13) |
| Northumberland       | 2016        | 0.97<br>(0.84–1.11) |
| Northumberland       | 2017        | 1.0<br>(0.82–1.21)  |
| Redcar and Cleveland | 1950        | 0.76<br>(0.63–0.91) |
| Redcar and Cleveland | 1951        | 0.88<br>(0.72–1.05) |
| Redcar and Cleveland | 1952        | 0.82<br>(0.67–0.99) |
| Redcar and Cleveland | 1953        | 0.83<br>(0.67–0.99) |
| Redcar and Cleveland | 1954        | 0.78<br>(0.63–0.93) |
| Redcar and Cleveland | 1955        | 0.78<br>(0.63–0.93) |
| Redcar and Cleveland | 1956        | 0.76<br>(0.63–0.91) |
| Redcar and Cleveland | 1957        | 0.77<br>(0.65–0.9)  |
| Redcar and Cleveland | 1958        | 0.76<br>(0.65–0.87) |

**Table 15 Ratio of adjusted to unadjusted 5q0 values for scaled locations by year**

| <b>Geography</b>     | <b>Year</b> | <b>Ratio</b>        |
|----------------------|-------------|---------------------|
| Redcar and Cleveland | 1959        | 0.76<br>(0.65–0.88) |
| Redcar and Cleveland | 1960        | 0.77<br>(0.65–0.91) |
| Redcar and Cleveland | 1961        | 0.79<br>(0.66–0.93) |
| Redcar and Cleveland | 1962        | 0.81<br>(0.67–0.96) |
| Redcar and Cleveland | 1963        | 0.81<br>(0.68–0.97) |
| Redcar and Cleveland | 1964        | 0.79<br>(0.66–0.94) |
| Redcar and Cleveland | 1965        | 0.78<br>(0.64–0.93) |
| Redcar and Cleveland | 1966        | 0.8<br>(0.65–0.95)  |
| Redcar and Cleveland | 1967        | 0.79<br>(0.63–0.95) |
| Redcar and Cleveland | 1968        | 0.82<br>(0.66–1.0)  |
| Redcar and Cleveland | 1969        | 0.83<br>(0.67–1.02) |
| Redcar and Cleveland | 1970        | 0.87<br>(0.71–1.05) |
| Redcar and Cleveland | 1971        | 0.89<br>(0.74–1.07) |
| Redcar and Cleveland | 1972        | 0.9<br>(0.75–1.06)  |
| Redcar and Cleveland | 1973        | 0.9<br>(0.76–1.06)  |
| Redcar and Cleveland | 1974        | 0.91<br>(0.78–1.06) |
| Redcar and Cleveland | 1975        | 0.91<br>(0.77–1.07) |
| Redcar and Cleveland | 1976        | 0.88<br>(0.73–1.04) |
| Redcar and Cleveland | 1977        | 0.9<br>(0.75–1.07)  |
| Redcar and Cleveland | 1978        | 0.94<br>(0.79–1.11) |
| Redcar and Cleveland | 1979        | 0.96<br>(0.83–1.12) |
| Redcar and Cleveland | 1980        | 0.94<br>(0.83–1.08) |
| Redcar and Cleveland | 1981        | 0.9<br>(0.81–1.0)   |
| Redcar and Cleveland | 1982        | 0.93<br>(0.85–1.02) |
| Redcar and Cleveland | 1983        | 0.96<br>(0.88–1.05) |
| Redcar and Cleveland | 1984        | 0.94<br>(0.87–1.03) |
| Redcar and Cleveland | 1985        | 0.95<br>(0.87–1.04) |
| Redcar and Cleveland | 1986        | 0.98<br>(0.9–1.06)  |
| Redcar and Cleveland | 1987        | 0.97<br>(0.89–1.06) |
| Redcar and Cleveland | 1988        | 1.0<br>(0.91–1.08)  |
| Redcar and Cleveland | 1989        | 1.0<br>(0.92–1.09)  |

**Table 15 Ratio of adjusted to unadjusted 5q0 values for scaled locations by year**

| <b>Geography</b>     | <b>Year</b> | <b>Ratio</b>        |
|----------------------|-------------|---------------------|
| Redcar and Cleveland | 1990        | 1.02<br>(0.93–1.1)  |
| Redcar and Cleveland | 1991        | 1.02<br>(0.94–1.12) |
| Redcar and Cleveland | 1992        | 0.97<br>(0.89–1.07) |
| Redcar and Cleveland | 1993        | 0.98<br>(0.89–1.07) |
| Redcar and Cleveland | 1994        | 0.98<br>(0.88–1.07) |
| Redcar and Cleveland | 1995        | 0.98<br>(0.88–1.08) |
| Redcar and Cleveland | 1996        | 1.0<br>(0.89–1.11)  |
| Redcar and Cleveland | 1997        | 0.97<br>(0.87–1.08) |
| Redcar and Cleveland | 1998        | 0.97<br>(0.86–1.07) |
| Redcar and Cleveland | 1999        | 1.0<br>(0.9–1.11)   |
| Redcar and Cleveland | 2000        | 1.01<br>(0.9–1.14)  |
| Redcar and Cleveland | 2001        | 1.01<br>(0.9–1.12)  |
| Redcar and Cleveland | 2002        | 0.99<br>(0.89–1.11) |
| Redcar and Cleveland | 2003        | 1.03<br>(0.92–1.16) |
| Redcar and Cleveland | 2004        | 1.01<br>(0.9–1.14)  |
| Redcar and Cleveland | 2005        | 1.01<br>(0.9–1.13)  |
| Redcar and Cleveland | 2006        | 1.04<br>(0.92–1.17) |
| Redcar and Cleveland | 2007        | 1.03<br>(0.91–1.17) |
| Redcar and Cleveland | 2008        | 1.01<br>(0.89–1.16) |
| Redcar and Cleveland | 2009        | 0.99<br>(0.88–1.12) |
| Redcar and Cleveland | 2010        | 0.96<br>(0.86–1.08) |
| Redcar and Cleveland | 2011        | 0.97<br>(0.86–1.09) |
| Redcar and Cleveland | 2012        | 0.96<br>(0.86–1.09) |
| Redcar and Cleveland | 2013        | 0.95<br>(0.83–1.09) |
| Redcar and Cleveland | 2014        | 0.97<br>(0.84–1.11) |
| Redcar and Cleveland | 2015        | 0.98<br>(0.84–1.13) |
| Redcar and Cleveland | 2016        | 0.97<br>(0.84–1.11) |
| Redcar and Cleveland | 2017        | 1.0<br>(0.82–1.21)  |
| South Tyneside       | 1950        | 0.76<br>(0.63–0.91) |
| South Tyneside       | 1951        | 0.88<br>(0.72–1.05) |
| South Tyneside       | 1952        | 0.82<br>(0.67–0.99) |

**Table 15 Ratio of adjusted to unadjusted 5q0 values for scaled locations by year**

| <b>Geography</b> | <b>Year</b> | <b>Ratio</b>        |
|------------------|-------------|---------------------|
| South Tyneside   | 1953        | 0.83<br>(0.67–0.99) |
| South Tyneside   | 1954        | 0.78<br>(0.63–0.93) |
| South Tyneside   | 1955        | 0.77<br>(0.63–0.93) |
| South Tyneside   | 1956        | 0.76<br>(0.63–0.91) |
| South Tyneside   | 1957        | 0.77<br>(0.65–0.9)  |
| South Tyneside   | 1958        | 0.76<br>(0.65–0.87) |
| South Tyneside   | 1959        | 0.76<br>(0.65–0.88) |
| South Tyneside   | 1960        | 0.77<br>(0.65–0.91) |
| South Tyneside   | 1961        | 0.78<br>(0.66–0.93) |
| South Tyneside   | 1962        | 0.81<br>(0.67–0.96) |
| South Tyneside   | 1963        | 0.81<br>(0.68–0.97) |
| South Tyneside   | 1964        | 0.79<br>(0.65–0.94) |
| South Tyneside   | 1965        | 0.78<br>(0.64–0.93) |
| South Tyneside   | 1966        | 0.8<br>(0.65–0.95)  |
| South Tyneside   | 1967        | 0.79<br>(0.63–0.95) |
| South Tyneside   | 1968        | 0.82<br>(0.66–1.0)  |
| South Tyneside   | 1969        | 0.83<br>(0.67–1.02) |
| South Tyneside   | 1970        | 0.87<br>(0.71–1.05) |
| South Tyneside   | 1971        | 0.89<br>(0.74–1.07) |
| South Tyneside   | 1972        | 0.9<br>(0.75–1.06)  |
| South Tyneside   | 1973        | 0.9<br>(0.76–1.06)  |
| South Tyneside   | 1974        | 0.91<br>(0.78–1.06) |
| South Tyneside   | 1975        | 0.91<br>(0.77–1.07) |
| South Tyneside   | 1976        | 0.88<br>(0.73–1.04) |
| South Tyneside   | 1977        | 0.9<br>(0.75–1.07)  |
| South Tyneside   | 1978        | 0.94<br>(0.79–1.11) |
| South Tyneside   | 1979        | 0.96<br>(0.83–1.12) |
| South Tyneside   | 1980        | 0.94<br>(0.83–1.08) |
| South Tyneside   | 1981        | 0.9<br>(0.81–1.0)   |
| South Tyneside   | 1982        | 0.93<br>(0.85–1.02) |
| South Tyneside   | 1983        | 0.96<br>(0.88–1.05) |



**Table 15 Ratio of adjusted to unadjusted 5q0 values for scaled locations by year**

| <b>Geography</b> | <b>Year</b> | <b>Ratio</b>        |
|------------------|-------------|---------------------|
| South Tyneside   | 1984        | 0.94<br>(0.87–1.03) |
| South Tyneside   | 1985        | 0.95<br>(0.87–1.04) |
| South Tyneside   | 1986        | 0.98<br>(0.9–1.06)  |
| South Tyneside   | 1987        | 0.97<br>(0.89–1.06) |
| South Tyneside   | 1988        | 1.0<br>(0.91–1.08)  |
| South Tyneside   | 1989        | 1.0<br>(0.92–1.09)  |
| South Tyneside   | 1990        | 1.02<br>(0.93–1.1)  |
| South Tyneside   | 1991        | 1.02<br>(0.94–1.12) |
| South Tyneside   | 1992        | 0.97<br>(0.89–1.07) |
| South Tyneside   | 1993        | 0.98<br>(0.89–1.07) |
| South Tyneside   | 1994        | 0.98<br>(0.88–1.07) |
| South Tyneside   | 1995        | 0.98<br>(0.88–1.08) |
| South Tyneside   | 1996        | 1.0<br>(0.89–1.11)  |
| South Tyneside   | 1997        | 0.97<br>(0.87–1.08) |
| South Tyneside   | 1998        | 0.97<br>(0.86–1.07) |
| South Tyneside   | 1999        | 1.0<br>(0.9–1.11)   |
| South Tyneside   | 2000        | 1.01<br>(0.9–1.14)  |
| South Tyneside   | 2001        | 1.01<br>(0.9–1.12)  |
| South Tyneside   | 2002        | 0.99<br>(0.89–1.11) |
| South Tyneside   | 2003        | 1.03<br>(0.92–1.16) |
| South Tyneside   | 2004        | 1.01<br>(0.9–1.14)  |
| South Tyneside   | 2005        | 1.01<br>(0.9–1.13)  |
| South Tyneside   | 2006        | 1.04<br>(0.92–1.17) |
| South Tyneside   | 2007        | 1.03<br>(0.91–1.17) |
| South Tyneside   | 2008        | 1.01<br>(0.89–1.16) |
| South Tyneside   | 2009        | 0.99<br>(0.88–1.12) |
| South Tyneside   | 2010        | 0.96<br>(0.86–1.08) |
| South Tyneside   | 2011        | 0.97<br>(0.86–1.09) |
| South Tyneside   | 2012        | 0.96<br>(0.86–1.09) |
| South Tyneside   | 2013        | 0.95<br>(0.83–1.09) |
| South Tyneside   | 2014        | 0.97<br>(0.84–1.11) |

**Table 15 Ratio of adjusted to unadjusted 5q0 values for scaled locations by year**

| <b>Geography</b> | <b>Year</b> | <b>Ratio</b>        |
|------------------|-------------|---------------------|
| South Tyneside   | 2015        | 0.98<br>(0.84–1.13) |
| South Tyneside   | 2016        | 0.97<br>(0.84–1.11) |
| South Tyneside   | 2017        | 1.0<br>(0.82–1.21)  |
| Stockton-on-Tees | 1950        | 0.76<br>(0.63–0.91) |
| Stockton-on-Tees | 1951        | 0.88<br>(0.72–1.05) |
| Stockton-on-Tees | 1952        | 0.82<br>(0.67–0.99) |
| Stockton-on-Tees | 1953        | 0.83<br>(0.67–0.99) |
| Stockton-on-Tees | 1954        | 0.78<br>(0.63–0.93) |
| Stockton-on-Tees | 1955        | 0.78<br>(0.63–0.93) |
| Stockton-on-Tees | 1956        | 0.76<br>(0.63–0.91) |
| Stockton-on-Tees | 1957        | 0.77<br>(0.65–0.9)  |
| Stockton-on-Tees | 1958        | 0.76<br>(0.65–0.87) |
| Stockton-on-Tees | 1959        | 0.76<br>(0.65–0.88) |
| Stockton-on-Tees | 1960        | 0.77<br>(0.65–0.91) |
| Stockton-on-Tees | 1961        | 0.79<br>(0.66–0.93) |
| Stockton-on-Tees | 1962        | 0.81<br>(0.67–0.96) |
| Stockton-on-Tees | 1963        | 0.81<br>(0.68–0.97) |
| Stockton-on-Tees | 1964        | 0.79<br>(0.66–0.94) |
| Stockton-on-Tees | 1965        | 0.78<br>(0.64–0.93) |
| Stockton-on-Tees | 1966        | 0.8<br>(0.65–0.95)  |
| Stockton-on-Tees | 1967        | 0.79<br>(0.63–0.95) |
| Stockton-on-Tees | 1968        | 0.82<br>(0.66–1.0)  |
| Stockton-on-Tees | 1969        | 0.83<br>(0.67–1.02) |
| Stockton-on-Tees | 1970        | 0.87<br>(0.71–1.05) |
| Stockton-on-Tees | 1971        | 0.89<br>(0.74–1.07) |
| Stockton-on-Tees | 1972        | 0.9<br>(0.75–1.06)  |
| Stockton-on-Tees | 1973        | 0.9<br>(0.76–1.06)  |
| Stockton-on-Tees | 1974        | 0.91<br>(0.78–1.06) |
| Stockton-on-Tees | 1975        | 0.91<br>(0.77–1.07) |
| Stockton-on-Tees | 1976        | 0.88<br>(0.73–1.04) |
| Stockton-on-Tees | 1977        | 0.9<br>(0.75–1.07)  |

**Table 15 Ratio of adjusted to unadjusted 5q0 values for scaled locations by year**

| <b>Geography</b> | <b>Year</b> | <b>Ratio</b>        |
|------------------|-------------|---------------------|
| Stockton-on-Tees | 1978        | 0.94<br>(0.79–1.11) |
| Stockton-on-Tees | 1979        | 0.96<br>(0.83–1.12) |
| Stockton-on-Tees | 1980        | 0.94<br>(0.83–1.08) |
| Stockton-on-Tees | 1981        | 0.9<br>(0.81–1.0)   |
| Stockton-on-Tees | 1982        | 0.93<br>(0.85–1.02) |
| Stockton-on-Tees | 1983        | 0.96<br>(0.88–1.05) |
| Stockton-on-Tees | 1984        | 0.94<br>(0.87–1.03) |
| Stockton-on-Tees | 1985        | 0.95<br>(0.87–1.04) |
| Stockton-on-Tees | 1986        | 0.98<br>(0.9–1.06)  |
| Stockton-on-Tees | 1987        | 0.97<br>(0.89–1.06) |
| Stockton-on-Tees | 1988        | 1.0<br>(0.91–1.08)  |
| Stockton-on-Tees | 1989        | 1.0<br>(0.92–1.09)  |
| Stockton-on-Tees | 1990        | 1.02<br>(0.93–1.1)  |
| Stockton-on-Tees | 1991        | 1.02<br>(0.94–1.12) |
| Stockton-on-Tees | 1992        | 0.97<br>(0.89–1.07) |
| Stockton-on-Tees | 1993        | 0.98<br>(0.89–1.07) |
| Stockton-on-Tees | 1994        | 0.98<br>(0.88–1.07) |
| Stockton-on-Tees | 1995        | 0.98<br>(0.88–1.08) |
| Stockton-on-Tees | 1996        | 1.0<br>(0.89–1.11)  |
| Stockton-on-Tees | 1997        | 0.97<br>(0.87–1.08) |
| Stockton-on-Tees | 1998        | 0.97<br>(0.86–1.07) |
| Stockton-on-Tees | 1999        | 1.0<br>(0.9–1.11)   |
| Stockton-on-Tees | 2000        | 1.01<br>(0.9–1.14)  |
| Stockton-on-Tees | 2001        | 1.01<br>(0.9–1.12)  |
| Stockton-on-Tees | 2002        | 0.99<br>(0.89–1.11) |
| Stockton-on-Tees | 2003        | 1.03<br>(0.92–1.16) |
| Stockton-on-Tees | 2004        | 1.01<br>(0.9–1.14)  |
| Stockton-on-Tees | 2005        | 1.01<br>(0.9–1.13)  |
| Stockton-on-Tees | 2006        | 1.04<br>(0.92–1.17) |
| Stockton-on-Tees | 2007        | 1.03<br>(0.91–1.17) |
| Stockton-on-Tees | 2008        | 1.01<br>(0.89–1.16) |

**Table 15 Ratio of adjusted to unadjusted 5q0 values for scaled locations by year**

| <b>Geography</b> | <b>Year</b> | <b>Ratio</b>        |
|------------------|-------------|---------------------|
| Stockton-on-Tees | 2009        | 0.99<br>(0.88–1.12) |
| Stockton-on-Tees | 2010        | 0.96<br>(0.86–1.08) |
| Stockton-on-Tees | 2011        | 0.97<br>(0.86–1.09) |
| Stockton-on-Tees | 2012        | 0.96<br>(0.86–1.09) |
| Stockton-on-Tees | 2013        | 0.95<br>(0.83–1.09) |
| Stockton-on-Tees | 2014        | 0.97<br>(0.84–1.11) |
| Stockton-on-Tees | 2015        | 0.98<br>(0.84–1.13) |
| Stockton-on-Tees | 2016        | 0.97<br>(0.84–1.11) |
| Stockton-on-Tees | 2017        | 1.0<br>(0.82–1.21)  |
| Sunderland       | 1950        | 0.76<br>(0.63–0.91) |
| Sunderland       | 1951        | 0.88<br>(0.72–1.05) |
| Sunderland       | 1952        | 0.82<br>(0.67–0.99) |
| Sunderland       | 1953        | 0.83<br>(0.67–0.99) |
| Sunderland       | 1954        | 0.78<br>(0.63–0.93) |
| Sunderland       | 1955        | 0.78<br>(0.63–0.93) |
| Sunderland       | 1956        | 0.76<br>(0.63–0.91) |
| Sunderland       | 1957        | 0.77<br>(0.65–0.9)  |
| Sunderland       | 1958        | 0.76<br>(0.65–0.87) |
| Sunderland       | 1959        | 0.76<br>(0.65–0.88) |
| Sunderland       | 1960        | 0.77<br>(0.65–0.91) |
| Sunderland       | 1961        | 0.79<br>(0.66–0.93) |
| Sunderland       | 1962        | 0.81<br>(0.67–0.96) |
| Sunderland       | 1963        | 0.81<br>(0.68–0.97) |
| Sunderland       | 1964        | 0.79<br>(0.66–0.94) |
| Sunderland       | 1965        | 0.78<br>(0.64–0.93) |
| Sunderland       | 1966        | 0.8<br>(0.65–0.95)  |
| Sunderland       | 1967        | 0.79<br>(0.63–0.95) |
| Sunderland       | 1968        | 0.82<br>(0.66–1.0)  |
| Sunderland       | 1969        | 0.83<br>(0.67–1.02) |
| Sunderland       | 1970        | 0.87<br>(0.71–1.05) |
| Sunderland       | 1971        | 0.89<br>(0.74–1.07) |

**Table 15 Ratio of adjusted to unadjusted 5q0 values for scaled locations by year**

| <b>Geography</b> | <b>Year</b> | <b>Ratio</b>        |
|------------------|-------------|---------------------|
| Sunderland       | 1972        | 0.9<br>(0.75–1.06)  |
| Sunderland       | 1973        | 0.9<br>(0.76–1.06)  |
| Sunderland       | 1974        | 0.91<br>(0.78–1.06) |
| Sunderland       | 1975        | 0.91<br>(0.77–1.07) |
| Sunderland       | 1976        | 0.88<br>(0.73–1.04) |
| Sunderland       | 1977        | 0.9<br>(0.75–1.07)  |
| Sunderland       | 1978        | 0.94<br>(0.79–1.11) |
| Sunderland       | 1979        | 0.96<br>(0.83–1.12) |
| Sunderland       | 1980        | 0.94<br>(0.83–1.08) |
| Sunderland       | 1981        | 0.9<br>(0.81–1.0)   |
| Sunderland       | 1982        | 0.93<br>(0.85–1.02) |
| Sunderland       | 1983        | 0.96<br>(0.88–1.05) |
| Sunderland       | 1984        | 0.94<br>(0.87–1.03) |
| Sunderland       | 1985        | 0.95<br>(0.87–1.04) |
| Sunderland       | 1986        | 0.98<br>(0.9–1.06)  |
| Sunderland       | 1987        | 0.97<br>(0.89–1.06) |
| Sunderland       | 1988        | 1.0<br>(0.91–1.08)  |
| Sunderland       | 1989        | 1.0<br>(0.92–1.09)  |
| Sunderland       | 1990        | 1.02<br>(0.93–1.1)  |
| Sunderland       | 1991        | 1.02<br>(0.94–1.12) |
| Sunderland       | 1992        | 0.97<br>(0.89–1.07) |
| Sunderland       | 1993        | 0.98<br>(0.89–1.07) |
| Sunderland       | 1994        | 0.98<br>(0.88–1.07) |
| Sunderland       | 1995        | 0.98<br>(0.88–1.08) |
| Sunderland       | 1996        | 1.0<br>(0.89–1.11)  |
| Sunderland       | 1997        | 0.97<br>(0.87–1.08) |
| Sunderland       | 1998        | 0.97<br>(0.86–1.07) |
| Sunderland       | 1999        | 1.0<br>(0.9–1.11)   |
| Sunderland       | 2000        | 1.01<br>(0.9–1.14)  |
| Sunderland       | 2001        | 1.01<br>(0.9–1.12)  |
| Sunderland       | 2002        | 0.99<br>(0.89–1.11) |

**Table 15 Ratio of adjusted to unadjusted 5q0 values for scaled locations by year**

| <b>Geography</b>   | <b>Year</b> | <b>Ratio</b>        |
|--------------------|-------------|---------------------|
| Sunderland         | 2003        | 1.03<br>(0.92–1.16) |
| Sunderland         | 2004        | 1.01<br>(0.9–1.14)  |
| Sunderland         | 2005        | 1.01<br>(0.9–1.13)  |
| Sunderland         | 2006        | 1.04<br>(0.92–1.17) |
| Sunderland         | 2007        | 1.03<br>(0.91–1.17) |
| Sunderland         | 2008        | 1.01<br>(0.89–1.16) |
| Sunderland         | 2009        | 0.99<br>(0.88–1.12) |
| Sunderland         | 2010        | 0.96<br>(0.86–1.08) |
| Sunderland         | 2011        | 0.97<br>(0.86–1.09) |
| Sunderland         | 2012        | 0.96<br>(0.86–1.09) |
| Sunderland         | 2013        | 0.95<br>(0.83–1.09) |
| Sunderland         | 2014        | 0.97<br>(0.84–1.11) |
| Sunderland         | 2015        | 0.98<br>(0.84–1.13) |
| Sunderland         | 2016        | 0.97<br>(0.84–1.11) |
| Sunderland         | 2017        | 1.0<br>(0.82–1.21)  |
| North West England | 1950        | 0.9<br>(0.74–1.08)  |
| North West England | 1951        | 1.04<br>(0.85–1.25) |
| North West England | 1952        | 0.97<br>(0.8–1.17)  |
| North West England | 1953        | 0.98<br>(0.8–1.17)  |
| North West England | 1954        | 0.91<br>(0.75–1.1)  |
| North West England | 1955        | 0.91<br>(0.74–1.11) |
| North West England | 1956        | 0.89<br>(0.73–1.09) |
| North West England | 1957        | 0.9<br>(0.73–1.1)   |
| North West England | 1958        | 0.88<br>(0.71–1.07) |
| North West England | 1959        | 0.87<br>(0.71–1.06) |
| North West England | 1960        | 0.88<br>(0.71–1.06) |
| North West England | 1961        | 0.89<br>(0.72–1.07) |
| North West England | 1962        | 0.91<br>(0.74–1.09) |
| North West England | 1963        | 0.91<br>(0.75–1.09) |
| North West England | 1964        | 0.88<br>(0.72–1.05) |
| North West England | 1965        | 0.85<br>(0.69–1.02) |

**Table 15 Ratio of adjusted to unadjusted 5q0 values for scaled locations by year**

| <b>Geography</b>   | <b>Year</b> | <b>Ratio</b>        |
|--------------------|-------------|---------------------|
| North West England | 1966        | 0.87<br>(0.71–1.04) |
| North West England | 1967        | 0.85<br>(0.69–1.02) |
| North West England | 1968        | 0.88<br>(0.72–1.05) |
| North West England | 1969        | 0.89<br>(0.73–1.06) |
| North West England | 1970        | 0.91<br>(0.76–1.08) |
| North West England | 1971        | 0.93<br>(0.78–1.1)  |
| North West England | 1972        | 0.93<br>(0.78–1.11) |
| North West England | 1973        | 0.93<br>(0.78–1.12) |
| North West England | 1974        | 0.94<br>(0.79–1.11) |
| North West England | 1975        | 0.93<br>(0.79–1.1)  |
| North West England | 1976        | 0.9<br>(0.77–1.04)  |
| North West England | 1977        | 0.92<br>(0.8–1.04)  |
| North West England | 1978        | 0.96<br>(0.85–1.08) |
| North West England | 1979        | 0.98<br>(0.9–1.08)  |
| North West England | 1980        | 0.97<br>(0.9–1.04)  |
| North West England | 1981        | 0.93<br>(0.89–0.97) |
| North West England | 1982        | 0.98<br>(0.95–1.01) |
| North West England | 1983        | 1.0<br>(0.97–1.03)  |
| North West England | 1984        | 0.98<br>(0.95–1.01) |
| North West England | 1985        | 0.99<br>(0.95–1.02) |
| North West England | 1986        | 0.99<br>(0.97–1.02) |
| North West England | 1987        | 0.99<br>(0.96–1.01) |
| North West England | 1988        | 1.0<br>(0.97–1.03)  |
| North West England | 1989        | 0.99<br>(0.97–1.01) |
| North West England | 1990        | 1.0<br>(0.98–1.02)  |
| North West England | 1991        | 1.0<br>(0.98–1.02)  |
| North West England | 1992        | 0.97<br>(0.95–1.0)  |
| North West England | 1993        | 1.0<br>(0.97–1.02)  |
| North West England | 1994        | 1.01<br>(0.98–1.04) |
| North West England | 1995        | 1.02<br>(0.99–1.05) |
| North West England | 1996        | 1.04<br>(1.01–1.06) |

**Table 15 Ratio of adjusted to unadjusted 5q0 values for scaled locations by year**

| <b>Geography</b>      | <b>Year</b> | <b>Ratio</b>        |
|-----------------------|-------------|---------------------|
| North West England    | 1997        | 1.01<br>(0.97–1.05) |
| North West England    | 1998        | 1.0<br>(0.96–1.03)  |
| North West England    | 1999        | 1.02<br>(0.99–1.06) |
| North West England    | 2000        | 1.01<br>(0.95–1.09) |
| North West England    | 2001        | 1.0<br>(0.96–1.04)  |
| North West England    | 2002        | 0.98<br>(0.95–1.02) |
| North West England    | 2003        | 1.02<br>(0.98–1.06) |
| North West England    | 2004        | 0.99<br>(0.96–1.02) |
| North West England    | 2005        | 0.99<br>(0.95–1.03) |
| North West England    | 2006        | 1.01<br>(0.97–1.05) |
| North West England    | 2007        | 1.01<br>(0.98–1.05) |
| North West England    | 2008        | 1.01<br>(0.98–1.04) |
| North West England    | 2009        | 1.0<br>(0.96–1.04)  |
| North West England    | 2010        | 0.98<br>(0.95–1.02) |
| North West England    | 2011        | 1.0<br>(0.96–1.04)  |
| North West England    | 2012        | 1.0<br>(0.96–1.04)  |
| North West England    | 2013        | 0.99<br>(0.95–1.02) |
| North West England    | 2014        | 0.99<br>(0.95–1.03) |
| North West England    | 2015        | 1.0<br>(0.96–1.04)  |
| North West England    | 2016        | 1.0<br>(0.94–1.05)  |
| North West England    | 2017        | 1.02<br>(0.92–1.14) |
| Blackburn with Darwen | 1950        | 0.57<br>(0.47–0.68) |
| Blackburn with Darwen | 1951        | 0.67<br>(0.55–0.8)  |
| Blackburn with Darwen | 1952        | 0.63<br>(0.52–0.75) |
| Blackburn with Darwen | 1953        | 0.64<br>(0.52–0.76) |
| Blackburn with Darwen | 1954        | 0.6<br>(0.5–0.71)   |
| Blackburn with Darwen | 1955        | 0.61<br>(0.51–0.71) |
| Blackburn with Darwen | 1956        | 0.6<br>(0.5–0.7)    |
| Blackburn with Darwen | 1957        | 0.61<br>(0.52–0.72) |
| Blackburn with Darwen | 1958        | 0.61<br>(0.51–0.71) |
| Blackburn with Darwen | 1959        | 0.61<br>(0.51–0.72) |



**Table 15 Ratio of adjusted to unadjusted 5q0 values for scaled locations by year**

| <b>Geography</b>      | <b>Year</b> | <b>Ratio</b>        |
|-----------------------|-------------|---------------------|
| Blackburn with Darwen | 1960        | 0.63<br>(0.53–0.74) |
| Blackburn with Darwen | 1961        | 0.64<br>(0.54–0.77) |
| Blackburn with Darwen | 1962        | 0.67<br>(0.55–0.8)  |
| Blackburn with Darwen | 1963        | 0.68<br>(0.56–0.81) |
| Blackburn with Darwen | 1964        | 0.67<br>(0.55–0.8)  |
| Blackburn with Darwen | 1965        | 0.66<br>(0.54–0.79) |
| Blackburn with Darwen | 1966        | 0.68<br>(0.56–0.82) |
| Blackburn with Darwen | 1967        | 0.68<br>(0.55–0.81) |
| Blackburn with Darwen | 1968        | 0.72<br>(0.58–0.86) |
| Blackburn with Darwen | 1969        | 0.74<br>(0.6–0.88)  |
| Blackburn with Darwen | 1970        | 0.77<br>(0.63–0.92) |
| Blackburn with Darwen | 1971        | 0.8<br>(0.67–0.95)  |
| Blackburn with Darwen | 1972        | 0.81<br>(0.68–0.96) |
| Blackburn with Darwen | 1973        | 0.83<br>(0.7–0.96)  |
| Blackburn with Darwen | 1974        | 0.85<br>(0.73–0.98) |
| Blackburn with Darwen | 1975        | 0.86<br>(0.74–0.99) |
| Blackburn with Darwen | 1976        | 0.84<br>(0.72–0.97) |
| Blackburn with Darwen | 1977        | 0.87<br>(0.76–0.99) |
| Blackburn with Darwen | 1978        | 0.92<br>(0.82–1.04) |
| Blackburn with Darwen | 1979        | 0.95<br>(0.86–1.06) |
| Blackburn with Darwen | 1980        | 0.95<br>(0.86–1.03) |
| Blackburn with Darwen | 1981        | 0.91<br>(0.84–0.98) |
| Blackburn with Darwen | 1982        | 0.97<br>(0.9–1.04)  |
| Blackburn with Darwen | 1983        | 0.95<br>(0.89–1.02) |
| Blackburn with Darwen | 1984        | 0.92<br>(0.86–0.98) |
| Blackburn with Darwen | 1985        | 0.97<br>(0.9–1.03)  |
| Blackburn with Darwen | 1986        | 1.01<br>(0.96–1.08) |
| Blackburn with Darwen | 1987        | 1.02<br>(0.94–1.1)  |
| Blackburn with Darwen | 1988        | 1.04<br>(0.98–1.11) |
| Blackburn with Darwen | 1989        | 1.02<br>(0.95–1.08) |
| Blackburn with Darwen | 1990        | 1.02<br>(0.94–1.1)  |

**Table 15 Ratio of adjusted to unadjusted 5q0 values for scaled locations by year**

| <b>Geography</b>      | <b>Year</b> | <b>Ratio</b>        |
|-----------------------|-------------|---------------------|
| Blackburn with Darwen | 1991        | 1.0<br>(0.93–1.06)  |
| Blackburn with Darwen | 1992        | 0.92<br>(0.85–0.98) |
| Blackburn with Darwen | 1993        | 0.91<br>(0.85–0.98) |
| Blackburn with Darwen | 1994        | 0.92<br>(0.84–1.0)  |
| Blackburn with Darwen | 1995        | 0.95<br>(0.87–1.04) |
| Blackburn with Darwen | 1996        | 0.99<br>(0.91–1.08) |
| Blackburn with Darwen | 1997        | 1.01<br>(0.93–1.1)  |
| Blackburn with Darwen | 1998        | 0.99<br>(0.91–1.08) |
| Blackburn with Darwen | 1999        | 1.04<br>(0.95–1.14) |
| Blackburn with Darwen | 2000        | 1.01<br>(0.92–1.12) |
| Blackburn with Darwen | 2001        | 1.0<br>(0.93–1.09)  |
| Blackburn with Darwen | 2002        | 0.99<br>(0.91–1.08) |
| Blackburn with Darwen | 2003        | 1.06<br>(0.97–1.16) |
| Blackburn with Darwen | 2004        | 1.02<br>(0.94–1.12) |
| Blackburn with Darwen | 2005        | 1.04<br>(0.94–1.14) |
| Blackburn with Darwen | 2006        | 1.07<br>(0.97–1.17) |
| Blackburn with Darwen | 2007        | 1.05<br>(0.95–1.17) |
| Blackburn with Darwen | 2008        | 1.04<br>(0.95–1.15) |
| Blackburn with Darwen | 2009        | 1.02<br>(0.93–1.11) |
| Blackburn with Darwen | 2010        | 0.99<br>(0.91–1.08) |
| Blackburn with Darwen | 2011        | 1.0<br>(0.91–1.1)   |
| Blackburn with Darwen | 2012        | 0.97<br>(0.88–1.06) |
| Blackburn with Darwen | 2013        | 0.94<br>(0.86–1.02) |
| Blackburn with Darwen | 2014        | 0.96<br>(0.86–1.06) |
| Blackburn with Darwen | 2015        | 0.99<br>(0.88–1.1)  |
| Blackburn with Darwen | 2016        | 1.04<br>(0.95–1.15) |
| Blackburn with Darwen | 2017        | 1.06<br>(0.9–1.23)  |
| Blackpool             | 1950        | 0.57<br>(0.47–0.68) |
| Blackpool             | 1951        | 0.67<br>(0.55–0.8)  |
| Blackpool             | 1952        | 0.63<br>(0.52–0.75) |
| Blackpool             | 1953        | 0.64<br>(0.52–0.76) |

**Table 15 Ratio of adjusted to unadjusted 5q0 values for scaled locations by year**

| <b>Geography</b> | <b>Year</b> | <b>Ratio</b>        |
|------------------|-------------|---------------------|
| Blackpool        | 1954        | 0.6<br>(0.5–0.71)   |
| Blackpool        | 1955        | 0.6<br>(0.51–0.71)  |
| Blackpool        | 1956        | 0.6<br>(0.5–0.7)    |
| Blackpool        | 1957        | 0.61<br>(0.52–0.72) |
| Blackpool        | 1958        | 0.61<br>(0.51–0.71) |
| Blackpool        | 1959        | 0.61<br>(0.51–0.72) |
| Blackpool        | 1960        | 0.63<br>(0.53–0.74) |
| Blackpool        | 1961        | 0.64<br>(0.54–0.77) |
| Blackpool        | 1962        | 0.67<br>(0.55–0.8)  |
| Blackpool        | 1963        | 0.68<br>(0.56–0.81) |
| Blackpool        | 1964        | 0.67<br>(0.55–0.8)  |
| Blackpool        | 1965        | 0.66<br>(0.54–0.79) |
| Blackpool        | 1966        | 0.68<br>(0.56–0.82) |
| Blackpool        | 1967        | 0.68<br>(0.55–0.81) |
| Blackpool        | 1968        | 0.72<br>(0.58–0.86) |
| Blackpool        | 1969        | 0.73<br>(0.6–0.88)  |
| Blackpool        | 1970        | 0.77<br>(0.63–0.92) |
| Blackpool        | 1971        | 0.8<br>(0.67–0.95)  |
| Blackpool        | 1972        | 0.81<br>(0.68–0.96) |
| Blackpool        | 1973        | 0.83<br>(0.7–0.96)  |
| Blackpool        | 1974        | 0.85<br>(0.73–0.98) |
| Blackpool        | 1975        | 0.86<br>(0.74–0.99) |
| Blackpool        | 1976        | 0.84<br>(0.72–0.97) |
| Blackpool        | 1977        | 0.87<br>(0.76–0.99) |
| Blackpool        | 1978        | 0.92<br>(0.82–1.04) |
| Blackpool        | 1979        | 0.95<br>(0.85–1.06) |
| Blackpool        | 1980        | 0.95<br>(0.86–1.03) |
| Blackpool        | 1981        | 0.91<br>(0.84–0.98) |
| Blackpool        | 1982        | 0.97<br>(0.9–1.04)  |
| Blackpool        | 1983        | 0.95<br>(0.89–1.02) |
| Blackpool        | 1984        | 0.92<br>(0.86–0.98) |

**Table 15 Ratio of adjusted to unadjusted 5q0 values for scaled locations by year**

| <b>Geography</b> | <b>Year</b> | <b>Ratio</b>        |
|------------------|-------------|---------------------|
| Blackpool        | 1985        | 0.97<br>(0.9–1.03)  |
| Blackpool        | 1986        | 1.01<br>(0.96–1.08) |
| Blackpool        | 1987        | 1.02<br>(0.94–1.1)  |
| Blackpool        | 1988        | 1.04<br>(0.98–1.11) |
| Blackpool        | 1989        | 1.02<br>(0.95–1.08) |
| Blackpool        | 1990        | 1.02<br>(0.94–1.1)  |
| Blackpool        | 1991        | 1.0<br>(0.93–1.06)  |
| Blackpool        | 1992        | 0.92<br>(0.85–0.98) |
| Blackpool        | 1993        | 0.91<br>(0.85–0.98) |
| Blackpool        | 1994        | 0.92<br>(0.84–1.0)  |
| Blackpool        | 1995        | 0.95<br>(0.87–1.04) |
| Blackpool        | 1996        | 0.99<br>(0.91–1.08) |
| Blackpool        | 1997        | 1.01<br>(0.93–1.1)  |
| Blackpool        | 1998        | 0.99<br>(0.91–1.08) |
| Blackpool        | 1999        | 1.04<br>(0.95–1.14) |
| Blackpool        | 2000        | 1.01<br>(0.92–1.12) |
| Blackpool        | 2001        | 1.0<br>(0.93–1.09)  |
| Blackpool        | 2002        | 0.99<br>(0.91–1.08) |
| Blackpool        | 2003        | 1.06<br>(0.97–1.16) |
| Blackpool        | 2004        | 1.02<br>(0.94–1.12) |
| Blackpool        | 2005        | 1.04<br>(0.94–1.14) |
| Blackpool        | 2006        | 1.07<br>(0.97–1.17) |
| Blackpool        | 2007        | 1.05<br>(0.95–1.17) |
| Blackpool        | 2008        | 1.04<br>(0.95–1.15) |
| Blackpool        | 2009        | 1.02<br>(0.93–1.11) |
| Blackpool        | 2010        | 0.99<br>(0.91–1.08) |
| Blackpool        | 2011        | 1.0<br>(0.91–1.1)   |
| Blackpool        | 2012        | 0.97<br>(0.88–1.06) |
| Blackpool        | 2013        | 0.94<br>(0.86–1.02) |
| Blackpool        | 2014        | 0.96<br>(0.86–1.06) |
| Blackpool        | 2015        | 0.99<br>(0.88–1.1)  |

**Table 15 Ratio of adjusted to unadjusted 5q0 values for scaled locations by year**

| <b>Geography</b> | <b>Year</b> | <b>Ratio</b>        |
|------------------|-------------|---------------------|
| Blackpool        | 2016        | 1.04<br>(0.95–1.15) |
| Blackpool        | 2017        | 1.06<br>(0.9–1.23)  |
| Bolton           | 1950        | 0.57<br>(0.47–0.68) |
| Bolton           | 1951        | 0.67<br>(0.55–0.8)  |
| Bolton           | 1952        | 0.63<br>(0.52–0.75) |
| Bolton           | 1953        | 0.64<br>(0.52–0.76) |
| Bolton           | 1954        | 0.6<br>(0.5–0.71)   |
| Bolton           | 1955        | 0.61<br>(0.51–0.71) |
| Bolton           | 1956        | 0.6<br>(0.5–0.7)    |
| Bolton           | 1957        | 0.61<br>(0.52–0.72) |
| Bolton           | 1958        | 0.61<br>(0.51–0.71) |
| Bolton           | 1959        | 0.61<br>(0.51–0.72) |
| Bolton           | 1960        | 0.63<br>(0.53–0.74) |
| Bolton           | 1961        | 0.64<br>(0.54–0.77) |
| Bolton           | 1962        | 0.67<br>(0.56–0.8)  |
| Bolton           | 1963        | 0.68<br>(0.56–0.81) |
| Bolton           | 1964        | 0.67<br>(0.55–0.8)  |
| Bolton           | 1965        | 0.66<br>(0.54–0.79) |
| Bolton           | 1966        | 0.68<br>(0.56–0.82) |
| Bolton           | 1967        | 0.68<br>(0.55–0.81) |
| Bolton           | 1968        | 0.72<br>(0.59–0.86) |
| Bolton           | 1969        | 0.74<br>(0.6–0.88)  |
| Bolton           | 1970        | 0.77<br>(0.63–0.92) |
| Bolton           | 1971        | 0.8<br>(0.67–0.95)  |
| Bolton           | 1972        | 0.81<br>(0.68–0.96) |
| Bolton           | 1973        | 0.83<br>(0.7–0.96)  |
| Bolton           | 1974        | 0.85<br>(0.73–0.98) |
| Bolton           | 1975        | 0.86<br>(0.74–0.99) |
| Bolton           | 1976        | 0.84<br>(0.72–0.97) |
| Bolton           | 1977        | 0.87<br>(0.76–0.99) |
| Bolton           | 1978        | 0.92<br>(0.82–1.04) |

**Table 15 Ratio of adjusted to unadjusted 5q0 values for scaled locations by year**

| <b>Geography</b> | <b>Year</b> | <b>Ratio</b>        |
|------------------|-------------|---------------------|
| Bolton           | 1979        | 0.95<br>(0.85–1.06) |
| Bolton           | 1980        | 0.95<br>(0.86–1.03) |
| Bolton           | 1981        | 0.91<br>(0.84–0.98) |
| Bolton           | 1982        | 0.97<br>(0.9–1.04)  |
| Bolton           | 1983        | 0.95<br>(0.89–1.02) |
| Bolton           | 1984        | 0.92<br>(0.86–0.98) |
| Bolton           | 1985        | 0.97<br>(0.9–1.03)  |
| Bolton           | 1986        | 1.01<br>(0.96–1.08) |
| Bolton           | 1987        | 1.02<br>(0.94–1.1)  |
| Bolton           | 1988        | 1.04<br>(0.98–1.11) |
| Bolton           | 1989        | 1.02<br>(0.95–1.08) |
| Bolton           | 1990        | 1.02<br>(0.94–1.1)  |
| Bolton           | 1991        | 1.0<br>(0.93–1.06)  |
| Bolton           | 1992        | 0.92<br>(0.85–0.98) |
| Bolton           | 1993        | 0.91<br>(0.85–0.98) |
| Bolton           | 1994        | 0.92<br>(0.84–1.0)  |
| Bolton           | 1995        | 0.95<br>(0.87–1.04) |
| Bolton           | 1996        | 0.99<br>(0.91–1.08) |
| Bolton           | 1997        | 1.01<br>(0.93–1.1)  |
| Bolton           | 1998        | 0.99<br>(0.91–1.08) |
| Bolton           | 1999        | 1.04<br>(0.95–1.14) |
| Bolton           | 2000        | 1.01<br>(0.92–1.12) |
| Bolton           | 2001        | 1.0<br>(0.93–1.09)  |
| Bolton           | 2002        | 0.99<br>(0.91–1.08) |
| Bolton           | 2003        | 1.06<br>(0.97–1.16) |
| Bolton           | 2004        | 1.02<br>(0.94–1.12) |
| Bolton           | 2005        | 1.04<br>(0.94–1.14) |
| Bolton           | 2006        | 1.07<br>(0.97–1.17) |
| Bolton           | 2007        | 1.05<br>(0.95–1.17) |
| Bolton           | 2008        | 1.04<br>(0.95–1.15) |
| Bolton           | 2009        | 1.02<br>(0.93–1.11) |

**Table 15 Ratio of adjusted to unadjusted 5q0 values for scaled locations by year**

| <b>Geography</b> | <b>Year</b> | <b>Ratio</b>        |
|------------------|-------------|---------------------|
| Bolton           | 2010        | 0.99<br>(0.91–1.08) |
| Bolton           | 2011        | 1.0<br>(0.91–1.1)   |
| Bolton           | 2012        | 0.97<br>(0.88–1.06) |
| Bolton           | 2013        | 0.94<br>(0.86–1.02) |
| Bolton           | 2014        | 0.96<br>(0.86–1.06) |
| Bolton           | 2015        | 0.99<br>(0.88–1.1)  |
| Bolton           | 2016        | 1.04<br>(0.95–1.15) |
| Bolton           | 2017        | 1.06<br>(0.9–1.23)  |
| Bury             | 1950        | 0.57<br>(0.47–0.68) |
| Bury             | 1951        | 0.67<br>(0.55–0.8)  |
| Bury             | 1952        | 0.63<br>(0.52–0.75) |
| Bury             | 1953        | 0.64<br>(0.52–0.76) |
| Bury             | 1954        | 0.6<br>(0.5–0.71)   |
| Bury             | 1955        | 0.61<br>(0.51–0.71) |
| Bury             | 1956        | 0.6<br>(0.5–0.7)    |
| Bury             | 1957        | 0.61<br>(0.52–0.72) |
| Bury             | 1958        | 0.61<br>(0.51–0.71) |
| Bury             | 1959        | 0.61<br>(0.51–0.72) |
| Bury             | 1960        | 0.63<br>(0.53–0.74) |
| Bury             | 1961        | 0.64<br>(0.54–0.77) |
| Bury             | 1962        | 0.67<br>(0.56–0.8)  |
| Bury             | 1963        | 0.68<br>(0.56–0.81) |
| Bury             | 1964        | 0.67<br>(0.55–0.8)  |
| Bury             | 1965        | 0.66<br>(0.54–0.79) |
| Bury             | 1966        | 0.68<br>(0.56–0.82) |
| Bury             | 1967        | 0.68<br>(0.55–0.81) |
| Bury             | 1968        | 0.72<br>(0.59–0.86) |
| Bury             | 1969        | 0.74<br>(0.6–0.88)  |
| Bury             | 1970        | 0.77<br>(0.63–0.92) |
| Bury             | 1971        | 0.8<br>(0.67–0.95)  |
| Bury             | 1972        | 0.81<br>(0.68–0.96) |

**Table 15 Ratio of adjusted to unadjusted 5q0 values for scaled locations by year**

| <b>Geography</b> | <b>Year</b> | <b>Ratio</b>        |
|------------------|-------------|---------------------|
| Bury             | 1973        | 0.83<br>(0.7–0.96)  |
| Bury             | 1974        | 0.85<br>(0.73–0.98) |
| Bury             | 1975        | 0.86<br>(0.74–0.99) |
| Bury             | 1976        | 0.84<br>(0.72–0.97) |
| Bury             | 1977        | 0.87<br>(0.76–0.99) |
| Bury             | 1978        | 0.92<br>(0.82–1.04) |
| Bury             | 1979        | 0.95<br>(0.86–1.06) |
| Bury             | 1980        | 0.95<br>(0.86–1.03) |
| Bury             | 1981        | 0.91<br>(0.84–0.98) |
| Bury             | 1982        | 0.97<br>(0.9–1.04)  |
| Bury             | 1983        | 0.95<br>(0.89–1.02) |
| Bury             | 1984        | 0.92<br>(0.86–0.98) |
| Bury             | 1985        | 0.97<br>(0.9–1.03)  |
| Bury             | 1986        | 1.01<br>(0.96–1.08) |
| Bury             | 1987        | 1.02<br>(0.94–1.1)  |
| Bury             | 1988        | 1.04<br>(0.98–1.11) |
| Bury             | 1989        | 1.02<br>(0.95–1.08) |
| Bury             | 1990        | 1.02<br>(0.94–1.1)  |
| Bury             | 1991        | 1.0<br>(0.93–1.06)  |
| Bury             | 1992        | 0.92<br>(0.85–0.98) |
| Bury             | 1993        | 0.91<br>(0.85–0.98) |
| Bury             | 1994        | 0.92<br>(0.84–1.0)  |
| Bury             | 1995        | 0.95<br>(0.87–1.04) |
| Bury             | 1996        | 0.99<br>(0.91–1.08) |
| Bury             | 1997        | 1.01<br>(0.93–1.1)  |
| Bury             | 1998        | 0.99<br>(0.91–1.08) |
| Bury             | 1999        | 1.04<br>(0.95–1.14) |
| Bury             | 2000        | 1.01<br>(0.92–1.12) |
| Bury             | 2001        | 1.0<br>(0.93–1.09)  |
| Bury             | 2002        | 0.99<br>(0.91–1.08) |
| Bury             | 2003        | 1.06<br>(0.97–1.16) |



**Table 15 Ratio of adjusted to unadjusted 5q0 values for scaled locations by year**

| <b>Geography</b> | <b>Year</b> | <b>Ratio</b>        |
|------------------|-------------|---------------------|
| Bury             | 2004        | 1.02<br>(0.94–1.12) |
| Bury             | 2005        | 1.04<br>(0.94–1.14) |
| Bury             | 2006        | 1.07<br>(0.97–1.17) |
| Bury             | 2007        | 1.05<br>(0.95–1.17) |
| Bury             | 2008        | 1.04<br>(0.95–1.15) |
| Bury             | 2009        | 1.02<br>(0.93–1.11) |
| Bury             | 2010        | 0.99<br>(0.91–1.08) |
| Bury             | 2011        | 1.0<br>(0.91–1.1)   |
| Bury             | 2012        | 0.97<br>(0.88–1.06) |
| Bury             | 2013        | 0.94<br>(0.86–1.02) |
| Bury             | 2014        | 0.96<br>(0.86–1.06) |
| Bury             | 2015        | 0.99<br>(0.88–1.1)  |
| Bury             | 2016        | 1.04<br>(0.95–1.15) |
| Bury             | 2017        | 1.06<br>(0.9–1.23)  |
| Cheshire East    | 1950        | 0.57<br>(0.47–0.68) |
| Cheshire East    | 1951        | 0.67<br>(0.55–0.8)  |
| Cheshire East    | 1952        | 0.63<br>(0.52–0.75) |
| Cheshire East    | 1953        | 0.64<br>(0.52–0.76) |
| Cheshire East    | 1954        | 0.6<br>(0.5–0.71)   |
| Cheshire East    | 1955        | 0.6<br>(0.51–0.71)  |
| Cheshire East    | 1956        | 0.6<br>(0.5–0.7)    |
| Cheshire East    | 1957        | 0.61<br>(0.52–0.72) |
| Cheshire East    | 1958        | 0.61<br>(0.51–0.71) |
| Cheshire East    | 1959        | 0.61<br>(0.51–0.72) |
| Cheshire East    | 1960        | 0.63<br>(0.52–0.74) |
| Cheshire East    | 1961        | 0.64<br>(0.54–0.77) |
| Cheshire East    | 1962        | 0.67<br>(0.55–0.8)  |
| Cheshire East    | 1963        | 0.68<br>(0.56–0.81) |
| Cheshire East    | 1964        | 0.67<br>(0.55–0.8)  |
| Cheshire East    | 1965        | 0.66<br>(0.54–0.79) |
| Cheshire East    | 1966        | 0.68<br>(0.56–0.82) |

**Table 15 Ratio of adjusted to unadjusted 5q0 values for scaled locations by year**

| <b>Geography</b> | <b>Year</b> | <b>Ratio</b>        |
|------------------|-------------|---------------------|
| Cheshire East    | 1967        | 0.68<br>(0.55–0.81) |
| Cheshire East    | 1968        | 0.72<br>(0.58–0.86) |
| Cheshire East    | 1969        | 0.73<br>(0.6–0.88)  |
| Cheshire East    | 1970        | 0.77<br>(0.63–0.92) |
| Cheshire East    | 1971        | 0.8<br>(0.67–0.95)  |
| Cheshire East    | 1972        | 0.81<br>(0.68–0.96) |
| Cheshire East    | 1973        | 0.83<br>(0.7–0.96)  |
| Cheshire East    | 1974        | 0.85<br>(0.73–0.98) |
| Cheshire East    | 1975        | 0.86<br>(0.74–0.99) |
| Cheshire East    | 1976        | 0.84<br>(0.72–0.97) |
| Cheshire East    | 1977        | 0.87<br>(0.76–0.99) |
| Cheshire East    | 1978        | 0.92<br>(0.82–1.04) |
| Cheshire East    | 1979        | 0.95<br>(0.85–1.06) |
| Cheshire East    | 1980        | 0.95<br>(0.86–1.03) |
| Cheshire East    | 1981        | 0.91<br>(0.84–0.98) |
| Cheshire East    | 1982        | 0.97<br>(0.9–1.04)  |
| Cheshire East    | 1983        | 0.95<br>(0.89–1.02) |
| Cheshire East    | 1984        | 0.92<br>(0.86–0.98) |
| Cheshire East    | 1985        | 0.97<br>(0.9–1.03)  |
| Cheshire East    | 1986        | 1.01<br>(0.96–1.08) |
| Cheshire East    | 1987        | 1.02<br>(0.94–1.1)  |
| Cheshire East    | 1988        | 1.04<br>(0.98–1.11) |
| Cheshire East    | 1989        | 1.02<br>(0.95–1.08) |
| Cheshire East    | 1990        | 1.02<br>(0.94–1.1)  |
| Cheshire East    | 1991        | 1.0<br>(0.93–1.06)  |
| Cheshire East    | 1992        | 0.92<br>(0.85–0.98) |
| Cheshire East    | 1993        | 0.91<br>(0.85–0.98) |
| Cheshire East    | 1994        | 0.92<br>(0.84–1.0)  |
| Cheshire East    | 1995        | 0.95<br>(0.87–1.04) |
| Cheshire East    | 1996        | 0.99<br>(0.91–1.08) |
| Cheshire East    | 1997        | 1.01<br>(0.93–1.1)  |

**Table 15 Ratio of adjusted to unadjusted 5q0 values for scaled locations by year**

| <b>Geography</b>          | <b>Year</b> | <b>Ratio</b>        |
|---------------------------|-------------|---------------------|
| Cheshire East             | 1998        | 0.99<br>(0.91–1.08) |
| Cheshire East             | 1999        | 1.04<br>(0.95–1.14) |
| Cheshire East             | 2000        | 1.01<br>(0.92–1.12) |
| Cheshire East             | 2001        | 1.0<br>(0.93–1.09)  |
| Cheshire East             | 2002        | 0.99<br>(0.91–1.08) |
| Cheshire East             | 2003        | 1.06<br>(0.97–1.16) |
| Cheshire East             | 2004        | 1.02<br>(0.94–1.12) |
| Cheshire East             | 2005        | 1.04<br>(0.94–1.14) |
| Cheshire East             | 2006        | 1.07<br>(0.97–1.17) |
| Cheshire East             | 2007        | 1.05<br>(0.95–1.17) |
| Cheshire East             | 2008        | 1.04<br>(0.95–1.15) |
| Cheshire East             | 2009        | 1.02<br>(0.93–1.11) |
| Cheshire East             | 2010        | 0.99<br>(0.91–1.08) |
| Cheshire East             | 2011        | 1.0<br>(0.91–1.1)   |
| Cheshire East             | 2012        | 0.97<br>(0.88–1.06) |
| Cheshire East             | 2013        | 0.94<br>(0.86–1.02) |
| Cheshire East             | 2014        | 0.96<br>(0.86–1.06) |
| Cheshire East             | 2015        | 0.99<br>(0.88–1.1)  |
| Cheshire East             | 2016        | 1.04<br>(0.95–1.15) |
| Cheshire East             | 2017        | 1.06<br>(0.9–1.23)  |
| Cheshire West and Chester | 1950        | 0.57<br>(0.47–0.68) |
| Cheshire West and Chester | 1951        | 0.67<br>(0.55–0.8)  |
| Cheshire West and Chester | 1952        | 0.63<br>(0.52–0.75) |
| Cheshire West and Chester | 1953        | 0.63<br>(0.52–0.76) |
| Cheshire West and Chester | 1954        | 0.6<br>(0.5–0.71)   |
| Cheshire West and Chester | 1955        | 0.6<br>(0.51–0.71)  |
| Cheshire West and Chester | 1956        | 0.6<br>(0.5–0.7)    |
| Cheshire West and Chester | 1957        | 0.61<br>(0.52–0.72) |
| Cheshire West and Chester | 1958        | 0.61<br>(0.51–0.71) |
| Cheshire West and Chester | 1959        | 0.61<br>(0.51–0.72) |
| Cheshire West and Chester | 1960        | 0.63<br>(0.52–0.74) |

**Table 15 Ratio of adjusted to unadjusted 5q0 values for scaled locations by year**

| <b>Geography</b>          | <b>Year</b> | <b>Ratio</b>        |
|---------------------------|-------------|---------------------|
| Cheshire West and Chester | 1961        | 0.64<br>(0.54–0.77) |
| Cheshire West and Chester | 1962        | 0.67<br>(0.55–0.8)  |
| Cheshire West and Chester | 1963        | 0.68<br>(0.56–0.81) |
| Cheshire West and Chester | 1964        | 0.67<br>(0.55–0.8)  |
| Cheshire West and Chester | 1965        | 0.66<br>(0.54–0.79) |
| Cheshire West and Chester | 1966        | 0.68<br>(0.56–0.82) |
| Cheshire West and Chester | 1967        | 0.68<br>(0.55–0.81) |
| Cheshire West and Chester | 1968        | 0.72<br>(0.58–0.86) |
| Cheshire West and Chester | 1969        | 0.73<br>(0.6–0.88)  |
| Cheshire West and Chester | 1970        | 0.77<br>(0.63–0.92) |
| Cheshire West and Chester | 1971        | 0.8<br>(0.67–0.95)  |
| Cheshire West and Chester | 1972        | 0.81<br>(0.68–0.96) |
| Cheshire West and Chester | 1973        | 0.83<br>(0.7–0.96)  |
| Cheshire West and Chester | 1974        | 0.85<br>(0.73–0.98) |
| Cheshire West and Chester | 1975        | 0.86<br>(0.74–0.99) |
| Cheshire West and Chester | 1976        | 0.84<br>(0.72–0.97) |
| Cheshire West and Chester | 1977        | 0.87<br>(0.75–0.99) |
| Cheshire West and Chester | 1978        | 0.92<br>(0.82–1.04) |
| Cheshire West and Chester | 1979        | 0.95<br>(0.85–1.06) |
| Cheshire West and Chester | 1980        | 0.95<br>(0.86–1.03) |
| Cheshire West and Chester | 1981        | 0.91<br>(0.84–0.98) |
| Cheshire West and Chester | 1982        | 0.97<br>(0.9–1.04)  |
| Cheshire West and Chester | 1983        | 0.95<br>(0.89–1.02) |
| Cheshire West and Chester | 1984        | 0.92<br>(0.86–0.98) |
| Cheshire West and Chester | 1985        | 0.97<br>(0.9–1.03)  |
| Cheshire West and Chester | 1986        | 1.01<br>(0.96–1.08) |
| Cheshire West and Chester | 1987        | 1.02<br>(0.94–1.1)  |
| Cheshire West and Chester | 1988        | 1.04<br>(0.98–1.11) |
| Cheshire West and Chester | 1989        | 1.02<br>(0.95–1.08) |
| Cheshire West and Chester | 1990        | 1.02<br>(0.94–1.1)  |
| Cheshire West and Chester | 1991        | 1.0<br>(0.93–1.06)  |

**Table 15 Ratio of adjusted to unadjusted 5q0 values for scaled locations by year**

| <b>Geography</b>          | <b>Year</b> | <b>Ratio</b>        |
|---------------------------|-------------|---------------------|
| Cheshire West and Chester | 1992        | 0.92<br>(0.85–0.98) |
| Cheshire West and Chester | 1993        | 0.91<br>(0.85–0.98) |
| Cheshire West and Chester | 1994        | 0.92<br>(0.84–1.0)  |
| Cheshire West and Chester | 1995        | 0.95<br>(0.87–1.04) |
| Cheshire West and Chester | 1996        | 0.99<br>(0.91–1.08) |
| Cheshire West and Chester | 1997        | 1.01<br>(0.93–1.1)  |
| Cheshire West and Chester | 1998        | 0.99<br>(0.91–1.08) |
| Cheshire West and Chester | 1999        | 1.04<br>(0.95–1.14) |
| Cheshire West and Chester | 2000        | 1.01<br>(0.92–1.12) |
| Cheshire West and Chester | 2001        | 1.0<br>(0.93–1.09)  |
| Cheshire West and Chester | 2002        | 0.99<br>(0.91–1.08) |
| Cheshire West and Chester | 2003        | 1.06<br>(0.97–1.16) |
| Cheshire West and Chester | 2004        | 1.02<br>(0.94–1.12) |
| Cheshire West and Chester | 2005        | 1.04<br>(0.94–1.14) |
| Cheshire West and Chester | 2006        | 1.07<br>(0.97–1.17) |
| Cheshire West and Chester | 2007        | 1.05<br>(0.95–1.17) |
| Cheshire West and Chester | 2008        | 1.04<br>(0.95–1.15) |
| Cheshire West and Chester | 2009        | 1.02<br>(0.93–1.11) |
| Cheshire West and Chester | 2010        | 0.99<br>(0.91–1.08) |
| Cheshire West and Chester | 2011        | 1.0<br>(0.91–1.1)   |
| Cheshire West and Chester | 2012        | 0.97<br>(0.88–1.06) |
| Cheshire West and Chester | 2013        | 0.94<br>(0.86–1.02) |
| Cheshire West and Chester | 2014        | 0.96<br>(0.86–1.06) |
| Cheshire West and Chester | 2015        | 0.99<br>(0.88–1.1)  |
| Cheshire West and Chester | 2016        | 1.04<br>(0.95–1.15) |
| Cheshire West and Chester | 2017        | 1.06<br>(0.9–1.23)  |
| Cumbria                   | 1950        | 0.57<br>(0.47–0.68) |
| Cumbria                   | 1951        | 0.67<br>(0.55–0.8)  |
| Cumbria                   | 1952        | 0.63<br>(0.52–0.75) |
| Cumbria                   | 1953        | 0.64<br>(0.52–0.76) |
| Cumbria                   | 1954        | 0.6<br>(0.5–0.71)   |

**Table 15 Ratio of adjusted to unadjusted 5q0 values for scaled locations by year**

| <b>Geography</b> | <b>Year</b> | <b>Ratio</b>        |
|------------------|-------------|---------------------|
| Cumbria          | 1955        | 0.6<br>(0.51–0.71)  |
| Cumbria          | 1956        | 0.6<br>(0.5–0.7)    |
| Cumbria          | 1957        | 0.61<br>(0.52–0.72) |
| Cumbria          | 1958        | 0.61<br>(0.51–0.71) |
| Cumbria          | 1959        | 0.61<br>(0.51–0.72) |
| Cumbria          | 1960        | 0.63<br>(0.53–0.74) |
| Cumbria          | 1961        | 0.64<br>(0.54–0.77) |
| Cumbria          | 1962        | 0.67<br>(0.55–0.8)  |
| Cumbria          | 1963        | 0.68<br>(0.56–0.81) |
| Cumbria          | 1964        | 0.67<br>(0.55–0.8)  |
| Cumbria          | 1965        | 0.66<br>(0.54–0.79) |
| Cumbria          | 1966        | 0.68<br>(0.56–0.82) |
| Cumbria          | 1967        | 0.68<br>(0.55–0.81) |
| Cumbria          | 1968        | 0.72<br>(0.58–0.86) |
| Cumbria          | 1969        | 0.73<br>(0.6–0.88)  |
| Cumbria          | 1970        | 0.77<br>(0.63–0.92) |
| Cumbria          | 1971        | 0.8<br>(0.67–0.95)  |
| Cumbria          | 1972        | 0.81<br>(0.68–0.96) |
| Cumbria          | 1973        | 0.83<br>(0.7–0.96)  |
| Cumbria          | 1974        | 0.85<br>(0.73–0.98) |
| Cumbria          | 1975        | 0.86<br>(0.74–0.99) |
| Cumbria          | 1976        | 0.84<br>(0.72–0.97) |
| Cumbria          | 1977        | 0.87<br>(0.75–0.99) |
| Cumbria          | 1978        | 0.92<br>(0.82–1.04) |
| Cumbria          | 1979        | 0.95<br>(0.85–1.06) |
| Cumbria          | 1980        | 0.95<br>(0.86–1.03) |
| Cumbria          | 1981        | 0.91<br>(0.84–0.98) |
| Cumbria          | 1982        | 0.97<br>(0.9–1.04)  |
| Cumbria          | 1983        | 0.95<br>(0.89–1.02) |
| Cumbria          | 1984        | 0.92<br>(0.86–0.98) |
| Cumbria          | 1985        | 0.97<br>(0.9–1.03)  |

**Table 15 Ratio of adjusted to unadjusted 5q0 values for scaled locations by year**

| <b>Geography</b> | <b>Year</b> | <b>Ratio</b>        |
|------------------|-------------|---------------------|
| Cumbria          | 1986        | 1.01<br>(0.96–1.08) |
| Cumbria          | 1987        | 1.02<br>(0.94–1.1)  |
| Cumbria          | 1988        | 1.04<br>(0.98–1.11) |
| Cumbria          | 1989        | 1.02<br>(0.95–1.08) |
| Cumbria          | 1990        | 1.02<br>(0.94–1.1)  |
| Cumbria          | 1991        | 1.0<br>(0.93–1.06)  |
| Cumbria          | 1992        | 0.92<br>(0.85–0.98) |
| Cumbria          | 1993        | 0.91<br>(0.85–0.98) |
| Cumbria          | 1994        | 0.92<br>(0.84–1.0)  |
| Cumbria          | 1995        | 0.95<br>(0.87–1.04) |
| Cumbria          | 1996        | 0.99<br>(0.91–1.08) |
| Cumbria          | 1997        | 1.01<br>(0.93–1.1)  |
| Cumbria          | 1998        | 0.99<br>(0.91–1.08) |
| Cumbria          | 1999        | 1.04<br>(0.95–1.14) |
| Cumbria          | 2000        | 1.01<br>(0.92–1.12) |
| Cumbria          | 2001        | 1.0<br>(0.93–1.09)  |
| Cumbria          | 2002        | 0.99<br>(0.91–1.08) |
| Cumbria          | 2003        | 1.06<br>(0.97–1.16) |
| Cumbria          | 2004        | 1.02<br>(0.94–1.12) |
| Cumbria          | 2005        | 1.04<br>(0.94–1.14) |
| Cumbria          | 2006        | 1.07<br>(0.97–1.17) |
| Cumbria          | 2007        | 1.05<br>(0.95–1.17) |
| Cumbria          | 2008        | 1.04<br>(0.95–1.15) |
| Cumbria          | 2009        | 1.02<br>(0.93–1.11) |
| Cumbria          | 2010        | 0.99<br>(0.91–1.08) |
| Cumbria          | 2011        | 1.0<br>(0.91–1.1)   |
| Cumbria          | 2012        | 0.97<br>(0.88–1.06) |
| Cumbria          | 2013        | 0.94<br>(0.86–1.02) |
| Cumbria          | 2014        | 0.96<br>(0.86–1.06) |
| Cumbria          | 2015        | 0.99<br>(0.88–1.1)  |
| Cumbria          | 2016        | 1.04<br>(0.95–1.15) |

**Table 15 Ratio of adjusted to unadjusted 5q0 values for scaled locations by year**

| <b>Geography</b> | <b>Year</b> | <b>Ratio</b>        |
|------------------|-------------|---------------------|
| Cumbria          | 2017        | 1.06<br>(0.9–1.23)  |
| Halton           | 1950        | 0.57<br>(0.47–0.68) |
| Halton           | 1951        | 0.67<br>(0.55–0.8)  |
| Halton           | 1952        | 0.63<br>(0.52–0.75) |
| Halton           | 1953        | 0.64<br>(0.52–0.76) |
| Halton           | 1954        | 0.6<br>(0.5–0.71)   |
| Halton           | 1955        | 0.6<br>(0.51–0.71)  |
| Halton           | 1956        | 0.6<br>(0.5–0.7)    |
| Halton           | 1957        | 0.61<br>(0.52–0.72) |
| Halton           | 1958        | 0.61<br>(0.51–0.71) |
| Halton           | 1959        | 0.61<br>(0.51–0.72) |
| Halton           | 1960        | 0.63<br>(0.52–0.74) |
| Halton           | 1961        | 0.64<br>(0.54–0.77) |
| Halton           | 1962        | 0.67<br>(0.55–0.8)  |
| Halton           | 1963        | 0.68<br>(0.56–0.81) |
| Halton           | 1964        | 0.67<br>(0.55–0.8)  |
| Halton           | 1965        | 0.66<br>(0.54–0.79) |
| Halton           | 1966        | 0.68<br>(0.56–0.82) |
| Halton           | 1967        | 0.68<br>(0.55–0.81) |
| Halton           | 1968        | 0.72<br>(0.58–0.86) |
| Halton           | 1969        | 0.73<br>(0.6–0.88)  |
| Halton           | 1970        | 0.77<br>(0.63–0.92) |
| Halton           | 1971        | 0.8<br>(0.67–0.95)  |
| Halton           | 1972        | 0.81<br>(0.68–0.96) |
| Halton           | 1973        | 0.83<br>(0.7–0.96)  |
| Halton           | 1974        | 0.85<br>(0.73–0.98) |
| Halton           | 1975        | 0.86<br>(0.74–0.99) |
| Halton           | 1976        | 0.84<br>(0.72–0.97) |
| Halton           | 1977        | 0.87<br>(0.75–0.99) |
| Halton           | 1978        | 0.92<br>(0.82–1.04) |
| Halton           | 1979        | 0.95<br>(0.85–1.06) |



**Table 15 Ratio of adjusted to unadjusted 5q0 values for scaled locations by year**

| <b>Geography</b> | <b>Year</b> | <b>Ratio</b>        |
|------------------|-------------|---------------------|
| Halton           | 1980        | 0.95<br>(0.86–1.03) |
| Halton           | 1981        | 0.91<br>(0.84–0.98) |
| Halton           | 1982        | 0.97<br>(0.9–1.04)  |
| Halton           | 1983        | 0.95<br>(0.89–1.02) |
| Halton           | 1984        | 0.92<br>(0.86–0.98) |
| Halton           | 1985        | 0.97<br>(0.9–1.03)  |
| Halton           | 1986        | 1.01<br>(0.96–1.08) |
| Halton           | 1987        | 1.02<br>(0.94–1.1)  |
| Halton           | 1988        | 1.04<br>(0.98–1.11) |
| Halton           | 1989        | 1.02<br>(0.95–1.08) |
| Halton           | 1990        | 1.02<br>(0.94–1.1)  |
| Halton           | 1991        | 1.0<br>(0.93–1.06)  |
| Halton           | 1992        | 0.92<br>(0.85–0.98) |
| Halton           | 1993        | 0.91<br>(0.85–0.98) |
| Halton           | 1994        | 0.92<br>(0.84–1.0)  |
| Halton           | 1995        | 0.95<br>(0.87–1.04) |
| Halton           | 1996        | 0.99<br>(0.91–1.08) |
| Halton           | 1997        | 1.01<br>(0.93–1.1)  |
| Halton           | 1998        | 0.99<br>(0.91–1.08) |
| Halton           | 1999        | 1.04<br>(0.95–1.14) |
| Halton           | 2000        | 1.01<br>(0.92–1.12) |
| Halton           | 2001        | 1.0<br>(0.93–1.09)  |
| Halton           | 2002        | 0.99<br>(0.91–1.08) |
| Halton           | 2003        | 1.06<br>(0.97–1.16) |
| Halton           | 2004        | 1.02<br>(0.94–1.12) |
| Halton           | 2005        | 1.04<br>(0.94–1.14) |
| Halton           | 2006        | 1.07<br>(0.97–1.17) |
| Halton           | 2007        | 1.05<br>(0.95–1.17) |
| Halton           | 2008        | 1.04<br>(0.95–1.15) |
| Halton           | 2009        | 1.02<br>(0.93–1.11) |
| Halton           | 2010        | 0.99<br>(0.91–1.08) |

**Table 15 Ratio of adjusted to unadjusted 5q0 values for scaled locations by year**

| <b>Geography</b> | <b>Year</b> | <b>Ratio</b>        |
|------------------|-------------|---------------------|
| Halton           | 2011        | 1.0<br>(0.91–1.1)   |
| Halton           | 2012        | 0.97<br>(0.88–1.06) |
| Halton           | 2013        | 0.94<br>(0.86–1.02) |
| Halton           | 2014        | 0.96<br>(0.86–1.06) |
| Halton           | 2015        | 0.99<br>(0.88–1.1)  |
| Halton           | 2016        | 1.04<br>(0.95–1.15) |
| Halton           | 2017        | 1.06<br>(0.9–1.23)  |
| Knowsley         | 1950        | 0.57<br>(0.47–0.68) |
| Knowsley         | 1951        | 0.67<br>(0.55–0.8)  |
| Knowsley         | 1952        | 0.63<br>(0.52–0.75) |
| Knowsley         | 1953        | 0.64<br>(0.52–0.76) |
| Knowsley         | 1954        | 0.6<br>(0.5–0.71)   |
| Knowsley         | 1955        | 0.6<br>(0.51–0.71)  |
| Knowsley         | 1956        | 0.6<br>(0.5–0.7)    |
| Knowsley         | 1957        | 0.61<br>(0.52–0.72) |
| Knowsley         | 1958        | 0.61<br>(0.51–0.71) |
| Knowsley         | 1959        | 0.61<br>(0.51–0.72) |
| Knowsley         | 1960        | 0.63<br>(0.53–0.74) |
| Knowsley         | 1961        | 0.64<br>(0.54–0.77) |
| Knowsley         | 1962        | 0.67<br>(0.55–0.8)  |
| Knowsley         | 1963        | 0.68<br>(0.56–0.81) |
| Knowsley         | 1964        | 0.67<br>(0.55–0.8)  |
| Knowsley         | 1965        | 0.66<br>(0.54–0.79) |
| Knowsley         | 1966        | 0.68<br>(0.56–0.82) |
| Knowsley         | 1967        | 0.68<br>(0.55–0.81) |
| Knowsley         | 1968        | 0.72<br>(0.58–0.86) |
| Knowsley         | 1969        | 0.74<br>(0.6–0.88)  |
| Knowsley         | 1970        | 0.77<br>(0.63–0.92) |
| Knowsley         | 1971        | 0.8<br>(0.67–0.95)  |
| Knowsley         | 1972        | 0.81<br>(0.68–0.96) |
| Knowsley         | 1973        | 0.83<br>(0.7–0.96)  |

**Table 15 Ratio of adjusted to unadjusted 5q0 values for scaled locations by year**

| <b>Geography</b> | <b>Year</b> | <b>Ratio</b>        |
|------------------|-------------|---------------------|
| Knowsley         | 1974        | 0.85<br>(0.73–0.98) |
| Knowsley         | 1975        | 0.86<br>(0.74–0.99) |
| Knowsley         | 1976        | 0.84<br>(0.72–0.97) |
| Knowsley         | 1977        | 0.87<br>(0.76–0.99) |
| Knowsley         | 1978        | 0.92<br>(0.82–1.04) |
| Knowsley         | 1979        | 0.95<br>(0.85–1.06) |
| Knowsley         | 1980        | 0.95<br>(0.86–1.03) |
| Knowsley         | 1981        | 0.91<br>(0.84–0.98) |
| Knowsley         | 1982        | 0.97<br>(0.9–1.04)  |
| Knowsley         | 1983        | 0.95<br>(0.89–1.02) |
| Knowsley         | 1984        | 0.92<br>(0.86–0.98) |
| Knowsley         | 1985        | 0.97<br>(0.9–1.03)  |
| Knowsley         | 1986        | 1.01<br>(0.96–1.08) |
| Knowsley         | 1987        | 1.02<br>(0.94–1.1)  |
| Knowsley         | 1988        | 1.04<br>(0.98–1.11) |
| Knowsley         | 1989        | 1.02<br>(0.95–1.08) |
| Knowsley         | 1990        | 1.02<br>(0.94–1.1)  |
| Knowsley         | 1991        | 1.0<br>(0.93–1.06)  |
| Knowsley         | 1992        | 0.92<br>(0.85–0.98) |
| Knowsley         | 1993        | 0.91<br>(0.85–0.98) |
| Knowsley         | 1994        | 0.92<br>(0.84–1.0)  |
| Knowsley         | 1995        | 0.95<br>(0.87–1.04) |
| Knowsley         | 1996        | 0.99<br>(0.91–1.08) |
| Knowsley         | 1997        | 1.01<br>(0.93–1.1)  |
| Knowsley         | 1998        | 0.99<br>(0.91–1.08) |
| Knowsley         | 1999        | 1.04<br>(0.95–1.14) |
| Knowsley         | 2000        | 1.01<br>(0.92–1.12) |
| Knowsley         | 2001        | 1.0<br>(0.93–1.09)  |
| Knowsley         | 2002        | 0.99<br>(0.91–1.08) |
| Knowsley         | 2003        | 1.06<br>(0.97–1.16) |
| Knowsley         | 2004        | 1.02<br>(0.94–1.12) |

**Table 15 Ratio of adjusted to unadjusted 5q0 values for scaled locations by year**

| <b>Geography</b> | <b>Year</b> | <b>Ratio</b>        |
|------------------|-------------|---------------------|
| Knowsley         | 2005        | 1.04<br>(0.94–1.14) |
| Knowsley         | 2006        | 1.07<br>(0.97–1.17) |
| Knowsley         | 2007        | 1.05<br>(0.95–1.17) |
| Knowsley         | 2008        | 1.04<br>(0.95–1.15) |
| Knowsley         | 2009        | 1.02<br>(0.93–1.11) |
| Knowsley         | 2010        | 0.99<br>(0.91–1.08) |
| Knowsley         | 2011        | 1.0<br>(0.91–1.1)   |
| Knowsley         | 2012        | 0.97<br>(0.88–1.06) |
| Knowsley         | 2013        | 0.94<br>(0.86–1.02) |
| Knowsley         | 2014        | 0.96<br>(0.86–1.06) |
| Knowsley         | 2015        | 0.99<br>(0.88–1.1)  |
| Knowsley         | 2016        | 1.04<br>(0.95–1.15) |
| Knowsley         | 2017        | 1.06<br>(0.9–1.23)  |
| Lancashire       | 1950        | 0.57<br>(0.47–0.68) |
| Lancashire       | 1951        | 0.67<br>(0.55–0.8)  |
| Lancashire       | 1952        | 0.63<br>(0.52–0.75) |
| Lancashire       | 1953        | 0.64<br>(0.52–0.76) |
| Lancashire       | 1954        | 0.6<br>(0.5–0.71)   |
| Lancashire       | 1955        | 0.6<br>(0.51–0.71)  |
| Lancashire       | 1956        | 0.6<br>(0.5–0.7)    |
| Lancashire       | 1957        | 0.61<br>(0.52–0.72) |
| Lancashire       | 1958        | 0.61<br>(0.51–0.71) |
| Lancashire       | 1959        | 0.61<br>(0.51–0.72) |
| Lancashire       | 1960        | 0.63<br>(0.53–0.74) |
| Lancashire       | 1961        | 0.64<br>(0.54–0.77) |
| Lancashire       | 1962        | 0.67<br>(0.56–0.8)  |
| Lancashire       | 1963        | 0.68<br>(0.56–0.81) |
| Lancashire       | 1964        | 0.67<br>(0.55–0.8)  |
| Lancashire       | 1965        | 0.66<br>(0.54–0.79) |
| Lancashire       | 1966        | 0.68<br>(0.56–0.82) |
| Lancashire       | 1967        | 0.68<br>(0.55–0.81) |

**Table 15 Ratio of adjusted to unadjusted 5q0 values for scaled locations by year**

| <b>Geography</b> | <b>Year</b> | <b>Ratio</b>        |
|------------------|-------------|---------------------|
| Lancashire       | 1968        | 0.72<br>(0.58–0.86) |
| Lancashire       | 1969        | 0.73<br>(0.6–0.88)  |
| Lancashire       | 1970        | 0.77<br>(0.63–0.92) |
| Lancashire       | 1971        | 0.8<br>(0.67–0.95)  |
| Lancashire       | 1972        | 0.81<br>(0.68–0.96) |
| Lancashire       | 1973        | 0.83<br>(0.7–0.96)  |
| Lancashire       | 1974        | 0.85<br>(0.73–0.98) |
| Lancashire       | 1975        | 0.86<br>(0.74–0.99) |
| Lancashire       | 1976        | 0.84<br>(0.72–0.97) |
| Lancashire       | 1977        | 0.87<br>(0.75–0.99) |
| Lancashire       | 1978        | 0.92<br>(0.82–1.04) |
| Lancashire       | 1979        | 0.95<br>(0.85–1.06) |
| Lancashire       | 1980        | 0.95<br>(0.86–1.03) |
| Lancashire       | 1981        | 0.91<br>(0.84–0.98) |
| Lancashire       | 1982        | 0.97<br>(0.9–1.04)  |
| Lancashire       | 1983        | 0.95<br>(0.89–1.02) |
| Lancashire       | 1984        | 0.92<br>(0.86–0.98) |
| Lancashire       | 1985        | 0.97<br>(0.9–1.03)  |
| Lancashire       | 1986        | 1.01<br>(0.96–1.08) |
| Lancashire       | 1987        | 1.02<br>(0.94–1.1)  |
| Lancashire       | 1988        | 1.04<br>(0.98–1.11) |
| Lancashire       | 1989        | 1.02<br>(0.95–1.08) |
| Lancashire       | 1990        | 1.02<br>(0.94–1.1)  |
| Lancashire       | 1991        | 1.0<br>(0.93–1.06)  |
| Lancashire       | 1992        | 0.92<br>(0.85–0.98) |
| Lancashire       | 1993        | 0.91<br>(0.85–0.98) |
| Lancashire       | 1994        | 0.92<br>(0.84–1.0)  |
| Lancashire       | 1995        | 0.95<br>(0.87–1.04) |
| Lancashire       | 1996        | 0.99<br>(0.91–1.08) |
| Lancashire       | 1997        | 1.01<br>(0.93–1.1)  |
| Lancashire       | 1998        | 0.99<br>(0.91–1.08) |

**Table 15 Ratio of adjusted to unadjusted 5q0 values for scaled locations by year**

| <b>Geography</b> | <b>Year</b> | <b>Ratio</b>        |
|------------------|-------------|---------------------|
| Lancashire       | 1999        | 1.04<br>(0.95–1.14) |
| Lancashire       | 2000        | 1.01<br>(0.92–1.12) |
| Lancashire       | 2001        | 1.0<br>(0.93–1.09)  |
| Lancashire       | 2002        | 0.99<br>(0.91–1.08) |
| Lancashire       | 2003        | 1.06<br>(0.97–1.16) |
| Lancashire       | 2004        | 1.02<br>(0.94–1.12) |
| Lancashire       | 2005        | 1.04<br>(0.94–1.14) |
| Lancashire       | 2006        | 1.07<br>(0.97–1.17) |
| Lancashire       | 2007        | 1.05<br>(0.95–1.17) |
| Lancashire       | 2008        | 1.04<br>(0.95–1.15) |
| Lancashire       | 2009        | 1.02<br>(0.93–1.11) |
| Lancashire       | 2010        | 0.99<br>(0.91–1.08) |
| Lancashire       | 2011        | 1.0<br>(0.91–1.1)   |
| Lancashire       | 2012        | 0.97<br>(0.88–1.06) |
| Lancashire       | 2013        | 0.94<br>(0.86–1.02) |
| Lancashire       | 2014        | 0.96<br>(0.86–1.06) |
| Lancashire       | 2015        | 0.99<br>(0.88–1.1)  |
| Lancashire       | 2016        | 1.04<br>(0.95–1.15) |
| Lancashire       | 2017        | 1.06<br>(0.9–1.23)  |
| Liverpool        | 1950        | 0.57<br>(0.47–0.68) |
| Liverpool        | 1951        | 0.67<br>(0.55–0.8)  |
| Liverpool        | 1952        | 0.63<br>(0.52–0.75) |
| Liverpool        | 1953        | 0.64<br>(0.52–0.76) |
| Liverpool        | 1954        | 0.6<br>(0.5–0.71)   |
| Liverpool        | 1955        | 0.6<br>(0.51–0.71)  |
| Liverpool        | 1956        | 0.6<br>(0.5–0.7)    |
| Liverpool        | 1957        | 0.61<br>(0.52–0.72) |
| Liverpool        | 1958        | 0.61<br>(0.51–0.71) |
| Liverpool        | 1959        | 0.61<br>(0.51–0.72) |
| Liverpool        | 1960        | 0.63<br>(0.52–0.74) |
| Liverpool        | 1961        | 0.64<br>(0.54–0.77) |

**Table 15 Ratio of adjusted to unadjusted 5q0 values for scaled locations by year**

| <b>Geography</b> | <b>Year</b> | <b>Ratio</b>        |
|------------------|-------------|---------------------|
| Liverpool        | 1962        | 0.67<br>(0.55–0.8)  |
| Liverpool        | 1963        | 0.68<br>(0.56–0.81) |
| Liverpool        | 1964        | 0.67<br>(0.55–0.8)  |
| Liverpool        | 1965        | 0.66<br>(0.54–0.79) |
| Liverpool        | 1966        | 0.68<br>(0.56–0.82) |
| Liverpool        | 1967        | 0.68<br>(0.55–0.81) |
| Liverpool        | 1968        | 0.72<br>(0.58–0.86) |
| Liverpool        | 1969        | 0.73<br>(0.6–0.88)  |
| Liverpool        | 1970        | 0.77<br>(0.63–0.92) |
| Liverpool        | 1971        | 0.8<br>(0.67–0.95)  |
| Liverpool        | 1972        | 0.81<br>(0.68–0.96) |
| Liverpool        | 1973        | 0.83<br>(0.7–0.96)  |
| Liverpool        | 1974        | 0.85<br>(0.73–0.98) |
| Liverpool        | 1975        | 0.86<br>(0.74–0.99) |
| Liverpool        | 1976        | 0.84<br>(0.72–0.97) |
| Liverpool        | 1977        | 0.87<br>(0.76–0.99) |
| Liverpool        | 1978        | 0.92<br>(0.82–1.04) |
| Liverpool        | 1979        | 0.95<br>(0.85–1.06) |
| Liverpool        | 1980        | 0.95<br>(0.86–1.03) |
| Liverpool        | 1981        | 0.91<br>(0.84–0.98) |
| Liverpool        | 1982        | 0.97<br>(0.9–1.04)  |
| Liverpool        | 1983        | 0.95<br>(0.89–1.02) |
| Liverpool        | 1984        | 0.92<br>(0.86–0.98) |
| Liverpool        | 1985        | 0.97<br>(0.9–1.03)  |
| Liverpool        | 1986        | 1.01<br>(0.96–1.08) |
| Liverpool        | 1987        | 1.02<br>(0.94–1.1)  |
| Liverpool        | 1988        | 1.04<br>(0.98–1.11) |
| Liverpool        | 1989        | 1.02<br>(0.95–1.08) |
| Liverpool        | 1990        | 1.02<br>(0.94–1.1)  |
| Liverpool        | 1991        | 1.0<br>(0.93–1.06)  |
| Liverpool        | 1992        | 0.92<br>(0.85–0.98) |

**Table 15 Ratio of adjusted to unadjusted 5q0 values for scaled locations by year**

| <b>Geography</b> | <b>Year</b> | <b>Ratio</b>        |
|------------------|-------------|---------------------|
| Liverpool        | 1993        | 0.91<br>(0.85–0.98) |
| Liverpool        | 1994        | 0.92<br>(0.84–1.0)  |
| Liverpool        | 1995        | 0.95<br>(0.87–1.04) |
| Liverpool        | 1996        | 0.99<br>(0.91–1.08) |
| Liverpool        | 1997        | 1.01<br>(0.93–1.1)  |
| Liverpool        | 1998        | 0.99<br>(0.91–1.08) |
| Liverpool        | 1999        | 1.04<br>(0.95–1.14) |
| Liverpool        | 2000        | 1.01<br>(0.92–1.12) |
| Liverpool        | 2001        | 1.0<br>(0.93–1.09)  |
| Liverpool        | 2002        | 0.99<br>(0.91–1.08) |
| Liverpool        | 2003        | 1.06<br>(0.97–1.16) |
| Liverpool        | 2004        | 1.02<br>(0.94–1.12) |
| Liverpool        | 2005        | 1.04<br>(0.94–1.14) |
| Liverpool        | 2006        | 1.07<br>(0.97–1.17) |
| Liverpool        | 2007        | 1.05<br>(0.95–1.17) |
| Liverpool        | 2008        | 1.04<br>(0.95–1.15) |
| Liverpool        | 2009        | 1.02<br>(0.93–1.11) |
| Liverpool        | 2010        | 0.99<br>(0.91–1.08) |
| Liverpool        | 2011        | 1.0<br>(0.91–1.1)   |
| Liverpool        | 2012        | 0.97<br>(0.88–1.06) |
| Liverpool        | 2013        | 0.94<br>(0.86–1.02) |
| Liverpool        | 2014        | 0.96<br>(0.86–1.06) |
| Liverpool        | 2015        | 0.99<br>(0.88–1.1)  |
| Liverpool        | 2016        | 1.04<br>(0.95–1.15) |
| Liverpool        | 2017        | 1.06<br>(0.9–1.23)  |
| Manchester       | 1950        | 0.57<br>(0.47–0.68) |
| Manchester       | 1951        | 0.67<br>(0.55–0.8)  |
| Manchester       | 1952        | 0.63<br>(0.52–0.75) |
| Manchester       | 1953        | 0.64<br>(0.52–0.76) |
| Manchester       | 1954        | 0.6<br>(0.5–0.71)   |
| Manchester       | 1955        | 0.61<br>(0.51–0.71) |



**Table 15 Ratio of adjusted to unadjusted 5q0 values for scaled locations by year**

| <b>Geography</b> | <b>Year</b> | <b>Ratio</b>        |
|------------------|-------------|---------------------|
| Manchester       | 1956        | 0.6<br>(0.5–0.7)    |
| Manchester       | 1957        | 0.61<br>(0.52–0.72) |
| Manchester       | 1958        | 0.61<br>(0.51–0.71) |
| Manchester       | 1959        | 0.61<br>(0.51–0.72) |
| Manchester       | 1960        | 0.63<br>(0.53–0.74) |
| Manchester       | 1961        | 0.64<br>(0.54–0.77) |
| Manchester       | 1962        | 0.67<br>(0.56–0.8)  |
| Manchester       | 1963        | 0.68<br>(0.56–0.81) |
| Manchester       | 1964        | 0.67<br>(0.55–0.8)  |
| Manchester       | 1965        | 0.66<br>(0.54–0.79) |
| Manchester       | 1966        | 0.68<br>(0.56–0.82) |
| Manchester       | 1967        | 0.68<br>(0.55–0.81) |
| Manchester       | 1968        | 0.72<br>(0.59–0.86) |
| Manchester       | 1969        | 0.74<br>(0.6–0.88)  |
| Manchester       | 1970        | 0.77<br>(0.63–0.92) |
| Manchester       | 1971        | 0.8<br>(0.67–0.95)  |
| Manchester       | 1972        | 0.81<br>(0.68–0.96) |
| Manchester       | 1973        | 0.83<br>(0.7–0.96)  |
| Manchester       | 1974        | 0.85<br>(0.73–0.98) |
| Manchester       | 1975        | 0.86<br>(0.74–0.99) |
| Manchester       | 1976        | 0.84<br>(0.72–0.97) |
| Manchester       | 1977        | 0.87<br>(0.76–0.99) |
| Manchester       | 1978        | 0.92<br>(0.82–1.04) |
| Manchester       | 1979        | 0.95<br>(0.86–1.06) |
| Manchester       | 1980        | 0.95<br>(0.86–1.03) |
| Manchester       | 1981        | 0.91<br>(0.84–0.98) |
| Manchester       | 1982        | 0.97<br>(0.9–1.04)  |
| Manchester       | 1983        | 0.95<br>(0.89–1.02) |
| Manchester       | 1984        | 0.92<br>(0.86–0.98) |
| Manchester       | 1985        | 0.97<br>(0.9–1.03)  |
| Manchester       | 1986        | 1.01<br>(0.96–1.08) |

**Table 15 Ratio of adjusted to unadjusted 5q0 values for scaled locations by year**

| <b>Geography</b> | <b>Year</b> | <b>Ratio</b>        |
|------------------|-------------|---------------------|
| Manchester       | 1987        | 1.02<br>(0.94–1.1)  |
| Manchester       | 1988        | 1.04<br>(0.98–1.11) |
| Manchester       | 1989        | 1.02<br>(0.95–1.08) |
| Manchester       | 1990        | 1.02<br>(0.94–1.1)  |
| Manchester       | 1991        | 1.0<br>(0.93–1.06)  |
| Manchester       | 1992        | 0.92<br>(0.85–0.98) |
| Manchester       | 1993        | 0.91<br>(0.85–0.98) |
| Manchester       | 1994        | 0.92<br>(0.84–1.0)  |
| Manchester       | 1995        | 0.95<br>(0.87–1.04) |
| Manchester       | 1996        | 0.99<br>(0.91–1.08) |
| Manchester       | 1997        | 1.01<br>(0.93–1.1)  |
| Manchester       | 1998        | 0.99<br>(0.91–1.08) |
| Manchester       | 1999        | 1.04<br>(0.95–1.14) |
| Manchester       | 2000        | 1.01<br>(0.92–1.12) |
| Manchester       | 2001        | 1.0<br>(0.93–1.09)  |
| Manchester       | 2002        | 0.99<br>(0.91–1.08) |
| Manchester       | 2003        | 1.06<br>(0.97–1.16) |
| Manchester       | 2004        | 1.02<br>(0.94–1.12) |
| Manchester       | 2005        | 1.04<br>(0.94–1.14) |
| Manchester       | 2006        | 1.07<br>(0.97–1.17) |
| Manchester       | 2007        | 1.05<br>(0.95–1.17) |
| Manchester       | 2008        | 1.04<br>(0.95–1.15) |
| Manchester       | 2009        | 1.02<br>(0.93–1.11) |
| Manchester       | 2010        | 0.99<br>(0.91–1.08) |
| Manchester       | 2011        | 1.0<br>(0.91–1.1)   |
| Manchester       | 2012        | 0.97<br>(0.88–1.06) |
| Manchester       | 2013        | 0.94<br>(0.86–1.02) |
| Manchester       | 2014        | 0.96<br>(0.86–1.06) |
| Manchester       | 2015        | 0.99<br>(0.88–1.1)  |
| Manchester       | 2016        | 1.04<br>(0.95–1.15) |
| Manchester       | 2017        | 1.06<br>(0.9–1.23)  |

**Table 15 Ratio of adjusted to unadjusted 5q0 values for scaled locations by year**

| <b>Geography</b> | <b>Year</b> | <b>Ratio</b>        |
|------------------|-------------|---------------------|
| Oldham           | 1950        | 0.57<br>(0.47–0.69) |
| Oldham           | 1951        | 0.67<br>(0.55–0.8)  |
| Oldham           | 1952        | 0.63<br>(0.52–0.75) |
| Oldham           | 1953        | 0.64<br>(0.52–0.76) |
| Oldham           | 1954        | 0.6<br>(0.5–0.71)   |
| Oldham           | 1955        | 0.61<br>(0.51–0.71) |
| Oldham           | 1956        | 0.6<br>(0.5–0.7)    |
| Oldham           | 1957        | 0.61<br>(0.52–0.72) |
| Oldham           | 1958        | 0.61<br>(0.51–0.71) |
| Oldham           | 1959        | 0.61<br>(0.51–0.72) |
| Oldham           | 1960        | 0.63<br>(0.53–0.74) |
| Oldham           | 1961        | 0.64<br>(0.54–0.77) |
| Oldham           | 1962        | 0.67<br>(0.56–0.8)  |
| Oldham           | 1963        | 0.68<br>(0.56–0.81) |
| Oldham           | 1964        | 0.67<br>(0.55–0.8)  |
| Oldham           | 1965        | 0.66<br>(0.54–0.79) |
| Oldham           | 1966        | 0.68<br>(0.56–0.82) |
| Oldham           | 1967        | 0.68<br>(0.55–0.81) |
| Oldham           | 1968        | 0.72<br>(0.59–0.86) |
| Oldham           | 1969        | 0.74<br>(0.6–0.88)  |
| Oldham           | 1970        | 0.77<br>(0.63–0.92) |
| Oldham           | 1971        | 0.8<br>(0.67–0.95)  |
| Oldham           | 1972        | 0.81<br>(0.68–0.96) |
| Oldham           | 1973        | 0.83<br>(0.7–0.96)  |
| Oldham           | 1974        | 0.85<br>(0.73–0.98) |
| Oldham           | 1975        | 0.86<br>(0.74–0.99) |
| Oldham           | 1976        | 0.84<br>(0.72–0.97) |
| Oldham           | 1977        | 0.87<br>(0.76–0.99) |
| Oldham           | 1978        | 0.92<br>(0.82–1.04) |
| Oldham           | 1979        | 0.95<br>(0.86–1.06) |
| Oldham           | 1980        | 0.95<br>(0.86–1.03) |

**Table 15 Ratio of adjusted to unadjusted 5q0 values for scaled locations by year**

| <b>Geography</b> | <b>Year</b> | <b>Ratio</b>        |
|------------------|-------------|---------------------|
| Oldham           | 1981        | 0.91<br>(0.84–0.98) |
| Oldham           | 1982        | 0.97<br>(0.9–1.04)  |
| Oldham           | 1983        | 0.95<br>(0.89–1.02) |
| Oldham           | 1984        | 0.92<br>(0.86–0.98) |
| Oldham           | 1985        | 0.97<br>(0.9–1.03)  |
| Oldham           | 1986        | 1.01<br>(0.96–1.08) |
| Oldham           | 1987        | 1.02<br>(0.94–1.1)  |
| Oldham           | 1988        | 1.04<br>(0.98–1.11) |
| Oldham           | 1989        | 1.02<br>(0.95–1.08) |
| Oldham           | 1990        | 1.02<br>(0.94–1.1)  |
| Oldham           | 1991        | 1.0<br>(0.93–1.06)  |
| Oldham           | 1992        | 0.92<br>(0.85–0.98) |
| Oldham           | 1993        | 0.91<br>(0.85–0.98) |
| Oldham           | 1994        | 0.92<br>(0.84–1.0)  |
| Oldham           | 1995        | 0.95<br>(0.87–1.04) |
| Oldham           | 1996        | 0.99<br>(0.91–1.08) |
| Oldham           | 1997        | 1.01<br>(0.93–1.1)  |
| Oldham           | 1998        | 0.99<br>(0.91–1.08) |
| Oldham           | 1999        | 1.04<br>(0.95–1.14) |
| Oldham           | 2000        | 1.01<br>(0.92–1.12) |
| Oldham           | 2001        | 1.0<br>(0.93–1.09)  |
| Oldham           | 2002        | 0.99<br>(0.91–1.08) |
| Oldham           | 2003        | 1.06<br>(0.97–1.16) |
| Oldham           | 2004        | 1.02<br>(0.94–1.12) |
| Oldham           | 2005        | 1.04<br>(0.94–1.14) |
| Oldham           | 2006        | 1.07<br>(0.97–1.17) |
| Oldham           | 2007        | 1.05<br>(0.95–1.17) |
| Oldham           | 2008        | 1.04<br>(0.95–1.15) |
| Oldham           | 2009        | 1.02<br>(0.93–1.11) |
| Oldham           | 2010        | 0.99<br>(0.91–1.08) |
| Oldham           | 2011        | 1.0<br>(0.91–1.1)   |

**Table 15 Ratio of adjusted to unadjusted 5q0 values for scaled locations by year**

| <b>Geography</b> | <b>Year</b> | <b>Ratio</b>        |
|------------------|-------------|---------------------|
| Oldham           | 2012        | 0.97<br>(0.88–1.06) |
| Oldham           | 2013        | 0.94<br>(0.86–1.02) |
| Oldham           | 2014        | 0.96<br>(0.86–1.06) |
| Oldham           | 2015        | 0.99<br>(0.88–1.1)  |
| Oldham           | 2016        | 1.04<br>(0.95–1.15) |
| Oldham           | 2017        | 1.06<br>(0.9–1.23)  |
| Rochdale         | 1950        | 0.57<br>(0.48–0.69) |
| Rochdale         | 1951        | 0.67<br>(0.55–0.8)  |
| Rochdale         | 1952        | 0.63<br>(0.52–0.75) |
| Rochdale         | 1953        | 0.64<br>(0.53–0.76) |
| Rochdale         | 1954        | 0.6<br>(0.5–0.71)   |
| Rochdale         | 1955        | 0.61<br>(0.51–0.71) |
| Rochdale         | 1956        | 0.6<br>(0.5–0.7)    |
| Rochdale         | 1957        | 0.61<br>(0.52–0.72) |
| Rochdale         | 1958        | 0.61<br>(0.51–0.71) |
| Rochdale         | 1959        | 0.61<br>(0.51–0.72) |
| Rochdale         | 1960        | 0.63<br>(0.53–0.74) |
| Rochdale         | 1961        | 0.64<br>(0.54–0.77) |
| Rochdale         | 1962        | 0.67<br>(0.56–0.8)  |
| Rochdale         | 1963        | 0.68<br>(0.56–0.81) |
| Rochdale         | 1964        | 0.67<br>(0.55–0.8)  |
| Rochdale         | 1965        | 0.66<br>(0.54–0.79) |
| Rochdale         | 1966        | 0.68<br>(0.56–0.82) |
| Rochdale         | 1967        | 0.68<br>(0.55–0.81) |
| Rochdale         | 1968        | 0.72<br>(0.59–0.86) |
| Rochdale         | 1969        | 0.74<br>(0.6–0.88)  |
| Rochdale         | 1970        | 0.77<br>(0.63–0.92) |
| Rochdale         | 1971        | 0.8<br>(0.67–0.95)  |
| Rochdale         | 1972        | 0.81<br>(0.68–0.96) |
| Rochdale         | 1973        | 0.83<br>(0.7–0.96)  |
| Rochdale         | 1974        | 0.85<br>(0.73–0.98) |

**Table 15 Ratio of adjusted to unadjusted 5q0 values for scaled locations by year**

| <b>Geography</b> | <b>Year</b> | <b>Ratio</b>        |
|------------------|-------------|---------------------|
| Rochdale         | 1975        | 0.86<br>(0.74–0.99) |
| Rochdale         | 1976        | 0.84<br>(0.72–0.97) |
| Rochdale         | 1977        | 0.87<br>(0.76–0.99) |
| Rochdale         | 1978        | 0.92<br>(0.82–1.04) |
| Rochdale         | 1979        | 0.95<br>(0.86–1.06) |
| Rochdale         | 1980        | 0.95<br>(0.86–1.03) |
| Rochdale         | 1981        | 0.91<br>(0.84–0.98) |
| Rochdale         | 1982        | 0.97<br>(0.9–1.04)  |
| Rochdale         | 1983        | 0.95<br>(0.89–1.02) |
| Rochdale         | 1984        | 0.92<br>(0.86–0.98) |
| Rochdale         | 1985        | 0.97<br>(0.9–1.03)  |
| Rochdale         | 1986        | 1.01<br>(0.96–1.08) |
| Rochdale         | 1987        | 1.02<br>(0.94–1.1)  |
| Rochdale         | 1988        | 1.04<br>(0.98–1.11) |
| Rochdale         | 1989        | 1.02<br>(0.95–1.08) |
| Rochdale         | 1990        | 1.02<br>(0.94–1.1)  |
| Rochdale         | 1991        | 1.0<br>(0.93–1.06)  |
| Rochdale         | 1992        | 0.92<br>(0.85–0.98) |
| Rochdale         | 1993        | 0.91<br>(0.85–0.98) |
| Rochdale         | 1994        | 0.92<br>(0.84–1.0)  |
| Rochdale         | 1995        | 0.95<br>(0.87–1.04) |
| Rochdale         | 1996        | 0.99<br>(0.91–1.08) |
| Rochdale         | 1997        | 1.01<br>(0.93–1.1)  |
| Rochdale         | 1998        | 0.99<br>(0.91–1.08) |
| Rochdale         | 1999        | 1.04<br>(0.95–1.14) |
| Rochdale         | 2000        | 1.01<br>(0.92–1.12) |
| Rochdale         | 2001        | 1.0<br>(0.93–1.09)  |
| Rochdale         | 2002        | 0.99<br>(0.91–1.08) |
| Rochdale         | 2003        | 1.06<br>(0.97–1.16) |
| Rochdale         | 2004        | 1.02<br>(0.94–1.12) |
| Rochdale         | 2005        | 1.04<br>(0.94–1.14) |

**Table 15 Ratio of adjusted to unadjusted 5q0 values for scaled locations by year**

| <b>Geography</b> | <b>Year</b> | <b>Ratio</b>        |
|------------------|-------------|---------------------|
| Rochdale         | 2006        | 1.07<br>(0.97–1.17) |
| Rochdale         | 2007        | 1.05<br>(0.95–1.17) |
| Rochdale         | 2008        | 1.04<br>(0.95–1.15) |
| Rochdale         | 2009        | 1.02<br>(0.93–1.11) |
| Rochdale         | 2010        | 0.99<br>(0.91–1.08) |
| Rochdale         | 2011        | 1.0<br>(0.91–1.1)   |
| Rochdale         | 2012        | 0.97<br>(0.88–1.06) |
| Rochdale         | 2013        | 0.94<br>(0.86–1.02) |
| Rochdale         | 2014        | 0.96<br>(0.86–1.06) |
| Rochdale         | 2015        | 0.99<br>(0.88–1.1)  |
| Rochdale         | 2016        | 1.04<br>(0.95–1.15) |
| Rochdale         | 2017        | 1.06<br>(0.9–1.23)  |
| Salford          | 1950        | 0.57<br>(0.47–0.68) |
| Salford          | 1951        | 0.67<br>(0.55–0.8)  |
| Salford          | 1952        | 0.63<br>(0.52–0.75) |
| Salford          | 1953        | 0.64<br>(0.52–0.76) |
| Salford          | 1954        | 0.6<br>(0.5–0.71)   |
| Salford          | 1955        | 0.61<br>(0.51–0.71) |
| Salford          | 1956        | 0.6<br>(0.5–0.7)    |
| Salford          | 1957        | 0.61<br>(0.52–0.72) |
| Salford          | 1958        | 0.61<br>(0.51–0.71) |
| Salford          | 1959        | 0.61<br>(0.51–0.72) |
| Salford          | 1960        | 0.63<br>(0.53–0.74) |
| Salford          | 1961        | 0.64<br>(0.54–0.77) |
| Salford          | 1962        | 0.67<br>(0.55–0.8)  |
| Salford          | 1963        | 0.68<br>(0.56–0.81) |
| Salford          | 1964        | 0.67<br>(0.55–0.8)  |
| Salford          | 1965        | 0.66<br>(0.54–0.79) |
| Salford          | 1966        | 0.68<br>(0.56–0.82) |
| Salford          | 1967        | 0.68<br>(0.55–0.81) |
| Salford          | 1968        | 0.72<br>(0.58–0.86) |

**Table 15 Ratio of adjusted to unadjusted 5q0 values for scaled locations by year**

| <b>Geography</b> | <b>Year</b> | <b>Ratio</b>        |
|------------------|-------------|---------------------|
| Salford          | 1969        | 0.74<br>(0.6–0.88)  |
| Salford          | 1970        | 0.77<br>(0.63–0.92) |
| Salford          | 1971        | 0.8<br>(0.67–0.95)  |
| Salford          | 1972        | 0.81<br>(0.68–0.96) |
| Salford          | 1973        | 0.83<br>(0.7–0.96)  |
| Salford          | 1974        | 0.85<br>(0.73–0.98) |
| Salford          | 1975        | 0.86<br>(0.74–0.99) |
| Salford          | 1976        | 0.84<br>(0.72–0.97) |
| Salford          | 1977        | 0.87<br>(0.76–0.99) |
| Salford          | 1978        | 0.92<br>(0.82–1.04) |
| Salford          | 1979        | 0.95<br>(0.85–1.06) |
| Salford          | 1980        | 0.95<br>(0.86–1.03) |
| Salford          | 1981        | 0.91<br>(0.84–0.98) |
| Salford          | 1982        | 0.97<br>(0.9–1.04)  |
| Salford          | 1983        | 0.95<br>(0.89–1.02) |
| Salford          | 1984        | 0.92<br>(0.86–0.98) |
| Salford          | 1985        | 0.97<br>(0.9–1.03)  |
| Salford          | 1986        | 1.01<br>(0.96–1.08) |
| Salford          | 1987        | 1.02<br>(0.94–1.1)  |
| Salford          | 1988        | 1.04<br>(0.98–1.11) |
| Salford          | 1989        | 1.02<br>(0.95–1.08) |
| Salford          | 1990        | 1.02<br>(0.94–1.1)  |
| Salford          | 1991        | 1.0<br>(0.93–1.06)  |
| Salford          | 1992        | 0.92<br>(0.85–0.98) |
| Salford          | 1993        | 0.91<br>(0.85–0.98) |
| Salford          | 1994        | 0.92<br>(0.84–1.0)  |
| Salford          | 1995        | 0.95<br>(0.87–1.04) |
| Salford          | 1996        | 0.99<br>(0.91–1.08) |
| Salford          | 1997        | 1.01<br>(0.93–1.1)  |
| Salford          | 1998        | 0.99<br>(0.91–1.08) |
| Salford          | 1999        | 1.04<br>(0.95–1.14) |



**Table 15 Ratio of adjusted to unadjusted 5q0 values for scaled locations by year**

| <b>Geography</b> | <b>Year</b> | <b>Ratio</b>        |
|------------------|-------------|---------------------|
| Salford          | 2000        | 1.01<br>(0.92–1.12) |
| Salford          | 2001        | 1.0<br>(0.93–1.09)  |
| Salford          | 2002        | 0.99<br>(0.91–1.08) |
| Salford          | 2003        | 1.06<br>(0.97–1.16) |
| Salford          | 2004        | 1.02<br>(0.94–1.12) |
| Salford          | 2005        | 1.04<br>(0.94–1.14) |
| Salford          | 2006        | 1.07<br>(0.97–1.17) |
| Salford          | 2007        | 1.05<br>(0.95–1.17) |
| Salford          | 2008        | 1.04<br>(0.95–1.15) |
| Salford          | 2009        | 1.02<br>(0.93–1.11) |
| Salford          | 2010        | 0.99<br>(0.91–1.08) |
| Salford          | 2011        | 1.0<br>(0.91–1.1)   |
| Salford          | 2012        | 0.97<br>(0.88–1.06) |
| Salford          | 2013        | 0.94<br>(0.86–1.02) |
| Salford          | 2014        | 0.96<br>(0.86–1.06) |
| Salford          | 2015        | 0.99<br>(0.88–1.1)  |
| Salford          | 2016        | 1.04<br>(0.95–1.15) |
| Salford          | 2017        | 1.06<br>(0.9–1.23)  |
| Sefton           | 1950        | 0.57<br>(0.47–0.68) |
| Sefton           | 1951        | 0.67<br>(0.55–0.8)  |
| Sefton           | 1952        | 0.63<br>(0.52–0.75) |
| Sefton           | 1953        | 0.63<br>(0.52–0.76) |
| Sefton           | 1954        | 0.6<br>(0.5–0.71)   |
| Sefton           | 1955        | 0.6<br>(0.51–0.71)  |
| Sefton           | 1956        | 0.6<br>(0.5–0.7)    |
| Sefton           | 1957        | 0.61<br>(0.52–0.72) |
| Sefton           | 1958        | 0.61<br>(0.51–0.71) |
| Sefton           | 1959        | 0.61<br>(0.51–0.72) |
| Sefton           | 1960        | 0.63<br>(0.52–0.74) |
| Sefton           | 1961        | 0.64<br>(0.54–0.77) |
| Sefton           | 1962        | 0.67<br>(0.55–0.8)  |

**Table 15 Ratio of adjusted to unadjusted 5q0 values for scaled locations by year**

| <b>Geography</b> | <b>Year</b> | <b>Ratio</b>        |
|------------------|-------------|---------------------|
| Sefton           | 1963        | 0.68<br>(0.56–0.81) |
| Sefton           | 1964        | 0.67<br>(0.55–0.8)  |
| Sefton           | 1965        | 0.66<br>(0.54–0.79) |
| Sefton           | 1966        | 0.68<br>(0.56–0.82) |
| Sefton           | 1967        | 0.68<br>(0.55–0.81) |
| Sefton           | 1968        | 0.71<br>(0.58–0.86) |
| Sefton           | 1969        | 0.73<br>(0.6–0.88)  |
| Sefton           | 1970        | 0.77<br>(0.63–0.92) |
| Sefton           | 1971        | 0.8<br>(0.67–0.95)  |
| Sefton           | 1972        | 0.81<br>(0.68–0.96) |
| Sefton           | 1973        | 0.83<br>(0.7–0.96)  |
| Sefton           | 1974        | 0.85<br>(0.73–0.98) |
| Sefton           | 1975        | 0.86<br>(0.74–0.99) |
| Sefton           | 1976        | 0.84<br>(0.72–0.97) |
| Sefton           | 1977        | 0.87<br>(0.75–0.99) |
| Sefton           | 1978        | 0.92<br>(0.82–1.04) |
| Sefton           | 1979        | 0.95<br>(0.85–1.06) |
| Sefton           | 1980        | 0.95<br>(0.86–1.03) |
| Sefton           | 1981        | 0.91<br>(0.84–0.98) |
| Sefton           | 1982        | 0.97<br>(0.9–1.04)  |
| Sefton           | 1983        | 0.95<br>(0.89–1.02) |
| Sefton           | 1984        | 0.92<br>(0.86–0.98) |
| Sefton           | 1985        | 0.97<br>(0.9–1.03)  |
| Sefton           | 1986        | 1.01<br>(0.96–1.08) |
| Sefton           | 1987        | 1.02<br>(0.94–1.1)  |
| Sefton           | 1988        | 1.04<br>(0.98–1.11) |
| Sefton           | 1989        | 1.02<br>(0.95–1.08) |
| Sefton           | 1990        | 1.02<br>(0.94–1.1)  |
| Sefton           | 1991        | 1.0<br>(0.93–1.06)  |
| Sefton           | 1992        | 0.92<br>(0.85–0.98) |
| Sefton           | 1993        | 0.91<br>(0.85–0.98) |

**Table 15 Ratio of adjusted to unadjusted 5q0 values for scaled locations by year**

| <b>Geography</b> | <b>Year</b> | <b>Ratio</b>        |
|------------------|-------------|---------------------|
| Sefton           | 1994        | 0.92<br>(0.84–1.0)  |
| Sefton           | 1995        | 0.95<br>(0.87–1.04) |
| Sefton           | 1996        | 0.99<br>(0.91–1.08) |
| Sefton           | 1997        | 1.01<br>(0.93–1.1)  |
| Sefton           | 1998        | 0.99<br>(0.91–1.08) |
| Sefton           | 1999        | 1.04<br>(0.95–1.14) |
| Sefton           | 2000        | 1.01<br>(0.92–1.12) |
| Sefton           | 2001        | 1.0<br>(0.93–1.09)  |
| Sefton           | 2002        | 0.99<br>(0.91–1.08) |
| Sefton           | 2003        | 1.06<br>(0.97–1.16) |
| Sefton           | 2004        | 1.02<br>(0.94–1.12) |
| Sefton           | 2005        | 1.04<br>(0.94–1.14) |
| Sefton           | 2006        | 1.07<br>(0.97–1.17) |
| Sefton           | 2007        | 1.05<br>(0.95–1.17) |
| Sefton           | 2008        | 1.04<br>(0.95–1.15) |
| Sefton           | 2009        | 1.02<br>(0.93–1.11) |
| Sefton           | 2010        | 0.99<br>(0.91–1.08) |
| Sefton           | 2011        | 1.0<br>(0.91–1.1)   |
| Sefton           | 2012        | 0.97<br>(0.88–1.06) |
| Sefton           | 2013        | 0.94<br>(0.86–1.02) |
| Sefton           | 2014        | 0.96<br>(0.86–1.06) |
| Sefton           | 2015        | 0.99<br>(0.88–1.1)  |
| Sefton           | 2016        | 1.04<br>(0.95–1.15) |
| Sefton           | 2017        | 1.06<br>(0.9–1.23)  |
| St Helens        | 1950        | 0.57<br>(0.47–0.68) |
| St Helens        | 1951        | 0.67<br>(0.55–0.8)  |
| St Helens        | 1952        | 0.63<br>(0.52–0.75) |
| St Helens        | 1953        | 0.64<br>(0.52–0.76) |
| St Helens        | 1954        | 0.6<br>(0.5–0.71)   |
| St Helens        | 1955        | 0.6<br>(0.51–0.71)  |
| St Helens        | 1956        | 0.6<br>(0.5–0.7)    |

**Table 15 Ratio of adjusted to unadjusted 5q0 values for scaled locations by year**

| <b>Geography</b> | <b>Year</b> | <b>Ratio</b>        |
|------------------|-------------|---------------------|
| St Helens        | 1957        | 0.61<br>(0.52–0.72) |
| St Helens        | 1958        | 0.61<br>(0.51–0.71) |
| St Helens        | 1959        | 0.61<br>(0.51–0.72) |
| St Helens        | 1960        | 0.63<br>(0.52–0.74) |
| St Helens        | 1961        | 0.64<br>(0.54–0.77) |
| St Helens        | 1962        | 0.67<br>(0.55–0.8)  |
| St Helens        | 1963        | 0.68<br>(0.56–0.81) |
| St Helens        | 1964        | 0.67<br>(0.55–0.8)  |
| St Helens        | 1965        | 0.66<br>(0.54–0.79) |
| St Helens        | 1966        | 0.68<br>(0.56–0.82) |
| St Helens        | 1967        | 0.68<br>(0.55–0.81) |
| St Helens        | 1968        | 0.72<br>(0.58–0.86) |
| St Helens        | 1969        | 0.73<br>(0.6–0.88)  |
| St Helens        | 1970        | 0.77<br>(0.63–0.92) |
| St Helens        | 1971        | 0.8<br>(0.67–0.95)  |
| St Helens        | 1972        | 0.81<br>(0.68–0.96) |
| St Helens        | 1973        | 0.83<br>(0.7–0.96)  |
| St Helens        | 1974        | 0.85<br>(0.73–0.98) |
| St Helens        | 1975        | 0.86<br>(0.74–0.99) |
| St Helens        | 1976        | 0.84<br>(0.72–0.97) |
| St Helens        | 1977        | 0.87<br>(0.75–0.99) |
| St Helens        | 1978        | 0.92<br>(0.82–1.04) |
| St Helens        | 1979        | 0.95<br>(0.85–1.06) |
| St Helens        | 1980        | 0.95<br>(0.86–1.03) |
| St Helens        | 1981        | 0.91<br>(0.84–0.98) |
| St Helens        | 1982        | 0.97<br>(0.9–1.04)  |
| St Helens        | 1983        | 0.95<br>(0.89–1.02) |
| St Helens        | 1984        | 0.92<br>(0.86–0.98) |
| St Helens        | 1985        | 0.97<br>(0.9–1.03)  |
| St Helens        | 1986        | 1.01<br>(0.96–1.08) |
| St Helens        | 1987        | 1.02<br>(0.94–1.1)  |

**Table 15 Ratio of adjusted to unadjusted 5q0 values for scaled locations by year**

| <b>Geography</b> | <b>Year</b> | <b>Ratio</b>        |
|------------------|-------------|---------------------|
| St Helens        | 1988        | 1.04<br>(0.98–1.11) |
| St Helens        | 1989        | 1.02<br>(0.95–1.08) |
| St Helens        | 1990        | 1.02<br>(0.94–1.1)  |
| St Helens        | 1991        | 1.0<br>(0.93–1.06)  |
| St Helens        | 1992        | 0.92<br>(0.85–0.98) |
| St Helens        | 1993        | 0.91<br>(0.85–0.98) |
| St Helens        | 1994        | 0.92<br>(0.84–1.0)  |
| St Helens        | 1995        | 0.95<br>(0.87–1.04) |
| St Helens        | 1996        | 0.99<br>(0.91–1.08) |
| St Helens        | 1997        | 1.01<br>(0.93–1.1)  |
| St Helens        | 1998        | 0.99<br>(0.91–1.08) |
| St Helens        | 1999        | 1.04<br>(0.95–1.14) |
| St Helens        | 2000        | 1.01<br>(0.92–1.12) |
| St Helens        | 2001        | 1.0<br>(0.93–1.09)  |
| St Helens        | 2002        | 0.99<br>(0.91–1.08) |
| St Helens        | 2003        | 1.06<br>(0.97–1.16) |
| St Helens        | 2004        | 1.02<br>(0.94–1.12) |
| St Helens        | 2005        | 1.04<br>(0.94–1.14) |
| St Helens        | 2006        | 1.07<br>(0.97–1.17) |
| St Helens        | 2007        | 1.05<br>(0.95–1.17) |
| St Helens        | 2008        | 1.04<br>(0.95–1.15) |
| St Helens        | 2009        | 1.02<br>(0.93–1.11) |
| St Helens        | 2010        | 0.99<br>(0.91–1.08) |
| St Helens        | 2011        | 1.0<br>(0.91–1.1)   |
| St Helens        | 2012        | 0.97<br>(0.88–1.06) |
| St Helens        | 2013        | 0.94<br>(0.86–1.02) |
| St Helens        | 2014        | 0.96<br>(0.86–1.06) |
| St Helens        | 2015        | 0.99<br>(0.88–1.1)  |
| St Helens        | 2016        | 1.04<br>(0.95–1.15) |
| St Helens        | 2017        | 1.06<br>(0.9–1.23)  |
| Stockport        | 1950        | 0.57<br>(0.47–0.68) |

**Table 15 Ratio of adjusted to unadjusted 5q0 values for scaled locations by year**

| <b>Geography</b> | <b>Year</b> | <b>Ratio</b>        |
|------------------|-------------|---------------------|
| Stockport        | 1951        | 0.67<br>(0.55–0.8)  |
| Stockport        | 1952        | 0.63<br>(0.52–0.75) |
| Stockport        | 1953        | 0.64<br>(0.52–0.76) |
| Stockport        | 1954        | 0.6<br>(0.5–0.71)   |
| Stockport        | 1955        | 0.6<br>(0.51–0.71)  |
| Stockport        | 1956        | 0.6<br>(0.5–0.7)    |
| Stockport        | 1957        | 0.61<br>(0.52–0.72) |
| Stockport        | 1958        | 0.61<br>(0.51–0.71) |
| Stockport        | 1959        | 0.61<br>(0.51–0.72) |
| Stockport        | 1960        | 0.63<br>(0.52–0.74) |
| Stockport        | 1961        | 0.64<br>(0.54–0.77) |
| Stockport        | 1962        | 0.67<br>(0.55–0.8)  |
| Stockport        | 1963        | 0.68<br>(0.56–0.81) |
| Stockport        | 1964        | 0.67<br>(0.55–0.8)  |
| Stockport        | 1965        | 0.66<br>(0.54–0.79) |
| Stockport        | 1966        | 0.68<br>(0.56–0.82) |
| Stockport        | 1967        | 0.68<br>(0.55–0.81) |
| Stockport        | 1968        | 0.72<br>(0.58–0.86) |
| Stockport        | 1969        | 0.73<br>(0.6–0.88)  |
| Stockport        | 1970        | 0.77<br>(0.63–0.92) |
| Stockport        | 1971        | 0.8<br>(0.67–0.95)  |
| Stockport        | 1972        | 0.81<br>(0.68–0.96) |
| Stockport        | 1973        | 0.83<br>(0.7–0.96)  |
| Stockport        | 1974        | 0.85<br>(0.73–0.98) |
| Stockport        | 1975        | 0.86<br>(0.74–0.99) |
| Stockport        | 1976        | 0.84<br>(0.72–0.97) |
| Stockport        | 1977        | 0.87<br>(0.75–0.99) |
| Stockport        | 1978        | 0.92<br>(0.82–1.04) |
| Stockport        | 1979        | 0.95<br>(0.85–1.06) |
| Stockport        | 1980        | 0.95<br>(0.86–1.03) |
| Stockport        | 1981        | 0.91<br>(0.84–0.98) |

**Table 15 Ratio of adjusted to unadjusted 5q0 values for scaled locations by year**

| <b>Geography</b> | <b>Year</b> | <b>Ratio</b>        |
|------------------|-------------|---------------------|
| Stockport        | 1982        | 0.97<br>(0.9–1.04)  |
| Stockport        | 1983        | 0.95<br>(0.89–1.02) |
| Stockport        | 1984        | 0.92<br>(0.86–0.98) |
| Stockport        | 1985        | 0.97<br>(0.9–1.03)  |
| Stockport        | 1986        | 1.01<br>(0.96–1.08) |
| Stockport        | 1987        | 1.02<br>(0.94–1.1)  |
| Stockport        | 1988        | 1.04<br>(0.98–1.11) |
| Stockport        | 1989        | 1.02<br>(0.95–1.08) |
| Stockport        | 1990        | 1.02<br>(0.94–1.1)  |
| Stockport        | 1991        | 1.0<br>(0.93–1.06)  |
| Stockport        | 1992        | 0.92<br>(0.85–0.98) |
| Stockport        | 1993        | 0.91<br>(0.85–0.98) |
| Stockport        | 1994        | 0.92<br>(0.84–1.0)  |
| Stockport        | 1995        | 0.95<br>(0.87–1.04) |
| Stockport        | 1996        | 0.99<br>(0.91–1.08) |
| Stockport        | 1997        | 1.01<br>(0.93–1.1)  |
| Stockport        | 1998        | 0.99<br>(0.91–1.08) |
| Stockport        | 1999        | 1.04<br>(0.95–1.14) |
| Stockport        | 2000        | 1.01<br>(0.92–1.12) |
| Stockport        | 2001        | 1.0<br>(0.93–1.09)  |
| Stockport        | 2002        | 0.99<br>(0.91–1.08) |
| Stockport        | 2003        | 1.06<br>(0.97–1.16) |
| Stockport        | 2004        | 1.02<br>(0.94–1.12) |
| Stockport        | 2005        | 1.04<br>(0.94–1.14) |
| Stockport        | 2006        | 1.07<br>(0.97–1.17) |
| Stockport        | 2007        | 1.05<br>(0.95–1.17) |
| Stockport        | 2008        | 1.04<br>(0.95–1.15) |
| Stockport        | 2009        | 1.02<br>(0.93–1.11) |
| Stockport        | 2010        | 0.99<br>(0.91–1.08) |
| Stockport        | 2011        | 1.0<br>(0.91–1.1)   |
| Stockport        | 2012        | 0.97<br>(0.88–1.06) |

**Table 15 Ratio of adjusted to unadjusted 5q0 values for scaled locations by year**

| <b>Geography</b> | <b>Year</b> | <b>Ratio</b>        |
|------------------|-------------|---------------------|
| Stockport        | 2013        | 0.94<br>(0.86–1.02) |
| Stockport        | 2014        | 0.96<br>(0.86–1.06) |
| Stockport        | 2015        | 0.99<br>(0.88–1.1)  |
| Stockport        | 2016        | 1.04<br>(0.95–1.15) |
| Stockport        | 2017        | 1.06<br>(0.9–1.23)  |
| Tameside         | 1950        | 0.57<br>(0.47–0.68) |
| Tameside         | 1951        | 0.67<br>(0.55–0.8)  |
| Tameside         | 1952        | 0.63<br>(0.52–0.75) |
| Tameside         | 1953        | 0.64<br>(0.52–0.76) |
| Tameside         | 1954        | 0.6<br>(0.5–0.71)   |
| Tameside         | 1955        | 0.61<br>(0.51–0.71) |
| Tameside         | 1956        | 0.6<br>(0.5–0.7)    |
| Tameside         | 1957        | 0.61<br>(0.52–0.72) |
| Tameside         | 1958        | 0.61<br>(0.51–0.71) |
| Tameside         | 1959        | 0.61<br>(0.51–0.72) |
| Tameside         | 1960        | 0.63<br>(0.53–0.74) |
| Tameside         | 1961        | 0.64<br>(0.54–0.77) |
| Tameside         | 1962        | 0.67<br>(0.56–0.8)  |
| Tameside         | 1963        | 0.68<br>(0.56–0.81) |
| Tameside         | 1964        | 0.67<br>(0.55–0.8)  |
| Tameside         | 1965        | 0.66<br>(0.54–0.79) |
| Tameside         | 1966        | 0.68<br>(0.56–0.82) |
| Tameside         | 1967        | 0.68<br>(0.55–0.81) |
| Tameside         | 1968        | 0.72<br>(0.59–0.86) |
| Tameside         | 1969        | 0.74<br>(0.6–0.88)  |
| Tameside         | 1970        | 0.77<br>(0.63–0.92) |
| Tameside         | 1971        | 0.8<br>(0.67–0.95)  |
| Tameside         | 1972        | 0.81<br>(0.68–0.96) |
| Tameside         | 1973        | 0.83<br>(0.7–0.96)  |
| Tameside         | 1974        | 0.85<br>(0.73–0.98) |
| Tameside         | 1975        | 0.86<br>(0.74–0.99) |



**Table 15 Ratio of adjusted to unadjusted 5q0 values for scaled locations by year**

| <b>Geography</b> | <b>Year</b> | <b>Ratio</b>        |
|------------------|-------------|---------------------|
| Tameside         | 1976        | 0.84<br>(0.72–0.97) |
| Tameside         | 1977        | 0.87<br>(0.76–0.99) |
| Tameside         | 1978        | 0.92<br>(0.82–1.04) |
| Tameside         | 1979        | 0.95<br>(0.86–1.06) |
| Tameside         | 1980        | 0.95<br>(0.86–1.03) |
| Tameside         | 1981        | 0.91<br>(0.84–0.98) |
| Tameside         | 1982        | 0.97<br>(0.9–1.04)  |
| Tameside         | 1983        | 0.95<br>(0.89–1.02) |
| Tameside         | 1984        | 0.92<br>(0.86–0.98) |
| Tameside         | 1985        | 0.97<br>(0.9–1.03)  |
| Tameside         | 1986        | 1.01<br>(0.96–1.08) |
| Tameside         | 1987        | 1.02<br>(0.94–1.1)  |
| Tameside         | 1988        | 1.04<br>(0.98–1.11) |
| Tameside         | 1989        | 1.02<br>(0.95–1.08) |
| Tameside         | 1990        | 1.02<br>(0.94–1.1)  |
| Tameside         | 1991        | 1.0<br>(0.93–1.06)  |
| Tameside         | 1992        | 0.92<br>(0.85–0.98) |
| Tameside         | 1993        | 0.91<br>(0.85–0.98) |
| Tameside         | 1994        | 0.92<br>(0.84–1.0)  |
| Tameside         | 1995        | 0.95<br>(0.87–1.04) |
| Tameside         | 1996        | 0.99<br>(0.91–1.08) |
| Tameside         | 1997        | 1.01<br>(0.93–1.1)  |
| Tameside         | 1998        | 0.99<br>(0.91–1.08) |
| Tameside         | 1999        | 1.04<br>(0.95–1.14) |
| Tameside         | 2000        | 1.01<br>(0.92–1.12) |
| Tameside         | 2001        | 1.0<br>(0.93–1.09)  |
| Tameside         | 2002        | 0.99<br>(0.91–1.08) |
| Tameside         | 2003        | 1.06<br>(0.97–1.16) |
| Tameside         | 2004        | 1.02<br>(0.94–1.12) |
| Tameside         | 2005        | 1.04<br>(0.94–1.14) |
| Tameside         | 2006        | 1.07<br>(0.97–1.17) |

**Table 15 Ratio of adjusted to unadjusted 5q0 values for scaled locations by year**

| <b>Geography</b> | <b>Year</b> | <b>Ratio</b>        |
|------------------|-------------|---------------------|
| Tameside         | 2007        | 1.05<br>(0.95–1.17) |
| Tameside         | 2008        | 1.04<br>(0.95–1.15) |
| Tameside         | 2009        | 1.02<br>(0.93–1.11) |
| Tameside         | 2010        | 0.99<br>(0.91–1.08) |
| Tameside         | 2011        | 1.0<br>(0.91–1.1)   |
| Tameside         | 2012        | 0.97<br>(0.88–1.06) |
| Tameside         | 2013        | 0.94<br>(0.86–1.02) |
| Tameside         | 2014        | 0.96<br>(0.86–1.06) |
| Tameside         | 2015        | 0.99<br>(0.88–1.1)  |
| Tameside         | 2016        | 1.04<br>(0.95–1.15) |
| Tameside         | 2017        | 1.06<br>(0.9–1.23)  |
| Trafford         | 1950        | 0.57<br>(0.47–0.68) |
| Trafford         | 1951        | 0.67<br>(0.55–0.8)  |
| Trafford         | 1952        | 0.63<br>(0.52–0.75) |
| Trafford         | 1953        | 0.64<br>(0.52–0.76) |
| Trafford         | 1954        | 0.6<br>(0.5–0.71)   |
| Trafford         | 1955        | 0.61<br>(0.51–0.71) |
| Trafford         | 1956        | 0.6<br>(0.5–0.7)    |
| Trafford         | 1957        | 0.61<br>(0.52–0.72) |
| Trafford         | 1958        | 0.61<br>(0.51–0.71) |
| Trafford         | 1959        | 0.61<br>(0.51–0.72) |
| Trafford         | 1960        | 0.63<br>(0.53–0.74) |
| Trafford         | 1961        | 0.64<br>(0.54–0.77) |
| Trafford         | 1962        | 0.67<br>(0.56–0.8)  |
| Trafford         | 1963        | 0.68<br>(0.56–0.81) |
| Trafford         | 1964        | 0.67<br>(0.55–0.8)  |
| Trafford         | 1965        | 0.66<br>(0.54–0.79) |
| Trafford         | 1966        | 0.68<br>(0.56–0.82) |
| Trafford         | 1967        | 0.68<br>(0.55–0.81) |
| Trafford         | 1968        | 0.72<br>(0.59–0.86) |
| Trafford         | 1969        | 0.74<br>(0.6–0.88)  |

**Table 15 Ratio of adjusted to unadjusted 5q0 values for scaled locations by year**

| <b>Geography</b> | <b>Year</b> | <b>Ratio</b>        |
|------------------|-------------|---------------------|
| Trafford         | 1970        | 0.77<br>(0.63–0.92) |
| Trafford         | 1971        | 0.8<br>(0.67–0.95)  |
| Trafford         | 1972        | 0.81<br>(0.68–0.96) |
| Trafford         | 1973        | 0.83<br>(0.7–0.96)  |
| Trafford         | 1974        | 0.85<br>(0.73–0.98) |
| Trafford         | 1975        | 0.86<br>(0.74–0.99) |
| Trafford         | 1976        | 0.84<br>(0.72–0.97) |
| Trafford         | 1977        | 0.87<br>(0.76–0.99) |
| Trafford         | 1978        | 0.92<br>(0.82–1.04) |
| Trafford         | 1979        | 0.95<br>(0.86–1.06) |
| Trafford         | 1980        | 0.95<br>(0.86–1.03) |
| Trafford         | 1981        | 0.91<br>(0.84–0.98) |
| Trafford         | 1982        | 0.97<br>(0.9–1.04)  |
| Trafford         | 1983        | 0.95<br>(0.89–1.02) |
| Trafford         | 1984        | 0.92<br>(0.86–0.98) |
| Trafford         | 1985        | 0.97<br>(0.9–1.03)  |
| Trafford         | 1986        | 1.01<br>(0.96–1.08) |
| Trafford         | 1987        | 1.02<br>(0.94–1.1)  |
| Trafford         | 1988        | 1.04<br>(0.98–1.11) |
| Trafford         | 1989        | 1.02<br>(0.95–1.08) |
| Trafford         | 1990        | 1.02<br>(0.94–1.1)  |
| Trafford         | 1991        | 1.0<br>(0.93–1.06)  |
| Trafford         | 1992        | 0.92<br>(0.85–0.98) |
| Trafford         | 1993        | 0.91<br>(0.85–0.98) |
| Trafford         | 1994        | 0.92<br>(0.84–1.0)  |
| Trafford         | 1995        | 0.95<br>(0.87–1.04) |
| Trafford         | 1996        | 0.99<br>(0.91–1.08) |
| Trafford         | 1997        | 1.01<br>(0.93–1.1)  |
| Trafford         | 1998        | 0.99<br>(0.91–1.08) |
| Trafford         | 1999        | 1.04<br>(0.95–1.14) |
| Trafford         | 2000        | 1.01<br>(0.92–1.12) |

**Table 15 Ratio of adjusted to unadjusted 5q0 values for scaled locations by year**

| <b>Geography</b> | <b>Year</b> | <b>Ratio</b>        |
|------------------|-------------|---------------------|
| Trafford         | 2001        | 1.0<br>(0.93–1.09)  |
| Trafford         | 2002        | 0.99<br>(0.91–1.08) |
| Trafford         | 2003        | 1.06<br>(0.97–1.16) |
| Trafford         | 2004        | 1.02<br>(0.94–1.12) |
| Trafford         | 2005        | 1.04<br>(0.94–1.14) |
| Trafford         | 2006        | 1.07<br>(0.97–1.17) |
| Trafford         | 2007        | 1.05<br>(0.95–1.17) |
| Trafford         | 2008        | 1.04<br>(0.95–1.15) |
| Trafford         | 2009        | 1.02<br>(0.93–1.11) |
| Trafford         | 2010        | 0.99<br>(0.91–1.08) |
| Trafford         | 2011        | 1.0<br>(0.91–1.1)   |
| Trafford         | 2012        | 0.97<br>(0.88–1.06) |
| Trafford         | 2013        | 0.94<br>(0.86–1.02) |
| Trafford         | 2014        | 0.96<br>(0.86–1.06) |
| Trafford         | 2015        | 0.99<br>(0.88–1.1)  |
| Trafford         | 2016        | 1.04<br>(0.95–1.15) |
| Trafford         | 2017        | 1.06<br>(0.9–1.23)  |
| Warrington       | 1950        | 0.57<br>(0.47–0.68) |
| Warrington       | 1951        | 0.67<br>(0.55–0.8)  |
| Warrington       | 1952        | 0.63<br>(0.52–0.75) |
| Warrington       | 1953        | 0.63<br>(0.52–0.76) |
| Warrington       | 1954        | 0.6<br>(0.5–0.71)   |
| Warrington       | 1955        | 0.6<br>(0.51–0.71)  |
| Warrington       | 1956        | 0.6<br>(0.5–0.7)    |
| Warrington       | 1957        | 0.61<br>(0.52–0.72) |
| Warrington       | 1958        | 0.61<br>(0.51–0.71) |
| Warrington       | 1959        | 0.61<br>(0.51–0.72) |
| Warrington       | 1960        | 0.63<br>(0.52–0.74) |
| Warrington       | 1961        | 0.64<br>(0.54–0.77) |
| Warrington       | 1962        | 0.67<br>(0.55–0.8)  |
| Warrington       | 1963        | 0.68<br>(0.56–0.81) |

**Table 15 Ratio of adjusted to unadjusted 5q0 values for scaled locations by year**

| <b>Geography</b> | <b>Year</b> | <b>Ratio</b>        |
|------------------|-------------|---------------------|
| Warrington       | 1964        | 0.67<br>(0.55–0.8)  |
| Warrington       | 1965        | 0.66<br>(0.54–0.79) |
| Warrington       | 1966        | 0.68<br>(0.56–0.82) |
| Warrington       | 1967        | 0.68<br>(0.55–0.81) |
| Warrington       | 1968        | 0.72<br>(0.58–0.86) |
| Warrington       | 1969        | 0.73<br>(0.6–0.88)  |
| Warrington       | 1970        | 0.77<br>(0.63–0.92) |
| Warrington       | 1971        | 0.8<br>(0.67–0.95)  |
| Warrington       | 1972        | 0.81<br>(0.68–0.96) |
| Warrington       | 1973        | 0.83<br>(0.7–0.96)  |
| Warrington       | 1974        | 0.85<br>(0.73–0.98) |
| Warrington       | 1975        | 0.86<br>(0.74–0.99) |
| Warrington       | 1976        | 0.84<br>(0.72–0.97) |
| Warrington       | 1977        | 0.87<br>(0.75–0.99) |
| Warrington       | 1978        | 0.92<br>(0.82–1.04) |
| Warrington       | 1979        | 0.95<br>(0.85–1.06) |
| Warrington       | 1980        | 0.95<br>(0.86–1.03) |
| Warrington       | 1981        | 0.91<br>(0.84–0.98) |
| Warrington       | 1982        | 0.97<br>(0.9–1.04)  |
| Warrington       | 1983        | 0.95<br>(0.89–1.02) |
| Warrington       | 1984        | 0.92<br>(0.86–0.98) |
| Warrington       | 1985        | 0.97<br>(0.9–1.03)  |
| Warrington       | 1986        | 1.01<br>(0.96–1.08) |
| Warrington       | 1987        | 1.02<br>(0.94–1.1)  |
| Warrington       | 1988        | 1.04<br>(0.98–1.11) |
| Warrington       | 1989        | 1.02<br>(0.95–1.08) |
| Warrington       | 1990        | 1.02<br>(0.94–1.1)  |
| Warrington       | 1991        | 1.0<br>(0.93–1.06)  |
| Warrington       | 1992        | 0.92<br>(0.85–0.98) |
| Warrington       | 1993        | 0.91<br>(0.85–0.98) |
| Warrington       | 1994        | 0.92<br>(0.84–1.0)  |

**Table 15 Ratio of adjusted to unadjusted 5q0 values for scaled locations by year**

| <b>Geography</b> | <b>Year</b> | <b>Ratio</b>        |
|------------------|-------------|---------------------|
| Warrington       | 1995        | 0.95<br>(0.87–1.04) |
| Warrington       | 1996        | 0.99<br>(0.91–1.08) |
| Warrington       | 1997        | 1.01<br>(0.93–1.1)  |
| Warrington       | 1998        | 0.99<br>(0.91–1.08) |
| Warrington       | 1999        | 1.04<br>(0.95–1.14) |
| Warrington       | 2000        | 1.01<br>(0.92–1.12) |
| Warrington       | 2001        | 1.0<br>(0.93–1.09)  |
| Warrington       | 2002        | 0.99<br>(0.91–1.08) |
| Warrington       | 2003        | 1.06<br>(0.97–1.16) |
| Warrington       | 2004        | 1.02<br>(0.94–1.12) |
| Warrington       | 2005        | 1.04<br>(0.94–1.14) |
| Warrington       | 2006        | 1.07<br>(0.97–1.17) |
| Warrington       | 2007        | 1.05<br>(0.95–1.17) |
| Warrington       | 2008        | 1.04<br>(0.95–1.15) |
| Warrington       | 2009        | 1.02<br>(0.93–1.11) |
| Warrington       | 2010        | 0.99<br>(0.91–1.08) |
| Warrington       | 2011        | 1.0<br>(0.91–1.1)   |
| Warrington       | 2012        | 0.97<br>(0.88–1.06) |
| Warrington       | 2013        | 0.94<br>(0.86–1.02) |
| Warrington       | 2014        | 0.96<br>(0.86–1.06) |
| Warrington       | 2015        | 0.99<br>(0.88–1.1)  |
| Warrington       | 2016        | 1.04<br>(0.95–1.15) |
| Warrington       | 2017        | 1.06<br>(0.9–1.23)  |
| Wigan            | 1950        | 0.57<br>(0.47–0.68) |
| Wigan            | 1951        | 0.67<br>(0.55–0.8)  |
| Wigan            | 1952        | 0.63<br>(0.52–0.75) |
| Wigan            | 1953        | 0.64<br>(0.52–0.76) |
| Wigan            | 1954        | 0.6<br>(0.5–0.71)   |
| Wigan            | 1955        | 0.6<br>(0.51–0.71)  |
| Wigan            | 1956        | 0.6<br>(0.5–0.7)    |
| Wigan            | 1957        | 0.61<br>(0.52–0.72) |

**Table 15 Ratio of adjusted to unadjusted 5q0 values for scaled locations by year**

| <b>Geography</b> | <b>Year</b> | <b>Ratio</b>        |
|------------------|-------------|---------------------|
| Wigan            | 1958        | 0.61<br>(0.51–0.71) |
| Wigan            | 1959        | 0.61<br>(0.51–0.72) |
| Wigan            | 1960        | 0.63<br>(0.52–0.74) |
| Wigan            | 1961        | 0.64<br>(0.54–0.77) |
| Wigan            | 1962        | 0.67<br>(0.55–0.8)  |
| Wigan            | 1963        | 0.68<br>(0.56–0.81) |
| Wigan            | 1964        | 0.67<br>(0.55–0.8)  |
| Wigan            | 1965        | 0.66<br>(0.54–0.79) |
| Wigan            | 1966        | 0.68<br>(0.56–0.82) |
| Wigan            | 1967        | 0.68<br>(0.55–0.81) |
| Wigan            | 1968        | 0.72<br>(0.58–0.86) |
| Wigan            | 1969        | 0.73<br>(0.6–0.88)  |
| Wigan            | 1970        | 0.77<br>(0.63–0.92) |
| Wigan            | 1971        | 0.8<br>(0.67–0.95)  |
| Wigan            | 1972        | 0.81<br>(0.68–0.96) |
| Wigan            | 1973        | 0.83<br>(0.7–0.96)  |
| Wigan            | 1974        | 0.85<br>(0.73–0.98) |
| Wigan            | 1975        | 0.86<br>(0.74–0.99) |
| Wigan            | 1976        | 0.84<br>(0.72–0.97) |
| Wigan            | 1977        | 0.87<br>(0.75–0.99) |
| Wigan            | 1978        | 0.92<br>(0.82–1.04) |
| Wigan            | 1979        | 0.95<br>(0.85–1.06) |
| Wigan            | 1980        | 0.95<br>(0.86–1.03) |
| Wigan            | 1981        | 0.91<br>(0.84–0.98) |
| Wigan            | 1982        | 0.97<br>(0.9–1.04)  |
| Wigan            | 1983        | 0.95<br>(0.89–1.02) |
| Wigan            | 1984        | 0.92<br>(0.86–0.98) |
| Wigan            | 1985        | 0.97<br>(0.9–1.03)  |
| Wigan            | 1986        | 1.01<br>(0.96–1.08) |
| Wigan            | 1987        | 1.02<br>(0.94–1.1)  |
| Wigan            | 1988        | 1.04<br>(0.98–1.11) |

**Table 15 Ratio of adjusted to unadjusted 5q0 values for scaled locations by year**

| <b>Geography</b> | <b>Year</b> | <b>Ratio</b>        |
|------------------|-------------|---------------------|
| Wigan            | 1989        | 1.02<br>(0.95–1.08) |
| Wigan            | 1990        | 1.02<br>(0.94–1.1)  |
| Wigan            | 1991        | 1.0<br>(0.93–1.06)  |
| Wigan            | 1992        | 0.92<br>(0.85–0.98) |
| Wigan            | 1993        | 0.91<br>(0.85–0.98) |
| Wigan            | 1994        | 0.92<br>(0.84–1.0)  |
| Wigan            | 1995        | 0.95<br>(0.87–1.04) |
| Wigan            | 1996        | 0.99<br>(0.91–1.08) |
| Wigan            | 1997        | 1.01<br>(0.93–1.1)  |
| Wigan            | 1998        | 0.99<br>(0.91–1.08) |
| Wigan            | 1999        | 1.04<br>(0.95–1.14) |
| Wigan            | 2000        | 1.01<br>(0.92–1.12) |
| Wigan            | 2001        | 1.0<br>(0.93–1.09)  |
| Wigan            | 2002        | 0.99<br>(0.91–1.08) |
| Wigan            | 2003        | 1.06<br>(0.97–1.16) |
| Wigan            | 2004        | 1.02<br>(0.94–1.12) |
| Wigan            | 2005        | 1.04<br>(0.94–1.14) |
| Wigan            | 2006        | 1.07<br>(0.97–1.17) |
| Wigan            | 2007        | 1.05<br>(0.95–1.17) |
| Wigan            | 2008        | 1.04<br>(0.95–1.15) |
| Wigan            | 2009        | 1.02<br>(0.93–1.11) |
| Wigan            | 2010        | 0.99<br>(0.91–1.08) |
| Wigan            | 2011        | 1.0<br>(0.91–1.1)   |
| Wigan            | 2012        | 0.97<br>(0.88–1.06) |
| Wigan            | 2013        | 0.94<br>(0.86–1.02) |
| Wigan            | 2014        | 0.96<br>(0.86–1.06) |
| Wigan            | 2015        | 0.99<br>(0.88–1.1)  |
| Wigan            | 2016        | 1.04<br>(0.95–1.15) |
| Wigan            | 2017        | 1.06<br>(0.9–1.23)  |
| Wirral           | 1950        | 0.57<br>(0.47–0.68) |
| Wirral           | 1951        | 0.67<br>(0.55–0.8)  |



**Table 15 Ratio of adjusted to unadjusted 5q0 values for scaled locations by year**

| <b>Geography</b> | <b>Year</b> | <b>Ratio</b>        |
|------------------|-------------|---------------------|
| Wirral           | 1952        | 0.63<br>(0.52–0.75) |
| Wirral           | 1953        | 0.64<br>(0.52–0.76) |
| Wirral           | 1954        | 0.6<br>(0.5–0.71)   |
| Wirral           | 1955        | 0.6<br>(0.51–0.71)  |
| Wirral           | 1956        | 0.6<br>(0.5–0.7)    |
| Wirral           | 1957        | 0.61<br>(0.52–0.72) |
| Wirral           | 1958        | 0.61<br>(0.51–0.71) |
| Wirral           | 1959        | 0.61<br>(0.51–0.72) |
| Wirral           | 1960        | 0.63<br>(0.53–0.74) |
| Wirral           | 1961        | 0.64<br>(0.54–0.77) |
| Wirral           | 1962        | 0.67<br>(0.55–0.8)  |
| Wirral           | 1963        | 0.68<br>(0.56–0.81) |
| Wirral           | 1964        | 0.67<br>(0.55–0.8)  |
| Wirral           | 1965        | 0.66<br>(0.54–0.79) |
| Wirral           | 1966        | 0.68<br>(0.56–0.82) |
| Wirral           | 1967        | 0.68<br>(0.55–0.81) |
| Wirral           | 1968        | 0.72<br>(0.58–0.86) |
| Wirral           | 1969        | 0.73<br>(0.6–0.88)  |
| Wirral           | 1970        | 0.77<br>(0.63–0.92) |
| Wirral           | 1971        | 0.8<br>(0.67–0.95)  |
| Wirral           | 1972        | 0.81<br>(0.68–0.96) |
| Wirral           | 1973        | 0.83<br>(0.7–0.96)  |
| Wirral           | 1974        | 0.85<br>(0.73–0.98) |
| Wirral           | 1975        | 0.86<br>(0.74–0.99) |
| Wirral           | 1976        | 0.84<br>(0.72–0.97) |
| Wirral           | 1977        | 0.87<br>(0.76–0.99) |
| Wirral           | 1978        | 0.92<br>(0.82–1.04) |
| Wirral           | 1979        | 0.95<br>(0.85–1.06) |
| Wirral           | 1980        | 0.95<br>(0.86–1.03) |
| Wirral           | 1981        | 0.91<br>(0.84–0.98) |
| Wirral           | 1982        | 0.97<br>(0.9–1.04)  |

**Table 15 Ratio of adjusted to unadjusted 5q0 values for scaled locations by year**

| <b>Geography</b> | <b>Year</b> | <b>Ratio</b>        |
|------------------|-------------|---------------------|
| Wirral           | 1983        | 0.95<br>(0.89–1.02) |
| Wirral           | 1984        | 0.92<br>(0.86–0.98) |
| Wirral           | 1985        | 0.97<br>(0.9–1.03)  |
| Wirral           | 1986        | 1.01<br>(0.96–1.08) |
| Wirral           | 1987        | 1.02<br>(0.94–1.1)  |
| Wirral           | 1988        | 1.04<br>(0.98–1.11) |
| Wirral           | 1989        | 1.02<br>(0.95–1.08) |
| Wirral           | 1990        | 1.02<br>(0.94–1.1)  |
| Wirral           | 1991        | 1.0<br>(0.93–1.06)  |
| Wirral           | 1992        | 0.92<br>(0.85–0.98) |
| Wirral           | 1993        | 0.91<br>(0.85–0.98) |
| Wirral           | 1994        | 0.92<br>(0.84–1.0)  |
| Wirral           | 1995        | 0.95<br>(0.87–1.04) |
| Wirral           | 1996        | 0.99<br>(0.91–1.08) |
| Wirral           | 1997        | 1.01<br>(0.93–1.1)  |
| Wirral           | 1998        | 0.99<br>(0.91–1.08) |
| Wirral           | 1999        | 1.04<br>(0.95–1.14) |
| Wirral           | 2000        | 1.01<br>(0.92–1.12) |
| Wirral           | 2001        | 1.0<br>(0.93–1.09)  |
| Wirral           | 2002        | 0.99<br>(0.91–1.08) |
| Wirral           | 2003        | 1.06<br>(0.97–1.16) |
| Wirral           | 2004        | 1.02<br>(0.94–1.12) |
| Wirral           | 2005        | 1.04<br>(0.94–1.14) |
| Wirral           | 2006        | 1.07<br>(0.97–1.17) |
| Wirral           | 2007        | 1.05<br>(0.95–1.17) |
| Wirral           | 2008        | 1.04<br>(0.95–1.15) |
| Wirral           | 2009        | 1.02<br>(0.93–1.11) |
| Wirral           | 2010        | 0.99<br>(0.91–1.08) |
| Wirral           | 2011        | 1.0<br>(0.91–1.1)   |
| Wirral           | 2012        | 0.97<br>(0.88–1.06) |
| Wirral           | 2013        | 0.94<br>(0.86–1.02) |

**Table 15 Ratio of adjusted to unadjusted 5q0 values for scaled locations by year**

| <b>Geography</b>   | <b>Year</b> | <b>Ratio</b>        |
|--------------------|-------------|---------------------|
| Wirral             | 2014        | 0.96<br>(0.86–1.06) |
| Wirral             | 2015        | 0.99<br>(0.88–1.1)  |
| Wirral             | 2016        | 1.04<br>(0.95–1.15) |
| Wirral             | 2017        | 1.06<br>(0.9–1.23)  |
| South East England | 1950        | 0.9<br>(0.74–1.08)  |
| South East England | 1951        | 1.04<br>(0.85–1.25) |
| South East England | 1952        | 0.97<br>(0.8–1.17)  |
| South East England | 1953        | 0.98<br>(0.8–1.17)  |
| South East England | 1954        | 0.91<br>(0.75–1.1)  |
| South East England | 1955        | 0.91<br>(0.74–1.11) |
| South East England | 1956        | 0.89<br>(0.73–1.09) |
| South East England | 1957        | 0.9<br>(0.73–1.1)   |
| South East England | 1958        | 0.88<br>(0.71–1.07) |
| South East England | 1959        | 0.87<br>(0.71–1.06) |
| South East England | 1960        | 0.88<br>(0.71–1.06) |
| South East England | 1961        | 0.89<br>(0.72–1.07) |
| South East England | 1962        | 0.91<br>(0.74–1.09) |
| South East England | 1963        | 0.91<br>(0.74–1.09) |
| South East England | 1964        | 0.88<br>(0.72–1.05) |
| South East England | 1965        | 0.85<br>(0.69–1.02) |
| South East England | 1966        | 0.87<br>(0.71–1.04) |
| South East England | 1967        | 0.85<br>(0.69–1.02) |
| South East England | 1968        | 0.88<br>(0.72–1.05) |
| South East England | 1969        | 0.89<br>(0.73–1.06) |
| South East England | 1970        | 0.91<br>(0.76–1.08) |
| South East England | 1971        | 0.93<br>(0.78–1.1)  |
| South East England | 1972        | 0.93<br>(0.78–1.11) |
| South East England | 1973        | 0.93<br>(0.78–1.12) |
| South East England | 1974        | 0.94<br>(0.79–1.11) |
| South East England | 1975        | 0.93<br>(0.79–1.1)  |
| South East England | 1976        | 0.9<br>(0.77–1.04)  |

**Table 15 Ratio of adjusted to unadjusted 5q0 values for scaled locations by year**

| <b>Geography</b>   | <b>Year</b> | <b>Ratio</b>        |
|--------------------|-------------|---------------------|
| South East England | 1977        | 0.92<br>(0.8–1.04)  |
| South East England | 1978        | 0.96<br>(0.85–1.08) |
| South East England | 1979        | 0.98<br>(0.9–1.08)  |
| South East England | 1980        | 0.97<br>(0.9–1.04)  |
| South East England | 1981        | 0.93<br>(0.89–0.97) |
| South East England | 1982        | 0.98<br>(0.95–1.01) |
| South East England | 1983        | 1.0<br>(0.97–1.03)  |
| South East England | 1984        | 0.98<br>(0.95–1.01) |
| South East England | 1985        | 0.99<br>(0.95–1.02) |
| South East England | 1986        | 0.99<br>(0.97–1.02) |
| South East England | 1987        | 0.99<br>(0.96–1.01) |
| South East England | 1988        | 1.0<br>(0.97–1.03)  |
| South East England | 1989        | 0.99<br>(0.97–1.01) |
| South East England | 1990        | 1.0<br>(0.98–1.02)  |
| South East England | 1991        | 1.0<br>(0.98–1.02)  |
| South East England | 1992        | 0.97<br>(0.95–1.0)  |
| South East England | 1993        | 1.0<br>(0.97–1.02)  |
| South East England | 1994        | 1.01<br>(0.98–1.04) |
| South East England | 1995        | 1.02<br>(0.99–1.05) |
| South East England | 1996        | 1.04<br>(1.01–1.06) |
| South East England | 1997        | 1.01<br>(0.97–1.05) |
| South East England | 1998        | 1.0<br>(0.96–1.03)  |
| South East England | 1999        | 1.02<br>(0.99–1.06) |
| South East England | 2000        | 1.01<br>(0.95–1.09) |
| South East England | 2001        | 1.0<br>(0.96–1.04)  |
| South East England | 2002        | 0.98<br>(0.95–1.02) |
| South East England | 2003        | 1.02<br>(0.98–1.06) |
| South East England | 2004        | 0.99<br>(0.96–1.02) |
| South East England | 2005        | 0.99<br>(0.95–1.03) |
| South East England | 2006        | 1.01<br>(0.97–1.05) |
| South East England | 2007        | 1.01<br>(0.98–1.05) |

**Table 15 Ratio of adjusted to unadjusted 5q0 values for scaled locations by year**

| <b>Geography</b>   | <b>Year</b> | <b>Ratio</b>        |
|--------------------|-------------|---------------------|
| South East England | 2008        | 1.01<br>(0.98–1.04) |
| South East England | 2009        | 1.0<br>(0.96–1.04)  |
| South East England | 2010        | 0.98<br>(0.95–1.02) |
| South East England | 2011        | 1.0<br>(0.96–1.04)  |
| South East England | 2012        | 1.0<br>(0.96–1.04)  |
| South East England | 2013        | 0.99<br>(0.95–1.02) |
| South East England | 2014        | 0.99<br>(0.95–1.03) |
| South East England | 2015        | 1.0<br>(0.96–1.04)  |
| South East England | 2016        | 1.0<br>(0.94–1.05)  |
| South East England | 2017        | 1.02<br>(0.92–1.14) |
| Bracknell Forest   | 1950        | 0.63<br>(0.52–0.75) |
| Bracknell Forest   | 1951        | 0.73<br>(0.6–0.88)  |
| Bracknell Forest   | 1952        | 0.69<br>(0.56–0.82) |
| Bracknell Forest   | 1953        | 0.69<br>(0.57–0.83) |
| Bracknell Forest   | 1954        | 0.65<br>(0.54–0.78) |
| Bracknell Forest   | 1955        | 0.66<br>(0.55–0.78) |
| Bracknell Forest   | 1956        | 0.65<br>(0.54–0.77) |
| Bracknell Forest   | 1957        | 0.66<br>(0.55–0.78) |
| Bracknell Forest   | 1958        | 0.65<br>(0.55–0.77) |
| Bracknell Forest   | 1959        | 0.66<br>(0.55–0.77) |
| Bracknell Forest   | 1960        | 0.67<br>(0.57–0.8)  |
| Bracknell Forest   | 1961        | 0.69<br>(0.58–0.82) |
| Bracknell Forest   | 1962        | 0.71<br>(0.59–0.85) |
| Bracknell Forest   | 1963        | 0.72<br>(0.59–0.87) |
| Bracknell Forest   | 1964        | 0.7<br>(0.58–0.84)  |
| Bracknell Forest   | 1965        | 0.69<br>(0.56–0.83) |
| Bracknell Forest   | 1966        | 0.72<br>(0.58–0.86) |
| Bracknell Forest   | 1967        | 0.71<br>(0.58–0.85) |
| Bracknell Forest   | 1968        | 0.74<br>(0.61–0.89) |
| Bracknell Forest   | 1969        | 0.76<br>(0.62–0.92) |
| Bracknell Forest   | 1970        | 0.79<br>(0.65–0.94) |

**Table 15 Ratio of adjusted to unadjusted 5q0 values for scaled locations by year**

| <b>Geography</b> | <b>Year</b> | <b>Ratio</b>        |
|------------------|-------------|---------------------|
| Bracknell Forest | 1971        | 0.82<br>(0.69–0.97) |
| Bracknell Forest | 1972        | 0.83<br>(0.7–0.97)  |
| Bracknell Forest | 1973        | 0.84<br>(0.72–0.97) |
| Bracknell Forest | 1974        | 0.86<br>(0.74–0.98) |
| Bracknell Forest | 1975        | 0.87<br>(0.75–0.99) |
| Bracknell Forest | 1976        | 0.84<br>(0.74–0.95) |
| Bracknell Forest | 1977        | 0.87<br>(0.77–0.98) |
| Bracknell Forest | 1978        | 0.92<br>(0.83–1.02) |
| Bracknell Forest | 1979        | 0.95<br>(0.86–1.05) |
| Bracknell Forest | 1980        | 0.94<br>(0.87–1.02) |
| Bracknell Forest | 1981        | 0.9<br>(0.84–0.97)  |
| Bracknell Forest | 1982        | 0.94<br>(0.88–1.01) |
| Bracknell Forest | 1983        | 0.95<br>(0.89–1.01) |
| Bracknell Forest | 1984        | 0.94<br>(0.88–0.99) |
| Bracknell Forest | 1985        | 0.98<br>(0.92–1.04) |
| Bracknell Forest | 1986        | 1.01<br>(0.94–1.07) |
| Bracknell Forest | 1987        | 1.06<br>(1.01–1.11) |
| Bracknell Forest | 1988        | 1.09<br>(1.02–1.15) |
| Bracknell Forest | 1989        | 1.06<br>(1.0–1.12)  |
| Bracknell Forest | 1990        | 1.04<br>(0.98–1.1)  |
| Bracknell Forest | 1991        | 0.99<br>(0.93–1.05) |
| Bracknell Forest | 1992        | 0.91<br>(0.83–0.97) |
| Bracknell Forest | 1993        | 0.91<br>(0.85–0.97) |
| Bracknell Forest | 1994        | 0.9<br>(0.83–0.98)  |
| Bracknell Forest | 1995        | 0.96<br>(0.89–1.03) |
| Bracknell Forest | 1996        | 1.02<br>(0.95–1.09) |
| Bracknell Forest | 1997        | 0.99<br>(0.92–1.05) |
| Bracknell Forest | 1998        | 0.97<br>(0.9–1.04)  |
| Bracknell Forest | 1999        | 1.0<br>(0.93–1.08)  |
| Bracknell Forest | 2000        | 0.98<br>(0.89–1.09) |
| Bracknell Forest | 2001        | 0.98<br>(0.91–1.06) |

**Table 15 Ratio of adjusted to unadjusted 5q0 values for scaled locations by year**

| <b>Geography</b>  | <b>Year</b> | <b>Ratio</b>        |
|-------------------|-------------|---------------------|
| Bracknell Forest  | 2002        | 1.0<br>(0.93–1.08)  |
| Bracknell Forest  | 2003        | 1.05<br>(0.96–1.15) |
| Bracknell Forest  | 2004        | 1.0<br>(0.91–1.1)   |
| Bracknell Forest  | 2005        | 1.01<br>(0.92–1.11) |
| Bracknell Forest  | 2006        | 1.07<br>(0.97–1.16) |
| Bracknell Forest  | 2007        | 1.07<br>(0.98–1.16) |
| Bracknell Forest  | 2008        | 1.07<br>(0.98–1.17) |
| Bracknell Forest  | 2009        | 1.03<br>(0.95–1.13) |
| Bracknell Forest  | 2010        | 0.99<br>(0.92–1.07) |
| Bracknell Forest  | 2011        | 0.99<br>(0.91–1.07) |
| Bracknell Forest  | 2012        | 0.98<br>(0.91–1.06) |
| Bracknell Forest  | 2013        | 0.97<br>(0.89–1.04) |
| Bracknell Forest  | 2014        | 0.96<br>(0.88–1.05) |
| Bracknell Forest  | 2015        | 0.97<br>(0.89–1.07) |
| Bracknell Forest  | 2016        | 1.0<br>(0.91–1.08)  |
| Bracknell Forest  | 2017        | 1.02<br>(0.88–1.17) |
| Brighton and Hove | 1950        | 0.63<br>(0.52–0.75) |
| Brighton and Hove | 1951        | 0.73<br>(0.6–0.89)  |
| Brighton and Hove | 1952        | 0.69<br>(0.56–0.82) |
| Brighton and Hove | 1953        | 0.69<br>(0.57–0.83) |
| Brighton and Hove | 1954        | 0.66<br>(0.54–0.78) |
| Brighton and Hove | 1955        | 0.66<br>(0.55–0.78) |
| Brighton and Hove | 1956        | 0.65<br>(0.54–0.77) |
| Brighton and Hove | 1957        | 0.66<br>(0.56–0.78) |
| Brighton and Hove | 1958        | 0.65<br>(0.55–0.77) |
| Brighton and Hove | 1959        | 0.66<br>(0.55–0.77) |
| Brighton and Hove | 1960        | 0.67<br>(0.57–0.8)  |
| Brighton and Hove | 1961        | 0.69<br>(0.58–0.82) |
| Brighton and Hove | 1962        | 0.71<br>(0.59–0.85) |
| Brighton and Hove | 1963        | 0.72<br>(0.6–0.87)  |
| Brighton and Hove | 1964        | 0.7<br>(0.58–0.84)  |

**Table 15 Ratio of adjusted to unadjusted 5q0 values for scaled locations by year**

| <b>Geography</b>  | <b>Year</b> | <b>Ratio</b>        |
|-------------------|-------------|---------------------|
| Brighton and Hove | 1965        | 0.69<br>(0.56–0.83) |
| Brighton and Hove | 1966        | 0.72<br>(0.59–0.86) |
| Brighton and Hove | 1967        | 0.71<br>(0.58–0.85) |
| Brighton and Hove | 1968        | 0.74<br>(0.61–0.89) |
| Brighton and Hove | 1969        | 0.76<br>(0.63–0.92) |
| Brighton and Hove | 1970        | 0.8<br>(0.66–0.94)  |
| Brighton and Hove | 1971        | 0.82<br>(0.69–0.97) |
| Brighton and Hove | 1972        | 0.83<br>(0.7–0.97)  |
| Brighton and Hove | 1973        | 0.84<br>(0.72–0.97) |
| Brighton and Hove | 1974        | 0.86<br>(0.74–0.98) |
| Brighton and Hove | 1975        | 0.87<br>(0.75–0.99) |
| Brighton and Hove | 1976        | 0.84<br>(0.74–0.95) |
| Brighton and Hove | 1977        | 0.87<br>(0.77–0.98) |
| Brighton and Hove | 1978        | 0.92<br>(0.83–1.02) |
| Brighton and Hove | 1979        | 0.95<br>(0.86–1.05) |
| Brighton and Hove | 1980        | 0.94<br>(0.87–1.02) |
| Brighton and Hove | 1981        | 0.9<br>(0.84–0.97)  |
| Brighton and Hove | 1982        | 0.94<br>(0.88–1.01) |
| Brighton and Hove | 1983        | 0.95<br>(0.89–1.01) |
| Brighton and Hove | 1984        | 0.94<br>(0.88–0.99) |
| Brighton and Hove | 1985        | 0.98<br>(0.92–1.04) |
| Brighton and Hove | 1986        | 1.01<br>(0.94–1.06) |
| Brighton and Hove | 1987        | 1.06<br>(1.01–1.11) |
| Brighton and Hove | 1988        | 1.09<br>(1.02–1.15) |
| Brighton and Hove | 1989        | 1.06<br>(1.0–1.12)  |
| Brighton and Hove | 1990        | 1.04<br>(0.98–1.1)  |
| Brighton and Hove | 1991        | 0.99<br>(0.93–1.05) |
| Brighton and Hove | 1992        | 0.91<br>(0.83–0.97) |
| Brighton and Hove | 1993        | 0.91<br>(0.85–0.97) |
| Brighton and Hove | 1994        | 0.9<br>(0.83–0.98)  |
| Brighton and Hove | 1995        | 0.96<br>(0.89–1.03) |



**Table 15 Ratio of adjusted to unadjusted 5q0 values for scaled locations by year**

| <b>Geography</b>  | <b>Year</b> | <b>Ratio</b>        |
|-------------------|-------------|---------------------|
| Brighton and Hove | 1996        | 1.02<br>(0.95–1.09) |
| Brighton and Hove | 1997        | 0.99<br>(0.92–1.05) |
| Brighton and Hove | 1998        | 0.97<br>(0.9–1.04)  |
| Brighton and Hove | 1999        | 1.0<br>(0.93–1.08)  |
| Brighton and Hove | 2000        | 0.98<br>(0.89–1.09) |
| Brighton and Hove | 2001        | 0.98<br>(0.91–1.06) |
| Brighton and Hove | 2002        | 1.0<br>(0.93–1.08)  |
| Brighton and Hove | 2003        | 1.05<br>(0.96–1.15) |
| Brighton and Hove | 2004        | 1.0<br>(0.91–1.1)   |
| Brighton and Hove | 2005        | 1.01<br>(0.92–1.11) |
| Brighton and Hove | 2006        | 1.07<br>(0.97–1.16) |
| Brighton and Hove | 2007        | 1.07<br>(0.98–1.16) |
| Brighton and Hove | 2008        | 1.07<br>(0.98–1.17) |
| Brighton and Hove | 2009        | 1.03<br>(0.95–1.13) |
| Brighton and Hove | 2010        | 0.99<br>(0.92–1.07) |
| Brighton and Hove | 2011        | 0.99<br>(0.91–1.07) |
| Brighton and Hove | 2012        | 0.98<br>(0.91–1.06) |
| Brighton and Hove | 2013        | 0.97<br>(0.89–1.04) |
| Brighton and Hove | 2014        | 0.96<br>(0.88–1.05) |
| Brighton and Hove | 2015        | 0.97<br>(0.89–1.07) |
| Brighton and Hove | 2016        | 1.0<br>(0.91–1.08)  |
| Brighton and Hove | 2017        | 1.02<br>(0.88–1.17) |
| Buckinghamshire   | 1950        | 0.63<br>(0.52–0.75) |
| Buckinghamshire   | 1951        | 0.73<br>(0.6–0.88)  |
| Buckinghamshire   | 1952        | 0.69<br>(0.56–0.82) |
| Buckinghamshire   | 1953        | 0.69<br>(0.57–0.83) |
| Buckinghamshire   | 1954        | 0.65<br>(0.54–0.78) |
| Buckinghamshire   | 1955        | 0.66<br>(0.55–0.78) |
| Buckinghamshire   | 1956        | 0.65<br>(0.54–0.77) |
| Buckinghamshire   | 1957        | 0.66<br>(0.55–0.78) |
| Buckinghamshire   | 1958        | 0.65<br>(0.55–0.77) |

**Table 15 Ratio of adjusted to unadjusted 5q0 values for scaled locations by year**

| <b>Geography</b> | <b>Year</b> | <b>Ratio</b>        |
|------------------|-------------|---------------------|
| Buckinghamshire  | 1959        | 0.66<br>(0.55–0.77) |
| Buckinghamshire  | 1960        | 0.67<br>(0.57–0.79) |
| Buckinghamshire  | 1961        | 0.69<br>(0.58–0.82) |
| Buckinghamshire  | 1962        | 0.71<br>(0.59–0.85) |
| Buckinghamshire  | 1963        | 0.72<br>(0.59–0.87) |
| Buckinghamshire  | 1964        | 0.7<br>(0.58–0.84)  |
| Buckinghamshire  | 1965        | 0.69<br>(0.56–0.83) |
| Buckinghamshire  | 1966        | 0.72<br>(0.58–0.86) |
| Buckinghamshire  | 1967        | 0.71<br>(0.58–0.85) |
| Buckinghamshire  | 1968        | 0.74<br>(0.61–0.89) |
| Buckinghamshire  | 1969        | 0.76<br>(0.62–0.92) |
| Buckinghamshire  | 1970        | 0.79<br>(0.65–0.94) |
| Buckinghamshire  | 1971        | 0.82<br>(0.69–0.97) |
| Buckinghamshire  | 1972        | 0.83<br>(0.7–0.97)  |
| Buckinghamshire  | 1973        | 0.84<br>(0.72–0.97) |
| Buckinghamshire  | 1974        | 0.86<br>(0.74–0.98) |
| Buckinghamshire  | 1975        | 0.87<br>(0.75–0.99) |
| Buckinghamshire  | 1976        | 0.84<br>(0.74–0.95) |
| Buckinghamshire  | 1977        | 0.87<br>(0.77–0.98) |
| Buckinghamshire  | 1978        | 0.92<br>(0.83–1.02) |
| Buckinghamshire  | 1979        | 0.95<br>(0.86–1.05) |
| Buckinghamshire  | 1980        | 0.94<br>(0.87–1.02) |
| Buckinghamshire  | 1981        | 0.9<br>(0.84–0.97)  |
| Buckinghamshire  | 1982        | 0.94<br>(0.88–1.01) |
| Buckinghamshire  | 1983        | 0.95<br>(0.89–1.01) |
| Buckinghamshire  | 1984        | 0.94<br>(0.88–0.99) |
| Buckinghamshire  | 1985        | 0.98<br>(0.92–1.04) |
| Buckinghamshire  | 1986        | 1.01<br>(0.94–1.07) |
| Buckinghamshire  | 1987        | 1.06<br>(1.01–1.11) |
| Buckinghamshire  | 1988        | 1.09<br>(1.02–1.15) |
| Buckinghamshire  | 1989        | 1.06<br>(1.0–1.12)  |

**Table 15 Ratio of adjusted to unadjusted 5q0 values for scaled locations by year**

| <b>Geography</b> | <b>Year</b> | <b>Ratio</b>        |
|------------------|-------------|---------------------|
| Buckinghamshire  | 1990        | 1.04<br>(0.98–1.1)  |
| Buckinghamshire  | 1991        | 0.99<br>(0.93–1.05) |
| Buckinghamshire  | 1992        | 0.91<br>(0.83–0.97) |
| Buckinghamshire  | 1993        | 0.91<br>(0.85–0.97) |
| Buckinghamshire  | 1994        | 0.9<br>(0.83–0.98)  |
| Buckinghamshire  | 1995        | 0.96<br>(0.89–1.03) |
| Buckinghamshire  | 1996        | 1.02<br>(0.95–1.09) |
| Buckinghamshire  | 1997        | 0.99<br>(0.92–1.05) |
| Buckinghamshire  | 1998        | 0.97<br>(0.9–1.04)  |
| Buckinghamshire  | 1999        | 1.0<br>(0.93–1.08)  |
| Buckinghamshire  | 2000        | 0.98<br>(0.89–1.09) |
| Buckinghamshire  | 2001        | 0.98<br>(0.91–1.06) |
| Buckinghamshire  | 2002        | 1.0<br>(0.93–1.08)  |
| Buckinghamshire  | 2003        | 1.05<br>(0.96–1.15) |
| Buckinghamshire  | 2004        | 1.0<br>(0.91–1.1)   |
| Buckinghamshire  | 2005        | 1.01<br>(0.92–1.11) |
| Buckinghamshire  | 2006        | 1.07<br>(0.97–1.16) |
| Buckinghamshire  | 2007        | 1.07<br>(0.98–1.16) |
| Buckinghamshire  | 2008        | 1.07<br>(0.98–1.17) |
| Buckinghamshire  | 2009        | 1.03<br>(0.95–1.13) |
| Buckinghamshire  | 2010        | 0.99<br>(0.92–1.07) |
| Buckinghamshire  | 2011        | 0.99<br>(0.91–1.07) |
| Buckinghamshire  | 2012        | 0.98<br>(0.91–1.06) |
| Buckinghamshire  | 2013        | 0.97<br>(0.89–1.04) |
| Buckinghamshire  | 2014        | 0.96<br>(0.88–1.05) |
| Buckinghamshire  | 2015        | 0.97<br>(0.89–1.07) |
| Buckinghamshire  | 2016        | 1.0<br>(0.91–1.08)  |
| Buckinghamshire  | 2017        | 1.02<br>(0.88–1.17) |
| East Sussex      | 1950        | 0.63<br>(0.52–0.75) |
| East Sussex      | 1951        | 0.73<br>(0.6–0.89)  |
| East Sussex      | 1952        | 0.69<br>(0.56–0.82) |

**Table 15 Ratio of adjusted to unadjusted 5q0 values for scaled locations by year**

| <b>Geography</b> | <b>Year</b> | <b>Ratio</b>        |
|------------------|-------------|---------------------|
| East Sussex      | 1953        | 0.69<br>(0.57–0.83) |
| East Sussex      | 1954        | 0.65<br>(0.54–0.78) |
| East Sussex      | 1955        | 0.66<br>(0.55–0.78) |
| East Sussex      | 1956        | 0.65<br>(0.54–0.77) |
| East Sussex      | 1957        | 0.66<br>(0.55–0.78) |
| East Sussex      | 1958        | 0.65<br>(0.55–0.77) |
| East Sussex      | 1959        | 0.66<br>(0.55–0.77) |
| East Sussex      | 1960        | 0.67<br>(0.57–0.8)  |
| East Sussex      | 1961        | 0.69<br>(0.58–0.82) |
| East Sussex      | 1962        | 0.71<br>(0.59–0.85) |
| East Sussex      | 1963        | 0.72<br>(0.59–0.87) |
| East Sussex      | 1964        | 0.7<br>(0.58–0.84)  |
| East Sussex      | 1965        | 0.69<br>(0.56–0.83) |
| East Sussex      | 1966        | 0.72<br>(0.58–0.86) |
| East Sussex      | 1967        | 0.71<br>(0.58–0.85) |
| East Sussex      | 1968        | 0.74<br>(0.61–0.89) |
| East Sussex      | 1969        | 0.76<br>(0.62–0.92) |
| East Sussex      | 1970        | 0.79<br>(0.65–0.94) |
| East Sussex      | 1971        | 0.82<br>(0.69–0.97) |
| East Sussex      | 1972        | 0.83<br>(0.7–0.97)  |
| East Sussex      | 1973        | 0.84<br>(0.72–0.97) |
| East Sussex      | 1974        | 0.86<br>(0.74–0.98) |
| East Sussex      | 1975        | 0.87<br>(0.75–0.99) |
| East Sussex      | 1976        | 0.84<br>(0.74–0.95) |
| East Sussex      | 1977        | 0.87<br>(0.77–0.98) |
| East Sussex      | 1978        | 0.92<br>(0.83–1.02) |
| East Sussex      | 1979        | 0.95<br>(0.86–1.05) |
| East Sussex      | 1980        | 0.94<br>(0.87–1.02) |
| East Sussex      | 1981        | 0.9<br>(0.84–0.97)  |
| East Sussex      | 1982        | 0.94<br>(0.88–1.01) |
| East Sussex      | 1983        | 0.95<br>(0.89–1.01) |

**Table 15 Ratio of adjusted to unadjusted 5q0 values for scaled locations by year**

| <b>Geography</b> | <b>Year</b> | <b>Ratio</b>        |
|------------------|-------------|---------------------|
| East Sussex      | 1984        | 0.94<br>(0.88–0.99) |
| East Sussex      | 1985        | 0.98<br>(0.92–1.04) |
| East Sussex      | 1986        | 1.01<br>(0.94–1.06) |
| East Sussex      | 1987        | 1.06<br>(1.01–1.11) |
| East Sussex      | 1988        | 1.09<br>(1.02–1.15) |
| East Sussex      | 1989        | 1.06<br>(1.0–1.12)  |
| East Sussex      | 1990        | 1.04<br>(0.98–1.1)  |
| East Sussex      | 1991        | 0.99<br>(0.93–1.05) |
| East Sussex      | 1992        | 0.91<br>(0.83–0.97) |
| East Sussex      | 1993        | 0.91<br>(0.85–0.97) |
| East Sussex      | 1994        | 0.9<br>(0.83–0.98)  |
| East Sussex      | 1995        | 0.96<br>(0.89–1.03) |
| East Sussex      | 1996        | 1.02<br>(0.95–1.09) |
| East Sussex      | 1997        | 0.99<br>(0.92–1.05) |
| East Sussex      | 1998        | 0.97<br>(0.9–1.04)  |
| East Sussex      | 1999        | 1.0<br>(0.93–1.08)  |
| East Sussex      | 2000        | 0.98<br>(0.89–1.09) |
| East Sussex      | 2001        | 0.98<br>(0.91–1.06) |
| East Sussex      | 2002        | 1.0<br>(0.93–1.08)  |
| East Sussex      | 2003        | 1.05<br>(0.96–1.15) |
| East Sussex      | 2004        | 1.0<br>(0.91–1.1)   |
| East Sussex      | 2005        | 1.01<br>(0.92–1.11) |
| East Sussex      | 2006        | 1.07<br>(0.97–1.16) |
| East Sussex      | 2007        | 1.07<br>(0.98–1.16) |
| East Sussex      | 2008        | 1.07<br>(0.98–1.17) |
| East Sussex      | 2009        | 1.03<br>(0.95–1.13) |
| East Sussex      | 2010        | 0.99<br>(0.92–1.07) |
| East Sussex      | 2011        | 0.99<br>(0.91–1.07) |
| East Sussex      | 2012        | 0.98<br>(0.91–1.06) |
| East Sussex      | 2013        | 0.97<br>(0.89–1.04) |
| East Sussex      | 2014        | 0.96<br>(0.88–1.05) |

**Table 15 Ratio of adjusted to unadjusted 5q0 values for scaled locations by year**

| <b>Geography</b> | <b>Year</b> | <b>Ratio</b>        |
|------------------|-------------|---------------------|
| East Sussex      | 2015        | 0.97<br>(0.89–1.07) |
| East Sussex      | 2016        | 1.0<br>(0.91–1.08)  |
| East Sussex      | 2017        | 1.02<br>(0.88–1.17) |
| Hampshire        | 1950        | 0.63<br>(0.52–0.75) |
| Hampshire        | 1951        | 0.73<br>(0.6–0.89)  |
| Hampshire        | 1952        | 0.69<br>(0.56–0.82) |
| Hampshire        | 1953        | 0.69<br>(0.57–0.83) |
| Hampshire        | 1954        | 0.65<br>(0.54–0.78) |
| Hampshire        | 1955        | 0.66<br>(0.55–0.78) |
| Hampshire        | 1956        | 0.65<br>(0.54–0.77) |
| Hampshire        | 1957        | 0.66<br>(0.55–0.78) |
| Hampshire        | 1958        | 0.65<br>(0.55–0.77) |
| Hampshire        | 1959        | 0.66<br>(0.55–0.77) |
| Hampshire        | 1960        | 0.67<br>(0.57–0.8)  |
| Hampshire        | 1961        | 0.69<br>(0.58–0.82) |
| Hampshire        | 1962        | 0.71<br>(0.59–0.85) |
| Hampshire        | 1963        | 0.72<br>(0.59–0.87) |
| Hampshire        | 1964        | 0.7<br>(0.58–0.84)  |
| Hampshire        | 1965        | 0.69<br>(0.56–0.83) |
| Hampshire        | 1966        | 0.72<br>(0.58–0.86) |
| Hampshire        | 1967        | 0.71<br>(0.58–0.85) |
| Hampshire        | 1968        | 0.74<br>(0.61–0.89) |
| Hampshire        | 1969        | 0.76<br>(0.62–0.92) |
| Hampshire        | 1970        | 0.79<br>(0.65–0.94) |
| Hampshire        | 1971        | 0.82<br>(0.69–0.97) |
| Hampshire        | 1972        | 0.83<br>(0.7–0.97)  |
| Hampshire        | 1973        | 0.84<br>(0.72–0.97) |
| Hampshire        | 1974        | 0.86<br>(0.74–0.98) |
| Hampshire        | 1975        | 0.87<br>(0.75–0.99) |
| Hampshire        | 1976        | 0.84<br>(0.74–0.95) |
| Hampshire        | 1977        | 0.87<br>(0.77–0.98) |

**Table 15 Ratio of adjusted to unadjusted 5q0 values for scaled locations by year**

| <b>Geography</b> | <b>Year</b> | <b>Ratio</b>        |
|------------------|-------------|---------------------|
| Hampshire        | 1978        | 0.92<br>(0.83–1.02) |
| Hampshire        | 1979        | 0.95<br>(0.86–1.05) |
| Hampshire        | 1980        | 0.94<br>(0.87–1.02) |
| Hampshire        | 1981        | 0.9<br>(0.84–0.97)  |
| Hampshire        | 1982        | 0.94<br>(0.88–1.01) |
| Hampshire        | 1983        | 0.95<br>(0.89–1.01) |
| Hampshire        | 1984        | 0.94<br>(0.88–0.99) |
| Hampshire        | 1985        | 0.98<br>(0.92–1.04) |
| Hampshire        | 1986        | 1.01<br>(0.94–1.06) |
| Hampshire        | 1987        | 1.06<br>(1.01–1.11) |
| Hampshire        | 1988        | 1.09<br>(1.02–1.15) |
| Hampshire        | 1989        | 1.06<br>(1.0–1.12)  |
| Hampshire        | 1990        | 1.04<br>(0.98–1.1)  |
| Hampshire        | 1991        | 0.99<br>(0.93–1.05) |
| Hampshire        | 1992        | 0.91<br>(0.83–0.97) |
| Hampshire        | 1993        | 0.91<br>(0.85–0.97) |
| Hampshire        | 1994        | 0.9<br>(0.83–0.98)  |
| Hampshire        | 1995        | 0.96<br>(0.89–1.03) |
| Hampshire        | 1996        | 1.02<br>(0.95–1.09) |
| Hampshire        | 1997        | 0.99<br>(0.92–1.05) |
| Hampshire        | 1998        | 0.97<br>(0.9–1.04)  |
| Hampshire        | 1999        | 1.0<br>(0.93–1.08)  |
| Hampshire        | 2000        | 0.98<br>(0.89–1.09) |
| Hampshire        | 2001        | 0.98<br>(0.91–1.06) |
| Hampshire        | 2002        | 1.0<br>(0.93–1.08)  |
| Hampshire        | 2003        | 1.05<br>(0.96–1.15) |
| Hampshire        | 2004        | 1.0<br>(0.91–1.1)   |
| Hampshire        | 2005        | 1.01<br>(0.92–1.11) |
| Hampshire        | 2006        | 1.07<br>(0.97–1.16) |
| Hampshire        | 2007        | 1.07<br>(0.98–1.16) |
| Hampshire        | 2008        | 1.07<br>(0.98–1.17) |

**Table 15 Ratio of adjusted to unadjusted 5q0 values for scaled locations by year**

| <b>Geography</b> | <b>Year</b> | <b>Ratio</b>        |
|------------------|-------------|---------------------|
| Hampshire        | 2009        | 1.03<br>(0.95–1.13) |
| Hampshire        | 2010        | 0.99<br>(0.92–1.07) |
| Hampshire        | 2011        | 0.99<br>(0.91–1.07) |
| Hampshire        | 2012        | 0.98<br>(0.91–1.06) |
| Hampshire        | 2013        | 0.97<br>(0.89–1.04) |
| Hampshire        | 2014        | 0.96<br>(0.88–1.05) |
| Hampshire        | 2015        | 0.97<br>(0.89–1.07) |
| Hampshire        | 2016        | 1.0<br>(0.91–1.08)  |
| Hampshire        | 2017        | 1.02<br>(0.88–1.17) |
| Isle of Wight    | 1950        | 0.63<br>(0.52–0.75) |
| Isle of Wight    | 1951        | 0.73<br>(0.61–0.89) |
| Isle of Wight    | 1952        | 0.69<br>(0.56–0.82) |
| Isle of Wight    | 1953        | 0.7<br>(0.57–0.83)  |
| Isle of Wight    | 1954        | 0.66<br>(0.55–0.78) |
| Isle of Wight    | 1955        | 0.66<br>(0.55–0.78) |
| Isle of Wight    | 1956        | 0.65<br>(0.54–0.77) |
| Isle of Wight    | 1957        | 0.66<br>(0.56–0.78) |
| Isle of Wight    | 1958        | 0.65<br>(0.55–0.77) |
| Isle of Wight    | 1959        | 0.66<br>(0.55–0.77) |
| Isle of Wight    | 1960        | 0.67<br>(0.57–0.8)  |
| Isle of Wight    | 1961        | 0.69<br>(0.58–0.82) |
| Isle of Wight    | 1962        | 0.71<br>(0.59–0.85) |
| Isle of Wight    | 1963        | 0.72<br>(0.6–0.87)  |
| Isle of Wight    | 1964        | 0.7<br>(0.58–0.84)  |
| Isle of Wight    | 1965        | 0.69<br>(0.56–0.83) |
| Isle of Wight    | 1966        | 0.72<br>(0.59–0.86) |
| Isle of Wight    | 1967        | 0.71<br>(0.58–0.85) |
| Isle of Wight    | 1968        | 0.74<br>(0.61–0.89) |
| Isle of Wight    | 1969        | 0.76<br>(0.63–0.92) |
| Isle of Wight    | 1970        | 0.8<br>(0.66–0.94)  |
| Isle of Wight    | 1971        | 0.82<br>(0.69–0.97) |



**Table 15 Ratio of adjusted to unadjusted 5q0 values for scaled locations by year**

| <b>Geography</b> | <b>Year</b> | <b>Ratio</b>        |
|------------------|-------------|---------------------|
| Isle of Wight    | 1972        | 0.83<br>(0.7–0.97)  |
| Isle of Wight    | 1973        | 0.84<br>(0.72–0.97) |
| Isle of Wight    | 1974        | 0.86<br>(0.74–0.98) |
| Isle of Wight    | 1975        | 0.87<br>(0.75–0.99) |
| Isle of Wight    | 1976        | 0.84<br>(0.74–0.95) |
| Isle of Wight    | 1977        | 0.87<br>(0.77–0.98) |
| Isle of Wight    | 1978        | 0.92<br>(0.83–1.02) |
| Isle of Wight    | 1979        | 0.95<br>(0.86–1.05) |
| Isle of Wight    | 1980        | 0.94<br>(0.87–1.02) |
| Isle of Wight    | 1981        | 0.9<br>(0.84–0.97)  |
| Isle of Wight    | 1982        | 0.94<br>(0.88–1.01) |
| Isle of Wight    | 1983        | 0.95<br>(0.89–1.01) |
| Isle of Wight    | 1984        | 0.94<br>(0.88–0.99) |
| Isle of Wight    | 1985        | 0.98<br>(0.92–1.04) |
| Isle of Wight    | 1986        | 1.01<br>(0.94–1.06) |
| Isle of Wight    | 1987        | 1.06<br>(1.01–1.11) |
| Isle of Wight    | 1988        | 1.09<br>(1.02–1.15) |
| Isle of Wight    | 1989        | 1.06<br>(1.0–1.12)  |
| Isle of Wight    | 1990        | 1.04<br>(0.98–1.1)  |
| Isle of Wight    | 1991        | 0.99<br>(0.93–1.05) |
| Isle of Wight    | 1992        | 0.91<br>(0.83–0.97) |
| Isle of Wight    | 1993        | 0.91<br>(0.85–0.97) |
| Isle of Wight    | 1994        | 0.9<br>(0.83–0.98)  |
| Isle of Wight    | 1995        | 0.96<br>(0.89–1.03) |
| Isle of Wight    | 1996        | 1.02<br>(0.95–1.09) |
| Isle of Wight    | 1997        | 0.99<br>(0.92–1.05) |
| Isle of Wight    | 1998        | 0.97<br>(0.9–1.04)  |
| Isle of Wight    | 1999        | 1.0<br>(0.93–1.08)  |
| Isle of Wight    | 2000        | 0.98<br>(0.89–1.09) |
| Isle of Wight    | 2001        | 0.98<br>(0.91–1.06) |
| Isle of Wight    | 2002        | 1.0<br>(0.93–1.08)  |

**Table 15 Ratio of adjusted to unadjusted 5q0 values for scaled locations by year**

| <b>Geography</b> | <b>Year</b> | <b>Ratio</b>        |
|------------------|-------------|---------------------|
| Isle of Wight    | 2003        | 1.05<br>(0.96–1.15) |
| Isle of Wight    | 2004        | 1.0<br>(0.91–1.1)   |
| Isle of Wight    | 2005        | 1.01<br>(0.92–1.11) |
| Isle of Wight    | 2006        | 1.07<br>(0.97–1.16) |
| Isle of Wight    | 2007        | 1.07<br>(0.98–1.16) |
| Isle of Wight    | 2008        | 1.07<br>(0.98–1.17) |
| Isle of Wight    | 2009        | 1.03<br>(0.95–1.13) |
| Isle of Wight    | 2010        | 0.99<br>(0.92–1.07) |
| Isle of Wight    | 2011        | 0.99<br>(0.91–1.07) |
| Isle of Wight    | 2012        | 0.98<br>(0.91–1.06) |
| Isle of Wight    | 2013        | 0.97<br>(0.89–1.04) |
| Isle of Wight    | 2014        | 0.96<br>(0.88–1.05) |
| Isle of Wight    | 2015        | 0.97<br>(0.89–1.07) |
| Isle of Wight    | 2016        | 1.0<br>(0.91–1.08)  |
| Isle of Wight    | 2017        | 1.02<br>(0.88–1.17) |
| Kent             | 1950        | 0.63<br>(0.52–0.75) |
| Kent             | 1951        | 0.73<br>(0.6–0.89)  |
| Kent             | 1952        | 0.69<br>(0.56–0.82) |
| Kent             | 1953        | 0.69<br>(0.57–0.83) |
| Kent             | 1954        | 0.65<br>(0.54–0.78) |
| Kent             | 1955        | 0.66<br>(0.55–0.78) |
| Kent             | 1956        | 0.65<br>(0.54–0.77) |
| Kent             | 1957        | 0.66<br>(0.55–0.78) |
| Kent             | 1958        | 0.65<br>(0.55–0.77) |
| Kent             | 1959        | 0.66<br>(0.55–0.77) |
| Kent             | 1960        | 0.67<br>(0.57–0.8)  |
| Kent             | 1961        | 0.69<br>(0.58–0.82) |
| Kent             | 1962        | 0.71<br>(0.59–0.85) |
| Kent             | 1963        | 0.72<br>(0.59–0.87) |
| Kent             | 1964        | 0.7<br>(0.58–0.84)  |
| Kent             | 1965        | 0.69<br>(0.56–0.83) |

**Table 15 Ratio of adjusted to unadjusted 5q0 values for scaled locations by year**

| <b>Geography</b> | <b>Year</b> | <b>Ratio</b>        |
|------------------|-------------|---------------------|
| Kent             | 1966        | 0.72<br>(0.58–0.86) |
| Kent             | 1967        | 0.71<br>(0.58–0.85) |
| Kent             | 1968        | 0.74<br>(0.61–0.89) |
| Kent             | 1969        | 0.76<br>(0.62–0.92) |
| Kent             | 1970        | 0.79<br>(0.65–0.94) |
| Kent             | 1971        | 0.82<br>(0.69–0.97) |
| Kent             | 1972        | 0.83<br>(0.7–0.97)  |
| Kent             | 1973        | 0.84<br>(0.72–0.97) |
| Kent             | 1974        | 0.86<br>(0.74–0.98) |
| Kent             | 1975        | 0.87<br>(0.75–0.99) |
| Kent             | 1976        | 0.84<br>(0.74–0.95) |
| Kent             | 1977        | 0.87<br>(0.77–0.98) |
| Kent             | 1978        | 0.92<br>(0.83–1.02) |
| Kent             | 1979        | 0.95<br>(0.86–1.05) |
| Kent             | 1980        | 0.94<br>(0.87–1.02) |
| Kent             | 1981        | 0.9<br>(0.84–0.97)  |
| Kent             | 1982        | 0.94<br>(0.88–1.01) |
| Kent             | 1983        | 0.95<br>(0.89–1.01) |
| Kent             | 1984        | 0.94<br>(0.88–0.99) |
| Kent             | 1985        | 0.98<br>(0.92–1.04) |
| Kent             | 1986        | 1.01<br>(0.94–1.06) |
| Kent             | 1987        | 1.06<br>(1.01–1.11) |
| Kent             | 1988        | 1.09<br>(1.02–1.15) |
| Kent             | 1989        | 1.06<br>(1.0–1.12)  |
| Kent             | 1990        | 1.04<br>(0.98–1.1)  |
| Kent             | 1991        | 0.99<br>(0.93–1.05) |
| Kent             | 1992        | 0.91<br>(0.83–0.97) |
| Kent             | 1993        | 0.91<br>(0.85–0.97) |
| Kent             | 1994        | 0.9<br>(0.83–0.98)  |
| Kent             | 1995        | 0.96<br>(0.89–1.03) |
| Kent             | 1996        | 1.02<br>(0.95–1.09) |

**Table 15 Ratio of adjusted to unadjusted 5q0 values for scaled locations by year**

| <b>Geography</b> | <b>Year</b> | <b>Ratio</b>        |
|------------------|-------------|---------------------|
| Kent             | 1997        | 0.99<br>(0.92–1.05) |
| Kent             | 1998        | 0.97<br>(0.9–1.04)  |
| Kent             | 1999        | 1.0<br>(0.93–1.08)  |
| Kent             | 2000        | 0.98<br>(0.89–1.09) |
| Kent             | 2001        | 0.98<br>(0.91–1.06) |
| Kent             | 2002        | 1.0<br>(0.93–1.08)  |
| Kent             | 2003        | 1.05<br>(0.96–1.15) |
| Kent             | 2004        | 1.0<br>(0.91–1.1)   |
| Kent             | 2005        | 1.01<br>(0.92–1.11) |
| Kent             | 2006        | 1.07<br>(0.97–1.16) |
| Kent             | 2007        | 1.07<br>(0.98–1.16) |
| Kent             | 2008        | 1.07<br>(0.98–1.17) |
| Kent             | 2009        | 1.03<br>(0.95–1.13) |
| Kent             | 2010        | 0.99<br>(0.92–1.07) |
| Kent             | 2011        | 0.99<br>(0.91–1.07) |
| Kent             | 2012        | 0.98<br>(0.91–1.06) |
| Kent             | 2013        | 0.97<br>(0.89–1.04) |
| Kent             | 2014        | 0.96<br>(0.88–1.05) |
| Kent             | 2015        | 0.97<br>(0.89–1.07) |
| Kent             | 2016        | 1.0<br>(0.91–1.08)  |
| Kent             | 2017        | 1.02<br>(0.88–1.17) |
| Medway           | 1950        | 0.63<br>(0.52–0.75) |
| Medway           | 1951        | 0.73<br>(0.6–0.89)  |
| Medway           | 1952        | 0.69<br>(0.56–0.82) |
| Medway           | 1953        | 0.69<br>(0.57–0.83) |
| Medway           | 1954        | 0.66<br>(0.54–0.78) |
| Medway           | 1955        | 0.66<br>(0.55–0.78) |
| Medway           | 1956        | 0.65<br>(0.54–0.77) |
| Medway           | 1957        | 0.66<br>(0.56–0.78) |
| Medway           | 1958        | 0.65<br>(0.55–0.77) |
| Medway           | 1959        | 0.66<br>(0.55–0.77) |

**Table 15 Ratio of adjusted to unadjusted 5q0 values for scaled locations by year**

| <b>Geography</b> | <b>Year</b> | <b>Ratio</b>        |
|------------------|-------------|---------------------|
| Medway           | 1960        | 0.67<br>(0.57–0.8)  |
| Medway           | 1961        | 0.69<br>(0.58–0.82) |
| Medway           | 1962        | 0.71<br>(0.59–0.85) |
| Medway           | 1963        | 0.72<br>(0.59–0.87) |
| Medway           | 1964        | 0.7<br>(0.58–0.84)  |
| Medway           | 1965        | 0.69<br>(0.56–0.83) |
| Medway           | 1966        | 0.72<br>(0.59–0.86) |
| Medway           | 1967        | 0.71<br>(0.58–0.85) |
| Medway           | 1968        | 0.74<br>(0.61–0.89) |
| Medway           | 1969        | 0.76<br>(0.62–0.92) |
| Medway           | 1970        | 0.8<br>(0.66–0.94)  |
| Medway           | 1971        | 0.82<br>(0.69–0.97) |
| Medway           | 1972        | 0.83<br>(0.7–0.97)  |
| Medway           | 1973        | 0.84<br>(0.72–0.97) |
| Medway           | 1974        | 0.86<br>(0.74–0.98) |
| Medway           | 1975        | 0.87<br>(0.75–0.99) |
| Medway           | 1976        | 0.84<br>(0.74–0.95) |
| Medway           | 1977        | 0.87<br>(0.77–0.98) |
| Medway           | 1978        | 0.92<br>(0.83–1.02) |
| Medway           | 1979        | 0.95<br>(0.86–1.05) |
| Medway           | 1980        | 0.94<br>(0.87–1.02) |
| Medway           | 1981        | 0.9<br>(0.84–0.97)  |
| Medway           | 1982        | 0.94<br>(0.88–1.01) |
| Medway           | 1983        | 0.95<br>(0.89–1.01) |
| Medway           | 1984        | 0.94<br>(0.88–0.99) |
| Medway           | 1985        | 0.98<br>(0.92–1.04) |
| Medway           | 1986        | 1.01<br>(0.94–1.06) |
| Medway           | 1987        | 1.06<br>(1.01–1.11) |
| Medway           | 1988        | 1.09<br>(1.02–1.15) |
| Medway           | 1989        | 1.06<br>(1.0–1.12)  |
| Medway           | 1990        | 1.04<br>(0.98–1.1)  |

**Table 15 Ratio of adjusted to unadjusted 5q0 values for scaled locations by year**

| <b>Geography</b> | <b>Year</b> | <b>Ratio</b>        |
|------------------|-------------|---------------------|
| Medway           | 1991        | 0.99<br>(0.93–1.05) |
| Medway           | 1992        | 0.91<br>(0.83–0.97) |
| Medway           | 1993        | 0.91<br>(0.85–0.97) |
| Medway           | 1994        | 0.9<br>(0.83–0.98)  |
| Medway           | 1995        | 0.96<br>(0.89–1.03) |
| Medway           | 1996        | 1.02<br>(0.95–1.09) |
| Medway           | 1997        | 0.99<br>(0.92–1.05) |
| Medway           | 1998        | 0.97<br>(0.9–1.04)  |
| Medway           | 1999        | 1.0<br>(0.93–1.08)  |
| Medway           | 2000        | 0.98<br>(0.89–1.09) |
| Medway           | 2001        | 0.98<br>(0.91–1.06) |
| Medway           | 2002        | 1.0<br>(0.93–1.08)  |
| Medway           | 2003        | 1.05<br>(0.96–1.15) |
| Medway           | 2004        | 1.0<br>(0.91–1.1)   |
| Medway           | 2005        | 1.01<br>(0.92–1.11) |
| Medway           | 2006        | 1.07<br>(0.97–1.16) |
| Medway           | 2007        | 1.07<br>(0.98–1.16) |
| Medway           | 2008        | 1.07<br>(0.98–1.17) |
| Medway           | 2009        | 1.03<br>(0.95–1.13) |
| Medway           | 2010        | 0.99<br>(0.92–1.07) |
| Medway           | 2011        | 0.99<br>(0.91–1.07) |
| Medway           | 2012        | 0.98<br>(0.91–1.06) |
| Medway           | 2013        | 0.97<br>(0.89–1.04) |
| Medway           | 2014        | 0.96<br>(0.88–1.05) |
| Medway           | 2015        | 0.97<br>(0.89–1.07) |
| Medway           | 2016        | 1.0<br>(0.91–1.08)  |
| Medway           | 2017        | 1.02<br>(0.88–1.17) |
| Milton Keynes    | 1950        | 0.63<br>(0.52–0.75) |
| Milton Keynes    | 1951        | 0.73<br>(0.6–0.89)  |
| Milton Keynes    | 1952        | 0.69<br>(0.56–0.82) |
| Milton Keynes    | 1953        | 0.69<br>(0.57–0.83) |

**Table 15 Ratio of adjusted to unadjusted 5q0 values for scaled locations by year**

| <b>Geography</b> | <b>Year</b> | <b>Ratio</b>        |
|------------------|-------------|---------------------|
| Milton Keynes    | 1954        | 0.66<br>(0.54–0.78) |
| Milton Keynes    | 1955        | 0.66<br>(0.55–0.78) |
| Milton Keynes    | 1956        | 0.65<br>(0.54–0.77) |
| Milton Keynes    | 1957        | 0.66<br>(0.55–0.78) |
| Milton Keynes    | 1958        | 0.65<br>(0.55–0.77) |
| Milton Keynes    | 1959        | 0.66<br>(0.55–0.77) |
| Milton Keynes    | 1960        | 0.67<br>(0.57–0.8)  |
| Milton Keynes    | 1961        | 0.69<br>(0.58–0.82) |
| Milton Keynes    | 1962        | 0.71<br>(0.59–0.85) |
| Milton Keynes    | 1963        | 0.72<br>(0.59–0.87) |
| Milton Keynes    | 1964        | 0.7<br>(0.58–0.84)  |
| Milton Keynes    | 1965        | 0.69<br>(0.56–0.83) |
| Milton Keynes    | 1966        | 0.72<br>(0.59–0.86) |
| Milton Keynes    | 1967        | 0.71<br>(0.58–0.85) |
| Milton Keynes    | 1968        | 0.74<br>(0.61–0.89) |
| Milton Keynes    | 1969        | 0.76<br>(0.62–0.92) |
| Milton Keynes    | 1970        | 0.79<br>(0.65–0.94) |
| Milton Keynes    | 1971        | 0.82<br>(0.69–0.97) |
| Milton Keynes    | 1972        | 0.83<br>(0.7–0.97)  |
| Milton Keynes    | 1973        | 0.84<br>(0.72–0.97) |
| Milton Keynes    | 1974        | 0.86<br>(0.74–0.98) |
| Milton Keynes    | 1975        | 0.87<br>(0.75–0.99) |
| Milton Keynes    | 1976        | 0.84<br>(0.74–0.95) |
| Milton Keynes    | 1977        | 0.87<br>(0.77–0.98) |
| Milton Keynes    | 1978        | 0.92<br>(0.83–1.02) |
| Milton Keynes    | 1979        | 0.95<br>(0.86–1.05) |
| Milton Keynes    | 1980        | 0.94<br>(0.87–1.02) |
| Milton Keynes    | 1981        | 0.9<br>(0.84–0.97)  |
| Milton Keynes    | 1982        | 0.94<br>(0.88–1.01) |
| Milton Keynes    | 1983        | 0.95<br>(0.89–1.01) |
| Milton Keynes    | 1984        | 0.94<br>(0.88–0.99) |

**Table 15 Ratio of adjusted to unadjusted 5q0 values for scaled locations by year**

| <b>Geography</b> | <b>Year</b> | <b>Ratio</b>        |
|------------------|-------------|---------------------|
| Milton Keynes    | 1985        | 0.98<br>(0.92–1.04) |
| Milton Keynes    | 1986        | 1.01<br>(0.94–1.06) |
| Milton Keynes    | 1987        | 1.06<br>(1.01–1.11) |
| Milton Keynes    | 1988        | 1.09<br>(1.02–1.15) |
| Milton Keynes    | 1989        | 1.06<br>(1.0–1.12)  |
| Milton Keynes    | 1990        | 1.04<br>(0.98–1.1)  |
| Milton Keynes    | 1991        | 0.99<br>(0.93–1.05) |
| Milton Keynes    | 1992        | 0.91<br>(0.83–0.97) |
| Milton Keynes    | 1993        | 0.91<br>(0.85–0.97) |
| Milton Keynes    | 1994        | 0.9<br>(0.83–0.98)  |
| Milton Keynes    | 1995        | 0.96<br>(0.89–1.03) |
| Milton Keynes    | 1996        | 1.02<br>(0.95–1.09) |
| Milton Keynes    | 1997        | 0.99<br>(0.92–1.05) |
| Milton Keynes    | 1998        | 0.97<br>(0.9–1.04)  |
| Milton Keynes    | 1999        | 1.0<br>(0.93–1.08)  |
| Milton Keynes    | 2000        | 0.98<br>(0.89–1.09) |
| Milton Keynes    | 2001        | 0.98<br>(0.91–1.06) |
| Milton Keynes    | 2002        | 1.0<br>(0.93–1.08)  |
| Milton Keynes    | 2003        | 1.05<br>(0.96–1.15) |
| Milton Keynes    | 2004        | 1.0<br>(0.91–1.1)   |
| Milton Keynes    | 2005        | 1.01<br>(0.92–1.11) |
| Milton Keynes    | 2006        | 1.07<br>(0.97–1.16) |
| Milton Keynes    | 2007        | 1.07<br>(0.98–1.16) |
| Milton Keynes    | 2008        | 1.07<br>(0.98–1.17) |
| Milton Keynes    | 2009        | 1.03<br>(0.95–1.13) |
| Milton Keynes    | 2010        | 0.99<br>(0.92–1.07) |
| Milton Keynes    | 2011        | 0.99<br>(0.91–1.07) |
| Milton Keynes    | 2012        | 0.98<br>(0.91–1.06) |
| Milton Keynes    | 2013        | 0.97<br>(0.89–1.04) |
| Milton Keynes    | 2014        | 0.96<br>(0.88–1.05) |
| Milton Keynes    | 2015        | 0.97<br>(0.89–1.07) |



**Table 15 Ratio of adjusted to unadjusted 5q0 values for scaled locations by year**

| <b>Geography</b> | <b>Year</b> | <b>Ratio</b>        |
|------------------|-------------|---------------------|
| Milton Keynes    | 2016        | 1.0<br>(0.91–1.08)  |
| Milton Keynes    | 2017        | 1.02<br>(0.88–1.17) |
| Oxfordshire      | 1950        | 0.63<br>(0.52–0.75) |
| Oxfordshire      | 1951        | 0.73<br>(0.6–0.88)  |
| Oxfordshire      | 1952        | 0.69<br>(0.56–0.82) |
| Oxfordshire      | 1953        | 0.69<br>(0.57–0.83) |
| Oxfordshire      | 1954        | 0.65<br>(0.54–0.78) |
| Oxfordshire      | 1955        | 0.66<br>(0.55–0.78) |
| Oxfordshire      | 1956        | 0.65<br>(0.54–0.77) |
| Oxfordshire      | 1957        | 0.66<br>(0.55–0.78) |
| Oxfordshire      | 1958        | 0.65<br>(0.55–0.77) |
| Oxfordshire      | 1959        | 0.66<br>(0.55–0.77) |
| Oxfordshire      | 1960        | 0.67<br>(0.56–0.79) |
| Oxfordshire      | 1961        | 0.69<br>(0.58–0.82) |
| Oxfordshire      | 1962        | 0.71<br>(0.59–0.85) |
| Oxfordshire      | 1963        | 0.72<br>(0.59–0.87) |
| Oxfordshire      | 1964        | 0.7<br>(0.58–0.84)  |
| Oxfordshire      | 1965        | 0.69<br>(0.56–0.83) |
| Oxfordshire      | 1966        | 0.72<br>(0.58–0.86) |
| Oxfordshire      | 1967        | 0.71<br>(0.58–0.85) |
| Oxfordshire      | 1968        | 0.74<br>(0.61–0.89) |
| Oxfordshire      | 1969        | 0.76<br>(0.62–0.92) |
| Oxfordshire      | 1970        | 0.79<br>(0.65–0.94) |
| Oxfordshire      | 1971        | 0.82<br>(0.69–0.97) |
| Oxfordshire      | 1972        | 0.83<br>(0.7–0.97)  |
| Oxfordshire      | 1973        | 0.84<br>(0.72–0.97) |
| Oxfordshire      | 1974        | 0.86<br>(0.74–0.98) |
| Oxfordshire      | 1975        | 0.87<br>(0.75–0.99) |
| Oxfordshire      | 1976        | 0.84<br>(0.74–0.95) |
| Oxfordshire      | 1977        | 0.87<br>(0.77–0.98) |
| Oxfordshire      | 1978        | 0.92<br>(0.83–1.02) |

**Table 15 Ratio of adjusted to unadjusted 5q0 values for scaled locations by year**

| <b>Geography</b> | <b>Year</b> | <b>Ratio</b>        |
|------------------|-------------|---------------------|
| Oxfordshire      | 1979        | 0.95<br>(0.86–1.05) |
| Oxfordshire      | 1980        | 0.94<br>(0.87–1.02) |
| Oxfordshire      | 1981        | 0.9<br>(0.84–0.97)  |
| Oxfordshire      | 1982        | 0.94<br>(0.88–1.01) |
| Oxfordshire      | 1983        | 0.95<br>(0.89–1.01) |
| Oxfordshire      | 1984        | 0.94<br>(0.88–0.99) |
| Oxfordshire      | 1985        | 0.98<br>(0.92–1.04) |
| Oxfordshire      | 1986        | 1.01<br>(0.94–1.07) |
| Oxfordshire      | 1987        | 1.06<br>(1.01–1.11) |
| Oxfordshire      | 1988        | 1.09<br>(1.02–1.15) |
| Oxfordshire      | 1989        | 1.06<br>(1.0–1.12)  |
| Oxfordshire      | 1990        | 1.04<br>(0.98–1.1)  |
| Oxfordshire      | 1991        | 0.99<br>(0.93–1.05) |
| Oxfordshire      | 1992        | 0.91<br>(0.83–0.97) |
| Oxfordshire      | 1993        | 0.91<br>(0.85–0.97) |
| Oxfordshire      | 1994        | 0.9<br>(0.83–0.98)  |
| Oxfordshire      | 1995        | 0.96<br>(0.89–1.03) |
| Oxfordshire      | 1996        | 1.02<br>(0.95–1.09) |
| Oxfordshire      | 1997        | 0.99<br>(0.92–1.05) |
| Oxfordshire      | 1998        | 0.97<br>(0.9–1.04)  |
| Oxfordshire      | 1999        | 1.0<br>(0.93–1.08)  |
| Oxfordshire      | 2000        | 0.98<br>(0.89–1.09) |
| Oxfordshire      | 2001        | 0.98<br>(0.91–1.06) |
| Oxfordshire      | 2002        | 1.0<br>(0.93–1.08)  |
| Oxfordshire      | 2003        | 1.05<br>(0.96–1.15) |
| Oxfordshire      | 2004        | 1.0<br>(0.91–1.1)   |
| Oxfordshire      | 2005        | 1.01<br>(0.92–1.11) |
| Oxfordshire      | 2006        | 1.07<br>(0.97–1.16) |
| Oxfordshire      | 2007        | 1.07<br>(0.98–1.16) |
| Oxfordshire      | 2008        | 1.07<br>(0.98–1.17) |
| Oxfordshire      | 2009        | 1.03<br>(0.95–1.13) |

**Table 15 Ratio of adjusted to unadjusted 5q0 values for scaled locations by year**

| <b>Geography</b> | <b>Year</b> | <b>Ratio</b>        |
|------------------|-------------|---------------------|
| Oxfordshire      | 2010        | 0.99<br>(0.92–1.07) |
| Oxfordshire      | 2011        | 0.99<br>(0.91–1.07) |
| Oxfordshire      | 2012        | 0.98<br>(0.91–1.06) |
| Oxfordshire      | 2013        | 0.97<br>(0.89–1.04) |
| Oxfordshire      | 2014        | 0.96<br>(0.88–1.05) |
| Oxfordshire      | 2015        | 0.97<br>(0.89–1.07) |
| Oxfordshire      | 2016        | 1.0<br>(0.91–1.08)  |
| Oxfordshire      | 2017        | 1.02<br>(0.88–1.17) |
| Portsmouth       | 1950        | 0.63<br>(0.52–0.75) |
| Portsmouth       | 1951        | 0.73<br>(0.6–0.89)  |
| Portsmouth       | 1952        | 0.69<br>(0.56–0.82) |
| Portsmouth       | 1953        | 0.69<br>(0.57–0.83) |
| Portsmouth       | 1954        | 0.66<br>(0.54–0.78) |
| Portsmouth       | 1955        | 0.66<br>(0.55–0.78) |
| Portsmouth       | 1956        | 0.65<br>(0.54–0.77) |
| Portsmouth       | 1957        | 0.66<br>(0.56–0.78) |
| Portsmouth       | 1958        | 0.65<br>(0.55–0.77) |
| Portsmouth       | 1959        | 0.66<br>(0.55–0.77) |
| Portsmouth       | 1960        | 0.67<br>(0.57–0.8)  |
| Portsmouth       | 1961        | 0.69<br>(0.58–0.82) |
| Portsmouth       | 1962        | 0.71<br>(0.59–0.85) |
| Portsmouth       | 1963        | 0.72<br>(0.59–0.87) |
| Portsmouth       | 1964        | 0.7<br>(0.58–0.84)  |
| Portsmouth       | 1965        | 0.69<br>(0.56–0.83) |
| Portsmouth       | 1966        | 0.72<br>(0.59–0.86) |
| Portsmouth       | 1967        | 0.71<br>(0.58–0.85) |
| Portsmouth       | 1968        | 0.74<br>(0.61–0.89) |
| Portsmouth       | 1969        | 0.76<br>(0.63–0.92) |
| Portsmouth       | 1970        | 0.8<br>(0.66–0.94)  |
| Portsmouth       | 1971        | 0.82<br>(0.69–0.97) |
| Portsmouth       | 1972        | 0.83<br>(0.7–0.97)  |

**Table 15 Ratio of adjusted to unadjusted 5q0 values for scaled locations by year**

| <b>Geography</b> | <b>Year</b> | <b>Ratio</b>        |
|------------------|-------------|---------------------|
| Portsmouth       | 1973        | 0.84<br>(0.72–0.97) |
| Portsmouth       | 1974        | 0.86<br>(0.74–0.98) |
| Portsmouth       | 1975        | 0.87<br>(0.75–0.99) |
| Portsmouth       | 1976        | 0.84<br>(0.74–0.95) |
| Portsmouth       | 1977        | 0.87<br>(0.77–0.98) |
| Portsmouth       | 1978        | 0.92<br>(0.83–1.02) |
| Portsmouth       | 1979        | 0.95<br>(0.86–1.05) |
| Portsmouth       | 1980        | 0.94<br>(0.87–1.02) |
| Portsmouth       | 1981        | 0.9<br>(0.84–0.97)  |
| Portsmouth       | 1982        | 0.94<br>(0.88–1.01) |
| Portsmouth       | 1983        | 0.95<br>(0.89–1.01) |
| Portsmouth       | 1984        | 0.94<br>(0.88–0.99) |
| Portsmouth       | 1985        | 0.98<br>(0.92–1.04) |
| Portsmouth       | 1986        | 1.01<br>(0.94–1.06) |
| Portsmouth       | 1987        | 1.06<br>(1.01–1.11) |
| Portsmouth       | 1988        | 1.09<br>(1.02–1.15) |
| Portsmouth       | 1989        | 1.06<br>(1.0–1.12)  |
| Portsmouth       | 1990        | 1.04<br>(0.98–1.1)  |
| Portsmouth       | 1991        | 0.99<br>(0.93–1.05) |
| Portsmouth       | 1992        | 0.91<br>(0.83–0.97) |
| Portsmouth       | 1993        | 0.91<br>(0.85–0.97) |
| Portsmouth       | 1994        | 0.9<br>(0.83–0.98)  |
| Portsmouth       | 1995        | 0.96<br>(0.89–1.03) |
| Portsmouth       | 1996        | 1.02<br>(0.95–1.09) |
| Portsmouth       | 1997        | 0.99<br>(0.92–1.05) |
| Portsmouth       | 1998        | 0.97<br>(0.9–1.04)  |
| Portsmouth       | 1999        | 1.0<br>(0.93–1.08)  |
| Portsmouth       | 2000        | 0.98<br>(0.89–1.09) |
| Portsmouth       | 2001        | 0.98<br>(0.91–1.06) |
| Portsmouth       | 2002        | 1.0<br>(0.93–1.08)  |
| Portsmouth       | 2003        | 1.05<br>(0.96–1.15) |

**Table 15 Ratio of adjusted to unadjusted 5q0 values for scaled locations by year**

| <b>Geography</b> | <b>Year</b> | <b>Ratio</b>        |
|------------------|-------------|---------------------|
| Portsmouth       | 2004        | 1.0<br>(0.91–1.1)   |
| Portsmouth       | 2005        | 1.01<br>(0.92–1.11) |
| Portsmouth       | 2006        | 1.07<br>(0.97–1.16) |
| Portsmouth       | 2007        | 1.07<br>(0.98–1.16) |
| Portsmouth       | 2008        | 1.07<br>(0.98–1.17) |
| Portsmouth       | 2009        | 1.03<br>(0.95–1.13) |
| Portsmouth       | 2010        | 0.99<br>(0.92–1.07) |
| Portsmouth       | 2011        | 0.99<br>(0.91–1.07) |
| Portsmouth       | 2012        | 0.98<br>(0.91–1.06) |
| Portsmouth       | 2013        | 0.97<br>(0.89–1.04) |
| Portsmouth       | 2014        | 0.96<br>(0.88–1.05) |
| Portsmouth       | 2015        | 0.97<br>(0.89–1.07) |
| Portsmouth       | 2016        | 1.0<br>(0.91–1.08)  |
| Portsmouth       | 2017        | 1.02<br>(0.88–1.17) |
| Reading          | 1950        | 0.63<br>(0.52–0.75) |
| Reading          | 1951        | 0.73<br>(0.6–0.89)  |
| Reading          | 1952        | 0.69<br>(0.56–0.82) |
| Reading          | 1953        | 0.69<br>(0.57–0.83) |
| Reading          | 1954        | 0.65<br>(0.54–0.78) |
| Reading          | 1955        | 0.66<br>(0.55–0.78) |
| Reading          | 1956        | 0.65<br>(0.54–0.77) |
| Reading          | 1957        | 0.66<br>(0.55–0.78) |
| Reading          | 1958        | 0.65<br>(0.55–0.77) |
| Reading          | 1959        | 0.66<br>(0.55–0.77) |
| Reading          | 1960        | 0.67<br>(0.57–0.8)  |
| Reading          | 1961        | 0.69<br>(0.58–0.82) |
| Reading          | 1962        | 0.71<br>(0.59–0.85) |
| Reading          | 1963        | 0.72<br>(0.59–0.87) |
| Reading          | 1964        | 0.7<br>(0.58–0.84)  |
| Reading          | 1965        | 0.69<br>(0.56–0.83) |
| Reading          | 1966        | 0.72<br>(0.58–0.86) |

**Table 15 Ratio of adjusted to unadjusted 5q0 values for scaled locations by year**

| <b>Geography</b> | <b>Year</b> | <b>Ratio</b>        |
|------------------|-------------|---------------------|
| Reading          | 1967        | 0.71<br>(0.58–0.85) |
| Reading          | 1968        | 0.74<br>(0.61–0.89) |
| Reading          | 1969        | 0.76<br>(0.62–0.92) |
| Reading          | 1970        | 0.79<br>(0.65–0.94) |
| Reading          | 1971        | 0.82<br>(0.69–0.97) |
| Reading          | 1972        | 0.83<br>(0.7–0.97)  |
| Reading          | 1973        | 0.84<br>(0.72–0.97) |
| Reading          | 1974        | 0.86<br>(0.74–0.98) |
| Reading          | 1975        | 0.87<br>(0.75–0.99) |
| Reading          | 1976        | 0.84<br>(0.74–0.95) |
| Reading          | 1977        | 0.87<br>(0.77–0.98) |
| Reading          | 1978        | 0.92<br>(0.83–1.02) |
| Reading          | 1979        | 0.95<br>(0.86–1.05) |
| Reading          | 1980        | 0.94<br>(0.87–1.02) |
| Reading          | 1981        | 0.9<br>(0.84–0.97)  |
| Reading          | 1982        | 0.94<br>(0.88–1.01) |
| Reading          | 1983        | 0.95<br>(0.89–1.01) |
| Reading          | 1984        | 0.94<br>(0.88–0.99) |
| Reading          | 1985        | 0.98<br>(0.92–1.04) |
| Reading          | 1986        | 1.01<br>(0.94–1.07) |
| Reading          | 1987        | 1.06<br>(1.01–1.11) |
| Reading          | 1988        | 1.09<br>(1.02–1.15) |
| Reading          | 1989        | 1.06<br>(1.0–1.12)  |
| Reading          | 1990        | 1.04<br>(0.98–1.1)  |
| Reading          | 1991        | 0.99<br>(0.93–1.05) |
| Reading          | 1992        | 0.91<br>(0.83–0.97) |
| Reading          | 1993        | 0.91<br>(0.85–0.97) |
| Reading          | 1994        | 0.9<br>(0.83–0.98)  |
| Reading          | 1995        | 0.96<br>(0.89–1.03) |
| Reading          | 1996        | 1.02<br>(0.95–1.09) |
| Reading          | 1997        | 0.99<br>(0.92–1.05) |

**Table 15 Ratio of adjusted to unadjusted 5q0 values for scaled locations by year**

| <b>Geography</b> | <b>Year</b> | <b>Ratio</b>        |
|------------------|-------------|---------------------|
| Reading          | 1998        | 0.97<br>(0.9–1.04)  |
| Reading          | 1999        | 1.0<br>(0.93–1.08)  |
| Reading          | 2000        | 0.98<br>(0.89–1.09) |
| Reading          | 2001        | 0.98<br>(0.91–1.06) |
| Reading          | 2002        | 1.0<br>(0.93–1.08)  |
| Reading          | 2003        | 1.05<br>(0.96–1.15) |
| Reading          | 2004        | 1.0<br>(0.91–1.1)   |
| Reading          | 2005        | 1.01<br>(0.92–1.11) |
| Reading          | 2006        | 1.07<br>(0.97–1.16) |
| Reading          | 2007        | 1.07<br>(0.98–1.16) |
| Reading          | 2008        | 1.07<br>(0.98–1.17) |
| Reading          | 2009        | 1.03<br>(0.95–1.13) |
| Reading          | 2010        | 0.99<br>(0.92–1.07) |
| Reading          | 2011        | 0.99<br>(0.91–1.07) |
| Reading          | 2012        | 0.98<br>(0.91–1.06) |
| Reading          | 2013        | 0.97<br>(0.89–1.04) |
| Reading          | 2014        | 0.96<br>(0.88–1.05) |
| Reading          | 2015        | 0.97<br>(0.89–1.07) |
| Reading          | 2016        | 1.0<br>(0.91–1.08)  |
| Reading          | 2017        | 1.02<br>(0.88–1.17) |
| Slough           | 1950        | 0.63<br>(0.52–0.75) |
| Slough           | 1951        | 0.73<br>(0.6–0.89)  |
| Slough           | 1952        | 0.69<br>(0.56–0.82) |
| Slough           | 1953        | 0.69<br>(0.57–0.83) |
| Slough           | 1954        | 0.66<br>(0.54–0.78) |
| Slough           | 1955        | 0.66<br>(0.55–0.78) |
| Slough           | 1956        | 0.65<br>(0.54–0.77) |
| Slough           | 1957        | 0.66<br>(0.56–0.78) |
| Slough           | 1958        | 0.65<br>(0.55–0.77) |
| Slough           | 1959        | 0.66<br>(0.55–0.77) |
| Slough           | 1960        | 0.67<br>(0.57–0.8)  |

**Table 15 Ratio of adjusted to unadjusted 5q0 values for scaled locations by year**

| <b>Geography</b> | <b>Year</b> | <b>Ratio</b>        |
|------------------|-------------|---------------------|
| Slough           | 1961        | 0.69<br>(0.58–0.82) |
| Slough           | 1962        | 0.71<br>(0.59–0.85) |
| Slough           | 1963        | 0.72<br>(0.59–0.87) |
| Slough           | 1964        | 0.7<br>(0.58–0.84)  |
| Slough           | 1965        | 0.69<br>(0.56–0.83) |
| Slough           | 1966        | 0.72<br>(0.59–0.86) |
| Slough           | 1967        | 0.71<br>(0.58–0.85) |
| Slough           | 1968        | 0.74<br>(0.61–0.89) |
| Slough           | 1969        | 0.76<br>(0.62–0.92) |
| Slough           | 1970        | 0.8<br>(0.66–0.94)  |
| Slough           | 1971        | 0.82<br>(0.69–0.97) |
| Slough           | 1972        | 0.83<br>(0.7–0.97)  |
| Slough           | 1973        | 0.84<br>(0.72–0.97) |
| Slough           | 1974        | 0.86<br>(0.74–0.98) |
| Slough           | 1975        | 0.87<br>(0.75–0.99) |
| Slough           | 1976        | 0.84<br>(0.74–0.95) |
| Slough           | 1977        | 0.87<br>(0.77–0.98) |
| Slough           | 1978        | 0.92<br>(0.83–1.02) |
| Slough           | 1979        | 0.95<br>(0.86–1.05) |
| Slough           | 1980        | 0.94<br>(0.87–1.02) |
| Slough           | 1981        | 0.9<br>(0.84–0.97)  |
| Slough           | 1982        | 0.94<br>(0.88–1.01) |
| Slough           | 1983        | 0.95<br>(0.89–1.01) |
| Slough           | 1984        | 0.94<br>(0.88–0.99) |
| Slough           | 1985        | 0.98<br>(0.92–1.04) |
| Slough           | 1986        | 1.01<br>(0.94–1.06) |
| Slough           | 1987        | 1.06<br>(1.01–1.11) |
| Slough           | 1988        | 1.09<br>(1.02–1.15) |
| Slough           | 1989        | 1.06<br>(1.0–1.12)  |
| Slough           | 1990        | 1.04<br>(0.98–1.1)  |
| Slough           | 1991        | 0.99<br>(0.93–1.05) |



**Table 15 Ratio of adjusted to unadjusted 5q0 values for scaled locations by year**

| <b>Geography</b> | <b>Year</b> | <b>Ratio</b>        |
|------------------|-------------|---------------------|
| Slough           | 1992        | 0.91<br>(0.83–0.97) |
| Slough           | 1993        | 0.91<br>(0.85–0.97) |
| Slough           | 1994        | 0.9<br>(0.83–0.98)  |
| Slough           | 1995        | 0.96<br>(0.89–1.03) |
| Slough           | 1996        | 1.02<br>(0.95–1.09) |
| Slough           | 1997        | 0.99<br>(0.92–1.05) |
| Slough           | 1998        | 0.97<br>(0.9–1.04)  |
| Slough           | 1999        | 1.0<br>(0.93–1.08)  |
| Slough           | 2000        | 0.98<br>(0.89–1.09) |
| Slough           | 2001        | 0.98<br>(0.91–1.06) |
| Slough           | 2002        | 1.0<br>(0.93–1.08)  |
| Slough           | 2003        | 1.05<br>(0.96–1.15) |
| Slough           | 2004        | 1.0<br>(0.91–1.1)   |
| Slough           | 2005        | 1.01<br>(0.92–1.11) |
| Slough           | 2006        | 1.07<br>(0.97–1.16) |
| Slough           | 2007        | 1.07<br>(0.98–1.16) |
| Slough           | 2008        | 1.07<br>(0.98–1.17) |
| Slough           | 2009        | 1.03<br>(0.95–1.13) |
| Slough           | 2010        | 0.99<br>(0.92–1.07) |
| Slough           | 2011        | 0.99<br>(0.91–1.07) |
| Slough           | 2012        | 0.98<br>(0.91–1.06) |
| Slough           | 2013        | 0.97<br>(0.89–1.04) |
| Slough           | 2014        | 0.96<br>(0.88–1.05) |
| Slough           | 2015        | 0.97<br>(0.89–1.07) |
| Slough           | 2016        | 1.0<br>(0.91–1.08)  |
| Slough           | 2017        | 1.02<br>(0.88–1.17) |
| Southampton      | 1950        | 0.63<br>(0.52–0.75) |
| Southampton      | 1951        | 0.73<br>(0.6–0.89)  |
| Southampton      | 1952        | 0.69<br>(0.56–0.82) |
| Southampton      | 1953        | 0.69<br>(0.57–0.83) |
| Southampton      | 1954        | 0.66<br>(0.54–0.78) |

**Table 15 Ratio of adjusted to unadjusted 5q0 values for scaled locations by year**

| <b>Geography</b> | <b>Year</b> | <b>Ratio</b>        |
|------------------|-------------|---------------------|
| Southampton      | 1955        | 0.66<br>(0.55–0.78) |
| Southampton      | 1956        | 0.65<br>(0.54–0.77) |
| Southampton      | 1957        | 0.66<br>(0.56–0.78) |
| Southampton      | 1958        | 0.65<br>(0.55–0.77) |
| Southampton      | 1959        | 0.66<br>(0.55–0.77) |
| Southampton      | 1960        | 0.67<br>(0.57–0.8)  |
| Southampton      | 1961        | 0.69<br>(0.58–0.82) |
| Southampton      | 1962        | 0.71<br>(0.59–0.85) |
| Southampton      | 1963        | 0.72<br>(0.6–0.87)  |
| Southampton      | 1964        | 0.7<br>(0.58–0.84)  |
| Southampton      | 1965        | 0.69<br>(0.56–0.83) |
| Southampton      | 1966        | 0.72<br>(0.59–0.86) |
| Southampton      | 1967        | 0.71<br>(0.58–0.85) |
| Southampton      | 1968        | 0.74<br>(0.61–0.89) |
| Southampton      | 1969        | 0.76<br>(0.63–0.92) |
| Southampton      | 1970        | 0.8<br>(0.66–0.94)  |
| Southampton      | 1971        | 0.82<br>(0.69–0.97) |
| Southampton      | 1972        | 0.83<br>(0.7–0.97)  |
| Southampton      | 1973        | 0.84<br>(0.72–0.97) |
| Southampton      | 1974        | 0.86<br>(0.74–0.98) |
| Southampton      | 1975        | 0.87<br>(0.75–0.99) |
| Southampton      | 1976        | 0.84<br>(0.74–0.95) |
| Southampton      | 1977        | 0.87<br>(0.77–0.98) |
| Southampton      | 1978        | 0.92<br>(0.83–1.02) |
| Southampton      | 1979        | 0.95<br>(0.86–1.05) |
| Southampton      | 1980        | 0.94<br>(0.87–1.02) |
| Southampton      | 1981        | 0.9<br>(0.84–0.97)  |
| Southampton      | 1982        | 0.94<br>(0.88–1.01) |
| Southampton      | 1983        | 0.95<br>(0.89–1.01) |
| Southampton      | 1984        | 0.94<br>(0.88–0.99) |
| Southampton      | 1985        | 0.98<br>(0.92–1.04) |

**Table 15 Ratio of adjusted to unadjusted 5q0 values for scaled locations by year**

| <b>Geography</b> | <b>Year</b> | <b>Ratio</b>        |
|------------------|-------------|---------------------|
| Southampton      | 1986        | 1.01<br>(0.94–1.06) |
| Southampton      | 1987        | 1.06<br>(1.01–1.11) |
| Southampton      | 1988        | 1.09<br>(1.02–1.15) |
| Southampton      | 1989        | 1.06<br>(1.0–1.12)  |
| Southampton      | 1990        | 1.04<br>(0.98–1.1)  |
| Southampton      | 1991        | 0.99<br>(0.93–1.05) |
| Southampton      | 1992        | 0.91<br>(0.83–0.97) |
| Southampton      | 1993        | 0.91<br>(0.85–0.97) |
| Southampton      | 1994        | 0.9<br>(0.83–0.98)  |
| Southampton      | 1995        | 0.96<br>(0.89–1.03) |
| Southampton      | 1996        | 1.02<br>(0.95–1.09) |
| Southampton      | 1997        | 0.99<br>(0.92–1.05) |
| Southampton      | 1998        | 0.97<br>(0.9–1.04)  |
| Southampton      | 1999        | 1.0<br>(0.93–1.08)  |
| Southampton      | 2000        | 0.98<br>(0.89–1.09) |
| Southampton      | 2001        | 0.98<br>(0.91–1.06) |
| Southampton      | 2002        | 1.0<br>(0.93–1.08)  |
| Southampton      | 2003        | 1.05<br>(0.96–1.15) |
| Southampton      | 2004        | 1.0<br>(0.91–1.1)   |
| Southampton      | 2005        | 1.01<br>(0.92–1.11) |
| Southampton      | 2006        | 1.07<br>(0.97–1.16) |
| Southampton      | 2007        | 1.07<br>(0.98–1.16) |
| Southampton      | 2008        | 1.07<br>(0.98–1.17) |
| Southampton      | 2009        | 1.03<br>(0.95–1.13) |
| Southampton      | 2010        | 0.99<br>(0.92–1.07) |
| Southampton      | 2011        | 0.99<br>(0.91–1.07) |
| Southampton      | 2012        | 0.98<br>(0.91–1.06) |
| Southampton      | 2013        | 0.97<br>(0.89–1.04) |
| Southampton      | 2014        | 0.96<br>(0.88–1.05) |
| Southampton      | 2015        | 0.97<br>(0.89–1.07) |
| Southampton      | 2016        | 1.0<br>(0.91–1.08)  |

**Table 15 Ratio of adjusted to unadjusted 5q0 values for scaled locations by year**

| <b>Geography</b> | <b>Year</b> | <b>Ratio</b>        |
|------------------|-------------|---------------------|
| Southampton      | 2017        | 1.02<br>(0.88–1.17) |
| Surrey           | 1950        | 0.63<br>(0.52–0.75) |
| Surrey           | 1951        | 0.73<br>(0.6–0.89)  |
| Surrey           | 1952        | 0.69<br>(0.56–0.82) |
| Surrey           | 1953        | 0.69<br>(0.57–0.83) |
| Surrey           | 1954        | 0.65<br>(0.54–0.78) |
| Surrey           | 1955        | 0.66<br>(0.55–0.78) |
| Surrey           | 1956        | 0.65<br>(0.54–0.77) |
| Surrey           | 1957        | 0.66<br>(0.55–0.78) |
| Surrey           | 1958        | 0.65<br>(0.55–0.77) |
| Surrey           | 1959        | 0.66<br>(0.55–0.77) |
| Surrey           | 1960        | 0.67<br>(0.57–0.8)  |
| Surrey           | 1961        | 0.69<br>(0.58–0.82) |
| Surrey           | 1962        | 0.71<br>(0.59–0.85) |
| Surrey           | 1963        | 0.72<br>(0.59–0.87) |
| Surrey           | 1964        | 0.7<br>(0.58–0.84)  |
| Surrey           | 1965        | 0.69<br>(0.56–0.83) |
| Surrey           | 1966        | 0.72<br>(0.58–0.86) |
| Surrey           | 1967        | 0.71<br>(0.58–0.85) |
| Surrey           | 1968        | 0.74<br>(0.61–0.89) |
| Surrey           | 1969        | 0.76<br>(0.62–0.92) |
| Surrey           | 1970        | 0.79<br>(0.65–0.94) |
| Surrey           | 1971        | 0.82<br>(0.69–0.97) |
| Surrey           | 1972        | 0.83<br>(0.7–0.97)  |
| Surrey           | 1973        | 0.84<br>(0.72–0.97) |
| Surrey           | 1974        | 0.86<br>(0.74–0.98) |
| Surrey           | 1975        | 0.87<br>(0.75–0.99) |
| Surrey           | 1976        | 0.84<br>(0.74–0.95) |
| Surrey           | 1977        | 0.87<br>(0.77–0.98) |
| Surrey           | 1978        | 0.92<br>(0.83–1.02) |
| Surrey           | 1979        | 0.95<br>(0.86–1.05) |

**Table 15 Ratio of adjusted to unadjusted 5q0 values for scaled locations by year**

| <b>Geography</b> | <b>Year</b> | <b>Ratio</b>        |
|------------------|-------------|---------------------|
| Surrey           | 1980        | 0.94<br>(0.87–1.02) |
| Surrey           | 1981        | 0.9<br>(0.84–0.97)  |
| Surrey           | 1982        | 0.94<br>(0.88–1.01) |
| Surrey           | 1983        | 0.95<br>(0.89–1.01) |
| Surrey           | 1984        | 0.94<br>(0.88–0.99) |
| Surrey           | 1985        | 0.98<br>(0.92–1.04) |
| Surrey           | 1986        | 1.01<br>(0.94–1.06) |
| Surrey           | 1987        | 1.06<br>(1.01–1.11) |
| Surrey           | 1988        | 1.09<br>(1.02–1.15) |
| Surrey           | 1989        | 1.06<br>(1.0–1.12)  |
| Surrey           | 1990        | 1.04<br>(0.98–1.1)  |
| Surrey           | 1991        | 0.99<br>(0.93–1.05) |
| Surrey           | 1992        | 0.91<br>(0.83–0.97) |
| Surrey           | 1993        | 0.91<br>(0.85–0.97) |
| Surrey           | 1994        | 0.9<br>(0.83–0.98)  |
| Surrey           | 1995        | 0.96<br>(0.89–1.03) |
| Surrey           | 1996        | 1.02<br>(0.95–1.09) |
| Surrey           | 1997        | 0.99<br>(0.92–1.05) |
| Surrey           | 1998        | 0.97<br>(0.9–1.04)  |
| Surrey           | 1999        | 1.0<br>(0.93–1.08)  |
| Surrey           | 2000        | 0.98<br>(0.89–1.09) |
| Surrey           | 2001        | 0.98<br>(0.91–1.06) |
| Surrey           | 2002        | 1.0<br>(0.93–1.08)  |
| Surrey           | 2003        | 1.05<br>(0.96–1.15) |
| Surrey           | 2004        | 1.0<br>(0.91–1.1)   |
| Surrey           | 2005        | 1.01<br>(0.92–1.11) |
| Surrey           | 2006        | 1.07<br>(0.97–1.16) |
| Surrey           | 2007        | 1.07<br>(0.98–1.16) |
| Surrey           | 2008        | 1.07<br>(0.98–1.17) |
| Surrey           | 2009        | 1.03<br>(0.95–1.13) |
| Surrey           | 2010        | 0.99<br>(0.92–1.07) |

**Table 15 Ratio of adjusted to unadjusted 5q0 values for scaled locations by year**

| <b>Geography</b> | <b>Year</b> | <b>Ratio</b>        |
|------------------|-------------|---------------------|
| Surrey           | 2011        | 0.99<br>(0.91–1.07) |
| Surrey           | 2012        | 0.98<br>(0.91–1.06) |
| Surrey           | 2013        | 0.97<br>(0.89–1.04) |
| Surrey           | 2014        | 0.96<br>(0.88–1.05) |
| Surrey           | 2015        | 0.97<br>(0.89–1.07) |
| Surrey           | 2016        | 1.0<br>(0.91–1.08)  |
| Surrey           | 2017        | 1.02<br>(0.88–1.17) |
| West Berkshire   | 1950        | 0.63<br>(0.52–0.75) |
| West Berkshire   | 1951        | 0.73<br>(0.6–0.88)  |
| West Berkshire   | 1952        | 0.69<br>(0.56–0.82) |
| West Berkshire   | 1953        | 0.69<br>(0.57–0.83) |
| West Berkshire   | 1954        | 0.65<br>(0.54–0.78) |
| West Berkshire   | 1955        | 0.66<br>(0.55–0.78) |
| West Berkshire   | 1956        | 0.65<br>(0.54–0.77) |
| West Berkshire   | 1957        | 0.66<br>(0.55–0.78) |
| West Berkshire   | 1958        | 0.65<br>(0.55–0.77) |
| West Berkshire   | 1959        | 0.66<br>(0.55–0.77) |
| West Berkshire   | 1960        | 0.67<br>(0.56–0.79) |
| West Berkshire   | 1961        | 0.69<br>(0.57–0.82) |
| West Berkshire   | 1962        | 0.71<br>(0.59–0.85) |
| West Berkshire   | 1963        | 0.72<br>(0.59–0.87) |
| West Berkshire   | 1964        | 0.7<br>(0.58–0.84)  |
| West Berkshire   | 1965        | 0.69<br>(0.56–0.83) |
| West Berkshire   | 1966        | 0.72<br>(0.58–0.86) |
| West Berkshire   | 1967        | 0.71<br>(0.58–0.85) |
| West Berkshire   | 1968        | 0.74<br>(0.61–0.89) |
| West Berkshire   | 1969        | 0.76<br>(0.62–0.92) |
| West Berkshire   | 1970        | 0.79<br>(0.65–0.94) |
| West Berkshire   | 1971        | 0.82<br>(0.69–0.97) |
| West Berkshire   | 1972        | 0.83<br>(0.7–0.97)  |
| West Berkshire   | 1973        | 0.84<br>(0.72–0.97) |

**Table 15 Ratio of adjusted to unadjusted 5q0 values for scaled locations by year**

| <b>Geography</b> | <b>Year</b> | <b>Ratio</b>        |
|------------------|-------------|---------------------|
| West Berkshire   | 1974        | 0.86<br>(0.74–0.98) |
| West Berkshire   | 1975        | 0.87<br>(0.75–0.99) |
| West Berkshire   | 1976        | 0.84<br>(0.74–0.95) |
| West Berkshire   | 1977        | 0.87<br>(0.77–0.98) |
| West Berkshire   | 1978        | 0.92<br>(0.83–1.02) |
| West Berkshire   | 1979        | 0.95<br>(0.86–1.05) |
| West Berkshire   | 1980        | 0.94<br>(0.87–1.02) |
| West Berkshire   | 1981        | 0.9<br>(0.84–0.97)  |
| West Berkshire   | 1982        | 0.94<br>(0.88–1.01) |
| West Berkshire   | 1983        | 0.95<br>(0.89–1.01) |
| West Berkshire   | 1984        | 0.94<br>(0.88–0.99) |
| West Berkshire   | 1985        | 0.98<br>(0.92–1.04) |
| West Berkshire   | 1986        | 1.01<br>(0.94–1.07) |
| West Berkshire   | 1987        | 1.06<br>(1.01–1.11) |
| West Berkshire   | 1988        | 1.09<br>(1.02–1.15) |
| West Berkshire   | 1989        | 1.06<br>(1.0–1.12)  |
| West Berkshire   | 1990        | 1.04<br>(0.98–1.1)  |
| West Berkshire   | 1991        | 0.99<br>(0.93–1.05) |
| West Berkshire   | 1992        | 0.91<br>(0.83–0.97) |
| West Berkshire   | 1993        | 0.91<br>(0.85–0.97) |
| West Berkshire   | 1994        | 0.9<br>(0.83–0.98)  |
| West Berkshire   | 1995        | 0.96<br>(0.89–1.03) |
| West Berkshire   | 1996        | 1.02<br>(0.95–1.09) |
| West Berkshire   | 1997        | 0.99<br>(0.92–1.05) |
| West Berkshire   | 1998        | 0.97<br>(0.9–1.04)  |
| West Berkshire   | 1999        | 1.0<br>(0.93–1.08)  |
| West Berkshire   | 2000        | 0.98<br>(0.89–1.09) |
| West Berkshire   | 2001        | 0.98<br>(0.91–1.06) |
| West Berkshire   | 2002        | 1.0<br>(0.93–1.08)  |
| West Berkshire   | 2003        | 1.05<br>(0.96–1.15) |
| West Berkshire   | 2004        | 1.0<br>(0.91–1.1)   |

**Table 15 Ratio of adjusted to unadjusted 5q0 values for scaled locations by year**

| <b>Geography</b> | <b>Year</b> | <b>Ratio</b>        |
|------------------|-------------|---------------------|
| West Berkshire   | 2005        | 1.01<br>(0.92–1.11) |
| West Berkshire   | 2006        | 1.07<br>(0.97–1.16) |
| West Berkshire   | 2007        | 1.07<br>(0.98–1.16) |
| West Berkshire   | 2008        | 1.07<br>(0.98–1.17) |
| West Berkshire   | 2009        | 1.03<br>(0.95–1.13) |
| West Berkshire   | 2010        | 0.99<br>(0.92–1.07) |
| West Berkshire   | 2011        | 0.99<br>(0.91–1.07) |
| West Berkshire   | 2012        | 0.98<br>(0.91–1.06) |
| West Berkshire   | 2013        | 0.97<br>(0.89–1.04) |
| West Berkshire   | 2014        | 0.96<br>(0.88–1.05) |
| West Berkshire   | 2015        | 0.97<br>(0.89–1.07) |
| West Berkshire   | 2016        | 1.0<br>(0.91–1.08)  |
| West Berkshire   | 2017        | 1.02<br>(0.88–1.17) |
| West Sussex      | 1950        | 0.63<br>(0.52–0.75) |
| West Sussex      | 1951        | 0.73<br>(0.6–0.88)  |
| West Sussex      | 1952        | 0.69<br>(0.56–0.82) |
| West Sussex      | 1953        | 0.69<br>(0.57–0.83) |
| West Sussex      | 1954        | 0.65<br>(0.54–0.78) |
| West Sussex      | 1955        | 0.66<br>(0.55–0.78) |
| West Sussex      | 1956        | 0.65<br>(0.54–0.77) |
| West Sussex      | 1957        | 0.66<br>(0.55–0.78) |
| West Sussex      | 1958        | 0.65<br>(0.55–0.77) |
| West Sussex      | 1959        | 0.66<br>(0.55–0.77) |
| West Sussex      | 1960        | 0.67<br>(0.57–0.8)  |
| West Sussex      | 1961        | 0.69<br>(0.58–0.82) |
| West Sussex      | 1962        | 0.71<br>(0.59–0.85) |
| West Sussex      | 1963        | 0.72<br>(0.59–0.87) |
| West Sussex      | 1964        | 0.7<br>(0.58–0.84)  |
| West Sussex      | 1965        | 0.69<br>(0.56–0.83) |
| West Sussex      | 1966        | 0.72<br>(0.58–0.86) |
| West Sussex      | 1967        | 0.71<br>(0.58–0.85) |



**Table 15 Ratio of adjusted to unadjusted 5q0 values for scaled locations by year**

| <b>Geography</b> | <b>Year</b> | <b>Ratio</b>        |
|------------------|-------------|---------------------|
| West Sussex      | 1968        | 0.74<br>(0.61–0.89) |
| West Sussex      | 1969        | 0.76<br>(0.62–0.92) |
| West Sussex      | 1970        | 0.79<br>(0.65–0.94) |
| West Sussex      | 1971        | 0.82<br>(0.69–0.97) |
| West Sussex      | 1972        | 0.83<br>(0.7–0.97)  |
| West Sussex      | 1973        | 0.84<br>(0.72–0.97) |
| West Sussex      | 1974        | 0.86<br>(0.74–0.98) |
| West Sussex      | 1975        | 0.87<br>(0.75–0.99) |
| West Sussex      | 1976        | 0.84<br>(0.74–0.95) |
| West Sussex      | 1977        | 0.87<br>(0.77–0.98) |
| West Sussex      | 1978        | 0.92<br>(0.83–1.02) |
| West Sussex      | 1979        | 0.95<br>(0.86–1.05) |
| West Sussex      | 1980        | 0.94<br>(0.87–1.02) |
| West Sussex      | 1981        | 0.9<br>(0.84–0.97)  |
| West Sussex      | 1982        | 0.94<br>(0.88–1.01) |
| West Sussex      | 1983        | 0.95<br>(0.89–1.01) |
| West Sussex      | 1984        | 0.94<br>(0.88–0.99) |
| West Sussex      | 1985        | 0.98<br>(0.92–1.04) |
| West Sussex      | 1986        | 1.01<br>(0.94–1.07) |
| West Sussex      | 1987        | 1.06<br>(1.01–1.11) |
| West Sussex      | 1988        | 1.09<br>(1.02–1.15) |
| West Sussex      | 1989        | 1.06<br>(1.0–1.12)  |
| West Sussex      | 1990        | 1.04<br>(0.98–1.1)  |
| West Sussex      | 1991        | 0.99<br>(0.93–1.05) |
| West Sussex      | 1992        | 0.91<br>(0.83–0.97) |
| West Sussex      | 1993        | 0.91<br>(0.85–0.97) |
| West Sussex      | 1994        | 0.9<br>(0.83–0.98)  |
| West Sussex      | 1995        | 0.96<br>(0.89–1.03) |
| West Sussex      | 1996        | 1.02<br>(0.95–1.09) |
| West Sussex      | 1997        | 0.99<br>(0.92–1.05) |
| West Sussex      | 1998        | 0.97<br>(0.9–1.04)  |

**Table 15 Ratio of adjusted to unadjusted 5q0 values for scaled locations by year**

| <b>Geography</b>       | <b>Year</b> | <b>Ratio</b>        |
|------------------------|-------------|---------------------|
| West Sussex            | 1999        | 1.0<br>(0.93–1.08)  |
| West Sussex            | 2000        | 0.98<br>(0.89–1.09) |
| West Sussex            | 2001        | 0.98<br>(0.91–1.06) |
| West Sussex            | 2002        | 1.0<br>(0.93–1.08)  |
| West Sussex            | 2003        | 1.05<br>(0.96–1.15) |
| West Sussex            | 2004        | 1.0<br>(0.91–1.1)   |
| West Sussex            | 2005        | 1.01<br>(0.92–1.11) |
| West Sussex            | 2006        | 1.07<br>(0.97–1.16) |
| West Sussex            | 2007        | 1.07<br>(0.98–1.16) |
| West Sussex            | 2008        | 1.07<br>(0.98–1.17) |
| West Sussex            | 2009        | 1.03<br>(0.95–1.13) |
| West Sussex            | 2010        | 0.99<br>(0.92–1.07) |
| West Sussex            | 2011        | 0.99<br>(0.91–1.07) |
| West Sussex            | 2012        | 0.98<br>(0.91–1.06) |
| West Sussex            | 2013        | 0.97<br>(0.89–1.04) |
| West Sussex            | 2014        | 0.96<br>(0.88–1.05) |
| West Sussex            | 2015        | 0.97<br>(0.89–1.07) |
| West Sussex            | 2016        | 1.0<br>(0.91–1.08)  |
| West Sussex            | 2017        | 1.02<br>(0.88–1.17) |
| Windsor and Maidenhead | 1950        | 0.63<br>(0.52–0.75) |
| Windsor and Maidenhead | 1951        | 0.73<br>(0.6–0.88)  |
| Windsor and Maidenhead | 1952        | 0.69<br>(0.56–0.82) |
| Windsor and Maidenhead | 1953        | 0.69<br>(0.57–0.83) |
| Windsor and Maidenhead | 1954        | 0.65<br>(0.54–0.78) |
| Windsor and Maidenhead | 1955        | 0.66<br>(0.55–0.78) |
| Windsor and Maidenhead | 1956        | 0.65<br>(0.54–0.77) |
| Windsor and Maidenhead | 1957        | 0.66<br>(0.55–0.78) |
| Windsor and Maidenhead | 1958        | 0.65<br>(0.55–0.77) |
| Windsor and Maidenhead | 1959        | 0.66<br>(0.55–0.77) |
| Windsor and Maidenhead | 1960        | 0.67<br>(0.56–0.79) |
| Windsor and Maidenhead | 1961        | 0.69<br>(0.58–0.82) |

**Table 15 Ratio of adjusted to unadjusted 5q0 values for scaled locations by year**

| <b>Geography</b>       | <b>Year</b> | <b>Ratio</b>        |
|------------------------|-------------|---------------------|
| Windsor and Maidenhead | 1962        | 0.71<br>(0.59–0.85) |
| Windsor and Maidenhead | 1963        | 0.72<br>(0.59–0.87) |
| Windsor and Maidenhead | 1964        | 0.7<br>(0.58–0.84)  |
| Windsor and Maidenhead | 1965        | 0.69<br>(0.56–0.83) |
| Windsor and Maidenhead | 1966        | 0.72<br>(0.58–0.86) |
| Windsor and Maidenhead | 1967        | 0.71<br>(0.58–0.85) |
| Windsor and Maidenhead | 1968        | 0.74<br>(0.61–0.89) |
| Windsor and Maidenhead | 1969        | 0.76<br>(0.62–0.92) |
| Windsor and Maidenhead | 1970        | 0.79<br>(0.65–0.94) |
| Windsor and Maidenhead | 1971        | 0.82<br>(0.69–0.97) |
| Windsor and Maidenhead | 1972        | 0.83<br>(0.7–0.97)  |
| Windsor and Maidenhead | 1973        | 0.84<br>(0.72–0.97) |
| Windsor and Maidenhead | 1974        | 0.86<br>(0.74–0.98) |
| Windsor and Maidenhead | 1975        | 0.87<br>(0.75–0.99) |
| Windsor and Maidenhead | 1976        | 0.84<br>(0.74–0.95) |
| Windsor and Maidenhead | 1977        | 0.87<br>(0.77–0.98) |
| Windsor and Maidenhead | 1978        | 0.92<br>(0.83–1.02) |
| Windsor and Maidenhead | 1979        | 0.95<br>(0.86–1.05) |
| Windsor and Maidenhead | 1980        | 0.94<br>(0.87–1.02) |
| Windsor and Maidenhead | 1981        | 0.9<br>(0.84–0.97)  |
| Windsor and Maidenhead | 1982        | 0.94<br>(0.88–1.01) |
| Windsor and Maidenhead | 1983        | 0.95<br>(0.89–1.01) |
| Windsor and Maidenhead | 1984        | 0.94<br>(0.88–0.99) |
| Windsor and Maidenhead | 1985        | 0.98<br>(0.92–1.04) |
| Windsor and Maidenhead | 1986        | 1.01<br>(0.94–1.07) |
| Windsor and Maidenhead | 1987        | 1.06<br>(1.01–1.11) |
| Windsor and Maidenhead | 1988        | 1.09<br>(1.02–1.15) |
| Windsor and Maidenhead | 1989        | 1.06<br>(1.0–1.12)  |
| Windsor and Maidenhead | 1990        | 1.04<br>(0.98–1.1)  |
| Windsor and Maidenhead | 1991        | 0.99<br>(0.93–1.05) |
| Windsor and Maidenhead | 1992        | 0.91<br>(0.83–0.97) |

**Table 15 Ratio of adjusted to unadjusted 5q0 values for scaled locations by year**

| <b>Geography</b>       | <b>Year</b> | <b>Ratio</b>        |
|------------------------|-------------|---------------------|
| Windsor and Maidenhead | 1993        | 0.91<br>(0.85–0.97) |
| Windsor and Maidenhead | 1994        | 0.9<br>(0.83–0.98)  |
| Windsor and Maidenhead | 1995        | 0.96<br>(0.89–1.03) |
| Windsor and Maidenhead | 1996        | 1.02<br>(0.95–1.09) |
| Windsor and Maidenhead | 1997        | 0.99<br>(0.92–1.05) |
| Windsor and Maidenhead | 1998        | 0.97<br>(0.9–1.04)  |
| Windsor and Maidenhead | 1999        | 1.0<br>(0.93–1.08)  |
| Windsor and Maidenhead | 2000        | 0.98<br>(0.89–1.09) |
| Windsor and Maidenhead | 2001        | 0.98<br>(0.91–1.06) |
| Windsor and Maidenhead | 2002        | 1.0<br>(0.93–1.08)  |
| Windsor and Maidenhead | 2003        | 1.05<br>(0.96–1.15) |
| Windsor and Maidenhead | 2004        | 1.0<br>(0.91–1.1)   |
| Windsor and Maidenhead | 2005        | 1.01<br>(0.92–1.11) |
| Windsor and Maidenhead | 2006        | 1.07<br>(0.97–1.16) |
| Windsor and Maidenhead | 2007        | 1.07<br>(0.98–1.16) |
| Windsor and Maidenhead | 2008        | 1.07<br>(0.98–1.17) |
| Windsor and Maidenhead | 2009        | 1.03<br>(0.95–1.13) |
| Windsor and Maidenhead | 2010        | 0.99<br>(0.92–1.07) |
| Windsor and Maidenhead | 2011        | 0.99<br>(0.91–1.07) |
| Windsor and Maidenhead | 2012        | 0.98<br>(0.91–1.06) |
| Windsor and Maidenhead | 2013        | 0.97<br>(0.89–1.04) |
| Windsor and Maidenhead | 2014        | 0.96<br>(0.88–1.05) |
| Windsor and Maidenhead | 2015        | 0.97<br>(0.89–1.07) |
| Windsor and Maidenhead | 2016        | 1.0<br>(0.91–1.08)  |
| Windsor and Maidenhead | 2017        | 1.02<br>(0.88–1.17) |
| Wokingham              | 1950        | 0.63<br>(0.52–0.75) |
| Wokingham              | 1951        | 0.73<br>(0.6–0.88)  |
| Wokingham              | 1952        | 0.69<br>(0.56–0.82) |
| Wokingham              | 1953        | 0.69<br>(0.57–0.83) |
| Wokingham              | 1954        | 0.65<br>(0.54–0.78) |
| Wokingham              | 1955        | 0.66<br>(0.55–0.78) |

**Table 15 Ratio of adjusted to unadjusted 5q0 values for scaled locations by year**

| <b>Geography</b> | <b>Year</b> | <b>Ratio</b>        |
|------------------|-------------|---------------------|
| Wokingham        | 1956        | 0.65<br>(0.54–0.77) |
| Wokingham        | 1957        | 0.66<br>(0.55–0.78) |
| Wokingham        | 1958        | 0.65<br>(0.55–0.77) |
| Wokingham        | 1959        | 0.66<br>(0.55–0.77) |
| Wokingham        | 1960        | 0.67<br>(0.56–0.79) |
| Wokingham        | 1961        | 0.69<br>(0.57–0.82) |
| Wokingham        | 1962        | 0.71<br>(0.59–0.85) |
| Wokingham        | 1963        | 0.72<br>(0.59–0.87) |
| Wokingham        | 1964        | 0.7<br>(0.58–0.84)  |
| Wokingham        | 1965        | 0.69<br>(0.56–0.83) |
| Wokingham        | 1966        | 0.72<br>(0.58–0.86) |
| Wokingham        | 1967        | 0.71<br>(0.58–0.85) |
| Wokingham        | 1968        | 0.74<br>(0.61–0.89) |
| Wokingham        | 1969        | 0.76<br>(0.62–0.92) |
| Wokingham        | 1970        | 0.79<br>(0.65–0.94) |
| Wokingham        | 1971        | 0.82<br>(0.69–0.97) |
| Wokingham        | 1972        | 0.83<br>(0.7–0.97)  |
| Wokingham        | 1973        | 0.84<br>(0.72–0.97) |
| Wokingham        | 1974        | 0.86<br>(0.74–0.98) |
| Wokingham        | 1975        | 0.87<br>(0.75–0.99) |
| Wokingham        | 1976        | 0.84<br>(0.74–0.95) |
| Wokingham        | 1977        | 0.87<br>(0.77–0.98) |
| Wokingham        | 1978        | 0.92<br>(0.83–1.02) |
| Wokingham        | 1979        | 0.95<br>(0.86–1.05) |
| Wokingham        | 1980        | 0.94<br>(0.87–1.02) |
| Wokingham        | 1981        | 0.9<br>(0.84–0.97)  |
| Wokingham        | 1982        | 0.94<br>(0.88–1.01) |
| Wokingham        | 1983        | 0.95<br>(0.89–1.01) |
| Wokingham        | 1984        | 0.94<br>(0.88–0.99) |
| Wokingham        | 1985        | 0.98<br>(0.92–1.04) |
| Wokingham        | 1986        | 1.01<br>(0.94–1.07) |

**Table 15 Ratio of adjusted to unadjusted 5q0 values for scaled locations by year**

| <b>Geography</b> | <b>Year</b> | <b>Ratio</b>        |
|------------------|-------------|---------------------|
| Wokingham        | 1987        | 1.06<br>(1.01–1.11) |
| Wokingham        | 1988        | 1.09<br>(1.02–1.15) |
| Wokingham        | 1989        | 1.06<br>(1.0–1.12)  |
| Wokingham        | 1990        | 1.04<br>(0.98–1.1)  |
| Wokingham        | 1991        | 0.99<br>(0.93–1.05) |
| Wokingham        | 1992        | 0.91<br>(0.83–0.97) |
| Wokingham        | 1993        | 0.91<br>(0.85–0.97) |
| Wokingham        | 1994        | 0.9<br>(0.83–0.98)  |
| Wokingham        | 1995        | 0.96<br>(0.89–1.03) |
| Wokingham        | 1996        | 1.02<br>(0.95–1.09) |
| Wokingham        | 1997        | 0.99<br>(0.92–1.05) |
| Wokingham        | 1998        | 0.97<br>(0.9–1.04)  |
| Wokingham        | 1999        | 1.0<br>(0.93–1.08)  |
| Wokingham        | 2000        | 0.98<br>(0.89–1.09) |
| Wokingham        | 2001        | 0.98<br>(0.91–1.06) |
| Wokingham        | 2002        | 1.0<br>(0.93–1.08)  |
| Wokingham        | 2003        | 1.05<br>(0.96–1.15) |
| Wokingham        | 2004        | 1.0<br>(0.91–1.1)   |
| Wokingham        | 2005        | 1.01<br>(0.92–1.11) |
| Wokingham        | 2006        | 1.07<br>(0.97–1.16) |
| Wokingham        | 2007        | 1.07<br>(0.98–1.16) |
| Wokingham        | 2008        | 1.07<br>(0.98–1.17) |
| Wokingham        | 2009        | 1.03<br>(0.95–1.13) |
| Wokingham        | 2010        | 0.99<br>(0.92–1.07) |
| Wokingham        | 2011        | 0.99<br>(0.91–1.07) |
| Wokingham        | 2012        | 0.98<br>(0.91–1.06) |
| Wokingham        | 2013        | 0.97<br>(0.89–1.04) |
| Wokingham        | 2014        | 0.96<br>(0.88–1.05) |
| Wokingham        | 2015        | 0.97<br>(0.89–1.07) |
| Wokingham        | 2016        | 1.0<br>(0.91–1.08)  |
| Wokingham        | 2017        | 1.02<br>(0.88–1.17) |

**Table 15 Ratio of adjusted to unadjusted 5q0 values for scaled locations by year**

| <b>Geography</b>   | <b>Year</b> | <b>Ratio</b>        |
|--------------------|-------------|---------------------|
| South West England | 1950        | 0.9<br>(0.74–1.08)  |
| South West England | 1951        | 1.04<br>(0.85–1.25) |
| South West England | 1952        | 0.97<br>(0.8–1.17)  |
| South West England | 1953        | 0.98<br>(0.81–1.17) |
| South West England | 1954        | 0.91<br>(0.75–1.1)  |
| South West England | 1955        | 0.91<br>(0.74–1.11) |
| South West England | 1956        | 0.89<br>(0.73–1.09) |
| South West England | 1957        | 0.9<br>(0.73–1.1)   |
| South West England | 1958        | 0.88<br>(0.71–1.07) |
| South West England | 1959        | 0.87<br>(0.71–1.06) |
| South West England | 1960        | 0.88<br>(0.71–1.06) |
| South West England | 1961        | 0.89<br>(0.72–1.07) |
| South West England | 1962        | 0.91<br>(0.74–1.09) |
| South West England | 1963        | 0.91<br>(0.75–1.09) |
| South West England | 1964        | 0.88<br>(0.72–1.05) |
| South West England | 1965        | 0.85<br>(0.69–1.02) |
| South West England | 1966        | 0.87<br>(0.71–1.04) |
| South West England | 1967        | 0.85<br>(0.69–1.02) |
| South West England | 1968        | 0.88<br>(0.72–1.05) |
| South West England | 1969        | 0.89<br>(0.73–1.06) |
| South West England | 1970        | 0.91<br>(0.76–1.08) |
| South West England | 1971        | 0.93<br>(0.78–1.1)  |
| South West England | 1972        | 0.93<br>(0.78–1.11) |
| South West England | 1973        | 0.93<br>(0.78–1.12) |
| South West England | 1974        | 0.94<br>(0.79–1.11) |
| South West England | 1975        | 0.93<br>(0.79–1.1)  |
| South West England | 1976        | 0.9<br>(0.77–1.04)  |
| South West England | 1977        | 0.92<br>(0.8–1.04)  |
| South West England | 1978        | 0.96<br>(0.85–1.08) |
| South West England | 1979        | 0.98<br>(0.9–1.08)  |
| South West England | 1980        | 0.97<br>(0.9–1.04)  |

**Table 15 Ratio of adjusted to unadjusted 5q0 values for scaled locations by year**

| <b>Geography</b>   | <b>Year</b> | <b>Ratio</b>        |
|--------------------|-------------|---------------------|
| South West England | 1981        | 0.93<br>(0.89–0.97) |
| South West England | 1982        | 0.98<br>(0.95–1.01) |
| South West England | 1983        | 1.0<br>(0.97–1.03)  |
| South West England | 1984        | 0.98<br>(0.95–1.01) |
| South West England | 1985        | 0.99<br>(0.95–1.02) |
| South West England | 1986        | 0.99<br>(0.97–1.02) |
| South West England | 1987        | 0.99<br>(0.96–1.01) |
| South West England | 1988        | 1.0<br>(0.97–1.03)  |
| South West England | 1989        | 0.99<br>(0.97–1.01) |
| South West England | 1990        | 1.0<br>(0.98–1.02)  |
| South West England | 1991        | 1.0<br>(0.98–1.02)  |
| South West England | 1992        | 0.97<br>(0.95–1.0)  |
| South West England | 1993        | 1.0<br>(0.97–1.02)  |
| South West England | 1994        | 1.01<br>(0.98–1.04) |
| South West England | 1995        | 1.02<br>(0.99–1.05) |
| South West England | 1996        | 1.04<br>(1.01–1.06) |
| South West England | 1997        | 1.01<br>(0.97–1.05) |
| South West England | 1998        | 1.0<br>(0.96–1.03)  |
| South West England | 1999        | 1.02<br>(0.99–1.06) |
| South West England | 2000        | 1.01<br>(0.95–1.09) |
| South West England | 2001        | 1.0<br>(0.96–1.04)  |
| South West England | 2002        | 0.98<br>(0.95–1.02) |
| South West England | 2003        | 1.02<br>(0.98–1.06) |
| South West England | 2004        | 0.99<br>(0.96–1.02) |
| South West England | 2005        | 0.99<br>(0.95–1.03) |
| South West England | 2006        | 1.01<br>(0.97–1.05) |
| South West England | 2007        | 1.01<br>(0.98–1.05) |
| South West England | 2008        | 1.01<br>(0.98–1.04) |
| South West England | 2009        | 1.0<br>(0.96–1.04)  |
| South West England | 2010        | 0.98<br>(0.95–1.02) |
| South West England | 2011        | 1.0<br>(0.96–1.04)  |



**Table 15 Ratio of adjusted to unadjusted 5q0 values for scaled locations by year**

| <b>Geography</b>             | <b>Year</b> | <b>Ratio</b>        |
|------------------------------|-------------|---------------------|
| South West England           | 2012        | 1.0<br>(0.96–1.04)  |
| South West England           | 2013        | 0.99<br>(0.95–1.02) |
| South West England           | 2014        | 0.99<br>(0.95–1.03) |
| South West England           | 2015        | 1.0<br>(0.96–1.04)  |
| South West England           | 2016        | 1.0<br>(0.94–1.05)  |
| South West England           | 2017        | 1.02<br>(0.92–1.14) |
| Bath and North East Somerset | 1950        | 0.7<br>(0.58–0.84)  |
| Bath and North East Somerset | 1951        | 0.81<br>(0.67–0.97) |
| Bath and North East Somerset | 1952        | 0.76<br>(0.63–0.91) |
| Bath and North East Somerset | 1953        | 0.77<br>(0.63–0.92) |
| Bath and North East Somerset | 1954        | 0.72<br>(0.6–0.87)  |
| Bath and North East Somerset | 1955        | 0.72<br>(0.6–0.86)  |
| Bath and North East Somerset | 1956        | 0.71<br>(0.6–0.84)  |
| Bath and North East Somerset | 1957        | 0.72<br>(0.61–0.84) |
| Bath and North East Somerset | 1958        | 0.71<br>(0.61–0.81) |
| Bath and North East Somerset | 1959        | 0.71<br>(0.61–0.82) |
| Bath and North East Somerset | 1960        | 0.72<br>(0.62–0.85) |
| Bath and North East Somerset | 1961        | 0.74<br>(0.62–0.87) |
| Bath and North East Somerset | 1962        | 0.76<br>(0.64–0.91) |
| Bath and North East Somerset | 1963        | 0.77<br>(0.63–0.91) |
| Bath and North East Somerset | 1964        | 0.75<br>(0.61–0.89) |
| Bath and North East Somerset | 1965        | 0.73<br>(0.6–0.87)  |
| Bath and North East Somerset | 1966        | 0.76<br>(0.62–0.9)  |
| Bath and North East Somerset | 1967        | 0.75<br>(0.6–0.9)   |
| Bath and North East Somerset | 1968        | 0.78<br>(0.63–0.95) |
| Bath and North East Somerset | 1969        | 0.8<br>(0.65–0.97)  |
| Bath and North East Somerset | 1970        | 0.83<br>(0.68–1.0)  |
| Bath and North East Somerset | 1971        | 0.86<br>(0.72–1.02) |
| Bath and North East Somerset | 1972        | 0.86<br>(0.73–1.02) |
| Bath and North East Somerset | 1973        | 0.87<br>(0.75–1.01) |
| Bath and North East Somerset | 1974        | 0.88<br>(0.77–1.01) |

**Table 15 Ratio of adjusted to unadjusted 5q0 values for scaled locations by year**

| <b>Geography</b>             | <b>Year</b> | <b>Ratio</b>        |
|------------------------------|-------------|---------------------|
| Bath and North East Somerset | 1975        | 0.89<br>(0.76–1.02) |
| Bath and North East Somerset | 1976        | 0.86<br>(0.73–1.0)  |
| Bath and North East Somerset | 1977        | 0.88<br>(0.75–1.03) |
| Bath and North East Somerset | 1978        | 0.93<br>(0.79–1.09) |
| Bath and North East Somerset | 1979        | 0.95<br>(0.83–1.09) |
| Bath and North East Somerset | 1980        | 0.94<br>(0.85–1.04) |
| Bath and North East Somerset | 1981        | 0.9<br>(0.82–0.98)  |
| Bath and North East Somerset | 1982        | 0.95<br>(0.88–1.02) |
| Bath and North East Somerset | 1983        | 0.96<br>(0.9–1.03)  |
| Bath and North East Somerset | 1984        | 0.95<br>(0.88–1.01) |
| Bath and North East Somerset | 1985        | 0.97<br>(0.9–1.05)  |
| Bath and North East Somerset | 1986        | 1.02<br>(0.94–1.09) |
| Bath and North East Somerset | 1987        | 1.02<br>(0.96–1.1)  |
| Bath and North East Somerset | 1988        | 1.06<br>(0.98–1.14) |
| Bath and North East Somerset | 1989        | 1.02<br>(0.95–1.11) |
| Bath and North East Somerset | 1990        | 0.99<br>(0.92–1.07) |
| Bath and North East Somerset | 1991        | 0.96<br>(0.88–1.04) |
| Bath and North East Somerset | 1992        | 0.92<br>(0.84–0.99) |
| Bath and North East Somerset | 1993        | 0.94<br>(0.87–1.01) |
| Bath and North East Somerset | 1994        | 0.95<br>(0.88–1.03) |
| Bath and North East Somerset | 1995        | 0.97<br>(0.89–1.05) |
| Bath and North East Somerset | 1996        | 1.01<br>(0.92–1.1)  |
| Bath and North East Somerset | 1997        | 1.0<br>(0.91–1.1)   |
| Bath and North East Somerset | 1998        | 0.98<br>(0.88–1.08) |
| Bath and North East Somerset | 1999        | 1.0<br>(0.91–1.11)  |
| Bath and North East Somerset | 2000        | 1.0<br>(0.9–1.12)   |
| Bath and North East Somerset | 2001        | 1.0<br>(0.91–1.11)  |
| Bath and North East Somerset | 2002        | 0.99<br>(0.9–1.09)  |
| Bath and North East Somerset | 2003        | 1.03<br>(0.93–1.14) |
| Bath and North East Somerset | 2004        | 1.02<br>(0.9–1.14)  |
| Bath and North East Somerset | 2005        | 1.02<br>(0.91–1.14) |

**Table 15 Ratio of adjusted to unadjusted 5q0 values for scaled locations by year**

| <b>Geography</b>             | <b>Year</b> | <b>Ratio</b>        |
|------------------------------|-------------|---------------------|
| Bath and North East Somerset | 2006        | 1.04<br>(0.93–1.18) |
| Bath and North East Somerset | 2007        | 1.04<br>(0.93–1.17) |
| Bath and North East Somerset | 2008        | 1.03<br>(0.91–1.16) |
| Bath and North East Somerset | 2009        | 1.01<br>(0.91–1.12) |
| Bath and North East Somerset | 2010        | 0.97<br>(0.89–1.06) |
| Bath and North East Somerset | 2011        | 1.0<br>(0.92–1.1)   |
| Bath and North East Somerset | 2012        | 1.01<br>(0.92–1.1)  |
| Bath and North East Somerset | 2013        | 0.99<br>(0.89–1.09) |
| Bath and North East Somerset | 2014        | 0.97<br>(0.87–1.08) |
| Bath and North East Somerset | 2015        | 0.99<br>(0.88–1.1)  |
| Bath and North East Somerset | 2016        | 0.96<br>(0.87–1.06) |
| Bath and North East Somerset | 2017        | 0.99<br>(0.85–1.15) |
| Bournemouth                  | 1950        | 0.7<br>(0.58–0.84)  |
| Bournemouth                  | 1951        | 0.81<br>(0.67–0.97) |
| Bournemouth                  | 1952        | 0.76<br>(0.63–0.91) |
| Bournemouth                  | 1953        | 0.77<br>(0.63–0.92) |
| Bournemouth                  | 1954        | 0.72<br>(0.6–0.87)  |
| Bournemouth                  | 1955        | 0.72<br>(0.6–0.86)  |
| Bournemouth                  | 1956        | 0.71<br>(0.6–0.84)  |
| Bournemouth                  | 1957        | 0.72<br>(0.61–0.84) |
| Bournemouth                  | 1958        | 0.71<br>(0.61–0.81) |
| Bournemouth                  | 1959        | 0.71<br>(0.61–0.82) |
| Bournemouth                  | 1960        | 0.72<br>(0.62–0.85) |
| Bournemouth                  | 1961        | 0.74<br>(0.62–0.87) |
| Bournemouth                  | 1962        | 0.76<br>(0.64–0.91) |
| Bournemouth                  | 1963        | 0.77<br>(0.63–0.91) |
| Bournemouth                  | 1964        | 0.75<br>(0.61–0.89) |
| Bournemouth                  | 1965        | 0.73<br>(0.6–0.87)  |
| Bournemouth                  | 1966        | 0.76<br>(0.62–0.9)  |
| Bournemouth                  | 1967        | 0.75<br>(0.6–0.9)   |
| Bournemouth                  | 1968        | 0.78<br>(0.63–0.95) |

**Table 15 Ratio of adjusted to unadjusted 5q0 values for scaled locations by year**

| <b>Geography</b> | <b>Year</b> | <b>Ratio</b>        |
|------------------|-------------|---------------------|
| Bournemouth      | 1969        | 0.8<br>(0.65–0.97)  |
| Bournemouth      | 1970        | 0.83<br>(0.68–1.0)  |
| Bournemouth      | 1971        | 0.86<br>(0.72–1.02) |
| Bournemouth      | 1972        | 0.86<br>(0.73–1.02) |
| Bournemouth      | 1973        | 0.87<br>(0.75–1.01) |
| Bournemouth      | 1974        | 0.88<br>(0.77–1.01) |
| Bournemouth      | 1975        | 0.89<br>(0.76–1.02) |
| Bournemouth      | 1976        | 0.86<br>(0.73–1.0)  |
| Bournemouth      | 1977        | 0.88<br>(0.75–1.03) |
| Bournemouth      | 1978        | 0.93<br>(0.79–1.09) |
| Bournemouth      | 1979        | 0.95<br>(0.83–1.09) |
| Bournemouth      | 1980        | 0.94<br>(0.85–1.04) |
| Bournemouth      | 1981        | 0.9<br>(0.82–0.98)  |
| Bournemouth      | 1982        | 0.95<br>(0.88–1.02) |
| Bournemouth      | 1983        | 0.96<br>(0.9–1.03)  |
| Bournemouth      | 1984        | 0.95<br>(0.88–1.01) |
| Bournemouth      | 1985        | 0.97<br>(0.9–1.05)  |
| Bournemouth      | 1986        | 1.02<br>(0.94–1.09) |
| Bournemouth      | 1987        | 1.02<br>(0.96–1.1)  |
| Bournemouth      | 1988        | 1.06<br>(0.98–1.14) |
| Bournemouth      | 1989        | 1.02<br>(0.95–1.11) |
| Bournemouth      | 1990        | 0.99<br>(0.92–1.07) |
| Bournemouth      | 1991        | 0.96<br>(0.88–1.04) |
| Bournemouth      | 1992        | 0.92<br>(0.84–0.99) |
| Bournemouth      | 1993        | 0.94<br>(0.87–1.01) |
| Bournemouth      | 1994        | 0.95<br>(0.88–1.03) |
| Bournemouth      | 1995        | 0.97<br>(0.89–1.05) |
| Bournemouth      | 1996        | 1.01<br>(0.92–1.1)  |
| Bournemouth      | 1997        | 1.0<br>(0.91–1.1)   |
| Bournemouth      | 1998        | 0.98<br>(0.89–1.08) |
| Bournemouth      | 1999        | 1.0<br>(0.91–1.11)  |

**Table 15 Ratio of adjusted to unadjusted 5q0 values for scaled locations by year**

| <b>Geography</b> | <b>Year</b> | <b>Ratio</b>        |
|------------------|-------------|---------------------|
| Bournemouth      | 2000        | 1.0<br>(0.9–1.12)   |
| Bournemouth      | 2001        | 1.0<br>(0.91–1.11)  |
| Bournemouth      | 2002        | 0.99<br>(0.9–1.09)  |
| Bournemouth      | 2003        | 1.03<br>(0.93–1.14) |
| Bournemouth      | 2004        | 1.02<br>(0.9–1.14)  |
| Bournemouth      | 2005        | 1.02<br>(0.91–1.14) |
| Bournemouth      | 2006        | 1.04<br>(0.93–1.18) |
| Bournemouth      | 2007        | 1.04<br>(0.93–1.17) |
| Bournemouth      | 2008        | 1.03<br>(0.91–1.16) |
| Bournemouth      | 2009        | 1.01<br>(0.91–1.12) |
| Bournemouth      | 2010        | 0.97<br>(0.89–1.06) |
| Bournemouth      | 2011        | 1.0<br>(0.92–1.1)   |
| Bournemouth      | 2012        | 1.01<br>(0.92–1.1)  |
| Bournemouth      | 2013        | 0.99<br>(0.89–1.09) |
| Bournemouth      | 2014        | 0.97<br>(0.87–1.08) |
| Bournemouth      | 2015        | 0.99<br>(0.88–1.1)  |
| Bournemouth      | 2016        | 0.96<br>(0.87–1.06) |
| Bournemouth      | 2017        | 0.99<br>(0.85–1.15) |
| Bristol, City of | 1950        | 0.7<br>(0.58–0.84)  |
| Bristol, City of | 1951        | 0.81<br>(0.67–0.97) |
| Bristol, City of | 1952        | 0.76<br>(0.63–0.91) |
| Bristol, City of | 1953        | 0.77<br>(0.63–0.92) |
| Bristol, City of | 1954        | 0.72<br>(0.6–0.87)  |
| Bristol, City of | 1955        | 0.72<br>(0.6–0.86)  |
| Bristol, City of | 1956        | 0.71<br>(0.6–0.84)  |
| Bristol, City of | 1957        | 0.72<br>(0.61–0.84) |
| Bristol, City of | 1958        | 0.71<br>(0.61–0.81) |
| Bristol, City of | 1959        | 0.71<br>(0.61–0.82) |
| Bristol, City of | 1960        | 0.72<br>(0.62–0.85) |
| Bristol, City of | 1961        | 0.74<br>(0.62–0.87) |
| Bristol, City of | 1962        | 0.76<br>(0.64–0.91) |

**Table 15 Ratio of adjusted to unadjusted 5q0 values for scaled locations by year**

| <b>Geography</b> | <b>Year</b> | <b>Ratio</b>        |
|------------------|-------------|---------------------|
| Bristol, City of | 1963        | 0.77<br>(0.63–0.91) |
| Bristol, City of | 1964        | 0.75<br>(0.62–0.89) |
| Bristol, City of | 1965        | 0.73<br>(0.6–0.87)  |
| Bristol, City of | 1966        | 0.76<br>(0.62–0.9)  |
| Bristol, City of | 1967        | 0.75<br>(0.6–0.9)   |
| Bristol, City of | 1968        | 0.78<br>(0.63–0.95) |
| Bristol, City of | 1969        | 0.8<br>(0.65–0.97)  |
| Bristol, City of | 1970        | 0.83<br>(0.69–1.0)  |
| Bristol, City of | 1971        | 0.86<br>(0.72–1.02) |
| Bristol, City of | 1972        | 0.86<br>(0.73–1.02) |
| Bristol, City of | 1973        | 0.87<br>(0.75–1.01) |
| Bristol, City of | 1974        | 0.88<br>(0.77–1.01) |
| Bristol, City of | 1975        | 0.89<br>(0.76–1.02) |
| Bristol, City of | 1976        | 0.86<br>(0.73–1.0)  |
| Bristol, City of | 1977        | 0.88<br>(0.75–1.03) |
| Bristol, City of | 1978        | 0.93<br>(0.79–1.09) |
| Bristol, City of | 1979        | 0.95<br>(0.83–1.09) |
| Bristol, City of | 1980        | 0.94<br>(0.85–1.04) |
| Bristol, City of | 1981        | 0.9<br>(0.82–0.98)  |
| Bristol, City of | 1982        | 0.95<br>(0.88–1.02) |
| Bristol, City of | 1983        | 0.96<br>(0.9–1.03)  |
| Bristol, City of | 1984        | 0.95<br>(0.88–1.01) |
| Bristol, City of | 1985        | 0.97<br>(0.9–1.05)  |
| Bristol, City of | 1986        | 1.02<br>(0.94–1.09) |
| Bristol, City of | 1987        | 1.02<br>(0.96–1.1)  |
| Bristol, City of | 1988        | 1.06<br>(0.98–1.14) |
| Bristol, City of | 1989        | 1.02<br>(0.95–1.11) |
| Bristol, City of | 1990        | 0.99<br>(0.92–1.07) |
| Bristol, City of | 1991        | 0.96<br>(0.88–1.04) |
| Bristol, City of | 1992        | 0.92<br>(0.84–0.99) |
| Bristol, City of | 1993        | 0.94<br>(0.87–1.01) |

**Table 15 Ratio of adjusted to unadjusted 5q0 values for scaled locations by year**

| <b>Geography</b> | <b>Year</b> | <b>Ratio</b>        |
|------------------|-------------|---------------------|
| Bristol, City of | 1994        | 0.95<br>(0.88–1.03) |
| Bristol, City of | 1995        | 0.97<br>(0.89–1.05) |
| Bristol, City of | 1996        | 1.01<br>(0.92–1.1)  |
| Bristol, City of | 1997        | 1.0<br>(0.91–1.09)  |
| Bristol, City of | 1998        | 0.98<br>(0.89–1.08) |
| Bristol, City of | 1999        | 1.0<br>(0.91–1.11)  |
| Bristol, City of | 2000        | 1.0<br>(0.9–1.12)   |
| Bristol, City of | 2001        | 1.0<br>(0.91–1.11)  |
| Bristol, City of | 2002        | 0.99<br>(0.9–1.09)  |
| Bristol, City of | 2003        | 1.03<br>(0.93–1.14) |
| Bristol, City of | 2004        | 1.02<br>(0.9–1.14)  |
| Bristol, City of | 2005        | 1.02<br>(0.91–1.14) |
| Bristol, City of | 2006        | 1.04<br>(0.93–1.18) |
| Bristol, City of | 2007        | 1.04<br>(0.93–1.17) |
| Bristol, City of | 2008        | 1.03<br>(0.91–1.16) |
| Bristol, City of | 2009        | 1.01<br>(0.91–1.12) |
| Bristol, City of | 2010        | 0.97<br>(0.89–1.06) |
| Bristol, City of | 2011        | 1.0<br>(0.92–1.1)   |
| Bristol, City of | 2012        | 1.01<br>(0.92–1.1)  |
| Bristol, City of | 2013        | 0.99<br>(0.89–1.09) |
| Bristol, City of | 2014        | 0.97<br>(0.87–1.08) |
| Bristol, City of | 2015        | 0.99<br>(0.88–1.1)  |
| Bristol, City of | 2016        | 0.96<br>(0.87–1.06) |
| Bristol, City of | 2017        | 0.99<br>(0.85–1.15) |
| Cornwall         | 1950        | 0.7<br>(0.58–0.84)  |
| Cornwall         | 1951        | 0.81<br>(0.67–0.97) |
| Cornwall         | 1952        | 0.76<br>(0.63–0.91) |
| Cornwall         | 1953        | 0.77<br>(0.63–0.92) |
| Cornwall         | 1954        | 0.72<br>(0.6–0.87)  |
| Cornwall         | 1955        | 0.72<br>(0.6–0.86)  |
| Cornwall         | 1956        | 0.71<br>(0.6–0.84)  |

**Table 15 Ratio of adjusted to unadjusted 5q0 values for scaled locations by year**

| <b>Geography</b> | <b>Year</b> | <b>Ratio</b>        |
|------------------|-------------|---------------------|
| Cornwall         | 1957        | 0.72<br>(0.61–0.84) |
| Cornwall         | 1958        | 0.71<br>(0.61–0.81) |
| Cornwall         | 1959        | 0.71<br>(0.61–0.82) |
| Cornwall         | 1960        | 0.72<br>(0.62–0.85) |
| Cornwall         | 1961        | 0.74<br>(0.62–0.87) |
| Cornwall         | 1962        | 0.76<br>(0.64–0.91) |
| Cornwall         | 1963        | 0.77<br>(0.63–0.91) |
| Cornwall         | 1964        | 0.75<br>(0.61–0.89) |
| Cornwall         | 1965        | 0.73<br>(0.6–0.87)  |
| Cornwall         | 1966        | 0.76<br>(0.62–0.9)  |
| Cornwall         | 1967        | 0.75<br>(0.6–0.9)   |
| Cornwall         | 1968        | 0.78<br>(0.63–0.95) |
| Cornwall         | 1969        | 0.8<br>(0.65–0.97)  |
| Cornwall         | 1970        | 0.83<br>(0.68–1.0)  |
| Cornwall         | 1971        | 0.86<br>(0.72–1.02) |
| Cornwall         | 1972        | 0.86<br>(0.73–1.02) |
| Cornwall         | 1973        | 0.87<br>(0.75–1.01) |
| Cornwall         | 1974        | 0.88<br>(0.77–1.01) |
| Cornwall         | 1975        | 0.89<br>(0.76–1.02) |
| Cornwall         | 1976        | 0.86<br>(0.73–1.0)  |
| Cornwall         | 1977        | 0.88<br>(0.75–1.03) |
| Cornwall         | 1978        | 0.93<br>(0.79–1.09) |
| Cornwall         | 1979        | 0.95<br>(0.83–1.09) |
| Cornwall         | 1980        | 0.94<br>(0.85–1.04) |
| Cornwall         | 1981        | 0.9<br>(0.82–0.98)  |
| Cornwall         | 1982        | 0.95<br>(0.88–1.02) |
| Cornwall         | 1983        | 0.96<br>(0.9–1.03)  |
| Cornwall         | 1984        | 0.95<br>(0.88–1.01) |
| Cornwall         | 1985        | 0.97<br>(0.9–1.05)  |
| Cornwall         | 1986        | 1.02<br>(0.94–1.09) |
| Cornwall         | 1987        | 1.02<br>(0.96–1.1)  |



**Table 15 Ratio of adjusted to unadjusted 5q0 values for scaled locations by year**

| <b>Geography</b> | <b>Year</b> | <b>Ratio</b>        |
|------------------|-------------|---------------------|
| Cornwall         | 1988        | 1.06<br>(0.98–1.14) |
| Cornwall         | 1989        | 1.02<br>(0.95–1.11) |
| Cornwall         | 1990        | 0.99<br>(0.92–1.07) |
| Cornwall         | 1991        | 0.96<br>(0.88–1.04) |
| Cornwall         | 1992        | 0.92<br>(0.84–0.99) |
| Cornwall         | 1993        | 0.94<br>(0.87–1.01) |
| Cornwall         | 1994        | 0.95<br>(0.88–1.03) |
| Cornwall         | 1995        | 0.97<br>(0.89–1.05) |
| Cornwall         | 1996        | 1.01<br>(0.92–1.1)  |
| Cornwall         | 1997        | 1.0<br>(0.91–1.1)   |
| Cornwall         | 1998        | 0.98<br>(0.89–1.08) |
| Cornwall         | 1999        | 1.0<br>(0.91–1.11)  |
| Cornwall         | 2000        | 1.0<br>(0.9–1.12)   |
| Cornwall         | 2001        | 1.0<br>(0.91–1.11)  |
| Cornwall         | 2002        | 0.99<br>(0.9–1.09)  |
| Cornwall         | 2003        | 1.03<br>(0.93–1.14) |
| Cornwall         | 2004        | 1.02<br>(0.9–1.14)  |
| Cornwall         | 2005        | 1.02<br>(0.91–1.14) |
| Cornwall         | 2006        | 1.04<br>(0.93–1.18) |
| Cornwall         | 2007        | 1.04<br>(0.93–1.17) |
| Cornwall         | 2008        | 1.03<br>(0.91–1.16) |
| Cornwall         | 2009        | 1.01<br>(0.91–1.12) |
| Cornwall         | 2010        | 0.97<br>(0.89–1.06) |
| Cornwall         | 2011        | 1.0<br>(0.92–1.1)   |
| Cornwall         | 2012        | 1.01<br>(0.92–1.1)  |
| Cornwall         | 2013        | 0.99<br>(0.89–1.09) |
| Cornwall         | 2014        | 0.97<br>(0.87–1.08) |
| Cornwall         | 2015        | 0.99<br>(0.88–1.1)  |
| Cornwall         | 2016        | 0.96<br>(0.87–1.06) |
| Cornwall         | 2017        | 0.99<br>(0.85–1.15) |
| Devon            | 1950        | 0.7<br>(0.58–0.84)  |

**Table 15 Ratio of adjusted to unadjusted 5q0 values for scaled locations by year**

| <b>Geography</b> | <b>Year</b> | <b>Ratio</b>        |
|------------------|-------------|---------------------|
| Devon            | 1951        | 0.81<br>(0.67–0.97) |
| Devon            | 1952        | 0.76<br>(0.63–0.91) |
| Devon            | 1953        | 0.77<br>(0.63–0.92) |
| Devon            | 1954        | 0.72<br>(0.6–0.87)  |
| Devon            | 1955        | 0.72<br>(0.6–0.86)  |
| Devon            | 1956        | 0.71<br>(0.6–0.84)  |
| Devon            | 1957        | 0.72<br>(0.61–0.84) |
| Devon            | 1958        | 0.71<br>(0.61–0.81) |
| Devon            | 1959        | 0.71<br>(0.61–0.82) |
| Devon            | 1960        | 0.72<br>(0.62–0.85) |
| Devon            | 1961        | 0.74<br>(0.62–0.87) |
| Devon            | 1962        | 0.76<br>(0.64–0.91) |
| Devon            | 1963        | 0.77<br>(0.63–0.91) |
| Devon            | 1964        | 0.75<br>(0.61–0.89) |
| Devon            | 1965        | 0.73<br>(0.6–0.87)  |
| Devon            | 1966        | 0.76<br>(0.62–0.9)  |
| Devon            | 1967        | 0.75<br>(0.6–0.9)   |
| Devon            | 1968        | 0.78<br>(0.63–0.95) |
| Devon            | 1969        | 0.8<br>(0.65–0.97)  |
| Devon            | 1970        | 0.83<br>(0.68–1.0)  |
| Devon            | 1971        | 0.86<br>(0.72–1.02) |
| Devon            | 1972        | 0.86<br>(0.73–1.02) |
| Devon            | 1973        | 0.87<br>(0.75–1.01) |
| Devon            | 1974        | 0.88<br>(0.77–1.01) |
| Devon            | 1975        | 0.89<br>(0.76–1.02) |
| Devon            | 1976        | 0.86<br>(0.73–1.0)  |
| Devon            | 1977        | 0.88<br>(0.75–1.03) |
| Devon            | 1978        | 0.93<br>(0.79–1.09) |
| Devon            | 1979        | 0.95<br>(0.83–1.09) |
| Devon            | 1980        | 0.94<br>(0.85–1.04) |
| Devon            | 1981        | 0.9<br>(0.82–0.98)  |

**Table 15 Ratio of adjusted to unadjusted 5q0 values for scaled locations by year**

| <b>Geography</b> | <b>Year</b> | <b>Ratio</b>        |
|------------------|-------------|---------------------|
| Devon            | 1982        | 0.95<br>(0.88–1.02) |
| Devon            | 1983        | 0.96<br>(0.9–1.03)  |
| Devon            | 1984        | 0.95<br>(0.88–1.01) |
| Devon            | 1985        | 0.97<br>(0.9–1.05)  |
| Devon            | 1986        | 1.02<br>(0.94–1.09) |
| Devon            | 1987        | 1.02<br>(0.96–1.1)  |
| Devon            | 1988        | 1.06<br>(0.98–1.14) |
| Devon            | 1989        | 1.02<br>(0.95–1.11) |
| Devon            | 1990        | 0.99<br>(0.92–1.07) |
| Devon            | 1991        | 0.96<br>(0.88–1.04) |
| Devon            | 1992        | 0.92<br>(0.84–0.99) |
| Devon            | 1993        | 0.94<br>(0.87–1.01) |
| Devon            | 1994        | 0.95<br>(0.88–1.03) |
| Devon            | 1995        | 0.97<br>(0.89–1.05) |
| Devon            | 1996        | 1.01<br>(0.92–1.1)  |
| Devon            | 1997        | 1.0<br>(0.91–1.1)   |
| Devon            | 1998        | 0.98<br>(0.88–1.08) |
| Devon            | 1999        | 1.0<br>(0.91–1.11)  |
| Devon            | 2000        | 1.0<br>(0.9–1.12)   |
| Devon            | 2001        | 1.0<br>(0.91–1.11)  |
| Devon            | 2002        | 0.99<br>(0.9–1.09)  |
| Devon            | 2003        | 1.03<br>(0.93–1.14) |
| Devon            | 2004        | 1.02<br>(0.9–1.14)  |
| Devon            | 2005        | 1.02<br>(0.91–1.14) |
| Devon            | 2006        | 1.04<br>(0.93–1.18) |
| Devon            | 2007        | 1.04<br>(0.93–1.17) |
| Devon            | 2008        | 1.03<br>(0.91–1.16) |
| Devon            | 2009        | 1.01<br>(0.91–1.12) |
| Devon            | 2010        | 0.97<br>(0.89–1.06) |
| Devon            | 2011        | 1.0<br>(0.92–1.1)   |
| Devon            | 2012        | 1.01<br>(0.92–1.1)  |

**Table 15 Ratio of adjusted to unadjusted 5q0 values for scaled locations by year**

| <b>Geography</b> | <b>Year</b> | <b>Ratio</b>        |
|------------------|-------------|---------------------|
| Devon            | 2013        | 0.99<br>(0.89–1.09) |
| Devon            | 2014        | 0.97<br>(0.87–1.08) |
| Devon            | 2015        | 0.99<br>(0.88–1.1)  |
| Devon            | 2016        | 0.96<br>(0.87–1.06) |
| Devon            | 2017        | 0.99<br>(0.85–1.15) |
| Dorset           | 1950        | 0.7<br>(0.58–0.84)  |
| Dorset           | 1951        | 0.81<br>(0.67–0.97) |
| Dorset           | 1952        | 0.76<br>(0.63–0.91) |
| Dorset           | 1953        | 0.77<br>(0.63–0.92) |
| Dorset           | 1954        | 0.72<br>(0.6–0.87)  |
| Dorset           | 1955        | 0.72<br>(0.6–0.86)  |
| Dorset           | 1956        | 0.71<br>(0.6–0.84)  |
| Dorset           | 1957        | 0.72<br>(0.61–0.84) |
| Dorset           | 1958        | 0.71<br>(0.61–0.81) |
| Dorset           | 1959        | 0.71<br>(0.61–0.82) |
| Dorset           | 1960        | 0.72<br>(0.62–0.85) |
| Dorset           | 1961        | 0.74<br>(0.62–0.87) |
| Dorset           | 1962        | 0.76<br>(0.64–0.91) |
| Dorset           | 1963        | 0.77<br>(0.63–0.91) |
| Dorset           | 1964        | 0.75<br>(0.61–0.89) |
| Dorset           | 1965        | 0.73<br>(0.6–0.87)  |
| Dorset           | 1966        | 0.76<br>(0.62–0.9)  |
| Dorset           | 1967        | 0.75<br>(0.6–0.9)   |
| Dorset           | 1968        | 0.78<br>(0.63–0.95) |
| Dorset           | 1969        | 0.8<br>(0.65–0.97)  |
| Dorset           | 1970        | 0.83<br>(0.68–1.0)  |
| Dorset           | 1971        | 0.86<br>(0.72–1.02) |
| Dorset           | 1972        | 0.86<br>(0.73–1.02) |
| Dorset           | 1973        | 0.87<br>(0.75–1.01) |
| Dorset           | 1974        | 0.88<br>(0.77–1.01) |
| Dorset           | 1975        | 0.89<br>(0.76–1.02) |

**Table 15 Ratio of adjusted to unadjusted 5q0 values for scaled locations by year**

| <b>Geography</b> | <b>Year</b> | <b>Ratio</b>        |
|------------------|-------------|---------------------|
| Dorset           | 1976        | 0.86<br>(0.73–1.0)  |
| Dorset           | 1977        | 0.88<br>(0.75–1.03) |
| Dorset           | 1978        | 0.93<br>(0.79–1.09) |
| Dorset           | 1979        | 0.95<br>(0.83–1.09) |
| Dorset           | 1980        | 0.94<br>(0.85–1.04) |
| Dorset           | 1981        | 0.9<br>(0.82–0.98)  |
| Dorset           | 1982        | 0.95<br>(0.88–1.02) |
| Dorset           | 1983        | 0.96<br>(0.9–1.03)  |
| Dorset           | 1984        | 0.95<br>(0.88–1.01) |
| Dorset           | 1985        | 0.97<br>(0.9–1.05)  |
| Dorset           | 1986        | 1.02<br>(0.94–1.09) |
| Dorset           | 1987        | 1.02<br>(0.96–1.1)  |
| Dorset           | 1988        | 1.06<br>(0.98–1.14) |
| Dorset           | 1989        | 1.02<br>(0.95–1.11) |
| Dorset           | 1990        | 0.99<br>(0.92–1.07) |
| Dorset           | 1991        | 0.96<br>(0.88–1.04) |
| Dorset           | 1992        | 0.92<br>(0.84–0.99) |
| Dorset           | 1993        | 0.94<br>(0.87–1.01) |
| Dorset           | 1994        | 0.95<br>(0.88–1.03) |
| Dorset           | 1995        | 0.97<br>(0.89–1.05) |
| Dorset           | 1996        | 1.01<br>(0.92–1.1)  |
| Dorset           | 1997        | 1.0<br>(0.91–1.1)   |
| Dorset           | 1998        | 0.98<br>(0.88–1.08) |
| Dorset           | 1999        | 1.0<br>(0.91–1.11)  |
| Dorset           | 2000        | 1.0<br>(0.9–1.12)   |
| Dorset           | 2001        | 1.0<br>(0.91–1.11)  |
| Dorset           | 2002        | 0.99<br>(0.9–1.09)  |
| Dorset           | 2003        | 1.03<br>(0.93–1.14) |
| Dorset           | 2004        | 1.02<br>(0.9–1.14)  |
| Dorset           | 2005        | 1.02<br>(0.91–1.14) |
| Dorset           | 2006        | 1.04<br>(0.93–1.18) |

**Table 15 Ratio of adjusted to unadjusted 5q0 values for scaled locations by year**

| <b>Geography</b> | <b>Year</b> | <b>Ratio</b>        |
|------------------|-------------|---------------------|
| Dorset           | 2007        | 1.04<br>(0.93–1.17) |
| Dorset           | 2008        | 1.03<br>(0.91–1.16) |
| Dorset           | 2009        | 1.01<br>(0.91–1.12) |
| Dorset           | 2010        | 0.97<br>(0.89–1.06) |
| Dorset           | 2011        | 1.0<br>(0.92–1.1)   |
| Dorset           | 2012        | 1.01<br>(0.92–1.1)  |
| Dorset           | 2013        | 0.99<br>(0.89–1.09) |
| Dorset           | 2014        | 0.97<br>(0.87–1.08) |
| Dorset           | 2015        | 0.99<br>(0.88–1.1)  |
| Dorset           | 2016        | 0.96<br>(0.87–1.06) |
| Dorset           | 2017        | 0.99<br>(0.85–1.15) |
| Gloucestershire  | 1950        | 0.7<br>(0.58–0.84)  |
| Gloucestershire  | 1951        | 0.81<br>(0.67–0.97) |
| Gloucestershire  | 1952        | 0.76<br>(0.63–0.91) |
| Gloucestershire  | 1953        | 0.77<br>(0.63–0.92) |
| Gloucestershire  | 1954        | 0.72<br>(0.6–0.87)  |
| Gloucestershire  | 1955        | 0.72<br>(0.6–0.86)  |
| Gloucestershire  | 1956        | 0.71<br>(0.6–0.84)  |
| Gloucestershire  | 1957        | 0.72<br>(0.61–0.84) |
| Gloucestershire  | 1958        | 0.71<br>(0.61–0.81) |
| Gloucestershire  | 1959        | 0.71<br>(0.61–0.82) |
| Gloucestershire  | 1960        | 0.72<br>(0.62–0.85) |
| Gloucestershire  | 1961        | 0.74<br>(0.62–0.87) |
| Gloucestershire  | 1962        | 0.76<br>(0.64–0.91) |
| Gloucestershire  | 1963        | 0.77<br>(0.63–0.91) |
| Gloucestershire  | 1964        | 0.75<br>(0.61–0.89) |
| Gloucestershire  | 1965        | 0.73<br>(0.6–0.87)  |
| Gloucestershire  | 1966        | 0.76<br>(0.62–0.9)  |
| Gloucestershire  | 1967        | 0.75<br>(0.6–0.9)   |
| Gloucestershire  | 1968        | 0.78<br>(0.63–0.95) |
| Gloucestershire  | 1969        | 0.8<br>(0.65–0.97)  |

**Table 15 Ratio of adjusted to unadjusted 5q0 values for scaled locations by year**

| <b>Geography</b> | <b>Year</b> | <b>Ratio</b>        |
|------------------|-------------|---------------------|
| Gloucestershire  | 1970        | 0.83<br>(0.68–1.0)  |
| Gloucestershire  | 1971        | 0.86<br>(0.72–1.02) |
| Gloucestershire  | 1972        | 0.86<br>(0.73–1.02) |
| Gloucestershire  | 1973        | 0.87<br>(0.75–1.01) |
| Gloucestershire  | 1974        | 0.88<br>(0.77–1.01) |
| Gloucestershire  | 1975        | 0.89<br>(0.76–1.02) |
| Gloucestershire  | 1976        | 0.86<br>(0.73–1.0)  |
| Gloucestershire  | 1977        | 0.88<br>(0.75–1.03) |
| Gloucestershire  | 1978        | 0.93<br>(0.79–1.09) |
| Gloucestershire  | 1979        | 0.95<br>(0.83–1.09) |
| Gloucestershire  | 1980        | 0.94<br>(0.85–1.04) |
| Gloucestershire  | 1981        | 0.9<br>(0.82–0.98)  |
| Gloucestershire  | 1982        | 0.95<br>(0.88–1.02) |
| Gloucestershire  | 1983        | 0.96<br>(0.9–1.03)  |
| Gloucestershire  | 1984        | 0.95<br>(0.88–1.01) |
| Gloucestershire  | 1985        | 0.97<br>(0.9–1.05)  |
| Gloucestershire  | 1986        | 1.02<br>(0.94–1.09) |
| Gloucestershire  | 1987        | 1.02<br>(0.96–1.1)  |
| Gloucestershire  | 1988        | 1.06<br>(0.98–1.14) |
| Gloucestershire  | 1989        | 1.02<br>(0.95–1.11) |
| Gloucestershire  | 1990        | 0.99<br>(0.92–1.07) |
| Gloucestershire  | 1991        | 0.96<br>(0.88–1.04) |
| Gloucestershire  | 1992        | 0.92<br>(0.84–0.99) |
| Gloucestershire  | 1993        | 0.94<br>(0.87–1.01) |
| Gloucestershire  | 1994        | 0.95<br>(0.88–1.03) |
| Gloucestershire  | 1995        | 0.97<br>(0.89–1.05) |
| Gloucestershire  | 1996        | 1.01<br>(0.92–1.1)  |
| Gloucestershire  | 1997        | 1.0<br>(0.91–1.1)   |
| Gloucestershire  | 1998        | 0.98<br>(0.89–1.08) |
| Gloucestershire  | 1999        | 1.0<br>(0.91–1.11)  |
| Gloucestershire  | 2000        | 1.0<br>(0.9–1.12)   |

**Table 15 Ratio of adjusted to unadjusted 5q0 values for scaled locations by year**

| <b>Geography</b> | <b>Year</b> | <b>Ratio</b>        |
|------------------|-------------|---------------------|
| Gloucestershire  | 2001        | 1.0<br>(0.91–1.11)  |
| Gloucestershire  | 2002        | 0.99<br>(0.9–1.09)  |
| Gloucestershire  | 2003        | 1.03<br>(0.93–1.14) |
| Gloucestershire  | 2004        | 1.02<br>(0.9–1.14)  |
| Gloucestershire  | 2005        | 1.02<br>(0.91–1.14) |
| Gloucestershire  | 2006        | 1.04<br>(0.93–1.18) |
| Gloucestershire  | 2007        | 1.04<br>(0.93–1.17) |
| Gloucestershire  | 2008        | 1.03<br>(0.91–1.16) |
| Gloucestershire  | 2009        | 1.01<br>(0.91–1.12) |
| Gloucestershire  | 2010        | 0.97<br>(0.89–1.06) |
| Gloucestershire  | 2011        | 1.0<br>(0.92–1.1)   |
| Gloucestershire  | 2012        | 1.01<br>(0.92–1.1)  |
| Gloucestershire  | 2013        | 0.99<br>(0.89–1.09) |
| Gloucestershire  | 2014        | 0.97<br>(0.87–1.08) |
| Gloucestershire  | 2015        | 0.99<br>(0.88–1.1)  |
| Gloucestershire  | 2016        | 0.96<br>(0.87–1.06) |
| Gloucestershire  | 2017        | 0.99<br>(0.85–1.15) |
| North Somerset   | 1950        | 0.7<br>(0.58–0.84)  |
| North Somerset   | 1951        | 0.81<br>(0.67–0.97) |
| North Somerset   | 1952        | 0.76<br>(0.63–0.91) |
| North Somerset   | 1953        | 0.77<br>(0.63–0.92) |
| North Somerset   | 1954        | 0.72<br>(0.6–0.87)  |
| North Somerset   | 1955        | 0.72<br>(0.6–0.86)  |
| North Somerset   | 1956        | 0.71<br>(0.6–0.84)  |
| North Somerset   | 1957        | 0.72<br>(0.61–0.84) |
| North Somerset   | 1958        | 0.71<br>(0.61–0.81) |
| North Somerset   | 1959        | 0.71<br>(0.61–0.82) |
| North Somerset   | 1960        | 0.72<br>(0.62–0.85) |
| North Somerset   | 1961        | 0.74<br>(0.62–0.87) |
| North Somerset   | 1962        | 0.76<br>(0.64–0.91) |
| North Somerset   | 1963        | 0.77<br>(0.63–0.91) |



**Table 15 Ratio of adjusted to unadjusted 5q0 values for scaled locations by year**

| <b>Geography</b> | <b>Year</b> | <b>Ratio</b>        |
|------------------|-------------|---------------------|
| North Somerset   | 1964        | 0.75<br>(0.61–0.89) |
| North Somerset   | 1965        | 0.73<br>(0.6–0.87)  |
| North Somerset   | 1966        | 0.76<br>(0.62–0.9)  |
| North Somerset   | 1967        | 0.75<br>(0.6–0.9)   |
| North Somerset   | 1968        | 0.78<br>(0.63–0.95) |
| North Somerset   | 1969        | 0.8<br>(0.65–0.97)  |
| North Somerset   | 1970        | 0.83<br>(0.68–1.0)  |
| North Somerset   | 1971        | 0.86<br>(0.72–1.02) |
| North Somerset   | 1972        | 0.86<br>(0.73–1.02) |
| North Somerset   | 1973        | 0.87<br>(0.75–1.01) |
| North Somerset   | 1974        | 0.88<br>(0.77–1.01) |
| North Somerset   | 1975        | 0.89<br>(0.76–1.02) |
| North Somerset   | 1976        | 0.86<br>(0.73–1.0)  |
| North Somerset   | 1977        | 0.88<br>(0.75–1.03) |
| North Somerset   | 1978        | 0.93<br>(0.79–1.09) |
| North Somerset   | 1979        | 0.95<br>(0.83–1.09) |
| North Somerset   | 1980        | 0.94<br>(0.85–1.04) |
| North Somerset   | 1981        | 0.9<br>(0.82–0.98)  |
| North Somerset   | 1982        | 0.95<br>(0.88–1.02) |
| North Somerset   | 1983        | 0.96<br>(0.9–1.03)  |
| North Somerset   | 1984        | 0.95<br>(0.88–1.01) |
| North Somerset   | 1985        | 0.97<br>(0.9–1.05)  |
| North Somerset   | 1986        | 1.02<br>(0.94–1.09) |
| North Somerset   | 1987        | 1.02<br>(0.96–1.1)  |
| North Somerset   | 1988        | 1.06<br>(0.98–1.14) |
| North Somerset   | 1989        | 1.02<br>(0.95–1.11) |
| North Somerset   | 1990        | 0.99<br>(0.92–1.07) |
| North Somerset   | 1991        | 0.96<br>(0.88–1.04) |
| North Somerset   | 1992        | 0.92<br>(0.84–0.99) |
| North Somerset   | 1993        | 0.94<br>(0.87–1.01) |
| North Somerset   | 1994        | 0.95<br>(0.88–1.03) |

**Table 15 Ratio of adjusted to unadjusted 5q0 values for scaled locations by year**

| <b>Geography</b> | <b>Year</b> | <b>Ratio</b>        |
|------------------|-------------|---------------------|
| North Somerset   | 1995        | 0.97<br>(0.89–1.05) |
| North Somerset   | 1996        | 1.01<br>(0.92–1.1)  |
| North Somerset   | 1997        | 1.0<br>(0.91–1.1)   |
| North Somerset   | 1998        | 0.98<br>(0.89–1.08) |
| North Somerset   | 1999        | 1.0<br>(0.91–1.11)  |
| North Somerset   | 2000        | 1.0<br>(0.9–1.12)   |
| North Somerset   | 2001        | 1.0<br>(0.91–1.11)  |
| North Somerset   | 2002        | 0.99<br>(0.9–1.09)  |
| North Somerset   | 2003        | 1.03<br>(0.93–1.14) |
| North Somerset   | 2004        | 1.02<br>(0.9–1.14)  |
| North Somerset   | 2005        | 1.02<br>(0.91–1.14) |
| North Somerset   | 2006        | 1.04<br>(0.93–1.18) |
| North Somerset   | 2007        | 1.04<br>(0.93–1.17) |
| North Somerset   | 2008        | 1.03<br>(0.91–1.16) |
| North Somerset   | 2009        | 1.01<br>(0.91–1.12) |
| North Somerset   | 2010        | 0.97<br>(0.89–1.06) |
| North Somerset   | 2011        | 1.0<br>(0.92–1.1)   |
| North Somerset   | 2012        | 1.01<br>(0.92–1.1)  |
| North Somerset   | 2013        | 0.99<br>(0.89–1.09) |
| North Somerset   | 2014        | 0.97<br>(0.87–1.08) |
| North Somerset   | 2015        | 0.99<br>(0.88–1.1)  |
| North Somerset   | 2016        | 0.96<br>(0.87–1.06) |
| North Somerset   | 2017        | 0.99<br>(0.85–1.15) |
| Plymouth         | 1950        | 0.7<br>(0.58–0.84)  |
| Plymouth         | 1951        | 0.81<br>(0.67–0.97) |
| Plymouth         | 1952        | 0.76<br>(0.63–0.91) |
| Plymouth         | 1953        | 0.77<br>(0.63–0.92) |
| Plymouth         | 1954        | 0.72<br>(0.6–0.87)  |
| Plymouth         | 1955        | 0.72<br>(0.6–0.86)  |
| Plymouth         | 1956        | 0.71<br>(0.6–0.84)  |
| Plymouth         | 1957        | 0.72<br>(0.61–0.84) |

**Table 15 Ratio of adjusted to unadjusted 5q0 values for scaled locations by year**

| <b>Geography</b> | <b>Year</b> | <b>Ratio</b>        |
|------------------|-------------|---------------------|
| Plymouth         | 1958        | 0.71<br>(0.61–0.81) |
| Plymouth         | 1959        | 0.71<br>(0.61–0.82) |
| Plymouth         | 1960        | 0.72<br>(0.62–0.85) |
| Plymouth         | 1961        | 0.74<br>(0.62–0.87) |
| Plymouth         | 1962        | 0.76<br>(0.64–0.91) |
| Plymouth         | 1963        | 0.77<br>(0.63–0.91) |
| Plymouth         | 1964        | 0.75<br>(0.61–0.89) |
| Plymouth         | 1965        | 0.73<br>(0.6–0.87)  |
| Plymouth         | 1966        | 0.76<br>(0.62–0.9)  |
| Plymouth         | 1967        | 0.75<br>(0.6–0.9)   |
| Plymouth         | 1968        | 0.78<br>(0.63–0.95) |
| Plymouth         | 1969        | 0.8<br>(0.65–0.97)  |
| Plymouth         | 1970        | 0.83<br>(0.68–1.0)  |
| Plymouth         | 1971        | 0.86<br>(0.72–1.02) |
| Plymouth         | 1972        | 0.86<br>(0.73–1.02) |
| Plymouth         | 1973        | 0.87<br>(0.75–1.01) |
| Plymouth         | 1974        | 0.88<br>(0.77–1.01) |
| Plymouth         | 1975        | 0.89<br>(0.76–1.02) |
| Plymouth         | 1976        | 0.86<br>(0.73–1.0)  |
| Plymouth         | 1977        | 0.88<br>(0.75–1.03) |
| Plymouth         | 1978        | 0.93<br>(0.79–1.09) |
| Plymouth         | 1979        | 0.95<br>(0.83–1.09) |
| Plymouth         | 1980        | 0.94<br>(0.85–1.04) |
| Plymouth         | 1981        | 0.9<br>(0.82–0.98)  |
| Plymouth         | 1982        | 0.95<br>(0.88–1.02) |
| Plymouth         | 1983        | 0.96<br>(0.9–1.03)  |
| Plymouth         | 1984        | 0.95<br>(0.88–1.01) |
| Plymouth         | 1985        | 0.97<br>(0.9–1.05)  |
| Plymouth         | 1986        | 1.02<br>(0.94–1.09) |
| Plymouth         | 1987        | 1.02<br>(0.96–1.1)  |
| Plymouth         | 1988        | 1.06<br>(0.98–1.14) |

**Table 15 Ratio of adjusted to unadjusted 5q0 values for scaled locations by year**

| <b>Geography</b> | <b>Year</b> | <b>Ratio</b>        |
|------------------|-------------|---------------------|
| Plymouth         | 1989        | 1.02<br>(0.95–1.11) |
| Plymouth         | 1990        | 0.99<br>(0.92–1.07) |
| Plymouth         | 1991        | 0.96<br>(0.88–1.04) |
| Plymouth         | 1992        | 0.92<br>(0.84–0.99) |
| Plymouth         | 1993        | 0.94<br>(0.87–1.01) |
| Plymouth         | 1994        | 0.95<br>(0.88–1.03) |
| Plymouth         | 1995        | 0.97<br>(0.89–1.05) |
| Plymouth         | 1996        | 1.01<br>(0.92–1.1)  |
| Plymouth         | 1997        | 1.0<br>(0.91–1.09)  |
| Plymouth         | 1998        | 0.98<br>(0.89–1.08) |
| Plymouth         | 1999        | 1.0<br>(0.91–1.11)  |
| Plymouth         | 2000        | 1.0<br>(0.9–1.12)   |
| Plymouth         | 2001        | 1.0<br>(0.91–1.11)  |
| Plymouth         | 2002        | 0.99<br>(0.9–1.09)  |
| Plymouth         | 2003        | 1.03<br>(0.93–1.14) |
| Plymouth         | 2004        | 1.02<br>(0.9–1.14)  |
| Plymouth         | 2005        | 1.02<br>(0.91–1.14) |
| Plymouth         | 2006        | 1.04<br>(0.93–1.18) |
| Plymouth         | 2007        | 1.04<br>(0.93–1.17) |
| Plymouth         | 2008        | 1.03<br>(0.91–1.16) |
| Plymouth         | 2009        | 1.01<br>(0.91–1.12) |
| Plymouth         | 2010        | 0.97<br>(0.89–1.06) |
| Plymouth         | 2011        | 1.0<br>(0.92–1.1)   |
| Plymouth         | 2012        | 1.01<br>(0.92–1.1)  |
| Plymouth         | 2013        | 0.99<br>(0.89–1.09) |
| Plymouth         | 2014        | 0.97<br>(0.87–1.08) |
| Plymouth         | 2015        | 0.99<br>(0.88–1.1)  |
| Plymouth         | 2016        | 0.96<br>(0.87–1.06) |
| Plymouth         | 2017        | 0.99<br>(0.85–1.15) |
| Poole            | 1950        | 0.7<br>(0.58–0.84)  |
| Poole            | 1951        | 0.81<br>(0.67–0.97) |

**Table 15 Ratio of adjusted to unadjusted 5q0 values for scaled locations by year**

| <b>Geography</b> | <b>Year</b> | <b>Ratio</b>        |
|------------------|-------------|---------------------|
| Poole            | 1952        | 0.76<br>(0.63–0.91) |
| Poole            | 1953        | 0.77<br>(0.63–0.92) |
| Poole            | 1954        | 0.72<br>(0.6–0.87)  |
| Poole            | 1955        | 0.72<br>(0.6–0.86)  |
| Poole            | 1956        | 0.71<br>(0.6–0.84)  |
| Poole            | 1957        | 0.72<br>(0.61–0.84) |
| Poole            | 1958        | 0.71<br>(0.61–0.81) |
| Poole            | 1959        | 0.71<br>(0.61–0.82) |
| Poole            | 1960        | 0.72<br>(0.62–0.85) |
| Poole            | 1961        | 0.74<br>(0.62–0.87) |
| Poole            | 1962        | 0.76<br>(0.64–0.91) |
| Poole            | 1963        | 0.77<br>(0.63–0.91) |
| Poole            | 1964        | 0.75<br>(0.61–0.89) |
| Poole            | 1965        | 0.73<br>(0.6–0.87)  |
| Poole            | 1966        | 0.76<br>(0.62–0.9)  |
| Poole            | 1967        | 0.75<br>(0.6–0.9)   |
| Poole            | 1968        | 0.78<br>(0.63–0.95) |
| Poole            | 1969        | 0.8<br>(0.65–0.97)  |
| Poole            | 1970        | 0.83<br>(0.68–1.0)  |
| Poole            | 1971        | 0.86<br>(0.72–1.02) |
| Poole            | 1972        | 0.86<br>(0.73–1.02) |
| Poole            | 1973        | 0.87<br>(0.75–1.01) |
| Poole            | 1974        | 0.88<br>(0.77–1.01) |
| Poole            | 1975        | 0.89<br>(0.76–1.02) |
| Poole            | 1976        | 0.86<br>(0.73–1.0)  |
| Poole            | 1977        | 0.88<br>(0.75–1.03) |
| Poole            | 1978        | 0.93<br>(0.79–1.09) |
| Poole            | 1979        | 0.95<br>(0.83–1.09) |
| Poole            | 1980        | 0.94<br>(0.85–1.04) |
| Poole            | 1981        | 0.9<br>(0.82–0.98)  |
| Poole            | 1982        | 0.95<br>(0.88–1.02) |

**Table 15 Ratio of adjusted to unadjusted 5q0 values for scaled locations by year**

| <b>Geography</b> | <b>Year</b> | <b>Ratio</b>        |
|------------------|-------------|---------------------|
| Poole            | 1983        | 0.96<br>(0.9–1.03)  |
| Poole            | 1984        | 0.95<br>(0.88–1.01) |
| Poole            | 1985        | 0.97<br>(0.9–1.05)  |
| Poole            | 1986        | 1.02<br>(0.94–1.09) |
| Poole            | 1987        | 1.02<br>(0.96–1.1)  |
| Poole            | 1988        | 1.06<br>(0.98–1.14) |
| Poole            | 1989        | 1.02<br>(0.95–1.11) |
| Poole            | 1990        | 0.99<br>(0.92–1.07) |
| Poole            | 1991        | 0.96<br>(0.88–1.04) |
| Poole            | 1992        | 0.92<br>(0.84–0.99) |
| Poole            | 1993        | 0.94<br>(0.87–1.01) |
| Poole            | 1994        | 0.95<br>(0.88–1.03) |
| Poole            | 1995        | 0.97<br>(0.89–1.05) |
| Poole            | 1996        | 1.01<br>(0.92–1.1)  |
| Poole            | 1997        | 1.0<br>(0.91–1.1)   |
| Poole            | 1998        | 0.98<br>(0.89–1.08) |
| Poole            | 1999        | 1.0<br>(0.91–1.11)  |
| Poole            | 2000        | 1.0<br>(0.9–1.12)   |
| Poole            | 2001        | 1.0<br>(0.91–1.11)  |
| Poole            | 2002        | 0.99<br>(0.9–1.09)  |
| Poole            | 2003        | 1.03<br>(0.93–1.14) |
| Poole            | 2004        | 1.02<br>(0.9–1.14)  |
| Poole            | 2005        | 1.02<br>(0.91–1.14) |
| Poole            | 2006        | 1.04<br>(0.93–1.18) |
| Poole            | 2007        | 1.04<br>(0.93–1.17) |
| Poole            | 2008        | 1.03<br>(0.91–1.16) |
| Poole            | 2009        | 1.01<br>(0.91–1.12) |
| Poole            | 2010        | 0.97<br>(0.89–1.06) |
| Poole            | 2011        | 1.0<br>(0.92–1.1)   |
| Poole            | 2012        | 1.01<br>(0.92–1.1)  |
| Poole            | 2013        | 0.99<br>(0.89–1.09) |

**Table 15 Ratio of adjusted to unadjusted 5q0 values for scaled locations by year**

| <b>Geography</b> | <b>Year</b> | <b>Ratio</b>        |
|------------------|-------------|---------------------|
| Poole            | 2014        | 0.97<br>(0.87–1.08) |
| Poole            | 2015        | 0.99<br>(0.88–1.1)  |
| Poole            | 2016        | 0.96<br>(0.87–1.06) |
| Poole            | 2017        | 0.99<br>(0.85–1.15) |
| Somerset         | 1950        | 0.7<br>(0.58–0.84)  |
| Somerset         | 1951        | 0.81<br>(0.67–0.97) |
| Somerset         | 1952        | 0.76<br>(0.63–0.91) |
| Somerset         | 1953        | 0.77<br>(0.63–0.92) |
| Somerset         | 1954        | 0.72<br>(0.6–0.87)  |
| Somerset         | 1955        | 0.72<br>(0.6–0.86)  |
| Somerset         | 1956        | 0.71<br>(0.6–0.84)  |
| Somerset         | 1957        | 0.72<br>(0.61–0.84) |
| Somerset         | 1958        | 0.71<br>(0.61–0.81) |
| Somerset         | 1959        | 0.71<br>(0.61–0.82) |
| Somerset         | 1960        | 0.72<br>(0.62–0.85) |
| Somerset         | 1961        | 0.74<br>(0.62–0.87) |
| Somerset         | 1962        | 0.76<br>(0.64–0.91) |
| Somerset         | 1963        | 0.77<br>(0.63–0.91) |
| Somerset         | 1964        | 0.75<br>(0.61–0.89) |
| Somerset         | 1965        | 0.73<br>(0.6–0.87)  |
| Somerset         | 1966        | 0.76<br>(0.62–0.9)  |
| Somerset         | 1967        | 0.75<br>(0.6–0.9)   |
| Somerset         | 1968        | 0.78<br>(0.63–0.95) |
| Somerset         | 1969        | 0.8<br>(0.65–0.97)  |
| Somerset         | 1970        | 0.83<br>(0.68–1.0)  |
| Somerset         | 1971        | 0.86<br>(0.72–1.02) |
| Somerset         | 1972        | 0.86<br>(0.73–1.02) |
| Somerset         | 1973        | 0.87<br>(0.75–1.01) |
| Somerset         | 1974        | 0.88<br>(0.77–1.01) |
| Somerset         | 1975        | 0.89<br>(0.76–1.02) |
| Somerset         | 1976        | 0.86<br>(0.73–1.0)  |

**Table 15 Ratio of adjusted to unadjusted 5q0 values for scaled locations by year**

| <b>Geography</b> | <b>Year</b> | <b>Ratio</b>        |
|------------------|-------------|---------------------|
| Somerset         | 1977        | 0.88<br>(0.75–1.03) |
| Somerset         | 1978        | 0.93<br>(0.79–1.09) |
| Somerset         | 1979        | 0.95<br>(0.83–1.09) |
| Somerset         | 1980        | 0.94<br>(0.85–1.04) |
| Somerset         | 1981        | 0.9<br>(0.82–0.98)  |
| Somerset         | 1982        | 0.95<br>(0.88–1.02) |
| Somerset         | 1983        | 0.96<br>(0.9–1.03)  |
| Somerset         | 1984        | 0.95<br>(0.88–1.01) |
| Somerset         | 1985        | 0.97<br>(0.9–1.05)  |
| Somerset         | 1986        | 1.02<br>(0.94–1.09) |
| Somerset         | 1987        | 1.02<br>(0.96–1.1)  |
| Somerset         | 1988        | 1.06<br>(0.98–1.14) |
| Somerset         | 1989        | 1.02<br>(0.95–1.11) |
| Somerset         | 1990        | 0.99<br>(0.92–1.07) |
| Somerset         | 1991        | 0.96<br>(0.88–1.04) |
| Somerset         | 1992        | 0.92<br>(0.84–0.99) |
| Somerset         | 1993        | 0.94<br>(0.87–1.01) |
| Somerset         | 1994        | 0.95<br>(0.88–1.03) |
| Somerset         | 1995        | 0.97<br>(0.89–1.05) |
| Somerset         | 1996        | 1.01<br>(0.92–1.1)  |
| Somerset         | 1997        | 1.0<br>(0.91–1.1)   |
| Somerset         | 1998        | 0.98<br>(0.89–1.08) |
| Somerset         | 1999        | 1.0<br>(0.91–1.11)  |
| Somerset         | 2000        | 1.0<br>(0.9–1.12)   |
| Somerset         | 2001        | 1.0<br>(0.91–1.11)  |
| Somerset         | 2002        | 0.99<br>(0.9–1.09)  |
| Somerset         | 2003        | 1.03<br>(0.93–1.14) |
| Somerset         | 2004        | 1.02<br>(0.9–1.14)  |
| Somerset         | 2005        | 1.02<br>(0.91–1.14) |
| Somerset         | 2006        | 1.04<br>(0.93–1.18) |
| Somerset         | 2007        | 1.04<br>(0.93–1.17) |



**Table 15 Ratio of adjusted to unadjusted 5q0 values for scaled locations by year**

| <b>Geography</b>      | <b>Year</b> | <b>Ratio</b>        |
|-----------------------|-------------|---------------------|
| Somerset              | 2008        | 1.03<br>(0.91–1.16) |
| Somerset              | 2009        | 1.01<br>(0.91–1.12) |
| Somerset              | 2010        | 0.97<br>(0.89–1.06) |
| Somerset              | 2011        | 1.0<br>(0.92–1.1)   |
| Somerset              | 2012        | 1.01<br>(0.92–1.1)  |
| Somerset              | 2013        | 0.99<br>(0.89–1.09) |
| Somerset              | 2014        | 0.97<br>(0.87–1.08) |
| Somerset              | 2015        | 0.99<br>(0.88–1.1)  |
| Somerset              | 2016        | 0.96<br>(0.87–1.06) |
| Somerset              | 2017        | 0.99<br>(0.85–1.15) |
| South Gloucestershire | 1950        | 0.7<br>(0.58–0.84)  |
| South Gloucestershire | 1951        | 0.81<br>(0.67–0.97) |
| South Gloucestershire | 1952        | 0.76<br>(0.63–0.91) |
| South Gloucestershire | 1953        | 0.77<br>(0.63–0.92) |
| South Gloucestershire | 1954        | 0.72<br>(0.6–0.87)  |
| South Gloucestershire | 1955        | 0.72<br>(0.6–0.86)  |
| South Gloucestershire | 1956        | 0.71<br>(0.6–0.84)  |
| South Gloucestershire | 1957        | 0.72<br>(0.61–0.84) |
| South Gloucestershire | 1958        | 0.71<br>(0.61–0.81) |
| South Gloucestershire | 1959        | 0.71<br>(0.61–0.82) |
| South Gloucestershire | 1960        | 0.72<br>(0.62–0.85) |
| South Gloucestershire | 1961        | 0.74<br>(0.62–0.87) |
| South Gloucestershire | 1962        | 0.76<br>(0.64–0.91) |
| South Gloucestershire | 1963        | 0.77<br>(0.63–0.91) |
| South Gloucestershire | 1964        | 0.75<br>(0.61–0.89) |
| South Gloucestershire | 1965        | 0.73<br>(0.6–0.87)  |
| South Gloucestershire | 1966        | 0.76<br>(0.62–0.9)  |
| South Gloucestershire | 1967        | 0.75<br>(0.6–0.9)   |
| South Gloucestershire | 1968        | 0.78<br>(0.63–0.95) |
| South Gloucestershire | 1969        | 0.8<br>(0.65–0.97)  |
| South Gloucestershire | 1970        | 0.83<br>(0.68–1.0)  |

**Table 15 Ratio of adjusted to unadjusted 5q0 values for scaled locations by year**

| <b>Geography</b>      | <b>Year</b> | <b>Ratio</b>        |
|-----------------------|-------------|---------------------|
| South Gloucestershire | 1971        | 0.86<br>(0.72–1.02) |
| South Gloucestershire | 1972        | 0.86<br>(0.73–1.02) |
| South Gloucestershire | 1973        | 0.87<br>(0.75–1.01) |
| South Gloucestershire | 1974        | 0.88<br>(0.77–1.01) |
| South Gloucestershire | 1975        | 0.89<br>(0.76–1.02) |
| South Gloucestershire | 1976        | 0.86<br>(0.73–1.0)  |
| South Gloucestershire | 1977        | 0.88<br>(0.75–1.03) |
| South Gloucestershire | 1978        | 0.93<br>(0.79–1.09) |
| South Gloucestershire | 1979        | 0.95<br>(0.83–1.09) |
| South Gloucestershire | 1980        | 0.94<br>(0.84–1.04) |
| South Gloucestershire | 1981        | 0.9<br>(0.82–0.98)  |
| South Gloucestershire | 1982        | 0.95<br>(0.88–1.02) |
| South Gloucestershire | 1983        | 0.96<br>(0.9–1.03)  |
| South Gloucestershire | 1984        | 0.95<br>(0.88–1.01) |
| South Gloucestershire | 1985        | 0.97<br>(0.9–1.05)  |
| South Gloucestershire | 1986        | 1.02<br>(0.94–1.09) |
| South Gloucestershire | 1987        | 1.02<br>(0.96–1.1)  |
| South Gloucestershire | 1988        | 1.06<br>(0.98–1.14) |
| South Gloucestershire | 1989        | 1.02<br>(0.95–1.11) |
| South Gloucestershire | 1990        | 0.99<br>(0.92–1.07) |
| South Gloucestershire | 1991        | 0.96<br>(0.88–1.04) |
| South Gloucestershire | 1992        | 0.92<br>(0.84–0.99) |
| South Gloucestershire | 1993        | 0.94<br>(0.87–1.01) |
| South Gloucestershire | 1994        | 0.95<br>(0.88–1.03) |
| South Gloucestershire | 1995        | 0.97<br>(0.89–1.05) |
| South Gloucestershire | 1996        | 1.01<br>(0.92–1.1)  |
| South Gloucestershire | 1997        | 1.0<br>(0.91–1.1)   |
| South Gloucestershire | 1998        | 0.98<br>(0.89–1.08) |
| South Gloucestershire | 1999        | 1.0<br>(0.91–1.11)  |
| South Gloucestershire | 2000        | 1.0<br>(0.9–1.12)   |
| South Gloucestershire | 2001        | 1.0<br>(0.91–1.11)  |

**Table 15 Ratio of adjusted to unadjusted 5q0 values for scaled locations by year**

| <b>Geography</b>      | <b>Year</b> | <b>Ratio</b>        |
|-----------------------|-------------|---------------------|
| South Gloucestershire | 2002        | 0.99<br>(0.9–1.09)  |
| South Gloucestershire | 2003        | 1.03<br>(0.93–1.14) |
| South Gloucestershire | 2004        | 1.02<br>(0.9–1.14)  |
| South Gloucestershire | 2005        | 1.02<br>(0.91–1.14) |
| South Gloucestershire | 2006        | 1.04<br>(0.93–1.18) |
| South Gloucestershire | 2007        | 1.04<br>(0.93–1.17) |
| South Gloucestershire | 2008        | 1.03<br>(0.91–1.16) |
| South Gloucestershire | 2009        | 1.01<br>(0.91–1.12) |
| South Gloucestershire | 2010        | 0.97<br>(0.89–1.06) |
| South Gloucestershire | 2011        | 1.0<br>(0.92–1.1)   |
| South Gloucestershire | 2012        | 1.01<br>(0.92–1.1)  |
| South Gloucestershire | 2013        | 0.99<br>(0.89–1.09) |
| South Gloucestershire | 2014        | 0.97<br>(0.87–1.08) |
| South Gloucestershire | 2015        | 0.99<br>(0.88–1.1)  |
| South Gloucestershire | 2016        | 0.96<br>(0.87–1.06) |
| South Gloucestershire | 2017        | 0.99<br>(0.85–1.15) |
| Swindon               | 1950        | 0.7<br>(0.58–0.84)  |
| Swindon               | 1951        | 0.81<br>(0.67–0.97) |
| Swindon               | 1952        | 0.76<br>(0.63–0.91) |
| Swindon               | 1953        | 0.77<br>(0.63–0.92) |
| Swindon               | 1954        | 0.72<br>(0.6–0.87)  |
| Swindon               | 1955        | 0.72<br>(0.6–0.86)  |
| Swindon               | 1956        | 0.71<br>(0.6–0.84)  |
| Swindon               | 1957        | 0.72<br>(0.61–0.84) |
| Swindon               | 1958        | 0.71<br>(0.62–0.81) |
| Swindon               | 1959        | 0.71<br>(0.61–0.82) |
| Swindon               | 1960        | 0.73<br>(0.62–0.85) |
| Swindon               | 1961        | 0.74<br>(0.62–0.87) |
| Swindon               | 1962        | 0.76<br>(0.64–0.91) |
| Swindon               | 1963        | 0.77<br>(0.64–0.91) |
| Swindon               | 1964        | 0.75<br>(0.62–0.89) |

**Table 15 Ratio of adjusted to unadjusted 5q0 values for scaled locations by year**

| <b>Geography</b> | <b>Year</b> | <b>Ratio</b>        |
|------------------|-------------|---------------------|
| Swindon          | 1965        | 0.73<br>(0.6–0.87)  |
| Swindon          | 1966        | 0.76<br>(0.62–0.9)  |
| Swindon          | 1967        | 0.75<br>(0.6–0.9)   |
| Swindon          | 1968        | 0.78<br>(0.63–0.95) |
| Swindon          | 1969        | 0.8<br>(0.65–0.97)  |
| Swindon          | 1970        | 0.83<br>(0.69–1.0)  |
| Swindon          | 1971        | 0.86<br>(0.72–1.02) |
| Swindon          | 1972        | 0.86<br>(0.73–1.02) |
| Swindon          | 1973        | 0.87<br>(0.75–1.01) |
| Swindon          | 1974        | 0.88<br>(0.77–1.01) |
| Swindon          | 1975        | 0.89<br>(0.76–1.02) |
| Swindon          | 1976        | 0.86<br>(0.73–1.0)  |
| Swindon          | 1977        | 0.88<br>(0.75–1.03) |
| Swindon          | 1978        | 0.93<br>(0.79–1.09) |
| Swindon          | 1979        | 0.96<br>(0.83–1.09) |
| Swindon          | 1980        | 0.94<br>(0.85–1.04) |
| Swindon          | 1981        | 0.9<br>(0.82–0.98)  |
| Swindon          | 1982        | 0.95<br>(0.88–1.02) |
| Swindon          | 1983        | 0.96<br>(0.9–1.03)  |
| Swindon          | 1984        | 0.95<br>(0.88–1.01) |
| Swindon          | 1985        | 0.97<br>(0.9–1.05)  |
| Swindon          | 1986        | 1.02<br>(0.94–1.09) |
| Swindon          | 1987        | 1.02<br>(0.96–1.1)  |
| Swindon          | 1988        | 1.06<br>(0.98–1.14) |
| Swindon          | 1989        | 1.02<br>(0.95–1.11) |
| Swindon          | 1990        | 0.99<br>(0.92–1.07) |
| Swindon          | 1991        | 0.96<br>(0.88–1.04) |
| Swindon          | 1992        | 0.92<br>(0.84–0.99) |
| Swindon          | 1993        | 0.94<br>(0.87–1.01) |
| Swindon          | 1994        | 0.95<br>(0.88–1.03) |
| Swindon          | 1995        | 0.97<br>(0.89–1.05) |

**Table 15 Ratio of adjusted to unadjusted 5q0 values for scaled locations by year**

| <b>Geography</b> | <b>Year</b> | <b>Ratio</b>        |
|------------------|-------------|---------------------|
| Swindon          | 1996        | 1.01<br>(0.92–1.1)  |
| Swindon          | 1997        | 1.0<br>(0.91–1.09)  |
| Swindon          | 1998        | 0.98<br>(0.89–1.08) |
| Swindon          | 1999        | 1.0<br>(0.91–1.11)  |
| Swindon          | 2000        | 1.0<br>(0.9–1.12)   |
| Swindon          | 2001        | 1.0<br>(0.91–1.11)  |
| Swindon          | 2002        | 0.99<br>(0.9–1.09)  |
| Swindon          | 2003        | 1.03<br>(0.93–1.14) |
| Swindon          | 2004        | 1.02<br>(0.9–1.14)  |
| Swindon          | 2005        | 1.02<br>(0.91–1.14) |
| Swindon          | 2006        | 1.04<br>(0.93–1.18) |
| Swindon          | 2007        | 1.04<br>(0.93–1.17) |
| Swindon          | 2008        | 1.03<br>(0.91–1.16) |
| Swindon          | 2009        | 1.01<br>(0.91–1.12) |
| Swindon          | 2010        | 0.97<br>(0.89–1.06) |
| Swindon          | 2011        | 1.0<br>(0.92–1.1)   |
| Swindon          | 2012        | 1.01<br>(0.92–1.1)  |
| Swindon          | 2013        | 0.99<br>(0.89–1.09) |
| Swindon          | 2014        | 0.97<br>(0.87–1.08) |
| Swindon          | 2015        | 0.99<br>(0.88–1.1)  |
| Swindon          | 2016        | 0.96<br>(0.87–1.06) |
| Swindon          | 2017        | 0.99<br>(0.85–1.15) |
| Torbay           | 1950        | 0.7<br>(0.58–0.84)  |
| Torbay           | 1951        | 0.81<br>(0.67–0.97) |
| Torbay           | 1952        | 0.76<br>(0.63–0.91) |
| Torbay           | 1953        | 0.77<br>(0.63–0.92) |
| Torbay           | 1954        | 0.72<br>(0.6–0.87)  |
| Torbay           | 1955        | 0.72<br>(0.6–0.86)  |
| Torbay           | 1956        | 0.71<br>(0.6–0.84)  |
| Torbay           | 1957        | 0.72<br>(0.61–0.84) |
| Torbay           | 1958        | 0.71<br>(0.61–0.81) |

**Table 15 Ratio of adjusted to unadjusted 5q0 values for scaled locations by year**

| <b>Geography</b> | <b>Year</b> | <b>Ratio</b>        |
|------------------|-------------|---------------------|
| Torbay           | 1959        | 0.71<br>(0.61–0.82) |
| Torbay           | 1960        | 0.72<br>(0.62–0.85) |
| Torbay           | 1961        | 0.74<br>(0.62–0.87) |
| Torbay           | 1962        | 0.76<br>(0.64–0.91) |
| Torbay           | 1963        | 0.77<br>(0.63–0.91) |
| Torbay           | 1964        | 0.75<br>(0.61–0.89) |
| Torbay           | 1965        | 0.73<br>(0.6–0.87)  |
| Torbay           | 1966        | 0.76<br>(0.62–0.9)  |
| Torbay           | 1967        | 0.75<br>(0.6–0.9)   |
| Torbay           | 1968        | 0.78<br>(0.63–0.95) |
| Torbay           | 1969        | 0.8<br>(0.65–0.97)  |
| Torbay           | 1970        | 0.83<br>(0.68–1.0)  |
| Torbay           | 1971        | 0.86<br>(0.72–1.02) |
| Torbay           | 1972        | 0.86<br>(0.73–1.02) |
| Torbay           | 1973        | 0.87<br>(0.75–1.01) |
| Torbay           | 1974        | 0.88<br>(0.77–1.01) |
| Torbay           | 1975        | 0.89<br>(0.76–1.02) |
| Torbay           | 1976        | 0.86<br>(0.73–1.0)  |
| Torbay           | 1977        | 0.88<br>(0.75–1.03) |
| Torbay           | 1978        | 0.93<br>(0.79–1.09) |
| Torbay           | 1979        | 0.95<br>(0.83–1.09) |
| Torbay           | 1980        | 0.94<br>(0.85–1.04) |
| Torbay           | 1981        | 0.9<br>(0.82–0.98)  |
| Torbay           | 1982        | 0.95<br>(0.88–1.02) |
| Torbay           | 1983        | 0.96<br>(0.9–1.03)  |
| Torbay           | 1984        | 0.95<br>(0.88–1.01) |
| Torbay           | 1985        | 0.97<br>(0.9–1.05)  |
| Torbay           | 1986        | 1.02<br>(0.94–1.09) |
| Torbay           | 1987        | 1.02<br>(0.96–1.1)  |
| Torbay           | 1988        | 1.06<br>(0.98–1.14) |
| Torbay           | 1989        | 1.02<br>(0.95–1.11) |

**Table 15 Ratio of adjusted to unadjusted 5q0 values for scaled locations by year**

| <b>Geography</b> | <b>Year</b> | <b>Ratio</b>        |
|------------------|-------------|---------------------|
| Torbay           | 1990        | 0.99<br>(0.92–1.07) |
| Torbay           | 1991        | 0.96<br>(0.88–1.04) |
| Torbay           | 1992        | 0.92<br>(0.84–0.99) |
| Torbay           | 1993        | 0.94<br>(0.87–1.01) |
| Torbay           | 1994        | 0.95<br>(0.88–1.03) |
| Torbay           | 1995        | 0.97<br>(0.89–1.05) |
| Torbay           | 1996        | 1.01<br>(0.92–1.1)  |
| Torbay           | 1997        | 1.0<br>(0.91–1.1)   |
| Torbay           | 1998        | 0.98<br>(0.89–1.08) |
| Torbay           | 1999        | 1.0<br>(0.91–1.11)  |
| Torbay           | 2000        | 1.0<br>(0.9–1.12)   |
| Torbay           | 2001        | 1.0<br>(0.91–1.11)  |
| Torbay           | 2002        | 0.99<br>(0.9–1.09)  |
| Torbay           | 2003        | 1.03<br>(0.93–1.14) |
| Torbay           | 2004        | 1.02<br>(0.9–1.14)  |
| Torbay           | 2005        | 1.02<br>(0.91–1.14) |
| Torbay           | 2006        | 1.04<br>(0.93–1.18) |
| Torbay           | 2007        | 1.04<br>(0.93–1.17) |
| Torbay           | 2008        | 1.03<br>(0.91–1.16) |
| Torbay           | 2009        | 1.01<br>(0.91–1.12) |
| Torbay           | 2010        | 0.97<br>(0.89–1.06) |
| Torbay           | 2011        | 1.0<br>(0.92–1.1)   |
| Torbay           | 2012        | 1.01<br>(0.92–1.1)  |
| Torbay           | 2013        | 0.99<br>(0.89–1.09) |
| Torbay           | 2014        | 0.97<br>(0.87–1.08) |
| Torbay           | 2015        | 0.99<br>(0.88–1.1)  |
| Torbay           | 2016        | 0.96<br>(0.87–1.06) |
| Torbay           | 2017        | 0.99<br>(0.85–1.15) |
| Wiltshire        | 1950        | 0.7<br>(0.58–0.84)  |
| Wiltshire        | 1951        | 0.81<br>(0.67–0.97) |
| Wiltshire        | 1952        | 0.76<br>(0.63–0.91) |

**Table 15 Ratio of adjusted to unadjusted 5q0 values for scaled locations by year**

| <b>Geography</b> | <b>Year</b> | <b>Ratio</b>        |
|------------------|-------------|---------------------|
| Wiltshire        | 1953        | 0.77<br>(0.63–0.92) |
| Wiltshire        | 1954        | 0.72<br>(0.6–0.87)  |
| Wiltshire        | 1955        | 0.72<br>(0.6–0.86)  |
| Wiltshire        | 1956        | 0.71<br>(0.6–0.84)  |
| Wiltshire        | 1957        | 0.72<br>(0.61–0.84) |
| Wiltshire        | 1958        | 0.71<br>(0.61–0.81) |
| Wiltshire        | 1959        | 0.71<br>(0.61–0.82) |
| Wiltshire        | 1960        | 0.72<br>(0.62–0.85) |
| Wiltshire        | 1961        | 0.74<br>(0.62–0.87) |
| Wiltshire        | 1962        | 0.76<br>(0.64–0.91) |
| Wiltshire        | 1963        | 0.77<br>(0.63–0.91) |
| Wiltshire        | 1964        | 0.75<br>(0.61–0.89) |
| Wiltshire        | 1965        | 0.73<br>(0.6–0.87)  |
| Wiltshire        | 1966        | 0.76<br>(0.62–0.9)  |
| Wiltshire        | 1967        | 0.75<br>(0.6–0.9)   |
| Wiltshire        | 1968        | 0.78<br>(0.63–0.95) |
| Wiltshire        | 1969        | 0.8<br>(0.65–0.97)  |
| Wiltshire        | 1970        | 0.83<br>(0.68–1.0)  |
| Wiltshire        | 1971        | 0.86<br>(0.72–1.02) |
| Wiltshire        | 1972        | 0.86<br>(0.73–1.02) |
| Wiltshire        | 1973        | 0.87<br>(0.75–1.01) |
| Wiltshire        | 1974        | 0.88<br>(0.77–1.01) |
| Wiltshire        | 1975        | 0.89<br>(0.76–1.02) |
| Wiltshire        | 1976        | 0.86<br>(0.73–1.0)  |
| Wiltshire        | 1977        | 0.88<br>(0.75–1.03) |
| Wiltshire        | 1978        | 0.93<br>(0.79–1.09) |
| Wiltshire        | 1979        | 0.95<br>(0.83–1.09) |
| Wiltshire        | 1980        | 0.94<br>(0.85–1.04) |
| Wiltshire        | 1981        | 0.9<br>(0.82–0.98)  |
| Wiltshire        | 1982        | 0.95<br>(0.88–1.02) |
| Wiltshire        | 1983        | 0.96<br>(0.9–1.03)  |



**Table 15 Ratio of adjusted to unadjusted 5q0 values for scaled locations by year**

| <b>Geography</b> | <b>Year</b> | <b>Ratio</b>        |
|------------------|-------------|---------------------|
| Wiltshire        | 1984        | 0.95<br>(0.88–1.01) |
| Wiltshire        | 1985        | 0.97<br>(0.9–1.05)  |
| Wiltshire        | 1986        | 1.02<br>(0.94–1.09) |
| Wiltshire        | 1987        | 1.02<br>(0.96–1.1)  |
| Wiltshire        | 1988        | 1.06<br>(0.98–1.14) |
| Wiltshire        | 1989        | 1.02<br>(0.95–1.11) |
| Wiltshire        | 1990        | 0.99<br>(0.92–1.07) |
| Wiltshire        | 1991        | 0.96<br>(0.88–1.04) |
| Wiltshire        | 1992        | 0.92<br>(0.84–0.99) |
| Wiltshire        | 1993        | 0.94<br>(0.87–1.01) |
| Wiltshire        | 1994        | 0.95<br>(0.88–1.03) |
| Wiltshire        | 1995        | 0.97<br>(0.89–1.05) |
| Wiltshire        | 1996        | 1.01<br>(0.92–1.1)  |
| Wiltshire        | 1997        | 1.0<br>(0.91–1.1)   |
| Wiltshire        | 1998        | 0.98<br>(0.89–1.08) |
| Wiltshire        | 1999        | 1.0<br>(0.91–1.11)  |
| Wiltshire        | 2000        | 1.0<br>(0.9–1.12)   |
| Wiltshire        | 2001        | 1.0<br>(0.91–1.11)  |
| Wiltshire        | 2002        | 0.99<br>(0.9–1.09)  |
| Wiltshire        | 2003        | 1.03<br>(0.93–1.14) |
| Wiltshire        | 2004        | 1.02<br>(0.9–1.14)  |
| Wiltshire        | 2005        | 1.02<br>(0.91–1.14) |
| Wiltshire        | 2006        | 1.04<br>(0.93–1.18) |
| Wiltshire        | 2007        | 1.04<br>(0.93–1.17) |
| Wiltshire        | 2008        | 1.03<br>(0.91–1.16) |
| Wiltshire        | 2009        | 1.01<br>(0.91–1.12) |
| Wiltshire        | 2010        | 0.97<br>(0.89–1.06) |
| Wiltshire        | 2011        | 1.0<br>(0.92–1.1)   |
| Wiltshire        | 2012        | 1.01<br>(0.92–1.1)  |
| Wiltshire        | 2013        | 0.99<br>(0.89–1.09) |
| Wiltshire        | 2014        | 0.97<br>(0.87–1.08) |

**Table 15 Ratio of adjusted to unadjusted 5q0 values for scaled locations by year**

| <b>Geography</b> | <b>Year</b> | <b>Ratio</b>        |
|------------------|-------------|---------------------|
| Wiltshire        | 2015        | 0.99<br>(0.88–1.1)  |
| Wiltshire        | 2016        | 0.96<br>(0.87–1.06) |
| Wiltshire        | 2017        | 0.99<br>(0.85–1.15) |
| West Midlands    | 1950        | 0.9<br>(0.74–1.08)  |
| West Midlands    | 1951        | 1.04<br>(0.85–1.25) |
| West Midlands    | 1952        | 0.97<br>(0.8–1.17)  |
| West Midlands    | 1953        | 0.98<br>(0.81–1.17) |
| West Midlands    | 1954        | 0.91<br>(0.75–1.1)  |
| West Midlands    | 1955        | 0.91<br>(0.74–1.11) |
| West Midlands    | 1956        | 0.89<br>(0.73–1.09) |
| West Midlands    | 1957        | 0.9<br>(0.73–1.1)   |
| West Midlands    | 1958        | 0.88<br>(0.71–1.07) |
| West Midlands    | 1959        | 0.87<br>(0.71–1.06) |
| West Midlands    | 1960        | 0.88<br>(0.71–1.06) |
| West Midlands    | 1961        | 0.89<br>(0.72–1.07) |
| West Midlands    | 1962        | 0.91<br>(0.74–1.09) |
| West Midlands    | 1963        | 0.91<br>(0.75–1.09) |
| West Midlands    | 1964        | 0.88<br>(0.72–1.05) |
| West Midlands    | 1965        | 0.85<br>(0.69–1.02) |
| West Midlands    | 1966        | 0.87<br>(0.71–1.04) |
| West Midlands    | 1967        | 0.85<br>(0.69–1.02) |
| West Midlands    | 1968        | 0.88<br>(0.72–1.05) |
| West Midlands    | 1969        | 0.89<br>(0.73–1.06) |
| West Midlands    | 1970        | 0.91<br>(0.76–1.08) |
| West Midlands    | 1971        | 0.93<br>(0.78–1.1)  |
| West Midlands    | 1972        | 0.93<br>(0.78–1.11) |
| West Midlands    | 1973        | 0.93<br>(0.78–1.12) |
| West Midlands    | 1974        | 0.94<br>(0.79–1.11) |
| West Midlands    | 1975        | 0.93<br>(0.79–1.1)  |
| West Midlands    | 1976        | 0.9<br>(0.77–1.04)  |
| West Midlands    | 1977        | 0.92<br>(0.8–1.04)  |

**Table 15 Ratio of adjusted to unadjusted 5q0 values for scaled locations by year**

| <b>Geography</b> | <b>Year</b> | <b>Ratio</b>        |
|------------------|-------------|---------------------|
| West Midlands    | 1978        | 0.96<br>(0.85–1.08) |
| West Midlands    | 1979        | 0.98<br>(0.9–1.08)  |
| West Midlands    | 1980        | 0.97<br>(0.9–1.04)  |
| West Midlands    | 1981        | 0.93<br>(0.89–0.97) |
| West Midlands    | 1982        | 0.98<br>(0.95–1.01) |
| West Midlands    | 1983        | 1.0<br>(0.97–1.03)  |
| West Midlands    | 1984        | 0.98<br>(0.95–1.01) |
| West Midlands    | 1985        | 0.99<br>(0.95–1.02) |
| West Midlands    | 1986        | 0.99<br>(0.97–1.02) |
| West Midlands    | 1987        | 0.99<br>(0.96–1.01) |
| West Midlands    | 1988        | 1.0<br>(0.97–1.03)  |
| West Midlands    | 1989        | 0.99<br>(0.97–1.01) |
| West Midlands    | 1990        | 1.0<br>(0.98–1.02)  |
| West Midlands    | 1991        | 1.0<br>(0.98–1.02)  |
| West Midlands    | 1992        | 0.97<br>(0.95–1.0)  |
| West Midlands    | 1993        | 1.0<br>(0.97–1.02)  |
| West Midlands    | 1994        | 1.01<br>(0.98–1.04) |
| West Midlands    | 1995        | 1.02<br>(0.99–1.05) |
| West Midlands    | 1996        | 1.04<br>(1.01–1.06) |
| West Midlands    | 1997        | 1.01<br>(0.97–1.05) |
| West Midlands    | 1998        | 1.0<br>(0.96–1.03)  |
| West Midlands    | 1999        | 1.02<br>(0.99–1.06) |
| West Midlands    | 2000        | 1.01<br>(0.95–1.09) |
| West Midlands    | 2001        | 1.0<br>(0.96–1.04)  |
| West Midlands    | 2002        | 0.98<br>(0.95–1.02) |
| West Midlands    | 2003        | 1.02<br>(0.98–1.06) |
| West Midlands    | 2004        | 0.99<br>(0.96–1.02) |
| West Midlands    | 2005        | 0.99<br>(0.95–1.03) |
| West Midlands    | 2006        | 1.01<br>(0.97–1.05) |
| West Midlands    | 2007        | 1.01<br>(0.98–1.05) |
| West Midlands    | 2008        | 1.01<br>(0.98–1.04) |

**Table 15 Ratio of adjusted to unadjusted 5q0 values for scaled locations by year**

| <b>Geography</b> | <b>Year</b> | <b>Ratio</b>        |
|------------------|-------------|---------------------|
| West Midlands    | 2009        | 1.0<br>(0.96–1.04)  |
| West Midlands    | 2010        | 0.98<br>(0.95–1.02) |
| West Midlands    | 2011        | 1.0<br>(0.96–1.04)  |
| West Midlands    | 2012        | 1.0<br>(0.96–1.04)  |
| West Midlands    | 2013        | 0.99<br>(0.95–1.02) |
| West Midlands    | 2014        | 0.99<br>(0.95–1.03) |
| West Midlands    | 2015        | 1.0<br>(0.96–1.04)  |
| West Midlands    | 2016        | 1.0<br>(0.94–1.05)  |
| West Midlands    | 2017        | 1.02<br>(0.92–1.14) |
| Birmingham       | 1950        | 0.55<br>(0.46–0.66) |
| Birmingham       | 1951        | 0.65<br>(0.53–0.77) |
| Birmingham       | 1952        | 0.61<br>(0.5–0.72)  |
| Birmingham       | 1953        | 0.61<br>(0.51–0.73) |
| Birmingham       | 1954        | 0.58<br>(0.48–0.69) |
| Birmingham       | 1955        | 0.58<br>(0.49–0.69) |
| Birmingham       | 1956        | 0.58<br>(0.48–0.69) |
| Birmingham       | 1957        | 0.59<br>(0.5–0.7)   |
| Birmingham       | 1958        | 0.59<br>(0.49–0.69) |
| Birmingham       | 1959        | 0.59<br>(0.5–0.7)   |
| Birmingham       | 1960        | 0.61<br>(0.51–0.72) |
| Birmingham       | 1961        | 0.62<br>(0.52–0.74) |
| Birmingham       | 1962        | 0.65<br>(0.54–0.78) |
| Birmingham       | 1963        | 0.66<br>(0.55–0.79) |
| Birmingham       | 1964        | 0.65<br>(0.53–0.78) |
| Birmingham       | 1965        | 0.64<br>(0.52–0.77) |
| Birmingham       | 1966        | 0.67<br>(0.55–0.79) |
| Birmingham       | 1967        | 0.66<br>(0.54–0.79) |
| Birmingham       | 1968        | 0.7<br>(0.57–0.83)  |
| Birmingham       | 1969        | 0.72<br>(0.59–0.86) |
| Birmingham       | 1970        | 0.75<br>(0.62–0.89) |
| Birmingham       | 1971        | 0.79<br>(0.66–0.93) |

**Table 15 Ratio of adjusted to unadjusted 5q0 values for scaled locations by year**

| <b>Geography</b> | <b>Year</b> | <b>Ratio</b>        |
|------------------|-------------|---------------------|
| Birmingham       | 1972        | 0.8<br>(0.68–0.93)  |
| Birmingham       | 1973        | 0.81<br>(0.7–0.93)  |
| Birmingham       | 1974        | 0.83<br>(0.72–0.95) |
| Birmingham       | 1975        | 0.84<br>(0.73–0.95) |
| Birmingham       | 1976        | 0.82<br>(0.72–0.93) |
| Birmingham       | 1977        | 0.85<br>(0.76–0.95) |
| Birmingham       | 1978        | 0.91<br>(0.82–1.0)  |
| Birmingham       | 1979        | 0.94<br>(0.86–1.02) |
| Birmingham       | 1980        | 0.93<br>(0.86–0.99) |
| Birmingham       | 1981        | 0.89<br>(0.83–0.94) |
| Birmingham       | 1982        | 0.95<br>(0.9–1.01)  |
| Birmingham       | 1983        | 0.97<br>(0.92–1.03) |
| Birmingham       | 1984        | 0.96<br>(0.91–1.02) |
| Birmingham       | 1985        | 0.96<br>(0.91–1.02) |
| Birmingham       | 1986        | 0.98<br>(0.92–1.04) |
| Birmingham       | 1987        | 0.99<br>(0.94–1.05) |
| Birmingham       | 1988        | 1.05<br>(1.0–1.11)  |
| Birmingham       | 1989        | 1.05<br>(0.99–1.1)  |
| Birmingham       | 1990        | 1.07<br>(1.02–1.13) |
| Birmingham       | 1991        | 1.02<br>(0.95–1.1)  |
| Birmingham       | 1992        | 0.95<br>(0.89–1.01) |
| Birmingham       | 1993        | 0.93<br>(0.86–1.0)  |
| Birmingham       | 1994        | 0.94<br>(0.87–1.01) |
| Birmingham       | 1995        | 0.95<br>(0.87–1.02) |
| Birmingham       | 1996        | 0.98<br>(0.9–1.05)  |
| Birmingham       | 1997        | 0.98<br>(0.91–1.05) |
| Birmingham       | 1998        | 0.96<br>(0.89–1.03) |
| Birmingham       | 1999        | 1.0<br>(0.93–1.08)  |
| Birmingham       | 2000        | 1.0<br>(0.92–1.1)   |
| Birmingham       | 2001        | 0.99<br>(0.93–1.06) |
| Birmingham       | 2002        | 1.0<br>(0.94–1.08)  |

**Table 15 Ratio of adjusted to unadjusted 5q0 values for scaled locations by year**

| <b>Geography</b> | <b>Year</b> | <b>Ratio</b>        |
|------------------|-------------|---------------------|
| Birmingham       | 2003        | 1.08<br>(0.99–1.17) |
| Birmingham       | 2004        | 1.04<br>(0.96–1.13) |
| Birmingham       | 2005        | 1.03<br>(0.95–1.12) |
| Birmingham       | 2006        | 1.04<br>(0.96–1.13) |
| Birmingham       | 2007        | 1.04<br>(0.96–1.12) |
| Birmingham       | 2008        | 1.05<br>(0.97–1.12) |
| Birmingham       | 2009        | 1.01<br>(0.93–1.08) |
| Birmingham       | 2010        | 0.97<br>(0.9–1.04)  |
| Birmingham       | 2011        | 0.98<br>(0.91–1.06) |
| Birmingham       | 2012        | 0.97<br>(0.9–1.05)  |
| Birmingham       | 2013        | 0.96<br>(0.91–1.02) |
| Birmingham       | 2014        | 0.99<br>(0.91–1.08) |
| Birmingham       | 2015        | 1.05<br>(0.95–1.15) |
| Birmingham       | 2016        | 1.09<br>(0.98–1.2)  |
| Birmingham       | 2017        | 1.09<br>(0.93–1.26) |
| Coventry         | 1950        | 0.55<br>(0.46–0.66) |
| Coventry         | 1951        | 0.65<br>(0.53–0.77) |
| Coventry         | 1952        | 0.61<br>(0.5–0.72)  |
| Coventry         | 1953        | 0.61<br>(0.51–0.73) |
| Coventry         | 1954        | 0.58<br>(0.48–0.69) |
| Coventry         | 1955        | 0.58<br>(0.49–0.69) |
| Coventry         | 1956        | 0.58<br>(0.48–0.69) |
| Coventry         | 1957        | 0.59<br>(0.5–0.7)   |
| Coventry         | 1958        | 0.59<br>(0.49–0.69) |
| Coventry         | 1959        | 0.59<br>(0.5–0.7)   |
| Coventry         | 1960        | 0.61<br>(0.51–0.72) |
| Coventry         | 1961        | 0.62<br>(0.52–0.74) |
| Coventry         | 1962        | 0.65<br>(0.54–0.78) |
| Coventry         | 1963        | 0.66<br>(0.55–0.79) |
| Coventry         | 1964        | 0.65<br>(0.54–0.78) |
| Coventry         | 1965        | 0.64<br>(0.52–0.77) |

**Table 15 Ratio of adjusted to unadjusted 5q0 values for scaled locations by year**

| <b>Geography</b> | <b>Year</b> | <b>Ratio</b>        |
|------------------|-------------|---------------------|
| Coventry         | 1966        | 0.67<br>(0.55–0.79) |
| Coventry         | 1967        | 0.66<br>(0.54–0.79) |
| Coventry         | 1968        | 0.7<br>(0.57–0.83)  |
| Coventry         | 1969        | 0.72<br>(0.59–0.86) |
| Coventry         | 1970        | 0.75<br>(0.63–0.89) |
| Coventry         | 1971        | 0.79<br>(0.66–0.93) |
| Coventry         | 1972        | 0.8<br>(0.68–0.93)  |
| Coventry         | 1973        | 0.81<br>(0.7–0.93)  |
| Coventry         | 1974        | 0.83<br>(0.72–0.95) |
| Coventry         | 1975        | 0.84<br>(0.73–0.95) |
| Coventry         | 1976        | 0.82<br>(0.72–0.93) |
| Coventry         | 1977        | 0.85<br>(0.76–0.95) |
| Coventry         | 1978        | 0.91<br>(0.82–1.0)  |
| Coventry         | 1979        | 0.94<br>(0.86–1.02) |
| Coventry         | 1980        | 0.93<br>(0.86–0.99) |
| Coventry         | 1981        | 0.89<br>(0.83–0.94) |
| Coventry         | 1982        | 0.95<br>(0.9–1.01)  |
| Coventry         | 1983        | 0.97<br>(0.92–1.03) |
| Coventry         | 1984        | 0.96<br>(0.91–1.02) |
| Coventry         | 1985        | 0.96<br>(0.91–1.02) |
| Coventry         | 1986        | 0.98<br>(0.92–1.04) |
| Coventry         | 1987        | 0.99<br>(0.94–1.05) |
| Coventry         | 1988        | 1.05<br>(1.0–1.11)  |
| Coventry         | 1989        | 1.05<br>(0.99–1.1)  |
| Coventry         | 1990        | 1.07<br>(1.02–1.13) |
| Coventry         | 1991        | 1.02<br>(0.95–1.1)  |
| Coventry         | 1992        | 0.95<br>(0.89–1.01) |
| Coventry         | 1993        | 0.93<br>(0.86–1.0)  |
| Coventry         | 1994        | 0.94<br>(0.87–1.01) |
| Coventry         | 1995        | 0.95<br>(0.87–1.02) |
| Coventry         | 1996        | 0.98<br>(0.9–1.05)  |

**Table 15 Ratio of adjusted to unadjusted 5q0 values for scaled locations by year**

| <b>Geography</b> | <b>Year</b> | <b>Ratio</b>        |
|------------------|-------------|---------------------|
| Coventry         | 1997        | 0.98<br>(0.91–1.05) |
| Coventry         | 1998        | 0.96<br>(0.89–1.03) |
| Coventry         | 1999        | 1.0<br>(0.93–1.08)  |
| Coventry         | 2000        | 1.0<br>(0.92–1.1)   |
| Coventry         | 2001        | 0.99<br>(0.93–1.06) |
| Coventry         | 2002        | 1.0<br>(0.94–1.08)  |
| Coventry         | 2003        | 1.08<br>(0.99–1.17) |
| Coventry         | 2004        | 1.04<br>(0.96–1.13) |
| Coventry         | 2005        | 1.03<br>(0.95–1.12) |
| Coventry         | 2006        | 1.04<br>(0.96–1.13) |
| Coventry         | 2007        | 1.04<br>(0.96–1.12) |
| Coventry         | 2008        | 1.05<br>(0.97–1.12) |
| Coventry         | 2009        | 1.01<br>(0.93–1.08) |
| Coventry         | 2010        | 0.97<br>(0.9–1.04)  |
| Coventry         | 2011        | 0.98<br>(0.91–1.06) |
| Coventry         | 2012        | 0.97<br>(0.9–1.05)  |
| Coventry         | 2013        | 0.96<br>(0.91–1.02) |
| Coventry         | 2014        | 0.99<br>(0.91–1.08) |
| Coventry         | 2015        | 1.05<br>(0.95–1.15) |
| Coventry         | 2016        | 1.09<br>(0.98–1.2)  |
| Coventry         | 2017        | 1.09<br>(0.93–1.26) |
| Dudley           | 1950        | 0.55<br>(0.46–0.66) |
| Dudley           | 1951        | 0.64<br>(0.53–0.77) |
| Dudley           | 1952        | 0.6<br>(0.5–0.72)   |
| Dudley           | 1953        | 0.61<br>(0.5–0.73)  |
| Dudley           | 1954        | 0.58<br>(0.48–0.69) |
| Dudley           | 1955        | 0.58<br>(0.49–0.69) |
| Dudley           | 1956        | 0.58<br>(0.48–0.68) |
| Dudley           | 1957        | 0.59<br>(0.5–0.7)   |
| Dudley           | 1958        | 0.58<br>(0.49–0.69) |
| Dudley           | 1959        | 0.59<br>(0.5–0.7)   |



**Table 15 Ratio of adjusted to unadjusted 5q0 values for scaled locations by year**

| <b>Geography</b> | <b>Year</b> | <b>Ratio</b>        |
|------------------|-------------|---------------------|
| Dudley           | 1960        | 0.61<br>(0.51–0.72) |
| Dudley           | 1961        | 0.62<br>(0.52–0.74) |
| Dudley           | 1962        | 0.65<br>(0.53–0.78) |
| Dudley           | 1963        | 0.66<br>(0.55–0.79) |
| Dudley           | 1964        | 0.65<br>(0.53–0.78) |
| Dudley           | 1965        | 0.64<br>(0.52–0.77) |
| Dudley           | 1966        | 0.67<br>(0.54–0.79) |
| Dudley           | 1967        | 0.66<br>(0.54–0.79) |
| Dudley           | 1968        | 0.7<br>(0.57–0.83)  |
| Dudley           | 1969        | 0.72<br>(0.59–0.86) |
| Dudley           | 1970        | 0.75<br>(0.62–0.89) |
| Dudley           | 1971        | 0.79<br>(0.65–0.93) |
| Dudley           | 1972        | 0.8<br>(0.68–0.93)  |
| Dudley           | 1973        | 0.81<br>(0.7–0.93)  |
| Dudley           | 1974        | 0.83<br>(0.72–0.95) |
| Dudley           | 1975        | 0.84<br>(0.73–0.95) |
| Dudley           | 1976        | 0.82<br>(0.71–0.93) |
| Dudley           | 1977        | 0.85<br>(0.76–0.95) |
| Dudley           | 1978        | 0.91<br>(0.82–1.0)  |
| Dudley           | 1979        | 0.94<br>(0.86–1.02) |
| Dudley           | 1980        | 0.93<br>(0.86–0.99) |
| Dudley           | 1981        | 0.89<br>(0.83–0.94) |
| Dudley           | 1982        | 0.95<br>(0.9–1.01)  |
| Dudley           | 1983        | 0.97<br>(0.92–1.03) |
| Dudley           | 1984        | 0.96<br>(0.91–1.02) |
| Dudley           | 1985        | 0.96<br>(0.91–1.02) |
| Dudley           | 1986        | 0.98<br>(0.92–1.04) |
| Dudley           | 1987        | 0.99<br>(0.94–1.05) |
| Dudley           | 1988        | 1.05<br>(1.0–1.11)  |
| Dudley           | 1989        | 1.05<br>(0.99–1.1)  |
| Dudley           | 1990        | 1.07<br>(1.02–1.13) |

**Table 15 Ratio of adjusted to unadjusted 5q0 values for scaled locations by year**

| <b>Geography</b>         | <b>Year</b> | <b>Ratio</b>        |
|--------------------------|-------------|---------------------|
| Dudley                   | 1991        | 1.02<br>(0.95–1.1)  |
| Dudley                   | 1992        | 0.95<br>(0.89–1.01) |
| Dudley                   | 1993        | 0.93<br>(0.86–1.0)  |
| Dudley                   | 1994        | 0.94<br>(0.87–1.01) |
| Dudley                   | 1995        | 0.95<br>(0.87–1.02) |
| Dudley                   | 1996        | 0.98<br>(0.9–1.05)  |
| Dudley                   | 1997        | 0.98<br>(0.91–1.05) |
| Dudley                   | 1998        | 0.96<br>(0.89–1.03) |
| Dudley                   | 1999        | 1.0<br>(0.93–1.08)  |
| Dudley                   | 2000        | 1.0<br>(0.92–1.1)   |
| Dudley                   | 2001        | 0.99<br>(0.93–1.06) |
| Dudley                   | 2002        | 1.0<br>(0.94–1.08)  |
| Dudley                   | 2003        | 1.08<br>(0.99–1.17) |
| Dudley                   | 2004        | 1.04<br>(0.96–1.13) |
| Dudley                   | 2005        | 1.03<br>(0.95–1.12) |
| Dudley                   | 2006        | 1.04<br>(0.96–1.13) |
| Dudley                   | 2007        | 1.04<br>(0.96–1.12) |
| Dudley                   | 2008        | 1.05<br>(0.97–1.12) |
| Dudley                   | 2009        | 1.01<br>(0.93–1.08) |
| Dudley                   | 2010        | 0.97<br>(0.9–1.04)  |
| Dudley                   | 2011        | 0.98<br>(0.91–1.06) |
| Dudley                   | 2012        | 0.97<br>(0.9–1.05)  |
| Dudley                   | 2013        | 0.96<br>(0.91–1.02) |
| Dudley                   | 2014        | 0.99<br>(0.91–1.08) |
| Dudley                   | 2015        | 1.05<br>(0.95–1.15) |
| Dudley                   | 2016        | 1.09<br>(0.98–1.2)  |
| Dudley                   | 2017        | 1.09<br>(0.93–1.26) |
| Herefordshire, County of | 1950        | 0.55<br>(0.46–0.66) |
| Herefordshire, County of | 1951        | 0.64<br>(0.53–0.77) |
| Herefordshire, County of | 1952        | 0.61<br>(0.5–0.72)  |
| Herefordshire, County of | 1953        | 0.61<br>(0.51–0.73) |

**Table 15 Ratio of adjusted to unadjusted 5q0 values for scaled locations by year**

| <b>Geography</b>         | <b>Year</b> | <b>Ratio</b>        |
|--------------------------|-------------|---------------------|
| Herefordshire, County of | 1954        | 0.58<br>(0.48–0.69) |
| Herefordshire, County of | 1955        | 0.58<br>(0.49–0.69) |
| Herefordshire, County of | 1956        | 0.58<br>(0.48–0.69) |
| Herefordshire, County of | 1957        | 0.59<br>(0.5–0.7)   |
| Herefordshire, County of | 1958        | 0.59<br>(0.49–0.69) |
| Herefordshire, County of | 1959        | 0.59<br>(0.5–0.7)   |
| Herefordshire, County of | 1960        | 0.61<br>(0.51–0.72) |
| Herefordshire, County of | 1961        | 0.62<br>(0.52–0.74) |
| Herefordshire, County of | 1962        | 0.65<br>(0.54–0.78) |
| Herefordshire, County of | 1963        | 0.66<br>(0.55–0.79) |
| Herefordshire, County of | 1964        | 0.65<br>(0.53–0.78) |
| Herefordshire, County of | 1965        | 0.64<br>(0.52–0.77) |
| Herefordshire, County of | 1966        | 0.67<br>(0.55–0.79) |
| Herefordshire, County of | 1967        | 0.66<br>(0.54–0.79) |
| Herefordshire, County of | 1968        | 0.7<br>(0.57–0.83)  |
| Herefordshire, County of | 1969        | 0.72<br>(0.59–0.86) |
| Herefordshire, County of | 1970        | 0.75<br>(0.62–0.89) |
| Herefordshire, County of | 1971        | 0.79<br>(0.66–0.93) |
| Herefordshire, County of | 1972        | 0.8<br>(0.68–0.93)  |
| Herefordshire, County of | 1973        | 0.81<br>(0.7–0.93)  |
| Herefordshire, County of | 1974        | 0.83<br>(0.72–0.95) |
| Herefordshire, County of | 1975        | 0.84<br>(0.73–0.95) |
| Herefordshire, County of | 1976        | 0.82<br>(0.72–0.93) |
| Herefordshire, County of | 1977        | 0.85<br>(0.76–0.95) |
| Herefordshire, County of | 1978        | 0.91<br>(0.82–1.0)  |
| Herefordshire, County of | 1979        | 0.94<br>(0.86–1.02) |
| Herefordshire, County of | 1980        | 0.93<br>(0.86–0.99) |
| Herefordshire, County of | 1981        | 0.89<br>(0.83–0.94) |
| Herefordshire, County of | 1982        | 0.95<br>(0.9–1.01)  |
| Herefordshire, County of | 1983        | 0.97<br>(0.92–1.03) |
| Herefordshire, County of | 1984        | 0.96<br>(0.91–1.02) |

**Table 15 Ratio of adjusted to unadjusted 5q0 values for scaled locations by year**

| <b>Geography</b>         | <b>Year</b> | <b>Ratio</b>        |
|--------------------------|-------------|---------------------|
| Herefordshire, County of | 1985        | 0.96<br>(0.91–1.02) |
| Herefordshire, County of | 1986        | 0.98<br>(0.92–1.04) |
| Herefordshire, County of | 1987        | 0.99<br>(0.94–1.05) |
| Herefordshire, County of | 1988        | 1.05<br>(1.0–1.11)  |
| Herefordshire, County of | 1989        | 1.05<br>(0.99–1.1)  |
| Herefordshire, County of | 1990        | 1.07<br>(1.02–1.13) |
| Herefordshire, County of | 1991        | 1.02<br>(0.95–1.1)  |
| Herefordshire, County of | 1992        | 0.95<br>(0.89–1.01) |
| Herefordshire, County of | 1993        | 0.93<br>(0.86–1.0)  |
| Herefordshire, County of | 1994        | 0.94<br>(0.87–1.01) |
| Herefordshire, County of | 1995        | 0.95<br>(0.87–1.02) |
| Herefordshire, County of | 1996        | 0.98<br>(0.9–1.05)  |
| Herefordshire, County of | 1997        | 0.98<br>(0.91–1.05) |
| Herefordshire, County of | 1998        | 0.96<br>(0.89–1.03) |
| Herefordshire, County of | 1999        | 1.0<br>(0.93–1.08)  |
| Herefordshire, County of | 2000        | 1.0<br>(0.92–1.1)   |
| Herefordshire, County of | 2001        | 0.99<br>(0.93–1.06) |
| Herefordshire, County of | 2002        | 1.0<br>(0.94–1.08)  |
| Herefordshire, County of | 2003        | 1.08<br>(0.99–1.17) |
| Herefordshire, County of | 2004        | 1.04<br>(0.96–1.13) |
| Herefordshire, County of | 2005        | 1.03<br>(0.95–1.12) |
| Herefordshire, County of | 2006        | 1.04<br>(0.96–1.13) |
| Herefordshire, County of | 2007        | 1.04<br>(0.96–1.12) |
| Herefordshire, County of | 2008        | 1.05<br>(0.97–1.12) |
| Herefordshire, County of | 2009        | 1.01<br>(0.93–1.08) |
| Herefordshire, County of | 2010        | 0.97<br>(0.9–1.04)  |
| Herefordshire, County of | 2011        | 0.98<br>(0.91–1.06) |
| Herefordshire, County of | 2012        | 0.97<br>(0.9–1.05)  |
| Herefordshire, County of | 2013        | 0.96<br>(0.91–1.02) |
| Herefordshire, County of | 2014        | 0.99<br>(0.91–1.08) |
| Herefordshire, County of | 2015        | 1.05<br>(0.95–1.15) |

**Table 15 Ratio of adjusted to unadjusted 5q0 values for scaled locations by year**

| <b>Geography</b>         | <b>Year</b> | <b>Ratio</b>        |
|--------------------------|-------------|---------------------|
| Herefordshire, County of | 2016        | 1.09<br>(0.98–1.2)  |
| Herefordshire, County of | 2017        | 1.09<br>(0.93–1.26) |
| Sandwell                 | 1950        | 0.55<br>(0.46–0.66) |
| Sandwell                 | 1951        | 0.65<br>(0.53–0.77) |
| Sandwell                 | 1952        | 0.61<br>(0.5–0.72)  |
| Sandwell                 | 1953        | 0.61<br>(0.51–0.73) |
| Sandwell                 | 1954        | 0.58<br>(0.48–0.69) |
| Sandwell                 | 1955        | 0.58<br>(0.49–0.69) |
| Sandwell                 | 1956        | 0.58<br>(0.48–0.69) |
| Sandwell                 | 1957        | 0.59<br>(0.5–0.7)   |
| Sandwell                 | 1958        | 0.59<br>(0.49–0.69) |
| Sandwell                 | 1959        | 0.59<br>(0.5–0.7)   |
| Sandwell                 | 1960        | 0.61<br>(0.51–0.72) |
| Sandwell                 | 1961        | 0.63<br>(0.52–0.74) |
| Sandwell                 | 1962        | 0.65<br>(0.54–0.78) |
| Sandwell                 | 1963        | 0.66<br>(0.55–0.79) |
| Sandwell                 | 1964        | 0.65<br>(0.54–0.78) |
| Sandwell                 | 1965        | 0.64<br>(0.52–0.77) |
| Sandwell                 | 1966        | 0.67<br>(0.55–0.79) |
| Sandwell                 | 1967        | 0.66<br>(0.54–0.79) |
| Sandwell                 | 1968        | 0.7<br>(0.57–0.83)  |
| Sandwell                 | 1969        | 0.72<br>(0.59–0.86) |
| Sandwell                 | 1970        | 0.75<br>(0.62–0.89) |
| Sandwell                 | 1971        | 0.79<br>(0.66–0.93) |
| Sandwell                 | 1972        | 0.8<br>(0.68–0.93)  |
| Sandwell                 | 1973        | 0.81<br>(0.7–0.93)  |
| Sandwell                 | 1974        | 0.83<br>(0.72–0.95) |
| Sandwell                 | 1975        | 0.84<br>(0.73–0.95) |
| Sandwell                 | 1976        | 0.82<br>(0.72–0.93) |
| Sandwell                 | 1977        | 0.85<br>(0.76–0.95) |
| Sandwell                 | 1978        | 0.91<br>(0.82–1.0)  |

**Table 15 Ratio of adjusted to unadjusted 5q0 values for scaled locations by year**

| <b>Geography</b> | <b>Year</b> | <b>Ratio</b>        |
|------------------|-------------|---------------------|
| Sandwell         | 1979        | 0.94<br>(0.86–1.02) |
| Sandwell         | 1980        | 0.93<br>(0.86–0.99) |
| Sandwell         | 1981        | 0.89<br>(0.83–0.94) |
| Sandwell         | 1982        | 0.95<br>(0.9–1.01)  |
| Sandwell         | 1983        | 0.97<br>(0.92–1.03) |
| Sandwell         | 1984        | 0.96<br>(0.91–1.02) |
| Sandwell         | 1985        | 0.96<br>(0.91–1.02) |
| Sandwell         | 1986        | 0.98<br>(0.92–1.04) |
| Sandwell         | 1987        | 0.99<br>(0.94–1.05) |
| Sandwell         | 1988        | 1.05<br>(1.0–1.11)  |
| Sandwell         | 1989        | 1.05<br>(0.99–1.1)  |
| Sandwell         | 1990        | 1.07<br>(1.02–1.13) |
| Sandwell         | 1991        | 1.02<br>(0.95–1.1)  |
| Sandwell         | 1992        | 0.95<br>(0.89–1.01) |
| Sandwell         | 1993        | 0.93<br>(0.86–1.0)  |
| Sandwell         | 1994        | 0.94<br>(0.87–1.01) |
| Sandwell         | 1995        | 0.95<br>(0.87–1.02) |
| Sandwell         | 1996        | 0.98<br>(0.9–1.05)  |
| Sandwell         | 1997        | 0.98<br>(0.91–1.05) |
| Sandwell         | 1998        | 0.96<br>(0.89–1.03) |
| Sandwell         | 1999        | 1.0<br>(0.93–1.08)  |
| Sandwell         | 2000        | 1.0<br>(0.92–1.1)   |
| Sandwell         | 2001        | 0.99<br>(0.93–1.06) |
| Sandwell         | 2002        | 1.0<br>(0.94–1.08)  |
| Sandwell         | 2003        | 1.08<br>(0.99–1.17) |
| Sandwell         | 2004        | 1.04<br>(0.96–1.13) |
| Sandwell         | 2005        | 1.03<br>(0.95–1.12) |
| Sandwell         | 2006        | 1.04<br>(0.96–1.13) |
| Sandwell         | 2007        | 1.04<br>(0.96–1.12) |
| Sandwell         | 2008        | 1.05<br>(0.97–1.12) |
| Sandwell         | 2009        | 1.01<br>(0.93–1.08) |

**Table 15 Ratio of adjusted to unadjusted 5q0 values for scaled locations by year**

| <b>Geography</b> | <b>Year</b> | <b>Ratio</b>        |
|------------------|-------------|---------------------|
| Sandwell         | 2010        | 0.97<br>(0.9–1.04)  |
| Sandwell         | 2011        | 0.98<br>(0.91–1.06) |
| Sandwell         | 2012        | 0.97<br>(0.9–1.05)  |
| Sandwell         | 2013        | 0.96<br>(0.91–1.02) |
| Sandwell         | 2014        | 0.99<br>(0.91–1.08) |
| Sandwell         | 2015        | 1.05<br>(0.95–1.15) |
| Sandwell         | 2016        | 1.09<br>(0.98–1.2)  |
| Sandwell         | 2017        | 1.09<br>(0.93–1.26) |
| Shropshire       | 1950        | 0.55<br>(0.46–0.66) |
| Shropshire       | 1951        | 0.64<br>(0.53–0.77) |
| Shropshire       | 1952        | 0.6<br>(0.5–0.72)   |
| Shropshire       | 1953        | 0.61<br>(0.5–0.73)  |
| Shropshire       | 1954        | 0.58<br>(0.48–0.69) |
| Shropshire       | 1955        | 0.58<br>(0.49–0.69) |
| Shropshire       | 1956        | 0.58<br>(0.48–0.68) |
| Shropshire       | 1957        | 0.59<br>(0.5–0.7)   |
| Shropshire       | 1958        | 0.58<br>(0.49–0.69) |
| Shropshire       | 1959        | 0.59<br>(0.5–0.7)   |
| Shropshire       | 1960        | 0.61<br>(0.51–0.72) |
| Shropshire       | 1961        | 0.62<br>(0.52–0.74) |
| Shropshire       | 1962        | 0.65<br>(0.53–0.78) |
| Shropshire       | 1963        | 0.66<br>(0.55–0.79) |
| Shropshire       | 1964        | 0.65<br>(0.53–0.78) |
| Shropshire       | 1965        | 0.64<br>(0.52–0.77) |
| Shropshire       | 1966        | 0.67<br>(0.55–0.79) |
| Shropshire       | 1967        | 0.66<br>(0.54–0.79) |
| Shropshire       | 1968        | 0.7<br>(0.57–0.83)  |
| Shropshire       | 1969        | 0.72<br>(0.59–0.86) |
| Shropshire       | 1970        | 0.75<br>(0.62–0.89) |
| Shropshire       | 1971        | 0.79<br>(0.65–0.93) |
| Shropshire       | 1972        | 0.8<br>(0.68–0.93)  |

**Table 15 Ratio of adjusted to unadjusted 5q0 values for scaled locations by year**

| <b>Geography</b> | <b>Year</b> | <b>Ratio</b>        |
|------------------|-------------|---------------------|
| Shropshire       | 1973        | 0.81<br>(0.7–0.93)  |
| Shropshire       | 1974        | 0.83<br>(0.72–0.95) |
| Shropshire       | 1975        | 0.84<br>(0.73–0.95) |
| Shropshire       | 1976        | 0.82<br>(0.71–0.93) |
| Shropshire       | 1977        | 0.85<br>(0.76–0.95) |
| Shropshire       | 1978        | 0.91<br>(0.82–1.0)  |
| Shropshire       | 1979        | 0.94<br>(0.86–1.02) |
| Shropshire       | 1980        | 0.93<br>(0.86–0.99) |
| Shropshire       | 1981        | 0.89<br>(0.83–0.94) |
| Shropshire       | 1982        | 0.95<br>(0.9–1.01)  |
| Shropshire       | 1983        | 0.97<br>(0.92–1.03) |
| Shropshire       | 1984        | 0.96<br>(0.91–1.02) |
| Shropshire       | 1985        | 0.96<br>(0.91–1.02) |
| Shropshire       | 1986        | 0.98<br>(0.92–1.04) |
| Shropshire       | 1987        | 0.99<br>(0.94–1.05) |
| Shropshire       | 1988        | 1.05<br>(1.0–1.11)  |
| Shropshire       | 1989        | 1.05<br>(0.99–1.1)  |
| Shropshire       | 1990        | 1.07<br>(1.02–1.13) |
| Shropshire       | 1991        | 1.02<br>(0.95–1.1)  |
| Shropshire       | 1992        | 0.95<br>(0.89–1.01) |
| Shropshire       | 1993        | 0.93<br>(0.86–1.0)  |
| Shropshire       | 1994        | 0.94<br>(0.87–1.01) |
| Shropshire       | 1995        | 0.95<br>(0.87–1.02) |
| Shropshire       | 1996        | 0.98<br>(0.9–1.05)  |
| Shropshire       | 1997        | 0.98<br>(0.91–1.05) |
| Shropshire       | 1998        | 0.96<br>(0.89–1.03) |
| Shropshire       | 1999        | 1.0<br>(0.93–1.08)  |
| Shropshire       | 2000        | 1.0<br>(0.92–1.1)   |
| Shropshire       | 2001        | 0.99<br>(0.93–1.06) |
| Shropshire       | 2002        | 1.0<br>(0.94–1.08)  |
| Shropshire       | 2003        | 1.08<br>(0.99–1.17) |



**Table 15 Ratio of adjusted to unadjusted 5q0 values for scaled locations by year**

| <b>Geography</b> | <b>Year</b> | <b>Ratio</b>        |
|------------------|-------------|---------------------|
| Shropshire       | 2004        | 1.04<br>(0.96–1.13) |
| Shropshire       | 2005        | 1.03<br>(0.95–1.12) |
| Shropshire       | 2006        | 1.04<br>(0.96–1.13) |
| Shropshire       | 2007        | 1.04<br>(0.96–1.12) |
| Shropshire       | 2008        | 1.05<br>(0.97–1.12) |
| Shropshire       | 2009        | 1.01<br>(0.93–1.08) |
| Shropshire       | 2010        | 0.97<br>(0.9–1.04)  |
| Shropshire       | 2011        | 0.98<br>(0.91–1.06) |
| Shropshire       | 2012        | 0.97<br>(0.9–1.05)  |
| Shropshire       | 2013        | 0.96<br>(0.91–1.02) |
| Shropshire       | 2014        | 0.99<br>(0.91–1.08) |
| Shropshire       | 2015        | 1.05<br>(0.95–1.15) |
| Shropshire       | 2016        | 1.09<br>(0.98–1.2)  |
| Shropshire       | 2017        | 1.09<br>(0.93–1.26) |
| Solihull         | 1950        | 0.55<br>(0.46–0.66) |
| Solihull         | 1951        | 0.64<br>(0.53–0.77) |
| Solihull         | 1952        | 0.61<br>(0.5–0.72)  |
| Solihull         | 1953        | 0.61<br>(0.5–0.73)  |
| Solihull         | 1954        | 0.58<br>(0.48–0.69) |
| Solihull         | 1955        | 0.58<br>(0.49–0.69) |
| Solihull         | 1956        | 0.58<br>(0.48–0.68) |
| Solihull         | 1957        | 0.59<br>(0.5–0.7)   |
| Solihull         | 1958        | 0.58<br>(0.49–0.69) |
| Solihull         | 1959        | 0.59<br>(0.5–0.7)   |
| Solihull         | 1960        | 0.61<br>(0.51–0.72) |
| Solihull         | 1961        | 0.62<br>(0.52–0.74) |
| Solihull         | 1962        | 0.65<br>(0.54–0.78) |
| Solihull         | 1963        | 0.66<br>(0.55–0.79) |
| Solihull         | 1964        | 0.65<br>(0.53–0.78) |
| Solihull         | 1965        | 0.64<br>(0.52–0.77) |
| Solihull         | 1966        | 0.67<br>(0.55–0.79) |

**Table 15 Ratio of adjusted to unadjusted 5q0 values for scaled locations by year**

| <b>Geography</b> | <b>Year</b> | <b>Ratio</b>        |
|------------------|-------------|---------------------|
| Solihull         | 1967        | 0.66<br>(0.54–0.79) |
| Solihull         | 1968        | 0.7<br>(0.57–0.83)  |
| Solihull         | 1969        | 0.72<br>(0.59–0.86) |
| Solihull         | 1970        | 0.75<br>(0.62–0.89) |
| Solihull         | 1971        | 0.79<br>(0.65–0.93) |
| Solihull         | 1972        | 0.8<br>(0.68–0.93)  |
| Solihull         | 1973        | 0.81<br>(0.7–0.93)  |
| Solihull         | 1974        | 0.83<br>(0.72–0.95) |
| Solihull         | 1975        | 0.84<br>(0.73–0.95) |
| Solihull         | 1976        | 0.82<br>(0.72–0.93) |
| Solihull         | 1977        | 0.85<br>(0.76–0.95) |
| Solihull         | 1978        | 0.91<br>(0.82–1.0)  |
| Solihull         | 1979        | 0.94<br>(0.86–1.02) |
| Solihull         | 1980        | 0.93<br>(0.86–0.99) |
| Solihull         | 1981        | 0.89<br>(0.83–0.94) |
| Solihull         | 1982        | 0.95<br>(0.9–1.01)  |
| Solihull         | 1983        | 0.97<br>(0.92–1.03) |
| Solihull         | 1984        | 0.96<br>(0.91–1.02) |
| Solihull         | 1985        | 0.96<br>(0.91–1.02) |
| Solihull         | 1986        | 0.98<br>(0.92–1.04) |
| Solihull         | 1987        | 0.99<br>(0.94–1.05) |
| Solihull         | 1988        | 1.05<br>(1.0–1.11)  |
| Solihull         | 1989        | 1.05<br>(0.99–1.1)  |
| Solihull         | 1990        | 1.07<br>(1.02–1.13) |
| Solihull         | 1991        | 1.02<br>(0.95–1.1)  |
| Solihull         | 1992        | 0.95<br>(0.89–1.01) |
| Solihull         | 1993        | 0.93<br>(0.86–1.0)  |
| Solihull         | 1994        | 0.94<br>(0.87–1.01) |
| Solihull         | 1995        | 0.95<br>(0.87–1.02) |
| Solihull         | 1996        | 0.98<br>(0.9–1.05)  |
| Solihull         | 1997        | 0.98<br>(0.91–1.05) |

**Table 15 Ratio of adjusted to unadjusted 5q0 values for scaled locations by year**

| <b>Geography</b> | <b>Year</b> | <b>Ratio</b>        |
|------------------|-------------|---------------------|
| Solihull         | 1998        | 0.96<br>(0.89–1.03) |
| Solihull         | 1999        | 1.0<br>(0.93–1.08)  |
| Solihull         | 2000        | 1.0<br>(0.92–1.1)   |
| Solihull         | 2001        | 0.99<br>(0.93–1.06) |
| Solihull         | 2002        | 1.0<br>(0.94–1.08)  |
| Solihull         | 2003        | 1.08<br>(0.99–1.17) |
| Solihull         | 2004        | 1.04<br>(0.96–1.13) |
| Solihull         | 2005        | 1.03<br>(0.95–1.12) |
| Solihull         | 2006        | 1.04<br>(0.96–1.13) |
| Solihull         | 2007        | 1.04<br>(0.96–1.12) |
| Solihull         | 2008        | 1.05<br>(0.97–1.12) |
| Solihull         | 2009        | 1.01<br>(0.93–1.08) |
| Solihull         | 2010        | 0.97<br>(0.9–1.04)  |
| Solihull         | 2011        | 0.98<br>(0.91–1.06) |
| Solihull         | 2012        | 0.97<br>(0.9–1.05)  |
| Solihull         | 2013        | 0.96<br>(0.91–1.02) |
| Solihull         | 2014        | 0.99<br>(0.91–1.08) |
| Solihull         | 2015        | 1.05<br>(0.95–1.15) |
| Solihull         | 2016        | 1.09<br>(0.98–1.2)  |
| Solihull         | 2017        | 1.09<br>(0.93–1.26) |
| Staffordshire    | 1950        | 0.55<br>(0.46–0.66) |
| Staffordshire    | 1951        | 0.64<br>(0.53–0.77) |
| Staffordshire    | 1952        | 0.61<br>(0.5–0.72)  |
| Staffordshire    | 1953        | 0.61<br>(0.5–0.73)  |
| Staffordshire    | 1954        | 0.58<br>(0.48–0.69) |
| Staffordshire    | 1955        | 0.58<br>(0.49–0.69) |
| Staffordshire    | 1956        | 0.58<br>(0.48–0.68) |
| Staffordshire    | 1957        | 0.59<br>(0.5–0.7)   |
| Staffordshire    | 1958        | 0.58<br>(0.49–0.69) |
| Staffordshire    | 1959        | 0.59<br>(0.5–0.7)   |
| Staffordshire    | 1960        | 0.61<br>(0.51–0.72) |

**Table 15 Ratio of adjusted to unadjusted 5q0 values for scaled locations by year**

| <b>Geography</b> | <b>Year</b> | <b>Ratio</b>        |
|------------------|-------------|---------------------|
| Staffordshire    | 1961        | 0.62<br>(0.52–0.74) |
| Staffordshire    | 1962        | 0.65<br>(0.54–0.78) |
| Staffordshire    | 1963        | 0.66<br>(0.55–0.79) |
| Staffordshire    | 1964        | 0.65<br>(0.53–0.78) |
| Staffordshire    | 1965        | 0.64<br>(0.52–0.77) |
| Staffordshire    | 1966        | 0.67<br>(0.55–0.79) |
| Staffordshire    | 1967        | 0.66<br>(0.54–0.79) |
| Staffordshire    | 1968        | 0.7<br>(0.57–0.83)  |
| Staffordshire    | 1969        | 0.72<br>(0.59–0.86) |
| Staffordshire    | 1970        | 0.75<br>(0.62–0.89) |
| Staffordshire    | 1971        | 0.79<br>(0.66–0.93) |
| Staffordshire    | 1972        | 0.8<br>(0.68–0.93)  |
| Staffordshire    | 1973        | 0.81<br>(0.7–0.93)  |
| Staffordshire    | 1974        | 0.83<br>(0.72–0.95) |
| Staffordshire    | 1975        | 0.84<br>(0.73–0.95) |
| Staffordshire    | 1976        | 0.82<br>(0.72–0.93) |
| Staffordshire    | 1977        | 0.85<br>(0.76–0.95) |
| Staffordshire    | 1978        | 0.91<br>(0.82–1.0)  |
| Staffordshire    | 1979        | 0.94<br>(0.86–1.02) |
| Staffordshire    | 1980        | 0.93<br>(0.86–0.99) |
| Staffordshire    | 1981        | 0.89<br>(0.83–0.94) |
| Staffordshire    | 1982        | 0.95<br>(0.9–1.01)  |
| Staffordshire    | 1983        | 0.97<br>(0.92–1.03) |
| Staffordshire    | 1984        | 0.96<br>(0.91–1.02) |
| Staffordshire    | 1985        | 0.96<br>(0.91–1.02) |
| Staffordshire    | 1986        | 0.98<br>(0.92–1.04) |
| Staffordshire    | 1987        | 0.99<br>(0.94–1.05) |
| Staffordshire    | 1988        | 1.05<br>(1.0–1.11)  |
| Staffordshire    | 1989        | 1.05<br>(0.99–1.1)  |
| Staffordshire    | 1990        | 1.07<br>(1.02–1.13) |
| Staffordshire    | 1991        | 1.02<br>(0.95–1.1)  |

**Table 15 Ratio of adjusted to unadjusted 5q0 values for scaled locations by year**

| <b>Geography</b> | <b>Year</b> | <b>Ratio</b>        |
|------------------|-------------|---------------------|
| Staffordshire    | 1992        | 0.95<br>(0.89–1.01) |
| Staffordshire    | 1993        | 0.93<br>(0.86–1.0)  |
| Staffordshire    | 1994        | 0.94<br>(0.87–1.01) |
| Staffordshire    | 1995        | 0.95<br>(0.87–1.02) |
| Staffordshire    | 1996        | 0.98<br>(0.9–1.05)  |
| Staffordshire    | 1997        | 0.98<br>(0.91–1.05) |
| Staffordshire    | 1998        | 0.96<br>(0.89–1.03) |
| Staffordshire    | 1999        | 1.0<br>(0.93–1.08)  |
| Staffordshire    | 2000        | 1.0<br>(0.92–1.1)   |
| Staffordshire    | 2001        | 0.99<br>(0.93–1.06) |
| Staffordshire    | 2002        | 1.0<br>(0.94–1.08)  |
| Staffordshire    | 2003        | 1.08<br>(0.99–1.17) |
| Staffordshire    | 2004        | 1.04<br>(0.96–1.13) |
| Staffordshire    | 2005        | 1.03<br>(0.95–1.12) |
| Staffordshire    | 2006        | 1.04<br>(0.96–1.13) |
| Staffordshire    | 2007        | 1.04<br>(0.96–1.12) |
| Staffordshire    | 2008        | 1.05<br>(0.97–1.12) |
| Staffordshire    | 2009        | 1.01<br>(0.93–1.08) |
| Staffordshire    | 2010        | 0.97<br>(0.9–1.04)  |
| Staffordshire    | 2011        | 0.98<br>(0.91–1.06) |
| Staffordshire    | 2012        | 0.97<br>(0.9–1.05)  |
| Staffordshire    | 2013        | 0.96<br>(0.91–1.02) |
| Staffordshire    | 2014        | 0.99<br>(0.91–1.08) |
| Staffordshire    | 2015        | 1.05<br>(0.95–1.15) |
| Staffordshire    | 2016        | 1.09<br>(0.98–1.2)  |
| Staffordshire    | 2017        | 1.09<br>(0.93–1.26) |
| Stoke-on-Trent   | 1950        | 0.55<br>(0.46–0.66) |
| Stoke-on-Trent   | 1951        | 0.65<br>(0.53–0.77) |
| Stoke-on-Trent   | 1952        | 0.61<br>(0.5–0.72)  |
| Stoke-on-Trent   | 1953        | 0.61<br>(0.51–0.73) |
| Stoke-on-Trent   | 1954        | 0.58<br>(0.48–0.69) |

**Table 15 Ratio of adjusted to unadjusted 5q0 values for scaled locations by year**

| <b>Geography</b> | <b>Year</b> | <b>Ratio</b>        |
|------------------|-------------|---------------------|
| Stoke-on-Trent   | 1955        | 0.58<br>(0.49–0.69) |
| Stoke-on-Trent   | 1956        | 0.58<br>(0.48–0.69) |
| Stoke-on-Trent   | 1957        | 0.59<br>(0.5–0.7)   |
| Stoke-on-Trent   | 1958        | 0.59<br>(0.49–0.69) |
| Stoke-on-Trent   | 1959        | 0.59<br>(0.5–0.7)   |
| Stoke-on-Trent   | 1960        | 0.61<br>(0.51–0.72) |
| Stoke-on-Trent   | 1961        | 0.62<br>(0.52–0.74) |
| Stoke-on-Trent   | 1962        | 0.65<br>(0.54–0.78) |
| Stoke-on-Trent   | 1963        | 0.66<br>(0.55–0.79) |
| Stoke-on-Trent   | 1964        | 0.65<br>(0.53–0.78) |
| Stoke-on-Trent   | 1965        | 0.64<br>(0.52–0.77) |
| Stoke-on-Trent   | 1966        | 0.67<br>(0.55–0.79) |
| Stoke-on-Trent   | 1967        | 0.66<br>(0.54–0.79) |
| Stoke-on-Trent   | 1968        | 0.7<br>(0.57–0.83)  |
| Stoke-on-Trent   | 1969        | 0.72<br>(0.59–0.86) |
| Stoke-on-Trent   | 1970        | 0.75<br>(0.63–0.89) |
| Stoke-on-Trent   | 1971        | 0.79<br>(0.66–0.93) |
| Stoke-on-Trent   | 1972        | 0.8<br>(0.68–0.93)  |
| Stoke-on-Trent   | 1973        | 0.81<br>(0.7–0.93)  |
| Stoke-on-Trent   | 1974        | 0.83<br>(0.72–0.95) |
| Stoke-on-Trent   | 1975        | 0.84<br>(0.73–0.95) |
| Stoke-on-Trent   | 1976        | 0.82<br>(0.72–0.93) |
| Stoke-on-Trent   | 1977        | 0.85<br>(0.76–0.95) |
| Stoke-on-Trent   | 1978        | 0.91<br>(0.82–1.0)  |
| Stoke-on-Trent   | 1979        | 0.94<br>(0.86–1.02) |
| Stoke-on-Trent   | 1980        | 0.93<br>(0.86–0.99) |
| Stoke-on-Trent   | 1981        | 0.89<br>(0.83–0.94) |
| Stoke-on-Trent   | 1982        | 0.95<br>(0.9–1.01)  |
| Stoke-on-Trent   | 1983        | 0.97<br>(0.92–1.03) |
| Stoke-on-Trent   | 1984        | 0.96<br>(0.91–1.02) |
| Stoke-on-Trent   | 1985        | 0.96<br>(0.91–1.02) |

**Table 15 Ratio of adjusted to unadjusted 5q0 values for scaled locations by year**

| <b>Geography</b> | <b>Year</b> | <b>Ratio</b>        |
|------------------|-------------|---------------------|
| Stoke-on-Trent   | 1986        | 0.98<br>(0.92–1.04) |
| Stoke-on-Trent   | 1987        | 0.99<br>(0.94–1.05) |
| Stoke-on-Trent   | 1988        | 1.05<br>(1.0–1.11)  |
| Stoke-on-Trent   | 1989        | 1.05<br>(0.99–1.1)  |
| Stoke-on-Trent   | 1990        | 1.07<br>(1.02–1.13) |
| Stoke-on-Trent   | 1991        | 1.02<br>(0.95–1.1)  |
| Stoke-on-Trent   | 1992        | 0.95<br>(0.89–1.01) |
| Stoke-on-Trent   | 1993        | 0.93<br>(0.86–1.0)  |
| Stoke-on-Trent   | 1994        | 0.94<br>(0.87–1.01) |
| Stoke-on-Trent   | 1995        | 0.95<br>(0.87–1.02) |
| Stoke-on-Trent   | 1996        | 0.98<br>(0.9–1.05)  |
| Stoke-on-Trent   | 1997        | 0.98<br>(0.91–1.05) |
| Stoke-on-Trent   | 1998        | 0.96<br>(0.89–1.03) |
| Stoke-on-Trent   | 1999        | 1.0<br>(0.93–1.08)  |
| Stoke-on-Trent   | 2000        | 1.0<br>(0.92–1.1)   |
| Stoke-on-Trent   | 2001        | 0.99<br>(0.93–1.06) |
| Stoke-on-Trent   | 2002        | 1.0<br>(0.94–1.08)  |
| Stoke-on-Trent   | 2003        | 1.08<br>(0.99–1.17) |
| Stoke-on-Trent   | 2004        | 1.04<br>(0.96–1.13) |
| Stoke-on-Trent   | 2005        | 1.03<br>(0.95–1.12) |
| Stoke-on-Trent   | 2006        | 1.04<br>(0.96–1.13) |
| Stoke-on-Trent   | 2007        | 1.04<br>(0.96–1.12) |
| Stoke-on-Trent   | 2008        | 1.05<br>(0.97–1.12) |
| Stoke-on-Trent   | 2009        | 1.01<br>(0.93–1.08) |
| Stoke-on-Trent   | 2010        | 0.97<br>(0.9–1.04)  |
| Stoke-on-Trent   | 2011        | 0.98<br>(0.91–1.06) |
| Stoke-on-Trent   | 2012        | 0.97<br>(0.9–1.05)  |
| Stoke-on-Trent   | 2013        | 0.96<br>(0.91–1.02) |
| Stoke-on-Trent   | 2014        | 0.99<br>(0.91–1.08) |
| Stoke-on-Trent   | 2015        | 1.05<br>(0.95–1.15) |
| Stoke-on-Trent   | 2016        | 1.09<br>(0.98–1.2)  |

**Table 15 Ratio of adjusted to unadjusted 5q0 values for scaled locations by year**

| <b>Geography</b>   | <b>Year</b> | <b>Ratio</b>        |
|--------------------|-------------|---------------------|
| Stoke-on-Trent     | 2017        | 1.09<br>(0.93–1.26) |
| Telford and Wrekin | 1950        | 0.55<br>(0.46–0.66) |
| Telford and Wrekin | 1951        | 0.64<br>(0.53–0.77) |
| Telford and Wrekin | 1952        | 0.61<br>(0.5–0.72)  |
| Telford and Wrekin | 1953        | 0.61<br>(0.51–0.73) |
| Telford and Wrekin | 1954        | 0.58<br>(0.48–0.69) |
| Telford and Wrekin | 1955        | 0.58<br>(0.49–0.69) |
| Telford and Wrekin | 1956        | 0.58<br>(0.48–0.69) |
| Telford and Wrekin | 1957        | 0.59<br>(0.5–0.7)   |
| Telford and Wrekin | 1958        | 0.59<br>(0.49–0.69) |
| Telford and Wrekin | 1959        | 0.59<br>(0.5–0.7)   |
| Telford and Wrekin | 1960        | 0.61<br>(0.51–0.72) |
| Telford and Wrekin | 1961        | 0.62<br>(0.52–0.74) |
| Telford and Wrekin | 1962        | 0.65<br>(0.54–0.78) |
| Telford and Wrekin | 1963        | 0.66<br>(0.55–0.79) |
| Telford and Wrekin | 1964        | 0.65<br>(0.53–0.78) |
| Telford and Wrekin | 1965        | 0.64<br>(0.52–0.77) |
| Telford and Wrekin | 1966        | 0.67<br>(0.55–0.79) |
| Telford and Wrekin | 1967        | 0.66<br>(0.54–0.79) |
| Telford and Wrekin | 1968        | 0.7<br>(0.57–0.83)  |
| Telford and Wrekin | 1969        | 0.72<br>(0.59–0.86) |
| Telford and Wrekin | 1970        | 0.75<br>(0.62–0.89) |
| Telford and Wrekin | 1971        | 0.79<br>(0.66–0.93) |
| Telford and Wrekin | 1972        | 0.8<br>(0.68–0.93)  |
| Telford and Wrekin | 1973        | 0.81<br>(0.7–0.93)  |
| Telford and Wrekin | 1974        | 0.83<br>(0.72–0.95) |
| Telford and Wrekin | 1975        | 0.84<br>(0.73–0.95) |
| Telford and Wrekin | 1976        | 0.82<br>(0.72–0.93) |
| Telford and Wrekin | 1977        | 0.85<br>(0.76–0.95) |
| Telford and Wrekin | 1978        | 0.91<br>(0.82–1.0)  |
| Telford and Wrekin | 1979        | 0.94<br>(0.86–1.02) |



**Table 15 Ratio of adjusted to unadjusted 5q0 values for scaled locations by year**

| <b>Geography</b>   | <b>Year</b> | <b>Ratio</b>        |
|--------------------|-------------|---------------------|
| Telford and Wrekin | 1980        | 0.93<br>(0.86–0.99) |
| Telford and Wrekin | 1981        | 0.89<br>(0.83–0.94) |
| Telford and Wrekin | 1982        | 0.95<br>(0.9–1.01)  |
| Telford and Wrekin | 1983        | 0.97<br>(0.92–1.03) |
| Telford and Wrekin | 1984        | 0.96<br>(0.91–1.02) |
| Telford and Wrekin | 1985        | 0.96<br>(0.91–1.02) |
| Telford and Wrekin | 1986        | 0.98<br>(0.92–1.04) |
| Telford and Wrekin | 1987        | 0.99<br>(0.94–1.05) |
| Telford and Wrekin | 1988        | 1.05<br>(1.0–1.11)  |
| Telford and Wrekin | 1989        | 1.05<br>(0.99–1.1)  |
| Telford and Wrekin | 1990        | 1.07<br>(1.02–1.13) |
| Telford and Wrekin | 1991        | 1.02<br>(0.95–1.1)  |
| Telford and Wrekin | 1992        | 0.95<br>(0.89–1.01) |
| Telford and Wrekin | 1993        | 0.93<br>(0.86–1.0)  |
| Telford and Wrekin | 1994        | 0.94<br>(0.87–1.01) |
| Telford and Wrekin | 1995        | 0.95<br>(0.87–1.02) |
| Telford and Wrekin | 1996        | 0.98<br>(0.9–1.05)  |
| Telford and Wrekin | 1997        | 0.98<br>(0.91–1.05) |
| Telford and Wrekin | 1998        | 0.96<br>(0.89–1.03) |
| Telford and Wrekin | 1999        | 1.0<br>(0.93–1.08)  |
| Telford and Wrekin | 2000        | 1.0<br>(0.92–1.1)   |
| Telford and Wrekin | 2001        | 0.99<br>(0.93–1.06) |
| Telford and Wrekin | 2002        | 1.0<br>(0.94–1.08)  |
| Telford and Wrekin | 2003        | 1.08<br>(0.99–1.17) |
| Telford and Wrekin | 2004        | 1.04<br>(0.96–1.13) |
| Telford and Wrekin | 2005        | 1.03<br>(0.95–1.12) |
| Telford and Wrekin | 2006        | 1.04<br>(0.96–1.13) |
| Telford and Wrekin | 2007        | 1.04<br>(0.96–1.12) |
| Telford and Wrekin | 2008        | 1.05<br>(0.97–1.12) |
| Telford and Wrekin | 2009        | 1.01<br>(0.93–1.08) |
| Telford and Wrekin | 2010        | 0.97<br>(0.9–1.04)  |

**Table 15 Ratio of adjusted to unadjusted 5q0 values for scaled locations by year**

| <b>Geography</b>   | <b>Year</b> | <b>Ratio</b>        |
|--------------------|-------------|---------------------|
| Telford and Wrekin | 2011        | 0.98<br>(0.91–1.06) |
| Telford and Wrekin | 2012        | 0.97<br>(0.9–1.05)  |
| Telford and Wrekin | 2013        | 0.96<br>(0.91–1.02) |
| Telford and Wrekin | 2014        | 0.99<br>(0.91–1.08) |
| Telford and Wrekin | 2015        | 1.05<br>(0.95–1.15) |
| Telford and Wrekin | 2016        | 1.09<br>(0.98–1.2)  |
| Telford and Wrekin | 2017        | 1.09<br>(0.93–1.26) |
| Walsall            | 1950        | 0.55<br>(0.46–0.66) |
| Walsall            | 1951        | 0.65<br>(0.53–0.77) |
| Walsall            | 1952        | 0.61<br>(0.5–0.72)  |
| Walsall            | 1953        | 0.61<br>(0.51–0.73) |
| Walsall            | 1954        | 0.58<br>(0.48–0.69) |
| Walsall            | 1955        | 0.58<br>(0.49–0.69) |
| Walsall            | 1956        | 0.58<br>(0.48–0.69) |
| Walsall            | 1957        | 0.59<br>(0.5–0.7)   |
| Walsall            | 1958        | 0.59<br>(0.49–0.69) |
| Walsall            | 1959        | 0.59<br>(0.5–0.7)   |
| Walsall            | 1960        | 0.61<br>(0.51–0.72) |
| Walsall            | 1961        | 0.62<br>(0.52–0.74) |
| Walsall            | 1962        | 0.65<br>(0.54–0.78) |
| Walsall            | 1963        | 0.66<br>(0.55–0.79) |
| Walsall            | 1964        | 0.65<br>(0.53–0.78) |
| Walsall            | 1965        | 0.64<br>(0.52–0.77) |
| Walsall            | 1966        | 0.67<br>(0.55–0.79) |
| Walsall            | 1967        | 0.66<br>(0.54–0.79) |
| Walsall            | 1968        | 0.7<br>(0.57–0.83)  |
| Walsall            | 1969        | 0.72<br>(0.59–0.86) |
| Walsall            | 1970        | 0.75<br>(0.62–0.89) |
| Walsall            | 1971        | 0.79<br>(0.66–0.93) |
| Walsall            | 1972        | 0.8<br>(0.68–0.93)  |
| Walsall            | 1973        | 0.81<br>(0.7–0.93)  |

**Table 15 Ratio of adjusted to unadjusted 5q0 values for scaled locations by year**

| <b>Geography</b> | <b>Year</b> | <b>Ratio</b>        |
|------------------|-------------|---------------------|
| Walsall          | 1974        | 0.83<br>(0.72–0.95) |
| Walsall          | 1975        | 0.84<br>(0.73–0.95) |
| Walsall          | 1976        | 0.82<br>(0.72–0.93) |
| Walsall          | 1977        | 0.85<br>(0.76–0.95) |
| Walsall          | 1978        | 0.91<br>(0.82–1.0)  |
| Walsall          | 1979        | 0.94<br>(0.86–1.02) |
| Walsall          | 1980        | 0.93<br>(0.86–0.99) |
| Walsall          | 1981        | 0.89<br>(0.83–0.94) |
| Walsall          | 1982        | 0.95<br>(0.9–1.01)  |
| Walsall          | 1983        | 0.97<br>(0.92–1.03) |
| Walsall          | 1984        | 0.96<br>(0.91–1.02) |
| Walsall          | 1985        | 0.96<br>(0.91–1.02) |
| Walsall          | 1986        | 0.98<br>(0.92–1.04) |
| Walsall          | 1987        | 0.99<br>(0.94–1.05) |
| Walsall          | 1988        | 1.05<br>(1.0–1.11)  |
| Walsall          | 1989        | 1.05<br>(0.99–1.1)  |
| Walsall          | 1990        | 1.07<br>(1.02–1.13) |
| Walsall          | 1991        | 1.02<br>(0.95–1.1)  |
| Walsall          | 1992        | 0.95<br>(0.89–1.01) |
| Walsall          | 1993        | 0.93<br>(0.86–1.0)  |
| Walsall          | 1994        | 0.94<br>(0.87–1.01) |
| Walsall          | 1995        | 0.95<br>(0.87–1.02) |
| Walsall          | 1996        | 0.98<br>(0.9–1.05)  |
| Walsall          | 1997        | 0.98<br>(0.91–1.05) |
| Walsall          | 1998        | 0.96<br>(0.89–1.03) |
| Walsall          | 1999        | 1.0<br>(0.93–1.08)  |
| Walsall          | 2000        | 1.0<br>(0.92–1.1)   |
| Walsall          | 2001        | 0.99<br>(0.93–1.06) |
| Walsall          | 2002        | 1.0<br>(0.94–1.08)  |
| Walsall          | 2003        | 1.08<br>(0.99–1.17) |
| Walsall          | 2004        | 1.04<br>(0.96–1.13) |

**Table 15 Ratio of adjusted to unadjusted 5q0 values for scaled locations by year**

| <b>Geography</b> | <b>Year</b> | <b>Ratio</b>        |
|------------------|-------------|---------------------|
| Walsall          | 2005        | 1.03<br>(0.95–1.12) |
| Walsall          | 2006        | 1.04<br>(0.96–1.13) |
| Walsall          | 2007        | 1.04<br>(0.96–1.12) |
| Walsall          | 2008        | 1.05<br>(0.97–1.12) |
| Walsall          | 2009        | 1.01<br>(0.93–1.08) |
| Walsall          | 2010        | 0.97<br>(0.9–1.04)  |
| Walsall          | 2011        | 0.98<br>(0.91–1.06) |
| Walsall          | 2012        | 0.97<br>(0.9–1.05)  |
| Walsall          | 2013        | 0.96<br>(0.91–1.02) |
| Walsall          | 2014        | 0.99<br>(0.91–1.08) |
| Walsall          | 2015        | 1.05<br>(0.95–1.15) |
| Walsall          | 2016        | 1.09<br>(0.98–1.2)  |
| Walsall          | 2017        | 1.09<br>(0.93–1.26) |
| Warwickshire     | 1950        | 0.55<br>(0.46–0.66) |
| Warwickshire     | 1951        | 0.64<br>(0.53–0.77) |
| Warwickshire     | 1952        | 0.6<br>(0.5–0.72)   |
| Warwickshire     | 1953        | 0.61<br>(0.5–0.73)  |
| Warwickshire     | 1954        | 0.58<br>(0.48–0.69) |
| Warwickshire     | 1955        | 0.58<br>(0.49–0.69) |
| Warwickshire     | 1956        | 0.58<br>(0.48–0.68) |
| Warwickshire     | 1957        | 0.59<br>(0.5–0.7)   |
| Warwickshire     | 1958        | 0.58<br>(0.49–0.69) |
| Warwickshire     | 1959        | 0.59<br>(0.5–0.7)   |
| Warwickshire     | 1960        | 0.61<br>(0.51–0.72) |
| Warwickshire     | 1961        | 0.62<br>(0.52–0.74) |
| Warwickshire     | 1962        | 0.65<br>(0.53–0.78) |
| Warwickshire     | 1963        | 0.66<br>(0.55–0.79) |
| Warwickshire     | 1964        | 0.65<br>(0.53–0.78) |
| Warwickshire     | 1965        | 0.64<br>(0.52–0.77) |
| Warwickshire     | 1966        | 0.67<br>(0.54–0.79) |
| Warwickshire     | 1967        | 0.66<br>(0.54–0.79) |

**Table 15 Ratio of adjusted to unadjusted 5q0 values for scaled locations by year**

| <b>Geography</b> | <b>Year</b> | <b>Ratio</b>        |
|------------------|-------------|---------------------|
| Warwickshire     | 1968        | 0.7<br>(0.57–0.83)  |
| Warwickshire     | 1969        | 0.72<br>(0.59–0.86) |
| Warwickshire     | 1970        | 0.75<br>(0.62–0.89) |
| Warwickshire     | 1971        | 0.79<br>(0.65–0.93) |
| Warwickshire     | 1972        | 0.8<br>(0.68–0.93)  |
| Warwickshire     | 1973        | 0.81<br>(0.7–0.93)  |
| Warwickshire     | 1974        | 0.83<br>(0.72–0.95) |
| Warwickshire     | 1975        | 0.84<br>(0.73–0.95) |
| Warwickshire     | 1976        | 0.82<br>(0.71–0.93) |
| Warwickshire     | 1977        | 0.85<br>(0.76–0.95) |
| Warwickshire     | 1978        | 0.91<br>(0.82–1.0)  |
| Warwickshire     | 1979        | 0.94<br>(0.86–1.02) |
| Warwickshire     | 1980        | 0.93<br>(0.86–0.99) |
| Warwickshire     | 1981        | 0.89<br>(0.83–0.94) |
| Warwickshire     | 1982        | 0.95<br>(0.9–1.01)  |
| Warwickshire     | 1983        | 0.97<br>(0.92–1.03) |
| Warwickshire     | 1984        | 0.96<br>(0.91–1.02) |
| Warwickshire     | 1985        | 0.96<br>(0.91–1.02) |
| Warwickshire     | 1986        | 0.98<br>(0.92–1.04) |
| Warwickshire     | 1987        | 0.99<br>(0.94–1.05) |
| Warwickshire     | 1988        | 1.05<br>(1.0–1.11)  |
| Warwickshire     | 1989        | 1.05<br>(0.99–1.1)  |
| Warwickshire     | 1990        | 1.07<br>(1.02–1.13) |
| Warwickshire     | 1991        | 1.02<br>(0.95–1.1)  |
| Warwickshire     | 1992        | 0.95<br>(0.89–1.01) |
| Warwickshire     | 1993        | 0.93<br>(0.86–1.0)  |
| Warwickshire     | 1994        | 0.94<br>(0.87–1.01) |
| Warwickshire     | 1995        | 0.95<br>(0.87–1.02) |
| Warwickshire     | 1996        | 0.98<br>(0.9–1.05)  |
| Warwickshire     | 1997        | 0.98<br>(0.91–1.05) |
| Warwickshire     | 1998        | 0.96<br>(0.89–1.03) |

**Table 15 Ratio of adjusted to unadjusted 5q0 values for scaled locations by year**

| <b>Geography</b> | <b>Year</b> | <b>Ratio</b>        |
|------------------|-------------|---------------------|
| Warwickshire     | 1999        | 1.0<br>(0.93–1.08)  |
| Warwickshire     | 2000        | 1.0<br>(0.92–1.1)   |
| Warwickshire     | 2001        | 0.99<br>(0.93–1.06) |
| Warwickshire     | 2002        | 1.0<br>(0.94–1.08)  |
| Warwickshire     | 2003        | 1.08<br>(0.99–1.17) |
| Warwickshire     | 2004        | 1.04<br>(0.96–1.13) |
| Warwickshire     | 2005        | 1.03<br>(0.95–1.12) |
| Warwickshire     | 2006        | 1.04<br>(0.96–1.13) |
| Warwickshire     | 2007        | 1.04<br>(0.96–1.12) |
| Warwickshire     | 2008        | 1.05<br>(0.97–1.12) |
| Warwickshire     | 2009        | 1.01<br>(0.93–1.08) |
| Warwickshire     | 2010        | 0.97<br>(0.9–1.04)  |
| Warwickshire     | 2011        | 0.98<br>(0.91–1.06) |
| Warwickshire     | 2012        | 0.97<br>(0.9–1.05)  |
| Warwickshire     | 2013        | 0.96<br>(0.91–1.02) |
| Warwickshire     | 2014        | 0.99<br>(0.91–1.08) |
| Warwickshire     | 2015        | 1.05<br>(0.95–1.15) |
| Warwickshire     | 2016        | 1.09<br>(0.98–1.2)  |
| Warwickshire     | 2017        | 1.09<br>(0.93–1.26) |
| Wolverhampton    | 1950        | 0.55<br>(0.46–0.66) |
| Wolverhampton    | 1951        | 0.64<br>(0.53–0.77) |
| Wolverhampton    | 1952        | 0.61<br>(0.5–0.72)  |
| Wolverhampton    | 1953        | 0.61<br>(0.51–0.73) |
| Wolverhampton    | 1954        | 0.58<br>(0.48–0.69) |
| Wolverhampton    | 1955        | 0.58<br>(0.49–0.69) |
| Wolverhampton    | 1956        | 0.58<br>(0.48–0.69) |
| Wolverhampton    | 1957        | 0.59<br>(0.5–0.7)   |
| Wolverhampton    | 1958        | 0.59<br>(0.49–0.69) |
| Wolverhampton    | 1959        | 0.59<br>(0.5–0.7)   |
| Wolverhampton    | 1960        | 0.61<br>(0.51–0.72) |
| Wolverhampton    | 1961        | 0.62<br>(0.52–0.74) |

**Table 15 Ratio of adjusted to unadjusted 5q0 values for scaled locations by year**

| <b>Geography</b> | <b>Year</b> | <b>Ratio</b>        |
|------------------|-------------|---------------------|
| Wolverhampton    | 1962        | 0.65<br>(0.54–0.78) |
| Wolverhampton    | 1963        | 0.66<br>(0.55–0.79) |
| Wolverhampton    | 1964        | 0.65<br>(0.53–0.78) |
| Wolverhampton    | 1965        | 0.64<br>(0.52–0.77) |
| Wolverhampton    | 1966        | 0.67<br>(0.55–0.79) |
| Wolverhampton    | 1967        | 0.66<br>(0.54–0.79) |
| Wolverhampton    | 1968        | 0.7<br>(0.57–0.83)  |
| Wolverhampton    | 1969        | 0.72<br>(0.59–0.86) |
| Wolverhampton    | 1970        | 0.75<br>(0.62–0.89) |
| Wolverhampton    | 1971        | 0.79<br>(0.65–0.93) |
| Wolverhampton    | 1972        | 0.8<br>(0.68–0.93)  |
| Wolverhampton    | 1973        | 0.81<br>(0.7–0.93)  |
| Wolverhampton    | 1974        | 0.83<br>(0.72–0.95) |
| Wolverhampton    | 1975        | 0.84<br>(0.73–0.95) |
| Wolverhampton    | 1976        | 0.82<br>(0.72–0.93) |
| Wolverhampton    | 1977        | 0.85<br>(0.76–0.95) |
| Wolverhampton    | 1978        | 0.91<br>(0.82–1.0)  |
| Wolverhampton    | 1979        | 0.94<br>(0.86–1.02) |
| Wolverhampton    | 1980        | 0.93<br>(0.86–0.99) |
| Wolverhampton    | 1981        | 0.89<br>(0.83–0.94) |
| Wolverhampton    | 1982        | 0.95<br>(0.9–1.01)  |
| Wolverhampton    | 1983        | 0.97<br>(0.92–1.03) |
| Wolverhampton    | 1984        | 0.96<br>(0.91–1.02) |
| Wolverhampton    | 1985        | 0.96<br>(0.91–1.02) |
| Wolverhampton    | 1986        | 0.98<br>(0.92–1.04) |
| Wolverhampton    | 1987        | 0.99<br>(0.94–1.05) |
| Wolverhampton    | 1988        | 1.05<br>(1.0–1.11)  |
| Wolverhampton    | 1989        | 1.05<br>(0.99–1.1)  |
| Wolverhampton    | 1990        | 1.07<br>(1.02–1.13) |
| Wolverhampton    | 1991        | 1.02<br>(0.95–1.1)  |
| Wolverhampton    | 1992        | 0.95<br>(0.89–1.01) |

**Table 15 Ratio of adjusted to unadjusted 5q0 values for scaled locations by year**

| <b>Geography</b> | <b>Year</b> | <b>Ratio</b>        |
|------------------|-------------|---------------------|
| Wolverhampton    | 1993        | 0.93<br>(0.86–1.0)  |
| Wolverhampton    | 1994        | 0.94<br>(0.87–1.01) |
| Wolverhampton    | 1995        | 0.95<br>(0.87–1.02) |
| Wolverhampton    | 1996        | 0.98<br>(0.9–1.05)  |
| Wolverhampton    | 1997        | 0.98<br>(0.91–1.05) |
| Wolverhampton    | 1998        | 0.96<br>(0.89–1.03) |
| Wolverhampton    | 1999        | 1.0<br>(0.93–1.08)  |
| Wolverhampton    | 2000        | 1.0<br>(0.92–1.1)   |
| Wolverhampton    | 2001        | 0.99<br>(0.93–1.06) |
| Wolverhampton    | 2002        | 1.0<br>(0.94–1.08)  |
| Wolverhampton    | 2003        | 1.08<br>(0.99–1.17) |
| Wolverhampton    | 2004        | 1.04<br>(0.96–1.13) |
| Wolverhampton    | 2005        | 1.03<br>(0.95–1.12) |
| Wolverhampton    | 2006        | 1.04<br>(0.96–1.13) |
| Wolverhampton    | 2007        | 1.04<br>(0.96–1.12) |
| Wolverhampton    | 2008        | 1.05<br>(0.97–1.12) |
| Wolverhampton    | 2009        | 1.01<br>(0.93–1.08) |
| Wolverhampton    | 2010        | 0.97<br>(0.9–1.04)  |
| Wolverhampton    | 2011        | 0.98<br>(0.91–1.06) |
| Wolverhampton    | 2012        | 0.97<br>(0.9–1.05)  |
| Wolverhampton    | 2013        | 0.96<br>(0.91–1.02) |
| Wolverhampton    | 2014        | 0.99<br>(0.91–1.08) |
| Wolverhampton    | 2015        | 1.05<br>(0.95–1.15) |
| Wolverhampton    | 2016        | 1.09<br>(0.98–1.2)  |
| Wolverhampton    | 2017        | 1.09<br>(0.93–1.26) |
| Worcestershire   | 1950        | 0.55<br>(0.46–0.66) |
| Worcestershire   | 1951        | 0.64<br>(0.53–0.77) |
| Worcestershire   | 1952        | 0.6<br>(0.5–0.72)   |
| Worcestershire   | 1953        | 0.61<br>(0.5–0.73)  |
| Worcestershire   | 1954        | 0.58<br>(0.48–0.69) |
| Worcestershire   | 1955        | 0.58<br>(0.49–0.69) |



**Table 15 Ratio of adjusted to unadjusted 5q0 values for scaled locations by year**

| <b>Geography</b> | <b>Year</b> | <b>Ratio</b>        |
|------------------|-------------|---------------------|
| Worcestershire   | 1956        | 0.58<br>(0.48–0.68) |
| Worcestershire   | 1957        | 0.59<br>(0.5–0.7)   |
| Worcestershire   | 1958        | 0.58<br>(0.49–0.69) |
| Worcestershire   | 1959        | 0.59<br>(0.5–0.7)   |
| Worcestershire   | 1960        | 0.61<br>(0.51–0.72) |
| Worcestershire   | 1961        | 0.62<br>(0.52–0.74) |
| Worcestershire   | 1962        | 0.65<br>(0.53–0.78) |
| Worcestershire   | 1963        | 0.66<br>(0.55–0.79) |
| Worcestershire   | 1964        | 0.65<br>(0.53–0.78) |
| Worcestershire   | 1965        | 0.64<br>(0.52–0.77) |
| Worcestershire   | 1966        | 0.67<br>(0.54–0.79) |
| Worcestershire   | 1967        | 0.66<br>(0.54–0.79) |
| Worcestershire   | 1968        | 0.7<br>(0.57–0.83)  |
| Worcestershire   | 1969        | 0.72<br>(0.59–0.86) |
| Worcestershire   | 1970        | 0.75<br>(0.62–0.89) |
| Worcestershire   | 1971        | 0.79<br>(0.65–0.93) |
| Worcestershire   | 1972        | 0.8<br>(0.68–0.93)  |
| Worcestershire   | 1973        | 0.81<br>(0.7–0.93)  |
| Worcestershire   | 1974        | 0.83<br>(0.72–0.95) |
| Worcestershire   | 1975        | 0.84<br>(0.73–0.95) |
| Worcestershire   | 1976        | 0.82<br>(0.71–0.93) |
| Worcestershire   | 1977        | 0.85<br>(0.76–0.95) |
| Worcestershire   | 1978        | 0.91<br>(0.82–1.0)  |
| Worcestershire   | 1979        | 0.94<br>(0.86–1.02) |
| Worcestershire   | 1980        | 0.93<br>(0.86–0.99) |
| Worcestershire   | 1981        | 0.89<br>(0.83–0.94) |
| Worcestershire   | 1982        | 0.95<br>(0.9–1.01)  |
| Worcestershire   | 1983        | 0.97<br>(0.92–1.03) |
| Worcestershire   | 1984        | 0.96<br>(0.91–1.02) |
| Worcestershire   | 1985        | 0.96<br>(0.91–1.02) |
| Worcestershire   | 1986        | 0.98<br>(0.92–1.04) |

**Table 15 Ratio of adjusted to unadjusted 5q0 values for scaled locations by year**

| <b>Geography</b> | <b>Year</b> | <b>Ratio</b>        |
|------------------|-------------|---------------------|
| Worcestershire   | 1987        | 0.99<br>(0.94–1.05) |
| Worcestershire   | 1988        | 1.05<br>(1.0–1.11)  |
| Worcestershire   | 1989        | 1.05<br>(0.99–1.1)  |
| Worcestershire   | 1990        | 1.07<br>(1.02–1.13) |
| Worcestershire   | 1991        | 1.02<br>(0.95–1.1)  |
| Worcestershire   | 1992        | 0.95<br>(0.89–1.01) |
| Worcestershire   | 1993        | 0.93<br>(0.86–1.0)  |
| Worcestershire   | 1994        | 0.94<br>(0.87–1.01) |
| Worcestershire   | 1995        | 0.95<br>(0.87–1.02) |
| Worcestershire   | 1996        | 0.98<br>(0.9–1.05)  |
| Worcestershire   | 1997        | 0.98<br>(0.91–1.05) |
| Worcestershire   | 1998        | 0.96<br>(0.89–1.03) |
| Worcestershire   | 1999        | 1.0<br>(0.93–1.08)  |
| Worcestershire   | 2000        | 1.0<br>(0.92–1.1)   |
| Worcestershire   | 2001        | 0.99<br>(0.93–1.06) |
| Worcestershire   | 2002        | 1.0<br>(0.94–1.08)  |
| Worcestershire   | 2003        | 1.08<br>(0.99–1.17) |
| Worcestershire   | 2004        | 1.04<br>(0.96–1.13) |
| Worcestershire   | 2005        | 1.03<br>(0.95–1.12) |
| Worcestershire   | 2006        | 1.04<br>(0.96–1.13) |
| Worcestershire   | 2007        | 1.04<br>(0.96–1.12) |
| Worcestershire   | 2008        | 1.05<br>(0.97–1.12) |
| Worcestershire   | 2009        | 1.01<br>(0.93–1.08) |
| Worcestershire   | 2010        | 0.97<br>(0.9–1.04)  |
| Worcestershire   | 2011        | 0.98<br>(0.91–1.06) |
| Worcestershire   | 2012        | 0.97<br>(0.9–1.05)  |
| Worcestershire   | 2013        | 0.96<br>(0.91–1.02) |
| Worcestershire   | 2014        | 0.99<br>(0.91–1.08) |
| Worcestershire   | 2015        | 1.05<br>(0.95–1.15) |
| Worcestershire   | 2016        | 1.09<br>(0.98–1.2)  |
| Worcestershire   | 2017        | 1.09<br>(0.93–1.26) |

**Table 15 Ratio of adjusted to unadjusted 5q0 values for scaled locations by year**

| <b>Geography</b>         | <b>Year</b> | <b>Ratio</b>        |
|--------------------------|-------------|---------------------|
| Yorkshire and the Humber | 1950        | 0.9<br>(0.74–1.08)  |
| Yorkshire and the Humber | 1951        | 1.04<br>(0.85–1.25) |
| Yorkshire and the Humber | 1952        | 0.97<br>(0.8–1.17)  |
| Yorkshire and the Humber | 1953        | 0.98<br>(0.81–1.17) |
| Yorkshire and the Humber | 1954        | 0.91<br>(0.75–1.1)  |
| Yorkshire and the Humber | 1955        | 0.91<br>(0.74–1.11) |
| Yorkshire and the Humber | 1956        | 0.89<br>(0.73–1.09) |
| Yorkshire and the Humber | 1957        | 0.9<br>(0.73–1.1)   |
| Yorkshire and the Humber | 1958        | 0.88<br>(0.71–1.07) |
| Yorkshire and the Humber | 1959        | 0.87<br>(0.71–1.06) |
| Yorkshire and the Humber | 1960        | 0.88<br>(0.71–1.06) |
| Yorkshire and the Humber | 1961        | 0.89<br>(0.72–1.07) |
| Yorkshire and the Humber | 1962        | 0.91<br>(0.74–1.09) |
| Yorkshire and the Humber | 1963        | 0.91<br>(0.75–1.09) |
| Yorkshire and the Humber | 1964        | 0.88<br>(0.72–1.05) |
| Yorkshire and the Humber | 1965        | 0.85<br>(0.69–1.02) |
| Yorkshire and the Humber | 1966        | 0.87<br>(0.71–1.04) |
| Yorkshire and the Humber | 1967        | 0.85<br>(0.69–1.02) |
| Yorkshire and the Humber | 1968        | 0.88<br>(0.72–1.05) |
| Yorkshire and the Humber | 1969        | 0.89<br>(0.73–1.06) |
| Yorkshire and the Humber | 1970        | 0.91<br>(0.76–1.08) |
| Yorkshire and the Humber | 1971        | 0.93<br>(0.78–1.1)  |
| Yorkshire and the Humber | 1972        | 0.93<br>(0.78–1.11) |
| Yorkshire and the Humber | 1973        | 0.93<br>(0.78–1.12) |
| Yorkshire and the Humber | 1974        | 0.94<br>(0.79–1.11) |
| Yorkshire and the Humber | 1975        | 0.93<br>(0.79–1.1)  |
| Yorkshire and the Humber | 1976        | 0.9<br>(0.77–1.04)  |
| Yorkshire and the Humber | 1977        | 0.92<br>(0.8–1.04)  |
| Yorkshire and the Humber | 1978        | 0.96<br>(0.85–1.08) |
| Yorkshire and the Humber | 1979        | 0.98<br>(0.9–1.08)  |
| Yorkshire and the Humber | 1980        | 0.97<br>(0.9–1.04)  |

**Table 15 Ratio of adjusted to unadjusted 5q0 values for scaled locations by year**

| <b>Geography</b>         | <b>Year</b> | <b>Ratio</b>        |
|--------------------------|-------------|---------------------|
| Yorkshire and the Humber | 1981        | 0.93<br>(0.89–0.97) |
| Yorkshire and the Humber | 1982        | 0.98<br>(0.95–1.01) |
| Yorkshire and the Humber | 1983        | 1.0<br>(0.97–1.03)  |
| Yorkshire and the Humber | 1984        | 0.98<br>(0.95–1.01) |
| Yorkshire and the Humber | 1985        | 0.99<br>(0.95–1.02) |
| Yorkshire and the Humber | 1986        | 0.99<br>(0.97–1.02) |
| Yorkshire and the Humber | 1987        | 0.99<br>(0.96–1.01) |
| Yorkshire and the Humber | 1988        | 1.0<br>(0.97–1.03)  |
| Yorkshire and the Humber | 1989        | 0.99<br>(0.97–1.01) |
| Yorkshire and the Humber | 1990        | 1.0<br>(0.98–1.02)  |
| Yorkshire and the Humber | 1991        | 1.0<br>(0.98–1.02)  |
| Yorkshire and the Humber | 1992        | 0.97<br>(0.95–1.0)  |
| Yorkshire and the Humber | 1993        | 1.0<br>(0.97–1.02)  |
| Yorkshire and the Humber | 1994        | 1.01<br>(0.98–1.04) |
| Yorkshire and the Humber | 1995        | 1.02<br>(0.99–1.05) |
| Yorkshire and the Humber | 1996        | 1.04<br>(1.01–1.06) |
| Yorkshire and the Humber | 1997        | 1.01<br>(0.97–1.05) |
| Yorkshire and the Humber | 1998        | 1.0<br>(0.96–1.03)  |
| Yorkshire and the Humber | 1999        | 1.02<br>(0.99–1.06) |
| Yorkshire and the Humber | 2000        | 1.01<br>(0.95–1.09) |
| Yorkshire and the Humber | 2001        | 1.0<br>(0.96–1.04)  |
| Yorkshire and the Humber | 2002        | 0.98<br>(0.95–1.02) |
| Yorkshire and the Humber | 2003        | 1.02<br>(0.98–1.06) |
| Yorkshire and the Humber | 2004        | 0.99<br>(0.96–1.02) |
| Yorkshire and the Humber | 2005        | 0.99<br>(0.95–1.03) |
| Yorkshire and the Humber | 2006        | 1.01<br>(0.97–1.05) |
| Yorkshire and the Humber | 2007        | 1.01<br>(0.98–1.05) |
| Yorkshire and the Humber | 2008        | 1.01<br>(0.98–1.04) |
| Yorkshire and the Humber | 2009        | 1.0<br>(0.96–1.04)  |
| Yorkshire and the Humber | 2010        | 0.98<br>(0.95–1.02) |
| Yorkshire and the Humber | 2011        | 1.0<br>(0.96–1.04)  |

**Table 15 Ratio of adjusted to unadjusted 5q0 values for scaled locations by year**

| <b>Geography</b>         | <b>Year</b> | <b>Ratio</b>        |
|--------------------------|-------------|---------------------|
| Yorkshire and the Humber | 2012        | 1.0<br>(0.96–1.04)  |
| Yorkshire and the Humber | 2013        | 0.99<br>(0.95–1.02) |
| Yorkshire and the Humber | 2014        | 0.99<br>(0.95–1.03) |
| Yorkshire and the Humber | 2015        | 1.0<br>(0.96–1.04)  |
| Yorkshire and the Humber | 2016        | 1.0<br>(0.94–1.05)  |
| Yorkshire and the Humber | 2017        | 1.02<br>(0.92–1.14) |
| Barnsley                 | 1950        | 0.56<br>(0.47–0.67) |
| Barnsley                 | 1951        | 0.66<br>(0.54–0.79) |
| Barnsley                 | 1952        | 0.62<br>(0.51–0.74) |
| Barnsley                 | 1953        | 0.62<br>(0.52–0.75) |
| Barnsley                 | 1954        | 0.59<br>(0.49–0.7)  |
| Barnsley                 | 1955        | 0.59<br>(0.5–0.7)   |
| Barnsley                 | 1956        | 0.59<br>(0.5–0.69)  |
| Barnsley                 | 1957        | 0.6<br>(0.51–0.71)  |
| Barnsley                 | 1958        | 0.6<br>(0.51–0.7)   |
| Barnsley                 | 1959        | 0.6<br>(0.51–0.71)  |
| Barnsley                 | 1960        | 0.62<br>(0.52–0.73) |
| Barnsley                 | 1961        | 0.63<br>(0.53–0.75) |
| Barnsley                 | 1962        | 0.66<br>(0.54–0.79) |
| Barnsley                 | 1963        | 0.67<br>(0.55–0.8)  |
| Barnsley                 | 1964        | 0.66<br>(0.54–0.79) |
| Barnsley                 | 1965        | 0.65<br>(0.53–0.78) |
| Barnsley                 | 1966        | 0.68<br>(0.55–0.81) |
| Barnsley                 | 1967        | 0.67<br>(0.55–0.81) |
| Barnsley                 | 1968        | 0.71<br>(0.58–0.85) |
| Barnsley                 | 1969        | 0.73<br>(0.6–0.87)  |
| Barnsley                 | 1970        | 0.77<br>(0.63–0.91) |
| Barnsley                 | 1971        | 0.8<br>(0.67–0.95)  |
| Barnsley                 | 1972        | 0.81<br>(0.69–0.94) |
| Barnsley                 | 1973        | 0.82<br>(0.71–0.95) |
| Barnsley                 | 1974        | 0.85<br>(0.73–0.97) |

**Table 15 Ratio of adjusted to unadjusted 5q0 values for scaled locations by year**

| <b>Geography</b> | <b>Year</b> | <b>Ratio</b>        |
|------------------|-------------|---------------------|
| Barnsley         | 1975        | 0.86<br>(0.74–0.97) |
| Barnsley         | 1976        | 0.84<br>(0.73–0.94) |
| Barnsley         | 1977        | 0.87<br>(0.77–0.96) |
| Barnsley         | 1978        | 0.92<br>(0.84–1.02) |
| Barnsley         | 1979        | 0.96<br>(0.87–1.05) |
| Barnsley         | 1980        | 0.95<br>(0.86–1.05) |
| Barnsley         | 1981        | 0.91<br>(0.84–0.98) |
| Barnsley         | 1982        | 0.94<br>(0.87–1.02) |
| Barnsley         | 1983        | 0.96<br>(0.9–1.02)  |
| Barnsley         | 1984        | 0.93<br>(0.88–1.0)  |
| Barnsley         | 1985        | 0.98<br>(0.92–1.04) |
| Barnsley         | 1986        | 1.02<br>(0.96–1.08) |
| Barnsley         | 1987        | 1.02<br>(0.96–1.09) |
| Barnsley         | 1988        | 1.02<br>(0.95–1.09) |
| Barnsley         | 1989        | 1.0<br>(0.93–1.08)  |
| Barnsley         | 1990        | 1.02<br>(0.96–1.08) |
| Barnsley         | 1991        | 1.01<br>(0.94–1.07) |
| Barnsley         | 1992        | 0.91<br>(0.85–0.98) |
| Barnsley         | 1993        | 0.95<br>(0.87–1.04) |
| Barnsley         | 1994        | 0.98<br>(0.9–1.05)  |
| Barnsley         | 1995        | 0.97<br>(0.89–1.06) |
| Barnsley         | 1996        | 1.0<br>(0.92–1.09)  |
| Barnsley         | 1997        | 0.97<br>(0.89–1.07) |
| Barnsley         | 1998        | 0.99<br>(0.91–1.08) |
| Barnsley         | 1999        | 1.01<br>(0.93–1.1)  |
| Barnsley         | 2000        | 1.04<br>(0.93–1.14) |
| Barnsley         | 2001        | 1.01<br>(0.94–1.08) |
| Barnsley         | 2002        | 1.0<br>(0.93–1.08)  |
| Barnsley         | 2003        | 1.05<br>(0.96–1.14) |
| Barnsley         | 2004        | 1.01<br>(0.93–1.1)  |
| Barnsley         | 2005        | 1.04<br>(0.94–1.14) |

**Table 15 Ratio of adjusted to unadjusted 5q0 values for scaled locations by year**

| <b>Geography</b> | <b>Year</b> | <b>Ratio</b>        |
|------------------|-------------|---------------------|
| Barnsley         | 2006        | 1.06<br>(0.97–1.17) |
| Barnsley         | 2007        | 1.07<br>(0.97–1.18) |
| Barnsley         | 2008        | 1.05<br>(0.96–1.16) |
| Barnsley         | 2009        | 1.04<br>(0.95–1.14) |
| Barnsley         | 2010        | 1.01<br>(0.92–1.09) |
| Barnsley         | 2011        | 1.0<br>(0.91–1.09)  |
| Barnsley         | 2012        | 0.96<br>(0.87–1.05) |
| Barnsley         | 2013        | 0.94<br>(0.86–1.02) |
| Barnsley         | 2014        | 0.94<br>(0.85–1.03) |
| Barnsley         | 2015        | 0.97<br>(0.88–1.07) |
| Barnsley         | 2016        | 0.92<br>(0.83–1.01) |
| Barnsley         | 2017        | 0.96<br>(0.82–1.11) |
| Bradford         | 1950        | 0.56<br>(0.47–0.67) |
| Bradford         | 1951        | 0.66<br>(0.54–0.79) |
| Bradford         | 1952        | 0.62<br>(0.51–0.74) |
| Bradford         | 1953        | 0.62<br>(0.52–0.75) |
| Bradford         | 1954        | 0.59<br>(0.49–0.7)  |
| Bradford         | 1955        | 0.59<br>(0.5–0.7)   |
| Bradford         | 1956        | 0.59<br>(0.5–0.69)  |
| Bradford         | 1957        | 0.6<br>(0.51–0.71)  |
| Bradford         | 1958        | 0.6<br>(0.51–0.7)   |
| Bradford         | 1959        | 0.6<br>(0.51–0.71)  |
| Bradford         | 1960        | 0.62<br>(0.52–0.73) |
| Bradford         | 1961        | 0.64<br>(0.53–0.75) |
| Bradford         | 1962        | 0.66<br>(0.55–0.79) |
| Bradford         | 1963        | 0.67<br>(0.55–0.8)  |
| Bradford         | 1964        | 0.66<br>(0.54–0.79) |
| Bradford         | 1965        | 0.65<br>(0.53–0.78) |
| Bradford         | 1966        | 0.68<br>(0.55–0.81) |
| Bradford         | 1967        | 0.68<br>(0.55–0.81) |
| Bradford         | 1968        | 0.71<br>(0.58–0.85) |

**Table 15 Ratio of adjusted to unadjusted 5q0 values for scaled locations by year**

| <b>Geography</b> | <b>Year</b> | <b>Ratio</b>        |
|------------------|-------------|---------------------|
| Bradford         | 1969        | 0.73<br>(0.6–0.87)  |
| Bradford         | 1970        | 0.77<br>(0.64–0.91) |
| Bradford         | 1971        | 0.8<br>(0.67–0.95)  |
| Bradford         | 1972        | 0.81<br>(0.69–0.94) |
| Bradford         | 1973        | 0.82<br>(0.71–0.95) |
| Bradford         | 1974        | 0.85<br>(0.73–0.97) |
| Bradford         | 1975        | 0.86<br>(0.74–0.97) |
| Bradford         | 1976        | 0.84<br>(0.73–0.94) |
| Bradford         | 1977        | 0.87<br>(0.77–0.96) |
| Bradford         | 1978        | 0.92<br>(0.84–1.02) |
| Bradford         | 1979        | 0.96<br>(0.87–1.05) |
| Bradford         | 1980        | 0.95<br>(0.86–1.05) |
| Bradford         | 1981        | 0.91<br>(0.84–0.98) |
| Bradford         | 1982        | 0.94<br>(0.87–1.02) |
| Bradford         | 1983        | 0.96<br>(0.9–1.02)  |
| Bradford         | 1984        | 0.93<br>(0.88–1.0)  |
| Bradford         | 1985        | 0.98<br>(0.92–1.04) |
| Bradford         | 1986        | 1.02<br>(0.96–1.08) |
| Bradford         | 1987        | 1.02<br>(0.96–1.09) |
| Bradford         | 1988        | 1.02<br>(0.95–1.09) |
| Bradford         | 1989        | 1.0<br>(0.93–1.08)  |
| Bradford         | 1990        | 1.02<br>(0.96–1.08) |
| Bradford         | 1991        | 1.01<br>(0.94–1.07) |
| Bradford         | 1992        | 0.91<br>(0.85–0.98) |
| Bradford         | 1993        | 0.95<br>(0.87–1.04) |
| Bradford         | 1994        | 0.98<br>(0.9–1.05)  |
| Bradford         | 1995        | 0.97<br>(0.89–1.06) |
| Bradford         | 1996        | 1.0<br>(0.92–1.09)  |
| Bradford         | 1997        | 0.97<br>(0.89–1.07) |
| Bradford         | 1998        | 0.99<br>(0.91–1.08) |
| Bradford         | 1999        | 1.01<br>(0.93–1.1)  |



**Table 15 Ratio of adjusted to unadjusted 5q0 values for scaled locations by year**

| <b>Geography</b> | <b>Year</b> | <b>Ratio</b>        |
|------------------|-------------|---------------------|
| Bradford         | 2000        | 1.04<br>(0.93–1.14) |
| Bradford         | 2001        | 1.01<br>(0.94–1.08) |
| Bradford         | 2002        | 1.0<br>(0.93–1.08)  |
| Bradford         | 2003        | 1.05<br>(0.96–1.14) |
| Bradford         | 2004        | 1.01<br>(0.93–1.1)  |
| Bradford         | 2005        | 1.04<br>(0.94–1.14) |
| Bradford         | 2006        | 1.06<br>(0.97–1.17) |
| Bradford         | 2007        | 1.07<br>(0.97–1.18) |
| Bradford         | 2008        | 1.05<br>(0.96–1.16) |
| Bradford         | 2009        | 1.04<br>(0.95–1.14) |
| Bradford         | 2010        | 1.01<br>(0.92–1.09) |
| Bradford         | 2011        | 1.0<br>(0.91–1.09)  |
| Bradford         | 2012        | 0.96<br>(0.87–1.05) |
| Bradford         | 2013        | 0.94<br>(0.86–1.02) |
| Bradford         | 2014        | 0.94<br>(0.85–1.03) |
| Bradford         | 2015        | 0.97<br>(0.88–1.06) |
| Bradford         | 2016        | 0.92<br>(0.83–1.01) |
| Bradford         | 2017        | 0.96<br>(0.82–1.11) |
| Calderdale       | 1950        | 0.56<br>(0.47–0.67) |
| Calderdale       | 1951        | 0.66<br>(0.54–0.79) |
| Calderdale       | 1952        | 0.62<br>(0.51–0.74) |
| Calderdale       | 1953        | 0.62<br>(0.52–0.75) |
| Calderdale       | 1954        | 0.59<br>(0.49–0.7)  |
| Calderdale       | 1955        | 0.59<br>(0.5–0.7)   |
| Calderdale       | 1956        | 0.59<br>(0.5–0.69)  |
| Calderdale       | 1957        | 0.6<br>(0.51–0.71)  |
| Calderdale       | 1958        | 0.6<br>(0.51–0.7)   |
| Calderdale       | 1959        | 0.6<br>(0.51–0.71)  |
| Calderdale       | 1960        | 0.62<br>(0.52–0.73) |
| Calderdale       | 1961        | 0.64<br>(0.53–0.75) |
| Calderdale       | 1962        | 0.66<br>(0.54–0.79) |

**Table 15 Ratio of adjusted to unadjusted 5q0 values for scaled locations by year**

| <b>Geography</b> | <b>Year</b> | <b>Ratio</b>        |
|------------------|-------------|---------------------|
| Calderdale       | 1963        | 0.67<br>(0.55–0.8)  |
| Calderdale       | 1964        | 0.66<br>(0.54–0.79) |
| Calderdale       | 1965        | 0.65<br>(0.53–0.78) |
| Calderdale       | 1966        | 0.68<br>(0.55–0.81) |
| Calderdale       | 1967        | 0.67<br>(0.55–0.81) |
| Calderdale       | 1968        | 0.71<br>(0.58–0.85) |
| Calderdale       | 1969        | 0.73<br>(0.6–0.87)  |
| Calderdale       | 1970        | 0.77<br>(0.63–0.91) |
| Calderdale       | 1971        | 0.8<br>(0.67–0.95)  |
| Calderdale       | 1972        | 0.81<br>(0.69–0.94) |
| Calderdale       | 1973        | 0.82<br>(0.71–0.95) |
| Calderdale       | 1974        | 0.85<br>(0.73–0.97) |
| Calderdale       | 1975        | 0.86<br>(0.74–0.97) |
| Calderdale       | 1976        | 0.84<br>(0.73–0.94) |
| Calderdale       | 1977        | 0.87<br>(0.77–0.96) |
| Calderdale       | 1978        | 0.92<br>(0.84–1.02) |
| Calderdale       | 1979        | 0.96<br>(0.87–1.05) |
| Calderdale       | 1980        | 0.95<br>(0.86–1.05) |
| Calderdale       | 1981        | 0.91<br>(0.84–0.98) |
| Calderdale       | 1982        | 0.94<br>(0.87–1.02) |
| Calderdale       | 1983        | 0.96<br>(0.9–1.02)  |
| Calderdale       | 1984        | 0.93<br>(0.88–1.0)  |
| Calderdale       | 1985        | 0.98<br>(0.92–1.04) |
| Calderdale       | 1986        | 1.02<br>(0.96–1.08) |
| Calderdale       | 1987        | 1.02<br>(0.96–1.09) |
| Calderdale       | 1988        | 1.02<br>(0.95–1.09) |
| Calderdale       | 1989        | 1.0<br>(0.93–1.08)  |
| Calderdale       | 1990        | 1.02<br>(0.96–1.08) |
| Calderdale       | 1991        | 1.01<br>(0.94–1.07) |
| Calderdale       | 1992        | 0.91<br>(0.85–0.98) |
| Calderdale       | 1993        | 0.95<br>(0.87–1.04) |

**Table 15 Ratio of adjusted to unadjusted 5q0 values for scaled locations by year**

| <b>Geography</b> | <b>Year</b> | <b>Ratio</b>        |
|------------------|-------------|---------------------|
| Calderdale       | 1994        | 0.98<br>(0.9–1.05)  |
| Calderdale       | 1995        | 0.97<br>(0.89–1.06) |
| Calderdale       | 1996        | 1.0<br>(0.92–1.09)  |
| Calderdale       | 1997        | 0.97<br>(0.89–1.07) |
| Calderdale       | 1998        | 0.99<br>(0.91–1.08) |
| Calderdale       | 1999        | 1.01<br>(0.93–1.1)  |
| Calderdale       | 2000        | 1.04<br>(0.93–1.14) |
| Calderdale       | 2001        | 1.01<br>(0.94–1.08) |
| Calderdale       | 2002        | 1.0<br>(0.93–1.08)  |
| Calderdale       | 2003        | 1.05<br>(0.96–1.14) |
| Calderdale       | 2004        | 1.01<br>(0.93–1.1)  |
| Calderdale       | 2005        | 1.04<br>(0.94–1.14) |
| Calderdale       | 2006        | 1.06<br>(0.97–1.17) |
| Calderdale       | 2007        | 1.07<br>(0.97–1.18) |
| Calderdale       | 2008        | 1.05<br>(0.96–1.16) |
| Calderdale       | 2009        | 1.04<br>(0.95–1.14) |
| Calderdale       | 2010        | 1.01<br>(0.92–1.09) |
| Calderdale       | 2011        | 1.0<br>(0.91–1.09)  |
| Calderdale       | 2012        | 0.96<br>(0.87–1.05) |
| Calderdale       | 2013        | 0.94<br>(0.86–1.02) |
| Calderdale       | 2014        | 0.94<br>(0.85–1.03) |
| Calderdale       | 2015        | 0.97<br>(0.88–1.07) |
| Calderdale       | 2016        | 0.92<br>(0.83–1.01) |
| Calderdale       | 2017        | 0.96<br>(0.82–1.11) |
| Doncaster        | 1950        | 0.56<br>(0.46–0.67) |
| Doncaster        | 1951        | 0.66<br>(0.54–0.79) |
| Doncaster        | 1952        | 0.62<br>(0.51–0.74) |
| Doncaster        | 1953        | 0.62<br>(0.52–0.75) |
| Doncaster        | 1954        | 0.59<br>(0.49–0.7)  |
| Doncaster        | 1955        | 0.59<br>(0.5–0.7)   |
| Doncaster        | 1956        | 0.59<br>(0.49–0.69) |

**Table 15 Ratio of adjusted to unadjusted 5q0 values for scaled locations by year**

| <b>Geography</b> | <b>Year</b> | <b>Ratio</b>        |
|------------------|-------------|---------------------|
| Doncaster        | 1957        | 0.6<br>(0.51–0.71)  |
| Doncaster        | 1958        | 0.6<br>(0.5–0.7)    |
| Doncaster        | 1959        | 0.6<br>(0.51–0.71)  |
| Doncaster        | 1960        | 0.62<br>(0.52–0.73) |
| Doncaster        | 1961        | 0.63<br>(0.53–0.75) |
| Doncaster        | 1962        | 0.66<br>(0.54–0.79) |
| Doncaster        | 1963        | 0.67<br>(0.55–0.8)  |
| Doncaster        | 1964        | 0.66<br>(0.54–0.79) |
| Doncaster        | 1965        | 0.65<br>(0.53–0.78) |
| Doncaster        | 1966        | 0.68<br>(0.55–0.81) |
| Doncaster        | 1967        | 0.67<br>(0.55–0.81) |
| Doncaster        | 1968        | 0.71<br>(0.58–0.85) |
| Doncaster        | 1969        | 0.73<br>(0.6–0.87)  |
| Doncaster        | 1970        | 0.77<br>(0.63–0.91) |
| Doncaster        | 1971        | 0.8<br>(0.67–0.95)  |
| Doncaster        | 1972        | 0.81<br>(0.69–0.94) |
| Doncaster        | 1973        | 0.82<br>(0.71–0.95) |
| Doncaster        | 1974        | 0.84<br>(0.73–0.97) |
| Doncaster        | 1975        | 0.86<br>(0.74–0.97) |
| Doncaster        | 1976        | 0.84<br>(0.73–0.94) |
| Doncaster        | 1977        | 0.87<br>(0.77–0.96) |
| Doncaster        | 1978        | 0.92<br>(0.84–1.02) |
| Doncaster        | 1979        | 0.96<br>(0.87–1.05) |
| Doncaster        | 1980        | 0.95<br>(0.86–1.05) |
| Doncaster        | 1981        | 0.91<br>(0.84–0.98) |
| Doncaster        | 1982        | 0.94<br>(0.87–1.02) |
| Doncaster        | 1983        | 0.96<br>(0.9–1.02)  |
| Doncaster        | 1984        | 0.93<br>(0.88–1.0)  |
| Doncaster        | 1985        | 0.98<br>(0.92–1.04) |
| Doncaster        | 1986        | 1.02<br>(0.96–1.08) |
| Doncaster        | 1987        | 1.02<br>(0.96–1.09) |

**Table 15 Ratio of adjusted to unadjusted 5q0 values for scaled locations by year**

| <b>Geography</b>         | <b>Year</b> | <b>Ratio</b>        |
|--------------------------|-------------|---------------------|
| Doncaster                | 1988        | 1.02<br>(0.95–1.09) |
| Doncaster                | 1989        | 1.0<br>(0.93–1.08)  |
| Doncaster                | 1990        | 1.02<br>(0.96–1.08) |
| Doncaster                | 1991        | 1.01<br>(0.94–1.07) |
| Doncaster                | 1992        | 0.91<br>(0.85–0.98) |
| Doncaster                | 1993        | 0.95<br>(0.87–1.04) |
| Doncaster                | 1994        | 0.98<br>(0.9–1.05)  |
| Doncaster                | 1995        | 0.97<br>(0.89–1.06) |
| Doncaster                | 1996        | 1.0<br>(0.92–1.09)  |
| Doncaster                | 1997        | 0.97<br>(0.89–1.07) |
| Doncaster                | 1998        | 0.99<br>(0.91–1.08) |
| Doncaster                | 1999        | 1.01<br>(0.93–1.1)  |
| Doncaster                | 2000        | 1.04<br>(0.93–1.14) |
| Doncaster                | 2001        | 1.01<br>(0.94–1.08) |
| Doncaster                | 2002        | 1.0<br>(0.93–1.08)  |
| Doncaster                | 2003        | 1.05<br>(0.96–1.14) |
| Doncaster                | 2004        | 1.01<br>(0.93–1.1)  |
| Doncaster                | 2005        | 1.04<br>(0.94–1.14) |
| Doncaster                | 2006        | 1.06<br>(0.97–1.17) |
| Doncaster                | 2007        | 1.07<br>(0.97–1.18) |
| Doncaster                | 2008        | 1.05<br>(0.96–1.16) |
| Doncaster                | 2009        | 1.04<br>(0.95–1.14) |
| Doncaster                | 2010        | 1.01<br>(0.92–1.09) |
| Doncaster                | 2011        | 1.0<br>(0.91–1.09)  |
| Doncaster                | 2012        | 0.96<br>(0.87–1.05) |
| Doncaster                | 2013        | 0.94<br>(0.86–1.02) |
| Doncaster                | 2014        | 0.94<br>(0.85–1.03) |
| Doncaster                | 2015        | 0.97<br>(0.88–1.07) |
| Doncaster                | 2016        | 0.92<br>(0.83–1.01) |
| Doncaster                | 2017        | 0.96<br>(0.82–1.11) |
| East Riding of Yorkshire | 1950        | 0.56<br>(0.46–0.67) |

**Table 15 Ratio of adjusted to unadjusted 5q0 values for scaled locations by year**

| <b>Geography</b>         | <b>Year</b> | <b>Ratio</b>        |
|--------------------------|-------------|---------------------|
| East Riding of Yorkshire | 1951        | 0.66<br>(0.53–0.79) |
| East Riding of Yorkshire | 1952        | 0.62<br>(0.51–0.74) |
| East Riding of Yorkshire | 1953        | 0.62<br>(0.51–0.75) |
| East Riding of Yorkshire | 1954        | 0.59<br>(0.49–0.7)  |
| East Riding of Yorkshire | 1955        | 0.59<br>(0.5–0.7)   |
| East Riding of Yorkshire | 1956        | 0.59<br>(0.49–0.69) |
| East Riding of Yorkshire | 1957        | 0.6<br>(0.51–0.71)  |
| East Riding of Yorkshire | 1958        | 0.59<br>(0.5–0.7)   |
| East Riding of Yorkshire | 1959        | 0.6<br>(0.51–0.7)   |
| East Riding of Yorkshire | 1960        | 0.62<br>(0.52–0.73) |
| East Riding of Yorkshire | 1961        | 0.63<br>(0.53–0.75) |
| East Riding of Yorkshire | 1962        | 0.66<br>(0.54–0.79) |
| East Riding of Yorkshire | 1963        | 0.67<br>(0.55–0.8)  |
| East Riding of Yorkshire | 1964        | 0.66<br>(0.54–0.79) |
| East Riding of Yorkshire | 1965        | 0.65<br>(0.53–0.78) |
| East Riding of Yorkshire | 1966        | 0.68<br>(0.55–0.81) |
| East Riding of Yorkshire | 1967        | 0.67<br>(0.55–0.81) |
| East Riding of Yorkshire | 1968        | 0.71<br>(0.58–0.85) |
| East Riding of Yorkshire | 1969        | 0.73<br>(0.59–0.87) |
| East Riding of Yorkshire | 1970        | 0.77<br>(0.63–0.91) |
| East Riding of Yorkshire | 1971        | 0.8<br>(0.67–0.95)  |
| East Riding of Yorkshire | 1972        | 0.81<br>(0.69–0.94) |
| East Riding of Yorkshire | 1973        | 0.82<br>(0.71–0.95) |
| East Riding of Yorkshire | 1974        | 0.84<br>(0.73–0.97) |
| East Riding of Yorkshire | 1975        | 0.86<br>(0.74–0.97) |
| East Riding of Yorkshire | 1976        | 0.84<br>(0.73–0.94) |
| East Riding of Yorkshire | 1977        | 0.87<br>(0.77–0.96) |
| East Riding of Yorkshire | 1978        | 0.92<br>(0.84–1.02) |
| East Riding of Yorkshire | 1979        | 0.96<br>(0.87–1.05) |
| East Riding of Yorkshire | 1980        | 0.95<br>(0.86–1.05) |
| East Riding of Yorkshire | 1981        | 0.91<br>(0.84–0.98) |

**Table 15 Ratio of adjusted to unadjusted 5q0 values for scaled locations by year**

| <b>Geography</b>         | <b>Year</b> | <b>Ratio</b>        |
|--------------------------|-------------|---------------------|
| East Riding of Yorkshire | 1982        | 0.94<br>(0.87–1.02) |
| East Riding of Yorkshire | 1983        | 0.96<br>(0.9–1.02)  |
| East Riding of Yorkshire | 1984        | 0.93<br>(0.88–1.0)  |
| East Riding of Yorkshire | 1985        | 0.98<br>(0.92–1.04) |
| East Riding of Yorkshire | 1986        | 1.02<br>(0.96–1.08) |
| East Riding of Yorkshire | 1987        | 1.02<br>(0.96–1.09) |
| East Riding of Yorkshire | 1988        | 1.02<br>(0.95–1.09) |
| East Riding of Yorkshire | 1989        | 1.0<br>(0.93–1.08)  |
| East Riding of Yorkshire | 1990        | 1.02<br>(0.96–1.08) |
| East Riding of Yorkshire | 1991        | 1.01<br>(0.94–1.07) |
| East Riding of Yorkshire | 1992        | 0.91<br>(0.85–0.98) |
| East Riding of Yorkshire | 1993        | 0.95<br>(0.87–1.04) |
| East Riding of Yorkshire | 1994        | 0.98<br>(0.9–1.05)  |
| East Riding of Yorkshire | 1995        | 0.97<br>(0.89–1.06) |
| East Riding of Yorkshire | 1996        | 1.0<br>(0.92–1.09)  |
| East Riding of Yorkshire | 1997        | 0.97<br>(0.89–1.07) |
| East Riding of Yorkshire | 1998        | 0.99<br>(0.91–1.08) |
| East Riding of Yorkshire | 1999        | 1.01<br>(0.93–1.1)  |
| East Riding of Yorkshire | 2000        | 1.04<br>(0.93–1.14) |
| East Riding of Yorkshire | 2001        | 1.01<br>(0.94–1.08) |
| East Riding of Yorkshire | 2002        | 1.0<br>(0.93–1.08)  |
| East Riding of Yorkshire | 2003        | 1.05<br>(0.96–1.14) |
| East Riding of Yorkshire | 2004        | 1.01<br>(0.93–1.1)  |
| East Riding of Yorkshire | 2005        | 1.04<br>(0.94–1.14) |
| East Riding of Yorkshire | 2006        | 1.06<br>(0.97–1.17) |
| East Riding of Yorkshire | 2007        | 1.07<br>(0.97–1.18) |
| East Riding of Yorkshire | 2008        | 1.05<br>(0.96–1.16) |
| East Riding of Yorkshire | 2009        | 1.04<br>(0.95–1.14) |
| East Riding of Yorkshire | 2010        | 1.01<br>(0.92–1.09) |
| East Riding of Yorkshire | 2011        | 1.0<br>(0.91–1.09)  |
| East Riding of Yorkshire | 2012        | 0.96<br>(0.87–1.05) |

**Table 15 Ratio of adjusted to unadjusted 5q0 values for scaled locations by year**

| <b>Geography</b>            | <b>Year</b> | <b>Ratio</b>        |
|-----------------------------|-------------|---------------------|
| East Riding of Yorkshire    | 2013        | 0.94<br>(0.86–1.02) |
| East Riding of Yorkshire    | 2014        | 0.94<br>(0.85–1.03) |
| East Riding of Yorkshire    | 2015        | 0.97<br>(0.88–1.07) |
| East Riding of Yorkshire    | 2016        | 0.92<br>(0.83–1.01) |
| East Riding of Yorkshire    | 2017        | 0.96<br>(0.82–1.11) |
| Kingston upon Hull, City of | 1950        | 0.56<br>(0.47–0.67) |
| Kingston upon Hull, City of | 1951        | 0.66<br>(0.54–0.79) |
| Kingston upon Hull, City of | 1952        | 0.62<br>(0.51–0.74) |
| Kingston upon Hull, City of | 1953        | 0.62<br>(0.52–0.75) |
| Kingston upon Hull, City of | 1954        | 0.59<br>(0.49–0.7)  |
| Kingston upon Hull, City of | 1955        | 0.59<br>(0.5–0.7)   |
| Kingston upon Hull, City of | 1956        | 0.59<br>(0.5–0.69)  |
| Kingston upon Hull, City of | 1957        | 0.6<br>(0.51–0.71)  |
| Kingston upon Hull, City of | 1958        | 0.6<br>(0.51–0.7)   |
| Kingston upon Hull, City of | 1959        | 0.6<br>(0.51–0.71)  |
| Kingston upon Hull, City of | 1960        | 0.62<br>(0.52–0.73) |
| Kingston upon Hull, City of | 1961        | 0.64<br>(0.53–0.75) |
| Kingston upon Hull, City of | 1962        | 0.66<br>(0.55–0.79) |
| Kingston upon Hull, City of | 1963        | 0.67<br>(0.55–0.8)  |
| Kingston upon Hull, City of | 1964        | 0.66<br>(0.54–0.79) |
| Kingston upon Hull, City of | 1965        | 0.65<br>(0.53–0.78) |
| Kingston upon Hull, City of | 1966        | 0.68<br>(0.55–0.81) |
| Kingston upon Hull, City of | 1967        | 0.67<br>(0.55–0.81) |
| Kingston upon Hull, City of | 1968        | 0.71<br>(0.58–0.85) |
| Kingston upon Hull, City of | 1969        | 0.73<br>(0.6–0.87)  |
| Kingston upon Hull, City of | 1970        | 0.77<br>(0.63–0.91) |
| Kingston upon Hull, City of | 1971        | 0.8<br>(0.67–0.95)  |
| Kingston upon Hull, City of | 1972        | 0.81<br>(0.69–0.94) |
| Kingston upon Hull, City of | 1973        | 0.82<br>(0.71–0.95) |
| Kingston upon Hull, City of | 1974        | 0.85<br>(0.73–0.97) |
| Kingston upon Hull, City of | 1975        | 0.86<br>(0.74–0.97) |



**Table 15 Ratio of adjusted to unadjusted 5q0 values for scaled locations by year**

| <b>Geography</b>            | <b>Year</b> | <b>Ratio</b>        |
|-----------------------------|-------------|---------------------|
| Kingston upon Hull, City of | 1976        | 0.84<br>(0.73–0.94) |
| Kingston upon Hull, City of | 1977        | 0.87<br>(0.77–0.96) |
| Kingston upon Hull, City of | 1978        | 0.92<br>(0.84–1.02) |
| Kingston upon Hull, City of | 1979        | 0.96<br>(0.87–1.05) |
| Kingston upon Hull, City of | 1980        | 0.95<br>(0.86–1.05) |
| Kingston upon Hull, City of | 1981        | 0.91<br>(0.84–0.98) |
| Kingston upon Hull, City of | 1982        | 0.94<br>(0.87–1.02) |
| Kingston upon Hull, City of | 1983        | 0.96<br>(0.9–1.02)  |
| Kingston upon Hull, City of | 1984        | 0.93<br>(0.88–1.0)  |
| Kingston upon Hull, City of | 1985        | 0.98<br>(0.92–1.04) |
| Kingston upon Hull, City of | 1986        | 1.02<br>(0.96–1.08) |
| Kingston upon Hull, City of | 1987        | 1.02<br>(0.96–1.09) |
| Kingston upon Hull, City of | 1988        | 1.02<br>(0.95–1.09) |
| Kingston upon Hull, City of | 1989        | 1.0<br>(0.93–1.08)  |
| Kingston upon Hull, City of | 1990        | 1.02<br>(0.96–1.08) |
| Kingston upon Hull, City of | 1991        | 1.01<br>(0.94–1.07) |
| Kingston upon Hull, City of | 1992        | 0.91<br>(0.85–0.98) |
| Kingston upon Hull, City of | 1993        | 0.95<br>(0.87–1.04) |
| Kingston upon Hull, City of | 1994        | 0.98<br>(0.9–1.05)  |
| Kingston upon Hull, City of | 1995        | 0.97<br>(0.89–1.06) |
| Kingston upon Hull, City of | 1996        | 1.0<br>(0.92–1.09)  |
| Kingston upon Hull, City of | 1997        | 0.97<br>(0.89–1.07) |
| Kingston upon Hull, City of | 1998        | 0.99<br>(0.91–1.08) |
| Kingston upon Hull, City of | 1999        | 1.01<br>(0.93–1.1)  |
| Kingston upon Hull, City of | 2000        | 1.04<br>(0.93–1.14) |
| Kingston upon Hull, City of | 2001        | 1.01<br>(0.94–1.08) |
| Kingston upon Hull, City of | 2002        | 1.0<br>(0.93–1.08)  |
| Kingston upon Hull, City of | 2003        | 1.05<br>(0.96–1.14) |
| Kingston upon Hull, City of | 2004        | 1.01<br>(0.93–1.1)  |
| Kingston upon Hull, City of | 2005        | 1.04<br>(0.94–1.14) |
| Kingston upon Hull, City of | 2006        | 1.06<br>(0.97–1.17) |

**Table 15 Ratio of adjusted to unadjusted 5q0 values for scaled locations by year**

| <b>Geography</b>            | <b>Year</b> | <b>Ratio</b>        |
|-----------------------------|-------------|---------------------|
| Kingston upon Hull, City of | 2007        | 1.07<br>(0.97–1.18) |
| Kingston upon Hull, City of | 2008        | 1.05<br>(0.96–1.16) |
| Kingston upon Hull, City of | 2009        | 1.04<br>(0.95–1.14) |
| Kingston upon Hull, City of | 2010        | 1.01<br>(0.92–1.09) |
| Kingston upon Hull, City of | 2011        | 1.0<br>(0.91–1.09)  |
| Kingston upon Hull, City of | 2012        | 0.96<br>(0.87–1.05) |
| Kingston upon Hull, City of | 2013        | 0.94<br>(0.86–1.02) |
| Kingston upon Hull, City of | 2014        | 0.94<br>(0.85–1.03) |
| Kingston upon Hull, City of | 2015        | 0.97<br>(0.88–1.07) |
| Kingston upon Hull, City of | 2016        | 0.92<br>(0.83–1.01) |
| Kingston upon Hull, City of | 2017        | 0.96<br>(0.82–1.11) |
| Kirklees                    | 1950        | 0.56<br>(0.47–0.67) |
| Kirklees                    | 1951        | 0.66<br>(0.54–0.79) |
| Kirklees                    | 1952        | 0.62<br>(0.51–0.74) |
| Kirklees                    | 1953        | 0.62<br>(0.52–0.75) |
| Kirklees                    | 1954        | 0.59<br>(0.49–0.7)  |
| Kirklees                    | 1955        | 0.59<br>(0.5–0.7)   |
| Kirklees                    | 1956        | 0.59<br>(0.5–0.69)  |
| Kirklees                    | 1957        | 0.6<br>(0.51–0.71)  |
| Kirklees                    | 1958        | 0.6<br>(0.51–0.7)   |
| Kirklees                    | 1959        | 0.6<br>(0.51–0.71)  |
| Kirklees                    | 1960        | 0.62<br>(0.52–0.73) |
| Kirklees                    | 1961        | 0.64<br>(0.53–0.75) |
| Kirklees                    | 1962        | 0.66<br>(0.55–0.79) |
| Kirklees                    | 1963        | 0.67<br>(0.55–0.8)  |
| Kirklees                    | 1964        | 0.66<br>(0.54–0.79) |
| Kirklees                    | 1965        | 0.65<br>(0.53–0.78) |
| Kirklees                    | 1966        | 0.68<br>(0.55–0.81) |
| Kirklees                    | 1967        | 0.67<br>(0.55–0.81) |
| Kirklees                    | 1968        | 0.71<br>(0.58–0.85) |
| Kirklees                    | 1969        | 0.73<br>(0.6–0.87)  |

**Table 15 Ratio of adjusted to unadjusted 5q0 values for scaled locations by year**

| <b>Geography</b> | <b>Year</b> | <b>Ratio</b>        |
|------------------|-------------|---------------------|
| Kirklees         | 1970        | 0.77<br>(0.63–0.91) |
| Kirklees         | 1971        | 0.8<br>(0.67–0.95)  |
| Kirklees         | 1972        | 0.81<br>(0.69–0.94) |
| Kirklees         | 1973        | 0.82<br>(0.71–0.95) |
| Kirklees         | 1974        | 0.85<br>(0.73–0.97) |
| Kirklees         | 1975        | 0.86<br>(0.74–0.97) |
| Kirklees         | 1976        | 0.84<br>(0.73–0.94) |
| Kirklees         | 1977        | 0.87<br>(0.77–0.96) |
| Kirklees         | 1978        | 0.92<br>(0.84–1.02) |
| Kirklees         | 1979        | 0.96<br>(0.87–1.05) |
| Kirklees         | 1980        | 0.95<br>(0.86–1.05) |
| Kirklees         | 1981        | 0.91<br>(0.84–0.98) |
| Kirklees         | 1982        | 0.94<br>(0.87–1.02) |
| Kirklees         | 1983        | 0.96<br>(0.9–1.02)  |
| Kirklees         | 1984        | 0.93<br>(0.88–1.0)  |
| Kirklees         | 1985        | 0.98<br>(0.92–1.04) |
| Kirklees         | 1986        | 1.02<br>(0.96–1.08) |
| Kirklees         | 1987        | 1.02<br>(0.96–1.09) |
| Kirklees         | 1988        | 1.02<br>(0.95–1.09) |
| Kirklees         | 1989        | 1.0<br>(0.93–1.08)  |
| Kirklees         | 1990        | 1.02<br>(0.96–1.08) |
| Kirklees         | 1991        | 1.01<br>(0.94–1.07) |
| Kirklees         | 1992        | 0.91<br>(0.85–0.98) |
| Kirklees         | 1993        | 0.95<br>(0.87–1.04) |
| Kirklees         | 1994        | 0.98<br>(0.9–1.05)  |
| Kirklees         | 1995        | 0.97<br>(0.89–1.06) |
| Kirklees         | 1996        | 1.0<br>(0.92–1.09)  |
| Kirklees         | 1997        | 0.97<br>(0.89–1.07) |
| Kirklees         | 1998        | 0.99<br>(0.91–1.08) |
| Kirklees         | 1999        | 1.01<br>(0.93–1.1)  |
| Kirklees         | 2000        | 1.04<br>(0.93–1.14) |

**Table 15 Ratio of adjusted to unadjusted 5q0 values for scaled locations by year**

| <b>Geography</b> | <b>Year</b> | <b>Ratio</b>        |
|------------------|-------------|---------------------|
| Kirklees         | 2001        | 1.01<br>(0.94–1.08) |
| Kirklees         | 2002        | 1.0<br>(0.93–1.08)  |
| Kirklees         | 2003        | 1.05<br>(0.96–1.14) |
| Kirklees         | 2004        | 1.01<br>(0.93–1.1)  |
| Kirklees         | 2005        | 1.04<br>(0.94–1.14) |
| Kirklees         | 2006        | 1.06<br>(0.97–1.17) |
| Kirklees         | 2007        | 1.07<br>(0.97–1.18) |
| Kirklees         | 2008        | 1.05<br>(0.96–1.16) |
| Kirklees         | 2009        | 1.04<br>(0.95–1.14) |
| Kirklees         | 2010        | 1.01<br>(0.92–1.09) |
| Kirklees         | 2011        | 1.0<br>(0.91–1.09)  |
| Kirklees         | 2012        | 0.96<br>(0.87–1.05) |
| Kirklees         | 2013        | 0.94<br>(0.86–1.02) |
| Kirklees         | 2014        | 0.94<br>(0.85–1.03) |
| Kirklees         | 2015        | 0.97<br>(0.88–1.06) |
| Kirklees         | 2016        | 0.92<br>(0.83–1.01) |
| Kirklees         | 2017        | 0.96<br>(0.82–1.11) |
| Leeds            | 1950        | 0.56<br>(0.46–0.67) |
| Leeds            | 1951        | 0.66<br>(0.54–0.79) |
| Leeds            | 1952        | 0.62<br>(0.51–0.74) |
| Leeds            | 1953        | 0.62<br>(0.52–0.75) |
| Leeds            | 1954        | 0.59<br>(0.49–0.7)  |
| Leeds            | 1955        | 0.59<br>(0.5–0.7)   |
| Leeds            | 1956        | 0.59<br>(0.5–0.69)  |
| Leeds            | 1957        | 0.6<br>(0.51–0.71)  |
| Leeds            | 1958        | 0.6<br>(0.5–0.7)    |
| Leeds            | 1959        | 0.6<br>(0.51–0.71)  |
| Leeds            | 1960        | 0.62<br>(0.52–0.73) |
| Leeds            | 1961        | 0.63<br>(0.53–0.75) |
| Leeds            | 1962        | 0.66<br>(0.54–0.79) |
| Leeds            | 1963        | 0.67<br>(0.55–0.8)  |

**Table 15 Ratio of adjusted to unadjusted 5q0 values for scaled locations by year**

| <b>Geography</b> | <b>Year</b> | <b>Ratio</b>        |
|------------------|-------------|---------------------|
| Leeds            | 1964        | 0.66<br>(0.54–0.79) |
| Leeds            | 1965        | 0.65<br>(0.53–0.78) |
| Leeds            | 1966        | 0.68<br>(0.55–0.81) |
| Leeds            | 1967        | 0.67<br>(0.55–0.81) |
| Leeds            | 1968        | 0.71<br>(0.58–0.85) |
| Leeds            | 1969        | 0.73<br>(0.6–0.87)  |
| Leeds            | 1970        | 0.77<br>(0.63–0.91) |
| Leeds            | 1971        | 0.8<br>(0.67–0.95)  |
| Leeds            | 1972        | 0.81<br>(0.69–0.94) |
| Leeds            | 1973        | 0.82<br>(0.71–0.95) |
| Leeds            | 1974        | 0.85<br>(0.73–0.97) |
| Leeds            | 1975        | 0.86<br>(0.74–0.97) |
| Leeds            | 1976        | 0.84<br>(0.73–0.94) |
| Leeds            | 1977        | 0.87<br>(0.77–0.96) |
| Leeds            | 1978        | 0.92<br>(0.84–1.02) |
| Leeds            | 1979        | 0.96<br>(0.87–1.05) |
| Leeds            | 1980        | 0.95<br>(0.86–1.05) |
| Leeds            | 1981        | 0.91<br>(0.84–0.98) |
| Leeds            | 1982        | 0.94<br>(0.87–1.02) |
| Leeds            | 1983        | 0.96<br>(0.9–1.02)  |
| Leeds            | 1984        | 0.93<br>(0.88–1.0)  |
| Leeds            | 1985        | 0.98<br>(0.92–1.04) |
| Leeds            | 1986        | 1.02<br>(0.96–1.08) |
| Leeds            | 1987        | 1.02<br>(0.96–1.09) |
| Leeds            | 1988        | 1.02<br>(0.95–1.09) |
| Leeds            | 1989        | 1.0<br>(0.93–1.08)  |
| Leeds            | 1990        | 1.02<br>(0.96–1.08) |
| Leeds            | 1991        | 1.01<br>(0.94–1.07) |
| Leeds            | 1992        | 0.91<br>(0.85–0.98) |
| Leeds            | 1993        | 0.95<br>(0.87–1.04) |
| Leeds            | 1994        | 0.98<br>(0.9–1.05)  |

**Table 15 Ratio of adjusted to unadjusted 5q0 values for scaled locations by year**

| <b>Geography</b>        | <b>Year</b> | <b>Ratio</b>        |
|-------------------------|-------------|---------------------|
| Leeds                   | 1995        | 0.97<br>(0.89–1.06) |
| Leeds                   | 1996        | 1.0<br>(0.92–1.09)  |
| Leeds                   | 1997        | 0.97<br>(0.89–1.07) |
| Leeds                   | 1998        | 0.99<br>(0.91–1.08) |
| Leeds                   | 1999        | 1.01<br>(0.93–1.1)  |
| Leeds                   | 2000        | 1.04<br>(0.93–1.14) |
| Leeds                   | 2001        | 1.01<br>(0.94–1.08) |
| Leeds                   | 2002        | 1.0<br>(0.93–1.08)  |
| Leeds                   | 2003        | 1.05<br>(0.96–1.14) |
| Leeds                   | 2004        | 1.01<br>(0.93–1.1)  |
| Leeds                   | 2005        | 1.04<br>(0.94–1.14) |
| Leeds                   | 2006        | 1.06<br>(0.97–1.17) |
| Leeds                   | 2007        | 1.07<br>(0.97–1.18) |
| Leeds                   | 2008        | 1.05<br>(0.96–1.16) |
| Leeds                   | 2009        | 1.04<br>(0.95–1.14) |
| Leeds                   | 2010        | 1.01<br>(0.92–1.09) |
| Leeds                   | 2011        | 1.0<br>(0.91–1.09)  |
| Leeds                   | 2012        | 0.96<br>(0.87–1.05) |
| Leeds                   | 2013        | 0.94<br>(0.86–1.02) |
| Leeds                   | 2014        | 0.94<br>(0.85–1.03) |
| Leeds                   | 2015        | 0.97<br>(0.88–1.07) |
| Leeds                   | 2016        | 0.92<br>(0.83–1.01) |
| Leeds                   | 2017        | 0.96<br>(0.82–1.11) |
| North East Lincolnshire | 1950        | 0.56<br>(0.46–0.67) |
| North East Lincolnshire | 1951        | 0.66<br>(0.54–0.79) |
| North East Lincolnshire | 1952        | 0.62<br>(0.51–0.74) |
| North East Lincolnshire | 1953        | 0.62<br>(0.52–0.75) |
| North East Lincolnshire | 1954        | 0.59<br>(0.49–0.7)  |
| North East Lincolnshire | 1955        | 0.59<br>(0.5–0.7)   |
| North East Lincolnshire | 1956        | 0.59<br>(0.49–0.69) |
| North East Lincolnshire | 1957        | 0.6<br>(0.51–0.71)  |

**Table 15 Ratio of adjusted to unadjusted 5q0 values for scaled locations by year**

| <b>Geography</b>        | <b>Year</b> | <b>Ratio</b>        |
|-------------------------|-------------|---------------------|
| North East Lincolnshire | 1958        | 0.6<br>(0.5–0.7)    |
| North East Lincolnshire | 1959        | 0.6<br>(0.51–0.71)  |
| North East Lincolnshire | 1960        | 0.62<br>(0.52–0.73) |
| North East Lincolnshire | 1961        | 0.63<br>(0.53–0.75) |
| North East Lincolnshire | 1962        | 0.66<br>(0.54–0.79) |
| North East Lincolnshire | 1963        | 0.67<br>(0.55–0.8)  |
| North East Lincolnshire | 1964        | 0.66<br>(0.54–0.79) |
| North East Lincolnshire | 1965        | 0.65<br>(0.53–0.78) |
| North East Lincolnshire | 1966        | 0.68<br>(0.55–0.81) |
| North East Lincolnshire | 1967        | 0.67<br>(0.55–0.81) |
| North East Lincolnshire | 1968        | 0.71<br>(0.58–0.85) |
| North East Lincolnshire | 1969        | 0.73<br>(0.6–0.87)  |
| North East Lincolnshire | 1970        | 0.77<br>(0.63–0.91) |
| North East Lincolnshire | 1971        | 0.8<br>(0.67–0.95)  |
| North East Lincolnshire | 1972        | 0.81<br>(0.69–0.94) |
| North East Lincolnshire | 1973        | 0.82<br>(0.71–0.95) |
| North East Lincolnshire | 1974        | 0.84<br>(0.73–0.97) |
| North East Lincolnshire | 1975        | 0.86<br>(0.74–0.97) |
| North East Lincolnshire | 1976        | 0.84<br>(0.73–0.94) |
| North East Lincolnshire | 1977        | 0.87<br>(0.77–0.96) |
| North East Lincolnshire | 1978        | 0.92<br>(0.84–1.02) |
| North East Lincolnshire | 1979        | 0.96<br>(0.87–1.05) |
| North East Lincolnshire | 1980        | 0.95<br>(0.86–1.05) |
| North East Lincolnshire | 1981        | 0.91<br>(0.84–0.98) |
| North East Lincolnshire | 1982        | 0.94<br>(0.87–1.02) |
| North East Lincolnshire | 1983        | 0.96<br>(0.9–1.02)  |
| North East Lincolnshire | 1984        | 0.93<br>(0.88–1.0)  |
| North East Lincolnshire | 1985        | 0.98<br>(0.92–1.04) |
| North East Lincolnshire | 1986        | 1.02<br>(0.96–1.08) |
| North East Lincolnshire | 1987        | 1.02<br>(0.96–1.09) |
| North East Lincolnshire | 1988        | 1.02<br>(0.95–1.09) |

**Table 15 Ratio of adjusted to unadjusted 5q0 values for scaled locations by year**

| <b>Geography</b>        | <b>Year</b> | <b>Ratio</b>        |
|-------------------------|-------------|---------------------|
| North East Lincolnshire | 1989        | 1.0<br>(0.93–1.08)  |
| North East Lincolnshire | 1990        | 1.02<br>(0.96–1.08) |
| North East Lincolnshire | 1991        | 1.01<br>(0.94–1.07) |
| North East Lincolnshire | 1992        | 0.91<br>(0.85–0.98) |
| North East Lincolnshire | 1993        | 0.95<br>(0.87–1.04) |
| North East Lincolnshire | 1994        | 0.98<br>(0.9–1.05)  |
| North East Lincolnshire | 1995        | 0.97<br>(0.89–1.06) |
| North East Lincolnshire | 1996        | 1.0<br>(0.92–1.09)  |
| North East Lincolnshire | 1997        | 0.97<br>(0.89–1.07) |
| North East Lincolnshire | 1998        | 0.99<br>(0.91–1.08) |
| North East Lincolnshire | 1999        | 1.01<br>(0.93–1.1)  |
| North East Lincolnshire | 2000        | 1.04<br>(0.93–1.14) |
| North East Lincolnshire | 2001        | 1.01<br>(0.94–1.08) |
| North East Lincolnshire | 2002        | 1.0<br>(0.93–1.08)  |
| North East Lincolnshire | 2003        | 1.05<br>(0.96–1.14) |
| North East Lincolnshire | 2004        | 1.01<br>(0.93–1.1)  |
| North East Lincolnshire | 2005        | 1.04<br>(0.94–1.14) |
| North East Lincolnshire | 2006        | 1.06<br>(0.97–1.17) |
| North East Lincolnshire | 2007        | 1.07<br>(0.97–1.18) |
| North East Lincolnshire | 2008        | 1.05<br>(0.96–1.16) |
| North East Lincolnshire | 2009        | 1.04<br>(0.95–1.14) |
| North East Lincolnshire | 2010        | 1.01<br>(0.92–1.09) |
| North East Lincolnshire | 2011        | 1.0<br>(0.91–1.09)  |
| North East Lincolnshire | 2012        | 0.96<br>(0.87–1.05) |
| North East Lincolnshire | 2013        | 0.94<br>(0.86–1.02) |
| North East Lincolnshire | 2014        | 0.94<br>(0.85–1.03) |
| North East Lincolnshire | 2015        | 0.97<br>(0.88–1.07) |
| North East Lincolnshire | 2016        | 0.92<br>(0.83–1.01) |
| North East Lincolnshire | 2017        | 0.96<br>(0.82–1.11) |
| North Lincolnshire      | 1950        | 0.56<br>(0.46–0.67) |
| North Lincolnshire      | 1951        | 0.66<br>(0.54–0.79) |



**Table 15 Ratio of adjusted to unadjusted 5q0 values for scaled locations by year**

| <b>Geography</b>   | <b>Year</b> | <b>Ratio</b>        |
|--------------------|-------------|---------------------|
| North Lincolnshire | 1952        | 0.62<br>(0.51–0.74) |
| North Lincolnshire | 1953        | 0.62<br>(0.52–0.75) |
| North Lincolnshire | 1954        | 0.59<br>(0.49–0.7)  |
| North Lincolnshire | 1955        | 0.59<br>(0.5–0.7)   |
| North Lincolnshire | 1956        | 0.59<br>(0.49–0.69) |
| North Lincolnshire | 1957        | 0.6<br>(0.51–0.71)  |
| North Lincolnshire | 1958        | 0.6<br>(0.5–0.7)    |
| North Lincolnshire | 1959        | 0.6<br>(0.51–0.71)  |
| North Lincolnshire | 1960        | 0.62<br>(0.52–0.73) |
| North Lincolnshire | 1961        | 0.63<br>(0.53–0.75) |
| North Lincolnshire | 1962        | 0.66<br>(0.54–0.79) |
| North Lincolnshire | 1963        | 0.67<br>(0.55–0.8)  |
| North Lincolnshire | 1964        | 0.66<br>(0.54–0.79) |
| North Lincolnshire | 1965        | 0.65<br>(0.53–0.78) |
| North Lincolnshire | 1966        | 0.68<br>(0.55–0.81) |
| North Lincolnshire | 1967        | 0.67<br>(0.55–0.81) |
| North Lincolnshire | 1968        | 0.71<br>(0.58–0.85) |
| North Lincolnshire | 1969        | 0.73<br>(0.6–0.87)  |
| North Lincolnshire | 1970        | 0.77<br>(0.63–0.91) |
| North Lincolnshire | 1971        | 0.8<br>(0.67–0.95)  |
| North Lincolnshire | 1972        | 0.81<br>(0.69–0.94) |
| North Lincolnshire | 1973        | 0.82<br>(0.71–0.95) |
| North Lincolnshire | 1974        | 0.84<br>(0.73–0.97) |
| North Lincolnshire | 1975        | 0.86<br>(0.74–0.97) |
| North Lincolnshire | 1976        | 0.84<br>(0.73–0.94) |
| North Lincolnshire | 1977        | 0.87<br>(0.77–0.96) |
| North Lincolnshire | 1978        | 0.92<br>(0.84–1.02) |
| North Lincolnshire | 1979        | 0.96<br>(0.87–1.05) |
| North Lincolnshire | 1980        | 0.95<br>(0.86–1.05) |
| North Lincolnshire | 1981        | 0.91<br>(0.84–0.98) |
| North Lincolnshire | 1982        | 0.94<br>(0.87–1.02) |

**Table 15 Ratio of adjusted to unadjusted 5q0 values for scaled locations by year**

| <b>Geography</b>   | <b>Year</b> | <b>Ratio</b>        |
|--------------------|-------------|---------------------|
| North Lincolnshire | 1983        | 0.96<br>(0.9–1.02)  |
| North Lincolnshire | 1984        | 0.93<br>(0.88–1.0)  |
| North Lincolnshire | 1985        | 0.98<br>(0.92–1.04) |
| North Lincolnshire | 1986        | 1.02<br>(0.96–1.08) |
| North Lincolnshire | 1987        | 1.02<br>(0.96–1.09) |
| North Lincolnshire | 1988        | 1.02<br>(0.95–1.09) |
| North Lincolnshire | 1989        | 1.0<br>(0.93–1.08)  |
| North Lincolnshire | 1990        | 1.02<br>(0.96–1.08) |
| North Lincolnshire | 1991        | 1.01<br>(0.94–1.07) |
| North Lincolnshire | 1992        | 0.91<br>(0.85–0.98) |
| North Lincolnshire | 1993        | 0.95<br>(0.87–1.04) |
| North Lincolnshire | 1994        | 0.98<br>(0.9–1.05)  |
| North Lincolnshire | 1995        | 0.97<br>(0.89–1.06) |
| North Lincolnshire | 1996        | 1.0<br>(0.92–1.09)  |
| North Lincolnshire | 1997        | 0.97<br>(0.89–1.07) |
| North Lincolnshire | 1998        | 0.99<br>(0.91–1.08) |
| North Lincolnshire | 1999        | 1.01<br>(0.93–1.1)  |
| North Lincolnshire | 2000        | 1.04<br>(0.93–1.14) |
| North Lincolnshire | 2001        | 1.01<br>(0.94–1.08) |
| North Lincolnshire | 2002        | 1.0<br>(0.93–1.08)  |
| North Lincolnshire | 2003        | 1.05<br>(0.96–1.14) |
| North Lincolnshire | 2004        | 1.01<br>(0.93–1.1)  |
| North Lincolnshire | 2005        | 1.04<br>(0.94–1.14) |
| North Lincolnshire | 2006        | 1.06<br>(0.97–1.17) |
| North Lincolnshire | 2007        | 1.07<br>(0.97–1.18) |
| North Lincolnshire | 2008        | 1.05<br>(0.96–1.16) |
| North Lincolnshire | 2009        | 1.04<br>(0.95–1.14) |
| North Lincolnshire | 2010        | 1.01<br>(0.92–1.09) |
| North Lincolnshire | 2011        | 1.0<br>(0.91–1.09)  |
| North Lincolnshire | 2012        | 0.96<br>(0.87–1.05) |
| North Lincolnshire | 2013        | 0.94<br>(0.86–1.02) |

**Table 15 Ratio of adjusted to unadjusted 5q0 values for scaled locations by year**

| <b>Geography</b>   | <b>Year</b> | <b>Ratio</b>        |
|--------------------|-------------|---------------------|
| North Lincolnshire | 2014        | 0.94<br>(0.85–1.03) |
| North Lincolnshire | 2015        | 0.97<br>(0.88–1.07) |
| North Lincolnshire | 2016        | 0.92<br>(0.83–1.01) |
| North Lincolnshire | 2017        | 0.96<br>(0.82–1.11) |
| North Yorkshire    | 1950        | 0.56<br>(0.46–0.67) |
| North Yorkshire    | 1951        | 0.66<br>(0.54–0.79) |
| North Yorkshire    | 1952        | 0.62<br>(0.51–0.74) |
| North Yorkshire    | 1953        | 0.62<br>(0.52–0.75) |
| North Yorkshire    | 1954        | 0.59<br>(0.49–0.7)  |
| North Yorkshire    | 1955        | 0.59<br>(0.5–0.7)   |
| North Yorkshire    | 1956        | 0.59<br>(0.49–0.69) |
| North Yorkshire    | 1957        | 0.6<br>(0.51–0.71)  |
| North Yorkshire    | 1958        | 0.6<br>(0.5–0.7)    |
| North Yorkshire    | 1959        | 0.6<br>(0.51–0.71)  |
| North Yorkshire    | 1960        | 0.62<br>(0.52–0.73) |
| North Yorkshire    | 1961        | 0.63<br>(0.53–0.75) |
| North Yorkshire    | 1962        | 0.66<br>(0.54–0.79) |
| North Yorkshire    | 1963        | 0.67<br>(0.55–0.8)  |
| North Yorkshire    | 1964        | 0.66<br>(0.54–0.79) |
| North Yorkshire    | 1965        | 0.65<br>(0.53–0.78) |
| North Yorkshire    | 1966        | 0.68<br>(0.55–0.81) |
| North Yorkshire    | 1967        | 0.67<br>(0.55–0.81) |
| North Yorkshire    | 1968        | 0.71<br>(0.58–0.85) |
| North Yorkshire    | 1969        | 0.73<br>(0.6–0.87)  |
| North Yorkshire    | 1970        | 0.77<br>(0.63–0.91) |
| North Yorkshire    | 1971        | 0.8<br>(0.67–0.95)  |
| North Yorkshire    | 1972        | 0.81<br>(0.69–0.94) |
| North Yorkshire    | 1973        | 0.82<br>(0.71–0.95) |
| North Yorkshire    | 1974        | 0.84<br>(0.73–0.97) |
| North Yorkshire    | 1975        | 0.86<br>(0.74–0.97) |
| North Yorkshire    | 1976        | 0.84<br>(0.73–0.94) |

**Table 15 Ratio of adjusted to unadjusted 5q0 values for scaled locations by year**

| <b>Geography</b> | <b>Year</b> | <b>Ratio</b>        |
|------------------|-------------|---------------------|
| North Yorkshire  | 1977        | 0.87<br>(0.77–0.96) |
| North Yorkshire  | 1978        | 0.92<br>(0.84–1.02) |
| North Yorkshire  | 1979        | 0.96<br>(0.87–1.05) |
| North Yorkshire  | 1980        | 0.95<br>(0.86–1.05) |
| North Yorkshire  | 1981        | 0.91<br>(0.84–0.98) |
| North Yorkshire  | 1982        | 0.94<br>(0.87–1.02) |
| North Yorkshire  | 1983        | 0.96<br>(0.9–1.02)  |
| North Yorkshire  | 1984        | 0.93<br>(0.88–1.0)  |
| North Yorkshire  | 1985        | 0.98<br>(0.92–1.04) |
| North Yorkshire  | 1986        | 1.02<br>(0.96–1.08) |
| North Yorkshire  | 1987        | 1.02<br>(0.96–1.09) |
| North Yorkshire  | 1988        | 1.02<br>(0.95–1.09) |
| North Yorkshire  | 1989        | 1.0<br>(0.93–1.08)  |
| North Yorkshire  | 1990        | 1.02<br>(0.96–1.08) |
| North Yorkshire  | 1991        | 1.01<br>(0.94–1.07) |
| North Yorkshire  | 1992        | 0.91<br>(0.85–0.98) |
| North Yorkshire  | 1993        | 0.95<br>(0.87–1.04) |
| North Yorkshire  | 1994        | 0.98<br>(0.9–1.05)  |
| North Yorkshire  | 1995        | 0.97<br>(0.89–1.06) |
| North Yorkshire  | 1996        | 1.0<br>(0.92–1.09)  |
| North Yorkshire  | 1997        | 0.97<br>(0.89–1.07) |
| North Yorkshire  | 1998        | 0.99<br>(0.91–1.08) |
| North Yorkshire  | 1999        | 1.01<br>(0.93–1.1)  |
| North Yorkshire  | 2000        | 1.04<br>(0.93–1.14) |
| North Yorkshire  | 2001        | 1.01<br>(0.94–1.08) |
| North Yorkshire  | 2002        | 1.0<br>(0.93–1.08)  |
| North Yorkshire  | 2003        | 1.05<br>(0.96–1.14) |
| North Yorkshire  | 2004        | 1.02<br>(0.93–1.1)  |
| North Yorkshire  | 2005        | 1.04<br>(0.94–1.14) |
| North Yorkshire  | 2006        | 1.06<br>(0.97–1.17) |
| North Yorkshire  | 2007        | 1.07<br>(0.97–1.18) |

**Table 15 Ratio of adjusted to unadjusted 5q0 values for scaled locations by year**

| <b>Geography</b> | <b>Year</b> | <b>Ratio</b>        |
|------------------|-------------|---------------------|
| North Yorkshire  | 2008        | 1.05<br>(0.96–1.16) |
| North Yorkshire  | 2009        | 1.04<br>(0.95–1.14) |
| North Yorkshire  | 2010        | 1.01<br>(0.92–1.09) |
| North Yorkshire  | 2011        | 1.0<br>(0.91–1.09)  |
| North Yorkshire  | 2012        | 0.96<br>(0.87–1.05) |
| North Yorkshire  | 2013        | 0.94<br>(0.86–1.02) |
| North Yorkshire  | 2014        | 0.94<br>(0.85–1.03) |
| North Yorkshire  | 2015        | 0.97<br>(0.88–1.07) |
| North Yorkshire  | 2016        | 0.92<br>(0.83–1.01) |
| North Yorkshire  | 2017        | 0.96<br>(0.82–1.11) |
| Rotherham        | 1950        | 0.56<br>(0.46–0.67) |
| Rotherham        | 1951        | 0.66<br>(0.54–0.79) |
| Rotherham        | 1952        | 0.62<br>(0.51–0.74) |
| Rotherham        | 1953        | 0.62<br>(0.52–0.75) |
| Rotherham        | 1954        | 0.59<br>(0.49–0.7)  |
| Rotherham        | 1955        | 0.59<br>(0.5–0.7)   |
| Rotherham        | 1956        | 0.59<br>(0.5–0.69)  |
| Rotherham        | 1957        | 0.6<br>(0.51–0.71)  |
| Rotherham        | 1958        | 0.6<br>(0.51–0.7)   |
| Rotherham        | 1959        | 0.6<br>(0.51–0.71)  |
| Rotherham        | 1960        | 0.62<br>(0.52–0.73) |
| Rotherham        | 1961        | 0.63<br>(0.53–0.75) |
| Rotherham        | 1962        | 0.66<br>(0.54–0.79) |
| Rotherham        | 1963        | 0.67<br>(0.55–0.8)  |
| Rotherham        | 1964        | 0.66<br>(0.54–0.79) |
| Rotherham        | 1965        | 0.65<br>(0.53–0.78) |
| Rotherham        | 1966        | 0.68<br>(0.55–0.81) |
| Rotherham        | 1967        | 0.67<br>(0.55–0.81) |
| Rotherham        | 1968        | 0.71<br>(0.58–0.85) |
| Rotherham        | 1969        | 0.73<br>(0.6–0.87)  |
| Rotherham        | 1970        | 0.77<br>(0.63–0.91) |

**Table 15 Ratio of adjusted to unadjusted 5q0 values for scaled locations by year**

| <b>Geography</b> | <b>Year</b> | <b>Ratio</b>        |
|------------------|-------------|---------------------|
| Rotherham        | 1971        | 0.8<br>(0.67–0.95)  |
| Rotherham        | 1972        | 0.81<br>(0.69–0.94) |
| Rotherham        | 1973        | 0.82<br>(0.71–0.95) |
| Rotherham        | 1974        | 0.84<br>(0.73–0.97) |
| Rotherham        | 1975        | 0.86<br>(0.74–0.97) |
| Rotherham        | 1976        | 0.84<br>(0.73–0.94) |
| Rotherham        | 1977        | 0.87<br>(0.77–0.96) |
| Rotherham        | 1978        | 0.92<br>(0.84–1.02) |
| Rotherham        | 1979        | 0.96<br>(0.87–1.05) |
| Rotherham        | 1980        | 0.95<br>(0.86–1.05) |
| Rotherham        | 1981        | 0.91<br>(0.84–0.98) |
| Rotherham        | 1982        | 0.94<br>(0.87–1.02) |
| Rotherham        | 1983        | 0.96<br>(0.9–1.02)  |
| Rotherham        | 1984        | 0.93<br>(0.88–1.0)  |
| Rotherham        | 1985        | 0.98<br>(0.92–1.04) |
| Rotherham        | 1986        | 1.02<br>(0.96–1.08) |
| Rotherham        | 1987        | 1.02<br>(0.96–1.09) |
| Rotherham        | 1988        | 1.02<br>(0.95–1.09) |
| Rotherham        | 1989        | 1.0<br>(0.93–1.08)  |
| Rotherham        | 1990        | 1.02<br>(0.96–1.08) |
| Rotherham        | 1991        | 1.01<br>(0.94–1.07) |
| Rotherham        | 1992        | 0.91<br>(0.85–0.98) |
| Rotherham        | 1993        | 0.95<br>(0.87–1.04) |
| Rotherham        | 1994        | 0.98<br>(0.9–1.05)  |
| Rotherham        | 1995        | 0.97<br>(0.89–1.06) |
| Rotherham        | 1996        | 1.0<br>(0.92–1.09)  |
| Rotherham        | 1997        | 0.97<br>(0.89–1.07) |
| Rotherham        | 1998        | 0.99<br>(0.91–1.08) |
| Rotherham        | 1999        | 1.01<br>(0.93–1.1)  |
| Rotherham        | 2000        | 1.04<br>(0.93–1.14) |
| Rotherham        | 2001        | 1.01<br>(0.94–1.08) |

**Table 15 Ratio of adjusted to unadjusted 5q0 values for scaled locations by year**

| <b>Geography</b> | <b>Year</b> | <b>Ratio</b>        |
|------------------|-------------|---------------------|
| Rotherham        | 2002        | 1.0<br>(0.93–1.08)  |
| Rotherham        | 2003        | 1.05<br>(0.96–1.14) |
| Rotherham        | 2004        | 1.01<br>(0.93–1.1)  |
| Rotherham        | 2005        | 1.04<br>(0.94–1.14) |
| Rotherham        | 2006        | 1.06<br>(0.97–1.17) |
| Rotherham        | 2007        | 1.07<br>(0.97–1.18) |
| Rotherham        | 2008        | 1.05<br>(0.96–1.16) |
| Rotherham        | 2009        | 1.04<br>(0.95–1.14) |
| Rotherham        | 2010        | 1.01<br>(0.92–1.09) |
| Rotherham        | 2011        | 1.0<br>(0.91–1.09)  |
| Rotherham        | 2012        | 0.96<br>(0.87–1.05) |
| Rotherham        | 2013        | 0.94<br>(0.86–1.02) |
| Rotherham        | 2014        | 0.94<br>(0.85–1.03) |
| Rotherham        | 2015        | 0.97<br>(0.88–1.07) |
| Rotherham        | 2016        | 0.92<br>(0.83–1.01) |
| Rotherham        | 2017        | 0.96<br>(0.82–1.11) |
| Sheffield        | 1950        | 0.56<br>(0.46–0.67) |
| Sheffield        | 1951        | 0.66<br>(0.54–0.79) |
| Sheffield        | 1952        | 0.62<br>(0.51–0.74) |
| Sheffield        | 1953        | 0.62<br>(0.52–0.75) |
| Sheffield        | 1954        | 0.59<br>(0.49–0.7)  |
| Sheffield        | 1955        | 0.59<br>(0.5–0.7)   |
| Sheffield        | 1956        | 0.59<br>(0.49–0.69) |
| Sheffield        | 1957        | 0.6<br>(0.51–0.71)  |
| Sheffield        | 1958        | 0.6<br>(0.5–0.7)    |
| Sheffield        | 1959        | 0.6<br>(0.51–0.7)   |
| Sheffield        | 1960        | 0.62<br>(0.52–0.73) |
| Sheffield        | 1961        | 0.63<br>(0.53–0.75) |
| Sheffield        | 1962        | 0.66<br>(0.54–0.79) |
| Sheffield        | 1963        | 0.67<br>(0.55–0.8)  |
| Sheffield        | 1964        | 0.66<br>(0.54–0.79) |

**Table 15 Ratio of adjusted to unadjusted 5q0 values for scaled locations by year**

| <b>Geography</b> | <b>Year</b> | <b>Ratio</b>        |
|------------------|-------------|---------------------|
| Sheffield        | 1965        | 0.65<br>(0.53–0.78) |
| Sheffield        | 1966        | 0.68<br>(0.55–0.81) |
| Sheffield        | 1967        | 0.67<br>(0.55–0.81) |
| Sheffield        | 1968        | 0.71<br>(0.58–0.85) |
| Sheffield        | 1969        | 0.73<br>(0.6–0.87)  |
| Sheffield        | 1970        | 0.77<br>(0.63–0.91) |
| Sheffield        | 1971        | 0.8<br>(0.67–0.95)  |
| Sheffield        | 1972        | 0.81<br>(0.69–0.94) |
| Sheffield        | 1973        | 0.82<br>(0.71–0.95) |
| Sheffield        | 1974        | 0.84<br>(0.73–0.97) |
| Sheffield        | 1975        | 0.86<br>(0.74–0.97) |
| Sheffield        | 1976        | 0.84<br>(0.73–0.94) |
| Sheffield        | 1977        | 0.87<br>(0.77–0.96) |
| Sheffield        | 1978        | 0.92<br>(0.84–1.02) |
| Sheffield        | 1979        | 0.96<br>(0.87–1.05) |
| Sheffield        | 1980        | 0.95<br>(0.86–1.05) |
| Sheffield        | 1981        | 0.91<br>(0.84–0.98) |
| Sheffield        | 1982        | 0.94<br>(0.87–1.02) |
| Sheffield        | 1983        | 0.96<br>(0.9–1.02)  |
| Sheffield        | 1984        | 0.93<br>(0.88–1.0)  |
| Sheffield        | 1985        | 0.98<br>(0.92–1.04) |
| Sheffield        | 1986        | 1.02<br>(0.96–1.08) |
| Sheffield        | 1987        | 1.02<br>(0.96–1.09) |
| Sheffield        | 1988        | 1.02<br>(0.95–1.09) |
| Sheffield        | 1989        | 1.0<br>(0.93–1.08)  |
| Sheffield        | 1990        | 1.02<br>(0.96–1.08) |
| Sheffield        | 1991        | 1.01<br>(0.94–1.07) |
| Sheffield        | 1992        | 0.91<br>(0.85–0.98) |
| Sheffield        | 1993        | 0.95<br>(0.87–1.04) |
| Sheffield        | 1994        | 0.98<br>(0.9–1.05)  |
| Sheffield        | 1995        | 0.97<br>(0.89–1.06) |



**Table 15 Ratio of adjusted to unadjusted 5q0 values for scaled locations by year**

| <b>Geography</b> | <b>Year</b> | <b>Ratio</b>        |
|------------------|-------------|---------------------|
| Sheffield        | 1996        | 1.0<br>(0.92–1.09)  |
| Sheffield        | 1997        | 0.97<br>(0.89–1.07) |
| Sheffield        | 1998        | 0.99<br>(0.91–1.08) |
| Sheffield        | 1999        | 1.01<br>(0.93–1.1)  |
| Sheffield        | 2000        | 1.04<br>(0.93–1.14) |
| Sheffield        | 2001        | 1.01<br>(0.94–1.08) |
| Sheffield        | 2002        | 1.0<br>(0.93–1.08)  |
| Sheffield        | 2003        | 1.05<br>(0.96–1.14) |
| Sheffield        | 2004        | 1.01<br>(0.93–1.1)  |
| Sheffield        | 2005        | 1.04<br>(0.94–1.14) |
| Sheffield        | 2006        | 1.06<br>(0.97–1.17) |
| Sheffield        | 2007        | 1.07<br>(0.97–1.18) |
| Sheffield        | 2008        | 1.05<br>(0.96–1.16) |
| Sheffield        | 2009        | 1.04<br>(0.95–1.14) |
| Sheffield        | 2010        | 1.01<br>(0.92–1.09) |
| Sheffield        | 2011        | 1.0<br>(0.91–1.09)  |
| Sheffield        | 2012        | 0.96<br>(0.87–1.05) |
| Sheffield        | 2013        | 0.94<br>(0.86–1.02) |
| Sheffield        | 2014        | 0.94<br>(0.85–1.03) |
| Sheffield        | 2015        | 0.97<br>(0.88–1.07) |
| Sheffield        | 2016        | 0.92<br>(0.83–1.01) |
| Sheffield        | 2017        | 0.96<br>(0.82–1.11) |
| Wakefield        | 1950        | 0.56<br>(0.47–0.67) |
| Wakefield        | 1951        | 0.66<br>(0.54–0.79) |
| Wakefield        | 1952        | 0.62<br>(0.51–0.74) |
| Wakefield        | 1953        | 0.62<br>(0.52–0.75) |
| Wakefield        | 1954        | 0.59<br>(0.49–0.7)  |
| Wakefield        | 1955        | 0.59<br>(0.5–0.7)   |
| Wakefield        | 1956        | 0.59<br>(0.5–0.69)  |
| Wakefield        | 1957        | 0.6<br>(0.51–0.71)  |
| Wakefield        | 1958        | 0.6<br>(0.51–0.7)   |

**Table 15 Ratio of adjusted to unadjusted 5q0 values for scaled locations by year**

| <b>Geography</b> | <b>Year</b> | <b>Ratio</b>        |
|------------------|-------------|---------------------|
| Wakefield        | 1959        | 0.6<br>(0.51–0.71)  |
| Wakefield        | 1960        | 0.62<br>(0.52–0.73) |
| Wakefield        | 1961        | 0.63<br>(0.53–0.75) |
| Wakefield        | 1962        | 0.66<br>(0.54–0.79) |
| Wakefield        | 1963        | 0.67<br>(0.55–0.8)  |
| Wakefield        | 1964        | 0.66<br>(0.54–0.79) |
| Wakefield        | 1965        | 0.65<br>(0.53–0.78) |
| Wakefield        | 1966        | 0.68<br>(0.55–0.81) |
| Wakefield        | 1967        | 0.67<br>(0.55–0.81) |
| Wakefield        | 1968        | 0.71<br>(0.58–0.85) |
| Wakefield        | 1969        | 0.73<br>(0.6–0.87)  |
| Wakefield        | 1970        | 0.77<br>(0.63–0.91) |
| Wakefield        | 1971        | 0.8<br>(0.67–0.95)  |
| Wakefield        | 1972        | 0.81<br>(0.69–0.94) |
| Wakefield        | 1973        | 0.82<br>(0.71–0.95) |
| Wakefield        | 1974        | 0.85<br>(0.73–0.97) |
| Wakefield        | 1975        | 0.86<br>(0.74–0.97) |
| Wakefield        | 1976        | 0.84<br>(0.73–0.94) |
| Wakefield        | 1977        | 0.87<br>(0.77–0.96) |
| Wakefield        | 1978        | 0.92<br>(0.84–1.02) |
| Wakefield        | 1979        | 0.96<br>(0.87–1.05) |
| Wakefield        | 1980        | 0.95<br>(0.86–1.05) |
| Wakefield        | 1981        | 0.91<br>(0.84–0.98) |
| Wakefield        | 1982        | 0.94<br>(0.87–1.02) |
| Wakefield        | 1983        | 0.96<br>(0.9–1.02)  |
| Wakefield        | 1984        | 0.93<br>(0.88–1.0)  |
| Wakefield        | 1985        | 0.98<br>(0.92–1.04) |
| Wakefield        | 1986        | 1.02<br>(0.96–1.08) |
| Wakefield        | 1987        | 1.02<br>(0.96–1.09) |
| Wakefield        | 1988        | 1.02<br>(0.95–1.09) |
| Wakefield        | 1989        | 1.0<br>(0.93–1.08)  |

**Table 15 Ratio of adjusted to unadjusted 5q0 values for scaled locations by year**

| <b>Geography</b> | <b>Year</b> | <b>Ratio</b>        |
|------------------|-------------|---------------------|
| Wakefield        | 1990        | 1.02<br>(0.96–1.08) |
| Wakefield        | 1991        | 1.01<br>(0.94–1.07) |
| Wakefield        | 1992        | 0.91<br>(0.85–0.98) |
| Wakefield        | 1993        | 0.95<br>(0.87–1.04) |
| Wakefield        | 1994        | 0.98<br>(0.9–1.05)  |
| Wakefield        | 1995        | 0.97<br>(0.89–1.06) |
| Wakefield        | 1996        | 1.0<br>(0.92–1.09)  |
| Wakefield        | 1997        | 0.97<br>(0.89–1.07) |
| Wakefield        | 1998        | 0.99<br>(0.91–1.08) |
| Wakefield        | 1999        | 1.01<br>(0.93–1.1)  |
| Wakefield        | 2000        | 1.04<br>(0.93–1.14) |
| Wakefield        | 2001        | 1.01<br>(0.94–1.08) |
| Wakefield        | 2002        | 1.0<br>(0.93–1.08)  |
| Wakefield        | 2003        | 1.05<br>(0.96–1.14) |
| Wakefield        | 2004        | 1.01<br>(0.93–1.1)  |
| Wakefield        | 2005        | 1.04<br>(0.94–1.14) |
| Wakefield        | 2006        | 1.06<br>(0.97–1.17) |
| Wakefield        | 2007        | 1.07<br>(0.97–1.18) |
| Wakefield        | 2008        | 1.05<br>(0.96–1.16) |
| Wakefield        | 2009        | 1.04<br>(0.95–1.14) |
| Wakefield        | 2010        | 1.01<br>(0.92–1.09) |
| Wakefield        | 2011        | 1.0<br>(0.91–1.09)  |
| Wakefield        | 2012        | 0.96<br>(0.87–1.05) |
| Wakefield        | 2013        | 0.94<br>(0.86–1.02) |
| Wakefield        | 2014        | 0.94<br>(0.85–1.03) |
| Wakefield        | 2015        | 0.97<br>(0.88–1.07) |
| Wakefield        | 2016        | 0.92<br>(0.83–1.01) |
| Wakefield        | 2017        | 0.96<br>(0.82–1.11) |
| York             | 1950        | 0.56<br>(0.46–0.67) |
| York             | 1951        | 0.66<br>(0.54–0.79) |
| York             | 1952        | 0.62<br>(0.51–0.74) |

**Table 15 Ratio of adjusted to unadjusted 5q0 values for scaled locations by year**

| <b>Geography</b> | <b>Year</b> | <b>Ratio</b>        |
|------------------|-------------|---------------------|
| York             | 1953        | 0.62<br>(0.52–0.75) |
| York             | 1954        | 0.59<br>(0.49–0.7)  |
| York             | 1955        | 0.59<br>(0.5–0.7)   |
| York             | 1956        | 0.59<br>(0.49–0.69) |
| York             | 1957        | 0.6<br>(0.51–0.71)  |
| York             | 1958        | 0.59<br>(0.5–0.7)   |
| York             | 1959        | 0.6<br>(0.51–0.71)  |
| York             | 1960        | 0.62<br>(0.52–0.73) |
| York             | 1961        | 0.63<br>(0.53–0.75) |
| York             | 1962        | 0.66<br>(0.54–0.79) |
| York             | 1963        | 0.67<br>(0.55–0.8)  |
| York             | 1964        | 0.66<br>(0.54–0.79) |
| York             | 1965        | 0.65<br>(0.53–0.78) |
| York             | 1966        | 0.68<br>(0.55–0.81) |
| York             | 1967        | 0.67<br>(0.55–0.81) |
| York             | 1968        | 0.71<br>(0.58–0.85) |
| York             | 1969        | 0.73<br>(0.6–0.87)  |
| York             | 1970        | 0.77<br>(0.63–0.91) |
| York             | 1971        | 0.8<br>(0.67–0.95)  |
| York             | 1972        | 0.81<br>(0.69–0.94) |
| York             | 1973        | 0.82<br>(0.71–0.95) |
| York             | 1974        | 0.84<br>(0.73–0.97) |
| York             | 1975        | 0.86<br>(0.74–0.97) |
| York             | 1976        | 0.84<br>(0.73–0.94) |
| York             | 1977        | 0.87<br>(0.77–0.96) |
| York             | 1978        | 0.92<br>(0.84–1.02) |
| York             | 1979        | 0.96<br>(0.87–1.05) |
| York             | 1980        | 0.95<br>(0.86–1.05) |
| York             | 1981        | 0.91<br>(0.84–0.98) |
| York             | 1982        | 0.94<br>(0.87–1.02) |
| York             | 1983        | 0.96<br>(0.9–1.02)  |

**Table 15 Ratio of adjusted to unadjusted 5q0 values for scaled locations by year**

| <b>Geography</b> | <b>Year</b> | <b>Ratio</b>        |
|------------------|-------------|---------------------|
| York             | 1984        | 0.93<br>(0.88–1.0)  |
| York             | 1985        | 0.98<br>(0.92–1.04) |
| York             | 1986        | 1.02<br>(0.96–1.08) |
| York             | 1987        | 1.02<br>(0.96–1.09) |
| York             | 1988        | 1.02<br>(0.95–1.09) |
| York             | 1989        | 1.0<br>(0.93–1.08)  |
| York             | 1990        | 1.02<br>(0.96–1.08) |
| York             | 1991        | 1.01<br>(0.94–1.07) |
| York             | 1992        | 0.91<br>(0.85–0.98) |
| York             | 1993        | 0.95<br>(0.87–1.04) |
| York             | 1994        | 0.98<br>(0.9–1.05)  |
| York             | 1995        | 0.97<br>(0.89–1.06) |
| York             | 1996        | 1.0<br>(0.92–1.09)  |
| York             | 1997        | 0.97<br>(0.89–1.07) |
| York             | 1998        | 0.99<br>(0.91–1.08) |
| York             | 1999        | 1.01<br>(0.93–1.1)  |
| York             | 2000        | 1.04<br>(0.93–1.14) |
| York             | 2001        | 1.01<br>(0.94–1.08) |
| York             | 2002        | 1.0<br>(0.93–1.08)  |
| York             | 2003        | 1.05<br>(0.96–1.14) |
| York             | 2004        | 1.01<br>(0.93–1.1)  |
| York             | 2005        | 1.04<br>(0.94–1.14) |
| York             | 2006        | 1.06<br>(0.97–1.17) |
| York             | 2007        | 1.07<br>(0.97–1.18) |
| York             | 2008        | 1.05<br>(0.96–1.16) |
| York             | 2009        | 1.04<br>(0.95–1.14) |
| York             | 2010        | 1.01<br>(0.92–1.09) |
| York             | 2011        | 1.0<br>(0.91–1.09)  |
| York             | 2012        | 0.96<br>(0.87–1.05) |
| York             | 2013        | 0.94<br>(0.86–1.02) |
| York             | 2014        | 0.94<br>(0.85–1.03) |

**Table 15 Ratio of adjusted to unadjusted 5q0 values for scaled locations by year**

| <b>Geography</b> | <b>Year</b> | <b>Ratio</b>        |
|------------------|-------------|---------------------|
| York             | 2015        | 0.97<br>(0.88–1.07) |
| York             | 2016        | 0.92<br>(0.83–1.01) |
| York             | 2017        | 0.96<br>(0.82–1.11) |
| Northern Ireland | 1950        | 1.0<br>(1.0–1.0)    |
| Northern Ireland | 1951        | 1.0<br>(1.0–1.0)    |
| Northern Ireland | 1952        | 1.0<br>(1.0–1.0)    |
| Northern Ireland | 1953        | 1.0<br>(1.0–1.0)    |
| Northern Ireland | 1954        | 1.0<br>(1.0–1.0)    |
| Northern Ireland | 1955        | 1.0<br>(1.0–1.0)    |
| Northern Ireland | 1956        | 1.0<br>(1.0–1.0)    |
| Northern Ireland | 1957        | 1.0<br>(1.0–1.0)    |
| Northern Ireland | 1958        | 1.0<br>(1.0–1.0)    |
| Northern Ireland | 1959        | 1.0<br>(1.0–1.0)    |
| Northern Ireland | 1960        | 1.0<br>(1.0–1.0)    |
| Northern Ireland | 1961        | 1.0<br>(1.0–1.0)    |
| Northern Ireland | 1962        | 1.0<br>(1.0–1.0)    |
| Northern Ireland | 1963        | 1.0<br>(1.0–1.0)    |
| Northern Ireland | 1964        | 1.0<br>(1.0–1.0)    |
| Northern Ireland | 1965        | 1.0<br>(1.0–1.0)    |
| Northern Ireland | 1966        | 1.0<br>(1.0–1.0)    |
| Northern Ireland | 1967        | 1.0<br>(1.0–1.0)    |
| Northern Ireland | 1968        | 1.0<br>(1.0–1.0)    |
| Northern Ireland | 1969        | 1.0<br>(1.0–1.0)    |
| Northern Ireland | 1970        | 1.0<br>(1.0–1.0)    |
| Northern Ireland | 1971        | 1.0<br>(1.0–1.0)    |
| Northern Ireland | 1972        | 1.0<br>(1.0–1.0)    |
| Northern Ireland | 1973        | 1.0<br>(1.0–1.0)    |
| Northern Ireland | 1974        | 1.0<br>(1.0–1.0)    |
| Northern Ireland | 1975        | 1.0<br>(1.0–1.0)    |
| Northern Ireland | 1976        | 1.0<br>(1.0–1.0)    |
| Northern Ireland | 1977        | 1.0<br>(1.0–1.0)    |

**Table 15 Ratio of adjusted to unadjusted 5q0 values for scaled locations by year**

| <b>Geography</b> | <b>Year</b> | <b>Ratio</b>        |
|------------------|-------------|---------------------|
| Northern Ireland | 1978        | 1.0<br>(1.0–1.0)    |
| Northern Ireland | 1979        | 1.0<br>(1.0–1.0)    |
| Northern Ireland | 1980        | 1.0<br>(1.0–1.0)    |
| Northern Ireland | 1981        | 1.0<br>(0.98–1.03)  |
| Northern Ireland | 1982        | 1.01<br>(0.98–1.03) |
| Northern Ireland | 1983        | 1.01<br>(0.98–1.03) |
| Northern Ireland | 1984        | 1.0<br>(0.98–1.03)  |
| Northern Ireland | 1985        | 1.01<br>(0.98–1.04) |
| Northern Ireland | 1986        | 1.01<br>(0.99–1.04) |
| Northern Ireland | 1987        | 1.01<br>(0.98–1.04) |
| Northern Ireland | 1988        | 1.01<br>(0.98–1.04) |
| Northern Ireland | 1989        | 1.01<br>(0.98–1.03) |
| Northern Ireland | 1990        | 1.01<br>(0.98–1.04) |
| Northern Ireland | 1991        | 1.01<br>(0.98–1.05) |
| Northern Ireland | 1992        | 1.0<br>(0.97–1.03)  |
| Northern Ireland | 1993        | 1.01<br>(0.98–1.04) |
| Northern Ireland | 1994        | 1.01<br>(0.98–1.04) |
| Northern Ireland | 1995        | 1.01<br>(0.98–1.04) |
| Northern Ireland | 1996        | 1.01<br>(0.98–1.04) |
| Northern Ireland | 1997        | 1.0<br>(0.97–1.03)  |
| Northern Ireland | 1998        | 1.01<br>(0.98–1.04) |
| Northern Ireland | 1999        | 1.02<br>(0.99–1.06) |
| Northern Ireland | 2000        | 1.01<br>(0.94–1.08) |
| Northern Ireland | 2001        | 0.99<br>(0.96–1.02) |
| Northern Ireland | 2002        | 0.98<br>(0.95–1.01) |
| Northern Ireland | 2003        | 1.01<br>(0.97–1.05) |
| Northern Ireland | 2004        | 0.99<br>(0.96–1.02) |
| Northern Ireland | 2005        | 0.99<br>(0.96–1.03) |
| Northern Ireland | 2006        | 1.0<br>(0.97–1.04)  |
| Northern Ireland | 2007        | 1.0<br>(0.97–1.04)  |
| Northern Ireland | 2008        | 1.0<br>(0.97–1.04)  |

**Table 15 Ratio of adjusted to unadjusted 5q0 values for scaled locations by year**

| <b>Geography</b> | <b>Year</b> | <b>Ratio</b>        |
|------------------|-------------|---------------------|
| Northern Ireland | 2009        | 1.0<br>(0.96–1.03)  |
| Northern Ireland | 2010        | 0.99<br>(0.95–1.02) |
| Northern Ireland | 2011        | 1.0<br>(0.96–1.03)  |
| Northern Ireland | 2012        | 1.01<br>(0.97–1.04) |
| Northern Ireland | 2013        | 1.0<br>(0.97–1.04)  |
| Northern Ireland | 2014        | 1.0<br>(0.96–1.03)  |
| Northern Ireland | 2015        | 1.0<br>(0.97–1.04)  |
| Northern Ireland | 2016        | 1.0<br>(0.96–1.04)  |
| Northern Ireland | 2017        | 1.02<br>(0.92–1.12) |
| Scotland         | 1950        | 1.0<br>(1.0–1.0)    |
| Scotland         | 1951        | 1.0<br>(1.0–1.0)    |
| Scotland         | 1952        | 1.0<br>(1.0–1.0)    |
| Scotland         | 1953        | 1.0<br>(1.0–1.0)    |
| Scotland         | 1954        | 1.0<br>(1.0–1.0)    |
| Scotland         | 1955        | 1.0<br>(1.0–1.0)    |
| Scotland         | 1956        | 1.0<br>(1.0–1.0)    |
| Scotland         | 1957        | 1.0<br>(1.0–1.0)    |
| Scotland         | 1958        | 1.0<br>(1.0–1.0)    |
| Scotland         | 1959        | 1.0<br>(1.0–1.0)    |
| Scotland         | 1960        | 1.0<br>(1.0–1.0)    |
| Scotland         | 1961        | 1.0<br>(1.0–1.0)    |
| Scotland         | 1962        | 1.0<br>(1.0–1.0)    |
| Scotland         | 1963        | 1.0<br>(1.0–1.0)    |
| Scotland         | 1964        | 1.0<br>(1.0–1.0)    |
| Scotland         | 1965        | 1.0<br>(1.0–1.0)    |
| Scotland         | 1966        | 1.0<br>(1.0–1.0)    |
| Scotland         | 1967        | 1.0<br>(1.0–1.0)    |
| Scotland         | 1968        | 1.0<br>(1.0–1.0)    |
| Scotland         | 1969        | 1.0<br>(1.0–1.0)    |
| Scotland         | 1970        | 1.0<br>(1.0–1.0)    |
| Scotland         | 1971        | 1.0<br>(1.0–1.0)    |



**Table 15 Ratio of adjusted to unadjusted 5q0 values for scaled locations by year**

| <b>Geography</b> | <b>Year</b> | <b>Ratio</b>        |
|------------------|-------------|---------------------|
| Scotland         | 1972        | 1.0<br>(1.0–1.0)    |
| Scotland         | 1973        | 1.0<br>(1.0–1.0)    |
| Scotland         | 1974        | 1.0<br>(1.0–1.0)    |
| Scotland         | 1975        | 1.0<br>(1.0–1.0)    |
| Scotland         | 1976        | 1.0<br>(1.0–1.0)    |
| Scotland         | 1977        | 1.0<br>(1.0–1.0)    |
| Scotland         | 1978        | 1.0<br>(1.0–1.0)    |
| Scotland         | 1979        | 1.0<br>(1.0–1.0)    |
| Scotland         | 1980        | 1.0<br>(1.0–1.0)    |
| Scotland         | 1981        | 1.0<br>(0.98–1.03)  |
| Scotland         | 1982        | 1.01<br>(0.98–1.03) |
| Scotland         | 1983        | 1.01<br>(0.98–1.03) |
| Scotland         | 1984        | 1.0<br>(0.98–1.03)  |
| Scotland         | 1985        | 1.01<br>(0.98–1.04) |
| Scotland         | 1986        | 1.01<br>(0.99–1.04) |
| Scotland         | 1987        | 1.01<br>(0.98–1.04) |
| Scotland         | 1988        | 1.01<br>(0.98–1.04) |
| Scotland         | 1989        | 1.01<br>(0.98–1.03) |
| Scotland         | 1990        | 1.01<br>(0.98–1.04) |
| Scotland         | 1991        | 1.01<br>(0.98–1.05) |
| Scotland         | 1992        | 1.0<br>(0.97–1.03)  |
| Scotland         | 1993        | 1.01<br>(0.98–1.04) |
| Scotland         | 1994        | 1.01<br>(0.98–1.04) |
| Scotland         | 1995        | 1.01<br>(0.98–1.04) |
| Scotland         | 1996        | 1.01<br>(0.98–1.04) |
| Scotland         | 1997        | 1.0<br>(0.97–1.03)  |
| Scotland         | 1998        | 1.01<br>(0.98–1.04) |
| Scotland         | 1999        | 1.02<br>(0.99–1.06) |
| Scotland         | 2000        | 1.01<br>(0.94–1.08) |
| Scotland         | 2001        | 0.99<br>(0.96–1.02) |
| Scotland         | 2002        | 0.98<br>(0.95–1.01) |

**Table 15 Ratio of adjusted to unadjusted 5q0 values for scaled locations by year**

| <b>Geography</b> | <b>Year</b> | <b>Ratio</b>        |
|------------------|-------------|---------------------|
| Scotland         | 2003        | 1.01<br>(0.97–1.05) |
| Scotland         | 2004        | 0.99<br>(0.96–1.02) |
| Scotland         | 2005        | 0.99<br>(0.96–1.03) |
| Scotland         | 2006        | 1.0<br>(0.97–1.04)  |
| Scotland         | 2007        | 1.0<br>(0.97–1.04)  |
| Scotland         | 2008        | 1.0<br>(0.97–1.04)  |
| Scotland         | 2009        | 1.0<br>(0.96–1.03)  |
| Scotland         | 2010        | 0.99<br>(0.95–1.02) |
| Scotland         | 2011        | 1.0<br>(0.96–1.03)  |
| Scotland         | 2012        | 1.01<br>(0.97–1.04) |
| Scotland         | 2013        | 1.0<br>(0.97–1.04)  |
| Scotland         | 2014        | 1.0<br>(0.96–1.04)  |
| Scotland         | 2015        | 1.0<br>(0.97–1.04)  |
| Scotland         | 2016        | 1.0<br>(0.96–1.04)  |
| Scotland         | 2017        | 1.02<br>(0.92–1.12) |
| Wales            | 1950        | 1.07<br>(0.88–1.28) |
| Wales            | 1951        | 1.23<br>(1.01–1.47) |
| Wales            | 1952        | 1.15<br>(0.95–1.36) |
| Wales            | 1953        | 1.15<br>(0.95–1.37) |
| Wales            | 1954        | 1.07<br>(0.89–1.28) |
| Wales            | 1955        | 1.07<br>(0.89–1.28) |
| Wales            | 1956        | 1.04<br>(0.86–1.25) |
| Wales            | 1957        | 1.05<br>(0.87–1.26) |
| Wales            | 1958        | 1.02<br>(0.85–1.21) |
| Wales            | 1959        | 1.01<br>(0.84–1.2)  |
| Wales            | 1960        | 1.01<br>(0.84–1.21) |
| Wales            | 1961        | 1.02<br>(0.85–1.21) |
| Wales            | 1962        | 1.03<br>(0.85–1.24) |
| Wales            | 1963        | 1.03<br>(0.84–1.23) |
| Wales            | 1964        | 0.99<br>(0.8–1.19)  |
| Wales            | 1965        | 0.96<br>(0.77–1.15) |

**Table 15 Ratio of adjusted to unadjusted 5q0 values for scaled locations by year**

| <b>Geography</b> | <b>Year</b> | <b>Ratio</b>        |
|------------------|-------------|---------------------|
| Wales            | 1966        | 0.98<br>(0.79–1.17) |
| Wales            | 1967        | 0.95<br>(0.78–1.15) |
| Wales            | 1968        | 0.98<br>(0.8–1.18)  |
| Wales            | 1969        | 0.98<br>(0.82–1.18) |
| Wales            | 1970        | 1.01<br>(0.83–1.2)  |
| Wales            | 1971        | 1.03<br>(0.84–1.22) |
| Wales            | 1972        | 1.03<br>(0.85–1.21) |
| Wales            | 1973        | 1.02<br>(0.85–1.2)  |
| Wales            | 1974        | 1.03<br>(0.86–1.2)  |
| Wales            | 1975        | 1.02<br>(0.86–1.19) |
| Wales            | 1976        | 0.98<br>(0.84–1.13) |
| Wales            | 1977        | 1.0<br>(0.87–1.14)  |
| Wales            | 1978        | 1.04<br>(0.93–1.17) |
| Wales            | 1979        | 1.07<br>(0.98–1.17) |
| Wales            | 1980        | 1.04<br>(0.98–1.11) |
| Wales            | 1981        | 1.0<br>(0.98–1.03)  |
| Wales            | 1982        | 1.01<br>(0.98–1.03) |
| Wales            | 1983        | 1.01<br>(0.98–1.03) |
| Wales            | 1984        | 1.0<br>(0.98–1.03)  |
| Wales            | 1985        | 1.01<br>(0.98–1.04) |
| Wales            | 1986        | 1.01<br>(0.99–1.04) |
| Wales            | 1987        | 1.01<br>(0.98–1.04) |
| Wales            | 1988        | 1.01<br>(0.98–1.04) |
| Wales            | 1989        | 1.01<br>(0.98–1.03) |
| Wales            | 1990        | 1.01<br>(0.98–1.04) |
| Wales            | 1991        | 1.01<br>(0.98–1.05) |
| Wales            | 1992        | 1.0<br>(0.97–1.03)  |
| Wales            | 1993        | 1.01<br>(0.98–1.04) |
| Wales            | 1994        | 1.01<br>(0.98–1.04) |
| Wales            | 1995        | 1.01<br>(0.98–1.04) |
| Wales            | 1996        | 1.01<br>(0.98–1.04) |

**Table 15 Ratio of adjusted to unadjusted 5q0 values for scaled locations by year**

| <b>Geography</b> | <b>Year</b> | <b>Ratio</b>        |
|------------------|-------------|---------------------|
| Wales            | 1997        | 1.0<br>(0.97–1.03)  |
| Wales            | 1998        | 1.01<br>(0.98–1.04) |
| Wales            | 1999        | 1.02<br>(0.99–1.06) |
| Wales            | 2000        | 1.01<br>(0.94–1.08) |
| Wales            | 2001        | 0.99<br>(0.96–1.02) |
| Wales            | 2002        | 0.98<br>(0.95–1.01) |
| Wales            | 2003        | 1.01<br>(0.97–1.05) |
| Wales            | 2004        | 0.99<br>(0.96–1.02) |
| Wales            | 2005        | 0.99<br>(0.96–1.03) |
| Wales            | 2006        | 1.0<br>(0.97–1.04)  |
| Wales            | 2007        | 1.0<br>(0.97–1.04)  |
| Wales            | 2008        | 1.0<br>(0.97–1.04)  |
| Wales            | 2009        | 1.0<br>(0.96–1.03)  |
| Wales            | 2010        | 0.99<br>(0.95–1.02) |
| Wales            | 2011        | 1.0<br>(0.96–1.03)  |
| Wales            | 2012        | 1.01<br>(0.97–1.04) |
| Wales            | 2013        | 1.0<br>(0.97–1.04)  |
| Wales            | 2014        | 1.0<br>(0.96–1.04)  |
| Wales            | 2015        | 1.0<br>(0.97–1.04)  |
| Wales            | 2016        | 1.0<br>(0.96–1.04)  |
| Wales            | 2017        | 1.02<br>(0.92–1.12) |
| Mexico           | 1950        | 1.0<br>(1.0–1.0)    |
| Mexico           | 1951        | 1.0<br>(1.0–1.0)    |
| Mexico           | 1952        | 1.0<br>(1.0–1.0)    |
| Mexico           | 1953        | 1.0<br>(1.0–1.0)    |
| Mexico           | 1954        | 1.0<br>(1.0–1.0)    |
| Mexico           | 1955        | 1.0<br>(1.0–1.0)    |
| Mexico           | 1956        | 1.0<br>(1.0–1.0)    |
| Mexico           | 1957        | 1.0<br>(1.0–1.0)    |
| Mexico           | 1958        | 1.0<br>(1.0–1.0)    |
| Mexico           | 1959        | 1.0<br>(1.0–1.0)    |

**Table 15 Ratio of adjusted to unadjusted 5q0 values for scaled locations by year**

| <b>Geography</b> | <b>Year</b> | <b>Ratio</b>     |
|------------------|-------------|------------------|
| Mexico           | 1960        | 1.0<br>(1.0-1.0) |
| Mexico           | 1961        | 1.0<br>(1.0-1.0) |
| Mexico           | 1962        | 1.0<br>(1.0-1.0) |
| Mexico           | 1963        | 1.0<br>(1.0-1.0) |
| Mexico           | 1964        | 1.0<br>(1.0-1.0) |
| Mexico           | 1965        | 1.0<br>(1.0-1.0) |
| Mexico           | 1966        | 1.0<br>(1.0-1.0) |
| Mexico           | 1967        | 1.0<br>(1.0-1.0) |
| Mexico           | 1968        | 1.0<br>(1.0-1.0) |
| Mexico           | 1969        | 1.0<br>(1.0-1.0) |
| Mexico           | 1970        | 1.0<br>(1.0-1.0) |
| Mexico           | 1971        | 1.0<br>(1.0-1.0) |
| Mexico           | 1972        | 1.0<br>(1.0-1.0) |
| Mexico           | 1973        | 1.0<br>(1.0-1.0) |
| Mexico           | 1974        | 1.0<br>(1.0-1.0) |
| Mexico           | 1975        | 1.0<br>(1.0-1.0) |
| Mexico           | 1976        | 1.0<br>(1.0-1.0) |
| Mexico           | 1977        | 1.0<br>(1.0-1.0) |
| Mexico           | 1978        | 1.0<br>(1.0-1.0) |
| Mexico           | 1979        | 1.0<br>(1.0-1.0) |
| Mexico           | 1980        | 1.0<br>(1.0-1.0) |
| Mexico           | 1981        | 1.0<br>(1.0-1.0) |
| Mexico           | 1982        | 1.0<br>(1.0-1.0) |
| Mexico           | 1983        | 1.0<br>(1.0-1.0) |
| Mexico           | 1984        | 1.0<br>(1.0-1.0) |
| Mexico           | 1985        | 1.0<br>(1.0-1.0) |
| Mexico           | 1986        | 1.0<br>(1.0-1.0) |
| Mexico           | 1987        | 1.0<br>(1.0-1.0) |
| Mexico           | 1988        | 1.0<br>(1.0-1.0) |
| Mexico           | 1989        | 1.0<br>(1.0-1.0) |
| Mexico           | 1990        | 1.0<br>(1.0-1.0) |

**Table 15 Ratio of adjusted to unadjusted 5q0 values for scaled locations by year**

| <b>Geography</b> | <b>Year</b> | <b>Ratio</b>        |
|------------------|-------------|---------------------|
| Mexico           | 1991        | 1.0<br>(1.0–1.0)    |
| Mexico           | 1992        | 1.0<br>(1.0–1.0)    |
| Mexico           | 1993        | 1.0<br>(1.0–1.0)    |
| Mexico           | 1994        | 1.0<br>(1.0–1.0)    |
| Mexico           | 1995        | 1.0<br>(1.0–1.0)    |
| Mexico           | 1996        | 1.0<br>(1.0–1.0)    |
| Mexico           | 1997        | 1.0<br>(1.0–1.0)    |
| Mexico           | 1998        | 1.0<br>(1.0–1.0)    |
| Mexico           | 1999        | 1.0<br>(1.0–1.0)    |
| Mexico           | 2000        | 1.0<br>(1.0–1.0)    |
| Mexico           | 2001        | 1.0<br>(1.0–1.0)    |
| Mexico           | 2002        | 1.0<br>(1.0–1.0)    |
| Mexico           | 2003        | 1.0<br>(1.0–1.0)    |
| Mexico           | 2004        | 1.0<br>(1.0–1.0)    |
| Mexico           | 2005        | 1.0<br>(1.0–1.0)    |
| Mexico           | 2006        | 1.0<br>(1.0–1.0)    |
| Mexico           | 2007        | 1.0<br>(1.0–1.0)    |
| Mexico           | 2008        | 1.0<br>(1.0–1.0)    |
| Mexico           | 2009        | 1.0<br>(1.0–1.0)    |
| Mexico           | 2010        | 1.0<br>(1.0–1.0)    |
| Mexico           | 2011        | 1.0<br>(1.0–1.0)    |
| Mexico           | 2012        | 1.0<br>(1.0–1.0)    |
| Mexico           | 2013        | 1.0<br>(1.0–1.0)    |
| Mexico           | 2014        | 1.0<br>(1.0–1.0)    |
| Mexico           | 2015        | 1.0<br>(1.0–1.0)    |
| Mexico           | 2016        | 1.0<br>(1.0–1.0)    |
| Mexico           | 2017        | 1.0<br>(1.0–1.0)    |
| Aguascalientes   | 1950        | 1.35<br>(1.08–1.64) |
| Aguascalientes   | 1951        | 1.36<br>(1.12–1.63) |
| Aguascalientes   | 1952        | 1.32<br>(1.09–1.56) |
| Aguascalientes   | 1953        | 1.29<br>(1.1–1.52)  |

**Table 15 Ratio of adjusted to unadjusted 5q0 values for scaled locations by year**

| <b>Geography</b> | <b>Year</b> | <b>Ratio</b>        |
|------------------|-------------|---------------------|
| Aguascalientes   | 1954        | 1.26<br>(1.08–1.48) |
| Aguascalientes   | 1955        | 1.23<br>(1.07–1.43) |
| Aguascalientes   | 1956        | 1.2<br>(1.04–1.39)  |
| Aguascalientes   | 1957        | 1.19<br>(1.03–1.37) |
| Aguascalientes   | 1958        | 1.17<br>(1.01–1.36) |
| Aguascalientes   | 1959        | 1.15<br>(0.98–1.33) |
| Aguascalientes   | 1960        | 1.14<br>(0.98–1.31) |
| Aguascalientes   | 1961        | 1.13<br>(0.98–1.29) |
| Aguascalientes   | 1962        | 1.11<br>(0.96–1.26) |
| Aguascalientes   | 1963        | 1.1<br>(0.96–1.25)  |
| Aguascalientes   | 1964        | 1.09<br>(0.96–1.25) |
| Aguascalientes   | 1965        | 1.09<br>(0.96–1.24) |
| Aguascalientes   | 1966        | 1.1<br>(0.97–1.24)  |
| Aguascalientes   | 1967        | 1.1<br>(0.97–1.23)  |
| Aguascalientes   | 1968        | 1.11<br>(0.98–1.24) |
| Aguascalientes   | 1969        | 1.11<br>(0.99–1.26) |
| Aguascalientes   | 1970        | 1.12<br>(0.99–1.26) |
| Aguascalientes   | 1971        | 1.12<br>(1.0–1.25)  |
| Aguascalientes   | 1972        | 1.12<br>(1.01–1.25) |
| Aguascalientes   | 1973        | 1.13<br>(1.02–1.25) |
| Aguascalientes   | 1974        | 1.12<br>(1.01–1.24) |
| Aguascalientes   | 1975        | 1.11<br>(1.0–1.23)  |
| Aguascalientes   | 1976        | 1.11<br>(1.0–1.23)  |
| Aguascalientes   | 1977        | 1.11<br>(1.0–1.24)  |
| Aguascalientes   | 1978        | 1.1<br>(1.0–1.23)   |
| Aguascalientes   | 1979        | 1.09<br>(0.99–1.21) |
| Aguascalientes   | 1980        | 1.07<br>(0.98–1.18) |
| Aguascalientes   | 1981        | 1.06<br>(0.97–1.16) |
| Aguascalientes   | 1982        | 1.04<br>(0.95–1.14) |
| Aguascalientes   | 1983        | 1.03<br>(0.95–1.12) |
| Aguascalientes   | 1984        | 1.04<br>(0.96–1.12) |

**Table 15 Ratio of adjusted to unadjusted 5q0 values for scaled locations by year**

| <b>Geography</b> | <b>Year</b> | <b>Ratio</b>        |
|------------------|-------------|---------------------|
| Aguascalientes   | 1985        | 1.05<br>(0.97–1.14) |
| Aguascalientes   | 1986        | 1.06<br>(0.98–1.16) |
| Aguascalientes   | 1987        | 1.05<br>(0.96–1.14) |
| Aguascalientes   | 1988        | 1.03<br>(0.95–1.13) |
| Aguascalientes   | 1989        | 1.0<br>(0.92–1.08)  |
| Aguascalientes   | 1990        | 1.0<br>(0.92–1.08)  |
| Aguascalientes   | 1991        | 1.02<br>(0.93–1.12) |
| Aguascalientes   | 1992        | 1.03<br>(0.93–1.13) |
| Aguascalientes   | 1993        | 1.03<br>(0.93–1.15) |
| Aguascalientes   | 1994        | 1.03<br>(0.92–1.15) |
| Aguascalientes   | 1995        | 1.02<br>(0.91–1.14) |
| Aguascalientes   | 1996        | 1.02<br>(0.9–1.14)  |
| Aguascalientes   | 1997        | 1.02<br>(0.9–1.14)  |
| Aguascalientes   | 1998        | 1.03<br>(0.92–1.15) |
| Aguascalientes   | 1999        | 1.04<br>(0.93–1.15) |
| Aguascalientes   | 2000        | 1.05<br>(0.96–1.14) |
| Aguascalientes   | 2001        | 1.06<br>(0.98–1.14) |
| Aguascalientes   | 2002        | 1.07<br>(0.99–1.14) |
| Aguascalientes   | 2003        | 1.08<br>(1.0–1.16)  |
| Aguascalientes   | 2004        | 1.09<br>(1.0–1.19)  |
| Aguascalientes   | 2005        | 1.11<br>(1.0–1.24)  |
| Aguascalientes   | 2006        | 1.13<br>(1.0–1.27)  |
| Aguascalientes   | 2007        | 1.15<br>(1.01–1.3)  |
| Aguascalientes   | 2008        | 1.17<br>(1.02–1.34) |
| Aguascalientes   | 2009        | 1.19<br>(1.03–1.37) |
| Aguascalientes   | 2010        | 1.2<br>(1.04–1.39)  |
| Aguascalientes   | 2011        | 1.2<br>(1.04–1.4)   |
| Aguascalientes   | 2012        | 1.18<br>(1.02–1.37) |
| Aguascalientes   | 2013        | 1.18<br>(1.0–1.37)  |
| Aguascalientes   | 2014        | 1.18<br>(1.01–1.37) |
| Aguascalientes   | 2015        | 1.2<br>(1.02–1.41)  |



**Table 15 Ratio of adjusted to unadjusted 5q0 values for scaled locations by year**

| <b>Geography</b> | <b>Year</b> | <b>Ratio</b>        |
|------------------|-------------|---------------------|
| Aguascalientes   | 2016        | 1.18<br>(0.99–1.4)  |
| Aguascalientes   | 2017        | 1.19<br>(0.99–1.41) |
| Baja California  | 1950        | 1.34<br>(1.08–1.62) |
| Baja California  | 1951        | 1.35<br>(1.11–1.61) |
| Baja California  | 1952        | 1.31<br>(1.09–1.54) |
| Baja California  | 1953        | 1.28<br>(1.1–1.5)   |
| Baja California  | 1954        | 1.25<br>(1.08–1.46) |
| Baja California  | 1955        | 1.23<br>(1.06–1.42) |
| Baja California  | 1956        | 1.2<br>(1.04–1.38)  |
| Baja California  | 1957        | 1.18<br>(1.03–1.37) |
| Baja California  | 1958        | 1.17<br>(1.01–1.35) |
| Baja California  | 1959        | 1.14<br>(0.98–1.33) |
| Baja California  | 1960        | 1.14<br>(0.98–1.31) |
| Baja California  | 1961        | 1.13<br>(0.98–1.29) |
| Baja California  | 1962        | 1.1<br>(0.96–1.26)  |
| Baja California  | 1963        | 1.09<br>(0.96–1.24) |
| Baja California  | 1964        | 1.09<br>(0.96–1.24) |
| Baja California  | 1965        | 1.09<br>(0.96–1.24) |
| Baja California  | 1966        | 1.1<br>(0.97–1.24)  |
| Baja California  | 1967        | 1.1<br>(0.97–1.23)  |
| Baja California  | 1968        | 1.1<br>(0.98–1.24)  |
| Baja California  | 1969        | 1.11<br>(0.99–1.26) |
| Baja California  | 1970        | 1.12<br>(0.99–1.25) |
| Baja California  | 1971        | 1.12<br>(1.0–1.25)  |
| Baja California  | 1972        | 1.12<br>(1.01–1.24) |
| Baja California  | 1973        | 1.13<br>(1.02–1.25) |
| Baja California  | 1974        | 1.12<br>(1.01–1.24) |
| Baja California  | 1975        | 1.11<br>(1.0–1.23)  |
| Baja California  | 1976        | 1.11<br>(1.0–1.23)  |
| Baja California  | 1977        | 1.11<br>(1.0–1.24)  |
| Baja California  | 1978        | 1.1<br>(1.0–1.23)   |

**Table 15 Ratio of adjusted to unadjusted 5q0 values for scaled locations by year**

| <b>Geography</b> | <b>Year</b> | <b>Ratio</b>        |
|------------------|-------------|---------------------|
| Baja California  | 1979        | 1.09<br>(0.99–1.21) |
| Baja California  | 1980        | 1.07<br>(0.98–1.18) |
| Baja California  | 1981        | 1.06<br>(0.97–1.16) |
| Baja California  | 1982        | 1.04<br>(0.95–1.14) |
| Baja California  | 1983        | 1.03<br>(0.95–1.12) |
| Baja California  | 1984        | 1.04<br>(0.96–1.12) |
| Baja California  | 1985        | 1.05<br>(0.97–1.14) |
| Baja California  | 1986        | 1.06<br>(0.98–1.16) |
| Baja California  | 1987        | 1.05<br>(0.96–1.14) |
| Baja California  | 1988        | 1.03<br>(0.95–1.13) |
| Baja California  | 1989        | 1.0<br>(0.92–1.08)  |
| Baja California  | 1990        | 1.0<br>(0.92–1.08)  |
| Baja California  | 1991        | 1.02<br>(0.93–1.12) |
| Baja California  | 1992        | 1.03<br>(0.93–1.13) |
| Baja California  | 1993        | 1.03<br>(0.93–1.15) |
| Baja California  | 1994        | 1.03<br>(0.92–1.15) |
| Baja California  | 1995        | 1.02<br>(0.91–1.14) |
| Baja California  | 1996        | 1.02<br>(0.9–1.14)  |
| Baja California  | 1997        | 1.02<br>(0.9–1.14)  |
| Baja California  | 1998        | 1.03<br>(0.92–1.15) |
| Baja California  | 1999        | 1.04<br>(0.93–1.15) |
| Baja California  | 2000        | 1.05<br>(0.96–1.14) |
| Baja California  | 2001        | 1.06<br>(0.98–1.14) |
| Baja California  | 2002        | 1.07<br>(0.99–1.14) |
| Baja California  | 2003        | 1.08<br>(1.0–1.16)  |
| Baja California  | 2004        | 1.09<br>(1.0–1.19)  |
| Baja California  | 2005        | 1.11<br>(1.0–1.24)  |
| Baja California  | 2006        | 1.13<br>(1.0–1.27)  |
| Baja California  | 2007        | 1.15<br>(1.01–1.3)  |
| Baja California  | 2008        | 1.17<br>(1.02–1.34) |
| Baja California  | 2009        | 1.19<br>(1.03–1.37) |

**Table 15 Ratio of adjusted to unadjusted 5q0 values for scaled locations by year**

| <b>Geography</b>    | <b>Year</b> | <b>Ratio</b>        |
|---------------------|-------------|---------------------|
| Baja California     | 2010        | 1.2<br>(1.04–1.38)  |
| Baja California     | 2011        | 1.2<br>(1.04–1.39)  |
| Baja California     | 2012        | 1.18<br>(1.02–1.37) |
| Baja California     | 2013        | 1.18<br>(1.0–1.37)  |
| Baja California     | 2014        | 1.18<br>(1.01–1.37) |
| Baja California     | 2015        | 1.2<br>(1.02–1.41)  |
| Baja California     | 2016        | 1.18<br>(0.99–1.4)  |
| Baja California     | 2017        | 1.19<br>(0.99–1.41) |
| Baja California Sur | 1950        | 1.34<br>(1.08–1.62) |
| Baja California Sur | 1951        | 1.35<br>(1.11–1.61) |
| Baja California Sur | 1952        | 1.31<br>(1.09–1.54) |
| Baja California Sur | 1953        | 1.28<br>(1.1–1.5)   |
| Baja California Sur | 1954        | 1.25<br>(1.08–1.46) |
| Baja California Sur | 1955        | 1.23<br>(1.06–1.42) |
| Baja California Sur | 1956        | 1.2<br>(1.04–1.38)  |
| Baja California Sur | 1957        | 1.18<br>(1.03–1.37) |
| Baja California Sur | 1958        | 1.16<br>(1.01–1.35) |
| Baja California Sur | 1959        | 1.14<br>(0.98–1.32) |
| Baja California Sur | 1960        | 1.14<br>(0.98–1.31) |
| Baja California Sur | 1961        | 1.13<br>(0.98–1.28) |
| Baja California Sur | 1962        | 1.1<br>(0.96–1.26)  |
| Baja California Sur | 1963        | 1.09<br>(0.96–1.24) |
| Baja California Sur | 1964        | 1.09<br>(0.96–1.24) |
| Baja California Sur | 1965        | 1.09<br>(0.96–1.24) |
| Baja California Sur | 1966        | 1.1<br>(0.97–1.24)  |
| Baja California Sur | 1967        | 1.1<br>(0.97–1.23)  |
| Baja California Sur | 1968        | 1.1<br>(0.98–1.24)  |
| Baja California Sur | 1969        | 1.11<br>(0.99–1.25) |
| Baja California Sur | 1970        | 1.12<br>(0.99–1.25) |
| Baja California Sur | 1971        | 1.12<br>(1.0–1.25)  |
| Baja California Sur | 1972        | 1.12<br>(1.01–1.24) |

**Table 15 Ratio of adjusted to unadjusted 5q0 values for scaled locations by year**

| <b>Geography</b>    | <b>Year</b> | <b>Ratio</b>        |
|---------------------|-------------|---------------------|
| Baja California Sur | 1973        | 1.13<br>(1.02–1.25) |
| Baja California Sur | 1974        | 1.12<br>(1.01–1.24) |
| Baja California Sur | 1975        | 1.11<br>(1.0–1.23)  |
| Baja California Sur | 1976        | 1.11<br>(1.0–1.23)  |
| Baja California Sur | 1977        | 1.11<br>(1.0–1.24)  |
| Baja California Sur | 1978        | 1.1<br>(1.0–1.23)   |
| Baja California Sur | 1979        | 1.09<br>(0.99–1.21) |
| Baja California Sur | 1980        | 1.07<br>(0.98–1.18) |
| Baja California Sur | 1981        | 1.06<br>(0.97–1.17) |
| Baja California Sur | 1982        | 1.04<br>(0.95–1.14) |
| Baja California Sur | 1983        | 1.03<br>(0.95–1.12) |
| Baja California Sur | 1984        | 1.04<br>(0.96–1.12) |
| Baja California Sur | 1985        | 1.05<br>(0.97–1.14) |
| Baja California Sur | 1986        | 1.06<br>(0.97–1.16) |
| Baja California Sur | 1987        | 1.05<br>(0.96–1.14) |
| Baja California Sur | 1988        | 1.03<br>(0.95–1.13) |
| Baja California Sur | 1989        | 1.0<br>(0.92–1.08)  |
| Baja California Sur | 1990        | 1.0<br>(0.92–1.08)  |
| Baja California Sur | 1991        | 1.02<br>(0.93–1.12) |
| Baja California Sur | 1992        | 1.03<br>(0.93–1.13) |
| Baja California Sur | 1993        | 1.03<br>(0.93–1.16) |
| Baja California Sur | 1994        | 1.03<br>(0.92–1.15) |
| Baja California Sur | 1995        | 1.02<br>(0.91–1.15) |
| Baja California Sur | 1996        | 1.02<br>(0.9–1.14)  |
| Baja California Sur | 1997        | 1.02<br>(0.9–1.14)  |
| Baja California Sur | 1998        | 1.03<br>(0.92–1.15) |
| Baja California Sur | 1999        | 1.04<br>(0.93–1.15) |
| Baja California Sur | 2000        | 1.05<br>(0.96–1.14) |
| Baja California Sur | 2001        | 1.06<br>(0.98–1.14) |
| Baja California Sur | 2002        | 1.07<br>(0.99–1.14) |
| Baja California Sur | 2003        | 1.08<br>(1.0–1.16)  |

**Table 15 Ratio of adjusted to unadjusted 5q0 values for scaled locations by year**

| <b>Geography</b>    | <b>Year</b> | <b>Ratio</b>        |
|---------------------|-------------|---------------------|
| Baja California Sur | 2004        | 1.09<br>(1.0–1.19)  |
| Baja California Sur | 2005        | 1.11<br>(1.0–1.24)  |
| Baja California Sur | 2006        | 1.13<br>(1.0–1.27)  |
| Baja California Sur | 2007        | 1.15<br>(1.01–1.3)  |
| Baja California Sur | 2008        | 1.17<br>(1.02–1.34) |
| Baja California Sur | 2009        | 1.19<br>(1.03–1.37) |
| Baja California Sur | 2010        | 1.2<br>(1.04–1.38)  |
| Baja California Sur | 2011        | 1.2<br>(1.04–1.4)   |
| Baja California Sur | 2012        | 1.18<br>(1.02–1.37) |
| Baja California Sur | 2013        | 1.18<br>(1.0–1.37)  |
| Baja California Sur | 2014        | 1.18<br>(1.01–1.37) |
| Baja California Sur | 2015        | 1.2<br>(1.02–1.41)  |
| Baja California Sur | 2016        | 1.18<br>(0.99–1.4)  |
| Baja California Sur | 2017        | 1.19<br>(0.99–1.41) |
| Campeche            | 1950        | 1.34<br>(1.08–1.63) |
| Campeche            | 1951        | 1.35<br>(1.11–1.62) |
| Campeche            | 1952        | 1.31<br>(1.09–1.54) |
| Campeche            | 1953        | 1.29<br>(1.1–1.51)  |
| Campeche            | 1954        | 1.25<br>(1.08–1.47) |
| Campeche            | 1955        | 1.23<br>(1.07–1.42) |
| Campeche            | 1956        | 1.2<br>(1.04–1.38)  |
| Campeche            | 1957        | 1.19<br>(1.03–1.37) |
| Campeche            | 1958        | 1.17<br>(1.01–1.35) |
| Campeche            | 1959        | 1.14<br>(0.98–1.33) |
| Campeche            | 1960        | 1.14<br>(0.98–1.31) |
| Campeche            | 1961        | 1.13<br>(0.98–1.28) |
| Campeche            | 1962        | 1.1<br>(0.96–1.26)  |
| Campeche            | 1963        | 1.09<br>(0.96–1.24) |
| Campeche            | 1964        | 1.09<br>(0.96–1.24) |
| Campeche            | 1965        | 1.09<br>(0.96–1.24) |
| Campeche            | 1966        | 1.1<br>(0.97–1.24)  |

**Table 15 Ratio of adjusted to unadjusted 5q0 values for scaled locations by year**

| <b>Geography</b> | <b>Year</b> | <b>Ratio</b>        |
|------------------|-------------|---------------------|
| Campeche         | 1967        | 1.1<br>(0.97–1.23)  |
| Campeche         | 1968        | 1.1<br>(0.98–1.24)  |
| Campeche         | 1969        | 1.11<br>(0.99–1.25) |
| Campeche         | 1970        | 1.12<br>(0.99–1.25) |
| Campeche         | 1971        | 1.12<br>(1.0–1.24)  |
| Campeche         | 1972        | 1.12<br>(1.01–1.24) |
| Campeche         | 1973        | 1.13<br>(1.02–1.24) |
| Campeche         | 1974        | 1.12<br>(1.01–1.24) |
| Campeche         | 1975        | 1.11<br>(1.0–1.23)  |
| Campeche         | 1976        | 1.11<br>(1.0–1.23)  |
| Campeche         | 1977        | 1.11<br>(1.0–1.23)  |
| Campeche         | 1978        | 1.1<br>(1.0–1.23)   |
| Campeche         | 1979        | 1.09<br>(0.99–1.21) |
| Campeche         | 1980        | 1.07<br>(0.98–1.18) |
| Campeche         | 1981        | 1.06<br>(0.97–1.16) |
| Campeche         | 1982        | 1.04<br>(0.95–1.14) |
| Campeche         | 1983        | 1.03<br>(0.95–1.12) |
| Campeche         | 1984        | 1.04<br>(0.96–1.12) |
| Campeche         | 1985        | 1.05<br>(0.97–1.14) |
| Campeche         | 1986        | 1.06<br>(0.98–1.16) |
| Campeche         | 1987        | 1.05<br>(0.96–1.14) |
| Campeche         | 1988        | 1.03<br>(0.95–1.13) |
| Campeche         | 1989        | 1.0<br>(0.92–1.08)  |
| Campeche         | 1990        | 1.0<br>(0.92–1.08)  |
| Campeche         | 1991        | 1.02<br>(0.93–1.12) |
| Campeche         | 1992        | 1.03<br>(0.93–1.13) |
| Campeche         | 1993        | 1.03<br>(0.93–1.15) |
| Campeche         | 1994        | 1.03<br>(0.92–1.15) |
| Campeche         | 1995        | 1.02<br>(0.91–1.14) |
| Campeche         | 1996        | 1.02<br>(0.9–1.14)  |
| Campeche         | 1997        | 1.02<br>(0.9–1.14)  |

**Table 15 Ratio of adjusted to unadjusted 5q0 values for scaled locations by year**

| <b>Geography</b> | <b>Year</b> | <b>Ratio</b>        |
|------------------|-------------|---------------------|
| Campeche         | 1998        | 1.03<br>(0.92–1.15) |
| Campeche         | 1999        | 1.04<br>(0.93–1.15) |
| Campeche         | 2000        | 1.05<br>(0.96–1.14) |
| Campeche         | 2001        | 1.06<br>(0.98–1.14) |
| Campeche         | 2002        | 1.07<br>(0.99–1.14) |
| Campeche         | 2003        | 1.08<br>(1.0–1.16)  |
| Campeche         | 2004        | 1.09<br>(1.0–1.19)  |
| Campeche         | 2005        | 1.11<br>(1.0–1.24)  |
| Campeche         | 2006        | 1.13<br>(1.0–1.27)  |
| Campeche         | 2007        | 1.15<br>(1.01–1.3)  |
| Campeche         | 2008        | 1.17<br>(1.02–1.34) |
| Campeche         | 2009        | 1.19<br>(1.03–1.37) |
| Campeche         | 2010        | 1.2<br>(1.04–1.38)  |
| Campeche         | 2011        | 1.2<br>(1.04–1.39)  |
| Campeche         | 2012        | 1.18<br>(1.02–1.36) |
| Campeche         | 2013        | 1.18<br>(1.0–1.37)  |
| Campeche         | 2014        | 1.18<br>(1.01–1.37) |
| Campeche         | 2015        | 1.2<br>(1.02–1.41)  |
| Campeche         | 2016        | 1.18<br>(0.99–1.4)  |
| Campeche         | 2017        | 1.19<br>(0.99–1.41) |
| Chiapas          | 1950        | 1.34<br>(1.08–1.62) |
| Chiapas          | 1951        | 1.34<br>(1.11–1.6)  |
| Chiapas          | 1952        | 1.3<br>(1.09–1.53)  |
| Chiapas          | 1953        | 1.28<br>(1.1–1.5)   |
| Chiapas          | 1954        | 1.25<br>(1.08–1.46) |
| Chiapas          | 1955        | 1.23<br>(1.06–1.41) |
| Chiapas          | 1956        | 1.2<br>(1.04–1.37)  |
| Chiapas          | 1957        | 1.18<br>(1.03–1.36) |
| Chiapas          | 1958        | 1.16<br>(1.01–1.34) |
| Chiapas          | 1959        | 1.14<br>(0.98–1.32) |
| Chiapas          | 1960        | 1.14<br>(0.98–1.3)  |

**Table 15 Ratio of adjusted to unadjusted 5q0 values for scaled locations by year**

| <b>Geography</b> | <b>Year</b> | <b>Ratio</b>        |
|------------------|-------------|---------------------|
| Chiapas          | 1961        | 1.12<br>(0.98–1.28) |
| Chiapas          | 1962        | 1.1<br>(0.96–1.25)  |
| Chiapas          | 1963        | 1.09<br>(0.96–1.24) |
| Chiapas          | 1964        | 1.09<br>(0.96–1.24) |
| Chiapas          | 1965        | 1.09<br>(0.96–1.23) |
| Chiapas          | 1966        | 1.1<br>(0.97–1.23)  |
| Chiapas          | 1967        | 1.1<br>(0.97–1.22)  |
| Chiapas          | 1968        | 1.1<br>(0.98–1.24)  |
| Chiapas          | 1969        | 1.11<br>(0.99–1.25) |
| Chiapas          | 1970        | 1.12<br>(0.99–1.25) |
| Chiapas          | 1971        | 1.11<br>(1.0–1.24)  |
| Chiapas          | 1972        | 1.12<br>(1.01–1.24) |
| Chiapas          | 1973        | 1.13<br>(1.02–1.24) |
| Chiapas          | 1974        | 1.11<br>(1.01–1.23) |
| Chiapas          | 1975        | 1.11<br>(1.0–1.23)  |
| Chiapas          | 1976        | 1.11<br>(1.0–1.22)  |
| Chiapas          | 1977        | 1.11<br>(1.0–1.23)  |
| Chiapas          | 1978        | 1.1<br>(1.0–1.23)   |
| Chiapas          | 1979        | 1.09<br>(0.99–1.21) |
| Chiapas          | 1980        | 1.07<br>(0.98–1.17) |
| Chiapas          | 1981        | 1.06<br>(0.97–1.16) |
| Chiapas          | 1982        | 1.04<br>(0.95–1.13) |
| Chiapas          | 1983        | 1.03<br>(0.95–1.11) |
| Chiapas          | 1984        | 1.04<br>(0.96–1.12) |
| Chiapas          | 1985        | 1.05<br>(0.97–1.14) |
| Chiapas          | 1986        | 1.06<br>(0.98–1.16) |
| Chiapas          | 1987        | 1.05<br>(0.96–1.14) |
| Chiapas          | 1988        | 1.03<br>(0.95–1.12) |
| Chiapas          | 1989        | 1.0<br>(0.92–1.08)  |
| Chiapas          | 1990        | 1.0<br>(0.92–1.08)  |
| Chiapas          | 1991        | 1.02<br>(0.93–1.12) |



**Table 15 Ratio of adjusted to unadjusted 5q0 values for scaled locations by year**

| <b>Geography</b> | <b>Year</b> | <b>Ratio</b>        |
|------------------|-------------|---------------------|
| Chiapas          | 1992        | 1.03<br>(0.93–1.13) |
| Chiapas          | 1993        | 1.03<br>(0.93–1.15) |
| Chiapas          | 1994        | 1.03<br>(0.92–1.15) |
| Chiapas          | 1995        | 1.02<br>(0.91–1.14) |
| Chiapas          | 1996        | 1.02<br>(0.9–1.14)  |
| Chiapas          | 1997        | 1.02<br>(0.9–1.14)  |
| Chiapas          | 1998        | 1.03<br>(0.92–1.15) |
| Chiapas          | 1999        | 1.04<br>(0.93–1.14) |
| Chiapas          | 2000        | 1.05<br>(0.96–1.14) |
| Chiapas          | 2001        | 1.06<br>(0.98–1.14) |
| Chiapas          | 2002        | 1.07<br>(0.99–1.14) |
| Chiapas          | 2003        | 1.08<br>(1.0–1.16)  |
| Chiapas          | 2004        | 1.09<br>(1.0–1.19)  |
| Chiapas          | 2005        | 1.11<br>(1.0–1.23)  |
| Chiapas          | 2006        | 1.13<br>(1.0–1.27)  |
| Chiapas          | 2007        | 1.15<br>(1.01–1.3)  |
| Chiapas          | 2008        | 1.17<br>(1.02–1.33) |
| Chiapas          | 2009        | 1.19<br>(1.03–1.37) |
| Chiapas          | 2010        | 1.2<br>(1.04–1.38)  |
| Chiapas          | 2011        | 1.2<br>(1.04–1.39)  |
| Chiapas          | 2012        | 1.18<br>(1.02–1.36) |
| Chiapas          | 2013        | 1.17<br>(1.0–1.36)  |
| Chiapas          | 2014        | 1.18<br>(1.01–1.37) |
| Chiapas          | 2015        | 1.2<br>(1.02–1.4)   |
| Chiapas          | 2016        | 1.18<br>(0.99–1.4)  |
| Chiapas          | 2017        | 1.19<br>(0.99–1.41) |
| Chihuahua        | 1950        | 1.34<br>(1.08–1.62) |
| Chihuahua        | 1951        | 1.35<br>(1.11–1.61) |
| Chihuahua        | 1952        | 1.31<br>(1.09–1.54) |
| Chihuahua        | 1953        | 1.28<br>(1.1–1.5)   |
| Chihuahua        | 1954        | 1.25<br>(1.08–1.46) |

**Table 15 Ratio of adjusted to unadjusted 5q0 values for scaled locations by year**

| <b>Geography</b> | <b>Year</b> | <b>Ratio</b>        |
|------------------|-------------|---------------------|
| Chihuahua        | 1955        | 1.23<br>(1.06–1.42) |
| Chihuahua        | 1956        | 1.2<br>(1.04–1.38)  |
| Chihuahua        | 1957        | 1.18<br>(1.03–1.37) |
| Chihuahua        | 1958        | 1.16<br>(1.01–1.35) |
| Chihuahua        | 1959        | 1.14<br>(0.98–1.32) |
| Chihuahua        | 1960        | 1.14<br>(0.98–1.31) |
| Chihuahua        | 1961        | 1.13<br>(0.98–1.28) |
| Chihuahua        | 1962        | 1.1<br>(0.96–1.25)  |
| Chihuahua        | 1963        | 1.09<br>(0.96–1.24) |
| Chihuahua        | 1964        | 1.09<br>(0.96–1.24) |
| Chihuahua        | 1965        | 1.09<br>(0.96–1.24) |
| Chihuahua        | 1966        | 1.1<br>(0.97–1.24)  |
| Chihuahua        | 1967        | 1.1<br>(0.97–1.23)  |
| Chihuahua        | 1968        | 1.1<br>(0.98–1.24)  |
| Chihuahua        | 1969        | 1.11<br>(0.99–1.25) |
| Chihuahua        | 1970        | 1.12<br>(0.99–1.25) |
| Chihuahua        | 1971        | 1.12<br>(1.0–1.25)  |
| Chihuahua        | 1972        | 1.12<br>(1.01–1.24) |
| Chihuahua        | 1973        | 1.13<br>(1.02–1.24) |
| Chihuahua        | 1974        | 1.12<br>(1.01–1.24) |
| Chihuahua        | 1975        | 1.11<br>(1.0–1.23)  |
| Chihuahua        | 1976        | 1.11<br>(1.0–1.23)  |
| Chihuahua        | 1977        | 1.11<br>(1.0–1.23)  |
| Chihuahua        | 1978        | 1.1<br>(1.0–1.23)   |
| Chihuahua        | 1979        | 1.09<br>(0.99–1.21) |
| Chihuahua        | 1980        | 1.07<br>(0.98–1.18) |
| Chihuahua        | 1981        | 1.06<br>(0.97–1.16) |
| Chihuahua        | 1982        | 1.04<br>(0.95–1.14) |
| Chihuahua        | 1983        | 1.03<br>(0.95–1.12) |
| Chihuahua        | 1984        | 1.04<br>(0.96–1.12) |
| Chihuahua        | 1985        | 1.05<br>(0.97–1.14) |

**Table 15 Ratio of adjusted to unadjusted 5q0 values for scaled locations by year**

| <b>Geography</b> | <b>Year</b> | <b>Ratio</b>        |
|------------------|-------------|---------------------|
| Chihuahua        | 1986        | 1.06<br>(0.98–1.16) |
| Chihuahua        | 1987        | 1.05<br>(0.96–1.14) |
| Chihuahua        | 1988        | 1.03<br>(0.95–1.13) |
| Chihuahua        | 1989        | 1.0<br>(0.92–1.08)  |
| Chihuahua        | 1990        | 1.0<br>(0.92–1.08)  |
| Chihuahua        | 1991        | 1.02<br>(0.93–1.12) |
| Chihuahua        | 1992        | 1.03<br>(0.93–1.13) |
| Chihuahua        | 1993        | 1.03<br>(0.93–1.15) |
| Chihuahua        | 1994        | 1.03<br>(0.92–1.15) |
| Chihuahua        | 1995        | 1.02<br>(0.91–1.14) |
| Chihuahua        | 1996        | 1.02<br>(0.9–1.14)  |
| Chihuahua        | 1997        | 1.02<br>(0.9–1.14)  |
| Chihuahua        | 1998        | 1.03<br>(0.92–1.15) |
| Chihuahua        | 1999        | 1.04<br>(0.93–1.14) |
| Chihuahua        | 2000        | 1.05<br>(0.96–1.14) |
| Chihuahua        | 2001        | 1.06<br>(0.98–1.14) |
| Chihuahua        | 2002        | 1.07<br>(0.99–1.14) |
| Chihuahua        | 2003        | 1.08<br>(1.0–1.16)  |
| Chihuahua        | 2004        | 1.09<br>(1.0–1.19)  |
| Chihuahua        | 2005        | 1.11<br>(1.0–1.24)  |
| Chihuahua        | 2006        | 1.13<br>(1.0–1.27)  |
| Chihuahua        | 2007        | 1.15<br>(1.01–1.3)  |
| Chihuahua        | 2008        | 1.17<br>(1.02–1.34) |
| Chihuahua        | 2009        | 1.19<br>(1.03–1.37) |
| Chihuahua        | 2010        | 1.2<br>(1.04–1.38)  |
| Chihuahua        | 2011        | 1.2<br>(1.04–1.39)  |
| Chihuahua        | 2012        | 1.18<br>(1.02–1.36) |
| Chihuahua        | 2013        | 1.17<br>(1.0–1.36)  |
| Chihuahua        | 2014        | 1.18<br>(1.01–1.37) |
| Chihuahua        | 2015        | 1.2<br>(1.02–1.41)  |
| Chihuahua        | 2016        | 1.18<br>(0.99–1.4)  |

**Table 15 Ratio of adjusted to unadjusted 5q0 values for scaled locations by year**

| <b>Geography</b> | <b>Year</b> | <b>Ratio</b>        |
|------------------|-------------|---------------------|
| Chihuahua        | 2017        | 1.19<br>(0.99–1.41) |
| Coahuila         | 1950        | 1.34<br>(1.08–1.62) |
| Coahuila         | 1951        | 1.35<br>(1.11–1.61) |
| Coahuila         | 1952        | 1.31<br>(1.09–1.54) |
| Coahuila         | 1953        | 1.28<br>(1.1–1.5)   |
| Coahuila         | 1954        | 1.25<br>(1.08–1.46) |
| Coahuila         | 1955        | 1.23<br>(1.06–1.42) |
| Coahuila         | 1956        | 1.2<br>(1.04–1.38)  |
| Coahuila         | 1957        | 1.18<br>(1.03–1.37) |
| Coahuila         | 1958        | 1.17<br>(1.01–1.35) |
| Coahuila         | 1959        | 1.14<br>(0.98–1.32) |
| Coahuila         | 1960        | 1.14<br>(0.98–1.31) |
| Coahuila         | 1961        | 1.13<br>(0.98–1.29) |
| Coahuila         | 1962        | 1.1<br>(0.96–1.26)  |
| Coahuila         | 1963        | 1.09<br>(0.96–1.24) |
| Coahuila         | 1964        | 1.09<br>(0.96–1.24) |
| Coahuila         | 1965        | 1.09<br>(0.96–1.24) |
| Coahuila         | 1966        | 1.1<br>(0.97–1.24)  |
| Coahuila         | 1967        | 1.1<br>(0.97–1.23)  |
| Coahuila         | 1968        | 1.1<br>(0.98–1.24)  |
| Coahuila         | 1969        | 1.11<br>(0.99–1.25) |
| Coahuila         | 1970        | 1.12<br>(0.99–1.25) |
| Coahuila         | 1971        | 1.12<br>(1.0–1.24)  |
| Coahuila         | 1972        | 1.12<br>(1.01–1.24) |
| Coahuila         | 1973        | 1.13<br>(1.02–1.24) |
| Coahuila         | 1974        | 1.12<br>(1.01–1.24) |
| Coahuila         | 1975        | 1.11<br>(1.0–1.23)  |
| Coahuila         | 1976        | 1.11<br>(1.0–1.23)  |
| Coahuila         | 1977        | 1.11<br>(1.0–1.23)  |
| Coahuila         | 1978        | 1.1<br>(1.0–1.23)   |
| Coahuila         | 1979        | 1.09<br>(0.99–1.21) |

**Table 15 Ratio of adjusted to unadjusted 5q0 values for scaled locations by year**

| <b>Geography</b> | <b>Year</b> | <b>Ratio</b>        |
|------------------|-------------|---------------------|
| Coahuila         | 1980        | 1.07<br>(0.98–1.18) |
| Coahuila         | 1981        | 1.06<br>(0.97–1.16) |
| Coahuila         | 1982        | 1.04<br>(0.95–1.14) |
| Coahuila         | 1983        | 1.03<br>(0.95–1.12) |
| Coahuila         | 1984        | 1.04<br>(0.96–1.12) |
| Coahuila         | 1985        | 1.05<br>(0.97–1.14) |
| Coahuila         | 1986        | 1.06<br>(0.98–1.16) |
| Coahuila         | 1987        | 1.05<br>(0.96–1.14) |
| Coahuila         | 1988        | 1.03<br>(0.95–1.13) |
| Coahuila         | 1989        | 1.0<br>(0.92–1.08)  |
| Coahuila         | 1990        | 1.0<br>(0.92–1.08)  |
| Coahuila         | 1991        | 1.02<br>(0.93–1.12) |
| Coahuila         | 1992        | 1.03<br>(0.93–1.13) |
| Coahuila         | 1993        | 1.03<br>(0.93–1.15) |
| Coahuila         | 1994        | 1.03<br>(0.92–1.15) |
| Coahuila         | 1995        | 1.02<br>(0.91–1.14) |
| Coahuila         | 1996        | 1.02<br>(0.9–1.14)  |
| Coahuila         | 1997        | 1.02<br>(0.9–1.14)  |
| Coahuila         | 1998        | 1.03<br>(0.92–1.15) |
| Coahuila         | 1999        | 1.04<br>(0.93–1.15) |
| Coahuila         | 2000        | 1.05<br>(0.96–1.14) |
| Coahuila         | 2001        | 1.06<br>(0.98–1.14) |
| Coahuila         | 2002        | 1.07<br>(0.99–1.14) |
| Coahuila         | 2003        | 1.08<br>(1.0–1.16)  |
| Coahuila         | 2004        | 1.09<br>(1.0–1.19)  |
| Coahuila         | 2005        | 1.11<br>(1.0–1.24)  |
| Coahuila         | 2006        | 1.13<br>(1.0–1.27)  |
| Coahuila         | 2007        | 1.15<br>(1.01–1.3)  |
| Coahuila         | 2008        | 1.17<br>(1.02–1.34) |
| Coahuila         | 2009        | 1.19<br>(1.03–1.37) |
| Coahuila         | 2010        | 1.2<br>(1.04–1.39)  |

**Table 15 Ratio of adjusted to unadjusted 5q0 values for scaled locations by year**

| <b>Geography</b> | <b>Year</b> | <b>Ratio</b>        |
|------------------|-------------|---------------------|
| Coahuila         | 2011        | 1.2<br>(1.04–1.39)  |
| Coahuila         | 2012        | 1.18<br>(1.02–1.37) |
| Coahuila         | 2013        | 1.18<br>(1.0–1.37)  |
| Coahuila         | 2014        | 1.18<br>(1.01–1.37) |
| Coahuila         | 2015        | 1.2<br>(1.02–1.41)  |
| Coahuila         | 2016        | 1.18<br>(0.99–1.4)  |
| Coahuila         | 2017        | 1.19<br>(0.99–1.41) |
| Colima           | 1950        | 1.34<br>(1.08–1.62) |
| Colima           | 1951        | 1.34<br>(1.11–1.61) |
| Colima           | 1952        | 1.3<br>(1.09–1.53)  |
| Colima           | 1953        | 1.28<br>(1.1–1.5)   |
| Colima           | 1954        | 1.25<br>(1.08–1.45) |
| Colima           | 1955        | 1.23<br>(1.06–1.41) |
| Colima           | 1956        | 1.2<br>(1.04–1.37)  |
| Colima           | 1957        | 1.18<br>(1.03–1.36) |
| Colima           | 1958        | 1.16<br>(1.01–1.35) |
| Colima           | 1959        | 1.14<br>(0.98–1.32) |
| Colima           | 1960        | 1.14<br>(0.98–1.31) |
| Colima           | 1961        | 1.12<br>(0.98–1.28) |
| Colima           | 1962        | 1.1<br>(0.96–1.25)  |
| Colima           | 1963        | 1.09<br>(0.96–1.24) |
| Colima           | 1964        | 1.09<br>(0.96–1.24) |
| Colima           | 1965        | 1.09<br>(0.96–1.23) |
| Colima           | 1966        | 1.1<br>(0.97–1.24)  |
| Colima           | 1967        | 1.1<br>(0.97–1.23)  |
| Colima           | 1968        | 1.1<br>(0.98–1.24)  |
| Colima           | 1969        | 1.11<br>(0.99–1.25) |
| Colima           | 1970        | 1.12<br>(0.99–1.25) |
| Colima           | 1971        | 1.12<br>(1.0–1.24)  |
| Colima           | 1972        | 1.12<br>(1.01–1.24) |
| Colima           | 1973        | 1.13<br>(1.02–1.24) |

**Table 15 Ratio of adjusted to unadjusted 5q0 values for scaled locations by year**

| <b>Geography</b> | <b>Year</b> | <b>Ratio</b>        |
|------------------|-------------|---------------------|
| Colima           | 1974        | 1.12<br>(1.01–1.24) |
| Colima           | 1975        | 1.11<br>(1.0–1.23)  |
| Colima           | 1976        | 1.11<br>(1.0–1.23)  |
| Colima           | 1977        | 1.11<br>(1.0–1.23)  |
| Colima           | 1978        | 1.1<br>(1.0–1.23)   |
| Colima           | 1979        | 1.09<br>(0.99–1.21) |
| Colima           | 1980        | 1.07<br>(0.98–1.18) |
| Colima           | 1981        | 1.06<br>(0.97–1.16) |
| Colima           | 1982        | 1.04<br>(0.95–1.14) |
| Colima           | 1983        | 1.03<br>(0.95–1.12) |
| Colima           | 1984        | 1.04<br>(0.96–1.12) |
| Colima           | 1985        | 1.05<br>(0.97–1.14) |
| Colima           | 1986        | 1.06<br>(0.98–1.16) |
| Colima           | 1987        | 1.05<br>(0.96–1.14) |
| Colima           | 1988        | 1.03<br>(0.95–1.13) |
| Colima           | 1989        | 1.0<br>(0.92–1.08)  |
| Colima           | 1990        | 1.0<br>(0.92–1.08)  |
| Colima           | 1991        | 1.02<br>(0.93–1.12) |
| Colima           | 1992        | 1.03<br>(0.93–1.13) |
| Colima           | 1993        | 1.03<br>(0.93–1.15) |
| Colima           | 1994        | 1.03<br>(0.92–1.15) |
| Colima           | 1995        | 1.02<br>(0.91–1.14) |
| Colima           | 1996        | 1.02<br>(0.9–1.14)  |
| Colima           | 1997        | 1.02<br>(0.9–1.14)  |
| Colima           | 1998        | 1.03<br>(0.92–1.15) |
| Colima           | 1999        | 1.04<br>(0.93–1.15) |
| Colima           | 2000        | 1.05<br>(0.96–1.14) |
| Colima           | 2001        | 1.06<br>(0.98–1.14) |
| Colima           | 2002        | 1.07<br>(0.99–1.14) |
| Colima           | 2003        | 1.08<br>(1.0–1.16)  |
| Colima           | 2004        | 1.09<br>(1.0–1.19)  |

**Table 15 Ratio of adjusted to unadjusted 5q0 values for scaled locations by year**

| <b>Geography</b> | <b>Year</b> | <b>Ratio</b>        |
|------------------|-------------|---------------------|
| Colima           | 2005        | 1.11<br>(1.0–1.24)  |
| Colima           | 2006        | 1.13<br>(1.0–1.27)  |
| Colima           | 2007        | 1.15<br>(1.01–1.3)  |
| Colima           | 2008        | 1.17<br>(1.02–1.34) |
| Colima           | 2009        | 1.19<br>(1.03–1.37) |
| Colima           | 2010        | 1.2<br>(1.04–1.38)  |
| Colima           | 2011        | 1.2<br>(1.04–1.39)  |
| Colima           | 2012        | 1.18<br>(1.02–1.37) |
| Colima           | 2013        | 1.18<br>(1.0–1.37)  |
| Colima           | 2014        | 1.18<br>(1.01–1.37) |
| Colima           | 2015        | 1.2<br>(1.02–1.41)  |
| Colima           | 2016        | 1.18<br>(0.99–1.4)  |
| Colima           | 2017        | 1.19<br>(0.99–1.41) |
| Mexico City      | 1950        | 1.35<br>(1.08–1.64) |
| Mexico City      | 1951        | 1.36<br>(1.12–1.63) |
| Mexico City      | 1952        | 1.32<br>(1.09–1.56) |
| Mexico City      | 1953        | 1.29<br>(1.1–1.52)  |
| Mexico City      | 1954        | 1.26<br>(1.08–1.47) |
| Mexico City      | 1955        | 1.23<br>(1.07–1.43) |
| Mexico City      | 1956        | 1.2<br>(1.04–1.39)  |
| Mexico City      | 1957        | 1.19<br>(1.03–1.37) |
| Mexico City      | 1958        | 1.17<br>(1.01–1.36) |
| Mexico City      | 1959        | 1.15<br>(0.98–1.33) |
| Mexico City      | 1960        | 1.14<br>(0.98–1.31) |
| Mexico City      | 1961        | 1.13<br>(0.98–1.29) |
| Mexico City      | 1962        | 1.11<br>(0.96–1.26) |
| Mexico City      | 1963        | 1.1<br>(0.96–1.25)  |
| Mexico City      | 1964        | 1.09<br>(0.96–1.25) |
| Mexico City      | 1965        | 1.09<br>(0.96–1.24) |
| Mexico City      | 1966        | 1.1<br>(0.97–1.24)  |
| Mexico City      | 1967        | 1.1<br>(0.97–1.23)  |



**Table 15 Ratio of adjusted to unadjusted 5q0 values for scaled locations by year**

| <b>Geography</b> | <b>Year</b> | <b>Ratio</b>        |
|------------------|-------------|---------------------|
| Mexico City      | 1968        | 1.11<br>(0.98–1.25) |
| Mexico City      | 1969        | 1.11<br>(0.99–1.26) |
| Mexico City      | 1970        | 1.12<br>(0.99–1.26) |
| Mexico City      | 1971        | 1.12<br>(1.0–1.25)  |
| Mexico City      | 1972        | 1.12<br>(1.01–1.25) |
| Mexico City      | 1973        | 1.13<br>(1.02–1.25) |
| Mexico City      | 1974        | 1.12<br>(1.01–1.24) |
| Mexico City      | 1975        | 1.11<br>(1.0–1.24)  |
| Mexico City      | 1976        | 1.11<br>(1.0–1.23)  |
| Mexico City      | 1977        | 1.11<br>(1.0–1.24)  |
| Mexico City      | 1978        | 1.11<br>(1.0–1.23)  |
| Mexico City      | 1979        | 1.09<br>(0.99–1.21) |
| Mexico City      | 1980        | 1.07<br>(0.98–1.18) |
| Mexico City      | 1981        | 1.06<br>(0.97–1.16) |
| Mexico City      | 1982        | 1.04<br>(0.95–1.14) |
| Mexico City      | 1983        | 1.03<br>(0.95–1.12) |
| Mexico City      | 1984        | 1.04<br>(0.96–1.12) |
| Mexico City      | 1985        | 1.05<br>(0.97–1.14) |
| Mexico City      | 1986        | 1.06<br>(0.97–1.16) |
| Mexico City      | 1987        | 1.05<br>(0.96–1.14) |
| Mexico City      | 1988        | 1.03<br>(0.95–1.13) |
| Mexico City      | 1989        | 1.0<br>(0.92–1.08)  |
| Mexico City      | 1990        | 1.0<br>(0.92–1.08)  |
| Mexico City      | 1991        | 1.02<br>(0.93–1.12) |
| Mexico City      | 1992        | 1.03<br>(0.93–1.13) |
| Mexico City      | 1993        | 1.03<br>(0.93–1.16) |
| Mexico City      | 1994        | 1.03<br>(0.92–1.15) |
| Mexico City      | 1995        | 1.02<br>(0.91–1.14) |
| Mexico City      | 1996        | 1.02<br>(0.9–1.14)  |
| Mexico City      | 1997        | 1.02<br>(0.9–1.14)  |
| Mexico City      | 1998        | 1.03<br>(0.92–1.15) |

**Table 15 Ratio of adjusted to unadjusted 5q0 values for scaled locations by year**

| <b>Geography</b> | <b>Year</b> | <b>Ratio</b>        |
|------------------|-------------|---------------------|
| Mexico City      | 1999        | 1.04<br>(0.93–1.15) |
| Mexico City      | 2000        | 1.05<br>(0.96–1.14) |
| Mexico City      | 2001        | 1.06<br>(0.98–1.14) |
| Mexico City      | 2002        | 1.07<br>(0.99–1.14) |
| Mexico City      | 2003        | 1.08<br>(1.0–1.16)  |
| Mexico City      | 2004        | 1.09<br>(1.0–1.19)  |
| Mexico City      | 2005        | 1.11<br>(1.0–1.24)  |
| Mexico City      | 2006        | 1.13<br>(1.0–1.27)  |
| Mexico City      | 2007        | 1.15<br>(1.01–1.3)  |
| Mexico City      | 2008        | 1.17<br>(1.02–1.34) |
| Mexico City      | 2009        | 1.19<br>(1.03–1.37) |
| Mexico City      | 2010        | 1.2<br>(1.04–1.38)  |
| Mexico City      | 2011        | 1.2<br>(1.04–1.39)  |
| Mexico City      | 2012        | 1.18<br>(1.02–1.36) |
| Mexico City      | 2013        | 1.18<br>(1.0–1.37)  |
| Mexico City      | 2014        | 1.18<br>(1.01–1.37) |
| Mexico City      | 2015        | 1.2<br>(1.02–1.41)  |
| Mexico City      | 2016        | 1.18<br>(0.99–1.4)  |
| Mexico City      | 2017        | 1.19<br>(0.99–1.41) |
| Durango          | 1950        | 1.34<br>(1.08–1.61) |
| Durango          | 1951        | 1.34<br>(1.11–1.6)  |
| Durango          | 1952        | 1.3<br>(1.09–1.53)  |
| Durango          | 1953        | 1.28<br>(1.1–1.5)   |
| Durango          | 1954        | 1.25<br>(1.08–1.46) |
| Durango          | 1955        | 1.23<br>(1.06–1.42) |
| Durango          | 1956        | 1.2<br>(1.04–1.38)  |
| Durango          | 1957        | 1.18<br>(1.03–1.36) |
| Durango          | 1958        | 1.16<br>(1.01–1.35) |
| Durango          | 1959        | 1.14<br>(0.98–1.32) |
| Durango          | 1960        | 1.14<br>(0.98–1.3)  |
| Durango          | 1961        | 1.12<br>(0.98–1.28) |

**Table 15 Ratio of adjusted to unadjusted 5q0 values for scaled locations by year**

| <b>Geography</b> | <b>Year</b> | <b>Ratio</b>        |
|------------------|-------------|---------------------|
| Durango          | 1962        | 1.1<br>(0.96–1.25)  |
| Durango          | 1963        | 1.09<br>(0.96–1.24) |
| Durango          | 1964        | 1.09<br>(0.96–1.24) |
| Durango          | 1965        | 1.09<br>(0.96–1.24) |
| Durango          | 1966        | 1.1<br>(0.97–1.24)  |
| Durango          | 1967        | 1.1<br>(0.97–1.23)  |
| Durango          | 1968        | 1.1<br>(0.98–1.24)  |
| Durango          | 1969        | 1.11<br>(0.99–1.25) |
| Durango          | 1970        | 1.12<br>(0.99–1.25) |
| Durango          | 1971        | 1.12<br>(1.0–1.24)  |
| Durango          | 1972        | 1.12<br>(1.01–1.24) |
| Durango          | 1973        | 1.13<br>(1.02–1.24) |
| Durango          | 1974        | 1.12<br>(1.01–1.24) |
| Durango          | 1975        | 1.11<br>(1.0–1.23)  |
| Durango          | 1976        | 1.11<br>(1.0–1.23)  |
| Durango          | 1977        | 1.11<br>(1.0–1.23)  |
| Durango          | 1978        | 1.1<br>(1.0–1.23)   |
| Durango          | 1979        | 1.09<br>(0.99–1.21) |
| Durango          | 1980        | 1.07<br>(0.98–1.18) |
| Durango          | 1981        | 1.06<br>(0.97–1.16) |
| Durango          | 1982        | 1.04<br>(0.95–1.14) |
| Durango          | 1983        | 1.03<br>(0.95–1.12) |
| Durango          | 1984        | 1.04<br>(0.96–1.12) |
| Durango          | 1985        | 1.05<br>(0.97–1.14) |
| Durango          | 1986        | 1.06<br>(0.98–1.16) |
| Durango          | 1987        | 1.05<br>(0.96–1.14) |
| Durango          | 1988        | 1.03<br>(0.95–1.13) |
| Durango          | 1989        | 1.0<br>(0.92–1.08)  |
| Durango          | 1990        | 1.0<br>(0.92–1.08)  |
| Durango          | 1991        | 1.02<br>(0.93–1.12) |
| Durango          | 1992        | 1.03<br>(0.93–1.13) |

**Table 15 Ratio of adjusted to unadjusted 5q0 values for scaled locations by year**

| <b>Geography</b> | <b>Year</b> | <b>Ratio</b>        |
|------------------|-------------|---------------------|
| Durango          | 1993        | 1.03<br>(0.93–1.15) |
| Durango          | 1994        | 1.03<br>(0.92–1.15) |
| Durango          | 1995        | 1.02<br>(0.91–1.14) |
| Durango          | 1996        | 1.02<br>(0.9–1.14)  |
| Durango          | 1997        | 1.02<br>(0.9–1.14)  |
| Durango          | 1998        | 1.03<br>(0.92–1.15) |
| Durango          | 1999        | 1.04<br>(0.93–1.15) |
| Durango          | 2000        | 1.05<br>(0.96–1.14) |
| Durango          | 2001        | 1.06<br>(0.98–1.14) |
| Durango          | 2002        | 1.07<br>(0.99–1.14) |
| Durango          | 2003        | 1.08<br>(1.0–1.16)  |
| Durango          | 2004        | 1.09<br>(1.0–1.19)  |
| Durango          | 2005        | 1.11<br>(1.0–1.24)  |
| Durango          | 2006        | 1.13<br>(1.0–1.27)  |
| Durango          | 2007        | 1.15<br>(1.01–1.3)  |
| Durango          | 2008        | 1.17<br>(1.02–1.34) |
| Durango          | 2009        | 1.19<br>(1.03–1.37) |
| Durango          | 2010        | 1.2<br>(1.04–1.38)  |
| Durango          | 2011        | 1.2<br>(1.04–1.39)  |
| Durango          | 2012        | 1.18<br>(1.02–1.36) |
| Durango          | 2013        | 1.18<br>(1.0–1.37)  |
| Durango          | 2014        | 1.18<br>(1.01–1.37) |
| Durango          | 2015        | 1.2<br>(1.02–1.41)  |
| Durango          | 2016        | 1.18<br>(0.99–1.4)  |
| Durango          | 2017        | 1.19<br>(0.99–1.41) |
| Guanajuato       | 1950        | 1.33<br>(1.08–1.61) |
| Guanajuato       | 1951        | 1.34<br>(1.11–1.6)  |
| Guanajuato       | 1952        | 1.3<br>(1.09–1.53)  |
| Guanajuato       | 1953        | 1.28<br>(1.1–1.49)  |
| Guanajuato       | 1954        | 1.25<br>(1.08–1.45) |
| Guanajuato       | 1955        | 1.22<br>(1.06–1.41) |

**Table 15 Ratio of adjusted to unadjusted 5q0 values for scaled locations by year**

| <b>Geography</b> | <b>Year</b> | <b>Ratio</b>        |
|------------------|-------------|---------------------|
| Guanajuato       | 1956        | 1.19<br>(1.04–1.37) |
| Guanajuato       | 1957        | 1.18<br>(1.03–1.36) |
| Guanajuato       | 1958        | 1.16<br>(1.01–1.34) |
| Guanajuato       | 1959        | 1.14<br>(0.98–1.32) |
| Guanajuato       | 1960        | 1.14<br>(0.98–1.3)  |
| Guanajuato       | 1961        | 1.12<br>(0.98–1.28) |
| Guanajuato       | 1962        | 1.1<br>(0.96–1.25)  |
| Guanajuato       | 1963        | 1.09<br>(0.96–1.24) |
| Guanajuato       | 1964        | 1.09<br>(0.96–1.24) |
| Guanajuato       | 1965        | 1.09<br>(0.96–1.23) |
| Guanajuato       | 1966        | 1.1<br>(0.97–1.23)  |
| Guanajuato       | 1967        | 1.1<br>(0.97–1.22)  |
| Guanajuato       | 1968        | 1.1<br>(0.98–1.24)  |
| Guanajuato       | 1969        | 1.11<br>(0.99–1.25) |
| Guanajuato       | 1970        | 1.12<br>(0.99–1.25) |
| Guanajuato       | 1971        | 1.11<br>(1.0–1.24)  |
| Guanajuato       | 1972        | 1.12<br>(1.01–1.24) |
| Guanajuato       | 1973        | 1.13<br>(1.02–1.24) |
| Guanajuato       | 1974        | 1.11<br>(1.01–1.23) |
| Guanajuato       | 1975        | 1.11<br>(1.0–1.23)  |
| Guanajuato       | 1976        | 1.11<br>(1.0–1.23)  |
| Guanajuato       | 1977        | 1.11<br>(1.0–1.23)  |
| Guanajuato       | 1978        | 1.1<br>(1.0–1.23)   |
| Guanajuato       | 1979        | 1.09<br>(0.99–1.21) |
| Guanajuato       | 1980        | 1.07<br>(0.98–1.18) |
| Guanajuato       | 1981        | 1.06<br>(0.97–1.16) |
| Guanajuato       | 1982        | 1.04<br>(0.95–1.14) |
| Guanajuato       | 1983        | 1.03<br>(0.95–1.12) |
| Guanajuato       | 1984        | 1.04<br>(0.96–1.12) |
| Guanajuato       | 1985        | 1.05<br>(0.97–1.14) |
| Guanajuato       | 1986        | 1.06<br>(0.98–1.16) |

**Table 15 Ratio of adjusted to unadjusted 5q0 values for scaled locations by year**

| <b>Geography</b> | <b>Year</b> | <b>Ratio</b>        |
|------------------|-------------|---------------------|
| Guanajuato       | 1987        | 1.05<br>(0.96–1.14) |
| Guanajuato       | 1988        | 1.03<br>(0.95–1.13) |
| Guanajuato       | 1989        | 1.0<br>(0.92–1.08)  |
| Guanajuato       | 1990        | 1.0<br>(0.92–1.08)  |
| Guanajuato       | 1991        | 1.02<br>(0.93–1.12) |
| Guanajuato       | 1992        | 1.03<br>(0.93–1.13) |
| Guanajuato       | 1993        | 1.03<br>(0.93–1.15) |
| Guanajuato       | 1994        | 1.03<br>(0.92–1.15) |
| Guanajuato       | 1995        | 1.02<br>(0.91–1.14) |
| Guanajuato       | 1996        | 1.02<br>(0.9–1.14)  |
| Guanajuato       | 1997        | 1.02<br>(0.9–1.14)  |
| Guanajuato       | 1998        | 1.03<br>(0.92–1.15) |
| Guanajuato       | 1999        | 1.04<br>(0.93–1.15) |
| Guanajuato       | 2000        | 1.05<br>(0.96–1.14) |
| Guanajuato       | 2001        | 1.06<br>(0.98–1.14) |
| Guanajuato       | 2002        | 1.07<br>(0.99–1.14) |
| Guanajuato       | 2003        | 1.08<br>(1.0–1.16)  |
| Guanajuato       | 2004        | 1.09<br>(1.0–1.19)  |
| Guanajuato       | 2005        | 1.11<br>(1.0–1.24)  |
| Guanajuato       | 2006        | 1.13<br>(1.0–1.27)  |
| Guanajuato       | 2007        | 1.15<br>(1.01–1.3)  |
| Guanajuato       | 2008        | 1.17<br>(1.02–1.34) |
| Guanajuato       | 2009        | 1.19<br>(1.03–1.37) |
| Guanajuato       | 2010        | 1.2<br>(1.04–1.38)  |
| Guanajuato       | 2011        | 1.2<br>(1.04–1.39)  |
| Guanajuato       | 2012        | 1.18<br>(1.02–1.37) |
| Guanajuato       | 2013        | 1.18<br>(1.0–1.37)  |
| Guanajuato       | 2014        | 1.18<br>(1.01–1.37) |
| Guanajuato       | 2015        | 1.2<br>(1.02–1.41)  |
| Guanajuato       | 2016        | 1.18<br>(0.99–1.4)  |
| Guanajuato       | 2017        | 1.19<br>(0.99–1.41) |

**Table 15 Ratio of adjusted to unadjusted 5q0 values for scaled locations by year**

| <b>Geography</b> | <b>Year</b> | <b>Ratio</b>        |
|------------------|-------------|---------------------|
| Guerrero         | 1950        | 1.33<br>(1.08–1.6)  |
| Guerrero         | 1951        | 1.33<br>(1.11–1.59) |
| Guerrero         | 1952        | 1.3<br>(1.09–1.52)  |
| Guerrero         | 1953        | 1.27<br>(1.1–1.49)  |
| Guerrero         | 1954        | 1.24<br>(1.08–1.45) |
| Guerrero         | 1955        | 1.22<br>(1.06–1.4)  |
| Guerrero         | 1956        | 1.19<br>(1.04–1.37) |
| Guerrero         | 1957        | 1.18<br>(1.03–1.35) |
| Guerrero         | 1958        | 1.16<br>(1.01–1.34) |
| Guerrero         | 1959        | 1.14<br>(0.98–1.31) |
| Guerrero         | 1960        | 1.13<br>(0.98–1.29) |
| Guerrero         | 1961        | 1.12<br>(0.98–1.27) |
| Guerrero         | 1962        | 1.1<br>(0.97–1.25)  |
| Guerrero         | 1963        | 1.09<br>(0.96–1.24) |
| Guerrero         | 1964        | 1.09<br>(0.96–1.24) |
| Guerrero         | 1965        | 1.09<br>(0.96–1.23) |
| Guerrero         | 1966        | 1.09<br>(0.97–1.23) |
| Guerrero         | 1967        | 1.1<br>(0.97–1.22)  |
| Guerrero         | 1968        | 1.1<br>(0.98–1.23)  |
| Guerrero         | 1969        | 1.11<br>(0.99–1.25) |
| Guerrero         | 1970        | 1.11<br>(0.99–1.25) |
| Guerrero         | 1971        | 1.11<br>(1.0–1.24)  |
| Guerrero         | 1972        | 1.12<br>(1.01–1.24) |
| Guerrero         | 1973        | 1.13<br>(1.02–1.24) |
| Guerrero         | 1974        | 1.11<br>(1.01–1.23) |
| Guerrero         | 1975        | 1.11<br>(1.0–1.23)  |
| Guerrero         | 1976        | 1.11<br>(1.0–1.22)  |
| Guerrero         | 1977        | 1.11<br>(1.0–1.23)  |
| Guerrero         | 1978        | 1.1<br>(1.0–1.22)   |
| Guerrero         | 1979        | 1.09<br>(0.99–1.21) |
| Guerrero         | 1980        | 1.07<br>(0.98–1.17) |

**Table 15 Ratio of adjusted to unadjusted 5q0 values for scaled locations by year**

| <b>Geography</b> | <b>Year</b> | <b>Ratio</b>        |
|------------------|-------------|---------------------|
| Guerrero         | 1981        | 1.06<br>(0.97–1.16) |
| Guerrero         | 1982        | 1.04<br>(0.95–1.13) |
| Guerrero         | 1983        | 1.03<br>(0.95–1.11) |
| Guerrero         | 1984        | 1.04<br>(0.96–1.11) |
| Guerrero         | 1985        | 1.05<br>(0.97–1.14) |
| Guerrero         | 1986        | 1.06<br>(0.98–1.16) |
| Guerrero         | 1987        | 1.05<br>(0.96–1.14) |
| Guerrero         | 1988        | 1.03<br>(0.95–1.12) |
| Guerrero         | 1989        | 1.0<br>(0.92–1.08)  |
| Guerrero         | 1990        | 1.0<br>(0.92–1.08)  |
| Guerrero         | 1991        | 1.02<br>(0.93–1.12) |
| Guerrero         | 1992        | 1.03<br>(0.93–1.13) |
| Guerrero         | 1993        | 1.03<br>(0.93–1.15) |
| Guerrero         | 1994        | 1.03<br>(0.92–1.15) |
| Guerrero         | 1995        | 1.02<br>(0.91–1.14) |
| Guerrero         | 1996        | 1.02<br>(0.9–1.14)  |
| Guerrero         | 1997        | 1.02<br>(0.9–1.14)  |
| Guerrero         | 1998        | 1.03<br>(0.92–1.15) |
| Guerrero         | 1999        | 1.04<br>(0.93–1.14) |
| Guerrero         | 2000        | 1.05<br>(0.96–1.14) |
| Guerrero         | 2001        | 1.06<br>(0.98–1.14) |
| Guerrero         | 2002        | 1.07<br>(0.99–1.14) |
| Guerrero         | 2003        | 1.08<br>(1.0–1.16)  |
| Guerrero         | 2004        | 1.09<br>(1.0–1.19)  |
| Guerrero         | 2005        | 1.11<br>(1.0–1.23)  |
| Guerrero         | 2006        | 1.13<br>(1.0–1.27)  |
| Guerrero         | 2007        | 1.15<br>(1.01–1.3)  |
| Guerrero         | 2008        | 1.17<br>(1.02–1.33) |
| Guerrero         | 2009        | 1.19<br>(1.03–1.37) |
| Guerrero         | 2010        | 1.2<br>(1.04–1.38)  |
| Guerrero         | 2011        | 1.2<br>(1.04–1.39)  |



**Table 15 Ratio of adjusted to unadjusted 5q0 values for scaled locations by year**

| <b>Geography</b> | <b>Year</b> | <b>Ratio</b>        |
|------------------|-------------|---------------------|
| Guerrero         | 2012        | 1.18<br>(1.02–1.36) |
| Guerrero         | 2013        | 1.17<br>(1.0–1.36)  |
| Guerrero         | 2014        | 1.18<br>(1.01–1.37) |
| Guerrero         | 2015        | 1.2<br>(1.02–1.4)   |
| Guerrero         | 2016        | 1.18<br>(0.99–1.4)  |
| Guerrero         | 2017        | 1.19<br>(0.99–1.41) |
| Hidalgo          | 1950        | 1.34<br>(1.08–1.63) |
| Hidalgo          | 1951        | 1.35<br>(1.11–1.62) |
| Hidalgo          | 1952        | 1.31<br>(1.09–1.54) |
| Hidalgo          | 1953        | 1.28<br>(1.1–1.5)   |
| Hidalgo          | 1954        | 1.25<br>(1.08–1.46) |
| Hidalgo          | 1955        | 1.23<br>(1.06–1.42) |
| Hidalgo          | 1956        | 1.2<br>(1.04–1.38)  |
| Hidalgo          | 1957        | 1.18<br>(1.03–1.37) |
| Hidalgo          | 1958        | 1.17<br>(1.01–1.35) |
| Hidalgo          | 1959        | 1.14<br>(0.98–1.33) |
| Hidalgo          | 1960        | 1.14<br>(0.98–1.31) |
| Hidalgo          | 1961        | 1.13<br>(0.98–1.28) |
| Hidalgo          | 1962        | 1.1<br>(0.96–1.26)  |
| Hidalgo          | 1963        | 1.09<br>(0.96–1.24) |
| Hidalgo          | 1964        | 1.09<br>(0.96–1.25) |
| Hidalgo          | 1965        | 1.09<br>(0.96–1.24) |
| Hidalgo          | 1966        | 1.1<br>(0.97–1.24)  |
| Hidalgo          | 1967        | 1.1<br>(0.97–1.23)  |
| Hidalgo          | 1968        | 1.1<br>(0.98–1.24)  |
| Hidalgo          | 1969        | 1.11<br>(0.99–1.25) |
| Hidalgo          | 1970        | 1.12<br>(0.99–1.25) |
| Hidalgo          | 1971        | 1.12<br>(1.0–1.24)  |
| Hidalgo          | 1972        | 1.12<br>(1.01–1.24) |
| Hidalgo          | 1973        | 1.13<br>(1.02–1.24) |
| Hidalgo          | 1974        | 1.12<br>(1.01–1.24) |

**Table 15 Ratio of adjusted to unadjusted 5q0 values for scaled locations by year**

| <b>Geography</b> | <b>Year</b> | <b>Ratio</b>        |
|------------------|-------------|---------------------|
| Hidalgo          | 1975        | 1.11<br>(1.0–1.23)  |
| Hidalgo          | 1976        | 1.11<br>(1.0–1.23)  |
| Hidalgo          | 1977        | 1.11<br>(1.0–1.23)  |
| Hidalgo          | 1978        | 1.1<br>(1.0–1.23)   |
| Hidalgo          | 1979        | 1.09<br>(0.99–1.21) |
| Hidalgo          | 1980        | 1.07<br>(0.98–1.18) |
| Hidalgo          | 1981        | 1.06<br>(0.97–1.16) |
| Hidalgo          | 1982        | 1.04<br>(0.95–1.14) |
| Hidalgo          | 1983        | 1.03<br>(0.95–1.12) |
| Hidalgo          | 1984        | 1.04<br>(0.96–1.12) |
| Hidalgo          | 1985        | 1.05<br>(0.97–1.14) |
| Hidalgo          | 1986        | 1.06<br>(0.98–1.16) |
| Hidalgo          | 1987        | 1.05<br>(0.96–1.14) |
| Hidalgo          | 1988        | 1.03<br>(0.95–1.13) |
| Hidalgo          | 1989        | 1.0<br>(0.92–1.08)  |
| Hidalgo          | 1990        | 1.0<br>(0.92–1.08)  |
| Hidalgo          | 1991        | 1.02<br>(0.93–1.12) |
| Hidalgo          | 1992        | 1.03<br>(0.93–1.13) |
| Hidalgo          | 1993        | 1.03<br>(0.93–1.15) |
| Hidalgo          | 1994        | 1.03<br>(0.92–1.15) |
| Hidalgo          | 1995        | 1.02<br>(0.91–1.14) |
| Hidalgo          | 1996        | 1.02<br>(0.9–1.14)  |
| Hidalgo          | 1997        | 1.02<br>(0.9–1.14)  |
| Hidalgo          | 1998        | 1.03<br>(0.92–1.15) |
| Hidalgo          | 1999        | 1.04<br>(0.93–1.15) |
| Hidalgo          | 2000        | 1.05<br>(0.96–1.14) |
| Hidalgo          | 2001        | 1.06<br>(0.98–1.14) |
| Hidalgo          | 2002        | 1.07<br>(0.99–1.14) |
| Hidalgo          | 2003        | 1.08<br>(1.0–1.16)  |
| Hidalgo          | 2004        | 1.09<br>(1.0–1.19)  |
| Hidalgo          | 2005        | 1.11<br>(1.0–1.24)  |

**Table 15 Ratio of adjusted to unadjusted 5q0 values for scaled locations by year**

| <b>Geography</b> | <b>Year</b> | <b>Ratio</b>        |
|------------------|-------------|---------------------|
| Hidalgo          | 2006        | 1.13<br>(1.0–1.27)  |
| Hidalgo          | 2007        | 1.15<br>(1.01–1.3)  |
| Hidalgo          | 2008        | 1.17<br>(1.02–1.34) |
| Hidalgo          | 2009        | 1.19<br>(1.03–1.37) |
| Hidalgo          | 2010        | 1.2<br>(1.04–1.39)  |
| Hidalgo          | 2011        | 1.2<br>(1.04–1.4)   |
| Hidalgo          | 2012        | 1.18<br>(1.02–1.37) |
| Hidalgo          | 2013        | 1.18<br>(1.0–1.37)  |
| Hidalgo          | 2014        | 1.18<br>(1.01–1.37) |
| Hidalgo          | 2015        | 1.2<br>(1.02–1.41)  |
| Hidalgo          | 2016        | 1.18<br>(0.99–1.4)  |
| Hidalgo          | 2017        | 1.19<br>(0.99–1.41) |
| Jalisco          | 1950        | 1.34<br>(1.08–1.62) |
| Jalisco          | 1951        | 1.35<br>(1.11–1.61) |
| Jalisco          | 1952        | 1.31<br>(1.09–1.54) |
| Jalisco          | 1953        | 1.28<br>(1.1–1.5)   |
| Jalisco          | 1954        | 1.25<br>(1.08–1.46) |
| Jalisco          | 1955        | 1.23<br>(1.06–1.42) |
| Jalisco          | 1956        | 1.2<br>(1.04–1.38)  |
| Jalisco          | 1957        | 1.18<br>(1.03–1.37) |
| Jalisco          | 1958        | 1.16<br>(1.01–1.35) |
| Jalisco          | 1959        | 1.14<br>(0.98–1.32) |
| Jalisco          | 1960        | 1.14<br>(0.98–1.31) |
| Jalisco          | 1961        | 1.12<br>(0.98–1.28) |
| Jalisco          | 1962        | 1.1<br>(0.96–1.26)  |
| Jalisco          | 1963        | 1.09<br>(0.96–1.24) |
| Jalisco          | 1964        | 1.09<br>(0.96–1.24) |
| Jalisco          | 1965        | 1.09<br>(0.96–1.24) |
| Jalisco          | 1966        | 1.1<br>(0.97–1.24)  |
| Jalisco          | 1967        | 1.1<br>(0.97–1.23)  |
| Jalisco          | 1968        | 1.1<br>(0.98–1.24)  |

**Table 15 Ratio of adjusted to unadjusted 5q0 values for scaled locations by year**

| <b>Geography</b> | <b>Year</b> | <b>Ratio</b>        |
|------------------|-------------|---------------------|
| Jalisco          | 1969        | 1.11<br>(0.99–1.25) |
| Jalisco          | 1970        | 1.12<br>(0.99–1.25) |
| Jalisco          | 1971        | 1.12<br>(1.0–1.24)  |
| Jalisco          | 1972        | 1.12<br>(1.01–1.24) |
| Jalisco          | 1973        | 1.13<br>(1.02–1.25) |
| Jalisco          | 1974        | 1.12<br>(1.01–1.24) |
| Jalisco          | 1975        | 1.11<br>(1.0–1.23)  |
| Jalisco          | 1976        | 1.11<br>(1.0–1.23)  |
| Jalisco          | 1977        | 1.11<br>(1.0–1.24)  |
| Jalisco          | 1978        | 1.1<br>(1.0–1.23)   |
| Jalisco          | 1979        | 1.09<br>(0.99–1.21) |
| Jalisco          | 1980        | 1.07<br>(0.98–1.18) |
| Jalisco          | 1981        | 1.06<br>(0.97–1.16) |
| Jalisco          | 1982        | 1.04<br>(0.95–1.14) |
| Jalisco          | 1983        | 1.03<br>(0.95–1.12) |
| Jalisco          | 1984        | 1.04<br>(0.96–1.12) |
| Jalisco          | 1985        | 1.05<br>(0.97–1.14) |
| Jalisco          | 1986        | 1.06<br>(0.98–1.16) |
| Jalisco          | 1987        | 1.05<br>(0.96–1.14) |
| Jalisco          | 1988        | 1.03<br>(0.95–1.13) |
| Jalisco          | 1989        | 1.0<br>(0.92–1.08)  |
| Jalisco          | 1990        | 1.0<br>(0.92–1.08)  |
| Jalisco          | 1991        | 1.02<br>(0.93–1.12) |
| Jalisco          | 1992        | 1.03<br>(0.93–1.13) |
| Jalisco          | 1993        | 1.03<br>(0.93–1.15) |
| Jalisco          | 1994        | 1.03<br>(0.92–1.15) |
| Jalisco          | 1995        | 1.02<br>(0.91–1.14) |
| Jalisco          | 1996        | 1.02<br>(0.9–1.14)  |
| Jalisco          | 1997        | 1.02<br>(0.9–1.14)  |
| Jalisco          | 1998        | 1.03<br>(0.92–1.15) |
| Jalisco          | 1999        | 1.04<br>(0.93–1.15) |

**Table 15 Ratio of adjusted to unadjusted 5q0 values for scaled locations by year**

| <b>Geography</b> | <b>Year</b> | <b>Ratio</b>        |
|------------------|-------------|---------------------|
| Jalisco          | 2000        | 1.05<br>(0.96–1.14) |
| Jalisco          | 2001        | 1.06<br>(0.98–1.14) |
| Jalisco          | 2002        | 1.07<br>(0.99–1.14) |
| Jalisco          | 2003        | 1.08<br>(1.0–1.16)  |
| Jalisco          | 2004        | 1.09<br>(1.0–1.19)  |
| Jalisco          | 2005        | 1.11<br>(1.0–1.24)  |
| Jalisco          | 2006        | 1.13<br>(1.0–1.27)  |
| Jalisco          | 2007        | 1.15<br>(1.01–1.3)  |
| Jalisco          | 2008        | 1.17<br>(1.02–1.34) |
| Jalisco          | 2009        | 1.19<br>(1.03–1.37) |
| Jalisco          | 2010        | 1.2<br>(1.04–1.38)  |
| Jalisco          | 2011        | 1.2<br>(1.04–1.39)  |
| Jalisco          | 2012        | 1.18<br>(1.02–1.37) |
| Jalisco          | 2013        | 1.18<br>(1.0–1.37)  |
| Jalisco          | 2014        | 1.18<br>(1.01–1.37) |
| Jalisco          | 2015        | 1.2<br>(1.02–1.41)  |
| Jalisco          | 2016        | 1.18<br>(0.99–1.4)  |
| Jalisco          | 2017        | 1.19<br>(0.99–1.41) |
| México           | 1950        | 1.35<br>(1.08–1.64) |
| México           | 1951        | 1.35<br>(1.11–1.62) |
| México           | 1952        | 1.31<br>(1.09–1.55) |
| México           | 1953        | 1.29<br>(1.1–1.51)  |
| México           | 1954        | 1.25<br>(1.08–1.47) |
| México           | 1955        | 1.23<br>(1.07–1.42) |
| México           | 1956        | 1.2<br>(1.04–1.38)  |
| México           | 1957        | 1.19<br>(1.03–1.37) |
| México           | 1958        | 1.17<br>(1.01–1.35) |
| México           | 1959        | 1.14<br>(0.98–1.33) |
| México           | 1960        | 1.14<br>(0.98–1.31) |
| México           | 1961        | 1.13<br>(0.98–1.29) |
| México           | 1962        | 1.1<br>(0.96–1.26)  |

**Table 15 Ratio of adjusted to unadjusted 5q0 values for scaled locations by year**

| <b>Geography</b> | <b>Year</b> | <b>Ratio</b>        |
|------------------|-------------|---------------------|
| México           | 1963        | 1.09<br>(0.96–1.24) |
| México           | 1964        | 1.09<br>(0.96–1.25) |
| México           | 1965        | 1.09<br>(0.96–1.24) |
| México           | 1966        | 1.1<br>(0.97–1.24)  |
| México           | 1967        | 1.1<br>(0.97–1.23)  |
| México           | 1968        | 1.1<br>(0.98–1.24)  |
| México           | 1969        | 1.11<br>(0.99–1.26) |
| México           | 1970        | 1.12<br>(0.99–1.25) |
| México           | 1971        | 1.12<br>(1.0–1.25)  |
| México           | 1972        | 1.12<br>(1.01–1.24) |
| México           | 1973        | 1.13<br>(1.02–1.25) |
| México           | 1974        | 1.12<br>(1.01–1.24) |
| México           | 1975        | 1.11<br>(1.0–1.23)  |
| México           | 1976        | 1.11<br>(1.0–1.23)  |
| México           | 1977        | 1.11<br>(1.0–1.23)  |
| México           | 1978        | 1.1<br>(1.0–1.23)   |
| México           | 1979        | 1.09<br>(0.99–1.21) |
| México           | 1980        | 1.07<br>(0.98–1.18) |
| México           | 1981        | 1.06<br>(0.97–1.16) |
| México           | 1982        | 1.04<br>(0.95–1.14) |
| México           | 1983        | 1.03<br>(0.95–1.12) |
| México           | 1984        | 1.04<br>(0.96–1.12) |
| México           | 1985        | 1.05<br>(0.97–1.14) |
| México           | 1986        | 1.06<br>(0.98–1.16) |
| México           | 1987        | 1.05<br>(0.96–1.14) |
| México           | 1988        | 1.03<br>(0.95–1.13) |
| México           | 1989        | 1.0<br>(0.92–1.08)  |
| México           | 1990        | 1.0<br>(0.92–1.08)  |
| México           | 1991        | 1.02<br>(0.93–1.12) |
| México           | 1992        | 1.03<br>(0.93–1.13) |
| México           | 1993        | 1.03<br>(0.93–1.15) |

**Table 15 Ratio of adjusted to unadjusted 5q0 values for scaled locations by year**

| <b>Geography</b>    | <b>Year</b> | <b>Ratio</b>        |
|---------------------|-------------|---------------------|
| México              | 1994        | 1.03<br>(0.92–1.15) |
| México              | 1995        | 1.02<br>(0.91–1.14) |
| México              | 1996        | 1.02<br>(0.9–1.14)  |
| México              | 1997        | 1.02<br>(0.9–1.14)  |
| México              | 1998        | 1.03<br>(0.92–1.15) |
| México              | 1999        | 1.04<br>(0.93–1.15) |
| México              | 2000        | 1.05<br>(0.96–1.14) |
| México              | 2001        | 1.06<br>(0.98–1.14) |
| México              | 2002        | 1.07<br>(0.99–1.14) |
| México              | 2003        | 1.08<br>(1.0–1.16)  |
| México              | 2004        | 1.09<br>(1.0–1.19)  |
| México              | 2005        | 1.11<br>(1.0–1.24)  |
| México              | 2006        | 1.13<br>(1.0–1.27)  |
| México              | 2007        | 1.15<br>(1.01–1.3)  |
| México              | 2008        | 1.17<br>(1.02–1.34) |
| México              | 2009        | 1.19<br>(1.03–1.37) |
| México              | 2010        | 1.2<br>(1.04–1.38)  |
| México              | 2011        | 1.2<br>(1.04–1.39)  |
| México              | 2012        | 1.18<br>(1.02–1.36) |
| México              | 2013        | 1.18<br>(1.0–1.37)  |
| México              | 2014        | 1.18<br>(1.01–1.37) |
| México              | 2015        | 1.2<br>(1.02–1.41)  |
| México              | 2016        | 1.18<br>(0.99–1.4)  |
| México              | 2017        | 1.19<br>(0.99–1.41) |
| Michoacán de Ocampo | 1950        | 1.33<br>(1.08–1.61) |
| Michoacán de Ocampo | 1951        | 1.34<br>(1.11–1.6)  |
| Michoacán de Ocampo | 1952        | 1.3<br>(1.09–1.53)  |
| Michoacán de Ocampo | 1953        | 1.28<br>(1.1–1.49)  |
| Michoacán de Ocampo | 1954        | 1.25<br>(1.08–1.45) |
| Michoacán de Ocampo | 1955        | 1.22<br>(1.06–1.41) |
| Michoacán de Ocampo | 1956        | 1.2<br>(1.04–1.37)  |

**Table 15 Ratio of adjusted to unadjusted 5q0 values for scaled locations by year**

| <b>Geography</b>    | <b>Year</b> | <b>Ratio</b>        |
|---------------------|-------------|---------------------|
| Michoacán de Ocampo | 1957        | 1.18<br>(1.03–1.36) |
| Michoacán de Ocampo | 1958        | 1.16<br>(1.01–1.34) |
| Michoacán de Ocampo | 1959        | 1.14<br>(0.98–1.32) |
| Michoacán de Ocampo | 1960        | 1.14<br>(0.98–1.3)  |
| Michoacán de Ocampo | 1961        | 1.12<br>(0.98–1.28) |
| Michoacán de Ocampo | 1962        | 1.1<br>(0.96–1.25)  |
| Michoacán de Ocampo | 1963        | 1.09<br>(0.96–1.24) |
| Michoacán de Ocampo | 1964        | 1.09<br>(0.96–1.24) |
| Michoacán de Ocampo | 1965        | 1.09<br>(0.96–1.23) |
| Michoacán de Ocampo | 1966        | 1.1<br>(0.97–1.24)  |
| Michoacán de Ocampo | 1967        | 1.1<br>(0.97–1.23)  |
| Michoacán de Ocampo | 1968        | 1.1<br>(0.98–1.24)  |
| Michoacán de Ocampo | 1969        | 1.11<br>(0.99–1.25) |
| Michoacán de Ocampo | 1970        | 1.12<br>(0.99–1.25) |
| Michoacán de Ocampo | 1971        | 1.12<br>(1.0–1.24)  |
| Michoacán de Ocampo | 1972        | 1.12<br>(1.01–1.24) |
| Michoacán de Ocampo | 1973        | 1.13<br>(1.02–1.24) |
| Michoacán de Ocampo | 1974        | 1.12<br>(1.01–1.24) |
| Michoacán de Ocampo | 1975        | 1.11<br>(1.0–1.23)  |
| Michoacán de Ocampo | 1976        | 1.11<br>(1.0–1.23)  |
| Michoacán de Ocampo | 1977        | 1.11<br>(1.0–1.23)  |
| Michoacán de Ocampo | 1978        | 1.1<br>(1.0–1.23)   |
| Michoacán de Ocampo | 1979        | 1.09<br>(0.99–1.21) |
| Michoacán de Ocampo | 1980        | 1.07<br>(0.98–1.18) |
| Michoacán de Ocampo | 1981        | 1.06<br>(0.97–1.16) |
| Michoacán de Ocampo | 1982        | 1.04<br>(0.95–1.14) |
| Michoacán de Ocampo | 1983        | 1.03<br>(0.95–1.12) |
| Michoacán de Ocampo | 1984        | 1.04<br>(0.96–1.12) |
| Michoacán de Ocampo | 1985        | 1.05<br>(0.97–1.14) |
| Michoacán de Ocampo | 1986        | 1.06<br>(0.98–1.16) |
| Michoacán de Ocampo | 1987        | 1.05<br>(0.96–1.14) |



**Table 15 Ratio of adjusted to unadjusted 5q0 values for scaled locations by year**

| <b>Geography</b>    | <b>Year</b> | <b>Ratio</b>        |
|---------------------|-------------|---------------------|
| Michoacán de Ocampo | 1988        | 1.03<br>(0.95–1.13) |
| Michoacán de Ocampo | 1989        | 1.0<br>(0.92–1.08)  |
| Michoacán de Ocampo | 1990        | 1.0<br>(0.92–1.08)  |
| Michoacán de Ocampo | 1991        | 1.02<br>(0.93–1.12) |
| Michoacán de Ocampo | 1992        | 1.03<br>(0.93–1.13) |
| Michoacán de Ocampo | 1993        | 1.03<br>(0.93–1.15) |
| Michoacán de Ocampo | 1994        | 1.03<br>(0.92–1.15) |
| Michoacán de Ocampo | 1995        | 1.02<br>(0.91–1.14) |
| Michoacán de Ocampo | 1996        | 1.02<br>(0.9–1.14)  |
| Michoacán de Ocampo | 1997        | 1.02<br>(0.9–1.14)  |
| Michoacán de Ocampo | 1998        | 1.03<br>(0.92–1.15) |
| Michoacán de Ocampo | 1999        | 1.04<br>(0.93–1.15) |
| Michoacán de Ocampo | 2000        | 1.05<br>(0.96–1.14) |
| Michoacán de Ocampo | 2001        | 1.06<br>(0.98–1.14) |
| Michoacán de Ocampo | 2002        | 1.07<br>(0.99–1.14) |
| Michoacán de Ocampo | 2003        | 1.08<br>(1.0–1.16)  |
| Michoacán de Ocampo | 2004        | 1.09<br>(1.0–1.19)  |
| Michoacán de Ocampo | 2005        | 1.11<br>(1.0–1.24)  |
| Michoacán de Ocampo | 2006        | 1.13<br>(1.0–1.27)  |
| Michoacán de Ocampo | 2007        | 1.15<br>(1.01–1.3)  |
| Michoacán de Ocampo | 2008        | 1.17<br>(1.02–1.34) |
| Michoacán de Ocampo | 2009        | 1.19<br>(1.03–1.37) |
| Michoacán de Ocampo | 2010        | 1.2<br>(1.04–1.38)  |
| Michoacán de Ocampo | 2011        | 1.2<br>(1.04–1.39)  |
| Michoacán de Ocampo | 2012        | 1.18<br>(1.02–1.36) |
| Michoacán de Ocampo | 2013        | 1.18<br>(1.0–1.37)  |
| Michoacán de Ocampo | 2014        | 1.18<br>(1.01–1.37) |
| Michoacán de Ocampo | 2015        | 1.2<br>(1.02–1.41)  |
| Michoacán de Ocampo | 2016        | 1.18<br>(0.99–1.4)  |
| Michoacán de Ocampo | 2017        | 1.19<br>(0.99–1.41) |
| Morelos             | 1950        | 1.34<br>(1.08–1.62) |

**Table 15 Ratio of adjusted to unadjusted 5q0 values for scaled locations by year**

| <b>Geography</b> | <b>Year</b> | <b>Ratio</b>        |
|------------------|-------------|---------------------|
| Morelos          | 1951        | 1.35<br>(1.11–1.61) |
| Morelos          | 1952        | 1.31<br>(1.09–1.54) |
| Morelos          | 1953        | 1.28<br>(1.1–1.5)   |
| Morelos          | 1954        | 1.25<br>(1.08–1.46) |
| Morelos          | 1955        | 1.23<br>(1.06–1.42) |
| Morelos          | 1956        | 1.2<br>(1.04–1.38)  |
| Morelos          | 1957        | 1.18<br>(1.03–1.37) |
| Morelos          | 1958        | 1.16<br>(1.01–1.35) |
| Morelos          | 1959        | 1.14<br>(0.98–1.32) |
| Morelos          | 1960        | 1.14<br>(0.98–1.31) |
| Morelos          | 1961        | 1.12<br>(0.98–1.28) |
| Morelos          | 1962        | 1.1<br>(0.96–1.26)  |
| Morelos          | 1963        | 1.09<br>(0.96–1.24) |
| Morelos          | 1964        | 1.09<br>(0.96–1.24) |
| Morelos          | 1965        | 1.09<br>(0.96–1.24) |
| Morelos          | 1966        | 1.1<br>(0.97–1.24)  |
| Morelos          | 1967        | 1.1<br>(0.97–1.23)  |
| Morelos          | 1968        | 1.1<br>(0.98–1.24)  |
| Morelos          | 1969        | 1.11<br>(0.99–1.25) |
| Morelos          | 1970        | 1.12<br>(0.99–1.25) |
| Morelos          | 1971        | 1.12<br>(1.0–1.24)  |
| Morelos          | 1972        | 1.12<br>(1.01–1.24) |
| Morelos          | 1973        | 1.13<br>(1.02–1.24) |
| Morelos          | 1974        | 1.12<br>(1.01–1.24) |
| Morelos          | 1975        | 1.11<br>(1.0–1.23)  |
| Morelos          | 1976        | 1.11<br>(1.0–1.23)  |
| Morelos          | 1977        | 1.11<br>(1.0–1.23)  |
| Morelos          | 1978        | 1.1<br>(1.0–1.23)   |
| Morelos          | 1979        | 1.09<br>(0.99–1.21) |
| Morelos          | 1980        | 1.07<br>(0.98–1.18) |
| Morelos          | 1981        | 1.06<br>(0.97–1.16) |

**Table 15 Ratio of adjusted to unadjusted 5q0 values for scaled locations by year**

| <b>Geography</b> | <b>Year</b> | <b>Ratio</b>        |
|------------------|-------------|---------------------|
| Morelos          | 1982        | 1.04<br>(0.95–1.14) |
| Morelos          | 1983        | 1.03<br>(0.95–1.12) |
| Morelos          | 1984        | 1.04<br>(0.96–1.12) |
| Morelos          | 1985        | 1.05<br>(0.97–1.14) |
| Morelos          | 1986        | 1.06<br>(0.98–1.16) |
| Morelos          | 1987        | 1.05<br>(0.96–1.14) |
| Morelos          | 1988        | 1.03<br>(0.95–1.13) |
| Morelos          | 1989        | 1.0<br>(0.92–1.08)  |
| Morelos          | 1990        | 1.0<br>(0.92–1.08)  |
| Morelos          | 1991        | 1.02<br>(0.93–1.12) |
| Morelos          | 1992        | 1.03<br>(0.93–1.13) |
| Morelos          | 1993        | 1.03<br>(0.93–1.15) |
| Morelos          | 1994        | 1.03<br>(0.92–1.15) |
| Morelos          | 1995        | 1.02<br>(0.91–1.14) |
| Morelos          | 1996        | 1.02<br>(0.9–1.14)  |
| Morelos          | 1997        | 1.02<br>(0.9–1.14)  |
| Morelos          | 1998        | 1.03<br>(0.92–1.15) |
| Morelos          | 1999        | 1.04<br>(0.93–1.15) |
| Morelos          | 2000        | 1.05<br>(0.96–1.14) |
| Morelos          | 2001        | 1.06<br>(0.98–1.14) |
| Morelos          | 2002        | 1.07<br>(0.99–1.14) |
| Morelos          | 2003        | 1.08<br>(1.0–1.16)  |
| Morelos          | 2004        | 1.09<br>(1.0–1.19)  |
| Morelos          | 2005        | 1.11<br>(1.0–1.24)  |
| Morelos          | 2006        | 1.13<br>(1.0–1.27)  |
| Morelos          | 2007        | 1.15<br>(1.01–1.3)  |
| Morelos          | 2008        | 1.17<br>(1.02–1.34) |
| Morelos          | 2009        | 1.19<br>(1.03–1.37) |
| Morelos          | 2010        | 1.2<br>(1.04–1.38)  |
| Morelos          | 2011        | 1.2<br>(1.04–1.39)  |
| Morelos          | 2012        | 1.18<br>(1.02–1.37) |

**Table 15 Ratio of adjusted to unadjusted 5q0 values for scaled locations by year**

| <b>Geography</b> | <b>Year</b> | <b>Ratio</b>        |
|------------------|-------------|---------------------|
| Morelos          | 2013        | 1.18<br>(1.0–1.37)  |
| Morelos          | 2014        | 1.18<br>(1.01–1.37) |
| Morelos          | 2015        | 1.2<br>(1.02–1.41)  |
| Morelos          | 2016        | 1.18<br>(0.99–1.4)  |
| Morelos          | 2017        | 1.19<br>(0.99–1.41) |
| Nayarit          | 1950        | 1.34<br>(1.08–1.61) |
| Nayarit          | 1951        | 1.34<br>(1.11–1.6)  |
| Nayarit          | 1952        | 1.3<br>(1.09–1.53)  |
| Nayarit          | 1953        | 1.28<br>(1.1–1.49)  |
| Nayarit          | 1954        | 1.25<br>(1.08–1.46) |
| Nayarit          | 1955        | 1.22<br>(1.06–1.41) |
| Nayarit          | 1956        | 1.2<br>(1.04–1.37)  |
| Nayarit          | 1957        | 1.18<br>(1.03–1.36) |
| Nayarit          | 1958        | 1.16<br>(1.01–1.34) |
| Nayarit          | 1959        | 1.14<br>(0.98–1.32) |
| Nayarit          | 1960        | 1.14<br>(0.98–1.3)  |
| Nayarit          | 1961        | 1.12<br>(0.98–1.28) |
| Nayarit          | 1962        | 1.1<br>(0.96–1.25)  |
| Nayarit          | 1963        | 1.09<br>(0.96–1.24) |
| Nayarit          | 1964        | 1.09<br>(0.96–1.24) |
| Nayarit          | 1965        | 1.09<br>(0.96–1.23) |
| Nayarit          | 1966        | 1.1<br>(0.97–1.24)  |
| Nayarit          | 1967        | 1.1<br>(0.97–1.23)  |
| Nayarit          | 1968        | 1.1<br>(0.98–1.24)  |
| Nayarit          | 1969        | 1.11<br>(0.99–1.25) |
| Nayarit          | 1970        | 1.12<br>(0.99–1.25) |
| Nayarit          | 1971        | 1.12<br>(1.0–1.24)  |
| Nayarit          | 1972        | 1.12<br>(1.01–1.24) |
| Nayarit          | 1973        | 1.13<br>(1.02–1.24) |
| Nayarit          | 1974        | 1.12<br>(1.01–1.24) |
| Nayarit          | 1975        | 1.11<br>(1.0–1.23)  |

**Table 15 Ratio of adjusted to unadjusted 5q0 values for scaled locations by year**

| <b>Geography</b> | <b>Year</b> | <b>Ratio</b>        |
|------------------|-------------|---------------------|
| Nayarit          | 1976        | 1.11<br>(1.0–1.23)  |
| Nayarit          | 1977        | 1.11<br>(1.0–1.23)  |
| Nayarit          | 1978        | 1.1<br>(1.0–1.23)   |
| Nayarit          | 1979        | 1.09<br>(0.99–1.21) |
| Nayarit          | 1980        | 1.07<br>(0.98–1.18) |
| Nayarit          | 1981        | 1.06<br>(0.97–1.16) |
| Nayarit          | 1982        | 1.04<br>(0.95–1.14) |
| Nayarit          | 1983        | 1.03<br>(0.95–1.12) |
| Nayarit          | 1984        | 1.04<br>(0.96–1.12) |
| Nayarit          | 1985        | 1.05<br>(0.97–1.14) |
| Nayarit          | 1986        | 1.06<br>(0.98–1.16) |
| Nayarit          | 1987        | 1.05<br>(0.96–1.14) |
| Nayarit          | 1988        | 1.03<br>(0.95–1.13) |
| Nayarit          | 1989        | 1.0<br>(0.92–1.08)  |
| Nayarit          | 1990        | 1.0<br>(0.92–1.08)  |
| Nayarit          | 1991        | 1.02<br>(0.93–1.12) |
| Nayarit          | 1992        | 1.03<br>(0.93–1.13) |
| Nayarit          | 1993        | 1.03<br>(0.93–1.15) |
| Nayarit          | 1994        | 1.03<br>(0.92–1.15) |
| Nayarit          | 1995        | 1.02<br>(0.91–1.14) |
| Nayarit          | 1996        | 1.02<br>(0.9–1.14)  |
| Nayarit          | 1997        | 1.02<br>(0.9–1.14)  |
| Nayarit          | 1998        | 1.03<br>(0.92–1.15) |
| Nayarit          | 1999        | 1.04<br>(0.93–1.15) |
| Nayarit          | 2000        | 1.05<br>(0.96–1.14) |
| Nayarit          | 2001        | 1.06<br>(0.98–1.14) |
| Nayarit          | 2002        | 1.07<br>(0.99–1.14) |
| Nayarit          | 2003        | 1.08<br>(1.0–1.16)  |
| Nayarit          | 2004        | 1.09<br>(1.0–1.19)  |
| Nayarit          | 2005        | 1.11<br>(1.0–1.24)  |
| Nayarit          | 2006        | 1.13<br>(1.0–1.27)  |

**Table 15 Ratio of adjusted to unadjusted 5q0 values for scaled locations by year**

| <b>Geography</b> | <b>Year</b> | <b>Ratio</b>        |
|------------------|-------------|---------------------|
| Nayarit          | 2007        | 1.15<br>(1.01–1.3)  |
| Nayarit          | 2008        | 1.17<br>(1.02–1.34) |
| Nayarit          | 2009        | 1.19<br>(1.03–1.37) |
| Nayarit          | 2010        | 1.2<br>(1.04–1.39)  |
| Nayarit          | 2011        | 1.2<br>(1.04–1.4)   |
| Nayarit          | 2012        | 1.18<br>(1.02–1.37) |
| Nayarit          | 2013        | 1.18<br>(1.0–1.37)  |
| Nayarit          | 2014        | 1.18<br>(1.01–1.37) |
| Nayarit          | 2015        | 1.2<br>(1.02–1.41)  |
| Nayarit          | 2016        | 1.18<br>(0.99–1.4)  |
| Nayarit          | 2017        | 1.19<br>(0.99–1.41) |
| Nuevo León       | 1950        | 1.34<br>(1.08–1.63) |
| Nuevo León       | 1951        | 1.35<br>(1.11–1.62) |
| Nuevo León       | 1952        | 1.31<br>(1.09–1.54) |
| Nuevo León       | 1953        | 1.29<br>(1.1–1.51)  |
| Nuevo León       | 1954        | 1.25<br>(1.08–1.47) |
| Nuevo León       | 1955        | 1.23<br>(1.07–1.42) |
| Nuevo León       | 1956        | 1.2<br>(1.04–1.38)  |
| Nuevo León       | 1957        | 1.19<br>(1.03–1.37) |
| Nuevo León       | 1958        | 1.17<br>(1.01–1.35) |
| Nuevo León       | 1959        | 1.14<br>(0.98–1.33) |
| Nuevo León       | 1960        | 1.14<br>(0.98–1.31) |
| Nuevo León       | 1961        | 1.13<br>(0.98–1.29) |
| Nuevo León       | 1962        | 1.1<br>(0.96–1.26)  |
| Nuevo León       | 1963        | 1.09<br>(0.96–1.24) |
| Nuevo León       | 1964        | 1.09<br>(0.96–1.25) |
| Nuevo León       | 1965        | 1.09<br>(0.96–1.24) |
| Nuevo León       | 1966        | 1.1<br>(0.97–1.24)  |
| Nuevo León       | 1967        | 1.1<br>(0.97–1.23)  |
| Nuevo León       | 1968        | 1.1<br>(0.98–1.24)  |
| Nuevo León       | 1969        | 1.11<br>(0.99–1.26) |

**Table 15 Ratio of adjusted to unadjusted 5q0 values for scaled locations by year**

| <b>Geography</b> | <b>Year</b> | <b>Ratio</b>        |
|------------------|-------------|---------------------|
| Nuevo León       | 1970        | 1.12<br>(0.99–1.25) |
| Nuevo León       | 1971        | 1.12<br>(1.0–1.25)  |
| Nuevo León       | 1972        | 1.12<br>(1.01–1.25) |
| Nuevo León       | 1973        | 1.13<br>(1.02–1.25) |
| Nuevo León       | 1974        | 1.12<br>(1.01–1.24) |
| Nuevo León       | 1975        | 1.11<br>(1.0–1.23)  |
| Nuevo León       | 1976        | 1.11<br>(1.0–1.23)  |
| Nuevo León       | 1977        | 1.11<br>(1.0–1.24)  |
| Nuevo León       | 1978        | 1.1<br>(1.0–1.23)   |
| Nuevo León       | 1979        | 1.09<br>(0.99–1.21) |
| Nuevo León       | 1980        | 1.07<br>(0.98–1.18) |
| Nuevo León       | 1981        | 1.06<br>(0.97–1.16) |
| Nuevo León       | 1982        | 1.04<br>(0.95–1.14) |
| Nuevo León       | 1983        | 1.03<br>(0.95–1.12) |
| Nuevo León       | 1984        | 1.04<br>(0.96–1.12) |
| Nuevo León       | 1985        | 1.05<br>(0.97–1.14) |
| Nuevo León       | 1986        | 1.06<br>(0.98–1.16) |
| Nuevo León       | 1987        | 1.05<br>(0.96–1.14) |
| Nuevo León       | 1988        | 1.03<br>(0.95–1.13) |
| Nuevo León       | 1989        | 1.0<br>(0.92–1.08)  |
| Nuevo León       | 1990        | 1.0<br>(0.92–1.08)  |
| Nuevo León       | 1991        | 1.02<br>(0.93–1.12) |
| Nuevo León       | 1992        | 1.03<br>(0.93–1.13) |
| Nuevo León       | 1993        | 1.03<br>(0.93–1.16) |
| Nuevo León       | 1994        | 1.03<br>(0.92–1.15) |
| Nuevo León       | 1995        | 1.02<br>(0.91–1.14) |
| Nuevo León       | 1996        | 1.02<br>(0.9–1.14)  |
| Nuevo León       | 1997        | 1.02<br>(0.9–1.14)  |
| Nuevo León       | 1998        | 1.03<br>(0.92–1.15) |
| Nuevo León       | 1999        | 1.04<br>(0.93–1.15) |
| Nuevo León       | 2000        | 1.05<br>(0.96–1.14) |

**Table 15 Ratio of adjusted to unadjusted 5q0 values for scaled locations by year**

| <b>Geography</b> | <b>Year</b> | <b>Ratio</b>        |
|------------------|-------------|---------------------|
| Nuevo León       | 2001        | 1.06<br>(0.98–1.14) |
| Nuevo León       | 2002        | 1.07<br>(0.99–1.14) |
| Nuevo León       | 2003        | 1.08<br>(1.0–1.16)  |
| Nuevo León       | 2004        | 1.09<br>(1.0–1.19)  |
| Nuevo León       | 2005        | 1.11<br>(1.0–1.24)  |
| Nuevo León       | 2006        | 1.13<br>(1.0–1.27)  |
| Nuevo León       | 2007        | 1.15<br>(1.01–1.3)  |
| Nuevo León       | 2008        | 1.17<br>(1.02–1.34) |
| Nuevo León       | 2009        | 1.19<br>(1.03–1.37) |
| Nuevo León       | 2010        | 1.2<br>(1.04–1.39)  |
| Nuevo León       | 2011        | 1.2<br>(1.04–1.4)   |
| Nuevo León       | 2012        | 1.18<br>(1.02–1.37) |
| Nuevo León       | 2013        | 1.18<br>(1.0–1.37)  |
| Nuevo León       | 2014        | 1.18<br>(1.01–1.37) |
| Nuevo León       | 2015        | 1.2<br>(1.02–1.41)  |
| Nuevo León       | 2016        | 1.18<br>(0.99–1.4)  |
| Nuevo León       | 2017        | 1.19<br>(0.99–1.41) |
| Oaxaca           | 1950        | 1.33<br>(1.08–1.6)  |
| Oaxaca           | 1951        | 1.34<br>(1.11–1.59) |
| Oaxaca           | 1952        | 1.3<br>(1.09–1.53)  |
| Oaxaca           | 1953        | 1.28<br>(1.1–1.49)  |
| Oaxaca           | 1954        | 1.24<br>(1.08–1.45) |
| Oaxaca           | 1955        | 1.22<br>(1.06–1.4)  |
| Oaxaca           | 1956        | 1.19<br>(1.04–1.37) |
| Oaxaca           | 1957        | 1.18<br>(1.03–1.36) |
| Oaxaca           | 1958        | 1.16<br>(1.01–1.34) |
| Oaxaca           | 1959        | 1.14<br>(0.98–1.32) |
| Oaxaca           | 1960        | 1.14<br>(0.98–1.3)  |
| Oaxaca           | 1961        | 1.12<br>(0.98–1.28) |
| Oaxaca           | 1962        | 1.1<br>(0.96–1.25)  |
| Oaxaca           | 1963        | 1.09<br>(0.96–1.24) |



**Table 15 Ratio of adjusted to unadjusted 5q0 values for scaled locations by year**

| <b>Geography</b> | <b>Year</b> | <b>Ratio</b>        |
|------------------|-------------|---------------------|
| Oaxaca           | 1964        | 1.09<br>(0.96–1.24) |
| Oaxaca           | 1965        | 1.09<br>(0.96–1.23) |
| Oaxaca           | 1966        | 1.09<br>(0.97–1.23) |
| Oaxaca           | 1967        | 1.1<br>(0.97–1.22)  |
| Oaxaca           | 1968        | 1.1<br>(0.98–1.24)  |
| Oaxaca           | 1969        | 1.11<br>(0.99–1.25) |
| Oaxaca           | 1970        | 1.12<br>(0.99–1.25) |
| Oaxaca           | 1971        | 1.11<br>(1.0–1.24)  |
| Oaxaca           | 1972        | 1.12<br>(1.01–1.24) |
| Oaxaca           | 1973        | 1.13<br>(1.02–1.24) |
| Oaxaca           | 1974        | 1.11<br>(1.01–1.23) |
| Oaxaca           | 1975        | 1.11<br>(1.0–1.23)  |
| Oaxaca           | 1976        | 1.11<br>(1.0–1.22)  |
| Oaxaca           | 1977        | 1.11<br>(1.0–1.23)  |
| Oaxaca           | 1978        | 1.1<br>(1.0–1.23)   |
| Oaxaca           | 1979        | 1.09<br>(0.99–1.21) |
| Oaxaca           | 1980        | 1.07<br>(0.98–1.17) |
| Oaxaca           | 1981        | 1.06<br>(0.97–1.16) |
| Oaxaca           | 1982        | 1.04<br>(0.95–1.14) |
| Oaxaca           | 1983        | 1.03<br>(0.95–1.12) |
| Oaxaca           | 1984        | 1.04<br>(0.96–1.12) |
| Oaxaca           | 1985        | 1.05<br>(0.97–1.14) |
| Oaxaca           | 1986        | 1.06<br>(0.98–1.16) |
| Oaxaca           | 1987        | 1.05<br>(0.96–1.14) |
| Oaxaca           | 1988        | 1.03<br>(0.95–1.13) |
| Oaxaca           | 1989        | 1.0<br>(0.92–1.08)  |
| Oaxaca           | 1990        | 1.0<br>(0.92–1.08)  |
| Oaxaca           | 1991        | 1.02<br>(0.93–1.12) |
| Oaxaca           | 1992        | 1.03<br>(0.93–1.13) |
| Oaxaca           | 1993        | 1.03<br>(0.93–1.15) |
| Oaxaca           | 1994        | 1.03<br>(0.92–1.15) |

**Table 15 Ratio of adjusted to unadjusted 5q0 values for scaled locations by year**

| <b>Geography</b> | <b>Year</b> | <b>Ratio</b>        |
|------------------|-------------|---------------------|
| Oaxaca           | 1995        | 1.02<br>(0.91–1.14) |
| Oaxaca           | 1996        | 1.02<br>(0.9–1.14)  |
| Oaxaca           | 1997        | 1.02<br>(0.9–1.14)  |
| Oaxaca           | 1998        | 1.03<br>(0.92–1.15) |
| Oaxaca           | 1999        | 1.04<br>(0.93–1.14) |
| Oaxaca           | 2000        | 1.05<br>(0.96–1.14) |
| Oaxaca           | 2001        | 1.06<br>(0.98–1.14) |
| Oaxaca           | 2002        | 1.07<br>(0.99–1.14) |
| Oaxaca           | 2003        | 1.08<br>(1.0–1.16)  |
| Oaxaca           | 2004        | 1.09<br>(1.0–1.19)  |
| Oaxaca           | 2005        | 1.11<br>(1.0–1.24)  |
| Oaxaca           | 2006        | 1.13<br>(1.0–1.27)  |
| Oaxaca           | 2007        | 1.15<br>(1.01–1.3)  |
| Oaxaca           | 2008        | 1.17<br>(1.02–1.34) |
| Oaxaca           | 2009        | 1.19<br>(1.03–1.37) |
| Oaxaca           | 2010        | 1.2<br>(1.04–1.38)  |
| Oaxaca           | 2011        | 1.2<br>(1.04–1.39)  |
| Oaxaca           | 2012        | 1.18<br>(1.02–1.36) |
| Oaxaca           | 2013        | 1.17<br>(1.0–1.37)  |
| Oaxaca           | 2014        | 1.18<br>(1.01–1.37) |
| Oaxaca           | 2015        | 1.2<br>(1.02–1.41)  |
| Oaxaca           | 2016        | 1.18<br>(0.99–1.4)  |
| Oaxaca           | 2017        | 1.19<br>(0.99–1.41) |
| Puebla           | 1950        | 1.33<br>(1.07–1.59) |
| Puebla           | 1951        | 1.33<br>(1.11–1.58) |
| Puebla           | 1952        | 1.29<br>(1.09–1.52) |
| Puebla           | 1953        | 1.27<br>(1.09–1.49) |
| Puebla           | 1954        | 1.24<br>(1.08–1.44) |
| Puebla           | 1955        | 1.22<br>(1.06–1.4)  |
| Puebla           | 1956        | 1.19<br>(1.04–1.37) |
| Puebla           | 1957        | 1.18<br>(1.03–1.35) |

**Table 15 Ratio of adjusted to unadjusted 5q0 values for scaled locations by year**

| <b>Geography</b> | <b>Year</b> | <b>Ratio</b>        |
|------------------|-------------|---------------------|
| Puebla           | 1958        | 1.16<br>(1.01–1.33) |
| Puebla           | 1959        | 1.14<br>(0.98–1.31) |
| Puebla           | 1960        | 1.13<br>(0.98–1.29) |
| Puebla           | 1961        | 1.12<br>(0.98–1.28) |
| Puebla           | 1962        | 1.1<br>(0.97–1.25)  |
| Puebla           | 1963        | 1.09<br>(0.96–1.24) |
| Puebla           | 1964        | 1.09<br>(0.96–1.24) |
| Puebla           | 1965        | 1.09<br>(0.96–1.23) |
| Puebla           | 1966        | 1.09<br>(0.97–1.23) |
| Puebla           | 1967        | 1.1<br>(0.97–1.22)  |
| Puebla           | 1968        | 1.1<br>(0.98–1.24)  |
| Puebla           | 1969        | 1.11<br>(0.99–1.25) |
| Puebla           | 1970        | 1.12<br>(0.99–1.25) |
| Puebla           | 1971        | 1.11<br>(1.0–1.24)  |
| Puebla           | 1972        | 1.12<br>(1.01–1.24) |
| Puebla           | 1973        | 1.13<br>(1.02–1.24) |
| Puebla           | 1974        | 1.11<br>(1.01–1.23) |
| Puebla           | 1975        | 1.11<br>(1.0–1.23)  |
| Puebla           | 1976        | 1.11<br>(1.0–1.22)  |
| Puebla           | 1977        | 1.11<br>(1.0–1.23)  |
| Puebla           | 1978        | 1.1<br>(1.0–1.23)   |
| Puebla           | 1979        | 1.09<br>(0.99–1.21) |
| Puebla           | 1980        | 1.07<br>(0.98–1.18) |
| Puebla           | 1981        | 1.06<br>(0.97–1.16) |
| Puebla           | 1982        | 1.04<br>(0.95–1.14) |
| Puebla           | 1983        | 1.03<br>(0.95–1.11) |
| Puebla           | 1984        | 1.04<br>(0.96–1.12) |
| Puebla           | 1985        | 1.05<br>(0.97–1.14) |
| Puebla           | 1986        | 1.06<br>(0.98–1.16) |
| Puebla           | 1987        | 1.05<br>(0.96–1.14) |
| Puebla           | 1988        | 1.03<br>(0.95–1.12) |

**Table 15 Ratio of adjusted to unadjusted 5q0 values for scaled locations by year**

| <b>Geography</b> | <b>Year</b> | <b>Ratio</b>        |
|------------------|-------------|---------------------|
| Puebla           | 1989        | 1.0<br>(0.92–1.08)  |
| Puebla           | 1990        | 1.0<br>(0.92–1.08)  |
| Puebla           | 1991        | 1.02<br>(0.93–1.12) |
| Puebla           | 1992        | 1.03<br>(0.93–1.13) |
| Puebla           | 1993        | 1.03<br>(0.93–1.15) |
| Puebla           | 1994        | 1.03<br>(0.92–1.15) |
| Puebla           | 1995        | 1.02<br>(0.91–1.14) |
| Puebla           | 1996        | 1.02<br>(0.9–1.14)  |
| Puebla           | 1997        | 1.02<br>(0.9–1.14)  |
| Puebla           | 1998        | 1.03<br>(0.92–1.15) |
| Puebla           | 1999        | 1.04<br>(0.93–1.14) |
| Puebla           | 2000        | 1.05<br>(0.96–1.14) |
| Puebla           | 2001        | 1.06<br>(0.98–1.14) |
| Puebla           | 2002        | 1.07<br>(0.99–1.14) |
| Puebla           | 2003        | 1.08<br>(1.0–1.16)  |
| Puebla           | 2004        | 1.09<br>(1.0–1.19)  |
| Puebla           | 2005        | 1.11<br>(1.0–1.23)  |
| Puebla           | 2006        | 1.13<br>(1.0–1.27)  |
| Puebla           | 2007        | 1.15<br>(1.01–1.3)  |
| Puebla           | 2008        | 1.17<br>(1.02–1.33) |
| Puebla           | 2009        | 1.19<br>(1.03–1.37) |
| Puebla           | 2010        | 1.2<br>(1.04–1.38)  |
| Puebla           | 2011        | 1.2<br>(1.04–1.39)  |
| Puebla           | 2012        | 1.18<br>(1.02–1.36) |
| Puebla           | 2013        | 1.17<br>(1.0–1.36)  |
| Puebla           | 2014        | 1.18<br>(1.01–1.37) |
| Puebla           | 2015        | 1.2<br>(1.02–1.4)   |
| Puebla           | 2016        | 1.18<br>(0.99–1.4)  |
| Puebla           | 2017        | 1.19<br>(0.99–1.41) |
| Querétaro        | 1950        | 1.34<br>(1.08–1.62) |
| Querétaro        | 1951        | 1.35<br>(1.11–1.61) |

**Table 15 Ratio of adjusted to unadjusted 5q0 values for scaled locations by year**

| <b>Geography</b> | <b>Year</b> | <b>Ratio</b>        |
|------------------|-------------|---------------------|
| Querétaro        | 1952        | 1.3<br>(1.09–1.54)  |
| Querétaro        | 1953        | 1.28<br>(1.1–1.5)   |
| Querétaro        | 1954        | 1.25<br>(1.08–1.46) |
| Querétaro        | 1955        | 1.23<br>(1.06–1.42) |
| Querétaro        | 1956        | 1.2<br>(1.04–1.37)  |
| Querétaro        | 1957        | 1.18<br>(1.03–1.36) |
| Querétaro        | 1958        | 1.16<br>(1.01–1.35) |
| Querétaro        | 1959        | 1.14<br>(0.98–1.32) |
| Querétaro        | 1960        | 1.14<br>(0.98–1.31) |
| Querétaro        | 1961        | 1.12<br>(0.98–1.28) |
| Querétaro        | 1962        | 1.1<br>(0.96–1.25)  |
| Querétaro        | 1963        | 1.09<br>(0.96–1.24) |
| Querétaro        | 1964        | 1.09<br>(0.96–1.24) |
| Querétaro        | 1965        | 1.09<br>(0.96–1.24) |
| Querétaro        | 1966        | 1.1<br>(0.97–1.24)  |
| Querétaro        | 1967        | 1.1<br>(0.97–1.23)  |
| Querétaro        | 1968        | 1.1<br>(0.98–1.24)  |
| Querétaro        | 1969        | 1.11<br>(0.99–1.25) |
| Querétaro        | 1970        | 1.12<br>(0.99–1.25) |
| Querétaro        | 1971        | 1.12<br>(1.0–1.24)  |
| Querétaro        | 1972        | 1.12<br>(1.01–1.24) |
| Querétaro        | 1973        | 1.13<br>(1.02–1.24) |
| Querétaro        | 1974        | 1.12<br>(1.01–1.24) |
| Querétaro        | 1975        | 1.11<br>(1.0–1.23)  |
| Querétaro        | 1976        | 1.11<br>(1.0–1.23)  |
| Querétaro        | 1977        | 1.11<br>(1.0–1.23)  |
| Querétaro        | 1978        | 1.1<br>(1.0–1.23)   |
| Querétaro        | 1979        | 1.09<br>(0.99–1.21) |
| Querétaro        | 1980        | 1.07<br>(0.98–1.18) |
| Querétaro        | 1981        | 1.06<br>(0.97–1.16) |
| Querétaro        | 1982        | 1.04<br>(0.95–1.14) |

**Table 15 Ratio of adjusted to unadjusted 5q0 values for scaled locations by year**

| <b>Geography</b> | <b>Year</b> | <b>Ratio</b>        |
|------------------|-------------|---------------------|
| Querétaro        | 1983        | 1.03<br>(0.95–1.12) |
| Querétaro        | 1984        | 1.04<br>(0.96–1.12) |
| Querétaro        | 1985        | 1.05<br>(0.97–1.14) |
| Querétaro        | 1986        | 1.06<br>(0.98–1.16) |
| Querétaro        | 1987        | 1.05<br>(0.96–1.14) |
| Querétaro        | 1988        | 1.03<br>(0.95–1.13) |
| Querétaro        | 1989        | 1.0<br>(0.92–1.08)  |
| Querétaro        | 1990        | 1.0<br>(0.92–1.08)  |
| Querétaro        | 1991        | 1.02<br>(0.93–1.12) |
| Querétaro        | 1992        | 1.03<br>(0.93–1.13) |
| Querétaro        | 1993        | 1.03<br>(0.93–1.15) |
| Querétaro        | 1994        | 1.03<br>(0.92–1.15) |
| Querétaro        | 1995        | 1.02<br>(0.91–1.14) |
| Querétaro        | 1996        | 1.02<br>(0.9–1.14)  |
| Querétaro        | 1997        | 1.02<br>(0.9–1.14)  |
| Querétaro        | 1998        | 1.03<br>(0.92–1.15) |
| Querétaro        | 1999        | 1.04<br>(0.93–1.15) |
| Querétaro        | 2000        | 1.05<br>(0.96–1.14) |
| Querétaro        | 2001        | 1.06<br>(0.98–1.14) |
| Querétaro        | 2002        | 1.07<br>(0.99–1.14) |
| Querétaro        | 2003        | 1.08<br>(1.0–1.16)  |
| Querétaro        | 2004        | 1.09<br>(1.0–1.19)  |
| Querétaro        | 2005        | 1.11<br>(1.0–1.24)  |
| Querétaro        | 2006        | 1.13<br>(1.0–1.27)  |
| Querétaro        | 2007        | 1.15<br>(1.01–1.3)  |
| Querétaro        | 2008        | 1.17<br>(1.02–1.34) |
| Querétaro        | 2009        | 1.19<br>(1.03–1.37) |
| Querétaro        | 2010        | 1.2<br>(1.04–1.38)  |
| Querétaro        | 2011        | 1.2<br>(1.04–1.39)  |
| Querétaro        | 2012        | 1.18<br>(1.02–1.37) |
| Querétaro        | 2013        | 1.18<br>(1.0–1.37)  |

**Table 15 Ratio of adjusted to unadjusted 5q0 values for scaled locations by year**

| <b>Geography</b> | <b>Year</b> | <b>Ratio</b>        |
|------------------|-------------|---------------------|
| Querétaro        | 2014        | 1.18<br>(1.01–1.37) |
| Querétaro        | 2015        | 1.2<br>(1.02–1.41)  |
| Querétaro        | 2016        | 1.18<br>(0.99–1.4)  |
| Querétaro        | 2017        | 1.19<br>(0.99–1.41) |
| Quintana Roo     | 1950        | 1.35<br>(1.08–1.64) |
| Quintana Roo     | 1951        | 1.36<br>(1.11–1.63) |
| Quintana Roo     | 1952        | 1.31<br>(1.09–1.55) |
| Quintana Roo     | 1953        | 1.29<br>(1.1–1.51)  |
| Quintana Roo     | 1954        | 1.26<br>(1.08–1.47) |
| Quintana Roo     | 1955        | 1.23<br>(1.07–1.43) |
| Quintana Roo     | 1956        | 1.2<br>(1.04–1.38)  |
| Quintana Roo     | 1957        | 1.19<br>(1.03–1.37) |
| Quintana Roo     | 1958        | 1.17<br>(1.01–1.35) |
| Quintana Roo     | 1959        | 1.14<br>(0.98–1.33) |
| Quintana Roo     | 1960        | 1.14<br>(0.98–1.31) |
| Quintana Roo     | 1961        | 1.13<br>(0.98–1.29) |
| Quintana Roo     | 1962        | 1.1<br>(0.96–1.26)  |
| Quintana Roo     | 1963        | 1.09<br>(0.96–1.24) |
| Quintana Roo     | 1964        | 1.09<br>(0.96–1.25) |
| Quintana Roo     | 1965        | 1.09<br>(0.96–1.24) |
| Quintana Roo     | 1966        | 1.1<br>(0.97–1.24)  |
| Quintana Roo     | 1967        | 1.1<br>(0.97–1.23)  |
| Quintana Roo     | 1968        | 1.1<br>(0.98–1.24)  |
| Quintana Roo     | 1969        | 1.11<br>(0.99–1.25) |
| Quintana Roo     | 1970        | 1.12<br>(0.99–1.25) |
| Quintana Roo     | 1971        | 1.12<br>(1.0–1.24)  |
| Quintana Roo     | 1972        | 1.12<br>(1.01–1.24) |
| Quintana Roo     | 1973        | 1.13<br>(1.02–1.24) |
| Quintana Roo     | 1974        | 1.12<br>(1.01–1.24) |
| Quintana Roo     | 1975        | 1.11<br>(1.0–1.23)  |
| Quintana Roo     | 1976        | 1.11<br>(1.0–1.23)  |

**Table 15 Ratio of adjusted to unadjusted 5q0 values for scaled locations by year**

| <b>Geography</b> | <b>Year</b> | <b>Ratio</b>        |
|------------------|-------------|---------------------|
| Quintana Roo     | 1977        | 1.11<br>(1.0–1.23)  |
| Quintana Roo     | 1978        | 1.1<br>(1.0–1.23)   |
| Quintana Roo     | 1979        | 1.09<br>(0.99–1.21) |
| Quintana Roo     | 1980        | 1.07<br>(0.98–1.18) |
| Quintana Roo     | 1981        | 1.06<br>(0.97–1.16) |
| Quintana Roo     | 1982        | 1.04<br>(0.95–1.14) |
| Quintana Roo     | 1983        | 1.03<br>(0.95–1.12) |
| Quintana Roo     | 1984        | 1.04<br>(0.96–1.12) |
| Quintana Roo     | 1985        | 1.05<br>(0.97–1.14) |
| Quintana Roo     | 1986        | 1.06<br>(0.98–1.16) |
| Quintana Roo     | 1987        | 1.05<br>(0.96–1.14) |
| Quintana Roo     | 1988        | 1.03<br>(0.95–1.13) |
| Quintana Roo     | 1989        | 1.0<br>(0.92–1.08)  |
| Quintana Roo     | 1990        | 1.0<br>(0.92–1.08)  |
| Quintana Roo     | 1991        | 1.02<br>(0.93–1.12) |
| Quintana Roo     | 1992        | 1.03<br>(0.93–1.13) |
| Quintana Roo     | 1993        | 1.03<br>(0.93–1.15) |
| Quintana Roo     | 1994        | 1.03<br>(0.92–1.15) |
| Quintana Roo     | 1995        | 1.02<br>(0.91–1.14) |
| Quintana Roo     | 1996        | 1.02<br>(0.9–1.14)  |
| Quintana Roo     | 1997        | 1.02<br>(0.9–1.14)  |
| Quintana Roo     | 1998        | 1.03<br>(0.92–1.15) |
| Quintana Roo     | 1999        | 1.04<br>(0.93–1.15) |
| Quintana Roo     | 2000        | 1.05<br>(0.96–1.14) |
| Quintana Roo     | 2001        | 1.06<br>(0.98–1.14) |
| Quintana Roo     | 2002        | 1.07<br>(0.99–1.14) |
| Quintana Roo     | 2003        | 1.08<br>(1.0–1.16)  |
| Quintana Roo     | 2004        | 1.09<br>(1.0–1.19)  |
| Quintana Roo     | 2005        | 1.11<br>(1.0–1.24)  |
| Quintana Roo     | 2006        | 1.13<br>(1.0–1.27)  |
| Quintana Roo     | 2007        | 1.15<br>(1.01–1.3)  |



**Table 15 Ratio of adjusted to unadjusted 5q0 values for scaled locations by year**

| <b>Geography</b> | <b>Year</b> | <b>Ratio</b>        |
|------------------|-------------|---------------------|
| Quintana Roo     | 2008        | 1.17<br>(1.02–1.34) |
| Quintana Roo     | 2009        | 1.19<br>(1.03–1.37) |
| Quintana Roo     | 2010        | 1.2<br>(1.04–1.38)  |
| Quintana Roo     | 2011        | 1.2<br>(1.04–1.39)  |
| Quintana Roo     | 2012        | 1.18<br>(1.02–1.37) |
| Quintana Roo     | 2013        | 1.18<br>(1.0–1.37)  |
| Quintana Roo     | 2014        | 1.18<br>(1.01–1.37) |
| Quintana Roo     | 2015        | 1.2<br>(1.02–1.41)  |
| Quintana Roo     | 2016        | 1.18<br>(0.99–1.4)  |
| Quintana Roo     | 2017        | 1.19<br>(0.99–1.41) |
| San Luis Potosí  | 1950        | 1.33<br>(1.08–1.61) |
| San Luis Potosí  | 1951        | 1.34<br>(1.11–1.6)  |
| San Luis Potosí  | 1952        | 1.3<br>(1.09–1.53)  |
| San Luis Potosí  | 1953        | 1.28<br>(1.1–1.49)  |
| San Luis Potosí  | 1954        | 1.25<br>(1.08–1.45) |
| San Luis Potosí  | 1955        | 1.22<br>(1.06–1.41) |
| San Luis Potosí  | 1956        | 1.2<br>(1.04–1.37)  |
| San Luis Potosí  | 1957        | 1.18<br>(1.03–1.36) |
| San Luis Potosí  | 1958        | 1.16<br>(1.01–1.34) |
| San Luis Potosí  | 1959        | 1.14<br>(0.98–1.32) |
| San Luis Potosí  | 1960        | 1.14<br>(0.98–1.3)  |
| San Luis Potosí  | 1961        | 1.12<br>(0.98–1.28) |
| San Luis Potosí  | 1962        | 1.1<br>(0.96–1.25)  |
| San Luis Potosí  | 1963        | 1.09<br>(0.96–1.24) |
| San Luis Potosí  | 1964        | 1.09<br>(0.96–1.24) |
| San Luis Potosí  | 1965        | 1.09<br>(0.96–1.23) |
| San Luis Potosí  | 1966        | 1.1<br>(0.97–1.23)  |
| San Luis Potosí  | 1967        | 1.1<br>(0.97–1.23)  |
| San Luis Potosí  | 1968        | 1.1<br>(0.98–1.24)  |
| San Luis Potosí  | 1969        | 1.11<br>(0.99–1.25) |
| San Luis Potosí  | 1970        | 1.12<br>(0.99–1.25) |

**Table 15 Ratio of adjusted to unadjusted 5q0 values for scaled locations by year**

| <b>Geography</b> | <b>Year</b> | <b>Ratio</b>        |
|------------------|-------------|---------------------|
| San Luis Potosí  | 1971        | 1.12<br>(1.0–1.24)  |
| San Luis Potosí  | 1972        | 1.12<br>(1.01–1.24) |
| San Luis Potosí  | 1973        | 1.13<br>(1.02–1.24) |
| San Luis Potosí  | 1974        | 1.12<br>(1.01–1.24) |
| San Luis Potosí  | 1975        | 1.11<br>(1.0–1.23)  |
| San Luis Potosí  | 1976        | 1.11<br>(1.0–1.23)  |
| San Luis Potosí  | 1977        | 1.11<br>(1.0–1.23)  |
| San Luis Potosí  | 1978        | 1.1<br>(1.0–1.23)   |
| San Luis Potosí  | 1979        | 1.09<br>(0.99–1.21) |
| San Luis Potosí  | 1980        | 1.07<br>(0.98–1.18) |
| San Luis Potosí  | 1981        | 1.06<br>(0.97–1.16) |
| San Luis Potosí  | 1982        | 1.04<br>(0.95–1.14) |
| San Luis Potosí  | 1983        | 1.03<br>(0.95–1.12) |
| San Luis Potosí  | 1984        | 1.04<br>(0.96–1.12) |
| San Luis Potosí  | 1985        | 1.05<br>(0.97–1.14) |
| San Luis Potosí  | 1986        | 1.06<br>(0.98–1.16) |
| San Luis Potosí  | 1987        | 1.05<br>(0.96–1.14) |
| San Luis Potosí  | 1988        | 1.03<br>(0.95–1.13) |
| San Luis Potosí  | 1989        | 1.0<br>(0.92–1.08)  |
| San Luis Potosí  | 1990        | 1.0<br>(0.92–1.08)  |
| San Luis Potosí  | 1991        | 1.02<br>(0.93–1.12) |
| San Luis Potosí  | 1992        | 1.03<br>(0.93–1.13) |
| San Luis Potosí  | 1993        | 1.03<br>(0.93–1.15) |
| San Luis Potosí  | 1994        | 1.03<br>(0.92–1.15) |
| San Luis Potosí  | 1995        | 1.02<br>(0.91–1.14) |
| San Luis Potosí  | 1996        | 1.02<br>(0.9–1.14)  |
| San Luis Potosí  | 1997        | 1.02<br>(0.9–1.14)  |
| San Luis Potosí  | 1998        | 1.03<br>(0.92–1.15) |
| San Luis Potosí  | 1999        | 1.04<br>(0.93–1.15) |
| San Luis Potosí  | 2000        | 1.05<br>(0.96–1.14) |
| San Luis Potosí  | 2001        | 1.06<br>(0.98–1.14) |

**Table 15 Ratio of adjusted to unadjusted 5q0 values for scaled locations by year**

| <b>Geography</b> | <b>Year</b> | <b>Ratio</b>        |
|------------------|-------------|---------------------|
| San Luis Potosí  | 2002        | 1.07<br>(0.99–1.14) |
| San Luis Potosí  | 2003        | 1.08<br>(1.0–1.16)  |
| San Luis Potosí  | 2004        | 1.09<br>(1.0–1.19)  |
| San Luis Potosí  | 2005        | 1.11<br>(1.0–1.24)  |
| San Luis Potosí  | 2006        | 1.13<br>(1.0–1.27)  |
| San Luis Potosí  | 2007        | 1.15<br>(1.01–1.3)  |
| San Luis Potosí  | 2008        | 1.17<br>(1.02–1.34) |
| San Luis Potosí  | 2009        | 1.19<br>(1.03–1.37) |
| San Luis Potosí  | 2010        | 1.2<br>(1.04–1.38)  |
| San Luis Potosí  | 2011        | 1.2<br>(1.04–1.39)  |
| San Luis Potosí  | 2012        | 1.18<br>(1.02–1.36) |
| San Luis Potosí  | 2013        | 1.18<br>(1.0–1.37)  |
| San Luis Potosí  | 2014        | 1.18<br>(1.01–1.37) |
| San Luis Potosí  | 2015        | 1.2<br>(1.02–1.41)  |
| San Luis Potosí  | 2016        | 1.18<br>(0.99–1.4)  |
| San Luis Potosí  | 2017        | 1.19<br>(0.99–1.41) |
| Sinaloa          | 1950        | 1.34<br>(1.08–1.62) |
| Sinaloa          | 1951        | 1.35<br>(1.11–1.61) |
| Sinaloa          | 1952        | 1.31<br>(1.09–1.54) |
| Sinaloa          | 1953        | 1.28<br>(1.1–1.5)   |
| Sinaloa          | 1954        | 1.25<br>(1.08–1.46) |
| Sinaloa          | 1955        | 1.23<br>(1.06–1.42) |
| Sinaloa          | 1956        | 1.2<br>(1.04–1.38)  |
| Sinaloa          | 1957        | 1.18<br>(1.03–1.37) |
| Sinaloa          | 1958        | 1.16<br>(1.01–1.35) |
| Sinaloa          | 1959        | 1.14<br>(0.98–1.32) |
| Sinaloa          | 1960        | 1.14<br>(0.98–1.31) |
| Sinaloa          | 1961        | 1.12<br>(0.98–1.28) |
| Sinaloa          | 1962        | 1.1<br>(0.96–1.25)  |
| Sinaloa          | 1963        | 1.09<br>(0.96–1.24) |
| Sinaloa          | 1964        | 1.09<br>(0.96–1.24) |

**Table 15 Ratio of adjusted to unadjusted 5q0 values for scaled locations by year**

| <b>Geography</b> | <b>Year</b> | <b>Ratio</b>        |
|------------------|-------------|---------------------|
| Sinaloa          | 1965        | 1.09<br>(0.96–1.24) |
| Sinaloa          | 1966        | 1.1<br>(0.97–1.24)  |
| Sinaloa          | 1967        | 1.1<br>(0.97–1.23)  |
| Sinaloa          | 1968        | 1.1<br>(0.98–1.24)  |
| Sinaloa          | 1969        | 1.11<br>(0.99–1.25) |
| Sinaloa          | 1970        | 1.12<br>(0.99–1.25) |
| Sinaloa          | 1971        | 1.12<br>(1.0–1.24)  |
| Sinaloa          | 1972        | 1.12<br>(1.01–1.24) |
| Sinaloa          | 1973        | 1.13<br>(1.02–1.24) |
| Sinaloa          | 1974        | 1.12<br>(1.01–1.24) |
| Sinaloa          | 1975        | 1.11<br>(1.0–1.23)  |
| Sinaloa          | 1976        | 1.11<br>(1.0–1.23)  |
| Sinaloa          | 1977        | 1.11<br>(1.0–1.23)  |
| Sinaloa          | 1978        | 1.1<br>(1.0–1.23)   |
| Sinaloa          | 1979        | 1.09<br>(0.99–1.21) |
| Sinaloa          | 1980        | 1.07<br>(0.98–1.18) |
| Sinaloa          | 1981        | 1.06<br>(0.97–1.16) |
| Sinaloa          | 1982        | 1.04<br>(0.95–1.14) |
| Sinaloa          | 1983        | 1.03<br>(0.95–1.12) |
| Sinaloa          | 1984        | 1.04<br>(0.96–1.12) |
| Sinaloa          | 1985        | 1.05<br>(0.97–1.14) |
| Sinaloa          | 1986        | 1.06<br>(0.98–1.16) |
| Sinaloa          | 1987        | 1.05<br>(0.96–1.14) |
| Sinaloa          | 1988        | 1.03<br>(0.95–1.13) |
| Sinaloa          | 1989        | 1.0<br>(0.92–1.08)  |
| Sinaloa          | 1990        | 1.0<br>(0.92–1.08)  |
| Sinaloa          | 1991        | 1.02<br>(0.93–1.12) |
| Sinaloa          | 1992        | 1.03<br>(0.93–1.13) |
| Sinaloa          | 1993        | 1.03<br>(0.93–1.15) |
| Sinaloa          | 1994        | 1.03<br>(0.92–1.15) |
| Sinaloa          | 1995        | 1.02<br>(0.91–1.14) |

**Table 15 Ratio of adjusted to unadjusted 5q0 values for scaled locations by year**

| <b>Geography</b> | <b>Year</b> | <b>Ratio</b>        |
|------------------|-------------|---------------------|
| Sinaloa          | 1996        | 1.02<br>(0.9–1.14)  |
| Sinaloa          | 1997        | 1.02<br>(0.9–1.14)  |
| Sinaloa          | 1998        | 1.03<br>(0.92–1.15) |
| Sinaloa          | 1999        | 1.04<br>(0.93–1.15) |
| Sinaloa          | 2000        | 1.05<br>(0.96–1.14) |
| Sinaloa          | 2001        | 1.06<br>(0.98–1.14) |
| Sinaloa          | 2002        | 1.07<br>(0.99–1.14) |
| Sinaloa          | 2003        | 1.08<br>(1.0–1.16)  |
| Sinaloa          | 2004        | 1.09<br>(1.0–1.19)  |
| Sinaloa          | 2005        | 1.11<br>(1.0–1.24)  |
| Sinaloa          | 2006        | 1.13<br>(1.0–1.27)  |
| Sinaloa          | 2007        | 1.15<br>(1.01–1.3)  |
| Sinaloa          | 2008        | 1.17<br>(1.02–1.34) |
| Sinaloa          | 2009        | 1.19<br>(1.03–1.37) |
| Sinaloa          | 2010        | 1.2<br>(1.04–1.39)  |
| Sinaloa          | 2011        | 1.2<br>(1.04–1.4)   |
| Sinaloa          | 2012        | 1.18<br>(1.02–1.37) |
| Sinaloa          | 2013        | 1.18<br>(1.0–1.37)  |
| Sinaloa          | 2014        | 1.18<br>(1.01–1.37) |
| Sinaloa          | 2015        | 1.2<br>(1.02–1.41)  |
| Sinaloa          | 2016        | 1.18<br>(0.99–1.4)  |
| Sinaloa          | 2017        | 1.19<br>(0.99–1.41) |
| Sonora           | 1950        | 1.35<br>(1.08–1.64) |
| Sonora           | 1951        | 1.35<br>(1.11–1.62) |
| Sonora           | 1952        | 1.31<br>(1.09–1.55) |
| Sonora           | 1953        | 1.29<br>(1.1–1.51)  |
| Sonora           | 1954        | 1.26<br>(1.08–1.47) |
| Sonora           | 1955        | 1.23<br>(1.07–1.43) |
| Sonora           | 1956        | 1.2<br>(1.04–1.39)  |
| Sonora           | 1957        | 1.19<br>(1.03–1.37) |
| Sonora           | 1958        | 1.17<br>(1.01–1.36) |

**Table 15 Ratio of adjusted to unadjusted 5q0 values for scaled locations by year**

| <b>Geography</b> | <b>Year</b> | <b>Ratio</b>        |
|------------------|-------------|---------------------|
| Sonora           | 1959        | 1.14<br>(0.98–1.33) |
| Sonora           | 1960        | 1.14<br>(0.98–1.31) |
| Sonora           | 1961        | 1.13<br>(0.98–1.29) |
| Sonora           | 1962        | 1.11<br>(0.96–1.26) |
| Sonora           | 1963        | 1.1<br>(0.96–1.25)  |
| Sonora           | 1964        | 1.09<br>(0.96–1.25) |
| Sonora           | 1965        | 1.09<br>(0.96–1.24) |
| Sonora           | 1966        | 1.1<br>(0.97–1.24)  |
| Sonora           | 1967        | 1.1<br>(0.97–1.23)  |
| Sonora           | 1968        | 1.11<br>(0.98–1.24) |
| Sonora           | 1969        | 1.11<br>(0.99–1.26) |
| Sonora           | 1970        | 1.12<br>(0.99–1.26) |
| Sonora           | 1971        | 1.12<br>(1.0–1.25)  |
| Sonora           | 1972        | 1.12<br>(1.01–1.24) |
| Sonora           | 1973        | 1.13<br>(1.02–1.25) |
| Sonora           | 1974        | 1.12<br>(1.01–1.24) |
| Sonora           | 1975        | 1.11<br>(1.0–1.23)  |
| Sonora           | 1976        | 1.11<br>(1.0–1.23)  |
| Sonora           | 1977        | 1.11<br>(1.0–1.24)  |
| Sonora           | 1978        | 1.1<br>(1.0–1.23)   |
| Sonora           | 1979        | 1.09<br>(0.99–1.21) |
| Sonora           | 1980        | 1.07<br>(0.98–1.18) |
| Sonora           | 1981        | 1.06<br>(0.97–1.16) |
| Sonora           | 1982        | 1.04<br>(0.95–1.14) |
| Sonora           | 1983        | 1.03<br>(0.95–1.12) |
| Sonora           | 1984        | 1.04<br>(0.96–1.12) |
| Sonora           | 1985        | 1.05<br>(0.97–1.14) |
| Sonora           | 1986        | 1.06<br>(0.98–1.16) |
| Sonora           | 1987        | 1.05<br>(0.96–1.14) |
| Sonora           | 1988        | 1.03<br>(0.95–1.13) |
| Sonora           | 1989        | 1.0<br>(0.92–1.08)  |

**Table 15 Ratio of adjusted to unadjusted 5q0 values for scaled locations by year**

| <b>Geography</b> | <b>Year</b> | <b>Ratio</b>        |
|------------------|-------------|---------------------|
| Sonora           | 1990        | 1.0<br>(0.92–1.08)  |
| Sonora           | 1991        | 1.02<br>(0.93–1.12) |
| Sonora           | 1992        | 1.03<br>(0.93–1.13) |
| Sonora           | 1993        | 1.03<br>(0.93–1.15) |
| Sonora           | 1994        | 1.03<br>(0.92–1.15) |
| Sonora           | 1995        | 1.02<br>(0.91–1.14) |
| Sonora           | 1996        | 1.02<br>(0.9–1.14)  |
| Sonora           | 1997        | 1.02<br>(0.9–1.14)  |
| Sonora           | 1998        | 1.03<br>(0.92–1.15) |
| Sonora           | 1999        | 1.04<br>(0.93–1.15) |
| Sonora           | 2000        | 1.05<br>(0.96–1.14) |
| Sonora           | 2001        | 1.06<br>(0.98–1.14) |
| Sonora           | 2002        | 1.07<br>(0.99–1.14) |
| Sonora           | 2003        | 1.08<br>(1.0–1.16)  |
| Sonora           | 2004        | 1.09<br>(1.0–1.19)  |
| Sonora           | 2005        | 1.11<br>(1.0–1.24)  |
| Sonora           | 2006        | 1.13<br>(1.0–1.27)  |
| Sonora           | 2007        | 1.15<br>(1.01–1.3)  |
| Sonora           | 2008        | 1.17<br>(1.02–1.34) |
| Sonora           | 2009        | 1.19<br>(1.03–1.37) |
| Sonora           | 2010        | 1.2<br>(1.04–1.38)  |
| Sonora           | 2011        | 1.2<br>(1.04–1.39)  |
| Sonora           | 2012        | 1.18<br>(1.02–1.37) |
| Sonora           | 2013        | 1.18<br>(1.0–1.37)  |
| Sonora           | 2014        | 1.18<br>(1.01–1.37) |
| Sonora           | 2015        | 1.2<br>(1.02–1.41)  |
| Sonora           | 2016        | 1.18<br>(0.99–1.4)  |
| Sonora           | 2017        | 1.19<br>(0.99–1.41) |
| Tabasco          | 1950        | 1.34<br>(1.08–1.63) |
| Tabasco          | 1951        | 1.35<br>(1.11–1.62) |
| Tabasco          | 1952        | 1.31<br>(1.09–1.54) |

**Table 15 Ratio of adjusted to unadjusted 5q0 values for scaled locations by year**

| <b>Geography</b> | <b>Year</b> | <b>Ratio</b>        |
|------------------|-------------|---------------------|
| Tabasco          | 1953        | 1.28<br>(1.1–1.5)   |
| Tabasco          | 1954        | 1.25<br>(1.08–1.46) |
| Tabasco          | 1955        | 1.23<br>(1.06–1.42) |
| Tabasco          | 1956        | 1.2<br>(1.04–1.38)  |
| Tabasco          | 1957        | 1.18<br>(1.03–1.37) |
| Tabasco          | 1958        | 1.17<br>(1.01–1.35) |
| Tabasco          | 1959        | 1.14<br>(0.98–1.32) |
| Tabasco          | 1960        | 1.14<br>(0.98–1.31) |
| Tabasco          | 1961        | 1.13<br>(0.98–1.28) |
| Tabasco          | 1962        | 1.1<br>(0.96–1.26)  |
| Tabasco          | 1963        | 1.09<br>(0.96–1.24) |
| Tabasco          | 1964        | 1.09<br>(0.96–1.24) |
| Tabasco          | 1965        | 1.09<br>(0.96–1.24) |
| Tabasco          | 1966        | 1.1<br>(0.97–1.24)  |
| Tabasco          | 1967        | 1.1<br>(0.97–1.23)  |
| Tabasco          | 1968        | 1.1<br>(0.98–1.24)  |
| Tabasco          | 1969        | 1.11<br>(0.99–1.25) |
| Tabasco          | 1970        | 1.12<br>(0.99–1.25) |
| Tabasco          | 1971        | 1.12<br>(1.0–1.24)  |
| Tabasco          | 1972        | 1.12<br>(1.01–1.24) |
| Tabasco          | 1973        | 1.13<br>(1.02–1.24) |
| Tabasco          | 1974        | 1.12<br>(1.01–1.24) |
| Tabasco          | 1975        | 1.11<br>(1.0–1.23)  |
| Tabasco          | 1976        | 1.11<br>(1.0–1.23)  |
| Tabasco          | 1977        | 1.11<br>(1.0–1.23)  |
| Tabasco          | 1978        | 1.1<br>(1.0–1.23)   |
| Tabasco          | 1979        | 1.09<br>(0.99–1.21) |
| Tabasco          | 1980        | 1.07<br>(0.98–1.18) |
| Tabasco          | 1981        | 1.06<br>(0.97–1.16) |
| Tabasco          | 1982        | 1.04<br>(0.95–1.14) |
| Tabasco          | 1983        | 1.03<br>(0.95–1.12) |



**Table 15 Ratio of adjusted to unadjusted 5q0 values for scaled locations by year**

| <b>Geography</b> | <b>Year</b> | <b>Ratio</b>        |
|------------------|-------------|---------------------|
| Tabasco          | 1984        | 1.04<br>(0.96–1.12) |
| Tabasco          | 1985        | 1.05<br>(0.97–1.14) |
| Tabasco          | 1986        | 1.06<br>(0.98–1.16) |
| Tabasco          | 1987        | 1.05<br>(0.96–1.14) |
| Tabasco          | 1988        | 1.03<br>(0.95–1.13) |
| Tabasco          | 1989        | 1.0<br>(0.92–1.08)  |
| Tabasco          | 1990        | 1.0<br>(0.92–1.08)  |
| Tabasco          | 1991        | 1.02<br>(0.93–1.12) |
| Tabasco          | 1992        | 1.03<br>(0.93–1.13) |
| Tabasco          | 1993        | 1.03<br>(0.93–1.15) |
| Tabasco          | 1994        | 1.03<br>(0.92–1.15) |
| Tabasco          | 1995        | 1.02<br>(0.91–1.14) |
| Tabasco          | 1996        | 1.02<br>(0.9–1.14)  |
| Tabasco          | 1997        | 1.02<br>(0.9–1.14)  |
| Tabasco          | 1998        | 1.03<br>(0.92–1.15) |
| Tabasco          | 1999        | 1.04<br>(0.93–1.15) |
| Tabasco          | 2000        | 1.05<br>(0.96–1.14) |
| Tabasco          | 2001        | 1.06<br>(0.98–1.14) |
| Tabasco          | 2002        | 1.07<br>(0.99–1.14) |
| Tabasco          | 2003        | 1.08<br>(1.0–1.16)  |
| Tabasco          | 2004        | 1.09<br>(1.0–1.19)  |
| Tabasco          | 2005        | 1.11<br>(1.0–1.24)  |
| Tabasco          | 2006        | 1.13<br>(1.0–1.27)  |
| Tabasco          | 2007        | 1.15<br>(1.01–1.3)  |
| Tabasco          | 2008        | 1.17<br>(1.02–1.34) |
| Tabasco          | 2009        | 1.19<br>(1.03–1.37) |
| Tabasco          | 2010        | 1.2<br>(1.04–1.38)  |
| Tabasco          | 2011        | 1.2<br>(1.04–1.39)  |
| Tabasco          | 2012        | 1.18<br>(1.02–1.36) |
| Tabasco          | 2013        | 1.17<br>(1.0–1.36)  |
| Tabasco          | 2014        | 1.18<br>(1.01–1.37) |

**Table 15 Ratio of adjusted to unadjusted 5q0 values for scaled locations by year**

| <b>Geography</b> | <b>Year</b> | <b>Ratio</b>        |
|------------------|-------------|---------------------|
| Tabasco          | 2015        | 1.2<br>(1.02–1.41)  |
| Tabasco          | 2016        | 1.18<br>(0.99–1.4)  |
| Tabasco          | 2017        | 1.19<br>(0.99–1.41) |
| Tamaulipas       | 1950        | 1.35<br>(1.08–1.63) |
| Tamaulipas       | 1951        | 1.35<br>(1.11–1.62) |
| Tamaulipas       | 1952        | 1.31<br>(1.09–1.55) |
| Tamaulipas       | 1953        | 1.29<br>(1.1–1.51)  |
| Tamaulipas       | 1954        | 1.25<br>(1.08–1.47) |
| Tamaulipas       | 1955        | 1.23<br>(1.07–1.42) |
| Tamaulipas       | 1956        | 1.2<br>(1.04–1.38)  |
| Tamaulipas       | 1957        | 1.19<br>(1.03–1.37) |
| Tamaulipas       | 1958        | 1.17<br>(1.01–1.35) |
| Tamaulipas       | 1959        | 1.14<br>(0.98–1.33) |
| Tamaulipas       | 1960        | 1.14<br>(0.98–1.31) |
| Tamaulipas       | 1961        | 1.13<br>(0.98–1.29) |
| Tamaulipas       | 1962        | 1.1<br>(0.96–1.26)  |
| Tamaulipas       | 1963        | 1.09<br>(0.96–1.25) |
| Tamaulipas       | 1964        | 1.09<br>(0.96–1.25) |
| Tamaulipas       | 1965        | 1.09<br>(0.96–1.24) |
| Tamaulipas       | 1966        | 1.1<br>(0.97–1.24)  |
| Tamaulipas       | 1967        | 1.1<br>(0.97–1.23)  |
| Tamaulipas       | 1968        | 1.1<br>(0.98–1.24)  |
| Tamaulipas       | 1969        | 1.11<br>(0.99–1.26) |
| Tamaulipas       | 1970        | 1.12<br>(0.99–1.25) |
| Tamaulipas       | 1971        | 1.12<br>(1.0–1.25)  |
| Tamaulipas       | 1972        | 1.12<br>(1.01–1.25) |
| Tamaulipas       | 1973        | 1.13<br>(1.02–1.25) |
| Tamaulipas       | 1974        | 1.12<br>(1.01–1.24) |
| Tamaulipas       | 1975        | 1.11<br>(1.0–1.23)  |
| Tamaulipas       | 1976        | 1.11<br>(1.0–1.23)  |
| Tamaulipas       | 1977        | 1.11<br>(1.0–1.24)  |

**Table 15 Ratio of adjusted to unadjusted 5q0 values for scaled locations by year**

| <b>Geography</b> | <b>Year</b> | <b>Ratio</b>        |
|------------------|-------------|---------------------|
| Tamaulipas       | 1978        | 1.1<br>(1.0–1.23)   |
| Tamaulipas       | 1979        | 1.09<br>(0.99–1.21) |
| Tamaulipas       | 1980        | 1.07<br>(0.98–1.18) |
| Tamaulipas       | 1981        | 1.06<br>(0.97–1.16) |
| Tamaulipas       | 1982        | 1.04<br>(0.95–1.14) |
| Tamaulipas       | 1983        | 1.03<br>(0.95–1.12) |
| Tamaulipas       | 1984        | 1.04<br>(0.96–1.12) |
| Tamaulipas       | 1985        | 1.05<br>(0.97–1.14) |
| Tamaulipas       | 1986        | 1.06<br>(0.98–1.16) |
| Tamaulipas       | 1987        | 1.05<br>(0.96–1.14) |
| Tamaulipas       | 1988        | 1.03<br>(0.95–1.13) |
| Tamaulipas       | 1989        | 1.0<br>(0.92–1.08)  |
| Tamaulipas       | 1990        | 1.0<br>(0.92–1.08)  |
| Tamaulipas       | 1991        | 1.02<br>(0.93–1.12) |
| Tamaulipas       | 1992        | 1.03<br>(0.93–1.13) |
| Tamaulipas       | 1993        | 1.03<br>(0.93–1.15) |
| Tamaulipas       | 1994        | 1.03<br>(0.92–1.15) |
| Tamaulipas       | 1995        | 1.02<br>(0.91–1.14) |
| Tamaulipas       | 1996        | 1.02<br>(0.9–1.14)  |
| Tamaulipas       | 1997        | 1.02<br>(0.9–1.14)  |
| Tamaulipas       | 1998        | 1.03<br>(0.92–1.15) |
| Tamaulipas       | 1999        | 1.04<br>(0.93–1.15) |
| Tamaulipas       | 2000        | 1.05<br>(0.96–1.14) |
| Tamaulipas       | 2001        | 1.06<br>(0.98–1.14) |
| Tamaulipas       | 2002        | 1.07<br>(0.99–1.14) |
| Tamaulipas       | 2003        | 1.08<br>(1.0–1.16)  |
| Tamaulipas       | 2004        | 1.09<br>(1.0–1.19)  |
| Tamaulipas       | 2005        | 1.11<br>(1.0–1.24)  |
| Tamaulipas       | 2006        | 1.13<br>(1.0–1.27)  |
| Tamaulipas       | 2007        | 1.15<br>(1.01–1.3)  |
| Tamaulipas       | 2008        | 1.17<br>(1.02–1.34) |

**Table 15 Ratio of adjusted to unadjusted 5q0 values for scaled locations by year**

| <b>Geography</b> | <b>Year</b> | <b>Ratio</b>        |
|------------------|-------------|---------------------|
| Tamaulipas       | 2009        | 1.19<br>(1.03–1.37) |
| Tamaulipas       | 2010        | 1.2<br>(1.04–1.38)  |
| Tamaulipas       | 2011        | 1.2<br>(1.04–1.39)  |
| Tamaulipas       | 2012        | 1.18<br>(1.02–1.37) |
| Tamaulipas       | 2013        | 1.18<br>(1.0–1.37)  |
| Tamaulipas       | 2014        | 1.18<br>(1.01–1.37) |
| Tamaulipas       | 2015        | 1.2<br>(1.02–1.41)  |
| Tamaulipas       | 2016        | 1.18<br>(0.99–1.4)  |
| Tamaulipas       | 2017        | 1.19<br>(0.99–1.41) |
| Tlaxcala         | 1950        | 1.33<br>(1.08–1.6)  |
| Tlaxcala         | 1951        | 1.33<br>(1.11–1.59) |
| Tlaxcala         | 1952        | 1.3<br>(1.09–1.52)  |
| Tlaxcala         | 1953        | 1.27<br>(1.1–1.48)  |
| Tlaxcala         | 1954        | 1.24<br>(1.08–1.45) |
| Tlaxcala         | 1955        | 1.22<br>(1.06–1.4)  |
| Tlaxcala         | 1956        | 1.19<br>(1.04–1.37) |
| Tlaxcala         | 1957        | 1.18<br>(1.03–1.36) |
| Tlaxcala         | 1958        | 1.16<br>(1.01–1.34) |
| Tlaxcala         | 1959        | 1.14<br>(0.98–1.32) |
| Tlaxcala         | 1960        | 1.14<br>(0.98–1.3)  |
| Tlaxcala         | 1961        | 1.12<br>(0.98–1.28) |
| Tlaxcala         | 1962        | 1.1<br>(0.96–1.25)  |
| Tlaxcala         | 1963        | 1.09<br>(0.96–1.24) |
| Tlaxcala         | 1964        | 1.09<br>(0.96–1.24) |
| Tlaxcala         | 1965        | 1.09<br>(0.96–1.23) |
| Tlaxcala         | 1966        | 1.1<br>(0.97–1.23)  |
| Tlaxcala         | 1967        | 1.1<br>(0.97–1.22)  |
| Tlaxcala         | 1968        | 1.1<br>(0.98–1.24)  |
| Tlaxcala         | 1969        | 1.11<br>(0.99–1.25) |
| Tlaxcala         | 1970        | 1.12<br>(0.99–1.25) |
| Tlaxcala         | 1971        | 1.11<br>(1.0–1.24)  |

**Table 15 Ratio of adjusted to unadjusted 5q0 values for scaled locations by year**

| <b>Geography</b> | <b>Year</b> | <b>Ratio</b>        |
|------------------|-------------|---------------------|
| Tlaxcala         | 1972        | 1.12<br>(1.01–1.24) |
| Tlaxcala         | 1973        | 1.13<br>(1.02–1.24) |
| Tlaxcala         | 1974        | 1.11<br>(1.01–1.23) |
| Tlaxcala         | 1975        | 1.11<br>(1.0–1.23)  |
| Tlaxcala         | 1976        | 1.11<br>(1.0–1.23)  |
| Tlaxcala         | 1977        | 1.11<br>(1.0–1.23)  |
| Tlaxcala         | 1978        | 1.1<br>(1.0–1.23)   |
| Tlaxcala         | 1979        | 1.09<br>(0.99–1.21) |
| Tlaxcala         | 1980        | 1.07<br>(0.98–1.18) |
| Tlaxcala         | 1981        | 1.06<br>(0.97–1.16) |
| Tlaxcala         | 1982        | 1.04<br>(0.95–1.14) |
| Tlaxcala         | 1983        | 1.03<br>(0.95–1.12) |
| Tlaxcala         | 1984        | 1.04<br>(0.96–1.12) |
| Tlaxcala         | 1985        | 1.05<br>(0.97–1.14) |
| Tlaxcala         | 1986        | 1.06<br>(0.98–1.16) |
| Tlaxcala         | 1987        | 1.05<br>(0.96–1.14) |
| Tlaxcala         | 1988        | 1.03<br>(0.95–1.13) |
| Tlaxcala         | 1989        | 1.0<br>(0.92–1.08)  |
| Tlaxcala         | 1990        | 1.0<br>(0.92–1.08)  |
| Tlaxcala         | 1991        | 1.02<br>(0.93–1.12) |
| Tlaxcala         | 1992        | 1.03<br>(0.93–1.13) |
| Tlaxcala         | 1993        | 1.03<br>(0.93–1.15) |
| Tlaxcala         | 1994        | 1.03<br>(0.92–1.15) |
| Tlaxcala         | 1995        | 1.02<br>(0.91–1.14) |
| Tlaxcala         | 1996        | 1.02<br>(0.9–1.14)  |
| Tlaxcala         | 1997        | 1.02<br>(0.9–1.14)  |
| Tlaxcala         | 1998        | 1.03<br>(0.92–1.15) |
| Tlaxcala         | 1999        | 1.04<br>(0.93–1.15) |
| Tlaxcala         | 2000        | 1.05<br>(0.96–1.14) |
| Tlaxcala         | 2001        | 1.06<br>(0.98–1.14) |
| Tlaxcala         | 2002        | 1.07<br>(0.99–1.14) |

**Table 15 Ratio of adjusted to unadjusted 5q0 values for scaled locations by year**

| <b>Geography</b>                | <b>Year</b> | <b>Ratio</b>        |
|---------------------------------|-------------|---------------------|
| Tlaxcala                        | 2003        | 1.08<br>(1.0–1.16)  |
| Tlaxcala                        | 2004        | 1.09<br>(1.0–1.19)  |
| Tlaxcala                        | 2005        | 1.11<br>(1.0–1.24)  |
| Tlaxcala                        | 2006        | 1.13<br>(1.0–1.27)  |
| Tlaxcala                        | 2007        | 1.15<br>(1.01–1.3)  |
| Tlaxcala                        | 2008        | 1.17<br>(1.02–1.34) |
| Tlaxcala                        | 2009        | 1.19<br>(1.03–1.37) |
| Tlaxcala                        | 2010        | 1.2<br>(1.04–1.38)  |
| Tlaxcala                        | 2011        | 1.2<br>(1.04–1.39)  |
| Tlaxcala                        | 2012        | 1.18<br>(1.02–1.36) |
| Tlaxcala                        | 2013        | 1.18<br>(1.0–1.37)  |
| Tlaxcala                        | 2014        | 1.18<br>(1.01–1.37) |
| Tlaxcala                        | 2015        | 1.2<br>(1.02–1.41)  |
| Tlaxcala                        | 2016        | 1.18<br>(0.99–1.4)  |
| Tlaxcala                        | 2017        | 1.19<br>(0.99–1.41) |
| Veracruz de Ignacio de la Llave | 1950        | 1.34<br>(1.08–1.61) |
| Veracruz de Ignacio de la Llave | 1951        | 1.34<br>(1.11–1.6)  |
| Veracruz de Ignacio de la Llave | 1952        | 1.3<br>(1.09–1.53)  |
| Veracruz de Ignacio de la Llave | 1953        | 1.28<br>(1.1–1.49)  |
| Veracruz de Ignacio de la Llave | 1954        | 1.25<br>(1.08–1.46) |
| Veracruz de Ignacio de la Llave | 1955        | 1.22<br>(1.06–1.41) |
| Veracruz de Ignacio de la Llave | 1956        | 1.2<br>(1.04–1.37)  |
| Veracruz de Ignacio de la Llave | 1957        | 1.18<br>(1.03–1.36) |
| Veracruz de Ignacio de la Llave | 1958        | 1.16<br>(1.01–1.34) |
| Veracruz de Ignacio de la Llave | 1959        | 1.14<br>(0.98–1.32) |
| Veracruz de Ignacio de la Llave | 1960        | 1.14<br>(0.98–1.3)  |
| Veracruz de Ignacio de la Llave | 1961        | 1.12<br>(0.98–1.28) |
| Veracruz de Ignacio de la Llave | 1962        | 1.1<br>(0.96–1.25)  |
| Veracruz de Ignacio de la Llave | 1963        | 1.09<br>(0.96–1.24) |
| Veracruz de Ignacio de la Llave | 1964        | 1.09<br>(0.96–1.24) |
| Veracruz de Ignacio de la Llave | 1965        | 1.09<br>(0.96–1.23) |

**Table 15 Ratio of adjusted to unadjusted 5q0 values for scaled locations by year**

| <b>Geography</b>                | <b>Year</b> | <b>Ratio</b>        |
|---------------------------------|-------------|---------------------|
| Veracruz de Ignacio de la Llave | 1966        | 1.1<br>(0.97–1.23)  |
| Veracruz de Ignacio de la Llave | 1967        | 1.1<br>(0.97–1.23)  |
| Veracruz de Ignacio de la Llave | 1968        | 1.1<br>(0.98–1.24)  |
| Veracruz de Ignacio de la Llave | 1969        | 1.11<br>(0.99–1.25) |
| Veracruz de Ignacio de la Llave | 1970        | 1.12<br>(0.99–1.25) |
| Veracruz de Ignacio de la Llave | 1971        | 1.11<br>(1.0–1.24)  |
| Veracruz de Ignacio de la Llave | 1972        | 1.12<br>(1.01–1.24) |
| Veracruz de Ignacio de la Llave | 1973        | 1.13<br>(1.02–1.24) |
| Veracruz de Ignacio de la Llave | 1974        | 1.11<br>(1.01–1.24) |
| Veracruz de Ignacio de la Llave | 1975        | 1.11<br>(1.0–1.23)  |
| Veracruz de Ignacio de la Llave | 1976        | 1.11<br>(1.0–1.23)  |
| Veracruz de Ignacio de la Llave | 1977        | 1.11<br>(1.0–1.23)  |
| Veracruz de Ignacio de la Llave | 1978        | 1.1<br>(1.0–1.23)   |
| Veracruz de Ignacio de la Llave | 1979        | 1.09<br>(0.99–1.21) |
| Veracruz de Ignacio de la Llave | 1980        | 1.07<br>(0.98–1.18) |
| Veracruz de Ignacio de la Llave | 1981        | 1.06<br>(0.97–1.16) |
| Veracruz de Ignacio de la Llave | 1982        | 1.04<br>(0.95–1.14) |
| Veracruz de Ignacio de la Llave | 1983        | 1.03<br>(0.95–1.12) |
| Veracruz de Ignacio de la Llave | 1984        | 1.04<br>(0.96–1.12) |
| Veracruz de Ignacio de la Llave | 1985        | 1.05<br>(0.97–1.14) |
| Veracruz de Ignacio de la Llave | 1986        | 1.06<br>(0.98–1.16) |
| Veracruz de Ignacio de la Llave | 1987        | 1.05<br>(0.96–1.14) |
| Veracruz de Ignacio de la Llave | 1988        | 1.03<br>(0.95–1.13) |
| Veracruz de Ignacio de la Llave | 1989        | 1.0<br>(0.92–1.08)  |
| Veracruz de Ignacio de la Llave | 1990        | 1.0<br>(0.92–1.08)  |
| Veracruz de Ignacio de la Llave | 1991        | 1.02<br>(0.93–1.12) |
| Veracruz de Ignacio de la Llave | 1992        | 1.03<br>(0.93–1.13) |
| Veracruz de Ignacio de la Llave | 1993        | 1.03<br>(0.93–1.15) |
| Veracruz de Ignacio de la Llave | 1994        | 1.03<br>(0.92–1.15) |
| Veracruz de Ignacio de la Llave | 1995        | 1.02<br>(0.91–1.14) |
| Veracruz de Ignacio de la Llave | 1996        | 1.02<br>(0.9–1.14)  |

**Table 15 Ratio of adjusted to unadjusted 5q0 values for scaled locations by year**

| <b>Geography</b>                | <b>Year</b> | <b>Ratio</b>        |
|---------------------------------|-------------|---------------------|
| Veracruz de Ignacio de la Llave | 1997        | 1.02<br>(0.9–1.14)  |
| Veracruz de Ignacio de la Llave | 1998        | 1.03<br>(0.92–1.15) |
| Veracruz de Ignacio de la Llave | 1999        | 1.04<br>(0.93–1.15) |
| Veracruz de Ignacio de la Llave | 2000        | 1.05<br>(0.96–1.14) |
| Veracruz de Ignacio de la Llave | 2001        | 1.06<br>(0.98–1.14) |
| Veracruz de Ignacio de la Llave | 2002        | 1.07<br>(0.99–1.14) |
| Veracruz de Ignacio de la Llave | 2003        | 1.08<br>(1.0–1.16)  |
| Veracruz de Ignacio de la Llave | 2004        | 1.09<br>(1.0–1.19)  |
| Veracruz de Ignacio de la Llave | 2005        | 1.11<br>(1.0–1.24)  |
| Veracruz de Ignacio de la Llave | 2006        | 1.13<br>(1.0–1.27)  |
| Veracruz de Ignacio de la Llave | 2007        | 1.15<br>(1.01–1.3)  |
| Veracruz de Ignacio de la Llave | 2008        | 1.17<br>(1.02–1.34) |
| Veracruz de Ignacio de la Llave | 2009        | 1.19<br>(1.03–1.37) |
| Veracruz de Ignacio de la Llave | 2010        | 1.2<br>(1.04–1.38)  |
| Veracruz de Ignacio de la Llave | 2011        | 1.2<br>(1.04–1.39)  |
| Veracruz de Ignacio de la Llave | 2012        | 1.18<br>(1.02–1.36) |
| Veracruz de Ignacio de la Llave | 2013        | 1.18<br>(1.0–1.37)  |
| Veracruz de Ignacio de la Llave | 2014        | 1.18<br>(1.01–1.37) |
| Veracruz de Ignacio de la Llave | 2015        | 1.2<br>(1.02–1.41)  |
| Veracruz de Ignacio de la Llave | 2016        | 1.18<br>(0.99–1.4)  |
| Veracruz de Ignacio de la Llave | 2017        | 1.19<br>(0.99–1.41) |
| Yucatán                         | 1950        | 1.35<br>(1.08–1.63) |
| Yucatán                         | 1951        | 1.35<br>(1.11–1.62) |
| Yucatán                         | 1952        | 1.31<br>(1.09–1.55) |
| Yucatán                         | 1953        | 1.29<br>(1.1–1.51)  |
| Yucatán                         | 1954        | 1.25<br>(1.08–1.47) |
| Yucatán                         | 1955        | 1.23<br>(1.07–1.43) |
| Yucatán                         | 1956        | 1.2<br>(1.04–1.38)  |
| Yucatán                         | 1957        | 1.19<br>(1.03–1.37) |
| Yucatán                         | 1958        | 1.17<br>(1.01–1.35) |
| Yucatán                         | 1959        | 1.14<br>(0.98–1.33) |



**Table 15 Ratio of adjusted to unadjusted 5q0 values for scaled locations by year**

| <b>Geography</b> | <b>Year</b> | <b>Ratio</b>        |
|------------------|-------------|---------------------|
| Yucatán          | 1960        | 1.14<br>(0.98–1.31) |
| Yucatán          | 1961        | 1.13<br>(0.98–1.29) |
| Yucatán          | 1962        | 1.1<br>(0.96–1.26)  |
| Yucatán          | 1963        | 1.09<br>(0.96–1.24) |
| Yucatán          | 1964        | 1.09<br>(0.96–1.25) |
| Yucatán          | 1965        | 1.09<br>(0.96–1.24) |
| Yucatán          | 1966        | 1.1<br>(0.97–1.24)  |
| Yucatán          | 1967        | 1.1<br>(0.97–1.23)  |
| Yucatán          | 1968        | 1.1<br>(0.98–1.24)  |
| Yucatán          | 1969        | 1.11<br>(0.99–1.26) |
| Yucatán          | 1970        | 1.12<br>(0.99–1.25) |
| Yucatán          | 1971        | 1.12<br>(1.0–1.25)  |
| Yucatán          | 1972        | 1.12<br>(1.01–1.24) |
| Yucatán          | 1973        | 1.13<br>(1.02–1.25) |
| Yucatán          | 1974        | 1.12<br>(1.01–1.24) |
| Yucatán          | 1975        | 1.11<br>(1.0–1.23)  |
| Yucatán          | 1976        | 1.11<br>(1.0–1.23)  |
| Yucatán          | 1977        | 1.11<br>(1.0–1.24)  |
| Yucatán          | 1978        | 1.1<br>(1.0–1.23)   |
| Yucatán          | 1979        | 1.09<br>(0.99–1.21) |
| Yucatán          | 1980        | 1.07<br>(0.98–1.18) |
| Yucatán          | 1981        | 1.06<br>(0.97–1.16) |
| Yucatán          | 1982        | 1.04<br>(0.95–1.14) |
| Yucatán          | 1983        | 1.03<br>(0.95–1.12) |
| Yucatán          | 1984        | 1.04<br>(0.96–1.12) |
| Yucatán          | 1985        | 1.05<br>(0.97–1.14) |
| Yucatán          | 1986        | 1.06<br>(0.98–1.16) |
| Yucatán          | 1987        | 1.05<br>(0.96–1.14) |
| Yucatán          | 1988        | 1.03<br>(0.95–1.13) |
| Yucatán          | 1989        | 1.0<br>(0.92–1.08)  |
| Yucatán          | 1990        | 1.0<br>(0.92–1.08)  |

**Table 15 Ratio of adjusted to unadjusted 5q0 values for scaled locations by year**

| <b>Geography</b> | <b>Year</b> | <b>Ratio</b>        |
|------------------|-------------|---------------------|
| Yucatán          | 1991        | 1.02<br>(0.93–1.12) |
| Yucatán          | 1992        | 1.03<br>(0.93–1.13) |
| Yucatán          | 1993        | 1.03<br>(0.93–1.15) |
| Yucatán          | 1994        | 1.03<br>(0.92–1.15) |
| Yucatán          | 1995        | 1.02<br>(0.91–1.14) |
| Yucatán          | 1996        | 1.02<br>(0.9–1.14)  |
| Yucatán          | 1997        | 1.02<br>(0.9–1.14)  |
| Yucatán          | 1998        | 1.03<br>(0.92–1.15) |
| Yucatán          | 1999        | 1.04<br>(0.93–1.15) |
| Yucatán          | 2000        | 1.05<br>(0.96–1.14) |
| Yucatán          | 2001        | 1.06<br>(0.98–1.14) |
| Yucatán          | 2002        | 1.07<br>(0.99–1.14) |
| Yucatán          | 2003        | 1.08<br>(1.0–1.16)  |
| Yucatán          | 2004        | 1.09<br>(1.0–1.19)  |
| Yucatán          | 2005        | 1.11<br>(1.0–1.24)  |
| Yucatán          | 2006        | 1.13<br>(1.0–1.27)  |
| Yucatán          | 2007        | 1.15<br>(1.01–1.3)  |
| Yucatán          | 2008        | 1.17<br>(1.02–1.34) |
| Yucatán          | 2009        | 1.19<br>(1.03–1.37) |
| Yucatán          | 2010        | 1.2<br>(1.04–1.38)  |
| Yucatán          | 2011        | 1.2<br>(1.04–1.39)  |
| Yucatán          | 2012        | 1.18<br>(1.02–1.37) |
| Yucatán          | 2013        | 1.18<br>(1.0–1.37)  |
| Yucatán          | 2014        | 1.18<br>(1.01–1.37) |
| Yucatán          | 2015        | 1.2<br>(1.02–1.41)  |
| Yucatán          | 2016        | 1.18<br>(0.99–1.4)  |
| Yucatán          | 2017        | 1.19<br>(0.99–1.41) |
| Zacatecas        | 1950        | 1.34<br>(1.08–1.62) |
| Zacatecas        | 1951        | 1.34<br>(1.11–1.61) |
| Zacatecas        | 1952        | 1.3<br>(1.09–1.54)  |
| Zacatecas        | 1953        | 1.28<br>(1.1–1.5)   |

**Table 15 Ratio of adjusted to unadjusted 5q0 values for scaled locations by year**

| <b>Geography</b> | <b>Year</b> | <b>Ratio</b>        |
|------------------|-------------|---------------------|
| Zacatecas        | 1954        | 1.25<br>(1.08–1.46) |
| Zacatecas        | 1955        | 1.23<br>(1.06–1.42) |
| Zacatecas        | 1956        | 1.2<br>(1.04–1.38)  |
| Zacatecas        | 1957        | 1.18<br>(1.03–1.36) |
| Zacatecas        | 1958        | 1.16<br>(1.01–1.35) |
| Zacatecas        | 1959        | 1.14<br>(0.98–1.32) |
| Zacatecas        | 1960        | 1.14<br>(0.98–1.31) |
| Zacatecas        | 1961        | 1.12<br>(0.98–1.28) |
| Zacatecas        | 1962        | 1.1<br>(0.96–1.25)  |
| Zacatecas        | 1963        | 1.09<br>(0.96–1.24) |
| Zacatecas        | 1964        | 1.09<br>(0.96–1.24) |
| Zacatecas        | 1965        | 1.09<br>(0.96–1.23) |
| Zacatecas        | 1966        | 1.1<br>(0.97–1.24)  |
| Zacatecas        | 1967        | 1.1<br>(0.97–1.23)  |
| Zacatecas        | 1968        | 1.1<br>(0.98–1.24)  |
| Zacatecas        | 1969        | 1.11<br>(0.99–1.25) |
| Zacatecas        | 1970        | 1.12<br>(0.99–1.25) |
| Zacatecas        | 1971        | 1.12<br>(1.0–1.24)  |
| Zacatecas        | 1972        | 1.12<br>(1.01–1.24) |
| Zacatecas        | 1973        | 1.13<br>(1.02–1.24) |
| Zacatecas        | 1974        | 1.12<br>(1.01–1.24) |
| Zacatecas        | 1975        | 1.11<br>(1.0–1.23)  |
| Zacatecas        | 1976        | 1.11<br>(1.0–1.23)  |
| Zacatecas        | 1977        | 1.11<br>(1.0–1.23)  |
| Zacatecas        | 1978        | 1.1<br>(1.0–1.23)   |
| Zacatecas        | 1979        | 1.09<br>(0.99–1.21) |
| Zacatecas        | 1980        | 1.07<br>(0.98–1.18) |
| Zacatecas        | 1981        | 1.06<br>(0.97–1.16) |
| Zacatecas        | 1982        | 1.04<br>(0.95–1.14) |
| Zacatecas        | 1983        | 1.03<br>(0.95–1.12) |
| Zacatecas        | 1984        | 1.04<br>(0.96–1.12) |

**Table 15 Ratio of adjusted to unadjusted 5q0 values for scaled locations by year**

| <b>Geography</b> | <b>Year</b> | <b>Ratio</b>        |
|------------------|-------------|---------------------|
| Zacatecas        | 1985        | 1.05<br>(0.97–1.14) |
| Zacatecas        | 1986        | 1.06<br>(0.98–1.16) |
| Zacatecas        | 1987        | 1.05<br>(0.96–1.14) |
| Zacatecas        | 1988        | 1.03<br>(0.95–1.13) |
| Zacatecas        | 1989        | 1.0<br>(0.92–1.08)  |
| Zacatecas        | 1990        | 1.0<br>(0.92–1.08)  |
| Zacatecas        | 1991        | 1.02<br>(0.93–1.12) |
| Zacatecas        | 1992        | 1.03<br>(0.93–1.13) |
| Zacatecas        | 1993        | 1.03<br>(0.93–1.15) |
| Zacatecas        | 1994        | 1.03<br>(0.92–1.15) |
| Zacatecas        | 1995        | 1.02<br>(0.91–1.14) |
| Zacatecas        | 1996        | 1.02<br>(0.9–1.14)  |
| Zacatecas        | 1997        | 1.02<br>(0.9–1.14)  |
| Zacatecas        | 1998        | 1.03<br>(0.92–1.15) |
| Zacatecas        | 1999        | 1.04<br>(0.93–1.15) |
| Zacatecas        | 2000        | 1.05<br>(0.96–1.14) |
| Zacatecas        | 2001        | 1.06<br>(0.98–1.14) |
| Zacatecas        | 2002        | 1.07<br>(0.99–1.14) |
| Zacatecas        | 2003        | 1.08<br>(1.0–1.16)  |
| Zacatecas        | 2004        | 1.09<br>(1.0–1.19)  |
| Zacatecas        | 2005        | 1.11<br>(1.0–1.24)  |
| Zacatecas        | 2006        | 1.13<br>(1.0–1.27)  |
| Zacatecas        | 2007        | 1.15<br>(1.01–1.3)  |
| Zacatecas        | 2008        | 1.17<br>(1.02–1.34) |
| Zacatecas        | 2009        | 1.19<br>(1.03–1.37) |
| Zacatecas        | 2010        | 1.2<br>(1.04–1.38)  |
| Zacatecas        | 2011        | 1.2<br>(1.04–1.39)  |
| Zacatecas        | 2012        | 1.18<br>(1.02–1.37) |
| Zacatecas        | 2013        | 1.18<br>(1.0–1.37)  |
| Zacatecas        | 2014        | 1.18<br>(1.01–1.37) |
| Zacatecas        | 2015        | 1.2<br>(1.02–1.41)  |

**Table 15 Ratio of adjusted to unadjusted 5q0 values for scaled locations by year**

| <b>Geography</b> | <b>Year</b> | <b>Ratio</b>        |
|------------------|-------------|---------------------|
| Zacatecas        | 2016        | 1.18<br>(0.99–1.4)  |
| Zacatecas        | 2017        | 1.19<br>(0.99–1.41) |
| Brazil           | 1950        | 1.0<br>(1.0–1.0)    |
| Brazil           | 1951        | 1.0<br>(1.0–1.0)    |
| Brazil           | 1952        | 1.0<br>(1.0–1.0)    |
| Brazil           | 1953        | 1.0<br>(1.0–1.0)    |
| Brazil           | 1954        | 1.0<br>(1.0–1.0)    |
| Brazil           | 1955        | 1.0<br>(1.0–1.0)    |
| Brazil           | 1956        | 1.0<br>(1.0–1.0)    |
| Brazil           | 1957        | 1.0<br>(1.0–1.0)    |
| Brazil           | 1958        | 1.0<br>(1.0–1.0)    |
| Brazil           | 1959        | 1.0<br>(1.0–1.0)    |
| Brazil           | 1960        | 1.0<br>(1.0–1.0)    |
| Brazil           | 1961        | 1.0<br>(1.0–1.0)    |
| Brazil           | 1962        | 1.0<br>(1.0–1.0)    |
| Brazil           | 1963        | 1.0<br>(1.0–1.0)    |
| Brazil           | 1964        | 1.0<br>(1.0–1.0)    |
| Brazil           | 1965        | 1.0<br>(1.0–1.0)    |
| Brazil           | 1966        | 1.0<br>(1.0–1.0)    |
| Brazil           | 1967        | 1.0<br>(1.0–1.0)    |
| Brazil           | 1968        | 1.0<br>(1.0–1.0)    |
| Brazil           | 1969        | 1.0<br>(1.0–1.0)    |
| Brazil           | 1970        | 1.0<br>(1.0–1.0)    |
| Brazil           | 1971        | 1.0<br>(1.0–1.0)    |
| Brazil           | 1972        | 1.0<br>(1.0–1.0)    |
| Brazil           | 1973        | 1.0<br>(1.0–1.0)    |
| Brazil           | 1974        | 1.0<br>(1.0–1.0)    |
| Brazil           | 1975        | 1.0<br>(1.0–1.0)    |
| Brazil           | 1976        | 1.0<br>(1.0–1.0)    |
| Brazil           | 1977        | 1.0<br>(1.0–1.0)    |
| Brazil           | 1978        | 1.0<br>(1.0–1.0)    |

**Table 15 Ratio of adjusted to unadjusted 5q0 values for scaled locations by year**

| <b>Geography</b> | <b>Year</b> | <b>Ratio</b>     |
|------------------|-------------|------------------|
| Brazil           | 1979        | 1.0<br>(1.0–1.0) |
| Brazil           | 1980        | 1.0<br>(1.0–1.0) |
| Brazil           | 1981        | 1.0<br>(1.0–1.0) |
| Brazil           | 1982        | 1.0<br>(1.0–1.0) |
| Brazil           | 1983        | 1.0<br>(1.0–1.0) |
| Brazil           | 1984        | 1.0<br>(1.0–1.0) |
| Brazil           | 1985        | 1.0<br>(1.0–1.0) |
| Brazil           | 1986        | 1.0<br>(1.0–1.0) |
| Brazil           | 1987        | 1.0<br>(1.0–1.0) |
| Brazil           | 1988        | 1.0<br>(1.0–1.0) |
| Brazil           | 1989        | 1.0<br>(1.0–1.0) |
| Brazil           | 1990        | 1.0<br>(1.0–1.0) |
| Brazil           | 1991        | 1.0<br>(1.0–1.0) |
| Brazil           | 1992        | 1.0<br>(1.0–1.0) |
| Brazil           | 1993        | 1.0<br>(1.0–1.0) |
| Brazil           | 1994        | 1.0<br>(1.0–1.0) |
| Brazil           | 1995        | 1.0<br>(1.0–1.0) |
| Brazil           | 1996        | 1.0<br>(1.0–1.0) |
| Brazil           | 1997        | 1.0<br>(1.0–1.0) |
| Brazil           | 1998        | 1.0<br>(1.0–1.0) |
| Brazil           | 1999        | 1.0<br>(1.0–1.0) |
| Brazil           | 2000        | 1.0<br>(1.0–1.0) |
| Brazil           | 2001        | 1.0<br>(1.0–1.0) |
| Brazil           | 2002        | 1.0<br>(1.0–1.0) |
| Brazil           | 2003        | 1.0<br>(1.0–1.0) |
| Brazil           | 2004        | 1.0<br>(1.0–1.0) |
| Brazil           | 2005        | 1.0<br>(1.0–1.0) |
| Brazil           | 2006        | 1.0<br>(1.0–1.0) |
| Brazil           | 2007        | 1.0<br>(1.0–1.0) |
| Brazil           | 2008        | 1.0<br>(1.0–1.0) |
| Brazil           | 2009        | 1.0<br>(1.0–1.0) |

**Table 15 Ratio of adjusted to unadjusted 5q0 values for scaled locations by year**

| <b>Geography</b> | <b>Year</b> | <b>Ratio</b>        |
|------------------|-------------|---------------------|
| Brazil           | 2010        | 1.0<br>(1.0–1.0)    |
| Brazil           | 2011        | 1.0<br>(1.0–1.0)    |
| Brazil           | 2012        | 1.0<br>(1.0–1.0)    |
| Brazil           | 2013        | 1.0<br>(1.0–1.0)    |
| Brazil           | 2014        | 1.0<br>(1.0–1.0)    |
| Brazil           | 2015        | 1.0<br>(1.0–1.0)    |
| Brazil           | 2016        | 1.0<br>(1.0–1.0)    |
| Brazil           | 2017        | 1.0<br>(1.0–1.0)    |
| Acre             | 1950        | 1.23<br>(1.13–1.31) |
| Acre             | 1951        | 1.23<br>(1.13–1.31) |
| Acre             | 1952        | 1.23<br>(1.13–1.32) |
| Acre             | 1953        | 1.23<br>(1.13–1.33) |
| Acre             | 1954        | 1.23<br>(1.13–1.34) |
| Acre             | 1955        | 1.23<br>(1.13–1.34) |
| Acre             | 1956        | 1.22<br>(1.11–1.32) |
| Acre             | 1957        | 1.22<br>(1.12–1.32) |
| Acre             | 1958        | 1.22<br>(1.14–1.31) |
| Acre             | 1959        | 1.22<br>(1.15–1.29) |
| Acre             | 1960        | 1.23<br>(1.18–1.28) |
| Acre             | 1961        | 1.24<br>(1.19–1.28) |
| Acre             | 1962        | 1.25<br>(1.18–1.31) |
| Acre             | 1963        | 1.25<br>(1.17–1.33) |
| Acre             | 1964        | 1.26<br>(1.17–1.36) |
| Acre             | 1965        | 1.27<br>(1.17–1.37) |
| Acre             | 1966        | 1.28<br>(1.19–1.37) |
| Acre             | 1967        | 1.29<br>(1.19–1.38) |
| Acre             | 1968        | 1.29<br>(1.21–1.38) |
| Acre             | 1969        | 1.3<br>(1.21–1.38)  |
| Acre             | 1970        | 1.3<br>(1.22–1.39)  |
| Acre             | 1971        | 1.3<br>(1.21–1.39)  |
| Acre             | 1972        | 1.3<br>(1.21–1.39)  |

**Table 15 Ratio of adjusted to unadjusted 5q0 values for scaled locations by year**

| <b>Geography</b> | <b>Year</b> | <b>Ratio</b>        |
|------------------|-------------|---------------------|
| Acre             | 1973        | 1.29<br>(1.2–1.4)   |
| Acre             | 1974        | 1.28<br>(1.19–1.39) |
| Acre             | 1975        | 1.27<br>(1.17–1.38) |
| Acre             | 1976        | 1.26<br>(1.16–1.37) |
| Acre             | 1977        | 1.25<br>(1.15–1.35) |
| Acre             | 1978        | 1.23<br>(1.14–1.33) |
| Acre             | 1979        | 1.24<br>(1.15–1.33) |
| Acre             | 1980        | 1.28<br>(1.18–1.37) |
| Acre             | 1981        | 1.25<br>(1.16–1.34) |
| Acre             | 1982        | 1.25<br>(1.17–1.34) |
| Acre             | 1983        | 1.27<br>(1.19–1.36) |
| Acre             | 1984        | 1.26<br>(1.18–1.34) |
| Acre             | 1985        | 1.29<br>(1.22–1.37) |
| Acre             | 1986        | 1.28<br>(1.21–1.35) |
| Acre             | 1987        | 1.28<br>(1.2–1.35)  |
| Acre             | 1988        | 1.26<br>(1.18–1.33) |
| Acre             | 1989        | 1.26<br>(1.19–1.34) |
| Acre             | 1990        | 1.27<br>(1.18–1.35) |
| Acre             | 1991        | 1.29<br>(1.2–1.39)  |
| Acre             | 1992        | 1.27<br>(1.18–1.37) |
| Acre             | 1993        | 1.25<br>(1.16–1.35) |
| Acre             | 1994        | 1.23<br>(1.15–1.33) |
| Acre             | 1995        | 1.24<br>(1.14–1.34) |
| Acre             | 1996        | 1.25<br>(1.15–1.36) |
| Acre             | 1997        | 1.25<br>(1.15–1.36) |
| Acre             | 1998        | 1.26<br>(1.16–1.35) |
| Acre             | 1999        | 1.26<br>(1.17–1.35) |
| Acre             | 2000        | 1.26<br>(1.18–1.34) |
| Acre             | 2001        | 1.29<br>(1.22–1.36) |
| Acre             | 2002        | 1.3<br>(1.23–1.36)  |
| Acre             | 2003        | 1.29<br>(1.21–1.37) |



**Table 15 Ratio of adjusted to unadjusted 5q0 values for scaled locations by year**

| <b>Geography</b> | <b>Year</b> | <b>Ratio</b>        |
|------------------|-------------|---------------------|
| Acre             | 2004        | 1.29<br>(1.19–1.39) |
| Acre             | 2005        | 1.29<br>(1.17–1.39) |
| Acre             | 2006        | 1.28<br>(1.16–1.4)  |
| Acre             | 2007        | 1.28<br>(1.15–1.4)  |
| Acre             | 2008        | 1.27<br>(1.15–1.39) |
| Acre             | 2009        | 1.25<br>(1.13–1.37) |
| Acre             | 2010        | 1.24<br>(1.12–1.36) |
| Acre             | 2011        | 1.22<br>(1.1–1.35)  |
| Acre             | 2012        | 1.21<br>(1.08–1.34) |
| Acre             | 2013        | 1.19<br>(1.07–1.32) |
| Acre             | 2014        | 1.18<br>(1.07–1.3)  |
| Acre             | 2015        | 1.16<br>(1.06–1.28) |
| Acre             | 2016        | 1.15<br>(1.04–1.26) |
| Acre             | 2017        | 1.16<br>(1.05–1.28) |
| Alagoas          | 1950        | 1.21<br>(1.13–1.28) |
| Alagoas          | 1951        | 1.21<br>(1.13–1.29) |
| Alagoas          | 1952        | 1.22<br>(1.13–1.3)  |
| Alagoas          | 1953        | 1.22<br>(1.13–1.31) |
| Alagoas          | 1954        | 1.22<br>(1.12–1.32) |
| Alagoas          | 1955        | 1.22<br>(1.12–1.32) |
| Alagoas          | 1956        | 1.21<br>(1.11–1.3)  |
| Alagoas          | 1957        | 1.21<br>(1.12–1.3)  |
| Alagoas          | 1958        | 1.21<br>(1.13–1.29) |
| Alagoas          | 1959        | 1.21<br>(1.15–1.28) |
| Alagoas          | 1960        | 1.22<br>(1.17–1.26) |
| Alagoas          | 1961        | 1.23<br>(1.18–1.27) |
| Alagoas          | 1962        | 1.23<br>(1.17–1.29) |
| Alagoas          | 1963        | 1.24<br>(1.16–1.31) |
| Alagoas          | 1964        | 1.25<br>(1.16–1.34) |
| Alagoas          | 1965        | 1.25<br>(1.16–1.35) |
| Alagoas          | 1966        | 1.26<br>(1.17–1.35) |

**Table 15 Ratio of adjusted to unadjusted 5q0 values for scaled locations by year**

| <b>Geography</b> | <b>Year</b> | <b>Ratio</b>        |
|------------------|-------------|---------------------|
| Alagoas          | 1967        | 1.27<br>(1.18–1.36) |
| Alagoas          | 1968        | 1.27<br>(1.19–1.36) |
| Alagoas          | 1969        | 1.28<br>(1.2–1.36)  |
| Alagoas          | 1970        | 1.28<br>(1.2–1.36)  |
| Alagoas          | 1971        | 1.28<br>(1.2–1.37)  |
| Alagoas          | 1972        | 1.28<br>(1.2–1.37)  |
| Alagoas          | 1973        | 1.27<br>(1.19–1.37) |
| Alagoas          | 1974        | 1.27<br>(1.18–1.36) |
| Alagoas          | 1975        | 1.26<br>(1.16–1.36) |
| Alagoas          | 1976        | 1.24<br>(1.15–1.34) |
| Alagoas          | 1977        | 1.23<br>(1.14–1.32) |
| Alagoas          | 1978        | 1.22<br>(1.13–1.31) |
| Alagoas          | 1979        | 1.22<br>(1.14–1.31) |
| Alagoas          | 1980        | 1.26<br>(1.17–1.34) |
| Alagoas          | 1981        | 1.24<br>(1.15–1.32) |
| Alagoas          | 1982        | 1.24<br>(1.16–1.32) |
| Alagoas          | 1983        | 1.26<br>(1.18–1.34) |
| Alagoas          | 1984        | 1.25<br>(1.17–1.32) |
| Alagoas          | 1985        | 1.27<br>(1.21–1.35) |
| Alagoas          | 1986        | 1.27<br>(1.2–1.33)  |
| Alagoas          | 1987        | 1.26<br>(1.2–1.33)  |
| Alagoas          | 1988        | 1.25<br>(1.18–1.32) |
| Alagoas          | 1989        | 1.25<br>(1.18–1.33) |
| Alagoas          | 1990        | 1.26<br>(1.18–1.34) |
| Alagoas          | 1991        | 1.28<br>(1.19–1.37) |
| Alagoas          | 1992        | 1.27<br>(1.17–1.37) |
| Alagoas          | 1993        | 1.24<br>(1.16–1.34) |
| Alagoas          | 1994        | 1.23<br>(1.14–1.33) |
| Alagoas          | 1995        | 1.23<br>(1.14–1.34) |
| Alagoas          | 1996        | 1.24<br>(1.15–1.35) |
| Alagoas          | 1997        | 1.25<br>(1.15–1.35) |

**Table 15 Ratio of adjusted to unadjusted 5q0 values for scaled locations by year**

| <b>Geography</b> | <b>Year</b> | <b>Ratio</b>        |
|------------------|-------------|---------------------|
| Alagoas          | 1998        | 1.25<br>(1.16–1.35) |
| Alagoas          | 1999        | 1.26<br>(1.17–1.35) |
| Alagoas          | 2000        | 1.26<br>(1.18–1.33) |
| Alagoas          | 2001        | 1.29<br>(1.22–1.36) |
| Alagoas          | 2002        | 1.3<br>(1.23–1.36)  |
| Alagoas          | 2003        | 1.29<br>(1.21–1.37) |
| Alagoas          | 2004        | 1.29<br>(1.19–1.39) |
| Alagoas          | 2005        | 1.28<br>(1.17–1.39) |
| Alagoas          | 2006        | 1.28<br>(1.16–1.4)  |
| Alagoas          | 2007        | 1.28<br>(1.15–1.4)  |
| Alagoas          | 2008        | 1.27<br>(1.15–1.39) |
| Alagoas          | 2009        | 1.25<br>(1.13–1.37) |
| Alagoas          | 2010        | 1.24<br>(1.12–1.37) |
| Alagoas          | 2011        | 1.22<br>(1.1–1.35)  |
| Alagoas          | 2012        | 1.21<br>(1.08–1.34) |
| Alagoas          | 2013        | 1.19<br>(1.07–1.32) |
| Alagoas          | 2014        | 1.18<br>(1.07–1.3)  |
| Alagoas          | 2015        | 1.16<br>(1.06–1.28) |
| Alagoas          | 2016        | 1.15<br>(1.04–1.26) |
| Alagoas          | 2017        | 1.16<br>(1.05–1.28) |
| Amapá            | 1950        | 1.23<br>(1.14–1.31) |
| Amapá            | 1951        | 1.23<br>(1.14–1.32) |
| Amapá            | 1952        | 1.23<br>(1.14–1.33) |
| Amapá            | 1953        | 1.23<br>(1.13–1.34) |
| Amapá            | 1954        | 1.24<br>(1.13–1.35) |
| Amapá            | 1955        | 1.23<br>(1.13–1.34) |
| Amapá            | 1956        | 1.22<br>(1.12–1.33) |
| Amapá            | 1957        | 1.22<br>(1.12–1.32) |
| Amapá            | 1958        | 1.22<br>(1.14–1.31) |
| Amapá            | 1959        | 1.23<br>(1.16–1.3)  |
| Amapá            | 1960        | 1.24<br>(1.18–1.29) |

**Table 15 Ratio of adjusted to unadjusted 5q0 values for scaled locations by year**

| <b>Geography</b> | <b>Year</b> | <b>Ratio</b>        |
|------------------|-------------|---------------------|
| Amapá            | 1961        | 1.24<br>(1.19–1.29) |
| Amapá            | 1962        | 1.25<br>(1.18–1.31) |
| Amapá            | 1963        | 1.26<br>(1.17–1.34) |
| Amapá            | 1964        | 1.27<br>(1.17–1.37) |
| Amapá            | 1965        | 1.28<br>(1.18–1.37) |
| Amapá            | 1966        | 1.29<br>(1.19–1.38) |
| Amapá            | 1967        | 1.29<br>(1.2–1.39)  |
| Amapá            | 1968        | 1.3<br>(1.21–1.39)  |
| Amapá            | 1969        | 1.3<br>(1.22–1.39)  |
| Amapá            | 1970        | 1.31<br>(1.22–1.39) |
| Amapá            | 1971        | 1.31<br>(1.22–1.4)  |
| Amapá            | 1972        | 1.3<br>(1.21–1.4)   |
| Amapá            | 1973        | 1.3<br>(1.2–1.41)   |
| Amapá            | 1974        | 1.29<br>(1.19–1.4)  |
| Amapá            | 1975        | 1.28<br>(1.18–1.39) |
| Amapá            | 1976        | 1.27<br>(1.16–1.38) |
| Amapá            | 1977        | 1.26<br>(1.16–1.36) |
| Amapá            | 1978        | 1.24<br>(1.15–1.34) |
| Amapá            | 1979        | 1.25<br>(1.15–1.35) |
| Amapá            | 1980        | 1.29<br>(1.19–1.39) |
| Amapá            | 1981        | 1.26<br>(1.17–1.36) |
| Amapá            | 1982        | 1.26<br>(1.18–1.36) |
| Amapá            | 1983        | 1.28<br>(1.19–1.37) |
| Amapá            | 1984        | 1.27<br>(1.19–1.35) |
| Amapá            | 1985        | 1.3<br>(1.23–1.38)  |
| Amapá            | 1986        | 1.29<br>(1.22–1.36) |
| Amapá            | 1987        | 1.28<br>(1.21–1.36) |
| Amapá            | 1988        | 1.26<br>(1.19–1.34) |
| Amapá            | 1989        | 1.27<br>(1.19–1.35) |
| Amapá            | 1990        | 1.28<br>(1.19–1.36) |
| Amapá            | 1991        | 1.29<br>(1.2–1.39)  |

**Table 15 Ratio of adjusted to unadjusted 5q0 values for scaled locations by year**

| <b>Geography</b> | <b>Year</b> | <b>Ratio</b>        |
|------------------|-------------|---------------------|
| Amapá            | 1992        | 1.28<br>(1.18–1.38) |
| Amapá            | 1993        | 1.25<br>(1.16–1.35) |
| Amapá            | 1994        | 1.24<br>(1.15–1.34) |
| Amapá            | 1995        | 1.24<br>(1.15–1.35) |
| Amapá            | 1996        | 1.25<br>(1.15–1.37) |
| Amapá            | 1997        | 1.25<br>(1.16–1.36) |
| Amapá            | 1998        | 1.26<br>(1.16–1.36) |
| Amapá            | 1999        | 1.26<br>(1.17–1.36) |
| Amapá            | 2000        | 1.26<br>(1.18–1.34) |
| Amapá            | 2001        | 1.29<br>(1.22–1.36) |
| Amapá            | 2002        | 1.3<br>(1.23–1.37)  |
| Amapá            | 2003        | 1.3<br>(1.21–1.37)  |
| Amapá            | 2004        | 1.29<br>(1.19–1.39) |
| Amapá            | 2005        | 1.29<br>(1.17–1.4)  |
| Amapá            | 2006        | 1.28<br>(1.16–1.41) |
| Amapá            | 2007        | 1.28<br>(1.15–1.4)  |
| Amapá            | 2008        | 1.27<br>(1.15–1.39) |
| Amapá            | 2009        | 1.25<br>(1.13–1.37) |
| Amapá            | 2010        | 1.24<br>(1.12–1.37) |
| Amapá            | 2011        | 1.22<br>(1.1–1.36)  |
| Amapá            | 2012        | 1.21<br>(1.08–1.34) |
| Amapá            | 2013        | 1.19<br>(1.07–1.32) |
| Amapá            | 2014        | 1.18<br>(1.07–1.3)  |
| Amapá            | 2015        | 1.16<br>(1.06–1.28) |
| Amapá            | 2016        | 1.15<br>(1.04–1.26) |
| Amapá            | 2017        | 1.16<br>(1.05–1.28) |
| Amazonas         | 1950        | 1.24<br>(1.14–1.32) |
| Amazonas         | 1951        | 1.24<br>(1.14–1.33) |
| Amazonas         | 1952        | 1.24<br>(1.14–1.34) |
| Amazonas         | 1953        | 1.24<br>(1.14–1.35) |
| Amazonas         | 1954        | 1.24<br>(1.13–1.36) |

**Table 15 Ratio of adjusted to unadjusted 5q0 values for scaled locations by year**

| <b>Geography</b> | <b>Year</b> | <b>Ratio</b>        |
|------------------|-------------|---------------------|
| Amazonas         | 1955        | 1.24<br>(1.13–1.35) |
| Amazonas         | 1956        | 1.23<br>(1.12–1.33) |
| Amazonas         | 1957        | 1.23<br>(1.13–1.33) |
| Amazonas         | 1958        | 1.23<br>(1.14–1.32) |
| Amazonas         | 1959        | 1.23<br>(1.16–1.31) |
| Amazonas         | 1960        | 1.24<br>(1.18–1.29) |
| Amazonas         | 1961        | 1.25<br>(1.2–1.3)   |
| Amazonas         | 1962        | 1.25<br>(1.18–1.32) |
| Amazonas         | 1963        | 1.26<br>(1.17–1.35) |
| Amazonas         | 1964        | 1.27<br>(1.17–1.37) |
| Amazonas         | 1965        | 1.28<br>(1.18–1.38) |
| Amazonas         | 1966        | 1.29<br>(1.19–1.39) |
| Amazonas         | 1967        | 1.29<br>(1.2–1.39)  |
| Amazonas         | 1968        | 1.3<br>(1.21–1.39)  |
| Amazonas         | 1969        | 1.3<br>(1.22–1.39)  |
| Amazonas         | 1970        | 1.31<br>(1.22–1.39) |
| Amazonas         | 1971        | 1.3<br>(1.21–1.4)   |
| Amazonas         | 1972        | 1.3<br>(1.21–1.4)   |
| Amazonas         | 1973        | 1.3<br>(1.2–1.4)    |
| Amazonas         | 1974        | 1.28<br>(1.19–1.39) |
| Amazonas         | 1975        | 1.27<br>(1.17–1.38) |
| Amazonas         | 1976        | 1.26<br>(1.16–1.37) |
| Amazonas         | 1977        | 1.25<br>(1.15–1.35) |
| Amazonas         | 1978        | 1.24<br>(1.14–1.33) |
| Amazonas         | 1979        | 1.24<br>(1.15–1.33) |
| Amazonas         | 1980        | 1.28<br>(1.18–1.38) |
| Amazonas         | 1981        | 1.26<br>(1.16–1.34) |
| Amazonas         | 1982        | 1.26<br>(1.17–1.35) |
| Amazonas         | 1983        | 1.28<br>(1.19–1.36) |
| Amazonas         | 1984        | 1.27<br>(1.18–1.35) |
| Amazonas         | 1985        | 1.29<br>(1.22–1.37) |

**Table 15 Ratio of adjusted to unadjusted 5q0 values for scaled locations by year**

| <b>Geography</b> | <b>Year</b> | <b>Ratio</b>        |
|------------------|-------------|---------------------|
| Amazonas         | 1986        | 1.28<br>(1.21–1.35) |
| Amazonas         | 1987        | 1.28<br>(1.21–1.35) |
| Amazonas         | 1988        | 1.26<br>(1.19–1.33) |
| Amazonas         | 1989        | 1.27<br>(1.19–1.35) |
| Amazonas         | 1990        | 1.27<br>(1.18–1.36) |
| Amazonas         | 1991        | 1.29<br>(1.2–1.39)  |
| Amazonas         | 1992        | 1.28<br>(1.18–1.38) |
| Amazonas         | 1993        | 1.25<br>(1.16–1.35) |
| Amazonas         | 1994        | 1.23<br>(1.15–1.33) |
| Amazonas         | 1995        | 1.24<br>(1.15–1.35) |
| Amazonas         | 1996        | 1.25<br>(1.15–1.36) |
| Amazonas         | 1997        | 1.25<br>(1.16–1.36) |
| Amazonas         | 1998        | 1.26<br>(1.16–1.36) |
| Amazonas         | 1999        | 1.26<br>(1.17–1.36) |
| Amazonas         | 2000        | 1.26<br>(1.18–1.34) |
| Amazonas         | 2001        | 1.29<br>(1.22–1.36) |
| Amazonas         | 2002        | 1.3<br>(1.23–1.37)  |
| Amazonas         | 2003        | 1.3<br>(1.21–1.37)  |
| Amazonas         | 2004        | 1.29<br>(1.19–1.39) |
| Amazonas         | 2005        | 1.29<br>(1.17–1.4)  |
| Amazonas         | 2006        | 1.28<br>(1.16–1.41) |
| Amazonas         | 2007        | 1.28<br>(1.15–1.4)  |
| Amazonas         | 2008        | 1.27<br>(1.15–1.39) |
| Amazonas         | 2009        | 1.25<br>(1.13–1.37) |
| Amazonas         | 2010        | 1.24<br>(1.12–1.37) |
| Amazonas         | 2011        | 1.22<br>(1.1–1.36)  |
| Amazonas         | 2012        | 1.21<br>(1.09–1.34) |
| Amazonas         | 2013        | 1.19<br>(1.07–1.32) |
| Amazonas         | 2014        | 1.18<br>(1.07–1.3)  |
| Amazonas         | 2015        | 1.16<br>(1.06–1.28) |
| Amazonas         | 2016        | 1.15<br>(1.04–1.26) |

**Table 15 Ratio of adjusted to unadjusted 5q0 values for scaled locations by year**

| <b>Geography</b> | <b>Year</b> | <b>Ratio</b>        |
|------------------|-------------|---------------------|
| Amazonas         | 2017        | 1.16<br>(1.05–1.28) |
| Bahia            | 1950        | 1.22<br>(1.14–1.29) |
| Bahia            | 1951        | 1.22<br>(1.13–1.3)  |
| Bahia            | 1952        | 1.22<br>(1.14–1.31) |
| Bahia            | 1953        | 1.23<br>(1.13–1.32) |
| Bahia            | 1954        | 1.23<br>(1.13–1.33) |
| Bahia            | 1955        | 1.23<br>(1.12–1.33) |
| Bahia            | 1956        | 1.21<br>(1.11–1.32) |
| Bahia            | 1957        | 1.21<br>(1.12–1.31) |
| Bahia            | 1958        | 1.22<br>(1.14–1.3)  |
| Bahia            | 1959        | 1.22<br>(1.15–1.29) |
| Bahia            | 1960        | 1.23<br>(1.18–1.27) |
| Bahia            | 1961        | 1.23<br>(1.19–1.28) |
| Bahia            | 1962        | 1.24<br>(1.17–1.3)  |
| Bahia            | 1963        | 1.25<br>(1.16–1.33) |
| Bahia            | 1964        | 1.26<br>(1.16–1.36) |
| Bahia            | 1965        | 1.27<br>(1.17–1.36) |
| Bahia            | 1966        | 1.28<br>(1.18–1.37) |
| Bahia            | 1967        | 1.28<br>(1.19–1.37) |
| Bahia            | 1968        | 1.29<br>(1.2–1.37)  |
| Bahia            | 1969        | 1.29<br>(1.21–1.38) |
| Bahia            | 1970        | 1.3<br>(1.21–1.38)  |
| Bahia            | 1971        | 1.3<br>(1.21–1.39)  |
| Bahia            | 1972        | 1.29<br>(1.21–1.39) |
| Bahia            | 1973        | 1.29<br>(1.19–1.39) |
| Bahia            | 1974        | 1.28<br>(1.18–1.39) |
| Bahia            | 1975        | 1.27<br>(1.17–1.38) |
| Bahia            | 1976        | 1.26<br>(1.16–1.37) |
| Bahia            | 1977        | 1.25<br>(1.15–1.35) |
| Bahia            | 1978        | 1.23<br>(1.14–1.33) |
| Bahia            | 1979        | 1.24<br>(1.15–1.33) |



**Table 15 Ratio of adjusted to unadjusted 5q0 values for scaled locations by year**

| <b>Geography</b> | <b>Year</b> | <b>Ratio</b>        |
|------------------|-------------|---------------------|
| Bahia            | 1980        | 1.28<br>(1.18–1.37) |
| Bahia            | 1981        | 1.25<br>(1.16–1.34) |
| Bahia            | 1982        | 1.25<br>(1.17–1.34) |
| Bahia            | 1983        | 1.27<br>(1.19–1.36) |
| Bahia            | 1984        | 1.26<br>(1.18–1.34) |
| Bahia            | 1985        | 1.29<br>(1.22–1.37) |
| Bahia            | 1986        | 1.28<br>(1.21–1.34) |
| Bahia            | 1987        | 1.27<br>(1.2–1.34)  |
| Bahia            | 1988        | 1.26<br>(1.18–1.33) |
| Bahia            | 1989        | 1.26<br>(1.18–1.34) |
| Bahia            | 1990        | 1.27<br>(1.18–1.35) |
| Bahia            | 1991        | 1.29<br>(1.2–1.38)  |
| Bahia            | 1992        | 1.27<br>(1.18–1.37) |
| Bahia            | 1993        | 1.25<br>(1.16–1.35) |
| Bahia            | 1994        | 1.23<br>(1.15–1.33) |
| Bahia            | 1995        | 1.24<br>(1.14–1.34) |
| Bahia            | 1996        | 1.25<br>(1.15–1.36) |
| Bahia            | 1997        | 1.25<br>(1.15–1.36) |
| Bahia            | 1998        | 1.26<br>(1.16–1.35) |
| Bahia            | 1999        | 1.26<br>(1.17–1.35) |
| Bahia            | 2000        | 1.26<br>(1.18–1.34) |
| Bahia            | 2001        | 1.29<br>(1.22–1.36) |
| Bahia            | 2002        | 1.3<br>(1.23–1.36)  |
| Bahia            | 2003        | 1.29<br>(1.21–1.37) |
| Bahia            | 2004        | 1.29<br>(1.19–1.39) |
| Bahia            | 2005        | 1.29<br>(1.17–1.4)  |
| Bahia            | 2006        | 1.28<br>(1.16–1.4)  |
| Bahia            | 2007        | 1.28<br>(1.15–1.4)  |
| Bahia            | 2008        | 1.27<br>(1.15–1.39) |
| Bahia            | 2009        | 1.25<br>(1.13–1.37) |
| Bahia            | 2010        | 1.24<br>(1.12–1.36) |

**Table 15 Ratio of adjusted to unadjusted 5q0 values for scaled locations by year**

| <b>Geography</b> | <b>Year</b> | <b>Ratio</b>        |
|------------------|-------------|---------------------|
| Bahia            | 2011        | 1.22<br>(1.1–1.35)  |
| Bahia            | 2012        | 1.21<br>(1.08–1.34) |
| Bahia            | 2013        | 1.19<br>(1.07–1.32) |
| Bahia            | 2014        | 1.18<br>(1.07–1.3)  |
| Bahia            | 2015        | 1.16<br>(1.06–1.28) |
| Bahia            | 2016        | 1.15<br>(1.04–1.26) |
| Bahia            | 2017        | 1.16<br>(1.05–1.28) |
| Ceará            | 1950        | 1.2<br>(1.13–1.26)  |
| Ceará            | 1951        | 1.2<br>(1.12–1.27)  |
| Ceará            | 1952        | 1.2<br>(1.13–1.28)  |
| Ceará            | 1953        | 1.21<br>(1.12–1.29) |
| Ceará            | 1954        | 1.21<br>(1.12–1.3)  |
| Ceará            | 1955        | 1.21<br>(1.11–1.3)  |
| Ceará            | 1956        | 1.2<br>(1.1–1.29)   |
| Ceará            | 1957        | 1.2<br>(1.11–1.29)  |
| Ceará            | 1958        | 1.2<br>(1.13–1.28)  |
| Ceará            | 1959        | 1.2<br>(1.14–1.27)  |
| Ceará            | 1960        | 1.21<br>(1.16–1.25) |
| Ceará            | 1961        | 1.22<br>(1.17–1.25) |
| Ceará            | 1962        | 1.22<br>(1.16–1.28) |
| Ceará            | 1963        | 1.23<br>(1.15–1.3)  |
| Ceará            | 1964        | 1.24<br>(1.15–1.33) |
| Ceará            | 1965        | 1.25<br>(1.16–1.34) |
| Ceará            | 1966        | 1.26<br>(1.17–1.34) |
| Ceará            | 1967        | 1.26<br>(1.18–1.34) |
| Ceará            | 1968        | 1.27<br>(1.19–1.34) |
| Ceará            | 1969        | 1.27<br>(1.2–1.35)  |
| Ceará            | 1970        | 1.28<br>(1.2–1.35)  |
| Ceará            | 1971        | 1.28<br>(1.2–1.36)  |
| Ceará            | 1972        | 1.28<br>(1.2–1.36)  |
| Ceará            | 1973        | 1.27<br>(1.18–1.37) |

**Table 15 Ratio of adjusted to unadjusted 5q0 values for scaled locations by year**

| <b>Geography</b> | <b>Year</b> | <b>Ratio</b>        |
|------------------|-------------|---------------------|
| Ceará            | 1974        | 1.26<br>(1.17–1.36) |
| Ceará            | 1975        | 1.25<br>(1.16–1.36) |
| Ceará            | 1976        | 1.24<br>(1.15–1.35) |
| Ceará            | 1977        | 1.23<br>(1.14–1.33) |
| Ceará            | 1978        | 1.22<br>(1.13–1.31) |
| Ceará            | 1979        | 1.23<br>(1.14–1.31) |
| Ceará            | 1980        | 1.26<br>(1.17–1.35) |
| Ceará            | 1981        | 1.24<br>(1.15–1.32) |
| Ceará            | 1982        | 1.24<br>(1.16–1.33) |
| Ceará            | 1983        | 1.26<br>(1.18–1.34) |
| Ceará            | 1984        | 1.25<br>(1.17–1.33) |
| Ceará            | 1985        | 1.28<br>(1.21–1.35) |
| Ceará            | 1986        | 1.27<br>(1.2–1.33)  |
| Ceará            | 1987        | 1.27<br>(1.2–1.34)  |
| Ceará            | 1988        | 1.25<br>(1.18–1.32) |
| Ceará            | 1989        | 1.26<br>(1.18–1.34) |
| Ceará            | 1990        | 1.26<br>(1.18–1.35) |
| Ceará            | 1991        | 1.28<br>(1.19–1.38) |
| Ceará            | 1992        | 1.27<br>(1.18–1.37) |
| Ceará            | 1993        | 1.25<br>(1.16–1.34) |
| Ceará            | 1994        | 1.23<br>(1.14–1.33) |
| Ceará            | 1995        | 1.23<br>(1.14–1.34) |
| Ceará            | 1996        | 1.24<br>(1.15–1.36) |
| Ceará            | 1997        | 1.25<br>(1.15–1.36) |
| Ceará            | 1998        | 1.26<br>(1.16–1.35) |
| Ceará            | 1999        | 1.26<br>(1.17–1.35) |
| Ceará            | 2000        | 1.26<br>(1.18–1.34) |
| Ceará            | 2001        | 1.29<br>(1.22–1.36) |
| Ceará            | 2002        | 1.3<br>(1.23–1.36)  |
| Ceará            | 2003        | 1.29<br>(1.21–1.37) |
| Ceará            | 2004        | 1.29<br>(1.19–1.39) |

**Table 15 Ratio of adjusted to unadjusted 5q0 values for scaled locations by year**

| <b>Geography</b> | <b>Year</b> | <b>Ratio</b>        |
|------------------|-------------|---------------------|
| Ceará            | 2005        | 1.29<br>(1.17–1.39) |
| Ceará            | 2006        | 1.28<br>(1.16–1.4)  |
| Ceará            | 2007        | 1.28<br>(1.15–1.4)  |
| Ceará            | 2008        | 1.27<br>(1.15–1.39) |
| Ceará            | 2009        | 1.25<br>(1.13–1.37) |
| Ceará            | 2010        | 1.24<br>(1.12–1.36) |
| Ceará            | 2011        | 1.22<br>(1.1–1.35)  |
| Ceará            | 2012        | 1.21<br>(1.08–1.34) |
| Ceará            | 2013        | 1.19<br>(1.07–1.32) |
| Ceará            | 2014        | 1.18<br>(1.07–1.3)  |
| Ceará            | 2015        | 1.16<br>(1.06–1.28) |
| Ceará            | 2016        | 1.15<br>(1.04–1.26) |
| Ceará            | 2017        | 1.16<br>(1.05–1.28) |
| Distrito Federal | 1950        | 1.23<br>(1.14–1.31) |
| Distrito Federal | 1951        | 1.23<br>(1.14–1.32) |
| Distrito Federal | 1952        | 1.24<br>(1.14–1.33) |
| Distrito Federal | 1953        | 1.24<br>(1.14–1.34) |
| Distrito Federal | 1954        | 1.24<br>(1.13–1.35) |
| Distrito Federal | 1955        | 1.24<br>(1.13–1.35) |
| Distrito Federal | 1956        | 1.23<br>(1.12–1.33) |
| Distrito Federal | 1957        | 1.22<br>(1.12–1.33) |
| Distrito Federal | 1958        | 1.23<br>(1.14–1.32) |
| Distrito Federal | 1959        | 1.23<br>(1.16–1.31) |
| Distrito Federal | 1960        | 1.24<br>(1.18–1.29) |
| Distrito Federal | 1961        | 1.25<br>(1.19–1.29) |
| Distrito Federal | 1962        | 1.25<br>(1.18–1.32) |
| Distrito Federal | 1963        | 1.26<br>(1.17–1.35) |
| Distrito Federal | 1964        | 1.27<br>(1.17–1.37) |
| Distrito Federal | 1965        | 1.28<br>(1.18–1.38) |
| Distrito Federal | 1966        | 1.29<br>(1.19–1.39) |
| Distrito Federal | 1967        | 1.3<br>(1.2–1.39)   |

**Table 15 Ratio of adjusted to unadjusted 5q0 values for scaled locations by year**

| <b>Geography</b> | <b>Year</b> | <b>Ratio</b>        |
|------------------|-------------|---------------------|
| Distrito Federal | 1968        | 1.3<br>(1.21–1.39)  |
| Distrito Federal | 1969        | 1.31<br>(1.22–1.4)  |
| Distrito Federal | 1970        | 1.31<br>(1.22–1.4)  |
| Distrito Federal | 1971        | 1.31<br>(1.22–1.41) |
| Distrito Federal | 1972        | 1.31<br>(1.22–1.4)  |
| Distrito Federal | 1973        | 1.3<br>(1.2–1.41)   |
| Distrito Federal | 1974        | 1.29<br>(1.19–1.4)  |
| Distrito Federal | 1975        | 1.28<br>(1.18–1.4)  |
| Distrito Federal | 1976        | 1.27<br>(1.16–1.38) |
| Distrito Federal | 1977        | 1.26<br>(1.16–1.36) |
| Distrito Federal | 1978        | 1.24<br>(1.15–1.34) |
| Distrito Federal | 1979        | 1.25<br>(1.15–1.35) |
| Distrito Federal | 1980        | 1.29<br>(1.19–1.38) |
| Distrito Federal | 1981        | 1.26<br>(1.17–1.35) |
| Distrito Federal | 1982        | 1.26<br>(1.18–1.36) |
| Distrito Federal | 1983        | 1.28<br>(1.2–1.37)  |
| Distrito Federal | 1984        | 1.27<br>(1.19–1.35) |
| Distrito Federal | 1985        | 1.3<br>(1.23–1.38)  |
| Distrito Federal | 1986        | 1.29<br>(1.22–1.36) |
| Distrito Federal | 1987        | 1.29<br>(1.21–1.36) |
| Distrito Federal | 1988        | 1.27<br>(1.19–1.34) |
| Distrito Federal | 1989        | 1.27<br>(1.19–1.35) |
| Distrito Federal | 1990        | 1.28<br>(1.19–1.37) |
| Distrito Federal | 1991        | 1.29<br>(1.2–1.4)   |
| Distrito Federal | 1992        | 1.28<br>(1.18–1.39) |
| Distrito Federal | 1993        | 1.26<br>(1.16–1.36) |
| Distrito Federal | 1994        | 1.24<br>(1.15–1.34) |
| Distrito Federal | 1995        | 1.24<br>(1.15–1.35) |
| Distrito Federal | 1996        | 1.25<br>(1.15–1.37) |
| Distrito Federal | 1997        | 1.26<br>(1.16–1.37) |
| Distrito Federal | 1998        | 1.26<br>(1.16–1.36) |

**Table 15 Ratio of adjusted to unadjusted 5q0 values for scaled locations by year**

| <b>Geography</b> | <b>Year</b> | <b>Ratio</b>        |
|------------------|-------------|---------------------|
| Distrito Federal | 1999        | 1.27<br>(1.18–1.36) |
| Distrito Federal | 2000        | 1.26<br>(1.18–1.34) |
| Distrito Federal | 2001        | 1.3<br>(1.22–1.37)  |
| Distrito Federal | 2002        | 1.31<br>(1.23–1.37) |
| Distrito Federal | 2003        | 1.3<br>(1.21–1.37)  |
| Distrito Federal | 2004        | 1.29<br>(1.19–1.39) |
| Distrito Federal | 2005        | 1.29<br>(1.17–1.4)  |
| Distrito Federal | 2006        | 1.28<br>(1.17–1.41) |
| Distrito Federal | 2007        | 1.28<br>(1.16–1.4)  |
| Distrito Federal | 2008        | 1.27<br>(1.15–1.39) |
| Distrito Federal | 2009        | 1.25<br>(1.13–1.38) |
| Distrito Federal | 2010        | 1.24<br>(1.12–1.37) |
| Distrito Federal | 2011        | 1.23<br>(1.1–1.36)  |
| Distrito Federal | 2012        | 1.21<br>(1.09–1.34) |
| Distrito Federal | 2013        | 1.19<br>(1.07–1.32) |
| Distrito Federal | 2014        | 1.18<br>(1.07–1.3)  |
| Distrito Federal | 2015        | 1.16<br>(1.06–1.28) |
| Distrito Federal | 2016        | 1.15<br>(1.04–1.26) |
| Distrito Federal | 2017        | 1.16<br>(1.05–1.28) |
| Espírito Santo   | 1950        | 1.24<br>(1.15–1.33) |
| Espírito Santo   | 1951        | 1.24<br>(1.14–1.34) |
| Espírito Santo   | 1952        | 1.25<br>(1.15–1.35) |
| Espírito Santo   | 1953        | 1.25<br>(1.14–1.36) |
| Espírito Santo   | 1954        | 1.25<br>(1.14–1.37) |
| Espírito Santo   | 1955        | 1.25<br>(1.13–1.36) |
| Espírito Santo   | 1956        | 1.23<br>(1.12–1.35) |
| Espírito Santo   | 1957        | 1.23<br>(1.13–1.34) |
| Espírito Santo   | 1958        | 1.23<br>(1.15–1.33) |
| Espírito Santo   | 1959        | 1.24<br>(1.16–1.31) |
| Espírito Santo   | 1960        | 1.25<br>(1.19–1.3)  |
| Espírito Santo   | 1961        | 1.25<br>(1.2–1.3)   |

**Table 15 Ratio of adjusted to unadjusted 5q0 values for scaled locations by year**

| <b>Geography</b> | <b>Year</b> | <b>Ratio</b>        |
|------------------|-------------|---------------------|
| Espírito Santo   | 1962        | 1.26<br>(1.18–1.32) |
| Espírito Santo   | 1963        | 1.27<br>(1.18–1.35) |
| Espírito Santo   | 1964        | 1.28<br>(1.18–1.38) |
| Espírito Santo   | 1965        | 1.28<br>(1.18–1.39) |
| Espírito Santo   | 1966        | 1.3<br>(1.19–1.39)  |
| Espírito Santo   | 1967        | 1.3<br>(1.2–1.4)    |
| Espírito Santo   | 1968        | 1.3<br>(1.21–1.4)   |
| Espírito Santo   | 1969        | 1.31<br>(1.22–1.4)  |
| Espírito Santo   | 1970        | 1.31<br>(1.22–1.4)  |
| Espírito Santo   | 1971        | 1.31<br>(1.22–1.41) |
| Espírito Santo   | 1972        | 1.31<br>(1.22–1.41) |
| Espírito Santo   | 1973        | 1.3<br>(1.2–1.41)   |
| Espírito Santo   | 1974        | 1.29<br>(1.19–1.4)  |
| Espírito Santo   | 1975        | 1.28<br>(1.18–1.39) |
| Espírito Santo   | 1976        | 1.27<br>(1.16–1.38) |
| Espírito Santo   | 1977        | 1.26<br>(1.16–1.36) |
| Espírito Santo   | 1978        | 1.24<br>(1.15–1.34) |
| Espírito Santo   | 1979        | 1.25<br>(1.15–1.34) |
| Espírito Santo   | 1980        | 1.29<br>(1.19–1.38) |
| Espírito Santo   | 1981        | 1.26<br>(1.17–1.35) |
| Espírito Santo   | 1982        | 1.26<br>(1.17–1.35) |
| Espírito Santo   | 1983        | 1.28<br>(1.19–1.37) |
| Espírito Santo   | 1984        | 1.27<br>(1.19–1.35) |
| Espírito Santo   | 1985        | 1.3<br>(1.23–1.38)  |
| Espírito Santo   | 1986        | 1.29<br>(1.22–1.35) |
| Espírito Santo   | 1987        | 1.28<br>(1.21–1.36) |
| Espírito Santo   | 1988        | 1.26<br>(1.19–1.34) |
| Espírito Santo   | 1989        | 1.27<br>(1.19–1.35) |
| Espírito Santo   | 1990        | 1.27<br>(1.19–1.36) |
| Espírito Santo   | 1991        | 1.29<br>(1.2–1.39)  |
| Espírito Santo   | 1992        | 1.28<br>(1.18–1.38) |

**Table 15 Ratio of adjusted to unadjusted 5q0 values for scaled locations by year**

| <b>Geography</b> | <b>Year</b> | <b>Ratio</b>        |
|------------------|-------------|---------------------|
| Espírito Santo   | 1993        | 1.25<br>(1.16–1.36) |
| Espírito Santo   | 1994        | 1.24<br>(1.15–1.34) |
| Espírito Santo   | 1995        | 1.24<br>(1.15–1.35) |
| Espírito Santo   | 1996        | 1.25<br>(1.15–1.37) |
| Espírito Santo   | 1997        | 1.26<br>(1.16–1.37) |
| Espírito Santo   | 1998        | 1.26<br>(1.16–1.36) |
| Espírito Santo   | 1999        | 1.27<br>(1.17–1.36) |
| Espírito Santo   | 2000        | 1.26<br>(1.18–1.34) |
| Espírito Santo   | 2001        | 1.3<br>(1.22–1.37)  |
| Espírito Santo   | 2002        | 1.3<br>(1.23–1.37)  |
| Espírito Santo   | 2003        | 1.3<br>(1.21–1.37)  |
| Espírito Santo   | 2004        | 1.29<br>(1.19–1.39) |
| Espírito Santo   | 2005        | 1.29<br>(1.17–1.4)  |
| Espírito Santo   | 2006        | 1.28<br>(1.16–1.41) |
| Espírito Santo   | 2007        | 1.28<br>(1.15–1.4)  |
| Espírito Santo   | 2008        | 1.27<br>(1.15–1.39) |
| Espírito Santo   | 2009        | 1.25<br>(1.13–1.37) |
| Espírito Santo   | 2010        | 1.24<br>(1.12–1.37) |
| Espírito Santo   | 2011        | 1.23<br>(1.1–1.36)  |
| Espírito Santo   | 2012        | 1.21<br>(1.09–1.34) |
| Espírito Santo   | 2013        | 1.19<br>(1.07–1.32) |
| Espírito Santo   | 2014        | 1.18<br>(1.07–1.3)  |
| Espírito Santo   | 2015        | 1.16<br>(1.06–1.28) |
| Espírito Santo   | 2016        | 1.15<br>(1.04–1.26) |
| Espírito Santo   | 2017        | 1.16<br>(1.05–1.28) |
| Goiás            | 1950        | 1.23<br>(1.14–1.32) |
| Goiás            | 1951        | 1.23<br>(1.14–1.32) |
| Goiás            | 1952        | 1.24<br>(1.14–1.33) |
| Goiás            | 1953        | 1.24<br>(1.14–1.34) |
| Goiás            | 1954        | 1.24<br>(1.13–1.35) |
| Goiás            | 1955        | 1.24<br>(1.13–1.35) |



**Table 15 Ratio of adjusted to unadjusted 5q0 values for scaled locations by year**

| <b>Geography</b> | <b>Year</b> | <b>Ratio</b>        |
|------------------|-------------|---------------------|
| Goiás            | 1956        | 1.22<br>(1.12–1.33) |
| Goiás            | 1957        | 1.22<br>(1.12–1.33) |
| Goiás            | 1958        | 1.23<br>(1.14–1.32) |
| Goiás            | 1959        | 1.23<br>(1.16–1.3)  |
| Goiás            | 1960        | 1.24<br>(1.18–1.29) |
| Goiás            | 1961        | 1.25<br>(1.19–1.29) |
| Goiás            | 1962        | 1.25<br>(1.18–1.31) |
| Goiás            | 1963        | 1.26<br>(1.17–1.34) |
| Goiás            | 1964        | 1.27<br>(1.17–1.37) |
| Goiás            | 1965        | 1.28<br>(1.18–1.37) |
| Goiás            | 1966        | 1.29<br>(1.19–1.38) |
| Goiás            | 1967        | 1.29<br>(1.2–1.39)  |
| Goiás            | 1968        | 1.3<br>(1.21–1.39)  |
| Goiás            | 1969        | 1.3<br>(1.22–1.39)  |
| Goiás            | 1970        | 1.31<br>(1.22–1.4)  |
| Goiás            | 1971        | 1.31<br>(1.22–1.41) |
| Goiás            | 1972        | 1.31<br>(1.22–1.4)  |
| Goiás            | 1973        | 1.3<br>(1.2–1.41)   |
| Goiás            | 1974        | 1.29<br>(1.19–1.4)  |
| Goiás            | 1975        | 1.28<br>(1.18–1.39) |
| Goiás            | 1976        | 1.27<br>(1.16–1.38) |
| Goiás            | 1977        | 1.25<br>(1.16–1.36) |
| Goiás            | 1978        | 1.24<br>(1.15–1.34) |
| Goiás            | 1979        | 1.25<br>(1.15–1.34) |
| Goiás            | 1980        | 1.28<br>(1.19–1.38) |
| Goiás            | 1981        | 1.26<br>(1.17–1.35) |
| Goiás            | 1982        | 1.26<br>(1.17–1.35) |
| Goiás            | 1983        | 1.28<br>(1.19–1.37) |
| Goiás            | 1984        | 1.27<br>(1.19–1.35) |
| Goiás            | 1985        | 1.3<br>(1.23–1.38)  |
| Goiás            | 1986        | 1.29<br>(1.22–1.36) |

**Table 15 Ratio of adjusted to unadjusted 5q0 values for scaled locations by year**

| <b>Geography</b> | <b>Year</b> | <b>Ratio</b>        |
|------------------|-------------|---------------------|
| Goiás            | 1987        | 1.28<br>(1.21–1.36) |
| Goiás            | 1988        | 1.26<br>(1.19–1.34) |
| Goiás            | 1989        | 1.27<br>(1.19–1.35) |
| Goiás            | 1990        | 1.27<br>(1.19–1.36) |
| Goiás            | 1991        | 1.29<br>(1.2–1.39)  |
| Goiás            | 1992        | 1.28<br>(1.18–1.38) |
| Goiás            | 1993        | 1.26<br>(1.16–1.35) |
| Goiás            | 1994        | 1.24<br>(1.15–1.34) |
| Goiás            | 1995        | 1.24<br>(1.15–1.35) |
| Goiás            | 1996        | 1.25<br>(1.15–1.37) |
| Goiás            | 1997        | 1.26<br>(1.16–1.37) |
| Goiás            | 1998        | 1.26<br>(1.16–1.36) |
| Goiás            | 1999        | 1.27<br>(1.17–1.36) |
| Goiás            | 2000        | 1.26<br>(1.18–1.34) |
| Goiás            | 2001        | 1.3<br>(1.22–1.37)  |
| Goiás            | 2002        | 1.31<br>(1.23–1.37) |
| Goiás            | 2003        | 1.3<br>(1.21–1.37)  |
| Goiás            | 2004        | 1.29<br>(1.19–1.39) |
| Goiás            | 2005        | 1.29<br>(1.17–1.4)  |
| Goiás            | 2006        | 1.28<br>(1.17–1.41) |
| Goiás            | 2007        | 1.28<br>(1.16–1.4)  |
| Goiás            | 2008        | 1.27<br>(1.15–1.39) |
| Goiás            | 2009        | 1.25<br>(1.13–1.38) |
| Goiás            | 2010        | 1.24<br>(1.12–1.37) |
| Goiás            | 2011        | 1.23<br>(1.1–1.36)  |
| Goiás            | 2012        | 1.21<br>(1.09–1.34) |
| Goiás            | 2013        | 1.19<br>(1.07–1.32) |
| Goiás            | 2014        | 1.18<br>(1.07–1.3)  |
| Goiás            | 2015        | 1.16<br>(1.06–1.28) |
| Goiás            | 2016        | 1.15<br>(1.04–1.26) |
| Goiás            | 2017        | 1.16<br>(1.05–1.28) |

**Table 15 Ratio of adjusted to unadjusted 5q0 values for scaled locations by year**

| <b>Geography</b> | <b>Year</b> | <b>Ratio</b>        |
|------------------|-------------|---------------------|
| Maranhão         | 1950        | 1.21<br>(1.13–1.29) |
| Maranhão         | 1951        | 1.21<br>(1.13–1.29) |
| Maranhão         | 1952        | 1.21<br>(1.13–1.3)  |
| Maranhão         | 1953        | 1.22<br>(1.12–1.31) |
| Maranhão         | 1954        | 1.22<br>(1.12–1.32) |
| Maranhão         | 1955        | 1.22<br>(1.12–1.32) |
| Maranhão         | 1956        | 1.2<br>(1.11–1.3)   |
| Maranhão         | 1957        | 1.2<br>(1.11–1.3)   |
| Maranhão         | 1958        | 1.21<br>(1.13–1.29) |
| Maranhão         | 1959        | 1.21<br>(1.15–1.27) |
| Maranhão         | 1960        | 1.22<br>(1.17–1.26) |
| Maranhão         | 1961        | 1.22<br>(1.18–1.26) |
| Maranhão         | 1962        | 1.23<br>(1.17–1.28) |
| Maranhão         | 1963        | 1.24<br>(1.16–1.31) |
| Maranhão         | 1964        | 1.25<br>(1.16–1.34) |
| Maranhão         | 1965        | 1.26<br>(1.16–1.35) |
| Maranhão         | 1966        | 1.27<br>(1.18–1.36) |
| Maranhão         | 1967        | 1.27<br>(1.18–1.36) |
| Maranhão         | 1968        | 1.28<br>(1.19–1.36) |
| Maranhão         | 1969        | 1.28<br>(1.2–1.36)  |
| Maranhão         | 1970        | 1.28<br>(1.21–1.37) |
| Maranhão         | 1971        | 1.28<br>(1.2–1.37)  |
| Maranhão         | 1972        | 1.28<br>(1.2–1.38)  |
| Maranhão         | 1973        | 1.28<br>(1.19–1.38) |
| Maranhão         | 1974        | 1.27<br>(1.18–1.38) |
| Maranhão         | 1975        | 1.26<br>(1.17–1.36) |
| Maranhão         | 1976        | 1.25<br>(1.15–1.35) |
| Maranhão         | 1977        | 1.24<br>(1.15–1.34) |
| Maranhão         | 1978        | 1.23<br>(1.14–1.32) |
| Maranhão         | 1979        | 1.23<br>(1.14–1.32) |
| Maranhão         | 1980        | 1.27<br>(1.18–1.36) |

**Table 15 Ratio of adjusted to unadjusted 5q0 values for scaled locations by year**

| <b>Geography</b> | <b>Year</b> | <b>Ratio</b>        |
|------------------|-------------|---------------------|
| Maranhão         | 1981        | 1.25<br>(1.16–1.33) |
| Maranhão         | 1982        | 1.25<br>(1.16–1.33) |
| Maranhão         | 1983        | 1.27<br>(1.18–1.35) |
| Maranhão         | 1984        | 1.26<br>(1.18–1.33) |
| Maranhão         | 1985        | 1.28<br>(1.22–1.36) |
| Maranhão         | 1986        | 1.27<br>(1.21–1.34) |
| Maranhão         | 1987        | 1.27<br>(1.2–1.34)  |
| Maranhão         | 1988        | 1.25<br>(1.18–1.32) |
| Maranhão         | 1989        | 1.26<br>(1.18–1.34) |
| Maranhão         | 1990        | 1.26<br>(1.18–1.35) |
| Maranhão         | 1991        | 1.28<br>(1.19–1.38) |
| Maranhão         | 1992        | 1.27<br>(1.18–1.37) |
| Maranhão         | 1993        | 1.25<br>(1.16–1.34) |
| Maranhão         | 1994        | 1.23<br>(1.14–1.33) |
| Maranhão         | 1995        | 1.24<br>(1.14–1.34) |
| Maranhão         | 1996        | 1.25<br>(1.15–1.36) |
| Maranhão         | 1997        | 1.25<br>(1.15–1.36) |
| Maranhão         | 1998        | 1.26<br>(1.16–1.35) |
| Maranhão         | 1999        | 1.26<br>(1.17–1.35) |
| Maranhão         | 2000        | 1.26<br>(1.18–1.34) |
| Maranhão         | 2001        | 1.29<br>(1.22–1.36) |
| Maranhão         | 2002        | 1.3<br>(1.23–1.36)  |
| Maranhão         | 2003        | 1.29<br>(1.21–1.37) |
| Maranhão         | 2004        | 1.29<br>(1.19–1.39) |
| Maranhão         | 2005        | 1.29<br>(1.17–1.4)  |
| Maranhão         | 2006        | 1.28<br>(1.16–1.4)  |
| Maranhão         | 2007        | 1.28<br>(1.15–1.4)  |
| Maranhão         | 2008        | 1.27<br>(1.15–1.39) |
| Maranhão         | 2009        | 1.25<br>(1.13–1.37) |
| Maranhão         | 2010        | 1.24<br>(1.12–1.37) |
| Maranhão         | 2011        | 1.22<br>(1.1–1.35)  |

**Table 15 Ratio of adjusted to unadjusted 5q0 values for scaled locations by year**

| <b>Geography</b> | <b>Year</b> | <b>Ratio</b>        |
|------------------|-------------|---------------------|
| Maranhão         | 2012        | 1.21<br>(1.08–1.34) |
| Maranhão         | 2013        | 1.19<br>(1.07–1.32) |
| Maranhão         | 2014        | 1.18<br>(1.07–1.3)  |
| Maranhão         | 2015        | 1.16<br>(1.06–1.28) |
| Maranhão         | 2016        | 1.15<br>(1.04–1.26) |
| Maranhão         | 2017        | 1.16<br>(1.05–1.28) |
| Mato Grosso      | 1950        | 1.23<br>(1.14–1.31) |
| Mato Grosso      | 1951        | 1.23<br>(1.13–1.32) |
| Mato Grosso      | 1952        | 1.23<br>(1.14–1.32) |
| Mato Grosso      | 1953        | 1.23<br>(1.13–1.34) |
| Mato Grosso      | 1954        | 1.23<br>(1.13–1.35) |
| Mato Grosso      | 1955        | 1.23<br>(1.13–1.34) |
| Mato Grosso      | 1956        | 1.22<br>(1.12–1.32) |
| Mato Grosso      | 1957        | 1.22<br>(1.12–1.32) |
| Mato Grosso      | 1958        | 1.22<br>(1.14–1.31) |
| Mato Grosso      | 1959        | 1.23<br>(1.16–1.3)  |
| Mato Grosso      | 1960        | 1.24<br>(1.18–1.28) |
| Mato Grosso      | 1961        | 1.24<br>(1.19–1.29) |
| Mato Grosso      | 1962        | 1.25<br>(1.18–1.31) |
| Mato Grosso      | 1963        | 1.26<br>(1.17–1.34) |
| Mato Grosso      | 1964        | 1.26<br>(1.17–1.37) |
| Mato Grosso      | 1965        | 1.27<br>(1.17–1.37) |
| Mato Grosso      | 1966        | 1.29<br>(1.19–1.38) |
| Mato Grosso      | 1967        | 1.29<br>(1.19–1.39) |
| Mato Grosso      | 1968        | 1.3<br>(1.21–1.39)  |
| Mato Grosso      | 1969        | 1.3<br>(1.22–1.39)  |
| Mato Grosso      | 1970        | 1.31<br>(1.22–1.39) |
| Mato Grosso      | 1971        | 1.31<br>(1.21–1.41) |
| Mato Grosso      | 1972        | 1.3<br>(1.21–1.4)   |
| Mato Grosso      | 1973        | 1.3<br>(1.2–1.4)    |
| Mato Grosso      | 1974        | 1.29<br>(1.19–1.4)  |

**Table 15 Ratio of adjusted to unadjusted 5q0 values for scaled locations by year**

| <b>Geography</b> | <b>Year</b> | <b>Ratio</b>        |
|------------------|-------------|---------------------|
| Mato Grosso      | 1975        | 1.28<br>(1.18–1.39) |
| Mato Grosso      | 1976        | 1.27<br>(1.16–1.38) |
| Mato Grosso      | 1977        | 1.25<br>(1.16–1.36) |
| Mato Grosso      | 1978        | 1.24<br>(1.15–1.34) |
| Mato Grosso      | 1979        | 1.25<br>(1.15–1.34) |
| Mato Grosso      | 1980        | 1.28<br>(1.19–1.38) |
| Mato Grosso      | 1981        | 1.26<br>(1.17–1.35) |
| Mato Grosso      | 1982        | 1.26<br>(1.17–1.35) |
| Mato Grosso      | 1983        | 1.28<br>(1.19–1.37) |
| Mato Grosso      | 1984        | 1.27<br>(1.18–1.35) |
| Mato Grosso      | 1985        | 1.3<br>(1.22–1.38)  |
| Mato Grosso      | 1986        | 1.28<br>(1.21–1.35) |
| Mato Grosso      | 1987        | 1.28<br>(1.21–1.35) |
| Mato Grosso      | 1988        | 1.26<br>(1.19–1.34) |
| Mato Grosso      | 1989        | 1.27<br>(1.19–1.35) |
| Mato Grosso      | 1990        | 1.27<br>(1.19–1.36) |
| Mato Grosso      | 1991        | 1.29<br>(1.2–1.39)  |
| Mato Grosso      | 1992        | 1.28<br>(1.18–1.38) |
| Mato Grosso      | 1993        | 1.25<br>(1.16–1.35) |
| Mato Grosso      | 1994        | 1.24<br>(1.15–1.34) |
| Mato Grosso      | 1995        | 1.24<br>(1.15–1.35) |
| Mato Grosso      | 1996        | 1.25<br>(1.15–1.37) |
| Mato Grosso      | 1997        | 1.25<br>(1.16–1.36) |
| Mato Grosso      | 1998        | 1.26<br>(1.16–1.36) |
| Mato Grosso      | 1999        | 1.27<br>(1.17–1.36) |
| Mato Grosso      | 2000        | 1.26<br>(1.18–1.34) |
| Mato Grosso      | 2001        | 1.3<br>(1.22–1.37)  |
| Mato Grosso      | 2002        | 1.3<br>(1.23–1.37)  |
| Mato Grosso      | 2003        | 1.3<br>(1.21–1.37)  |
| Mato Grosso      | 2004        | 1.29<br>(1.19–1.39) |
| Mato Grosso      | 2005        | 1.29<br>(1.17–1.4)  |

**Table 15 Ratio of adjusted to unadjusted 5q0 values for scaled locations by year**

| <b>Geography</b>   | <b>Year</b> | <b>Ratio</b>        |
|--------------------|-------------|---------------------|
| Mato Grosso        | 2006        | 1.28<br>(1.17–1.41) |
| Mato Grosso        | 2007        | 1.28<br>(1.15–1.4)  |
| Mato Grosso        | 2008        | 1.27<br>(1.15–1.39) |
| Mato Grosso        | 2009        | 1.25<br>(1.13–1.37) |
| Mato Grosso        | 2010        | 1.24<br>(1.12–1.37) |
| Mato Grosso        | 2011        | 1.23<br>(1.1–1.36)  |
| Mato Grosso        | 2012        | 1.21<br>(1.09–1.34) |
| Mato Grosso        | 2013        | 1.19<br>(1.07–1.32) |
| Mato Grosso        | 2014        | 1.18<br>(1.07–1.3)  |
| Mato Grosso        | 2015        | 1.16<br>(1.06–1.28) |
| Mato Grosso        | 2016        | 1.15<br>(1.04–1.26) |
| Mato Grosso        | 2017        | 1.16<br>(1.05–1.28) |
| Mato Grosso do Sul | 1950        | 1.24<br>(1.15–1.33) |
| Mato Grosso do Sul | 1951        | 1.25<br>(1.14–1.34) |
| Mato Grosso do Sul | 1952        | 1.25<br>(1.15–1.35) |
| Mato Grosso do Sul | 1953        | 1.25<br>(1.14–1.36) |
| Mato Grosso do Sul | 1954        | 1.25<br>(1.14–1.37) |
| Mato Grosso do Sul | 1955        | 1.25<br>(1.13–1.36) |
| Mato Grosso do Sul | 1956        | 1.23<br>(1.12–1.35) |
| Mato Grosso do Sul | 1957        | 1.23<br>(1.13–1.34) |
| Mato Grosso do Sul | 1958        | 1.23<br>(1.15–1.33) |
| Mato Grosso do Sul | 1959        | 1.24<br>(1.16–1.32) |
| Mato Grosso do Sul | 1960        | 1.25<br>(1.19–1.3)  |
| Mato Grosso do Sul | 1961        | 1.25<br>(1.2–1.3)   |
| Mato Grosso do Sul | 1962        | 1.26<br>(1.19–1.32) |
| Mato Grosso do Sul | 1963        | 1.27<br>(1.18–1.35) |
| Mato Grosso do Sul | 1964        | 1.28<br>(1.18–1.38) |
| Mato Grosso do Sul | 1965        | 1.29<br>(1.18–1.39) |
| Mato Grosso do Sul | 1966        | 1.3<br>(1.2–1.4)    |
| Mato Grosso do Sul | 1967        | 1.3<br>(1.2–1.4)    |
| Mato Grosso do Sul | 1968        | 1.31<br>(1.22–1.4)  |

**Table 15 Ratio of adjusted to unadjusted 5q0 values for scaled locations by year**

| <b>Geography</b>   | <b>Year</b> | <b>Ratio</b>        |
|--------------------|-------------|---------------------|
| Mato Grosso do Sul | 1969        | 1.31<br>(1.22–1.41) |
| Mato Grosso do Sul | 1970        | 1.32<br>(1.23–1.41) |
| Mato Grosso do Sul | 1971        | 1.31<br>(1.22–1.41) |
| Mato Grosso do Sul | 1972        | 1.31<br>(1.22–1.41) |
| Mato Grosso do Sul | 1973        | 1.31<br>(1.21–1.41) |
| Mato Grosso do Sul | 1974        | 1.29<br>(1.19–1.41) |
| Mato Grosso do Sul | 1975        | 1.28<br>(1.18–1.4)  |
| Mato Grosso do Sul | 1976        | 1.27<br>(1.16–1.38) |
| Mato Grosso do Sul | 1977        | 1.26<br>(1.16–1.36) |
| Mato Grosso do Sul | 1978        | 1.24<br>(1.15–1.34) |
| Mato Grosso do Sul | 1979        | 1.25<br>(1.15–1.35) |
| Mato Grosso do Sul | 1980        | 1.29<br>(1.19–1.39) |
| Mato Grosso do Sul | 1981        | 1.26<br>(1.17–1.35) |
| Mato Grosso do Sul | 1982        | 1.26<br>(1.17–1.36) |
| Mato Grosso do Sul | 1983        | 1.28<br>(1.19–1.37) |
| Mato Grosso do Sul | 1984        | 1.27<br>(1.19–1.35) |
| Mato Grosso do Sul | 1985        | 1.3<br>(1.23–1.38)  |
| Mato Grosso do Sul | 1986        | 1.29<br>(1.22–1.36) |
| Mato Grosso do Sul | 1987        | 1.28<br>(1.21–1.36) |
| Mato Grosso do Sul | 1988        | 1.26<br>(1.19–1.34) |
| Mato Grosso do Sul | 1989        | 1.27<br>(1.19–1.35) |
| Mato Grosso do Sul | 1990        | 1.28<br>(1.19–1.36) |
| Mato Grosso do Sul | 1991        | 1.29<br>(1.2–1.39)  |
| Mato Grosso do Sul | 1992        | 1.28<br>(1.18–1.38) |
| Mato Grosso do Sul | 1993        | 1.25<br>(1.16–1.35) |
| Mato Grosso do Sul | 1994        | 1.24<br>(1.15–1.34) |
| Mato Grosso do Sul | 1995        | 1.24<br>(1.15–1.35) |
| Mato Grosso do Sul | 1996        | 1.25<br>(1.15–1.37) |
| Mato Grosso do Sul | 1997        | 1.26<br>(1.16–1.36) |
| Mato Grosso do Sul | 1998        | 1.26<br>(1.16–1.36) |
| Mato Grosso do Sul | 1999        | 1.27<br>(1.17–1.36) |



**Table 15 Ratio of adjusted to unadjusted 5q0 values for scaled locations by year**

| <b>Geography</b>   | <b>Year</b> | <b>Ratio</b>        |
|--------------------|-------------|---------------------|
| Mato Grosso do Sul | 2000        | 1.26<br>(1.18–1.34) |
| Mato Grosso do Sul | 2001        | 1.29<br>(1.22–1.36) |
| Mato Grosso do Sul | 2002        | 1.3<br>(1.23–1.37)  |
| Mato Grosso do Sul | 2003        | 1.3<br>(1.21–1.37)  |
| Mato Grosso do Sul | 2004        | 1.29<br>(1.19–1.39) |
| Mato Grosso do Sul | 2005        | 1.29<br>(1.17–1.4)  |
| Mato Grosso do Sul | 2006        | 1.28<br>(1.16–1.41) |
| Mato Grosso do Sul | 2007        | 1.28<br>(1.15–1.4)  |
| Mato Grosso do Sul | 2008        | 1.27<br>(1.15–1.39) |
| Mato Grosso do Sul | 2009        | 1.25<br>(1.13–1.37) |
| Mato Grosso do Sul | 2010        | 1.24<br>(1.12–1.37) |
| Mato Grosso do Sul | 2011        | 1.23<br>(1.1–1.36)  |
| Mato Grosso do Sul | 2012        | 1.21<br>(1.09–1.34) |
| Mato Grosso do Sul | 2013        | 1.19<br>(1.07–1.32) |
| Mato Grosso do Sul | 2014        | 1.18<br>(1.07–1.3)  |
| Mato Grosso do Sul | 2015        | 1.16<br>(1.06–1.28) |
| Mato Grosso do Sul | 2016        | 1.15<br>(1.04–1.26) |
| Mato Grosso do Sul | 2017        | 1.16<br>(1.05–1.28) |
| Minas Gerais       | 1950        | 1.24<br>(1.15–1.32) |
| Minas Gerais       | 1951        | 1.24<br>(1.14–1.33) |
| Minas Gerais       | 1952        | 1.24<br>(1.15–1.34) |
| Minas Gerais       | 1953        | 1.24<br>(1.14–1.35) |
| Minas Gerais       | 1954        | 1.24<br>(1.14–1.36) |
| Minas Gerais       | 1955        | 1.24<br>(1.13–1.36) |
| Minas Gerais       | 1956        | 1.23<br>(1.12–1.34) |
| Minas Gerais       | 1957        | 1.23<br>(1.13–1.34) |
| Minas Gerais       | 1958        | 1.23<br>(1.14–1.33) |
| Minas Gerais       | 1959        | 1.24<br>(1.16–1.31) |
| Minas Gerais       | 1960        | 1.24<br>(1.19–1.29) |
| Minas Gerais       | 1961        | 1.25<br>(1.2–1.3)   |
| Minas Gerais       | 1962        | 1.26<br>(1.18–1.32) |

**Table 15 Ratio of adjusted to unadjusted 5q0 values for scaled locations by year**

| <b>Geography</b> | <b>Year</b> | <b>Ratio</b>        |
|------------------|-------------|---------------------|
| Minas Gerais     | 1963        | 1.26<br>(1.17–1.35) |
| Minas Gerais     | 1964        | 1.27<br>(1.17–1.38) |
| Minas Gerais     | 1965        | 1.28<br>(1.18–1.38) |
| Minas Gerais     | 1966        | 1.29<br>(1.19–1.39) |
| Minas Gerais     | 1967        | 1.3<br>(1.2–1.39)   |
| Minas Gerais     | 1968        | 1.3<br>(1.21–1.39)  |
| Minas Gerais     | 1969        | 1.31<br>(1.22–1.4)  |
| Minas Gerais     | 1970        | 1.31<br>(1.22–1.4)  |
| Minas Gerais     | 1971        | 1.31<br>(1.22–1.41) |
| Minas Gerais     | 1972        | 1.31<br>(1.22–1.4)  |
| Minas Gerais     | 1973        | 1.3<br>(1.2–1.41)   |
| Minas Gerais     | 1974        | 1.29<br>(1.19–1.4)  |
| Minas Gerais     | 1975        | 1.28<br>(1.18–1.39) |
| Minas Gerais     | 1976        | 1.27<br>(1.16–1.38) |
| Minas Gerais     | 1977        | 1.26<br>(1.16–1.36) |
| Minas Gerais     | 1978        | 1.24<br>(1.15–1.34) |
| Minas Gerais     | 1979        | 1.25<br>(1.15–1.34) |
| Minas Gerais     | 1980        | 1.28<br>(1.19–1.38) |
| Minas Gerais     | 1981        | 1.26<br>(1.17–1.35) |
| Minas Gerais     | 1982        | 1.26<br>(1.17–1.35) |
| Minas Gerais     | 1983        | 1.28<br>(1.19–1.37) |
| Minas Gerais     | 1984        | 1.27<br>(1.18–1.35) |
| Minas Gerais     | 1985        | 1.3<br>(1.23–1.38)  |
| Minas Gerais     | 1986        | 1.29<br>(1.22–1.35) |
| Minas Gerais     | 1987        | 1.28<br>(1.21–1.35) |
| Minas Gerais     | 1988        | 1.26<br>(1.19–1.34) |
| Minas Gerais     | 1989        | 1.27<br>(1.19–1.35) |
| Minas Gerais     | 1990        | 1.27<br>(1.19–1.36) |
| Minas Gerais     | 1991        | 1.29<br>(1.2–1.39)  |
| Minas Gerais     | 1992        | 1.28<br>(1.18–1.38) |
| Minas Gerais     | 1993        | 1.25<br>(1.16–1.35) |

**Table 15 Ratio of adjusted to unadjusted 5q0 values for scaled locations by year**

| <b>Geography</b> | <b>Year</b> | <b>Ratio</b>        |
|------------------|-------------|---------------------|
| Minas Gerais     | 1994        | 1.24<br>(1.15–1.34) |
| Minas Gerais     | 1995        | 1.24<br>(1.15–1.35) |
| Minas Gerais     | 1996        | 1.25<br>(1.15–1.36) |
| Minas Gerais     | 1997        | 1.26<br>(1.16–1.36) |
| Minas Gerais     | 1998        | 1.26<br>(1.16–1.36) |
| Minas Gerais     | 1999        | 1.27<br>(1.17–1.36) |
| Minas Gerais     | 2000        | 1.26<br>(1.18–1.34) |
| Minas Gerais     | 2001        | 1.29<br>(1.22–1.36) |
| Minas Gerais     | 2002        | 1.3<br>(1.23–1.37)  |
| Minas Gerais     | 2003        | 1.3<br>(1.21–1.37)  |
| Minas Gerais     | 2004        | 1.29<br>(1.19–1.39) |
| Minas Gerais     | 2005        | 1.29<br>(1.17–1.4)  |
| Minas Gerais     | 2006        | 1.28<br>(1.16–1.41) |
| Minas Gerais     | 2007        | 1.28<br>(1.15–1.4)  |
| Minas Gerais     | 2008        | 1.27<br>(1.15–1.39) |
| Minas Gerais     | 2009        | 1.25<br>(1.13–1.37) |
| Minas Gerais     | 2010        | 1.24<br>(1.12–1.37) |
| Minas Gerais     | 2011        | 1.23<br>(1.1–1.36)  |
| Minas Gerais     | 2012        | 1.21<br>(1.09–1.34) |
| Minas Gerais     | 2013        | 1.19<br>(1.07–1.32) |
| Minas Gerais     | 2014        | 1.18<br>(1.07–1.3)  |
| Minas Gerais     | 2015        | 1.16<br>(1.06–1.28) |
| Minas Gerais     | 2016        | 1.15<br>(1.04–1.26) |
| Minas Gerais     | 2017        | 1.16<br>(1.05–1.28) |
| Pará             | 1950        | 1.23<br>(1.14–1.32) |
| Pará             | 1951        | 1.23<br>(1.14–1.32) |
| Pará             | 1952        | 1.24<br>(1.14–1.33) |
| Pará             | 1953        | 1.24<br>(1.14–1.34) |
| Pará             | 1954        | 1.24<br>(1.13–1.35) |
| Pará             | 1955        | 1.24<br>(1.13–1.35) |
| Pará             | 1956        | 1.22<br>(1.12–1.33) |

**Table 15 Ratio of adjusted to unadjusted 5q0 values for scaled locations by year**

| <b>Geography</b> | <b>Year</b> | <b>Ratio</b>        |
|------------------|-------------|---------------------|
| Pará             | 1957        | 1.22<br>(1.13–1.32) |
| Pará             | 1958        | 1.22<br>(1.14–1.31) |
| Pará             | 1959        | 1.23<br>(1.16–1.3)  |
| Pará             | 1960        | 1.24<br>(1.18–1.28) |
| Pará             | 1961        | 1.24<br>(1.2–1.29)  |
| Pará             | 1962        | 1.25<br>(1.18–1.31) |
| Pará             | 1963        | 1.26<br>(1.17–1.34) |
| Pará             | 1964        | 1.27<br>(1.17–1.37) |
| Pará             | 1965        | 1.27<br>(1.17–1.37) |
| Pará             | 1966        | 1.29<br>(1.19–1.38) |
| Pará             | 1967        | 1.29<br>(1.19–1.39) |
| Pará             | 1968        | 1.29<br>(1.21–1.38) |
| Pará             | 1969        | 1.3<br>(1.21–1.39)  |
| Pará             | 1970        | 1.3<br>(1.22–1.39)  |
| Pará             | 1971        | 1.3<br>(1.21–1.39)  |
| Pará             | 1972        | 1.3<br>(1.21–1.39)  |
| Pará             | 1973        | 1.29<br>(1.2–1.4)   |
| Pará             | 1974        | 1.28<br>(1.19–1.39) |
| Pará             | 1975        | 1.27<br>(1.17–1.38) |
| Pará             | 1976        | 1.26<br>(1.16–1.37) |
| Pará             | 1977        | 1.25<br>(1.15–1.35) |
| Pará             | 1978        | 1.24<br>(1.14–1.33) |
| Pará             | 1979        | 1.24<br>(1.15–1.33) |
| Pará             | 1980        | 1.28<br>(1.18–1.37) |
| Pará             | 1981        | 1.25<br>(1.16–1.34) |
| Pará             | 1982        | 1.25<br>(1.17–1.34) |
| Pará             | 1983        | 1.27<br>(1.19–1.36) |
| Pará             | 1984        | 1.26<br>(1.18–1.34) |
| Pará             | 1985        | 1.29<br>(1.22–1.37) |
| Pará             | 1986        | 1.28<br>(1.21–1.35) |
| Pará             | 1987        | 1.28<br>(1.21–1.35) |

**Table 15 Ratio of adjusted to unadjusted 5q0 values for scaled locations by year**

| <b>Geography</b> | <b>Year</b> | <b>Ratio</b>        |
|------------------|-------------|---------------------|
| Pará             | 1988        | 1.26<br>(1.19–1.33) |
| Pará             | 1989        | 1.27<br>(1.19–1.35) |
| Pará             | 1990        | 1.27<br>(1.18–1.36) |
| Pará             | 1991        | 1.29<br>(1.2–1.39)  |
| Pará             | 1992        | 1.27<br>(1.18–1.38) |
| Pará             | 1993        | 1.25<br>(1.16–1.35) |
| Pará             | 1994        | 1.23<br>(1.15–1.33) |
| Pará             | 1995        | 1.24<br>(1.14–1.35) |
| Pará             | 1996        | 1.25<br>(1.15–1.36) |
| Pará             | 1997        | 1.25<br>(1.16–1.36) |
| Pará             | 1998        | 1.26<br>(1.16–1.36) |
| Pará             | 1999        | 1.26<br>(1.17–1.35) |
| Pará             | 2000        | 1.26<br>(1.18–1.34) |
| Pará             | 2001        | 1.29<br>(1.22–1.36) |
| Pará             | 2002        | 1.3<br>(1.23–1.36)  |
| Pará             | 2003        | 1.29<br>(1.21–1.37) |
| Pará             | 2004        | 1.29<br>(1.19–1.39) |
| Pará             | 2005        | 1.29<br>(1.17–1.4)  |
| Pará             | 2006        | 1.28<br>(1.16–1.41) |
| Pará             | 2007        | 1.28<br>(1.15–1.4)  |
| Pará             | 2008        | 1.27<br>(1.15–1.39) |
| Pará             | 2009        | 1.25<br>(1.13–1.37) |
| Pará             | 2010        | 1.24<br>(1.12–1.37) |
| Pará             | 2011        | 1.22<br>(1.1–1.35)  |
| Pará             | 2012        | 1.21<br>(1.08–1.34) |
| Pará             | 2013        | 1.19<br>(1.07–1.32) |
| Pará             | 2014        | 1.18<br>(1.07–1.3)  |
| Pará             | 2015        | 1.16<br>(1.06–1.28) |
| Pará             | 2016        | 1.15<br>(1.04–1.26) |
| Pará             | 2017        | 1.16<br>(1.05–1.28) |
| Paraíba          | 1950        | 1.22<br>(1.13–1.28) |

**Table 15 Ratio of adjusted to unadjusted 5q0 values for scaled locations by year**

| <b>Geography</b> | <b>Year</b> | <b>Ratio</b>        |
|------------------|-------------|---------------------|
| Paraíba          | 1951        | 1.22<br>(1.13–1.29) |
| Paraíba          | 1952        | 1.22<br>(1.13–1.3)  |
| Paraíba          | 1953        | 1.22<br>(1.13–1.32) |
| Paraíba          | 1954        | 1.22<br>(1.13–1.33) |
| Paraíba          | 1955        | 1.22<br>(1.12–1.32) |
| Paraíba          | 1956        | 1.21<br>(1.11–1.31) |
| Paraíba          | 1957        | 1.21<br>(1.12–1.31) |
| Paraíba          | 1958        | 1.21<br>(1.13–1.3)  |
| Paraíba          | 1959        | 1.22<br>(1.15–1.28) |
| Paraíba          | 1960        | 1.23<br>(1.17–1.27) |
| Paraíba          | 1961        | 1.23<br>(1.19–1.27) |
| Paraíba          | 1962        | 1.24<br>(1.17–1.29) |
| Paraíba          | 1963        | 1.25<br>(1.16–1.32) |
| Paraíba          | 1964        | 1.26<br>(1.16–1.35) |
| Paraíba          | 1965        | 1.26<br>(1.17–1.36) |
| Paraíba          | 1966        | 1.28<br>(1.18–1.37) |
| Paraíba          | 1967        | 1.28<br>(1.19–1.37) |
| Paraíba          | 1968        | 1.29<br>(1.2–1.37)  |
| Paraíba          | 1969        | 1.29<br>(1.21–1.37) |
| Paraíba          | 1970        | 1.29<br>(1.21–1.38) |
| Paraíba          | 1971        | 1.29<br>(1.21–1.38) |
| Paraíba          | 1972        | 1.29<br>(1.21–1.38) |
| Paraíba          | 1973        | 1.29<br>(1.19–1.39) |
| Paraíba          | 1974        | 1.28<br>(1.18–1.38) |
| Paraíba          | 1975        | 1.27<br>(1.17–1.38) |
| Paraíba          | 1976        | 1.26<br>(1.15–1.36) |
| Paraíba          | 1977        | 1.24<br>(1.15–1.35) |
| Paraíba          | 1978        | 1.23<br>(1.14–1.33) |
| Paraíba          | 1979        | 1.24<br>(1.14–1.33) |
| Paraíba          | 1980        | 1.27<br>(1.18–1.37) |
| Paraíba          | 1981        | 1.25<br>(1.16–1.34) |

**Table 15 Ratio of adjusted to unadjusted 5q0 values for scaled locations by year**

| <b>Geography</b> | <b>Year</b> | <b>Ratio</b>        |
|------------------|-------------|---------------------|
| Paraíba          | 1982        | 1.25<br>(1.17–1.34) |
| Paraíba          | 1983        | 1.27<br>(1.19–1.36) |
| Paraíba          | 1984        | 1.26<br>(1.18–1.34) |
| Paraíba          | 1985        | 1.29<br>(1.22–1.37) |
| Paraíba          | 1986        | 1.28<br>(1.21–1.34) |
| Paraíba          | 1987        | 1.28<br>(1.21–1.35) |
| Paraíba          | 1988        | 1.26<br>(1.19–1.33) |
| Paraíba          | 1989        | 1.26<br>(1.19–1.34) |
| Paraíba          | 1990        | 1.27<br>(1.18–1.36) |
| Paraíba          | 1991        | 1.29<br>(1.2–1.39)  |
| Paraíba          | 1992        | 1.27<br>(1.18–1.38) |
| Paraíba          | 1993        | 1.25<br>(1.16–1.35) |
| Paraíba          | 1994        | 1.23<br>(1.15–1.33) |
| Paraíba          | 1995        | 1.24<br>(1.14–1.35) |
| Paraíba          | 1996        | 1.25<br>(1.15–1.36) |
| Paraíba          | 1997        | 1.25<br>(1.16–1.36) |
| Paraíba          | 1998        | 1.26<br>(1.16–1.36) |
| Paraíba          | 1999        | 1.26<br>(1.17–1.36) |
| Paraíba          | 2000        | 1.26<br>(1.18–1.34) |
| Paraíba          | 2001        | 1.29<br>(1.22–1.36) |
| Paraíba          | 2002        | 1.3<br>(1.23–1.36)  |
| Paraíba          | 2003        | 1.3<br>(1.21–1.37)  |
| Paraíba          | 2004        | 1.29<br>(1.19–1.39) |
| Paraíba          | 2005        | 1.29<br>(1.17–1.4)  |
| Paraíba          | 2006        | 1.28<br>(1.16–1.41) |
| Paraíba          | 2007        | 1.28<br>(1.15–1.4)  |
| Paraíba          | 2008        | 1.27<br>(1.15–1.39) |
| Paraíba          | 2009        | 1.25<br>(1.13–1.37) |
| Paraíba          | 2010        | 1.24<br>(1.12–1.37) |
| Paraíba          | 2011        | 1.22<br>(1.1–1.36)  |
| Paraíba          | 2012        | 1.21<br>(1.09–1.34) |

**Table 15 Ratio of adjusted to unadjusted 5q0 values for scaled locations by year**

| <b>Geography</b> | <b>Year</b> | <b>Ratio</b>        |
|------------------|-------------|---------------------|
| Paraíba          | 2013        | 1.19<br>(1.07–1.32) |
| Paraíba          | 2014        | 1.18<br>(1.07–1.3)  |
| Paraíba          | 2015        | 1.16<br>(1.06–1.28) |
| Paraíba          | 2016        | 1.15<br>(1.04–1.26) |
| Paraíba          | 2017        | 1.16<br>(1.05–1.28) |
| Paraná           | 1950        | 1.24<br>(1.15–1.32) |
| Paraná           | 1951        | 1.24<br>(1.14–1.33) |
| Paraná           | 1952        | 1.24<br>(1.15–1.34) |
| Paraná           | 1953        | 1.24<br>(1.14–1.35) |
| Paraná           | 1954        | 1.25<br>(1.14–1.36) |
| Paraná           | 1955        | 1.24<br>(1.13–1.36) |
| Paraná           | 1956        | 1.23<br>(1.12–1.34) |
| Paraná           | 1957        | 1.23<br>(1.13–1.34) |
| Paraná           | 1958        | 1.23<br>(1.14–1.33) |
| Paraná           | 1959        | 1.24<br>(1.16–1.31) |
| Paraná           | 1960        | 1.24<br>(1.19–1.29) |
| Paraná           | 1961        | 1.25<br>(1.2–1.3)   |
| Paraná           | 1962        | 1.26<br>(1.18–1.32) |
| Paraná           | 1963        | 1.26<br>(1.18–1.35) |
| Paraná           | 1964        | 1.27<br>(1.17–1.38) |
| Paraná           | 1965        | 1.28<br>(1.18–1.39) |
| Paraná           | 1966        | 1.29<br>(1.19–1.39) |
| Paraná           | 1967        | 1.3<br>(1.2–1.4)    |
| Paraná           | 1968        | 1.31<br>(1.21–1.4)  |
| Paraná           | 1969        | 1.31<br>(1.22–1.4)  |
| Paraná           | 1970        | 1.31<br>(1.23–1.4)  |
| Paraná           | 1971        | 1.31<br>(1.22–1.41) |
| Paraná           | 1972        | 1.31<br>(1.22–1.41) |
| Paraná           | 1973        | 1.3<br>(1.2–1.41)   |
| Paraná           | 1974        | 1.29<br>(1.19–1.4)  |
| Paraná           | 1975        | 1.28<br>(1.18–1.39) |



**Table 15 Ratio of adjusted to unadjusted 5q0 values for scaled locations by year**

| <b>Geography</b> | <b>Year</b> | <b>Ratio</b>        |
|------------------|-------------|---------------------|
| Paraná           | 1976        | 1.27<br>(1.16–1.38) |
| Paraná           | 1977        | 1.26<br>(1.16–1.36) |
| Paraná           | 1978        | 1.24<br>(1.15–1.34) |
| Paraná           | 1979        | 1.25<br>(1.15–1.34) |
| Paraná           | 1980        | 1.28<br>(1.19–1.38) |
| Paraná           | 1981        | 1.26<br>(1.17–1.35) |
| Paraná           | 1982        | 1.26<br>(1.17–1.35) |
| Paraná           | 1983        | 1.28<br>(1.19–1.37) |
| Paraná           | 1984        | 1.27<br>(1.19–1.35) |
| Paraná           | 1985        | 1.3<br>(1.23–1.38)  |
| Paraná           | 1986        | 1.29<br>(1.22–1.36) |
| Paraná           | 1987        | 1.28<br>(1.21–1.36) |
| Paraná           | 1988        | 1.26<br>(1.19–1.34) |
| Paraná           | 1989        | 1.27<br>(1.19–1.35) |
| Paraná           | 1990        | 1.27<br>(1.19–1.36) |
| Paraná           | 1991        | 1.29<br>(1.2–1.39)  |
| Paraná           | 1992        | 1.28<br>(1.18–1.39) |
| Paraná           | 1993        | 1.26<br>(1.16–1.36) |
| Paraná           | 1994        | 1.24<br>(1.15–1.34) |
| Paraná           | 1995        | 1.24<br>(1.15–1.35) |
| Paraná           | 1996        | 1.25<br>(1.15–1.37) |
| Paraná           | 1997        | 1.26<br>(1.16–1.37) |
| Paraná           | 1998        | 1.26<br>(1.16–1.36) |
| Paraná           | 1999        | 1.27<br>(1.17–1.36) |
| Paraná           | 2000        | 1.26<br>(1.18–1.34) |
| Paraná           | 2001        | 1.3<br>(1.22–1.37)  |
| Paraná           | 2002        | 1.3<br>(1.23–1.37)  |
| Paraná           | 2003        | 1.3<br>(1.21–1.37)  |
| Paraná           | 2004        | 1.29<br>(1.19–1.39) |
| Paraná           | 2005        | 1.29<br>(1.17–1.4)  |
| Paraná           | 2006        | 1.28<br>(1.16–1.41) |

**Table 15 Ratio of adjusted to unadjusted 5q0 values for scaled locations by year**

| <b>Geography</b> | <b>Year</b> | <b>Ratio</b>        |
|------------------|-------------|---------------------|
| Paraná           | 2007        | 1.28<br>(1.15–1.4)  |
| Paraná           | 2008        | 1.27<br>(1.15–1.39) |
| Paraná           | 2009        | 1.25<br>(1.13–1.38) |
| Paraná           | 2010        | 1.24<br>(1.12–1.37) |
| Paraná           | 2011        | 1.23<br>(1.1–1.36)  |
| Paraná           | 2012        | 1.21<br>(1.09–1.34) |
| Paraná           | 2013        | 1.19<br>(1.07–1.32) |
| Paraná           | 2014        | 1.18<br>(1.07–1.3)  |
| Paraná           | 2015        | 1.16<br>(1.06–1.28) |
| Paraná           | 2016        | 1.15<br>(1.04–1.26) |
| Paraná           | 2017        | 1.16<br>(1.05–1.28) |
| Pernambuco       | 1950        | 1.21<br>(1.13–1.27) |
| Pernambuco       | 1951        | 1.21<br>(1.13–1.28) |
| Pernambuco       | 1952        | 1.21<br>(1.13–1.29) |
| Pernambuco       | 1953        | 1.21<br>(1.12–1.31) |
| Pernambuco       | 1954        | 1.22<br>(1.12–1.31) |
| Pernambuco       | 1955        | 1.21<br>(1.12–1.31) |
| Pernambuco       | 1956        | 1.2<br>(1.11–1.3)   |
| Pernambuco       | 1957        | 1.2<br>(1.12–1.3)   |
| Pernambuco       | 1958        | 1.21<br>(1.13–1.29) |
| Pernambuco       | 1959        | 1.21<br>(1.15–1.28) |
| Pernambuco       | 1960        | 1.22<br>(1.17–1.26) |
| Pernambuco       | 1961        | 1.23<br>(1.18–1.26) |
| Pernambuco       | 1962        | 1.23<br>(1.17–1.29) |
| Pernambuco       | 1963        | 1.24<br>(1.16–1.31) |
| Pernambuco       | 1964        | 1.25<br>(1.16–1.34) |
| Pernambuco       | 1965        | 1.26<br>(1.16–1.35) |
| Pernambuco       | 1966        | 1.27<br>(1.18–1.36) |
| Pernambuco       | 1967        | 1.27<br>(1.19–1.36) |
| Pernambuco       | 1968        | 1.28<br>(1.2–1.36)  |
| Pernambuco       | 1969        | 1.28<br>(1.21–1.36) |

**Table 15 Ratio of adjusted to unadjusted 5q0 values for scaled locations by year**

| <b>Geography</b> | <b>Year</b> | <b>Ratio</b>        |
|------------------|-------------|---------------------|
| Pernambuco       | 1970        | 1.28<br>(1.21–1.36) |
| Pernambuco       | 1971        | 1.28<br>(1.2–1.37)  |
| Pernambuco       | 1972        | 1.28<br>(1.2–1.37)  |
| Pernambuco       | 1973        | 1.28<br>(1.19–1.38) |
| Pernambuco       | 1974        | 1.27<br>(1.18–1.37) |
| Pernambuco       | 1975        | 1.26<br>(1.16–1.37) |
| Pernambuco       | 1976        | 1.25<br>(1.15–1.36) |
| Pernambuco       | 1977        | 1.24<br>(1.15–1.34) |
| Pernambuco       | 1978        | 1.23<br>(1.14–1.32) |
| Pernambuco       | 1979        | 1.23<br>(1.14–1.32) |
| Pernambuco       | 1980        | 1.27<br>(1.18–1.36) |
| Pernambuco       | 1981        | 1.25<br>(1.16–1.33) |
| Pernambuco       | 1982        | 1.25<br>(1.17–1.34) |
| Pernambuco       | 1983        | 1.27<br>(1.18–1.35) |
| Pernambuco       | 1984        | 1.26<br>(1.18–1.33) |
| Pernambuco       | 1985        | 1.29<br>(1.22–1.36) |
| Pernambuco       | 1986        | 1.27<br>(1.21–1.34) |
| Pernambuco       | 1987        | 1.27<br>(1.2–1.34)  |
| Pernambuco       | 1988        | 1.25<br>(1.18–1.33) |
| Pernambuco       | 1989        | 1.26<br>(1.18–1.34) |
| Pernambuco       | 1990        | 1.27<br>(1.18–1.35) |
| Pernambuco       | 1991        | 1.28<br>(1.19–1.38) |
| Pernambuco       | 1992        | 1.27<br>(1.18–1.37) |
| Pernambuco       | 1993        | 1.25<br>(1.16–1.34) |
| Pernambuco       | 1994        | 1.23<br>(1.15–1.33) |
| Pernambuco       | 1995        | 1.24<br>(1.14–1.34) |
| Pernambuco       | 1996        | 1.25<br>(1.15–1.36) |
| Pernambuco       | 1997        | 1.25<br>(1.15–1.36) |
| Pernambuco       | 1998        | 1.26<br>(1.16–1.35) |
| Pernambuco       | 1999        | 1.26<br>(1.17–1.35) |
| Pernambuco       | 2000        | 1.26<br>(1.18–1.34) |

**Table 15 Ratio of adjusted to unadjusted 5q0 values for scaled locations by year**

| <b>Geography</b> | <b>Year</b> | <b>Ratio</b>        |
|------------------|-------------|---------------------|
| Pernambuco       | 2001        | 1.29<br>(1.22–1.36) |
| Pernambuco       | 2002        | 1.3<br>(1.23–1.36)  |
| Pernambuco       | 2003        | 1.29<br>(1.21–1.37) |
| Pernambuco       | 2004        | 1.29<br>(1.19–1.39) |
| Pernambuco       | 2005        | 1.29<br>(1.17–1.4)  |
| Pernambuco       | 2006        | 1.28<br>(1.16–1.4)  |
| Pernambuco       | 2007        | 1.28<br>(1.15–1.4)  |
| Pernambuco       | 2008        | 1.27<br>(1.15–1.39) |
| Pernambuco       | 2009        | 1.25<br>(1.13–1.37) |
| Pernambuco       | 2010        | 1.24<br>(1.12–1.36) |
| Pernambuco       | 2011        | 1.22<br>(1.1–1.35)  |
| Pernambuco       | 2012        | 1.21<br>(1.08–1.34) |
| Pernambuco       | 2013        | 1.19<br>(1.07–1.32) |
| Pernambuco       | 2014        | 1.18<br>(1.07–1.3)  |
| Pernambuco       | 2015        | 1.16<br>(1.06–1.28) |
| Pernambuco       | 2016        | 1.15<br>(1.04–1.26) |
| Pernambuco       | 2017        | 1.16<br>(1.05–1.28) |
| Piaui            | 1950        | 1.23<br>(1.14–1.31) |
| Piaui            | 1951        | 1.23<br>(1.14–1.32) |
| Piaui            | 1952        | 1.23<br>(1.14–1.33) |
| Piaui            | 1953        | 1.23<br>(1.13–1.34) |
| Piaui            | 1954        | 1.23<br>(1.13–1.35) |
| Piaui            | 1955        | 1.23<br>(1.13–1.34) |
| Piaui            | 1956        | 1.22<br>(1.12–1.33) |
| Piaui            | 1957        | 1.22<br>(1.12–1.32) |
| Piaui            | 1958        | 1.22<br>(1.14–1.31) |
| Piaui            | 1959        | 1.23<br>(1.16–1.3)  |
| Piaui            | 1960        | 1.23<br>(1.18–1.28) |
| Piaui            | 1961        | 1.24<br>(1.19–1.28) |
| Piaui            | 1962        | 1.24<br>(1.18–1.3)  |
| Piaui            | 1963        | 1.25<br>(1.17–1.33) |

**Table 15 Ratio of adjusted to unadjusted 5q0 values for scaled locations by year**

| <b>Geography</b> | <b>Year</b> | <b>Ratio</b>        |
|------------------|-------------|---------------------|
| Piaui            | 1964        | 1.26<br>(1.17–1.36) |
| Piaui            | 1965        | 1.27<br>(1.17–1.37) |
| Piaui            | 1966        | 1.28<br>(1.19–1.37) |
| Piaui            | 1967        | 1.28<br>(1.19–1.37) |
| Piaui            | 1968        | 1.29<br>(1.21–1.37) |
| Piaui            | 1969        | 1.29<br>(1.21–1.38) |
| Piaui            | 1970        | 1.3<br>(1.22–1.38)  |
| Piaui            | 1971        | 1.3<br>(1.21–1.39)  |
| Piaui            | 1972        | 1.29<br>(1.21–1.39) |
| Piaui            | 1973        | 1.29<br>(1.19–1.39) |
| Piaui            | 1974        | 1.28<br>(1.19–1.39) |
| Piaui            | 1975        | 1.27<br>(1.17–1.38) |
| Piaui            | 1976        | 1.26<br>(1.16–1.37) |
| Piaui            | 1977        | 1.25<br>(1.15–1.35) |
| Piaui            | 1978        | 1.23<br>(1.14–1.33) |
| Piaui            | 1979        | 1.24<br>(1.15–1.33) |
| Piaui            | 1980        | 1.28<br>(1.18–1.37) |
| Piaui            | 1981        | 1.25<br>(1.16–1.34) |
| Piaui            | 1982        | 1.25<br>(1.17–1.34) |
| Piaui            | 1983        | 1.27<br>(1.19–1.36) |
| Piaui            | 1984        | 1.26<br>(1.18–1.34) |
| Piaui            | 1985        | 1.29<br>(1.22–1.37) |
| Piaui            | 1986        | 1.28<br>(1.21–1.35) |
| Piaui            | 1987        | 1.28<br>(1.21–1.35) |
| Piaui            | 1988        | 1.26<br>(1.19–1.33) |
| Piaui            | 1989        | 1.27<br>(1.19–1.35) |
| Piaui            | 1990        | 1.27<br>(1.18–1.36) |
| Piaui            | 1991        | 1.29<br>(1.2–1.39)  |
| Piaui            | 1992        | 1.27<br>(1.18–1.38) |
| Piaui            | 1993        | 1.25<br>(1.16–1.35) |
| Piaui            | 1994        | 1.23<br>(1.15–1.33) |

**Table 15 Ratio of adjusted to unadjusted 5q0 values for scaled locations by year**

| <b>Geography</b> | <b>Year</b> | <b>Ratio</b>        |
|------------------|-------------|---------------------|
| Piaui            | 1995        | 1.24<br>(1.15–1.34) |
| Piaui            | 1996        | 1.25<br>(1.15–1.36) |
| Piaui            | 1997        | 1.25<br>(1.15–1.36) |
| Piaui            | 1998        | 1.26<br>(1.16–1.36) |
| Piaui            | 1999        | 1.26<br>(1.17–1.35) |
| Piaui            | 2000        | 1.26<br>(1.18–1.34) |
| Piaui            | 2001        | 1.29<br>(1.22–1.36) |
| Piaui            | 2002        | 1.3<br>(1.23–1.36)  |
| Piaui            | 2003        | 1.29<br>(1.21–1.37) |
| Piaui            | 2004        | 1.29<br>(1.19–1.39) |
| Piaui            | 2005        | 1.29<br>(1.17–1.4)  |
| Piaui            | 2006        | 1.28<br>(1.16–1.4)  |
| Piaui            | 2007        | 1.28<br>(1.15–1.4)  |
| Piaui            | 2008        | 1.27<br>(1.15–1.39) |
| Piaui            | 2009        | 1.25<br>(1.13–1.37) |
| Piaui            | 2010        | 1.24<br>(1.12–1.37) |
| Piaui            | 2011        | 1.22<br>(1.1–1.35)  |
| Piaui            | 2012        | 1.21<br>(1.08–1.34) |
| Piaui            | 2013        | 1.19<br>(1.07–1.32) |
| Piaui            | 2014        | 1.18<br>(1.07–1.3)  |
| Piaui            | 2015        | 1.16<br>(1.06–1.28) |
| Piaui            | 2016        | 1.15<br>(1.04–1.26) |
| Piaui            | 2017        | 1.16<br>(1.05–1.28) |
| Rio de Janeiro   | 1950        | 1.24<br>(1.15–1.33) |
| Rio de Janeiro   | 1951        | 1.24<br>(1.14–1.34) |
| Rio de Janeiro   | 1952        | 1.25<br>(1.15–1.34) |
| Rio de Janeiro   | 1953        | 1.25<br>(1.14–1.36) |
| Rio de Janeiro   | 1954        | 1.25<br>(1.14–1.37) |
| Rio de Janeiro   | 1955        | 1.25<br>(1.13–1.36) |
| Rio de Janeiro   | 1956        | 1.23<br>(1.12–1.35) |
| Rio de Janeiro   | 1957        | 1.23<br>(1.13–1.34) |

**Table 15 Ratio of adjusted to unadjusted 5q0 values for scaled locations by year**

| <b>Geography</b> | <b>Year</b> | <b>Ratio</b>        |
|------------------|-------------|---------------------|
| Rio de Janeiro   | 1958        | 1.23<br>(1.15–1.33) |
| Rio de Janeiro   | 1959        | 1.24<br>(1.16–1.31) |
| Rio de Janeiro   | 1960        | 1.25<br>(1.19–1.3)  |
| Rio de Janeiro   | 1961        | 1.25<br>(1.2–1.3)   |
| Rio de Janeiro   | 1962        | 1.26<br>(1.18–1.33) |
| Rio de Janeiro   | 1963        | 1.27<br>(1.18–1.35) |
| Rio de Janeiro   | 1964        | 1.28<br>(1.17–1.38) |
| Rio de Janeiro   | 1965        | 1.29<br>(1.18–1.39) |
| Rio de Janeiro   | 1966        | 1.3<br>(1.19–1.4)   |
| Rio de Janeiro   | 1967        | 1.3<br>(1.2–1.4)    |
| Rio de Janeiro   | 1968        | 1.31<br>(1.21–1.4)  |
| Rio de Janeiro   | 1969        | 1.31<br>(1.22–1.4)  |
| Rio de Janeiro   | 1970        | 1.31<br>(1.23–1.4)  |
| Rio de Janeiro   | 1971        | 1.31<br>(1.22–1.41) |
| Rio de Janeiro   | 1972        | 1.31<br>(1.22–1.41) |
| Rio de Janeiro   | 1973        | 1.3<br>(1.2–1.41)   |
| Rio de Janeiro   | 1974        | 1.29<br>(1.19–1.4)  |
| Rio de Janeiro   | 1975        | 1.28<br>(1.18–1.39) |
| Rio de Janeiro   | 1976        | 1.27<br>(1.16–1.38) |
| Rio de Janeiro   | 1977        | 1.25<br>(1.16–1.36) |
| Rio de Janeiro   | 1978        | 1.24<br>(1.15–1.34) |
| Rio de Janeiro   | 1979        | 1.25<br>(1.15–1.34) |
| Rio de Janeiro   | 1980        | 1.28<br>(1.19–1.38) |
| Rio de Janeiro   | 1981        | 1.26<br>(1.17–1.35) |
| Rio de Janeiro   | 1982        | 1.26<br>(1.17–1.35) |
| Rio de Janeiro   | 1983        | 1.28<br>(1.19–1.37) |
| Rio de Janeiro   | 1984        | 1.27<br>(1.18–1.35) |
| Rio de Janeiro   | 1985        | 1.3<br>(1.23–1.38)  |
| Rio de Janeiro   | 1986        | 1.29<br>(1.22–1.35) |
| Rio de Janeiro   | 1987        | 1.28<br>(1.21–1.36) |
| Rio de Janeiro   | 1988        | 1.26<br>(1.19–1.34) |

**Table 15 Ratio of adjusted to unadjusted 5q0 values for scaled locations by year**

| <b>Geography</b>    | <b>Year</b> | <b>Ratio</b>        |
|---------------------|-------------|---------------------|
| Rio de Janeiro      | 1989        | 1.27<br>(1.19–1.35) |
| Rio de Janeiro      | 1990        | 1.27<br>(1.19–1.36) |
| Rio de Janeiro      | 1991        | 1.29<br>(1.2–1.39)  |
| Rio de Janeiro      | 1992        | 1.28<br>(1.18–1.38) |
| Rio de Janeiro      | 1993        | 1.25<br>(1.16–1.35) |
| Rio de Janeiro      | 1994        | 1.24<br>(1.15–1.34) |
| Rio de Janeiro      | 1995        | 1.24<br>(1.15–1.35) |
| Rio de Janeiro      | 1996        | 1.25<br>(1.15–1.37) |
| Rio de Janeiro      | 1997        | 1.26<br>(1.16–1.37) |
| Rio de Janeiro      | 1998        | 1.26<br>(1.16–1.36) |
| Rio de Janeiro      | 1999        | 1.27<br>(1.17–1.36) |
| Rio de Janeiro      | 2000        | 1.26<br>(1.18–1.34) |
| Rio de Janeiro      | 2001        | 1.3<br>(1.22–1.37)  |
| Rio de Janeiro      | 2002        | 1.31<br>(1.23–1.37) |
| Rio de Janeiro      | 2003        | 1.3<br>(1.21–1.37)  |
| Rio de Janeiro      | 2004        | 1.29<br>(1.19–1.39) |
| Rio de Janeiro      | 2005        | 1.29<br>(1.17–1.4)  |
| Rio de Janeiro      | 2006        | 1.28<br>(1.17–1.41) |
| Rio de Janeiro      | 2007        | 1.28<br>(1.16–1.4)  |
| Rio de Janeiro      | 2008        | 1.27<br>(1.15–1.39) |
| Rio de Janeiro      | 2009        | 1.25<br>(1.13–1.38) |
| Rio de Janeiro      | 2010        | 1.24<br>(1.12–1.37) |
| Rio de Janeiro      | 2011        | 1.23<br>(1.1–1.36)  |
| Rio de Janeiro      | 2012        | 1.21<br>(1.09–1.34) |
| Rio de Janeiro      | 2013        | 1.19<br>(1.07–1.32) |
| Rio de Janeiro      | 2014        | 1.18<br>(1.07–1.3)  |
| Rio de Janeiro      | 2015        | 1.16<br>(1.06–1.28) |
| Rio de Janeiro      | 2016        | 1.15<br>(1.04–1.26) |
| Rio de Janeiro      | 2017        | 1.16<br>(1.05–1.28) |
| Rio Grande do Norte | 1950        | 1.21<br>(1.13–1.28) |
| Rio Grande do Norte | 1951        | 1.21<br>(1.13–1.29) |



**Table 15 Ratio of adjusted to unadjusted 5q0 values for scaled locations by year**

| <b>Geography</b>    | <b>Year</b> | <b>Ratio</b>        |
|---------------------|-------------|---------------------|
| Rio Grande do Norte | 1952        | 1.22<br>(1.13–1.3)  |
| Rio Grande do Norte | 1953        | 1.22<br>(1.13–1.31) |
| Rio Grande do Norte | 1954        | 1.22<br>(1.12–1.32) |
| Rio Grande do Norte | 1955        | 1.22<br>(1.12–1.32) |
| Rio Grande do Norte | 1956        | 1.21<br>(1.11–1.31) |
| Rio Grande do Norte | 1957        | 1.21<br>(1.12–1.3)  |
| Rio Grande do Norte | 1958        | 1.21<br>(1.13–1.29) |
| Rio Grande do Norte | 1959        | 1.21<br>(1.15–1.28) |
| Rio Grande do Norte | 1960        | 1.22<br>(1.17–1.27) |
| Rio Grande do Norte | 1961        | 1.23<br>(1.18–1.27) |
| Rio Grande do Norte | 1962        | 1.24<br>(1.17–1.29) |
| Rio Grande do Norte | 1963        | 1.24<br>(1.16–1.32) |
| Rio Grande do Norte | 1964        | 1.25<br>(1.16–1.35) |
| Rio Grande do Norte | 1965        | 1.26<br>(1.17–1.35) |
| Rio Grande do Norte | 1966        | 1.27<br>(1.18–1.36) |
| Rio Grande do Norte | 1967        | 1.28<br>(1.19–1.36) |
| Rio Grande do Norte | 1968        | 1.28<br>(1.2–1.36)  |
| Rio Grande do Norte | 1969        | 1.29<br>(1.21–1.37) |
| Rio Grande do Norte | 1970        | 1.29<br>(1.21–1.37) |
| Rio Grande do Norte | 1971        | 1.29<br>(1.2–1.38)  |
| Rio Grande do Norte | 1972        | 1.29<br>(1.2–1.38)  |
| Rio Grande do Norte | 1973        | 1.28<br>(1.19–1.38) |
| Rio Grande do Norte | 1974        | 1.27<br>(1.18–1.38) |
| Rio Grande do Norte | 1975        | 1.27<br>(1.17–1.37) |
| Rio Grande do Norte | 1976        | 1.25<br>(1.15–1.36) |
| Rio Grande do Norte | 1977        | 1.24<br>(1.15–1.34) |
| Rio Grande do Norte | 1978        | 1.23<br>(1.14–1.32) |
| Rio Grande do Norte | 1979        | 1.24<br>(1.14–1.33) |
| Rio Grande do Norte | 1980        | 1.27<br>(1.18–1.37) |
| Rio Grande do Norte | 1981        | 1.25<br>(1.16–1.34) |
| Rio Grande do Norte | 1982        | 1.25<br>(1.17–1.34) |

**Table 15 Ratio of adjusted to unadjusted 5q0 values for scaled locations by year**

| <b>Geography</b>    | <b>Year</b> | <b>Ratio</b>        |
|---------------------|-------------|---------------------|
| Rio Grande do Norte | 1983        | 1.27<br>(1.19–1.36) |
| Rio Grande do Norte | 1984        | 1.26<br>(1.18–1.34) |
| Rio Grande do Norte | 1985        | 1.29<br>(1.22–1.37) |
| Rio Grande do Norte | 1986        | 1.28<br>(1.21–1.34) |
| Rio Grande do Norte | 1987        | 1.28<br>(1.2–1.34)  |
| Rio Grande do Norte | 1988        | 1.26<br>(1.18–1.33) |
| Rio Grande do Norte | 1989        | 1.26<br>(1.19–1.34) |
| Rio Grande do Norte | 1990        | 1.27<br>(1.18–1.36) |
| Rio Grande do Norte | 1991        | 1.29<br>(1.2–1.38)  |
| Rio Grande do Norte | 1992        | 1.27<br>(1.18–1.38) |
| Rio Grande do Norte | 1993        | 1.25<br>(1.16–1.35) |
| Rio Grande do Norte | 1994        | 1.23<br>(1.15–1.33) |
| Rio Grande do Norte | 1995        | 1.24<br>(1.14–1.35) |
| Rio Grande do Norte | 1996        | 1.25<br>(1.15–1.36) |
| Rio Grande do Norte | 1997        | 1.25<br>(1.15–1.36) |
| Rio Grande do Norte | 1998        | 1.26<br>(1.16–1.36) |
| Rio Grande do Norte | 1999        | 1.26<br>(1.17–1.35) |
| Rio Grande do Norte | 2000        | 1.26<br>(1.18–1.34) |
| Rio Grande do Norte | 2001        | 1.29<br>(1.22–1.36) |
| Rio Grande do Norte | 2002        | 1.3<br>(1.23–1.36)  |
| Rio Grande do Norte | 2003        | 1.3<br>(1.21–1.37)  |
| Rio Grande do Norte | 2004        | 1.29<br>(1.19–1.39) |
| Rio Grande do Norte | 2005        | 1.29<br>(1.17–1.4)  |
| Rio Grande do Norte | 2006        | 1.28<br>(1.16–1.41) |
| Rio Grande do Norte | 2007        | 1.28<br>(1.15–1.4)  |
| Rio Grande do Norte | 2008        | 1.27<br>(1.15–1.39) |
| Rio Grande do Norte | 2009        | 1.25<br>(1.13–1.37) |
| Rio Grande do Norte | 2010        | 1.24<br>(1.12–1.37) |
| Rio Grande do Norte | 2011        | 1.22<br>(1.1–1.36)  |
| Rio Grande do Norte | 2012        | 1.21<br>(1.09–1.34) |
| Rio Grande do Norte | 2013        | 1.19<br>(1.07–1.32) |

**Table 15 Ratio of adjusted to unadjusted 5q0 values for scaled locations by year**

| <b>Geography</b>    | <b>Year</b> | <b>Ratio</b>        |
|---------------------|-------------|---------------------|
| Rio Grande do Norte | 2014        | 1.18<br>(1.07–1.3)  |
| Rio Grande do Norte | 2015        | 1.16<br>(1.06–1.28) |
| Rio Grande do Norte | 2016        | 1.15<br>(1.04–1.26) |
| Rio Grande do Norte | 2017        | 1.16<br>(1.05–1.28) |
| Rio Grande do Sul   | 1950        | 1.25<br>(1.15–1.34) |
| Rio Grande do Sul   | 1951        | 1.25<br>(1.15–1.34) |
| Rio Grande do Sul   | 1952        | 1.25<br>(1.15–1.35) |
| Rio Grande do Sul   | 1953        | 1.25<br>(1.14–1.36) |
| Rio Grande do Sul   | 1954        | 1.25<br>(1.14–1.38) |
| Rio Grande do Sul   | 1955        | 1.25<br>(1.14–1.37) |
| Rio Grande do Sul   | 1956        | 1.24<br>(1.12–1.35) |
| Rio Grande do Sul   | 1957        | 1.24<br>(1.13–1.35) |
| Rio Grande do Sul   | 1958        | 1.24<br>(1.15–1.33) |
| Rio Grande do Sul   | 1959        | 1.24<br>(1.17–1.32) |
| Rio Grande do Sul   | 1960        | 1.25<br>(1.19–1.3)  |
| Rio Grande do Sul   | 1961        | 1.26<br>(1.2–1.31)  |
| Rio Grande do Sul   | 1962        | 1.26<br>(1.19–1.33) |
| Rio Grande do Sul   | 1963        | 1.27<br>(1.18–1.36) |
| Rio Grande do Sul   | 1964        | 1.28<br>(1.18–1.39) |
| Rio Grande do Sul   | 1965        | 1.29<br>(1.18–1.39) |
| Rio Grande do Sul   | 1966        | 1.3<br>(1.2–1.4)    |
| Rio Grande do Sul   | 1967        | 1.3<br>(1.2–1.4)    |
| Rio Grande do Sul   | 1968        | 1.31<br>(1.22–1.4)  |
| Rio Grande do Sul   | 1969        | 1.31<br>(1.23–1.41) |
| Rio Grande do Sul   | 1970        | 1.32<br>(1.23–1.41) |
| Rio Grande do Sul   | 1971        | 1.32<br>(1.22–1.42) |
| Rio Grande do Sul   | 1972        | 1.31<br>(1.22–1.41) |
| Rio Grande do Sul   | 1973        | 1.31<br>(1.21–1.42) |
| Rio Grande do Sul   | 1974        | 1.3<br>(1.2–1.41)   |
| Rio Grande do Sul   | 1975        | 1.29<br>(1.18–1.4)  |
| Rio Grande do Sul   | 1976        | 1.27<br>(1.16–1.39) |

**Table 15 Ratio of adjusted to unadjusted 5q0 values for scaled locations by year**

| <b>Geography</b>  | <b>Year</b> | <b>Ratio</b>        |
|-------------------|-------------|---------------------|
| Rio Grande do Sul | 1977        | 1.26<br>(1.16–1.37) |
| Rio Grande do Sul | 1978        | 1.24<br>(1.15–1.35) |
| Rio Grande do Sul | 1979        | 1.25<br>(1.15–1.35) |
| Rio Grande do Sul | 1980        | 1.29<br>(1.19–1.39) |
| Rio Grande do Sul | 1981        | 1.26<br>(1.17–1.36) |
| Rio Grande do Sul | 1982        | 1.26<br>(1.18–1.36) |
| Rio Grande do Sul | 1983        | 1.28<br>(1.2–1.37)  |
| Rio Grande do Sul | 1984        | 1.27<br>(1.19–1.35) |
| Rio Grande do Sul | 1985        | 1.3<br>(1.23–1.38)  |
| Rio Grande do Sul | 1986        | 1.29<br>(1.22–1.36) |
| Rio Grande do Sul | 1987        | 1.29<br>(1.21–1.36) |
| Rio Grande do Sul | 1988        | 1.27<br>(1.19–1.34) |
| Rio Grande do Sul | 1989        | 1.27<br>(1.19–1.36) |
| Rio Grande do Sul | 1990        | 1.28<br>(1.19–1.37) |
| Rio Grande do Sul | 1991        | 1.3<br>(1.2–1.4)    |
| Rio Grande do Sul | 1992        | 1.28<br>(1.18–1.39) |
| Rio Grande do Sul | 1993        | 1.26<br>(1.16–1.36) |
| Rio Grande do Sul | 1994        | 1.24<br>(1.15–1.34) |
| Rio Grande do Sul | 1995        | 1.24<br>(1.15–1.35) |
| Rio Grande do Sul | 1996        | 1.25<br>(1.15–1.37) |
| Rio Grande do Sul | 1997        | 1.26<br>(1.16–1.37) |
| Rio Grande do Sul | 1998        | 1.26<br>(1.16–1.36) |
| Rio Grande do Sul | 1999        | 1.27<br>(1.18–1.36) |
| Rio Grande do Sul | 2000        | 1.26<br>(1.18–1.34) |
| Rio Grande do Sul | 2001        | 1.3<br>(1.22–1.37)  |
| Rio Grande do Sul | 2002        | 1.31<br>(1.23–1.37) |
| Rio Grande do Sul | 2003        | 1.3<br>(1.21–1.37)  |
| Rio Grande do Sul | 2004        | 1.29<br>(1.19–1.39) |
| Rio Grande do Sul | 2005        | 1.29<br>(1.17–1.4)  |
| Rio Grande do Sul | 2006        | 1.28<br>(1.17–1.41) |
| Rio Grande do Sul | 2007        | 1.28<br>(1.16–1.4)  |

**Table 15 Ratio of adjusted to unadjusted 5q0 values for scaled locations by year**

| <b>Geography</b>  | <b>Year</b> | <b>Ratio</b>        |
|-------------------|-------------|---------------------|
| Rio Grande do Sul | 2008        | 1.27<br>(1.15–1.39) |
| Rio Grande do Sul | 2009        | 1.25<br>(1.13–1.38) |
| Rio Grande do Sul | 2010        | 1.24<br>(1.12–1.37) |
| Rio Grande do Sul | 2011        | 1.23<br>(1.1–1.36)  |
| Rio Grande do Sul | 2012        | 1.21<br>(1.09–1.34) |
| Rio Grande do Sul | 2013        | 1.19<br>(1.07–1.32) |
| Rio Grande do Sul | 2014        | 1.18<br>(1.07–1.3)  |
| Rio Grande do Sul | 2015        | 1.16<br>(1.06–1.28) |
| Rio Grande do Sul | 2016        | 1.15<br>(1.04–1.26) |
| Rio Grande do Sul | 2017        | 1.16<br>(1.05–1.28) |
| Rondônia          | 1950        | 1.23<br>(1.13–1.31) |
| Rondônia          | 1951        | 1.23<br>(1.13–1.32) |
| Rondônia          | 1952        | 1.23<br>(1.14–1.32) |
| Rondônia          | 1953        | 1.23<br>(1.13–1.33) |
| Rondônia          | 1954        | 1.23<br>(1.13–1.34) |
| Rondônia          | 1955        | 1.23<br>(1.12–1.33) |
| Rondônia          | 1956        | 1.22<br>(1.11–1.32) |
| Rondônia          | 1957        | 1.22<br>(1.12–1.32) |
| Rondônia          | 1958        | 1.22<br>(1.14–1.3)  |
| Rondônia          | 1959        | 1.22<br>(1.16–1.29) |
| Rondônia          | 1960        | 1.23<br>(1.18–1.28) |
| Rondônia          | 1961        | 1.24<br>(1.19–1.29) |
| Rondônia          | 1962        | 1.24<br>(1.17–1.31) |
| Rondônia          | 1963        | 1.25<br>(1.17–1.33) |
| Rondônia          | 1964        | 1.26<br>(1.16–1.36) |
| Rondônia          | 1965        | 1.27<br>(1.17–1.37) |
| Rondônia          | 1966        | 1.28<br>(1.19–1.37) |
| Rondônia          | 1967        | 1.28<br>(1.19–1.37) |
| Rondônia          | 1968        | 1.29<br>(1.21–1.37) |
| Rondônia          | 1969        | 1.3<br>(1.21–1.38)  |
| Rondônia          | 1970        | 1.3<br>(1.22–1.39)  |

**Table 15 Ratio of adjusted to unadjusted 5q0 values for scaled locations by year**

| <b>Geography</b> | <b>Year</b> | <b>Ratio</b>        |
|------------------|-------------|---------------------|
| Rondônia         | 1971        | 1.3<br>(1.21–1.39)  |
| Rondônia         | 1972        | 1.3<br>(1.21–1.39)  |
| Rondônia         | 1973        | 1.29<br>(1.2–1.4)   |
| Rondônia         | 1974        | 1.28<br>(1.19–1.39) |
| Rondônia         | 1975        | 1.27<br>(1.17–1.38) |
| Rondônia         | 1976        | 1.26<br>(1.16–1.37) |
| Rondônia         | 1977        | 1.25<br>(1.15–1.35) |
| Rondônia         | 1978        | 1.24<br>(1.14–1.33) |
| Rondônia         | 1979        | 1.24<br>(1.15–1.34) |
| Rondônia         | 1980        | 1.28<br>(1.18–1.38) |
| Rondônia         | 1981        | 1.26<br>(1.17–1.35) |
| Rondônia         | 1982        | 1.26<br>(1.17–1.35) |
| Rondônia         | 1983        | 1.28<br>(1.19–1.37) |
| Rondônia         | 1984        | 1.27<br>(1.18–1.35) |
| Rondônia         | 1985        | 1.3<br>(1.22–1.37)  |
| Rondônia         | 1986        | 1.28<br>(1.21–1.35) |
| Rondônia         | 1987        | 1.28<br>(1.21–1.35) |
| Rondônia         | 1988        | 1.26<br>(1.19–1.33) |
| Rondônia         | 1989        | 1.27<br>(1.19–1.35) |
| Rondônia         | 1990        | 1.27<br>(1.18–1.36) |
| Rondônia         | 1991        | 1.29<br>(1.2–1.39)  |
| Rondônia         | 1992        | 1.28<br>(1.18–1.38) |
| Rondônia         | 1993        | 1.26<br>(1.16–1.36) |
| Rondônia         | 1994        | 1.24<br>(1.15–1.34) |
| Rondônia         | 1995        | 1.24<br>(1.15–1.35) |
| Rondônia         | 1996        | 1.25<br>(1.15–1.37) |
| Rondônia         | 1997        | 1.26<br>(1.16–1.37) |
| Rondônia         | 1998        | 1.26<br>(1.16–1.36) |
| Rondônia         | 1999        | 1.27<br>(1.17–1.36) |
| Rondônia         | 2000        | 1.26<br>(1.18–1.34) |
| Rondônia         | 2001        | 1.29<br>(1.22–1.37) |

**Table 15 Ratio of adjusted to unadjusted 5q0 values for scaled locations by year**

| <b>Geography</b> | <b>Year</b> | <b>Ratio</b>        |
|------------------|-------------|---------------------|
| Rondônia         | 2002        | 1.3<br>(1.23–1.37)  |
| Rondônia         | 2003        | 1.3<br>(1.21–1.37)  |
| Rondônia         | 2004        | 1.29<br>(1.19–1.39) |
| Rondônia         | 2005        | 1.29<br>(1.17–1.4)  |
| Rondônia         | 2006        | 1.28<br>(1.17–1.41) |
| Rondônia         | 2007        | 1.28<br>(1.15–1.4)  |
| Rondônia         | 2008        | 1.27<br>(1.15–1.39) |
| Rondônia         | 2009        | 1.25<br>(1.13–1.37) |
| Rondônia         | 2010        | 1.24<br>(1.12–1.37) |
| Rondônia         | 2011        | 1.23<br>(1.1–1.36)  |
| Rondônia         | 2012        | 1.21<br>(1.09–1.34) |
| Rondônia         | 2013        | 1.19<br>(1.07–1.32) |
| Rondônia         | 2014        | 1.18<br>(1.07–1.3)  |
| Rondônia         | 2015        | 1.16<br>(1.06–1.28) |
| Rondônia         | 2016        | 1.15<br>(1.04–1.26) |
| Rondônia         | 2017        | 1.16<br>(1.05–1.28) |
| Roraima          | 1950        | 1.22<br>(1.13–1.3)  |
| Roraima          | 1951        | 1.22<br>(1.13–1.31) |
| Roraima          | 1952        | 1.22<br>(1.13–1.31) |
| Roraima          | 1953        | 1.23<br>(1.13–1.33) |
| Roraima          | 1954        | 1.23<br>(1.13–1.33) |
| Roraima          | 1955        | 1.22<br>(1.12–1.33) |
| Roraima          | 1956        | 1.21<br>(1.11–1.31) |
| Roraima          | 1957        | 1.21<br>(1.12–1.31) |
| Roraima          | 1958        | 1.22<br>(1.13–1.3)  |
| Roraima          | 1959        | 1.22<br>(1.15–1.29) |
| Roraima          | 1960        | 1.23<br>(1.17–1.28) |
| Roraima          | 1961        | 1.24<br>(1.18–1.28) |
| Roraima          | 1962        | 1.24<br>(1.17–1.3)  |
| Roraima          | 1963        | 1.25<br>(1.16–1.33) |
| Roraima          | 1964        | 1.26<br>(1.16–1.36) |

**Table 15 Ratio of adjusted to unadjusted 5q0 values for scaled locations by year**

| <b>Geography</b> | <b>Year</b> | <b>Ratio</b>        |
|------------------|-------------|---------------------|
| Roraima          | 1965        | 1.27<br>(1.17–1.36) |
| Roraima          | 1966        | 1.28<br>(1.19–1.37) |
| Roraima          | 1967        | 1.28<br>(1.19–1.37) |
| Roraima          | 1968        | 1.29<br>(1.21–1.38) |
| Roraima          | 1969        | 1.29<br>(1.21–1.38) |
| Roraima          | 1970        | 1.3<br>(1.22–1.38)  |
| Roraima          | 1971        | 1.3<br>(1.21–1.39)  |
| Roraima          | 1972        | 1.3<br>(1.21–1.39)  |
| Roraima          | 1973        | 1.29<br>(1.2–1.4)   |
| Roraima          | 1974        | 1.28<br>(1.19–1.39) |
| Roraima          | 1975        | 1.27<br>(1.17–1.39) |
| Roraima          | 1976        | 1.26<br>(1.16–1.37) |
| Roraima          | 1977        | 1.25<br>(1.15–1.35) |
| Roraima          | 1978        | 1.24<br>(1.14–1.34) |
| Roraima          | 1979        | 1.24<br>(1.15–1.34) |
| Roraima          | 1980        | 1.28<br>(1.18–1.38) |
| Roraima          | 1981        | 1.26<br>(1.16–1.35) |
| Roraima          | 1982        | 1.26<br>(1.17–1.35) |
| Roraima          | 1983        | 1.28<br>(1.19–1.36) |
| Roraima          | 1984        | 1.27<br>(1.18–1.35) |
| Roraima          | 1985        | 1.29<br>(1.22–1.37) |
| Roraima          | 1986        | 1.28<br>(1.21–1.35) |
| Roraima          | 1987        | 1.28<br>(1.21–1.35) |
| Roraima          | 1988        | 1.26<br>(1.19–1.34) |
| Roraima          | 1989        | 1.27<br>(1.19–1.35) |
| Roraima          | 1990        | 1.27<br>(1.19–1.36) |
| Roraima          | 1991        | 1.29<br>(1.2–1.39)  |
| Roraima          | 1992        | 1.28<br>(1.18–1.38) |
| Roraima          | 1993        | 1.25<br>(1.16–1.35) |
| Roraima          | 1994        | 1.24<br>(1.15–1.34) |
| Roraima          | 1995        | 1.24<br>(1.15–1.35) |



**Table 15 Ratio of adjusted to unadjusted 5q0 values for scaled locations by year**

| <b>Geography</b> | <b>Year</b> | <b>Ratio</b>        |
|------------------|-------------|---------------------|
| Roraima          | 1996        | 1.25<br>(1.15–1.36) |
| Roraima          | 1997        | 1.26<br>(1.16–1.36) |
| Roraima          | 1998        | 1.26<br>(1.16–1.36) |
| Roraima          | 1999        | 1.27<br>(1.17–1.36) |
| Roraima          | 2000        | 1.26<br>(1.18–1.34) |
| Roraima          | 2001        | 1.3<br>(1.22–1.37)  |
| Roraima          | 2002        | 1.3<br>(1.23–1.37)  |
| Roraima          | 2003        | 1.3<br>(1.21–1.37)  |
| Roraima          | 2004        | 1.29<br>(1.19–1.39) |
| Roraima          | 2005        | 1.29<br>(1.17–1.4)  |
| Roraima          | 2006        | 1.28<br>(1.16–1.41) |
| Roraima          | 2007        | 1.28<br>(1.15–1.4)  |
| Roraima          | 2008        | 1.27<br>(1.15–1.39) |
| Roraima          | 2009        | 1.25<br>(1.13–1.37) |
| Roraima          | 2010        | 1.24<br>(1.12–1.37) |
| Roraima          | 2011        | 1.22<br>(1.1–1.36)  |
| Roraima          | 2012        | 1.21<br>(1.08–1.34) |
| Roraima          | 2013        | 1.19<br>(1.07–1.32) |
| Roraima          | 2014        | 1.18<br>(1.07–1.3)  |
| Roraima          | 2015        | 1.16<br>(1.06–1.28) |
| Roraima          | 2016        | 1.15<br>(1.04–1.26) |
| Roraima          | 2017        | 1.16<br>(1.05–1.28) |
| Santa Catarina   | 1950        | 1.25<br>(1.15–1.34) |
| Santa Catarina   | 1951        | 1.25<br>(1.15–1.35) |
| Santa Catarina   | 1952        | 1.25<br>(1.15–1.35) |
| Santa Catarina   | 1953        | 1.25<br>(1.14–1.37) |
| Santa Catarina   | 1954        | 1.25<br>(1.14–1.38) |
| Santa Catarina   | 1955        | 1.25<br>(1.14–1.37) |
| Santa Catarina   | 1956        | 1.24<br>(1.12–1.35) |
| Santa Catarina   | 1957        | 1.24<br>(1.13–1.35) |
| Santa Catarina   | 1958        | 1.24<br>(1.15–1.33) |

**Table 15 Ratio of adjusted to unadjusted 5q0 values for scaled locations by year**

| <b>Geography</b> | <b>Year</b> | <b>Ratio</b>        |
|------------------|-------------|---------------------|
| Santa Catarina   | 1959        | 1.24<br>(1.17–1.32) |
| Santa Catarina   | 1960        | 1.25<br>(1.19–1.3)  |
| Santa Catarina   | 1961        | 1.26<br>(1.21–1.3)  |
| Santa Catarina   | 1962        | 1.26<br>(1.19–1.33) |
| Santa Catarina   | 1963        | 1.27<br>(1.18–1.36) |
| Santa Catarina   | 1964        | 1.28<br>(1.18–1.39) |
| Santa Catarina   | 1965        | 1.29<br>(1.18–1.39) |
| Santa Catarina   | 1966        | 1.3<br>(1.2–1.4)    |
| Santa Catarina   | 1967        | 1.3<br>(1.2–1.4)    |
| Santa Catarina   | 1968        | 1.31<br>(1.22–1.4)  |
| Santa Catarina   | 1969        | 1.31<br>(1.23–1.41) |
| Santa Catarina   | 1970        | 1.32<br>(1.23–1.41) |
| Santa Catarina   | 1971        | 1.31<br>(1.22–1.42) |
| Santa Catarina   | 1972        | 1.31<br>(1.22–1.41) |
| Santa Catarina   | 1973        | 1.31<br>(1.21–1.41) |
| Santa Catarina   | 1974        | 1.3<br>(1.19–1.41)  |
| Santa Catarina   | 1975        | 1.28<br>(1.18–1.4)  |
| Santa Catarina   | 1976        | 1.27<br>(1.16–1.38) |
| Santa Catarina   | 1977        | 1.26<br>(1.16–1.36) |
| Santa Catarina   | 1978        | 1.24<br>(1.15–1.34) |
| Santa Catarina   | 1979        | 1.25<br>(1.15–1.35) |
| Santa Catarina   | 1980        | 1.29<br>(1.19–1.39) |
| Santa Catarina   | 1981        | 1.26<br>(1.17–1.35) |
| Santa Catarina   | 1982        | 1.26<br>(1.18–1.36) |
| Santa Catarina   | 1983        | 1.28<br>(1.19–1.37) |
| Santa Catarina   | 1984        | 1.27<br>(1.19–1.35) |
| Santa Catarina   | 1985        | 1.3<br>(1.23–1.38)  |
| Santa Catarina   | 1986        | 1.29<br>(1.22–1.36) |
| Santa Catarina   | 1987        | 1.28<br>(1.21–1.36) |
| Santa Catarina   | 1988        | 1.26<br>(1.19–1.34) |
| Santa Catarina   | 1989        | 1.27<br>(1.19–1.35) |

**Table 15 Ratio of adjusted to unadjusted 5q0 values for scaled locations by year**

| <b>Geography</b> | <b>Year</b> | <b>Ratio</b>        |
|------------------|-------------|---------------------|
| Santa Catarina   | 1990        | 1.28<br>(1.19–1.36) |
| Santa Catarina   | 1991        | 1.29<br>(1.2–1.39)  |
| Santa Catarina   | 1992        | 1.28<br>(1.18–1.38) |
| Santa Catarina   | 1993        | 1.26<br>(1.16–1.35) |
| Santa Catarina   | 1994        | 1.24<br>(1.15–1.34) |
| Santa Catarina   | 1995        | 1.24<br>(1.15–1.35) |
| Santa Catarina   | 1996        | 1.25<br>(1.15–1.37) |
| Santa Catarina   | 1997        | 1.26<br>(1.16–1.37) |
| Santa Catarina   | 1998        | 1.26<br>(1.16–1.36) |
| Santa Catarina   | 1999        | 1.27<br>(1.17–1.36) |
| Santa Catarina   | 2000        | 1.26<br>(1.18–1.34) |
| Santa Catarina   | 2001        | 1.3<br>(1.22–1.37)  |
| Santa Catarina   | 2002        | 1.3<br>(1.23–1.37)  |
| Santa Catarina   | 2003        | 1.3<br>(1.21–1.37)  |
| Santa Catarina   | 2004        | 1.29<br>(1.19–1.39) |
| Santa Catarina   | 2005        | 1.29<br>(1.17–1.4)  |
| Santa Catarina   | 2006        | 1.28<br>(1.16–1.41) |
| Santa Catarina   | 2007        | 1.28<br>(1.15–1.4)  |
| Santa Catarina   | 2008        | 1.27<br>(1.15–1.39) |
| Santa Catarina   | 2009        | 1.25<br>(1.13–1.37) |
| Santa Catarina   | 2010        | 1.24<br>(1.12–1.37) |
| Santa Catarina   | 2011        | 1.23<br>(1.1–1.36)  |
| Santa Catarina   | 2012        | 1.21<br>(1.09–1.34) |
| Santa Catarina   | 2013        | 1.19<br>(1.07–1.32) |
| Santa Catarina   | 2014        | 1.18<br>(1.07–1.3)  |
| Santa Catarina   | 2015        | 1.16<br>(1.06–1.28) |
| Santa Catarina   | 2016        | 1.15<br>(1.04–1.26) |
| Santa Catarina   | 2017        | 1.16<br>(1.05–1.28) |
| São Paulo        | 1950        | 1.25<br>(1.15–1.33) |
| São Paulo        | 1951        | 1.25<br>(1.14–1.34) |
| São Paulo        | 1952        | 1.25<br>(1.15–1.35) |

**Table 15 Ratio of adjusted to unadjusted 5q0 values for scaled locations by year**

| <b>Geography</b> | <b>Year</b> | <b>Ratio</b>        |
|------------------|-------------|---------------------|
| São Paulo        | 1953        | 1.25<br>(1.14–1.36) |
| São Paulo        | 1954        | 1.25<br>(1.14–1.37) |
| São Paulo        | 1955        | 1.25<br>(1.13–1.37) |
| São Paulo        | 1956        | 1.24<br>(1.12–1.35) |
| São Paulo        | 1957        | 1.23<br>(1.13–1.35) |
| São Paulo        | 1958        | 1.24<br>(1.15–1.33) |
| São Paulo        | 1959        | 1.24<br>(1.16–1.32) |
| São Paulo        | 1960        | 1.25<br>(1.19–1.3)  |
| São Paulo        | 1961        | 1.26<br>(1.2–1.3)   |
| São Paulo        | 1962        | 1.26<br>(1.19–1.33) |
| São Paulo        | 1963        | 1.27<br>(1.18–1.36) |
| São Paulo        | 1964        | 1.28<br>(1.18–1.39) |
| São Paulo        | 1965        | 1.29<br>(1.18–1.39) |
| São Paulo        | 1966        | 1.3<br>(1.2–1.4)    |
| São Paulo        | 1967        | 1.3<br>(1.2–1.4)    |
| São Paulo        | 1968        | 1.31<br>(1.22–1.4)  |
| São Paulo        | 1969        | 1.31<br>(1.22–1.4)  |
| São Paulo        | 1970        | 1.31<br>(1.23–1.41) |
| São Paulo        | 1971        | 1.31<br>(1.22–1.41) |
| São Paulo        | 1972        | 1.31<br>(1.22–1.41) |
| São Paulo        | 1973        | 1.3<br>(1.2–1.41)   |
| São Paulo        | 1974        | 1.29<br>(1.19–1.4)  |
| São Paulo        | 1975        | 1.28<br>(1.18–1.39) |
| São Paulo        | 1976        | 1.27<br>(1.16–1.38) |
| São Paulo        | 1977        | 1.25<br>(1.16–1.36) |
| São Paulo        | 1978        | 1.24<br>(1.15–1.34) |
| São Paulo        | 1979        | 1.25<br>(1.15–1.34) |
| São Paulo        | 1980        | 1.29<br>(1.19–1.38) |
| São Paulo        | 1981        | 1.26<br>(1.17–1.35) |
| São Paulo        | 1982        | 1.26<br>(1.17–1.35) |
| São Paulo        | 1983        | 1.28<br>(1.19–1.37) |

**Table 15 Ratio of adjusted to unadjusted 5q0 values for scaled locations by year**

| <b>Geography</b> | <b>Year</b> | <b>Ratio</b>        |
|------------------|-------------|---------------------|
| São Paulo        | 1984        | 1.27<br>(1.19–1.35) |
| São Paulo        | 1985        | 1.3<br>(1.23–1.38)  |
| São Paulo        | 1986        | 1.29<br>(1.22–1.36) |
| São Paulo        | 1987        | 1.28<br>(1.21–1.36) |
| São Paulo        | 1988        | 1.26<br>(1.19–1.34) |
| São Paulo        | 1989        | 1.27<br>(1.19–1.35) |
| São Paulo        | 1990        | 1.27<br>(1.19–1.36) |
| São Paulo        | 1991        | 1.29<br>(1.2–1.39)  |
| São Paulo        | 1992        | 1.28<br>(1.18–1.39) |
| São Paulo        | 1993        | 1.26<br>(1.16–1.36) |
| São Paulo        | 1994        | 1.24<br>(1.15–1.34) |
| São Paulo        | 1995        | 1.24<br>(1.15–1.35) |
| São Paulo        | 1996        | 1.25<br>(1.15–1.37) |
| São Paulo        | 1997        | 1.26<br>(1.16–1.37) |
| São Paulo        | 1998        | 1.26<br>(1.16–1.36) |
| São Paulo        | 1999        | 1.27<br>(1.17–1.36) |
| São Paulo        | 2000        | 1.26<br>(1.18–1.34) |
| São Paulo        | 2001        | 1.3<br>(1.22–1.37)  |
| São Paulo        | 2002        | 1.31<br>(1.23–1.37) |
| São Paulo        | 2003        | 1.3<br>(1.21–1.37)  |
| São Paulo        | 2004        | 1.29<br>(1.19–1.39) |
| São Paulo        | 2005        | 1.29<br>(1.17–1.4)  |
| São Paulo        | 2006        | 1.28<br>(1.17–1.41) |
| São Paulo        | 2007        | 1.28<br>(1.16–1.4)  |
| São Paulo        | 2008        | 1.27<br>(1.15–1.39) |
| São Paulo        | 2009        | 1.25<br>(1.13–1.38) |
| São Paulo        | 2010        | 1.24<br>(1.12–1.37) |
| São Paulo        | 2011        | 1.23<br>(1.1–1.36)  |
| São Paulo        | 2012        | 1.21<br>(1.09–1.34) |
| São Paulo        | 2013        | 1.19<br>(1.07–1.32) |
| São Paulo        | 2014        | 1.18<br>(1.07–1.3)  |

**Table 15 Ratio of adjusted to unadjusted 5q0 values for scaled locations by year**

| <b>Geography</b> | <b>Year</b> | <b>Ratio</b>        |
|------------------|-------------|---------------------|
| São Paulo        | 2015        | 1.16<br>(1.06–1.28) |
| São Paulo        | 2016        | 1.15<br>(1.04–1.26) |
| São Paulo        | 2017        | 1.16<br>(1.05–1.28) |
| Sergipe          | 1950        | 1.23<br>(1.14–1.3)  |
| Sergipe          | 1951        | 1.23<br>(1.14–1.31) |
| Sergipe          | 1952        | 1.23<br>(1.14–1.32) |
| Sergipe          | 1953        | 1.23<br>(1.14–1.33) |
| Sergipe          | 1954        | 1.23<br>(1.13–1.34) |
| Sergipe          | 1955        | 1.23<br>(1.13–1.33) |
| Sergipe          | 1956        | 1.22<br>(1.12–1.32) |
| Sergipe          | 1957        | 1.22<br>(1.12–1.32) |
| Sergipe          | 1958        | 1.22<br>(1.14–1.31) |
| Sergipe          | 1959        | 1.23<br>(1.16–1.29) |
| Sergipe          | 1960        | 1.23<br>(1.18–1.28) |
| Sergipe          | 1961        | 1.24<br>(1.19–1.28) |
| Sergipe          | 1962        | 1.25<br>(1.18–1.31) |
| Sergipe          | 1963        | 1.26<br>(1.17–1.34) |
| Sergipe          | 1964        | 1.26<br>(1.17–1.37) |
| Sergipe          | 1965        | 1.27<br>(1.17–1.37) |
| Sergipe          | 1966        | 1.28<br>(1.19–1.38) |
| Sergipe          | 1967        | 1.29<br>(1.19–1.38) |
| Sergipe          | 1968        | 1.29<br>(1.21–1.38) |
| Sergipe          | 1969        | 1.3<br>(1.21–1.39)  |
| Sergipe          | 1970        | 1.3<br>(1.22–1.39)  |
| Sergipe          | 1971        | 1.3<br>(1.21–1.39)  |
| Sergipe          | 1972        | 1.3<br>(1.21–1.39)  |
| Sergipe          | 1973        | 1.29<br>(1.2–1.39)  |
| Sergipe          | 1974        | 1.28<br>(1.19–1.39) |
| Sergipe          | 1975        | 1.27<br>(1.17–1.38) |
| Sergipe          | 1976        | 1.26<br>(1.16–1.36) |
| Sergipe          | 1977        | 1.25<br>(1.15–1.35) |

**Table 15 Ratio of adjusted to unadjusted 5q0 values for scaled locations by year**

| <b>Geography</b> | <b>Year</b> | <b>Ratio</b>        |
|------------------|-------------|---------------------|
| Sergipe          | 1978        | 1.23<br>(1.14–1.33) |
| Sergipe          | 1979        | 1.24<br>(1.15–1.33) |
| Sergipe          | 1980        | 1.27<br>(1.18–1.37) |
| Sergipe          | 1981        | 1.25<br>(1.16–1.34) |
| Sergipe          | 1982        | 1.25<br>(1.17–1.34) |
| Sergipe          | 1983        | 1.27<br>(1.19–1.36) |
| Sergipe          | 1984        | 1.26<br>(1.18–1.34) |
| Sergipe          | 1985        | 1.29<br>(1.22–1.37) |
| Sergipe          | 1986        | 1.28<br>(1.21–1.34) |
| Sergipe          | 1987        | 1.28<br>(1.2–1.35)  |
| Sergipe          | 1988        | 1.26<br>(1.18–1.33) |
| Sergipe          | 1989        | 1.26<br>(1.19–1.34) |
| Sergipe          | 1990        | 1.27<br>(1.18–1.36) |
| Sergipe          | 1991        | 1.29<br>(1.2–1.38)  |
| Sergipe          | 1992        | 1.27<br>(1.18–1.38) |
| Sergipe          | 1993        | 1.25<br>(1.16–1.35) |
| Sergipe          | 1994        | 1.23<br>(1.15–1.33) |
| Sergipe          | 1995        | 1.24<br>(1.14–1.35) |
| Sergipe          | 1996        | 1.25<br>(1.15–1.36) |
| Sergipe          | 1997        | 1.25<br>(1.15–1.36) |
| Sergipe          | 1998        | 1.26<br>(1.16–1.36) |
| Sergipe          | 1999        | 1.26<br>(1.17–1.35) |
| Sergipe          | 2000        | 1.26<br>(1.18–1.34) |
| Sergipe          | 2001        | 1.29<br>(1.22–1.36) |
| Sergipe          | 2002        | 1.3<br>(1.23–1.36)  |
| Sergipe          | 2003        | 1.29<br>(1.21–1.37) |
| Sergipe          | 2004        | 1.29<br>(1.19–1.39) |
| Sergipe          | 2005        | 1.29<br>(1.17–1.4)  |
| Sergipe          | 2006        | 1.28<br>(1.16–1.4)  |
| Sergipe          | 2007        | 1.28<br>(1.15–1.4)  |
| Sergipe          | 2008        | 1.27<br>(1.15–1.39) |

**Table 15 Ratio of adjusted to unadjusted 5q0 values for scaled locations by year**

| <b>Geography</b> | <b>Year</b> | <b>Ratio</b>        |
|------------------|-------------|---------------------|
| Sergipe          | 2009        | 1.25<br>(1.13–1.37) |
| Sergipe          | 2010        | 1.24<br>(1.12–1.37) |
| Sergipe          | 2011        | 1.22<br>(1.1–1.35)  |
| Sergipe          | 2012        | 1.21<br>(1.08–1.34) |
| Sergipe          | 2013        | 1.19<br>(1.07–1.32) |
| Sergipe          | 2014        | 1.18<br>(1.07–1.3)  |
| Sergipe          | 2015        | 1.16<br>(1.06–1.28) |
| Sergipe          | 2016        | 1.15<br>(1.04–1.26) |
| Sergipe          | 2017        | 1.16<br>(1.05–1.28) |
| Tocantins        | 1950        | 1.22<br>(1.13–1.31) |
| Tocantins        | 1951        | 1.22<br>(1.13–1.31) |
| Tocantins        | 1952        | 1.23<br>(1.13–1.32) |
| Tocantins        | 1953        | 1.23<br>(1.13–1.33) |
| Tocantins        | 1954        | 1.23<br>(1.13–1.34) |
| Tocantins        | 1955        | 1.23<br>(1.12–1.33) |
| Tocantins        | 1956        | 1.22<br>(1.11–1.32) |
| Tocantins        | 1957        | 1.22<br>(1.12–1.32) |
| Tocantins        | 1958        | 1.22<br>(1.13–1.31) |
| Tocantins        | 1959        | 1.22<br>(1.15–1.29) |
| Tocantins        | 1960        | 1.23<br>(1.17–1.28) |
| Tocantins        | 1961        | 1.24<br>(1.19–1.28) |
| Tocantins        | 1962        | 1.24<br>(1.17–1.31) |
| Tocantins        | 1963        | 1.25<br>(1.16–1.33) |
| Tocantins        | 1964        | 1.26<br>(1.16–1.36) |
| Tocantins        | 1965        | 1.27<br>(1.17–1.36) |
| Tocantins        | 1966        | 1.28<br>(1.18–1.37) |
| Tocantins        | 1967        | 1.28<br>(1.19–1.38) |
| Tocantins        | 1968        | 1.29<br>(1.2–1.37)  |
| Tocantins        | 1969        | 1.29<br>(1.21–1.38) |
| Tocantins        | 1970        | 1.3<br>(1.21–1.38)  |
| Tocantins        | 1971        | 1.3<br>(1.21–1.39)  |



**Table 15 Ratio of adjusted to unadjusted 5q0 values for scaled locations by year**

| <b>Geography</b> | <b>Year</b> | <b>Ratio</b>        |
|------------------|-------------|---------------------|
| Tocantins        | 1972        | 1.29<br>(1.21–1.39) |
| Tocantins        | 1973        | 1.29<br>(1.2–1.39)  |
| Tocantins        | 1974        | 1.28<br>(1.19–1.39) |
| Tocantins        | 1975        | 1.27<br>(1.17–1.38) |
| Tocantins        | 1976        | 1.26<br>(1.16–1.37) |
| Tocantins        | 1977        | 1.25<br>(1.15–1.35) |
| Tocantins        | 1978        | 1.23<br>(1.14–1.33) |
| Tocantins        | 1979        | 1.24<br>(1.15–1.33) |
| Tocantins        | 1980        | 1.28<br>(1.18–1.37) |
| Tocantins        | 1981        | 1.25<br>(1.16–1.34) |
| Tocantins        | 1982        | 1.25<br>(1.17–1.34) |
| Tocantins        | 1983        | 1.27<br>(1.19–1.36) |
| Tocantins        | 1984        | 1.26<br>(1.18–1.34) |
| Tocantins        | 1985        | 1.29<br>(1.22–1.37) |
| Tocantins        | 1986        | 1.28<br>(1.21–1.35) |
| Tocantins        | 1987        | 1.28<br>(1.21–1.35) |
| Tocantins        | 1988        | 1.26<br>(1.19–1.33) |
| Tocantins        | 1989        | 1.27<br>(1.19–1.35) |
| Tocantins        | 1990        | 1.27<br>(1.18–1.36) |
| Tocantins        | 1991        | 1.29<br>(1.2–1.39)  |
| Tocantins        | 1992        | 1.28<br>(1.18–1.38) |
| Tocantins        | 1993        | 1.25<br>(1.16–1.35) |
| Tocantins        | 1994        | 1.23<br>(1.15–1.33) |
| Tocantins        | 1995        | 1.24<br>(1.15–1.35) |
| Tocantins        | 1996        | 1.25<br>(1.15–1.36) |
| Tocantins        | 1997        | 1.25<br>(1.16–1.36) |
| Tocantins        | 1998        | 1.26<br>(1.16–1.36) |
| Tocantins        | 1999        | 1.26<br>(1.17–1.36) |
| Tocantins        | 2000        | 1.26<br>(1.18–1.34) |
| Tocantins        | 2001        | 1.29<br>(1.22–1.36) |
| Tocantins        | 2002        | 1.3<br>(1.23–1.36)  |

**Table 15 Ratio of adjusted to unadjusted 5q0 values for scaled locations by year**

| <b>Geography</b> | <b>Year</b> | <b>Ratio</b>        |
|------------------|-------------|---------------------|
| Tocantins        | 2003        | 1.29<br>(1.21–1.37) |
| Tocantins        | 2004        | 1.29<br>(1.19–1.39) |
| Tocantins        | 2005        | 1.29<br>(1.17–1.4)  |
| Tocantins        | 2006        | 1.28<br>(1.16–1.41) |
| Tocantins        | 2007        | 1.28<br>(1.15–1.4)  |
| Tocantins        | 2008        | 1.27<br>(1.15–1.39) |
| Tocantins        | 2009        | 1.25<br>(1.13–1.37) |
| Tocantins        | 2010        | 1.24<br>(1.12–1.37) |
| Tocantins        | 2011        | 1.22<br>(1.1–1.35)  |
| Tocantins        | 2012        | 1.21<br>(1.08–1.34) |
| Tocantins        | 2013        | 1.19<br>(1.07–1.32) |
| Tocantins        | 2014        | 1.18<br>(1.07–1.3)  |
| Tocantins        | 2015        | 1.16<br>(1.06–1.28) |
| Tocantins        | 2016        | 1.15<br>(1.04–1.26) |
| Tocantins        | 2017        | 1.16<br>(1.05–1.28) |
| India            | 1950        | 1.0<br>(1.0–1.0)    |
| India            | 1951        | 1.0<br>(1.0–1.0)    |
| India            | 1952        | 1.0<br>(1.0–1.0)    |
| India            | 1953        | 1.0<br>(1.0–1.0)    |
| India            | 1954        | 1.0<br>(1.0–1.0)    |
| India            | 1955        | 1.0<br>(1.0–1.0)    |
| India            | 1956        | 1.0<br>(1.0–1.0)    |
| India            | 1957        | 1.0<br>(1.0–1.0)    |
| India            | 1958        | 1.0<br>(1.0–1.0)    |
| India            | 1959        | 1.0<br>(1.0–1.0)    |
| India            | 1960        | 1.0<br>(1.0–1.0)    |
| India            | 1961        | 1.0<br>(1.0–1.0)    |
| India            | 1962        | 1.0<br>(1.0–1.0)    |
| India            | 1963        | 1.0<br>(1.0–1.0)    |
| India            | 1964        | 1.0<br>(1.0–1.0)    |
| India            | 1965        | 1.0<br>(1.0–1.0)    |

**Table 15 Ratio of adjusted to unadjusted 5q0 values for scaled locations by year**

| <b>Geography</b> | <b>Year</b> | <b>Ratio</b>     |
|------------------|-------------|------------------|
| India            | 1966        | 1.0<br>(1.0–1.0) |
| India            | 1967        | 1.0<br>(1.0–1.0) |
| India            | 1968        | 1.0<br>(1.0–1.0) |
| India            | 1969        | 1.0<br>(1.0–1.0) |
| India            | 1970        | 1.0<br>(1.0–1.0) |
| India            | 1971        | 1.0<br>(1.0–1.0) |
| India            | 1972        | 1.0<br>(1.0–1.0) |
| India            | 1973        | 1.0<br>(1.0–1.0) |
| India            | 1974        | 1.0<br>(1.0–1.0) |
| India            | 1975        | 1.0<br>(1.0–1.0) |
| India            | 1976        | 1.0<br>(1.0–1.0) |
| India            | 1977        | 1.0<br>(1.0–1.0) |
| India            | 1978        | 1.0<br>(1.0–1.0) |
| India            | 1979        | 1.0<br>(1.0–1.0) |
| India            | 1980        | 1.0<br>(1.0–1.0) |
| India            | 1981        | 1.0<br>(1.0–1.0) |
| India            | 1982        | 1.0<br>(1.0–1.0) |
| India            | 1983        | 1.0<br>(1.0–1.0) |
| India            | 1984        | 1.0<br>(1.0–1.0) |
| India            | 1985        | 1.0<br>(1.0–1.0) |
| India            | 1986        | 1.0<br>(1.0–1.0) |
| India            | 1987        | 1.0<br>(1.0–1.0) |
| India            | 1988        | 1.0<br>(1.0–1.0) |
| India            | 1989        | 1.0<br>(1.0–1.0) |
| India            | 1990        | 1.0<br>(1.0–1.0) |
| India            | 1991        | 1.0<br>(1.0–1.0) |
| India            | 1992        | 1.0<br>(1.0–1.0) |
| India            | 1993        | 1.0<br>(1.0–1.0) |
| India            | 1994        | 1.0<br>(1.0–1.0) |
| India            | 1995        | 1.0<br>(1.0–1.0) |
| India            | 1996        | 1.0<br>(1.0–1.0) |

**Table 15 Ratio of adjusted to unadjusted 5q0 values for scaled locations by year**

| <b>Geography</b> | <b>Year</b> | <b>Ratio</b>        |
|------------------|-------------|---------------------|
| India            | 1997        | 1.0<br>(1.0–1.0)    |
| India            | 1998        | 1.0<br>(1.0–1.0)    |
| India            | 1999        | 1.0<br>(1.0–1.0)    |
| India            | 2000        | 1.0<br>(1.0–1.0)    |
| India            | 2001        | 1.0<br>(1.0–1.0)    |
| India            | 2002        | 1.0<br>(1.0–1.0)    |
| India            | 2003        | 1.0<br>(1.0–1.0)    |
| India            | 2004        | 1.0<br>(1.0–1.0)    |
| India            | 2005        | 1.0<br>(1.0–1.0)    |
| India            | 2006        | 1.0<br>(1.0–1.0)    |
| India            | 2007        | 1.0<br>(1.0–1.0)    |
| India            | 2008        | 1.0<br>(1.0–1.0)    |
| India            | 2009        | 1.0<br>(1.0–1.0)    |
| India            | 2010        | 1.0<br>(1.0–1.0)    |
| India            | 2011        | 1.0<br>(1.0–1.0)    |
| India            | 2012        | 1.0<br>(1.0–1.0)    |
| India            | 2013        | 1.0<br>(1.0–1.0)    |
| India            | 2014        | 1.0<br>(1.0–1.0)    |
| India            | 2015        | 1.0<br>(1.0–1.0)    |
| India            | 2016        | 1.0<br>(1.0–1.0)    |
| India            | 2017        | 1.0<br>(1.0–1.0)    |
| Andhra Pradesh   | 1950        | 1.19<br>(1.16–1.22) |
| Andhra Pradesh   | 1951        | 1.17<br>(1.09–1.25) |
| Andhra Pradesh   | 1952        | 1.16<br>(1.04–1.29) |
| Andhra Pradesh   | 1953        | 1.17<br>(0.99–1.36) |
| Andhra Pradesh   | 1954        | 1.16<br>(0.94–1.39) |
| Andhra Pradesh   | 1955        | 1.15<br>(0.91–1.42) |
| Andhra Pradesh   | 1956        | 1.16<br>(0.89–1.48) |
| Andhra Pradesh   | 1957        | 1.19<br>(0.89–1.53) |
| Andhra Pradesh   | 1958        | 1.23<br>(0.89–1.61) |
| Andhra Pradesh   | 1959        | 1.24<br>(0.89–1.66) |

**Table 15 Ratio of adjusted to unadjusted 5q0 values for scaled locations by year**

| <b>Geography</b> | <b>Year</b> | <b>Ratio</b>        |
|------------------|-------------|---------------------|
| Andhra Pradesh   | 1960        | 1.3<br>(0.92–1.7)   |
| Andhra Pradesh   | 1961        | 1.31<br>(0.95–1.74) |
| Andhra Pradesh   | 1962        | 1.31<br>(0.94–1.75) |
| Andhra Pradesh   | 1963        | 1.33<br>(0.96–1.77) |
| Andhra Pradesh   | 1964        | 1.33<br>(0.98–1.76) |
| Andhra Pradesh   | 1965        | 1.37<br>(1.01–1.78) |
| Andhra Pradesh   | 1966        | 1.38<br>(1.02–1.78) |
| Andhra Pradesh   | 1967        | 1.4<br>(1.05–1.77)  |
| Andhra Pradesh   | 1968        | 1.39<br>(1.07–1.74) |
| Andhra Pradesh   | 1969        | 1.4<br>(1.1–1.73)   |
| Andhra Pradesh   | 1970        | 1.4<br>(1.1–1.72)   |
| Andhra Pradesh   | 1971        | 1.41<br>(1.13–1.72) |
| Andhra Pradesh   | 1972        | 1.42<br>(1.14–1.73) |
| Andhra Pradesh   | 1973        | 1.44<br>(1.16–1.76) |
| Andhra Pradesh   | 1974        | 1.43<br>(1.17–1.75) |
| Andhra Pradesh   | 1975        | 1.45<br>(1.17–1.75) |
| Andhra Pradesh   | 1976        | 1.43<br>(1.18–1.74) |
| Andhra Pradesh   | 1977        | 1.41<br>(1.17–1.7)  |
| Andhra Pradesh   | 1978        | 1.39<br>(1.17–1.67) |
| Andhra Pradesh   | 1979        | 1.36<br>(1.14–1.62) |
| Andhra Pradesh   | 1980        | 1.3<br>(1.1–1.54)   |
| Andhra Pradesh   | 1981        | 1.28<br>(1.09–1.5)  |
| Andhra Pradesh   | 1982        | 1.25<br>(1.07–1.48) |
| Andhra Pradesh   | 1983        | 1.23<br>(1.06–1.45) |
| Andhra Pradesh   | 1984        | 1.22<br>(1.04–1.42) |
| Andhra Pradesh   | 1985        | 1.2<br>(1.03–1.4)   |
| Andhra Pradesh   | 1986        | 1.19<br>(1.01–1.39) |
| Andhra Pradesh   | 1987        | 1.19<br>(1.02–1.37) |
| Andhra Pradesh   | 1988        | 1.19<br>(1.03–1.36) |
| Andhra Pradesh   | 1989        | 1.19<br>(1.05–1.34) |
| Andhra Pradesh   | 1990        | 1.2<br>(1.06–1.35)  |

**Table 15 Ratio of adjusted to unadjusted 5q0 values for scaled locations by year**

| <b>Geography</b>  | <b>Year</b> | <b>Ratio</b>        |
|-------------------|-------------|---------------------|
| Andhra Pradesh    | 1991        | 1.2<br>(1.05–1.37)  |
| Andhra Pradesh    | 1992        | 1.21<br>(1.05–1.39) |
| Andhra Pradesh    | 1993        | 1.2<br>(1.04–1.39)  |
| Andhra Pradesh    | 1994        | 1.2<br>(1.03–1.4)   |
| Andhra Pradesh    | 1995        | 1.21<br>(1.04–1.42) |
| Andhra Pradesh    | 1996        | 1.21<br>(1.03–1.4)  |
| Andhra Pradesh    | 1997        | 1.21<br>(1.04–1.4)  |
| Andhra Pradesh    | 1998        | 1.21<br>(1.06–1.37) |
| Andhra Pradesh    | 1999        | 1.2<br>(1.07–1.34)  |
| Andhra Pradesh    | 2000        | 1.2<br>(1.1–1.31)   |
| Andhra Pradesh    | 2001        | 1.19<br>(1.09–1.31) |
| Andhra Pradesh    | 2002        | 1.18<br>(1.07–1.31) |
| Andhra Pradesh    | 2003        | 1.18<br>(1.04–1.32) |
| Andhra Pradesh    | 2004        | 1.17<br>(1.01–1.34) |
| Andhra Pradesh    | 2005        | 1.17<br>(1.0–1.36)  |
| Andhra Pradesh    | 2006        | 1.16<br>(0.96–1.38) |
| Andhra Pradesh    | 2007        | 1.16<br>(0.94–1.41) |
| Andhra Pradesh    | 2008        | 1.17<br>(0.94–1.45) |
| Andhra Pradesh    | 2009        | 1.17<br>(0.93–1.47) |
| Andhra Pradesh    | 2010        | 1.19<br>(0.93–1.51) |
| Andhra Pradesh    | 2011        | 1.2<br>(0.93–1.51)  |
| Andhra Pradesh    | 2012        | 1.19<br>(0.91–1.54) |
| Andhra Pradesh    | 2013        | 1.21<br>(0.9–1.59)  |
| Andhra Pradesh    | 2014        | 1.21<br>(0.88–1.64) |
| Andhra Pradesh    | 2015        | 1.24<br>(0.88–1.77) |
| Andhra Pradesh    | 2016        | 1.24<br>(0.84–1.79) |
| Andhra Pradesh    | 2017        | 1.24<br>(0.82–1.84) |
| Arunachal Pradesh | 1950        | 0.89<br>(0.88–0.89) |
| Arunachal Pradesh | 1951        | 0.87<br>(0.83–0.91) |
| Arunachal Pradesh | 1952        | 0.87<br>(0.81–0.93) |
| Arunachal Pradesh | 1953        | 0.87<br>(0.8–0.95)  |

**Table 15 Ratio of adjusted to unadjusted 5q0 values for scaled locations by year**

| <b>Geography</b>  | <b>Year</b> | <b>Ratio</b>        |
|-------------------|-------------|---------------------|
| Arunachal Pradesh | 1954        | 0.86<br>(0.79–0.94) |
| Arunachal Pradesh | 1955        | 0.86<br>(0.77–0.94) |
| Arunachal Pradesh | 1956        | 0.87<br>(0.77–0.97) |
| Arunachal Pradesh | 1957        | 0.89<br>(0.77–1.01) |
| Arunachal Pradesh | 1958        | 0.92<br>(0.78–1.05) |
| Arunachal Pradesh | 1959        | 0.92<br>(0.79–1.07) |
| Arunachal Pradesh | 1960        | 0.96<br>(0.82–1.12) |
| Arunachal Pradesh | 1961        | 0.98<br>(0.84–1.13) |
| Arunachal Pradesh | 1962        | 0.98<br>(0.83–1.12) |
| Arunachal Pradesh | 1963        | 0.98<br>(0.85–1.12) |
| Arunachal Pradesh | 1964        | 0.99<br>(0.87–1.11) |
| Arunachal Pradesh | 1965        | 1.02<br>(0.91–1.13) |
| Arunachal Pradesh | 1966        | 1.03<br>(0.93–1.12) |
| Arunachal Pradesh | 1967        | 1.04<br>(0.95–1.14) |
| Arunachal Pradesh | 1968        | 1.02<br>(0.93–1.13) |
| Arunachal Pradesh | 1969        | 1.02<br>(0.93–1.13) |
| Arunachal Pradesh | 1970        | 1.02<br>(0.92–1.13) |
| Arunachal Pradesh | 1971        | 1.02<br>(0.92–1.12) |
| Arunachal Pradesh | 1972        | 1.02<br>(0.93–1.12) |
| Arunachal Pradesh | 1973        | 1.03<br>(0.94–1.12) |
| Arunachal Pradesh | 1974        | 1.03<br>(0.94–1.12) |
| Arunachal Pradesh | 1975        | 1.04<br>(0.95–1.14) |
| Arunachal Pradesh | 1976        | 1.05<br>(0.96–1.15) |
| Arunachal Pradesh | 1977        | 1.04<br>(0.96–1.14) |
| Arunachal Pradesh | 1978        | 1.04<br>(0.95–1.14) |
| Arunachal Pradesh | 1979        | 1.02<br>(0.94–1.12) |
| Arunachal Pradesh | 1980        | 1.01<br>(0.93–1.09) |
| Arunachal Pradesh | 1981        | 1.0<br>(0.92–1.09)  |
| Arunachal Pradesh | 1982        | 0.99<br>(0.92–1.08) |
| Arunachal Pradesh | 1983        | 0.99<br>(0.91–1.08) |
| Arunachal Pradesh | 1984        | 0.99<br>(0.91–1.07) |

**Table 15 Ratio of adjusted to unadjusted 5q0 values for scaled locations by year**

| <b>Geography</b>  | <b>Year</b> | <b>Ratio</b>        |
|-------------------|-------------|---------------------|
| Arunachal Pradesh | 1985        | 0.98<br>(0.9–1.06)  |
| Arunachal Pradesh | 1986        | 0.97<br>(0.9–1.05)  |
| Arunachal Pradesh | 1987        | 0.97<br>(0.9–1.05)  |
| Arunachal Pradesh | 1988        | 0.97<br>(0.9–1.05)  |
| Arunachal Pradesh | 1989        | 0.97<br>(0.9–1.05)  |
| Arunachal Pradesh | 1990        | 0.97<br>(0.89–1.05) |
| Arunachal Pradesh | 1991        | 0.97<br>(0.89–1.06) |
| Arunachal Pradesh | 1992        | 0.97<br>(0.89–1.05) |
| Arunachal Pradesh | 1993        | 0.96<br>(0.89–1.05) |
| Arunachal Pradesh | 1994        | 0.96<br>(0.88–1.05) |
| Arunachal Pradesh | 1995        | 0.97<br>(0.89–1.04) |
| Arunachal Pradesh | 1996        | 0.96<br>(0.89–1.03) |
| Arunachal Pradesh | 1997        | 0.96<br>(0.89–1.03) |
| Arunachal Pradesh | 1998        | 0.96<br>(0.89–1.03) |
| Arunachal Pradesh | 1999        | 0.96<br>(0.89–1.04) |
| Arunachal Pradesh | 2000        | 0.97<br>(0.9–1.05)  |
| Arunachal Pradesh | 2001        | 0.97<br>(0.89–1.05) |
| Arunachal Pradesh | 2002        | 0.96<br>(0.89–1.04) |
| Arunachal Pradesh | 2003        | 0.96<br>(0.9–1.03)  |
| Arunachal Pradesh | 2004        | 0.97<br>(0.9–1.04)  |
| Arunachal Pradesh | 2005        | 0.97<br>(0.9–1.04)  |
| Arunachal Pradesh | 2006        | 0.97<br>(0.89–1.05) |
| Arunachal Pradesh | 2007        | 0.97<br>(0.88–1.08) |
| Arunachal Pradesh | 2008        | 0.98<br>(0.89–1.09) |
| Arunachal Pradesh | 2009        | 0.99<br>(0.89–1.1)  |
| Arunachal Pradesh | 2010        | 1.0<br>(0.89–1.1)   |
| Arunachal Pradesh | 2011        | 1.01<br>(0.9–1.13)  |
| Arunachal Pradesh | 2012        | 1.04<br>(0.92–1.17) |
| Arunachal Pradesh | 2013        | 1.06<br>(0.93–1.21) |
| Arunachal Pradesh | 2014        | 1.05<br>(0.91–1.22) |
| Arunachal Pradesh | 2015        | 1.08<br>(0.92–1.29) |



**Table 15 Ratio of adjusted to unadjusted 5q0 values for scaled locations by year**

| <b>Geography</b>  | <b>Year</b> | <b>Ratio</b>        |
|-------------------|-------------|---------------------|
| Arunachal Pradesh | 2016        | 1.08<br>(0.9–1.3)   |
| Arunachal Pradesh | 2017        | 1.08<br>(0.89–1.3)  |
| Assam             | 1950        | 0.89<br>(0.88–0.89) |
| Assam             | 1951        | 0.87<br>(0.83–0.91) |
| Assam             | 1952        | 0.87<br>(0.81–0.93) |
| Assam             | 1953        | 0.87<br>(0.8–0.95)  |
| Assam             | 1954        | 0.86<br>(0.79–0.94) |
| Assam             | 1955        | 0.86<br>(0.77–0.94) |
| Assam             | 1956        | 0.87<br>(0.77–0.97) |
| Assam             | 1957        | 0.89<br>(0.77–1.01) |
| Assam             | 1958        | 0.91<br>(0.78–1.05) |
| Assam             | 1959        | 0.92<br>(0.79–1.07) |
| Assam             | 1960        | 0.96<br>(0.82–1.12) |
| Assam             | 1961        | 0.98<br>(0.84–1.13) |
| Assam             | 1962        | 0.98<br>(0.83–1.12) |
| Assam             | 1963        | 0.98<br>(0.85–1.12) |
| Assam             | 1964        | 0.99<br>(0.87–1.11) |
| Assam             | 1965        | 1.02<br>(0.91–1.13) |
| Assam             | 1966        | 1.03<br>(0.93–1.13) |
| Assam             | 1967        | 1.04<br>(0.95–1.14) |
| Assam             | 1968        | 1.02<br>(0.93–1.13) |
| Assam             | 1969        | 1.02<br>(0.93–1.13) |
| Assam             | 1970        | 1.02<br>(0.92–1.13) |
| Assam             | 1971        | 1.02<br>(0.92–1.12) |
| Assam             | 1972        | 1.02<br>(0.93–1.12) |
| Assam             | 1973        | 1.03<br>(0.94–1.12) |
| Assam             | 1974        | 1.03<br>(0.94–1.12) |
| Assam             | 1975        | 1.04<br>(0.95–1.14) |
| Assam             | 1976        | 1.05<br>(0.96–1.15) |
| Assam             | 1977        | 1.04<br>(0.96–1.14) |
| Assam             | 1978        | 1.04<br>(0.95–1.14) |

**Table 15 Ratio of adjusted to unadjusted 5q0 values for scaled locations by year**

| <b>Geography</b> | <b>Year</b> | <b>Ratio</b>        |
|------------------|-------------|---------------------|
| Assam            | 1979        | 1.02<br>(0.94–1.12) |
| Assam            | 1980        | 1.01<br>(0.93–1.09) |
| Assam            | 1981        | 1.0<br>(0.92–1.09)  |
| Assam            | 1982        | 0.99<br>(0.92–1.08) |
| Assam            | 1983        | 0.99<br>(0.91–1.08) |
| Assam            | 1984        | 0.99<br>(0.91–1.07) |
| Assam            | 1985        | 0.98<br>(0.9–1.06)  |
| Assam            | 1986        | 0.97<br>(0.9–1.05)  |
| Assam            | 1987        | 0.97<br>(0.9–1.05)  |
| Assam            | 1988        | 0.97<br>(0.9–1.05)  |
| Assam            | 1989        | 0.97<br>(0.9–1.05)  |
| Assam            | 1990        | 0.97<br>(0.9–1.05)  |
| Assam            | 1991        | 0.97<br>(0.89–1.06) |
| Assam            | 1992        | 0.97<br>(0.89–1.05) |
| Assam            | 1993        | 0.96<br>(0.89–1.05) |
| Assam            | 1994        | 0.96<br>(0.88–1.05) |
| Assam            | 1995        | 0.97<br>(0.89–1.04) |
| Assam            | 1996        | 0.96<br>(0.89–1.03) |
| Assam            | 1997        | 0.96<br>(0.89–1.03) |
| Assam            | 1998        | 0.96<br>(0.9–1.03)  |
| Assam            | 1999        | 0.96<br>(0.89–1.04) |
| Assam            | 2000        | 0.97<br>(0.9–1.05)  |
| Assam            | 2001        | 0.97<br>(0.89–1.05) |
| Assam            | 2002        | 0.96<br>(0.9–1.04)  |
| Assam            | 2003        | 0.96<br>(0.9–1.03)  |
| Assam            | 2004        | 0.97<br>(0.9–1.04)  |
| Assam            | 2005        | 0.97<br>(0.9–1.04)  |
| Assam            | 2006        | 0.97<br>(0.89–1.04) |
| Assam            | 2007        | 0.97<br>(0.88–1.07) |
| Assam            | 2008        | 0.98<br>(0.89–1.09) |
| Assam            | 2009        | 0.99<br>(0.89–1.09) |

**Table 15 Ratio of adjusted to unadjusted 5q0 values for scaled locations by year**

| <b>Geography</b> | <b>Year</b> | <b>Ratio</b>        |
|------------------|-------------|---------------------|
| Assam            | 2010        | 1.0<br>(0.89–1.1)   |
| Assam            | 2011        | 1.01<br>(0.9–1.12)  |
| Assam            | 2012        | 1.04<br>(0.92–1.16) |
| Assam            | 2013        | 1.06<br>(0.93–1.21) |
| Assam            | 2014        | 1.05<br>(0.92–1.22) |
| Assam            | 2015        | 1.08<br>(0.92–1.28) |
| Assam            | 2016        | 1.08<br>(0.9–1.29)  |
| Assam            | 2017        | 1.08<br>(0.89–1.3)  |
| Bihar            | 1950        | 0.88<br>(0.88–0.89) |
| Bihar            | 1951        | 0.87<br>(0.83–0.91) |
| Bihar            | 1952        | 0.87<br>(0.81–0.93) |
| Bihar            | 1953        | 0.87<br>(0.8–0.95)  |
| Bihar            | 1954        | 0.86<br>(0.79–0.93) |
| Bihar            | 1955        | 0.86<br>(0.77–0.94) |
| Bihar            | 1956        | 0.87<br>(0.76–0.97) |
| Bihar            | 1957        | 0.89<br>(0.76–1.01) |
| Bihar            | 1958        | 0.91<br>(0.78–1.05) |
| Bihar            | 1959        | 0.92<br>(0.79–1.07) |
| Bihar            | 1960        | 0.96<br>(0.81–1.12) |
| Bihar            | 1961        | 0.98<br>(0.84–1.13) |
| Bihar            | 1962        | 0.98<br>(0.83–1.12) |
| Bihar            | 1963        | 0.98<br>(0.85–1.12) |
| Bihar            | 1964        | 0.99<br>(0.87–1.11) |
| Bihar            | 1965        | 1.02<br>(0.91–1.13) |
| Bihar            | 1966        | 1.03<br>(0.93–1.13) |
| Bihar            | 1967        | 1.04<br>(0.95–1.14) |
| Bihar            | 1968        | 1.02<br>(0.93–1.13) |
| Bihar            | 1969        | 1.02<br>(0.93–1.13) |
| Bihar            | 1970        | 1.02<br>(0.92–1.13) |
| Bihar            | 1971        | 1.02<br>(0.92–1.12) |
| Bihar            | 1972        | 1.02<br>(0.93–1.12) |

**Table 15 Ratio of adjusted to unadjusted 5q0 values for scaled locations by year**

| <b>Geography</b> | <b>Year</b> | <b>Ratio</b>        |
|------------------|-------------|---------------------|
| Bihar            | 1973        | 1.03<br>(0.94–1.12) |
| Bihar            | 1974        | 1.03<br>(0.94–1.12) |
| Bihar            | 1975        | 1.04<br>(0.96–1.14) |
| Bihar            | 1976        | 1.05<br>(0.96–1.14) |
| Bihar            | 1977        | 1.04<br>(0.96–1.14) |
| Bihar            | 1978        | 1.04<br>(0.95–1.14) |
| Bihar            | 1979        | 1.02<br>(0.94–1.12) |
| Bihar            | 1980        | 1.01<br>(0.93–1.09) |
| Bihar            | 1981        | 1.0<br>(0.92–1.08)  |
| Bihar            | 1982        | 0.99<br>(0.92–1.08) |
| Bihar            | 1983        | 0.99<br>(0.91–1.07) |
| Bihar            | 1984        | 0.99<br>(0.91–1.07) |
| Bihar            | 1985        | 0.98<br>(0.9–1.06)  |
| Bihar            | 1986        | 0.97<br>(0.9–1.05)  |
| Bihar            | 1987        | 0.97<br>(0.9–1.05)  |
| Bihar            | 1988        | 0.97<br>(0.9–1.05)  |
| Bihar            | 1989        | 0.97<br>(0.9–1.05)  |
| Bihar            | 1990        | 0.97<br>(0.9–1.05)  |
| Bihar            | 1991        | 0.97<br>(0.89–1.05) |
| Bihar            | 1992        | 0.97<br>(0.89–1.05) |
| Bihar            | 1993        | 0.96<br>(0.89–1.05) |
| Bihar            | 1994        | 0.96<br>(0.88–1.05) |
| Bihar            | 1995        | 0.97<br>(0.89–1.04) |
| Bihar            | 1996        | 0.96<br>(0.89–1.03) |
| Bihar            | 1997        | 0.96<br>(0.9–1.03)  |
| Bihar            | 1998        | 0.96<br>(0.9–1.03)  |
| Bihar            | 1999        | 0.96<br>(0.89–1.04) |
| Bihar            | 2000        | 0.97<br>(0.9–1.05)  |
| Bihar            | 2001        | 0.97<br>(0.89–1.05) |
| Bihar            | 2002        | 0.96<br>(0.9–1.04)  |
| Bihar            | 2003        | 0.96<br>(0.9–1.03)  |

**Table 15 Ratio of adjusted to unadjusted 5q0 values for scaled locations by year**

| <b>Geography</b> | <b>Year</b> | <b>Ratio</b>        |
|------------------|-------------|---------------------|
| Bihar            | 2004        | 0.97<br>(0.9–1.04)  |
| Bihar            | 2005        | 0.97<br>(0.9–1.04)  |
| Bihar            | 2006        | 0.97<br>(0.89–1.04) |
| Bihar            | 2007        | 0.97<br>(0.88–1.08) |
| Bihar            | 2008        | 0.98<br>(0.89–1.09) |
| Bihar            | 2009        | 0.99<br>(0.89–1.1)  |
| Bihar            | 2010        | 1.0<br>(0.89–1.1)   |
| Bihar            | 2011        | 1.01<br>(0.9–1.13)  |
| Bihar            | 2012        | 1.04<br>(0.92–1.16) |
| Bihar            | 2013        | 1.06<br>(0.93–1.21) |
| Bihar            | 2014        | 1.05<br>(0.92–1.22) |
| Bihar            | 2015        | 1.08<br>(0.92–1.28) |
| Bihar            | 2016        | 1.08<br>(0.9–1.29)  |
| Bihar            | 2017        | 1.08<br>(0.89–1.3)  |
| Chhattisgarh     | 1950        | 0.88<br>(0.88–0.89) |
| Chhattisgarh     | 1951        | 0.87<br>(0.83–0.91) |
| Chhattisgarh     | 1952        | 0.87<br>(0.81–0.93) |
| Chhattisgarh     | 1953        | 0.87<br>(0.8–0.95)  |
| Chhattisgarh     | 1954        | 0.86<br>(0.79–0.93) |
| Chhattisgarh     | 1955        | 0.86<br>(0.77–0.94) |
| Chhattisgarh     | 1956        | 0.87<br>(0.76–0.97) |
| Chhattisgarh     | 1957        | 0.89<br>(0.76–1.01) |
| Chhattisgarh     | 1958        | 0.91<br>(0.78–1.05) |
| Chhattisgarh     | 1959        | 0.92<br>(0.79–1.07) |
| Chhattisgarh     | 1960        | 0.96<br>(0.81–1.12) |
| Chhattisgarh     | 1961        | 0.98<br>(0.84–1.13) |
| Chhattisgarh     | 1962        | 0.98<br>(0.83–1.13) |
| Chhattisgarh     | 1963        | 0.98<br>(0.85–1.12) |
| Chhattisgarh     | 1964        | 0.99<br>(0.87–1.11) |
| Chhattisgarh     | 1965        | 1.02<br>(0.91–1.13) |
| Chhattisgarh     | 1966        | 1.03<br>(0.93–1.13) |

**Table 15 Ratio of adjusted to unadjusted 5q0 values for scaled locations by year**

| <b>Geography</b> | <b>Year</b> | <b>Ratio</b>        |
|------------------|-------------|---------------------|
| Chhattisgarh     | 1967        | 1.04<br>(0.95–1.14) |
| Chhattisgarh     | 1968        | 1.03<br>(0.93–1.13) |
| Chhattisgarh     | 1969        | 1.02<br>(0.93–1.13) |
| Chhattisgarh     | 1970        | 1.02<br>(0.92–1.13) |
| Chhattisgarh     | 1971        | 1.02<br>(0.92–1.12) |
| Chhattisgarh     | 1972        | 1.02<br>(0.93–1.12) |
| Chhattisgarh     | 1973        | 1.03<br>(0.94–1.12) |
| Chhattisgarh     | 1974        | 1.03<br>(0.94–1.12) |
| Chhattisgarh     | 1975        | 1.04<br>(0.96–1.14) |
| Chhattisgarh     | 1976        | 1.05<br>(0.96–1.14) |
| Chhattisgarh     | 1977        | 1.04<br>(0.96–1.14) |
| Chhattisgarh     | 1978        | 1.04<br>(0.95–1.14) |
| Chhattisgarh     | 1979        | 1.02<br>(0.94–1.12) |
| Chhattisgarh     | 1980        | 1.01<br>(0.93–1.09) |
| Chhattisgarh     | 1981        | 1.0<br>(0.92–1.08)  |
| Chhattisgarh     | 1982        | 0.99<br>(0.92–1.08) |
| Chhattisgarh     | 1983        | 0.99<br>(0.91–1.07) |
| Chhattisgarh     | 1984        | 0.99<br>(0.91–1.07) |
| Chhattisgarh     | 1985        | 0.98<br>(0.9–1.06)  |
| Chhattisgarh     | 1986        | 0.97<br>(0.9–1.05)  |
| Chhattisgarh     | 1987        | 0.97<br>(0.9–1.05)  |
| Chhattisgarh     | 1988        | 0.97<br>(0.9–1.05)  |
| Chhattisgarh     | 1989        | 0.97<br>(0.9–1.05)  |
| Chhattisgarh     | 1990        | 0.97<br>(0.9–1.05)  |
| Chhattisgarh     | 1991        | 0.97<br>(0.89–1.05) |
| Chhattisgarh     | 1992        | 0.97<br>(0.89–1.05) |
| Chhattisgarh     | 1993        | 0.96<br>(0.89–1.05) |
| Chhattisgarh     | 1994        | 0.96<br>(0.88–1.05) |
| Chhattisgarh     | 1995        | 0.97<br>(0.89–1.04) |
| Chhattisgarh     | 1996        | 0.96<br>(0.89–1.03) |
| Chhattisgarh     | 1997        | 0.96<br>(0.89–1.03) |

**Table 15 Ratio of adjusted to unadjusted 5q0 values for scaled locations by year**

| <b>Geography</b> | <b>Year</b> | <b>Ratio</b>        |
|------------------|-------------|---------------------|
| Chhattisgarh     | 1998        | 0.96<br>(0.9–1.03)  |
| Chhattisgarh     | 1999        | 0.96<br>(0.89–1.04) |
| Chhattisgarh     | 2000        | 0.97<br>(0.9–1.05)  |
| Chhattisgarh     | 2001        | 0.97<br>(0.9–1.05)  |
| Chhattisgarh     | 2002        | 0.96<br>(0.9–1.04)  |
| Chhattisgarh     | 2003        | 0.96<br>(0.9–1.03)  |
| Chhattisgarh     | 2004        | 0.97<br>(0.9–1.04)  |
| Chhattisgarh     | 2005        | 0.97<br>(0.9–1.04)  |
| Chhattisgarh     | 2006        | 0.97<br>(0.89–1.04) |
| Chhattisgarh     | 2007        | 0.97<br>(0.88–1.07) |
| Chhattisgarh     | 2008        | 0.98<br>(0.89–1.09) |
| Chhattisgarh     | 2009        | 0.99<br>(0.89–1.09) |
| Chhattisgarh     | 2010        | 1.0<br>(0.89–1.1)   |
| Chhattisgarh     | 2011        | 1.01<br>(0.9–1.12)  |
| Chhattisgarh     | 2012        | 1.04<br>(0.92–1.16) |
| Chhattisgarh     | 2013        | 1.06<br>(0.93–1.21) |
| Chhattisgarh     | 2014        | 1.05<br>(0.92–1.22) |
| Chhattisgarh     | 2015        | 1.08<br>(0.92–1.28) |
| Chhattisgarh     | 2016        | 1.08<br>(0.9–1.29)  |
| Chhattisgarh     | 2017        | 1.08<br>(0.89–1.3)  |
| Delhi            | 1950        | 0.89<br>(0.88–0.89) |
| Delhi            | 1951        | 0.87<br>(0.83–0.91) |
| Delhi            | 1952        | 0.87<br>(0.81–0.93) |
| Delhi            | 1953        | 0.87<br>(0.8–0.95)  |
| Delhi            | 1954        | 0.86<br>(0.78–0.94) |
| Delhi            | 1955        | 0.86<br>(0.77–0.94) |
| Delhi            | 1956        | 0.87<br>(0.76–0.97) |
| Delhi            | 1957        | 0.89<br>(0.76–1.01) |
| Delhi            | 1958        | 0.91<br>(0.78–1.05) |
| Delhi            | 1959        | 0.92<br>(0.78–1.07) |
| Delhi            | 1960        | 0.96<br>(0.81–1.12) |

**Table 15 Ratio of adjusted to unadjusted 5q0 values for scaled locations by year**

| <b>Geography</b> | <b>Year</b> | <b>Ratio</b>        |
|------------------|-------------|---------------------|
| Delhi            | 1961        | 0.98<br>(0.83–1.13) |
| Delhi            | 1962        | 0.98<br>(0.83–1.13) |
| Delhi            | 1963        | 0.98<br>(0.85–1.12) |
| Delhi            | 1964        | 0.99<br>(0.86–1.12) |
| Delhi            | 1965        | 1.02<br>(0.91–1.14) |
| Delhi            | 1966        | 1.03<br>(0.93–1.13) |
| Delhi            | 1967        | 1.04<br>(0.94–1.15) |
| Delhi            | 1968        | 1.03<br>(0.92–1.13) |
| Delhi            | 1969        | 1.03<br>(0.92–1.14) |
| Delhi            | 1970        | 1.02<br>(0.92–1.13) |
| Delhi            | 1971        | 1.02<br>(0.92–1.13) |
| Delhi            | 1972        | 1.02<br>(0.93–1.12) |
| Delhi            | 1973        | 1.03<br>(0.94–1.12) |
| Delhi            | 1974        | 1.03<br>(0.94–1.12) |
| Delhi            | 1975        | 1.05<br>(0.95–1.14) |
| Delhi            | 1976        | 1.05<br>(0.96–1.15) |
| Delhi            | 1977        | 1.05<br>(0.96–1.14) |
| Delhi            | 1978        | 1.04<br>(0.95–1.14) |
| Delhi            | 1979        | 1.02<br>(0.94–1.12) |
| Delhi            | 1980        | 1.01<br>(0.93–1.09) |
| Delhi            | 1981        | 1.0<br>(0.92–1.09)  |
| Delhi            | 1982        | 0.99<br>(0.91–1.08) |
| Delhi            | 1983        | 0.99<br>(0.91–1.08) |
| Delhi            | 1984        | 0.99<br>(0.91–1.07) |
| Delhi            | 1985        | 0.98<br>(0.9–1.06)  |
| Delhi            | 1986        | 0.97<br>(0.9–1.05)  |
| Delhi            | 1987        | 0.97<br>(0.9–1.05)  |
| Delhi            | 1988        | 0.97<br>(0.9–1.06)  |
| Delhi            | 1989        | 0.97<br>(0.9–1.05)  |
| Delhi            | 1990        | 0.97<br>(0.89–1.05) |
| Delhi            | 1991        | 0.97<br>(0.89–1.06) |



**Table 15 Ratio of adjusted to unadjusted 5q0 values for scaled locations by year**

| <b>Geography</b> | <b>Year</b> | <b>Ratio</b>        |
|------------------|-------------|---------------------|
| Delhi            | 1992        | 0.97<br>(0.89–1.05) |
| Delhi            | 1993        | 0.96<br>(0.88–1.05) |
| Delhi            | 1994        | 0.96<br>(0.88–1.05) |
| Delhi            | 1995        | 0.96<br>(0.89–1.04) |
| Delhi            | 1996        | 0.96<br>(0.89–1.03) |
| Delhi            | 1997        | 0.96<br>(0.89–1.03) |
| Delhi            | 1998        | 0.96<br>(0.89–1.03) |
| Delhi            | 1999        | 0.96<br>(0.89–1.04) |
| Delhi            | 2000        | 0.97<br>(0.9–1.05)  |
| Delhi            | 2001        | 0.97<br>(0.89–1.05) |
| Delhi            | 2002        | 0.96<br>(0.89–1.04) |
| Delhi            | 2003        | 0.96<br>(0.9–1.03)  |
| Delhi            | 2004        | 0.97<br>(0.9–1.04)  |
| Delhi            | 2005        | 0.97<br>(0.9–1.04)  |
| Delhi            | 2006        | 0.97<br>(0.89–1.05) |
| Delhi            | 2007        | 0.97<br>(0.88–1.08) |
| Delhi            | 2008        | 0.98<br>(0.89–1.09) |
| Delhi            | 2009        | 0.98<br>(0.89–1.1)  |
| Delhi            | 2010        | 1.0<br>(0.89–1.1)   |
| Delhi            | 2011        | 1.01<br>(0.9–1.13)  |
| Delhi            | 2012        | 1.04<br>(0.92–1.17) |
| Delhi            | 2013        | 1.06<br>(0.93–1.21) |
| Delhi            | 2014        | 1.05<br>(0.91–1.22) |
| Delhi            | 2015        | 1.08<br>(0.92–1.29) |
| Delhi            | 2016        | 1.08<br>(0.9–1.3)   |
| Delhi            | 2017        | 1.08<br>(0.89–1.3)  |
| Goa              | 1950        | 0.88<br>(0.87–0.89) |
| Goa              | 1951        | 0.86<br>(0.82–0.91) |
| Goa              | 1952        | 0.86<br>(0.79–0.93) |
| Goa              | 1953        | 0.86<br>(0.79–0.94) |
| Goa              | 1954        | 0.85<br>(0.77–0.93) |

**Table 15 Ratio of adjusted to unadjusted 5q0 values for scaled locations by year**

| <b>Geography</b> | <b>Year</b> | <b>Ratio</b>        |
|------------------|-------------|---------------------|
| Goa              | 1955        | 0.85<br>(0.75–0.94) |
| Goa              | 1956        | 0.86<br>(0.75–0.97) |
| Goa              | 1957        | 0.88<br>(0.75–1.01) |
| Goa              | 1958        | 0.91<br>(0.77–1.05) |
| Goa              | 1959        | 0.92<br>(0.77–1.07) |
| Goa              | 1960        | 0.96<br>(0.8–1.12)  |
| Goa              | 1961        | 0.97<br>(0.82–1.14) |
| Goa              | 1962        | 0.97<br>(0.82–1.13) |
| Goa              | 1963        | 0.98<br>(0.84–1.13) |
| Goa              | 1964        | 0.99<br>(0.86–1.12) |
| Goa              | 1965        | 1.02<br>(0.9–1.14)  |
| Goa              | 1966        | 1.03<br>(0.93–1.13) |
| Goa              | 1967        | 1.04<br>(0.94–1.15) |
| Goa              | 1968        | 1.03<br>(0.92–1.14) |
| Goa              | 1969        | 1.03<br>(0.92–1.14) |
| Goa              | 1970        | 1.02<br>(0.91–1.14) |
| Goa              | 1971        | 1.02<br>(0.92–1.13) |
| Goa              | 1972        | 1.02<br>(0.92–1.13) |
| Goa              | 1973        | 1.03<br>(0.93–1.12) |
| Goa              | 1974        | 1.03<br>(0.94–1.13) |
| Goa              | 1975        | 1.05<br>(0.95–1.15) |
| Goa              | 1976        | 1.05<br>(0.96–1.15) |
| Goa              | 1977        | 1.05<br>(0.96–1.15) |
| Goa              | 1978        | 1.04<br>(0.95–1.15) |
| Goa              | 1979        | 1.02<br>(0.94–1.13) |
| Goa              | 1980        | 1.01<br>(0.93–1.1)  |
| Goa              | 1981        | 1.0<br>(0.92–1.09)  |
| Goa              | 1982        | 0.99<br>(0.91–1.08) |
| Goa              | 1983        | 0.99<br>(0.91–1.08) |
| Goa              | 1984        | 0.99<br>(0.91–1.07) |
| Goa              | 1985        | 0.97<br>(0.9–1.06)  |

**Table 15 Ratio of adjusted to unadjusted 5q0 values for scaled locations by year**

| <b>Geography</b> | <b>Year</b> | <b>Ratio</b>        |
|------------------|-------------|---------------------|
| Goa              | 1986        | 0.97<br>(0.89–1.05) |
| Goa              | 1987        | 0.97<br>(0.9–1.05)  |
| Goa              | 1988        | 0.97<br>(0.89–1.06) |
| Goa              | 1989        | 0.97<br>(0.9–1.05)  |
| Goa              | 1990        | 0.97<br>(0.89–1.05) |
| Goa              | 1991        | 0.97<br>(0.89–1.06) |
| Goa              | 1992        | 0.97<br>(0.89–1.05) |
| Goa              | 1993        | 0.96<br>(0.88–1.05) |
| Goa              | 1994        | 0.96<br>(0.88–1.05) |
| Goa              | 1995        | 0.96<br>(0.89–1.04) |
| Goa              | 1996        | 0.96<br>(0.89–1.03) |
| Goa              | 1997        | 0.96<br>(0.89–1.03) |
| Goa              | 1998        | 0.96<br>(0.89–1.03) |
| Goa              | 1999        | 0.96<br>(0.89–1.04) |
| Goa              | 2000        | 0.97<br>(0.89–1.05) |
| Goa              | 2001        | 0.97<br>(0.89–1.05) |
| Goa              | 2002        | 0.96<br>(0.89–1.04) |
| Goa              | 2003        | 0.96<br>(0.89–1.03) |
| Goa              | 2004        | 0.97<br>(0.9–1.04)  |
| Goa              | 2005        | 0.97<br>(0.9–1.04)  |
| Goa              | 2006        | 0.97<br>(0.89–1.05) |
| Goa              | 2007        | 0.97<br>(0.88–1.08) |
| Goa              | 2008        | 0.98<br>(0.89–1.09) |
| Goa              | 2009        | 0.98<br>(0.89–1.1)  |
| Goa              | 2010        | 1.0<br>(0.89–1.11)  |
| Goa              | 2011        | 1.01<br>(0.9–1.13)  |
| Goa              | 2012        | 1.04<br>(0.92–1.17) |
| Goa              | 2013        | 1.06<br>(0.93–1.22) |
| Goa              | 2014        | 1.05<br>(0.91–1.22) |
| Goa              | 2015        | 1.08<br>(0.92–1.29) |
| Goa              | 2016        | 1.08<br>(0.9–1.3)   |

**Table 15 Ratio of adjusted to unadjusted 5q0 values for scaled locations by year**

| <b>Geography</b> | <b>Year</b> | <b>Ratio</b>        |
|------------------|-------------|---------------------|
| Goa              | 2017        | 1.08<br>(0.89–1.3)  |
| Gujarat          | 1950        | 0.88<br>(0.87–0.89) |
| Gujarat          | 1951        | 0.87<br>(0.83–0.91) |
| Gujarat          | 1952        | 0.87<br>(0.81–0.93) |
| Gujarat          | 1953        | 0.87<br>(0.8–0.95)  |
| Gujarat          | 1954        | 0.86<br>(0.78–0.93) |
| Gujarat          | 1955        | 0.85<br>(0.77–0.94) |
| Gujarat          | 1956        | 0.87<br>(0.76–0.97) |
| Gujarat          | 1957        | 0.89<br>(0.76–1.01) |
| Gujarat          | 1958        | 0.91<br>(0.78–1.05) |
| Gujarat          | 1959        | 0.92<br>(0.78–1.07) |
| Gujarat          | 1960        | 0.96<br>(0.81–1.12) |
| Gujarat          | 1961        | 0.98<br>(0.83–1.13) |
| Gujarat          | 1962        | 0.98<br>(0.83–1.13) |
| Gujarat          | 1963        | 0.98<br>(0.85–1.12) |
| Gujarat          | 1964        | 0.99<br>(0.86–1.11) |
| Gujarat          | 1965        | 1.02<br>(0.91–1.13) |
| Gujarat          | 1966        | 1.03<br>(0.93–1.13) |
| Gujarat          | 1967        | 1.04<br>(0.94–1.14) |
| Gujarat          | 1968        | 1.03<br>(0.93–1.13) |
| Gujarat          | 1969        | 1.02<br>(0.92–1.14) |
| Gujarat          | 1970        | 1.02<br>(0.92–1.13) |
| Gujarat          | 1971        | 1.02<br>(0.92–1.13) |
| Gujarat          | 1972        | 1.02<br>(0.93–1.12) |
| Gujarat          | 1973        | 1.03<br>(0.94–1.12) |
| Gujarat          | 1974        | 1.03<br>(0.94–1.12) |
| Gujarat          | 1975        | 1.04<br>(0.95–1.14) |
| Gujarat          | 1976        | 1.05<br>(0.96–1.15) |
| Gujarat          | 1977        | 1.04<br>(0.96–1.14) |
| Gujarat          | 1978        | 1.04<br>(0.95–1.14) |
| Gujarat          | 1979        | 1.02<br>(0.94–1.12) |

**Table 15 Ratio of adjusted to unadjusted 5q0 values for scaled locations by year**

| <b>Geography</b> | <b>Year</b> | <b>Ratio</b>        |
|------------------|-------------|---------------------|
| Gujarat          | 1980        | 1.01<br>(0.93–1.09) |
| Gujarat          | 1981        | 1.0<br>(0.92–1.09)  |
| Gujarat          | 1982        | 0.99<br>(0.92–1.08) |
| Gujarat          | 1983        | 0.99<br>(0.91–1.08) |
| Gujarat          | 1984        | 0.99<br>(0.91–1.07) |
| Gujarat          | 1985        | 0.98<br>(0.9–1.06)  |
| Gujarat          | 1986        | 0.97<br>(0.9–1.05)  |
| Gujarat          | 1987        | 0.97<br>(0.9–1.05)  |
| Gujarat          | 1988        | 0.97<br>(0.9–1.05)  |
| Gujarat          | 1989        | 0.97<br>(0.9–1.05)  |
| Gujarat          | 1990        | 0.97<br>(0.89–1.05) |
| Gujarat          | 1991        | 0.97<br>(0.89–1.06) |
| Gujarat          | 1992        | 0.97<br>(0.89–1.05) |
| Gujarat          | 1993        | 0.96<br>(0.89–1.05) |
| Gujarat          | 1994        | 0.96<br>(0.88–1.05) |
| Gujarat          | 1995        | 0.96<br>(0.89–1.04) |
| Gujarat          | 1996        | 0.96<br>(0.89–1.03) |
| Gujarat          | 1997        | 0.96<br>(0.89–1.03) |
| Gujarat          | 1998        | 0.96<br>(0.89–1.03) |
| Gujarat          | 1999        | 0.96<br>(0.89–1.04) |
| Gujarat          | 2000        | 0.97<br>(0.9–1.05)  |
| Gujarat          | 2001        | 0.97<br>(0.89–1.05) |
| Gujarat          | 2002        | 0.96<br>(0.89–1.04) |
| Gujarat          | 2003        | 0.96<br>(0.9–1.03)  |
| Gujarat          | 2004        | 0.97<br>(0.9–1.04)  |
| Gujarat          | 2005        | 0.97<br>(0.9–1.04)  |
| Gujarat          | 2006        | 0.97<br>(0.89–1.05) |
| Gujarat          | 2007        | 0.97<br>(0.88–1.08) |
| Gujarat          | 2008        | 0.98<br>(0.89–1.09) |
| Gujarat          | 2009        | 0.99<br>(0.89–1.1)  |
| Gujarat          | 2010        | 1.0<br>(0.89–1.1)   |

**Table 15 Ratio of adjusted to unadjusted 5q0 values for scaled locations by year**

| <b>Geography</b> | <b>Year</b> | <b>Ratio</b>        |
|------------------|-------------|---------------------|
| Gujarat          | 2011        | 1.01<br>(0.9–1.13)  |
| Gujarat          | 2012        | 1.04<br>(0.92–1.16) |
| Gujarat          | 2013        | 1.06<br>(0.93–1.21) |
| Gujarat          | 2014        | 1.05<br>(0.92–1.22) |
| Gujarat          | 2015        | 1.08<br>(0.92–1.29) |
| Gujarat          | 2016        | 1.08<br>(0.9–1.29)  |
| Gujarat          | 2017        | 1.08<br>(0.89–1.3)  |
| Haryana          | 1950        | 0.88<br>(0.88–0.89) |
| Haryana          | 1951        | 0.87<br>(0.83–0.91) |
| Haryana          | 1952        | 0.87<br>(0.81–0.93) |
| Haryana          | 1953        | 0.87<br>(0.8–0.95)  |
| Haryana          | 1954        | 0.86<br>(0.78–0.93) |
| Haryana          | 1955        | 0.85<br>(0.77–0.94) |
| Haryana          | 1956        | 0.87<br>(0.76–0.97) |
| Haryana          | 1957        | 0.89<br>(0.76–1.01) |
| Haryana          | 1958        | 0.91<br>(0.78–1.05) |
| Haryana          | 1959        | 0.92<br>(0.78–1.07) |
| Haryana          | 1960        | 0.96<br>(0.81–1.12) |
| Haryana          | 1961        | 0.98<br>(0.83–1.13) |
| Haryana          | 1962        | 0.98<br>(0.83–1.13) |
| Haryana          | 1963        | 0.98<br>(0.85–1.12) |
| Haryana          | 1964        | 0.99<br>(0.87–1.11) |
| Haryana          | 1965        | 1.02<br>(0.91–1.13) |
| Haryana          | 1966        | 1.03<br>(0.93–1.13) |
| Haryana          | 1967        | 1.04<br>(0.95–1.14) |
| Haryana          | 1968        | 1.03<br>(0.93–1.13) |
| Haryana          | 1969        | 1.02<br>(0.92–1.14) |
| Haryana          | 1970        | 1.02<br>(0.92–1.13) |
| Haryana          | 1971        | 1.02<br>(0.92–1.13) |
| Haryana          | 1972        | 1.02<br>(0.93–1.12) |
| Haryana          | 1973        | 1.03<br>(0.94–1.12) |

**Table 15 Ratio of adjusted to unadjusted 5q0 values for scaled locations by year**

| <b>Geography</b> | <b>Year</b> | <b>Ratio</b>        |
|------------------|-------------|---------------------|
| Haryana          | 1974        | 1.03<br>(0.94–1.12) |
| Haryana          | 1975        | 1.05<br>(0.95–1.14) |
| Haryana          | 1976        | 1.05<br>(0.96–1.15) |
| Haryana          | 1977        | 1.05<br>(0.96–1.14) |
| Haryana          | 1978        | 1.04<br>(0.95–1.14) |
| Haryana          | 1979        | 1.02<br>(0.94–1.12) |
| Haryana          | 1980        | 1.01<br>(0.93–1.09) |
| Haryana          | 1981        | 1.0<br>(0.92–1.09)  |
| Haryana          | 1982        | 0.99<br>(0.92–1.08) |
| Haryana          | 1983        | 0.99<br>(0.91–1.08) |
| Haryana          | 1984        | 0.99<br>(0.91–1.07) |
| Haryana          | 1985        | 0.98<br>(0.9–1.06)  |
| Haryana          | 1986        | 0.97<br>(0.9–1.05)  |
| Haryana          | 1987        | 0.97<br>(0.9–1.05)  |
| Haryana          | 1988        | 0.97<br>(0.9–1.05)  |
| Haryana          | 1989        | 0.97<br>(0.9–1.05)  |
| Haryana          | 1990        | 0.97<br>(0.89–1.05) |
| Haryana          | 1991        | 0.97<br>(0.89–1.06) |
| Haryana          | 1992        | 0.97<br>(0.89–1.05) |
| Haryana          | 1993        | 0.96<br>(0.88–1.05) |
| Haryana          | 1994        | 0.96<br>(0.88–1.05) |
| Haryana          | 1995        | 0.96<br>(0.89–1.04) |
| Haryana          | 1996        | 0.96<br>(0.89–1.03) |
| Haryana          | 1997        | 0.96<br>(0.89–1.03) |
| Haryana          | 1998        | 0.96<br>(0.89–1.03) |
| Haryana          | 1999        | 0.96<br>(0.89–1.04) |
| Haryana          | 2000        | 0.97<br>(0.9–1.05)  |
| Haryana          | 2001        | 0.97<br>(0.89–1.05) |
| Haryana          | 2002        | 0.96<br>(0.89–1.04) |
| Haryana          | 2003        | 0.96<br>(0.9–1.03)  |
| Haryana          | 2004        | 0.97<br>(0.9–1.04)  |

**Table 15 Ratio of adjusted to unadjusted 5q0 values for scaled locations by year**

| <b>Geography</b> | <b>Year</b> | <b>Ratio</b>        |
|------------------|-------------|---------------------|
| Haryana          | 2005        | 0.97<br>(0.9–1.04)  |
| Haryana          | 2006        | 0.97<br>(0.89–1.05) |
| Haryana          | 2007        | 0.97<br>(0.88–1.08) |
| Haryana          | 2008        | 0.98<br>(0.89–1.09) |
| Haryana          | 2009        | 0.99<br>(0.89–1.1)  |
| Haryana          | 2010        | 1.0<br>(0.89–1.1)   |
| Haryana          | 2011        | 1.01<br>(0.9–1.13)  |
| Haryana          | 2012        | 1.04<br>(0.92–1.16) |
| Haryana          | 2013        | 1.06<br>(0.93–1.21) |
| Haryana          | 2014        | 1.05<br>(0.92–1.22) |
| Haryana          | 2015        | 1.08<br>(0.92–1.29) |
| Haryana          | 2016        | 1.08<br>(0.9–1.29)  |
| Haryana          | 2017        | 1.08<br>(0.89–1.3)  |
| Himachal Pradesh | 1950        | 0.88<br>(0.87–0.89) |
| Himachal Pradesh | 1951        | 0.86<br>(0.82–0.91) |
| Himachal Pradesh | 1952        | 0.86<br>(0.8–0.93)  |
| Himachal Pradesh | 1953        | 0.86<br>(0.79–0.94) |
| Himachal Pradesh | 1954        | 0.85<br>(0.78–0.93) |
| Himachal Pradesh | 1955        | 0.85<br>(0.76–0.94) |
| Himachal Pradesh | 1956        | 0.86<br>(0.75–0.97) |
| Himachal Pradesh | 1957        | 0.88<br>(0.75–1.01) |
| Himachal Pradesh | 1958        | 0.91<br>(0.77–1.05) |
| Himachal Pradesh | 1959        | 0.92<br>(0.78–1.07) |
| Himachal Pradesh | 1960        | 0.96<br>(0.81–1.12) |
| Himachal Pradesh | 1961        | 0.97<br>(0.83–1.14) |
| Himachal Pradesh | 1962        | 0.97<br>(0.82–1.13) |
| Himachal Pradesh | 1963        | 0.98<br>(0.84–1.13) |
| Himachal Pradesh | 1964        | 0.99<br>(0.86–1.12) |
| Himachal Pradesh | 1965        | 1.02<br>(0.91–1.14) |
| Himachal Pradesh | 1966        | 1.03<br>(0.93–1.13) |
| Himachal Pradesh | 1967        | 1.04<br>(0.94–1.15) |



**Table 15 Ratio of adjusted to unadjusted 5q0 values for scaled locations by year**

| <b>Geography</b> | <b>Year</b> | <b>Ratio</b>        |
|------------------|-------------|---------------------|
| Himachal Pradesh | 1968        | 1.03<br>(0.92–1.13) |
| Himachal Pradesh | 1969        | 1.03<br>(0.92–1.14) |
| Himachal Pradesh | 1970        | 1.02<br>(0.92–1.13) |
| Himachal Pradesh | 1971        | 1.02<br>(0.92–1.13) |
| Himachal Pradesh | 1972        | 1.02<br>(0.92–1.13) |
| Himachal Pradesh | 1973        | 1.03<br>(0.93–1.12) |
| Himachal Pradesh | 1974        | 1.03<br>(0.94–1.13) |
| Himachal Pradesh | 1975        | 1.05<br>(0.95–1.14) |
| Himachal Pradesh | 1976        | 1.05<br>(0.96–1.15) |
| Himachal Pradesh | 1977        | 1.05<br>(0.96–1.14) |
| Himachal Pradesh | 1978        | 1.04<br>(0.95–1.14) |
| Himachal Pradesh | 1979        | 1.02<br>(0.94–1.12) |
| Himachal Pradesh | 1980        | 1.01<br>(0.93–1.09) |
| Himachal Pradesh | 1981        | 1.0<br>(0.92–1.09)  |
| Himachal Pradesh | 1982        | 0.99<br>(0.91–1.08) |
| Himachal Pradesh | 1983        | 0.99<br>(0.91–1.08) |
| Himachal Pradesh | 1984        | 0.99<br>(0.91–1.07) |
| Himachal Pradesh | 1985        | 0.98<br>(0.9–1.06)  |
| Himachal Pradesh | 1986        | 0.97<br>(0.9–1.05)  |
| Himachal Pradesh | 1987        | 0.97<br>(0.9–1.05)  |
| Himachal Pradesh | 1988        | 0.97<br>(0.9–1.06)  |
| Himachal Pradesh | 1989        | 0.97<br>(0.9–1.05)  |
| Himachal Pradesh | 1990        | 0.97<br>(0.89–1.05) |
| Himachal Pradesh | 1991        | 0.97<br>(0.89–1.06) |
| Himachal Pradesh | 1992        | 0.97<br>(0.89–1.05) |
| Himachal Pradesh | 1993        | 0.96<br>(0.88–1.05) |
| Himachal Pradesh | 1994        | 0.96<br>(0.88–1.05) |
| Himachal Pradesh | 1995        | 0.96<br>(0.89–1.04) |
| Himachal Pradesh | 1996        | 0.96<br>(0.89–1.03) |
| Himachal Pradesh | 1997        | 0.96<br>(0.89–1.03) |
| Himachal Pradesh | 1998        | 0.96<br>(0.89–1.03) |

**Table 15 Ratio of adjusted to unadjusted 5q0 values for scaled locations by year**

| <b>Geography</b>  | <b>Year</b> | <b>Ratio</b>        |
|-------------------|-------------|---------------------|
| Himachal Pradesh  | 1999        | 0.96<br>(0.89–1.04) |
| Himachal Pradesh  | 2000        | 0.97<br>(0.9–1.05)  |
| Himachal Pradesh  | 2001        | 0.97<br>(0.89–1.05) |
| Himachal Pradesh  | 2002        | 0.96<br>(0.89–1.04) |
| Himachal Pradesh  | 2003        | 0.96<br>(0.9–1.03)  |
| Himachal Pradesh  | 2004        | 0.97<br>(0.9–1.04)  |
| Himachal Pradesh  | 2005        | 0.97<br>(0.9–1.04)  |
| Himachal Pradesh  | 2006        | 0.97<br>(0.89–1.05) |
| Himachal Pradesh  | 2007        | 0.97<br>(0.88–1.08) |
| Himachal Pradesh  | 2008        | 0.98<br>(0.89–1.09) |
| Himachal Pradesh  | 2009        | 0.99<br>(0.89–1.1)  |
| Himachal Pradesh  | 2010        | 1.0<br>(0.89–1.1)   |
| Himachal Pradesh  | 2011        | 1.01<br>(0.9–1.13)  |
| Himachal Pradesh  | 2012        | 1.04<br>(0.92–1.17) |
| Himachal Pradesh  | 2013        | 1.06<br>(0.93–1.21) |
| Himachal Pradesh  | 2014        | 1.05<br>(0.91–1.22) |
| Himachal Pradesh  | 2015        | 1.08<br>(0.92–1.29) |
| Himachal Pradesh  | 2016        | 1.08<br>(0.9–1.3)   |
| Himachal Pradesh  | 2017        | 1.08<br>(0.89–1.3)  |
| Jammu and Kashmir | 1950        | 0.88<br>(0.87–0.89) |
| Jammu and Kashmir | 1951        | 0.86<br>(0.82–0.91) |
| Jammu and Kashmir | 1952        | 0.86<br>(0.8–0.93)  |
| Jammu and Kashmir | 1953        | 0.86<br>(0.79–0.94) |
| Jammu and Kashmir | 1954        | 0.85<br>(0.78–0.93) |
| Jammu and Kashmir | 1955        | 0.85<br>(0.76–0.94) |
| Jammu and Kashmir | 1956        | 0.86<br>(0.75–0.97) |
| Jammu and Kashmir | 1957        | 0.88<br>(0.75–1.01) |
| Jammu and Kashmir | 1958        | 0.91<br>(0.77–1.05) |
| Jammu and Kashmir | 1959        | 0.92<br>(0.78–1.07) |
| Jammu and Kashmir | 1960        | 0.96<br>(0.81–1.12) |
| Jammu and Kashmir | 1961        | 0.97<br>(0.83–1.14) |

**Table 15 Ratio of adjusted to unadjusted 5q0 values for scaled locations by year**

| <b>Geography</b>  | <b>Year</b> | <b>Ratio</b>        |
|-------------------|-------------|---------------------|
| Jammu and Kashmir | 1962        | 0.97<br>(0.82–1.13) |
| Jammu and Kashmir | 1963        | 0.98<br>(0.84–1.13) |
| Jammu and Kashmir | 1964        | 0.99<br>(0.86–1.12) |
| Jammu and Kashmir | 1965        | 1.02<br>(0.91–1.14) |
| Jammu and Kashmir | 1966        | 1.03<br>(0.93–1.13) |
| Jammu and Kashmir | 1967        | 1.04<br>(0.94–1.15) |
| Jammu and Kashmir | 1968        | 1.03<br>(0.92–1.13) |
| Jammu and Kashmir | 1969        | 1.03<br>(0.92–1.14) |
| Jammu and Kashmir | 1970        | 1.02<br>(0.92–1.13) |
| Jammu and Kashmir | 1971        | 1.02<br>(0.92–1.13) |
| Jammu and Kashmir | 1972        | 1.02<br>(0.92–1.13) |
| Jammu and Kashmir | 1973        | 1.03<br>(0.94–1.12) |
| Jammu and Kashmir | 1974        | 1.03<br>(0.94–1.12) |
| Jammu and Kashmir | 1975        | 1.05<br>(0.95–1.14) |
| Jammu and Kashmir | 1976        | 1.05<br>(0.96–1.15) |
| Jammu and Kashmir | 1977        | 1.05<br>(0.96–1.14) |
| Jammu and Kashmir | 1978        | 1.04<br>(0.95–1.14) |
| Jammu and Kashmir | 1979        | 1.02<br>(0.94–1.12) |
| Jammu and Kashmir | 1980        | 1.01<br>(0.93–1.09) |
| Jammu and Kashmir | 1981        | 1.0<br>(0.92–1.09)  |
| Jammu and Kashmir | 1982        | 0.99<br>(0.92–1.08) |
| Jammu and Kashmir | 1983        | 0.99<br>(0.91–1.08) |
| Jammu and Kashmir | 1984        | 0.99<br>(0.91–1.07) |
| Jammu and Kashmir | 1985        | 0.98<br>(0.9–1.06)  |
| Jammu and Kashmir | 1986        | 0.97<br>(0.9–1.05)  |
| Jammu and Kashmir | 1987        | 0.97<br>(0.9–1.05)  |
| Jammu and Kashmir | 1988        | 0.97<br>(0.9–1.06)  |
| Jammu and Kashmir | 1989        | 0.97<br>(0.9–1.05)  |
| Jammu and Kashmir | 1990        | 0.97<br>(0.89–1.05) |
| Jammu and Kashmir | 1991        | 0.97<br>(0.89–1.06) |
| Jammu and Kashmir | 1992        | 0.97<br>(0.89–1.05) |

**Table 15 Ratio of adjusted to unadjusted 5q0 values for scaled locations by year**

| <b>Geography</b>  | <b>Year</b> | <b>Ratio</b>        |
|-------------------|-------------|---------------------|
| Jammu and Kashmir | 1993        | 0.96<br>(0.88–1.05) |
| Jammu and Kashmir | 1994        | 0.96<br>(0.88–1.05) |
| Jammu and Kashmir | 1995        | 0.96<br>(0.89–1.04) |
| Jammu and Kashmir | 1996        | 0.96<br>(0.89–1.03) |
| Jammu and Kashmir | 1997        | 0.96<br>(0.89–1.03) |
| Jammu and Kashmir | 1998        | 0.96<br>(0.89–1.03) |
| Jammu and Kashmir | 1999        | 0.96<br>(0.89–1.04) |
| Jammu and Kashmir | 2000        | 0.97<br>(0.9–1.05)  |
| Jammu and Kashmir | 2001        | 0.97<br>(0.89–1.05) |
| Jammu and Kashmir | 2002        | 0.96<br>(0.89–1.04) |
| Jammu and Kashmir | 2003        | 0.96<br>(0.9–1.03)  |
| Jammu and Kashmir | 2004        | 0.97<br>(0.9–1.04)  |
| Jammu and Kashmir | 2005        | 0.97<br>(0.9–1.04)  |
| Jammu and Kashmir | 2006        | 0.97<br>(0.89–1.05) |
| Jammu and Kashmir | 2007        | 0.97<br>(0.88–1.08) |
| Jammu and Kashmir | 2008        | 0.98<br>(0.89–1.09) |
| Jammu and Kashmir | 2009        | 0.99<br>(0.89–1.1)  |
| Jammu and Kashmir | 2010        | 1.0<br>(0.89–1.1)   |
| Jammu and Kashmir | 2011        | 1.01<br>(0.9–1.13)  |
| Jammu and Kashmir | 2012        | 1.04<br>(0.92–1.17) |
| Jammu and Kashmir | 2013        | 1.06<br>(0.93–1.21) |
| Jammu and Kashmir | 2014        | 1.05<br>(0.91–1.22) |
| Jammu and Kashmir | 2015        | 1.08<br>(0.92–1.29) |
| Jammu and Kashmir | 2016        | 1.08<br>(0.9–1.3)   |
| Jammu and Kashmir | 2017        | 1.08<br>(0.89–1.3)  |
| Jharkhand         | 1950        | 0.88<br>(0.87–0.89) |
| Jharkhand         | 1951        | 0.87<br>(0.83–0.91) |
| Jharkhand         | 1952        | 0.87<br>(0.8–0.93)  |
| Jharkhand         | 1953        | 0.87<br>(0.8–0.94)  |
| Jharkhand         | 1954        | 0.86<br>(0.78–0.93) |
| Jharkhand         | 1955        | 0.85<br>(0.77–0.94) |

**Table 15 Ratio of adjusted to unadjusted 5q0 values for scaled locations by year**

| <b>Geography</b> | <b>Year</b> | <b>Ratio</b>        |
|------------------|-------------|---------------------|
| Jharkhand        | 1956        | 0.86<br>(0.76–0.97) |
| Jharkhand        | 1957        | 0.89<br>(0.76–1.01) |
| Jharkhand        | 1958        | 0.91<br>(0.78–1.05) |
| Jharkhand        | 1959        | 0.92<br>(0.78–1.07) |
| Jharkhand        | 1960        | 0.96<br>(0.81–1.12) |
| Jharkhand        | 1961        | 0.98<br>(0.83–1.13) |
| Jharkhand        | 1962        | 0.98<br>(0.83–1.13) |
| Jharkhand        | 1963        | 0.98<br>(0.85–1.12) |
| Jharkhand        | 1964        | 0.99<br>(0.87–1.11) |
| Jharkhand        | 1965        | 1.02<br>(0.91–1.13) |
| Jharkhand        | 1966        | 1.03<br>(0.93–1.13) |
| Jharkhand        | 1967        | 1.04<br>(0.95–1.14) |
| Jharkhand        | 1968        | 1.03<br>(0.93–1.13) |
| Jharkhand        | 1969        | 1.02<br>(0.92–1.14) |
| Jharkhand        | 1970        | 1.02<br>(0.92–1.13) |
| Jharkhand        | 1971        | 1.02<br>(0.92–1.12) |
| Jharkhand        | 1972        | 1.02<br>(0.93–1.12) |
| Jharkhand        | 1973        | 1.03<br>(0.94–1.12) |
| Jharkhand        | 1974        | 1.03<br>(0.94–1.12) |
| Jharkhand        | 1975        | 1.04<br>(0.95–1.14) |
| Jharkhand        | 1976        | 1.05<br>(0.96–1.15) |
| Jharkhand        | 1977        | 1.04<br>(0.96–1.14) |
| Jharkhand        | 1978        | 1.04<br>(0.95–1.14) |
| Jharkhand        | 1979        | 1.02<br>(0.94–1.12) |
| Jharkhand        | 1980        | 1.01<br>(0.93–1.09) |
| Jharkhand        | 1981        | 1.0<br>(0.92–1.09)  |
| Jharkhand        | 1982        | 0.99<br>(0.92–1.08) |
| Jharkhand        | 1983        | 0.99<br>(0.91–1.07) |
| Jharkhand        | 1984        | 0.99<br>(0.91–1.07) |
| Jharkhand        | 1985        | 0.98<br>(0.9–1.06)  |
| Jharkhand        | 1986        | 0.97<br>(0.9–1.05)  |

**Table 15 Ratio of adjusted to unadjusted 5q0 values for scaled locations by year**

| <b>Geography</b> | <b>Year</b> | <b>Ratio</b>        |
|------------------|-------------|---------------------|
| Jharkhand        | 1987        | 0.97<br>(0.9–1.05)  |
| Jharkhand        | 1988        | 0.97<br>(0.9–1.05)  |
| Jharkhand        | 1989        | 0.97<br>(0.9–1.05)  |
| Jharkhand        | 1990        | 0.97<br>(0.9–1.05)  |
| Jharkhand        | 1991        | 0.97<br>(0.89–1.06) |
| Jharkhand        | 1992        | 0.97<br>(0.89–1.05) |
| Jharkhand        | 1993        | 0.96<br>(0.89–1.05) |
| Jharkhand        | 1994        | 0.96<br>(0.88–1.05) |
| Jharkhand        | 1995        | 0.97<br>(0.89–1.04) |
| Jharkhand        | 1996        | 0.96<br>(0.89–1.03) |
| Jharkhand        | 1997        | 0.96<br>(0.89–1.03) |
| Jharkhand        | 1998        | 0.96<br>(0.9–1.03)  |
| Jharkhand        | 1999        | 0.96<br>(0.89–1.04) |
| Jharkhand        | 2000        | 0.97<br>(0.9–1.05)  |
| Jharkhand        | 2001        | 0.97<br>(0.89–1.05) |
| Jharkhand        | 2002        | 0.96<br>(0.9–1.04)  |
| Jharkhand        | 2003        | 0.96<br>(0.9–1.03)  |
| Jharkhand        | 2004        | 0.97<br>(0.9–1.04)  |
| Jharkhand        | 2005        | 0.97<br>(0.9–1.04)  |
| Jharkhand        | 2006        | 0.97<br>(0.89–1.05) |
| Jharkhand        | 2007        | 0.97<br>(0.88–1.08) |
| Jharkhand        | 2008        | 0.98<br>(0.89–1.09) |
| Jharkhand        | 2009        | 0.99<br>(0.89–1.1)  |
| Jharkhand        | 2010        | 1.0<br>(0.89–1.1)   |
| Jharkhand        | 2011        | 1.01<br>(0.9–1.13)  |
| Jharkhand        | 2012        | 1.04<br>(0.92–1.16) |
| Jharkhand        | 2013        | 1.06<br>(0.93–1.21) |
| Jharkhand        | 2014        | 1.05<br>(0.92–1.22) |
| Jharkhand        | 2015        | 1.08<br>(0.92–1.28) |
| Jharkhand        | 2016        | 1.08<br>(0.9–1.29)  |
| Jharkhand        | 2017        | 1.08<br>(0.89–1.3)  |

**Table 15 Ratio of adjusted to unadjusted 5q0 values for scaled locations by year**

| <b>Geography</b> | <b>Year</b> | <b>Ratio</b>        |
|------------------|-------------|---------------------|
| Karnataka        | 1950        | 0.88<br>(0.88–0.89) |
| Karnataka        | 1951        | 0.87<br>(0.83–0.91) |
| Karnataka        | 1952        | 0.87<br>(0.81–0.93) |
| Karnataka        | 1953        | 0.87<br>(0.8–0.95)  |
| Karnataka        | 1954        | 0.86<br>(0.79–0.93) |
| Karnataka        | 1955        | 0.86<br>(0.77–0.94) |
| Karnataka        | 1956        | 0.87<br>(0.76–0.97) |
| Karnataka        | 1957        | 0.89<br>(0.76–1.01) |
| Karnataka        | 1958        | 0.91<br>(0.78–1.05) |
| Karnataka        | 1959        | 0.92<br>(0.79–1.07) |
| Karnataka        | 1960        | 0.96<br>(0.81–1.12) |
| Karnataka        | 1961        | 0.98<br>(0.83–1.13) |
| Karnataka        | 1962        | 0.98<br>(0.83–1.13) |
| Karnataka        | 1963        | 0.98<br>(0.85–1.12) |
| Karnataka        | 1964        | 0.99<br>(0.86–1.11) |
| Karnataka        | 1965        | 1.02<br>(0.91–1.13) |
| Karnataka        | 1966        | 1.03<br>(0.93–1.13) |
| Karnataka        | 1967        | 1.04<br>(0.94–1.14) |
| Karnataka        | 1968        | 1.03<br>(0.93–1.13) |
| Karnataka        | 1969        | 1.02<br>(0.92–1.13) |
| Karnataka        | 1970        | 1.02<br>(0.92–1.13) |
| Karnataka        | 1971        | 1.02<br>(0.92–1.13) |
| Karnataka        | 1972        | 1.02<br>(0.93–1.12) |
| Karnataka        | 1973        | 1.03<br>(0.94–1.12) |
| Karnataka        | 1974        | 1.03<br>(0.94–1.12) |
| Karnataka        | 1975        | 1.04<br>(0.95–1.14) |
| Karnataka        | 1976        | 1.05<br>(0.96–1.15) |
| Karnataka        | 1977        | 1.04<br>(0.96–1.14) |
| Karnataka        | 1978        | 1.04<br>(0.95–1.14) |
| Karnataka        | 1979        | 1.02<br>(0.94–1.12) |
| Karnataka        | 1980        | 1.01<br>(0.93–1.09) |

**Table 15 Ratio of adjusted to unadjusted 5q0 values for scaled locations by year**

| <b>Geography</b> | <b>Year</b> | <b>Ratio</b>        |
|------------------|-------------|---------------------|
| Karnataka        | 1981        | 1.0<br>(0.92–1.09)  |
| Karnataka        | 1982        | 0.99<br>(0.92–1.08) |
| Karnataka        | 1983        | 0.99<br>(0.91–1.08) |
| Karnataka        | 1984        | 0.99<br>(0.91–1.07) |
| Karnataka        | 1985        | 0.98<br>(0.9–1.06)  |
| Karnataka        | 1986        | 0.97<br>(0.9–1.05)  |
| Karnataka        | 1987        | 0.97<br>(0.9–1.05)  |
| Karnataka        | 1988        | 0.97<br>(0.9–1.06)  |
| Karnataka        | 1989        | 0.97<br>(0.9–1.05)  |
| Karnataka        | 1990        | 0.97<br>(0.89–1.05) |
| Karnataka        | 1991        | 0.97<br>(0.89–1.06) |
| Karnataka        | 1992        | 0.97<br>(0.89–1.05) |
| Karnataka        | 1993        | 0.96<br>(0.88–1.05) |
| Karnataka        | 1994        | 0.96<br>(0.88–1.05) |
| Karnataka        | 1995        | 0.96<br>(0.89–1.04) |
| Karnataka        | 1996        | 0.96<br>(0.89–1.03) |
| Karnataka        | 1997        | 0.96<br>(0.89–1.03) |
| Karnataka        | 1998        | 0.96<br>(0.89–1.03) |
| Karnataka        | 1999        | 0.96<br>(0.89–1.04) |
| Karnataka        | 2000        | 0.97<br>(0.9–1.05)  |
| Karnataka        | 2001        | 0.97<br>(0.89–1.05) |
| Karnataka        | 2002        | 0.96<br>(0.89–1.04) |
| Karnataka        | 2003        | 0.96<br>(0.9–1.03)  |
| Karnataka        | 2004        | 0.97<br>(0.9–1.04)  |
| Karnataka        | 2005        | 0.97<br>(0.9–1.04)  |
| Karnataka        | 2006        | 0.97<br>(0.89–1.05) |
| Karnataka        | 2007        | 0.97<br>(0.88–1.08) |
| Karnataka        | 2008        | 0.98<br>(0.89–1.09) |
| Karnataka        | 2009        | 0.99<br>(0.89–1.1)  |
| Karnataka        | 2010        | 1.0<br>(0.89–1.1)   |
| Karnataka        | 2011        | 1.01<br>(0.9–1.13)  |



**Table 15 Ratio of adjusted to unadjusted 5q0 values for scaled locations by year**

| <b>Geography</b> | <b>Year</b> | <b>Ratio</b>        |
|------------------|-------------|---------------------|
| Karnataka        | 2012        | 1.04<br>(0.92–1.17) |
| Karnataka        | 2013        | 1.06<br>(0.93–1.21) |
| Karnataka        | 2014        | 1.05<br>(0.91–1.22) |
| Karnataka        | 2015        | 1.08<br>(0.92–1.29) |
| Karnataka        | 2016        | 1.08<br>(0.9–1.3)   |
| Karnataka        | 2017        | 1.08<br>(0.89–1.3)  |
| Kerala           | 1950        | 0.88<br>(0.87–0.89) |
| Kerala           | 1951        | 0.87<br>(0.82–0.91) |
| Kerala           | 1952        | 0.86<br>(0.8–0.93)  |
| Kerala           | 1953        | 0.86<br>(0.79–0.94) |
| Kerala           | 1954        | 0.85<br>(0.78–0.93) |
| Kerala           | 1955        | 0.85<br>(0.76–0.94) |
| Kerala           | 1956        | 0.86<br>(0.75–0.97) |
| Kerala           | 1957        | 0.88<br>(0.75–1.01) |
| Kerala           | 1958        | 0.91<br>(0.77–1.05) |
| Kerala           | 1959        | 0.92<br>(0.78–1.07) |
| Kerala           | 1960        | 0.96<br>(0.8–1.12)  |
| Kerala           | 1961        | 0.97<br>(0.83–1.14) |
| Kerala           | 1962        | 0.97<br>(0.82–1.13) |
| Kerala           | 1963        | 0.98<br>(0.84–1.13) |
| Kerala           | 1964        | 0.99<br>(0.86–1.12) |
| Kerala           | 1965        | 1.02<br>(0.9–1.14)  |
| Kerala           | 1966        | 1.03<br>(0.93–1.13) |
| Kerala           | 1967        | 1.04<br>(0.94–1.15) |
| Kerala           | 1968        | 1.03<br>(0.92–1.14) |
| Kerala           | 1969        | 1.03<br>(0.92–1.14) |
| Kerala           | 1970        | 1.02<br>(0.91–1.14) |
| Kerala           | 1971        | 1.02<br>(0.92–1.13) |
| Kerala           | 1972        | 1.02<br>(0.92–1.13) |
| Kerala           | 1973        | 1.03<br>(0.93–1.12) |
| Kerala           | 1974        | 1.03<br>(0.94–1.13) |

**Table 15 Ratio of adjusted to unadjusted 5q0 values for scaled locations by year**

| <b>Geography</b> | <b>Year</b> | <b>Ratio</b>        |
|------------------|-------------|---------------------|
| Kerala           | 1975        | 1.05<br>(0.95–1.15) |
| Kerala           | 1976        | 1.05<br>(0.96–1.15) |
| Kerala           | 1977        | 1.05<br>(0.96–1.15) |
| Kerala           | 1978        | 1.04<br>(0.95–1.15) |
| Kerala           | 1979        | 1.02<br>(0.94–1.13) |
| Kerala           | 1980        | 1.01<br>(0.93–1.1)  |
| Kerala           | 1981        | 1.0<br>(0.92–1.09)  |
| Kerala           | 1982        | 0.99<br>(0.91–1.08) |
| Kerala           | 1983        | 0.99<br>(0.91–1.08) |
| Kerala           | 1984        | 0.99<br>(0.9–1.07)  |
| Kerala           | 1985        | 0.97<br>(0.89–1.06) |
| Kerala           | 1986        | 0.97<br>(0.89–1.05) |
| Kerala           | 1987        | 0.97<br>(0.9–1.05)  |
| Kerala           | 1988        | 0.97<br>(0.89–1.06) |
| Kerala           | 1989        | 0.97<br>(0.9–1.05)  |
| Kerala           | 1990        | 0.97<br>(0.89–1.05) |
| Kerala           | 1991        | 0.97<br>(0.88–1.06) |
| Kerala           | 1992        | 0.97<br>(0.88–1.05) |
| Kerala           | 1993        | 0.96<br>(0.88–1.05) |
| Kerala           | 1994        | 0.96<br>(0.88–1.05) |
| Kerala           | 1995        | 0.96<br>(0.89–1.04) |
| Kerala           | 1996        | 0.96<br>(0.88–1.03) |
| Kerala           | 1997        | 0.96<br>(0.89–1.03) |
| Kerala           | 1998        | 0.96<br>(0.89–1.03) |
| Kerala           | 1999        | 0.96<br>(0.89–1.04) |
| Kerala           | 2000        | 0.97<br>(0.89–1.05) |
| Kerala           | 2001        | 0.97<br>(0.89–1.05) |
| Kerala           | 2002        | 0.96<br>(0.89–1.04) |
| Kerala           | 2003        | 0.96<br>(0.89–1.03) |
| Kerala           | 2004        | 0.97<br>(0.9–1.04)  |
| Kerala           | 2005        | 0.97<br>(0.9–1.04)  |

**Table 15 Ratio of adjusted to unadjusted 5q0 values for scaled locations by year**

| <b>Geography</b> | <b>Year</b> | <b>Ratio</b>        |
|------------------|-------------|---------------------|
| Kerala           | 2006        | 0.97<br>(0.89–1.05) |
| Kerala           | 2007        | 0.97<br>(0.88–1.08) |
| Kerala           | 2008        | 0.98<br>(0.89–1.09) |
| Kerala           | 2009        | 0.98<br>(0.89–1.1)  |
| Kerala           | 2010        | 1.0<br>(0.89–1.11)  |
| Kerala           | 2011        | 1.01<br>(0.9–1.13)  |
| Kerala           | 2012        | 1.04<br>(0.92–1.17) |
| Kerala           | 2013        | 1.06<br>(0.93–1.22) |
| Kerala           | 2014        | 1.05<br>(0.91–1.22) |
| Kerala           | 2015        | 1.08<br>(0.92–1.29) |
| Kerala           | 2016        | 1.08<br>(0.9–1.3)   |
| Kerala           | 2017        | 1.08<br>(0.89–1.31) |
| Madhya Pradesh   | 1950        | 0.89<br>(0.88–0.9)  |
| Madhya Pradesh   | 1951        | 0.88<br>(0.84–0.91) |
| Madhya Pradesh   | 1952        | 0.87<br>(0.81–0.93) |
| Madhya Pradesh   | 1953        | 0.87<br>(0.81–0.95) |
| Madhya Pradesh   | 1954        | 0.86<br>(0.79–0.94) |
| Madhya Pradesh   | 1955        | 0.86<br>(0.78–0.94) |
| Madhya Pradesh   | 1956        | 0.87<br>(0.77–0.97) |
| Madhya Pradesh   | 1957        | 0.89<br>(0.77–1.01) |
| Madhya Pradesh   | 1958        | 0.92<br>(0.79–1.04) |
| Madhya Pradesh   | 1959        | 0.93<br>(0.79–1.07) |
| Madhya Pradesh   | 1960        | 0.96<br>(0.82–1.11) |
| Madhya Pradesh   | 1961        | 0.98<br>(0.84–1.13) |
| Madhya Pradesh   | 1962        | 0.98<br>(0.84–1.12) |
| Madhya Pradesh   | 1963        | 0.98<br>(0.85–1.12) |
| Madhya Pradesh   | 1964        | 0.99<br>(0.87–1.11) |
| Madhya Pradesh   | 1965        | 1.02<br>(0.91–1.13) |
| Madhya Pradesh   | 1966        | 1.03<br>(0.93–1.12) |
| Madhya Pradesh   | 1967        | 1.04<br>(0.95–1.14) |
| Madhya Pradesh   | 1968        | 1.02<br>(0.93–1.12) |

**Table 15 Ratio of adjusted to unadjusted 5q0 values for scaled locations by year**

| <b>Geography</b> | <b>Year</b> | <b>Ratio</b>        |
|------------------|-------------|---------------------|
| Madhya Pradesh   | 1969        | 1.02<br>(0.93–1.13) |
| Madhya Pradesh   | 1970        | 1.02<br>(0.92–1.13) |
| Madhya Pradesh   | 1971        | 1.02<br>(0.92–1.12) |
| Madhya Pradesh   | 1972        | 1.02<br>(0.93–1.12) |
| Madhya Pradesh   | 1973        | 1.02<br>(0.94–1.11) |
| Madhya Pradesh   | 1974        | 1.03<br>(0.94–1.12) |
| Madhya Pradesh   | 1975        | 1.04<br>(0.96–1.13) |
| Madhya Pradesh   | 1976        | 1.05<br>(0.97–1.14) |
| Madhya Pradesh   | 1977        | 1.04<br>(0.96–1.13) |
| Madhya Pradesh   | 1978        | 1.04<br>(0.96–1.13) |
| Madhya Pradesh   | 1979        | 1.02<br>(0.94–1.11) |
| Madhya Pradesh   | 1980        | 1.01<br>(0.93–1.09) |
| Madhya Pradesh   | 1981        | 1.0<br>(0.92–1.08)  |
| Madhya Pradesh   | 1982        | 0.99<br>(0.92–1.08) |
| Madhya Pradesh   | 1983        | 0.99<br>(0.92–1.07) |
| Madhya Pradesh   | 1984        | 0.99<br>(0.91–1.07) |
| Madhya Pradesh   | 1985        | 0.98<br>(0.9–1.06)  |
| Madhya Pradesh   | 1986        | 0.97<br>(0.9–1.05)  |
| Madhya Pradesh   | 1987        | 0.97<br>(0.9–1.05)  |
| Madhya Pradesh   | 1988        | 0.97<br>(0.9–1.05)  |
| Madhya Pradesh   | 1989        | 0.97<br>(0.9–1.05)  |
| Madhya Pradesh   | 1990        | 0.97<br>(0.9–1.05)  |
| Madhya Pradesh   | 1991        | 0.97<br>(0.89–1.05) |
| Madhya Pradesh   | 1992        | 0.97<br>(0.89–1.05) |
| Madhya Pradesh   | 1993        | 0.96<br>(0.89–1.05) |
| Madhya Pradesh   | 1994        | 0.96<br>(0.88–1.05) |
| Madhya Pradesh   | 1995        | 0.97<br>(0.89–1.04) |
| Madhya Pradesh   | 1996        | 0.96<br>(0.89–1.03) |
| Madhya Pradesh   | 1997        | 0.96<br>(0.9–1.03)  |
| Madhya Pradesh   | 1998        | 0.96<br>(0.9–1.03)  |
| Madhya Pradesh   | 1999        | 0.96<br>(0.89–1.04) |

**Table 15 Ratio of adjusted to unadjusted 5q0 values for scaled locations by year**

| <b>Geography</b> | <b>Year</b> | <b>Ratio</b>        |
|------------------|-------------|---------------------|
| Madhya Pradesh   | 2000        | 0.97<br>(0.9–1.05)  |
| Madhya Pradesh   | 2001        | 0.97<br>(0.9–1.04)  |
| Madhya Pradesh   | 2002        | 0.96<br>(0.9–1.04)  |
| Madhya Pradesh   | 2003        | 0.96<br>(0.9–1.03)  |
| Madhya Pradesh   | 2004        | 0.97<br>(0.9–1.04)  |
| Madhya Pradesh   | 2005        | 0.97<br>(0.91–1.04) |
| Madhya Pradesh   | 2006        | 0.97<br>(0.89–1.04) |
| Madhya Pradesh   | 2007        | 0.97<br>(0.88–1.07) |
| Madhya Pradesh   | 2008        | 0.98<br>(0.89–1.09) |
| Madhya Pradesh   | 2009        | 0.99<br>(0.89–1.09) |
| Madhya Pradesh   | 2010        | 1.0<br>(0.9–1.1)    |
| Madhya Pradesh   | 2011        | 1.01<br>(0.9–1.12)  |
| Madhya Pradesh   | 2012        | 1.04<br>(0.92–1.16) |
| Madhya Pradesh   | 2013        | 1.06<br>(0.93–1.21) |
| Madhya Pradesh   | 2014        | 1.05<br>(0.92–1.22) |
| Madhya Pradesh   | 2015        | 1.08<br>(0.92–1.28) |
| Madhya Pradesh   | 2016        | 1.08<br>(0.9–1.29)  |
| Madhya Pradesh   | 2017        | 1.08<br>(0.89–1.3)  |
| Maharashtra      | 1950        | 0.88<br>(0.88–0.89) |
| Maharashtra      | 1951        | 0.87<br>(0.83–0.91) |
| Maharashtra      | 1952        | 0.87<br>(0.81–0.93) |
| Maharashtra      | 1953        | 0.87<br>(0.8–0.95)  |
| Maharashtra      | 1954        | 0.86<br>(0.78–0.93) |
| Maharashtra      | 1955        | 0.85<br>(0.76–0.94) |
| Maharashtra      | 1956        | 0.86<br>(0.76–0.97) |
| Maharashtra      | 1957        | 0.89<br>(0.76–1.01) |
| Maharashtra      | 1958        | 0.91<br>(0.78–1.05) |
| Maharashtra      | 1959        | 0.92<br>(0.78–1.07) |
| Maharashtra      | 1960        | 0.96<br>(0.81–1.12) |
| Maharashtra      | 1961        | 0.98<br>(0.83–1.13) |
| Maharashtra      | 1962        | 0.98<br>(0.83–1.13) |

**Table 15 Ratio of adjusted to unadjusted 5q0 values for scaled locations by year**

| <b>Geography</b> | <b>Year</b> | <b>Ratio</b>        |
|------------------|-------------|---------------------|
| Maharashtra      | 1963        | 0.98<br>(0.85–1.12) |
| Maharashtra      | 1964        | 0.99<br>(0.86–1.11) |
| Maharashtra      | 1965        | 1.02<br>(0.91–1.13) |
| Maharashtra      | 1966        | 1.03<br>(0.93–1.13) |
| Maharashtra      | 1967        | 1.04<br>(0.94–1.14) |
| Maharashtra      | 1968        | 1.03<br>(0.92–1.13) |
| Maharashtra      | 1969        | 1.02<br>(0.92–1.14) |
| Maharashtra      | 1970        | 1.02<br>(0.92–1.13) |
| Maharashtra      | 1971        | 1.02<br>(0.92–1.13) |
| Maharashtra      | 1972        | 1.02<br>(0.93–1.12) |
| Maharashtra      | 1973        | 1.03<br>(0.94–1.12) |
| Maharashtra      | 1974        | 1.03<br>(0.94–1.12) |
| Maharashtra      | 1975        | 1.05<br>(0.95–1.14) |
| Maharashtra      | 1976        | 1.05<br>(0.96–1.15) |
| Maharashtra      | 1977        | 1.05<br>(0.96–1.14) |
| Maharashtra      | 1978        | 1.04<br>(0.95–1.14) |
| Maharashtra      | 1979        | 1.02<br>(0.94–1.12) |
| Maharashtra      | 1980        | 1.01<br>(0.93–1.09) |
| Maharashtra      | 1981        | 1.0<br>(0.92–1.09)  |
| Maharashtra      | 1982        | 0.99<br>(0.92–1.08) |
| Maharashtra      | 1983        | 0.99<br>(0.91–1.08) |
| Maharashtra      | 1984        | 0.99<br>(0.91–1.07) |
| Maharashtra      | 1985        | 0.98<br>(0.9–1.06)  |
| Maharashtra      | 1986        | 0.97<br>(0.9–1.05)  |
| Maharashtra      | 1987        | 0.97<br>(0.9–1.05)  |
| Maharashtra      | 1988        | 0.97<br>(0.9–1.06)  |
| Maharashtra      | 1989        | 0.97<br>(0.9–1.05)  |
| Maharashtra      | 1990        | 0.97<br>(0.89–1.05) |
| Maharashtra      | 1991        | 0.97<br>(0.89–1.06) |
| Maharashtra      | 1992        | 0.97<br>(0.89–1.05) |
| Maharashtra      | 1993        | 0.96<br>(0.88–1.05) |

**Table 15 Ratio of adjusted to unadjusted 5q0 values for scaled locations by year**

| <b>Geography</b> | <b>Year</b> | <b>Ratio</b>        |
|------------------|-------------|---------------------|
| Maharashtra      | 1994        | 0.96<br>(0.88–1.05) |
| Maharashtra      | 1995        | 0.96<br>(0.89–1.04) |
| Maharashtra      | 1996        | 0.96<br>(0.89–1.03) |
| Maharashtra      | 1997        | 0.96<br>(0.89–1.03) |
| Maharashtra      | 1998        | 0.96<br>(0.89–1.03) |
| Maharashtra      | 1999        | 0.96<br>(0.89–1.04) |
| Maharashtra      | 2000        | 0.97<br>(0.9–1.05)  |
| Maharashtra      | 2001        | 0.97<br>(0.89–1.05) |
| Maharashtra      | 2002        | 0.96<br>(0.89–1.04) |
| Maharashtra      | 2003        | 0.96<br>(0.9–1.03)  |
| Maharashtra      | 2004        | 0.97<br>(0.9–1.04)  |
| Maharashtra      | 2005        | 0.97<br>(0.9–1.04)  |
| Maharashtra      | 2006        | 0.97<br>(0.89–1.05) |
| Maharashtra      | 2007        | 0.97<br>(0.88–1.08) |
| Maharashtra      | 2008        | 0.98<br>(0.89–1.09) |
| Maharashtra      | 2009        | 0.99<br>(0.89–1.1)  |
| Maharashtra      | 2010        | 1.0<br>(0.89–1.1)   |
| Maharashtra      | 2011        | 1.01<br>(0.9–1.13)  |
| Maharashtra      | 2012        | 1.04<br>(0.92–1.17) |
| Maharashtra      | 2013        | 1.06<br>(0.93–1.21) |
| Maharashtra      | 2014        | 1.05<br>(0.91–1.22) |
| Maharashtra      | 2015        | 1.08<br>(0.92–1.29) |
| Maharashtra      | 2016        | 1.08<br>(0.9–1.3)   |
| Maharashtra      | 2017        | 1.08<br>(0.89–1.3)  |
| Manipur          | 1950        | 0.88<br>(0.87–0.89) |
| Manipur          | 1951        | 0.87<br>(0.82–0.91) |
| Manipur          | 1952        | 0.86<br>(0.8–0.93)  |
| Manipur          | 1953        | 0.86<br>(0.79–0.94) |
| Manipur          | 1954        | 0.85<br>(0.78–0.93) |
| Manipur          | 1955        | 0.85<br>(0.76–0.94) |
| Manipur          | 1956        | 0.86<br>(0.75–0.97) |

**Table 15 Ratio of adjusted to unadjusted 5q0 values for scaled locations by year**

| <b>Geography</b> | <b>Year</b> | <b>Ratio</b>        |
|------------------|-------------|---------------------|
| Manipur          | 1957        | 0.88<br>(0.76–1.01) |
| Manipur          | 1958        | 0.91<br>(0.77–1.05) |
| Manipur          | 1959        | 0.92<br>(0.78–1.07) |
| Manipur          | 1960        | 0.96<br>(0.81–1.12) |
| Manipur          | 1961        | 0.97<br>(0.83–1.14) |
| Manipur          | 1962        | 0.97<br>(0.83–1.13) |
| Manipur          | 1963        | 0.98<br>(0.84–1.13) |
| Manipur          | 1964        | 0.99<br>(0.86–1.12) |
| Manipur          | 1965        | 1.02<br>(0.91–1.14) |
| Manipur          | 1966        | 1.03<br>(0.93–1.13) |
| Manipur          | 1967        | 1.04<br>(0.94–1.15) |
| Manipur          | 1968        | 1.03<br>(0.92–1.13) |
| Manipur          | 1969        | 1.03<br>(0.92–1.14) |
| Manipur          | 1970        | 1.02<br>(0.92–1.14) |
| Manipur          | 1971        | 1.02<br>(0.92–1.13) |
| Manipur          | 1972        | 1.02<br>(0.92–1.13) |
| Manipur          | 1973        | 1.03<br>(0.94–1.12) |
| Manipur          | 1974        | 1.03<br>(0.94–1.13) |
| Manipur          | 1975        | 1.05<br>(0.95–1.14) |
| Manipur          | 1976        | 1.05<br>(0.96–1.15) |
| Manipur          | 1977        | 1.05<br>(0.96–1.14) |
| Manipur          | 1978        | 1.04<br>(0.95–1.14) |
| Manipur          | 1979        | 1.02<br>(0.94–1.12) |
| Manipur          | 1980        | 1.01<br>(0.93–1.09) |
| Manipur          | 1981        | 1.0<br>(0.92–1.09)  |
| Manipur          | 1982        | 0.99<br>(0.91–1.08) |
| Manipur          | 1983        | 0.99<br>(0.91–1.08) |
| Manipur          | 1984        | 0.99<br>(0.91–1.07) |
| Manipur          | 1985        | 0.98<br>(0.9–1.06)  |
| Manipur          | 1986        | 0.97<br>(0.9–1.05)  |
| Manipur          | 1987        | 0.97<br>(0.9–1.05)  |



**Table 15 Ratio of adjusted to unadjusted 5q0 values for scaled locations by year**

| <b>Geography</b> | <b>Year</b> | <b>Ratio</b>        |
|------------------|-------------|---------------------|
| Manipur          | 1988        | 0.97<br>(0.9–1.06)  |
| Manipur          | 1989        | 0.97<br>(0.9–1.05)  |
| Manipur          | 1990        | 0.97<br>(0.89–1.05) |
| Manipur          | 1991        | 0.97<br>(0.89–1.06) |
| Manipur          | 1992        | 0.97<br>(0.89–1.05) |
| Manipur          | 1993        | 0.96<br>(0.88–1.05) |
| Manipur          | 1994        | 0.96<br>(0.88–1.05) |
| Manipur          | 1995        | 0.96<br>(0.89–1.04) |
| Manipur          | 1996        | 0.96<br>(0.89–1.03) |
| Manipur          | 1997        | 0.96<br>(0.89–1.03) |
| Manipur          | 1998        | 0.96<br>(0.89–1.03) |
| Manipur          | 1999        | 0.96<br>(0.89–1.04) |
| Manipur          | 2000        | 0.97<br>(0.89–1.05) |
| Manipur          | 2001        | 0.97<br>(0.89–1.05) |
| Manipur          | 2002        | 0.96<br>(0.89–1.04) |
| Manipur          | 2003        | 0.96<br>(0.9–1.03)  |
| Manipur          | 2004        | 0.97<br>(0.9–1.04)  |
| Manipur          | 2005        | 0.97<br>(0.9–1.04)  |
| Manipur          | 2006        | 0.97<br>(0.89–1.05) |
| Manipur          | 2007        | 0.97<br>(0.88–1.08) |
| Manipur          | 2008        | 0.98<br>(0.89–1.09) |
| Manipur          | 2009        | 0.99<br>(0.89–1.1)  |
| Manipur          | 2010        | 1.0<br>(0.89–1.1)   |
| Manipur          | 2011        | 1.01<br>(0.9–1.13)  |
| Manipur          | 2012        | 1.04<br>(0.92–1.17) |
| Manipur          | 2013        | 1.06<br>(0.93–1.22) |
| Manipur          | 2014        | 1.05<br>(0.91–1.22) |
| Manipur          | 2015        | 1.08<br>(0.92–1.29) |
| Manipur          | 2016        | 1.08<br>(0.9–1.3)   |
| Manipur          | 2017        | 1.08<br>(0.89–1.3)  |
| Meghalaya        | 1950        | 0.88<br>(0.87–0.89) |

**Table 15 Ratio of adjusted to unadjusted 5q0 values for scaled locations by year**

| <b>Geography</b> | <b>Year</b> | <b>Ratio</b>        |
|------------------|-------------|---------------------|
| Meghalaya        | 1951        | 0.86<br>(0.82–0.9)  |
| Meghalaya        | 1952        | 0.86<br>(0.79–0.92) |
| Meghalaya        | 1953        | 0.86<br>(0.79–0.94) |
| Meghalaya        | 1954        | 0.85<br>(0.77–0.93) |
| Meghalaya        | 1955        | 0.85<br>(0.75–0.94) |
| Meghalaya        | 1956        | 0.86<br>(0.75–0.97) |
| Meghalaya        | 1957        | 0.88<br>(0.75–1.01) |
| Meghalaya        | 1958        | 0.91<br>(0.77–1.05) |
| Meghalaya        | 1959        | 0.92<br>(0.77–1.07) |
| Meghalaya        | 1960        | 0.96<br>(0.8–1.12)  |
| Meghalaya        | 1961        | 0.97<br>(0.83–1.14) |
| Meghalaya        | 1962        | 0.97<br>(0.82–1.13) |
| Meghalaya        | 1963        | 0.98<br>(0.84–1.13) |
| Meghalaya        | 1964        | 0.99<br>(0.86–1.12) |
| Meghalaya        | 1965        | 1.02<br>(0.9–1.14)  |
| Meghalaya        | 1966        | 1.03<br>(0.93–1.13) |
| Meghalaya        | 1967        | 1.04<br>(0.94–1.15) |
| Meghalaya        | 1968        | 1.03<br>(0.92–1.14) |
| Meghalaya        | 1969        | 1.03<br>(0.92–1.14) |
| Meghalaya        | 1970        | 1.02<br>(0.92–1.14) |
| Meghalaya        | 1971        | 1.02<br>(0.92–1.13) |
| Meghalaya        | 1972        | 1.02<br>(0.92–1.13) |
| Meghalaya        | 1973        | 1.03<br>(0.93–1.12) |
| Meghalaya        | 1974        | 1.03<br>(0.94–1.13) |
| Meghalaya        | 1975        | 1.05<br>(0.95–1.14) |
| Meghalaya        | 1976        | 1.05<br>(0.96–1.15) |
| Meghalaya        | 1977        | 1.05<br>(0.96–1.14) |
| Meghalaya        | 1978        | 1.04<br>(0.95–1.14) |
| Meghalaya        | 1979        | 1.02<br>(0.94–1.12) |
| Meghalaya        | 1980        | 1.01<br>(0.93–1.09) |
| Meghalaya        | 1981        | 1.0<br>(0.92–1.09)  |

**Table 15 Ratio of adjusted to unadjusted 5q0 values for scaled locations by year**

| <b>Geography</b> | <b>Year</b> | <b>Ratio</b>        |
|------------------|-------------|---------------------|
| Meghalaya        | 1982        | 0.99<br>(0.92–1.08) |
| Meghalaya        | 1983        | 0.99<br>(0.91–1.08) |
| Meghalaya        | 1984        | 0.99<br>(0.91–1.07) |
| Meghalaya        | 1985        | 0.98<br>(0.9–1.06)  |
| Meghalaya        | 1986        | 0.97<br>(0.9–1.05)  |
| Meghalaya        | 1987        | 0.97<br>(0.9–1.05)  |
| Meghalaya        | 1988        | 0.97<br>(0.9–1.05)  |
| Meghalaya        | 1989        | 0.97<br>(0.9–1.05)  |
| Meghalaya        | 1990        | 0.97<br>(0.89–1.05) |
| Meghalaya        | 1991        | 0.97<br>(0.89–1.06) |
| Meghalaya        | 1992        | 0.97<br>(0.89–1.05) |
| Meghalaya        | 1993        | 0.96<br>(0.88–1.05) |
| Meghalaya        | 1994        | 0.96<br>(0.88–1.05) |
| Meghalaya        | 1995        | 0.96<br>(0.89–1.04) |
| Meghalaya        | 1996        | 0.96<br>(0.89–1.03) |
| Meghalaya        | 1997        | 0.96<br>(0.89–1.03) |
| Meghalaya        | 1998        | 0.96<br>(0.89–1.03) |
| Meghalaya        | 1999        | 0.96<br>(0.89–1.04) |
| Meghalaya        | 2000        | 0.97<br>(0.9–1.05)  |
| Meghalaya        | 2001        | 0.97<br>(0.89–1.05) |
| Meghalaya        | 2002        | 0.96<br>(0.89–1.04) |
| Meghalaya        | 2003        | 0.96<br>(0.9–1.03)  |
| Meghalaya        | 2004        | 0.97<br>(0.9–1.04)  |
| Meghalaya        | 2005        | 0.97<br>(0.9–1.04)  |
| Meghalaya        | 2006        | 0.97<br>(0.89–1.05) |
| Meghalaya        | 2007        | 0.97<br>(0.88–1.08) |
| Meghalaya        | 2008        | 0.98<br>(0.89–1.09) |
| Meghalaya        | 2009        | 0.99<br>(0.89–1.1)  |
| Meghalaya        | 2010        | 1.0<br>(0.89–1.1)   |
| Meghalaya        | 2011        | 1.01<br>(0.9–1.13)  |
| Meghalaya        | 2012        | 1.04<br>(0.92–1.16) |

**Table 15 Ratio of adjusted to unadjusted 5q0 values for scaled locations by year**

| <b>Geography</b> | <b>Year</b> | <b>Ratio</b>        |
|------------------|-------------|---------------------|
| Meghalaya        | 2013        | 1.06<br>(0.93–1.21) |
| Meghalaya        | 2014        | 1.05<br>(0.92–1.22) |
| Meghalaya        | 2015        | 1.08<br>(0.92–1.28) |
| Meghalaya        | 2016        | 1.08<br>(0.9–1.29)  |
| Meghalaya        | 2017        | 1.08<br>(0.89–1.3)  |
| Mizoram          | 1950        | 0.87<br>(0.86–0.88) |
| Mizoram          | 1951        | 0.86<br>(0.81–0.9)  |
| Mizoram          | 1952        | 0.86<br>(0.79–0.92) |
| Mizoram          | 1953        | 0.86<br>(0.78–0.94) |
| Mizoram          | 1954        | 0.85<br>(0.77–0.93) |
| Mizoram          | 1955        | 0.84<br>(0.75–0.94) |
| Mizoram          | 1956        | 0.85<br>(0.74–0.97) |
| Mizoram          | 1957        | 0.88<br>(0.75–1.01) |
| Mizoram          | 1958        | 0.91<br>(0.76–1.05) |
| Mizoram          | 1959        | 0.92<br>(0.77–1.07) |
| Mizoram          | 1960        | 0.96<br>(0.8–1.13)  |
| Mizoram          | 1961        | 0.97<br>(0.82–1.14) |
| Mizoram          | 1962        | 0.97<br>(0.82–1.14) |
| Mizoram          | 1963        | 0.98<br>(0.84–1.13) |
| Mizoram          | 1964        | 0.99<br>(0.86–1.12) |
| Mizoram          | 1965        | 1.02<br>(0.9–1.14)  |
| Mizoram          | 1966        | 1.03<br>(0.93–1.14) |
| Mizoram          | 1967        | 1.05<br>(0.94–1.15) |
| Mizoram          | 1968        | 1.03<br>(0.92–1.14) |
| Mizoram          | 1969        | 1.03<br>(0.92–1.14) |
| Mizoram          | 1970        | 1.02<br>(0.91–1.14) |
| Mizoram          | 1971        | 1.02<br>(0.92–1.13) |
| Mizoram          | 1972        | 1.02<br>(0.92–1.13) |
| Mizoram          | 1973        | 1.03<br>(0.93–1.12) |
| Mizoram          | 1974        | 1.03<br>(0.94–1.13) |
| Mizoram          | 1975        | 1.05<br>(0.95–1.15) |

**Table 15 Ratio of adjusted to unadjusted 5q0 values for scaled locations by year**

| <b>Geography</b> | <b>Year</b> | <b>Ratio</b>        |
|------------------|-------------|---------------------|
| Mizoram          | 1976        | 1.05<br>(0.96–1.15) |
| Mizoram          | 1977        | 1.05<br>(0.96–1.15) |
| Mizoram          | 1978        | 1.04<br>(0.95–1.15) |
| Mizoram          | 1979        | 1.02<br>(0.94–1.13) |
| Mizoram          | 1980        | 1.01<br>(0.93–1.1)  |
| Mizoram          | 1981        | 1.0<br>(0.92–1.09)  |
| Mizoram          | 1982        | 0.99<br>(0.91–1.08) |
| Mizoram          | 1983        | 0.99<br>(0.91–1.08) |
| Mizoram          | 1984        | 0.99<br>(0.91–1.07) |
| Mizoram          | 1985        | 0.98<br>(0.9–1.06)  |
| Mizoram          | 1986        | 0.97<br>(0.89–1.05) |
| Mizoram          | 1987        | 0.97<br>(0.9–1.05)  |
| Mizoram          | 1988        | 0.97<br>(0.9–1.06)  |
| Mizoram          | 1989        | 0.97<br>(0.9–1.05)  |
| Mizoram          | 1990        | 0.97<br>(0.89–1.05) |
| Mizoram          | 1991        | 0.97<br>(0.89–1.06) |
| Mizoram          | 1992        | 0.97<br>(0.89–1.05) |
| Mizoram          | 1993        | 0.96<br>(0.88–1.05) |
| Mizoram          | 1994        | 0.96<br>(0.88–1.05) |
| Mizoram          | 1995        | 0.96<br>(0.89–1.04) |
| Mizoram          | 1996        | 0.96<br>(0.89–1.03) |
| Mizoram          | 1997        | 0.96<br>(0.89–1.03) |
| Mizoram          | 1998        | 0.96<br>(0.89–1.03) |
| Mizoram          | 1999        | 0.96<br>(0.89–1.04) |
| Mizoram          | 2000        | 0.97<br>(0.89–1.05) |
| Mizoram          | 2001        | 0.97<br>(0.89–1.05) |
| Mizoram          | 2002        | 0.96<br>(0.89–1.04) |
| Mizoram          | 2003        | 0.96<br>(0.9–1.03)  |
| Mizoram          | 2004        | 0.97<br>(0.9–1.04)  |
| Mizoram          | 2005        | 0.97<br>(0.9–1.04)  |
| Mizoram          | 2006        | 0.97<br>(0.89–1.05) |

**Table 15 Ratio of adjusted to unadjusted 5q0 values for scaled locations by year**

| <b>Geography</b> | <b>Year</b> | <b>Ratio</b>        |
|------------------|-------------|---------------------|
| Mizoram          | 2007        | 0.97<br>(0.88–1.08) |
| Mizoram          | 2008        | 0.98<br>(0.89–1.09) |
| Mizoram          | 2009        | 0.99<br>(0.89–1.1)  |
| Mizoram          | 2010        | 1.0<br>(0.89–1.1)   |
| Mizoram          | 2011        | 1.01<br>(0.9–1.13)  |
| Mizoram          | 2012        | 1.04<br>(0.92–1.17) |
| Mizoram          | 2013        | 1.06<br>(0.93–1.21) |
| Mizoram          | 2014        | 1.05<br>(0.92–1.22) |
| Mizoram          | 2015        | 1.08<br>(0.92–1.29) |
| Mizoram          | 2016        | 1.08<br>(0.9–1.3)   |
| Mizoram          | 2017        | 1.08<br>(0.89–1.3)  |
| Nagaland         | 1950        | 0.88<br>(0.87–0.89) |
| Nagaland         | 1951        | 0.87<br>(0.83–0.91) |
| Nagaland         | 1952        | 0.87<br>(0.8–0.93)  |
| Nagaland         | 1953        | 0.87<br>(0.8–0.94)  |
| Nagaland         | 1954        | 0.86<br>(0.78–0.93) |
| Nagaland         | 1955        | 0.85<br>(0.76–0.94) |
| Nagaland         | 1956        | 0.86<br>(0.76–0.97) |
| Nagaland         | 1957        | 0.89<br>(0.76–1.01) |
| Nagaland         | 1958        | 0.91<br>(0.78–1.05) |
| Nagaland         | 1959        | 0.92<br>(0.78–1.07) |
| Nagaland         | 1960        | 0.96<br>(0.81–1.12) |
| Nagaland         | 1961        | 0.98<br>(0.83–1.14) |
| Nagaland         | 1962        | 0.97<br>(0.83–1.13) |
| Nagaland         | 1963        | 0.98<br>(0.84–1.12) |
| Nagaland         | 1964        | 0.99<br>(0.86–1.12) |
| Nagaland         | 1965        | 1.02<br>(0.91–1.14) |
| Nagaland         | 1966        | 1.03<br>(0.93–1.13) |
| Nagaland         | 1967        | 1.04<br>(0.94–1.15) |
| Nagaland         | 1968        | 1.03<br>(0.92–1.13) |
| Nagaland         | 1969        | 1.03<br>(0.92–1.14) |

**Table 15 Ratio of adjusted to unadjusted 5q0 values for scaled locations by year**

| <b>Geography</b> | <b>Year</b> | <b>Ratio</b>        |
|------------------|-------------|---------------------|
| Nagaland         | 1970        | 1.02<br>(0.92–1.13) |
| Nagaland         | 1971        | 1.02<br>(0.92–1.13) |
| Nagaland         | 1972        | 1.02<br>(0.93–1.13) |
| Nagaland         | 1973        | 1.03<br>(0.94–1.12) |
| Nagaland         | 1974        | 1.03<br>(0.94–1.13) |
| Nagaland         | 1975        | 1.05<br>(0.95–1.14) |
| Nagaland         | 1976        | 1.05<br>(0.96–1.15) |
| Nagaland         | 1977        | 1.05<br>(0.96–1.14) |
| Nagaland         | 1978        | 1.04<br>(0.95–1.14) |
| Nagaland         | 1979        | 1.02<br>(0.94–1.12) |
| Nagaland         | 1980        | 1.01<br>(0.93–1.09) |
| Nagaland         | 1981        | 1.0<br>(0.92–1.09)  |
| Nagaland         | 1982        | 0.99<br>(0.91–1.08) |
| Nagaland         | 1983        | 0.99<br>(0.91–1.08) |
| Nagaland         | 1984        | 0.99<br>(0.91–1.07) |
| Nagaland         | 1985        | 0.98<br>(0.9–1.06)  |
| Nagaland         | 1986        | 0.97<br>(0.9–1.05)  |
| Nagaland         | 1987        | 0.97<br>(0.9–1.05)  |
| Nagaland         | 1988        | 0.97<br>(0.9–1.06)  |
| Nagaland         | 1989        | 0.97<br>(0.9–1.05)  |
| Nagaland         | 1990        | 0.97<br>(0.89–1.05) |
| Nagaland         | 1991        | 0.97<br>(0.89–1.06) |
| Nagaland         | 1992        | 0.97<br>(0.89–1.05) |
| Nagaland         | 1993        | 0.96<br>(0.88–1.05) |
| Nagaland         | 1994        | 0.96<br>(0.88–1.05) |
| Nagaland         | 1995        | 0.96<br>(0.89–1.04) |
| Nagaland         | 1996        | 0.96<br>(0.89–1.03) |
| Nagaland         | 1997        | 0.96<br>(0.89–1.03) |
| Nagaland         | 1998        | 0.96<br>(0.89–1.03) |
| Nagaland         | 1999        | 0.96<br>(0.89–1.04) |
| Nagaland         | 2000        | 0.97<br>(0.9–1.05)  |

**Table 15 Ratio of adjusted to unadjusted 5q0 values for scaled locations by year**

| <b>Geography</b> | <b>Year</b> | <b>Ratio</b>        |
|------------------|-------------|---------------------|
| Nagaland         | 2001        | 0.97<br>(0.89–1.05) |
| Nagaland         | 2002        | 0.96<br>(0.89–1.04) |
| Nagaland         | 2003        | 0.96<br>(0.9–1.03)  |
| Nagaland         | 2004        | 0.97<br>(0.9–1.04)  |
| Nagaland         | 2005        | 0.97<br>(0.9–1.04)  |
| Nagaland         | 2006        | 0.97<br>(0.89–1.05) |
| Nagaland         | 2007        | 0.97<br>(0.88–1.08) |
| Nagaland         | 2008        | 0.98<br>(0.89–1.09) |
| Nagaland         | 2009        | 0.99<br>(0.89–1.1)  |
| Nagaland         | 2010        | 1.0<br>(0.89–1.1)   |
| Nagaland         | 2011        | 1.01<br>(0.9–1.13)  |
| Nagaland         | 2012        | 1.04<br>(0.92–1.17) |
| Nagaland         | 2013        | 1.06<br>(0.93–1.21) |
| Nagaland         | 2014        | 1.05<br>(0.92–1.22) |
| Nagaland         | 2015        | 1.08<br>(0.92–1.29) |
| Nagaland         | 2016        | 1.08<br>(0.9–1.3)   |
| Nagaland         | 2017        | 1.08<br>(0.89–1.3)  |
| Odisha           | 1950        | 0.89<br>(0.88–0.9)  |
| Odisha           | 1951        | 0.88<br>(0.84–0.91) |
| Odisha           | 1952        | 0.87<br>(0.81–0.93) |
| Odisha           | 1953        | 0.88<br>(0.81–0.95) |
| Odisha           | 1954        | 0.87<br>(0.79–0.94) |
| Odisha           | 1955        | 0.86<br>(0.78–0.94) |
| Odisha           | 1956        | 0.87<br>(0.77–0.97) |
| Odisha           | 1957        | 0.89<br>(0.77–1.01) |
| Odisha           | 1958        | 0.92<br>(0.79–1.04) |
| Odisha           | 1959        | 0.93<br>(0.79–1.07) |
| Odisha           | 1960        | 0.96<br>(0.82–1.11) |
| Odisha           | 1961        | 0.98<br>(0.84–1.13) |
| Odisha           | 1962        | 0.98<br>(0.84–1.12) |
| Odisha           | 1963        | 0.98<br>(0.86–1.11) |



**Table 15 Ratio of adjusted to unadjusted 5q0 values for scaled locations by year**

| <b>Geography</b> | <b>Year</b> | <b>Ratio</b>        |
|------------------|-------------|---------------------|
| Odisha           | 1964        | 0.99<br>(0.87–1.11) |
| Odisha           | 1965        | 1.02<br>(0.91–1.13) |
| Odisha           | 1966        | 1.03<br>(0.93–1.12) |
| Odisha           | 1967        | 1.04<br>(0.95–1.13) |
| Odisha           | 1968        | 1.02<br>(0.93–1.12) |
| Odisha           | 1969        | 1.02<br>(0.93–1.13) |
| Odisha           | 1970        | 1.02<br>(0.92–1.13) |
| Odisha           | 1971        | 1.02<br>(0.92–1.12) |
| Odisha           | 1972        | 1.02<br>(0.93–1.12) |
| Odisha           | 1973        | 1.02<br>(0.94–1.11) |
| Odisha           | 1974        | 1.03<br>(0.94–1.12) |
| Odisha           | 1975        | 1.04<br>(0.96–1.13) |
| Odisha           | 1976        | 1.05<br>(0.96–1.14) |
| Odisha           | 1977        | 1.04<br>(0.96–1.14) |
| Odisha           | 1978        | 1.04<br>(0.95–1.14) |
| Odisha           | 1979        | 1.02<br>(0.94–1.12) |
| Odisha           | 1980        | 1.01<br>(0.93–1.09) |
| Odisha           | 1981        | 1.0<br>(0.92–1.08)  |
| Odisha           | 1982        | 0.99<br>(0.92–1.08) |
| Odisha           | 1983        | 0.99<br>(0.92–1.07) |
| Odisha           | 1984        | 0.99<br>(0.91–1.07) |
| Odisha           | 1985        | 0.98<br>(0.9–1.06)  |
| Odisha           | 1986        | 0.97<br>(0.9–1.05)  |
| Odisha           | 1987        | 0.97<br>(0.9–1.05)  |
| Odisha           | 1988        | 0.97<br>(0.9–1.05)  |
| Odisha           | 1989        | 0.97<br>(0.9–1.05)  |
| Odisha           | 1990        | 0.97<br>(0.9–1.05)  |
| Odisha           | 1991        | 0.97<br>(0.89–1.05) |
| Odisha           | 1992        | 0.97<br>(0.89–1.05) |
| Odisha           | 1993        | 0.96<br>(0.89–1.05) |
| Odisha           | 1994        | 0.96<br>(0.88–1.05) |

**Table 15 Ratio of adjusted to unadjusted 5q0 values for scaled locations by year**

| <b>Geography</b> | <b>Year</b> | <b>Ratio</b>        |
|------------------|-------------|---------------------|
| Odisha           | 1995        | 0.97<br>(0.89–1.04) |
| Odisha           | 1996        | 0.96<br>(0.89–1.03) |
| Odisha           | 1997        | 0.96<br>(0.9–1.03)  |
| Odisha           | 1998        | 0.96<br>(0.9–1.03)  |
| Odisha           | 1999        | 0.96<br>(0.89–1.04) |
| Odisha           | 2000        | 0.97<br>(0.9–1.05)  |
| Odisha           | 2001        | 0.97<br>(0.9–1.05)  |
| Odisha           | 2002        | 0.96<br>(0.9–1.04)  |
| Odisha           | 2003        | 0.96<br>(0.9–1.03)  |
| Odisha           | 2004        | 0.97<br>(0.9–1.04)  |
| Odisha           | 2005        | 0.97<br>(0.9–1.04)  |
| Odisha           | 2006        | 0.97<br>(0.89–1.04) |
| Odisha           | 2007        | 0.97<br>(0.88–1.07) |
| Odisha           | 2008        | 0.98<br>(0.89–1.09) |
| Odisha           | 2009        | 0.99<br>(0.89–1.09) |
| Odisha           | 2010        | 1.0<br>(0.89–1.1)   |
| Odisha           | 2011        | 1.01<br>(0.9–1.12)  |
| Odisha           | 2012        | 1.04<br>(0.92–1.16) |
| Odisha           | 2013        | 1.06<br>(0.93–1.21) |
| Odisha           | 2014        | 1.05<br>(0.92–1.22) |
| Odisha           | 2015        | 1.08<br>(0.92–1.28) |
| Odisha           | 2016        | 1.08<br>(0.9–1.29)  |
| Odisha           | 2017        | 1.08<br>(0.89–1.3)  |
| Punjab           | 1950        | 0.88<br>(0.87–0.89) |
| Punjab           | 1951        | 0.86<br>(0.82–0.91) |
| Punjab           | 1952        | 0.86<br>(0.8–0.93)  |
| Punjab           | 1953        | 0.86<br>(0.79–0.94) |
| Punjab           | 1954        | 0.85<br>(0.77–0.93) |
| Punjab           | 1955        | 0.85<br>(0.76–0.94) |
| Punjab           | 1956        | 0.86<br>(0.75–0.97) |
| Punjab           | 1957        | 0.88<br>(0.75–1.01) |

**Table 15 Ratio of adjusted to unadjusted 5q0 values for scaled locations by year**

| <b>Geography</b> | <b>Year</b> | <b>Ratio</b>        |
|------------------|-------------|---------------------|
| Punjab           | 1958        | 0.91<br>(0.77–1.05) |
| Punjab           | 1959        | 0.92<br>(0.77–1.07) |
| Punjab           | 1960        | 0.96<br>(0.8–1.12)  |
| Punjab           | 1961        | 0.97<br>(0.83–1.14) |
| Punjab           | 1962        | 0.97<br>(0.82–1.13) |
| Punjab           | 1963        | 0.98<br>(0.84–1.13) |
| Punjab           | 1964        | 0.99<br>(0.86–1.12) |
| Punjab           | 1965        | 1.02<br>(0.9–1.14)  |
| Punjab           | 1966        | 1.03<br>(0.93–1.13) |
| Punjab           | 1967        | 1.04<br>(0.94–1.15) |
| Punjab           | 1968        | 1.03<br>(0.92–1.14) |
| Punjab           | 1969        | 1.03<br>(0.92–1.14) |
| Punjab           | 1970        | 1.02<br>(0.92–1.14) |
| Punjab           | 1971        | 1.02<br>(0.92–1.13) |
| Punjab           | 1972        | 1.02<br>(0.92–1.13) |
| Punjab           | 1973        | 1.03<br>(0.93–1.12) |
| Punjab           | 1974        | 1.03<br>(0.94–1.13) |
| Punjab           | 1975        | 1.05<br>(0.95–1.14) |
| Punjab           | 1976        | 1.05<br>(0.96–1.15) |
| Punjab           | 1977        | 1.05<br>(0.96–1.15) |
| Punjab           | 1978        | 1.04<br>(0.95–1.14) |
| Punjab           | 1979        | 1.02<br>(0.94–1.12) |
| Punjab           | 1980        | 1.01<br>(0.93–1.09) |
| Punjab           | 1981        | 1.0<br>(0.92–1.09)  |
| Punjab           | 1982        | 0.99<br>(0.91–1.08) |
| Punjab           | 1983        | 0.99<br>(0.91–1.08) |
| Punjab           | 1984        | 0.99<br>(0.91–1.07) |
| Punjab           | 1985        | 0.98<br>(0.9–1.06)  |
| Punjab           | 1986        | 0.97<br>(0.9–1.05)  |
| Punjab           | 1987        | 0.97<br>(0.9–1.05)  |
| Punjab           | 1988        | 0.97<br>(0.9–1.06)  |

**Table 15 Ratio of adjusted to unadjusted 5q0 values for scaled locations by year**

| <b>Geography</b> | <b>Year</b> | <b>Ratio</b>        |
|------------------|-------------|---------------------|
| Punjab           | 1989        | 0.97<br>(0.9–1.05)  |
| Punjab           | 1990        | 0.97<br>(0.89–1.05) |
| Punjab           | 1991        | 0.97<br>(0.89–1.06) |
| Punjab           | 1992        | 0.97<br>(0.89–1.05) |
| Punjab           | 1993        | 0.96<br>(0.88–1.05) |
| Punjab           | 1994        | 0.96<br>(0.88–1.05) |
| Punjab           | 1995        | 0.96<br>(0.89–1.04) |
| Punjab           | 1996        | 0.96<br>(0.89–1.03) |
| Punjab           | 1997        | 0.96<br>(0.89–1.03) |
| Punjab           | 1998        | 0.96<br>(0.89–1.03) |
| Punjab           | 1999        | 0.96<br>(0.89–1.04) |
| Punjab           | 2000        | 0.97<br>(0.9–1.05)  |
| Punjab           | 2001        | 0.97<br>(0.89–1.05) |
| Punjab           | 2002        | 0.96<br>(0.89–1.04) |
| Punjab           | 2003        | 0.96<br>(0.9–1.03)  |
| Punjab           | 2004        | 0.97<br>(0.9–1.04)  |
| Punjab           | 2005        | 0.97<br>(0.9–1.04)  |
| Punjab           | 2006        | 0.97<br>(0.89–1.05) |
| Punjab           | 2007        | 0.97<br>(0.88–1.08) |
| Punjab           | 2008        | 0.98<br>(0.89–1.09) |
| Punjab           | 2009        | 0.99<br>(0.89–1.1)  |
| Punjab           | 2010        | 1.0<br>(0.89–1.1)   |
| Punjab           | 2011        | 1.01<br>(0.9–1.13)  |
| Punjab           | 2012        | 1.04<br>(0.92–1.17) |
| Punjab           | 2013        | 1.06<br>(0.93–1.21) |
| Punjab           | 2014        | 1.05<br>(0.91–1.22) |
| Punjab           | 2015        | 1.08<br>(0.92–1.29) |
| Punjab           | 2016        | 1.08<br>(0.9–1.3)   |
| Punjab           | 2017        | 1.08<br>(0.89–1.3)  |
| Rajasthan        | 1950        | 0.89<br>(0.88–0.89) |
| Rajasthan        | 1951        | 0.87<br>(0.83–0.91) |

**Table 15 Ratio of adjusted to unadjusted 5q0 values for scaled locations by year**

| <b>Geography</b> | <b>Year</b> | <b>Ratio</b>        |
|------------------|-------------|---------------------|
| Rajasthan        | 1952        | 0.87<br>(0.81–0.93) |
| Rajasthan        | 1953        | 0.87<br>(0.8–0.95)  |
| Rajasthan        | 1954        | 0.86<br>(0.79–0.94) |
| Rajasthan        | 1955        | 0.86<br>(0.77–0.94) |
| Rajasthan        | 1956        | 0.87<br>(0.77–0.97) |
| Rajasthan        | 1957        | 0.89<br>(0.77–1.01) |
| Rajasthan        | 1958        | 0.91<br>(0.79–1.05) |
| Rajasthan        | 1959        | 0.92<br>(0.79–1.07) |
| Rajasthan        | 1960        | 0.96<br>(0.82–1.11) |
| Rajasthan        | 1961        | 0.98<br>(0.84–1.13) |
| Rajasthan        | 1962        | 0.98<br>(0.83–1.12) |
| Rajasthan        | 1963        | 0.98<br>(0.85–1.12) |
| Rajasthan        | 1964        | 0.99<br>(0.87–1.11) |
| Rajasthan        | 1965        | 1.02<br>(0.91–1.13) |
| Rajasthan        | 1966        | 1.03<br>(0.93–1.12) |
| Rajasthan        | 1967        | 1.04<br>(0.95–1.14) |
| Rajasthan        | 1968        | 1.02<br>(0.93–1.13) |
| Rajasthan        | 1969        | 1.02<br>(0.93–1.13) |
| Rajasthan        | 1970        | 1.02<br>(0.92–1.13) |
| Rajasthan        | 1971        | 1.02<br>(0.92–1.12) |
| Rajasthan        | 1972        | 1.02<br>(0.93–1.12) |
| Rajasthan        | 1973        | 1.03<br>(0.94–1.12) |
| Rajasthan        | 1974        | 1.03<br>(0.94–1.12) |
| Rajasthan        | 1975        | 1.04<br>(0.96–1.14) |
| Rajasthan        | 1976        | 1.05<br>(0.96–1.14) |
| Rajasthan        | 1977        | 1.04<br>(0.96–1.14) |
| Rajasthan        | 1978        | 1.04<br>(0.95–1.14) |
| Rajasthan        | 1979        | 1.02<br>(0.94–1.12) |
| Rajasthan        | 1980        | 1.01<br>(0.93–1.09) |
| Rajasthan        | 1981        | 1.0<br>(0.92–1.08)  |
| Rajasthan        | 1982        | 0.99<br>(0.92–1.08) |

**Table 15 Ratio of adjusted to unadjusted 5q0 values for scaled locations by year**

| <b>Geography</b> | <b>Year</b> | <b>Ratio</b>        |
|------------------|-------------|---------------------|
| Rajasthan        | 1983        | 0.99<br>(0.91–1.07) |
| Rajasthan        | 1984        | 0.99<br>(0.91–1.07) |
| Rajasthan        | 1985        | 0.98<br>(0.9–1.06)  |
| Rajasthan        | 1986        | 0.97<br>(0.9–1.05)  |
| Rajasthan        | 1987        | 0.97<br>(0.9–1.05)  |
| Rajasthan        | 1988        | 0.97<br>(0.9–1.05)  |
| Rajasthan        | 1989        | 0.97<br>(0.9–1.05)  |
| Rajasthan        | 1990        | 0.97<br>(0.9–1.05)  |
| Rajasthan        | 1991        | 0.97<br>(0.89–1.05) |
| Rajasthan        | 1992        | 0.97<br>(0.89–1.05) |
| Rajasthan        | 1993        | 0.96<br>(0.89–1.05) |
| Rajasthan        | 1994        | 0.96<br>(0.88–1.05) |
| Rajasthan        | 1995        | 0.97<br>(0.89–1.04) |
| Rajasthan        | 1996        | 0.96<br>(0.89–1.03) |
| Rajasthan        | 1997        | 0.96<br>(0.89–1.03) |
| Rajasthan        | 1998        | 0.96<br>(0.9–1.03)  |
| Rajasthan        | 1999        | 0.96<br>(0.89–1.04) |
| Rajasthan        | 2000        | 0.97<br>(0.9–1.05)  |
| Rajasthan        | 2001        | 0.97<br>(0.9–1.05)  |
| Rajasthan        | 2002        | 0.96<br>(0.9–1.04)  |
| Rajasthan        | 2003        | 0.96<br>(0.9–1.03)  |
| Rajasthan        | 2004        | 0.97<br>(0.9–1.04)  |
| Rajasthan        | 2005        | 0.97<br>(0.91–1.04) |
| Rajasthan        | 2006        | 0.97<br>(0.89–1.04) |
| Rajasthan        | 2007        | 0.97<br>(0.88–1.07) |
| Rajasthan        | 2008        | 0.98<br>(0.89–1.09) |
| Rajasthan        | 2009        | 0.99<br>(0.89–1.1)  |
| Rajasthan        | 2010        | 1.0<br>(0.89–1.1)   |
| Rajasthan        | 2011        | 1.01<br>(0.9–1.12)  |
| Rajasthan        | 2012        | 1.04<br>(0.92–1.16) |
| Rajasthan        | 2013        | 1.06<br>(0.93–1.21) |

**Table 15 Ratio of adjusted to unadjusted 5q0 values for scaled locations by year**

| <b>Geography</b> | <b>Year</b> | <b>Ratio</b>        |
|------------------|-------------|---------------------|
| Rajasthan        | 2014        | 1.05<br>(0.92–1.22) |
| Rajasthan        | 2015        | 1.08<br>(0.92–1.28) |
| Rajasthan        | 2016        | 1.08<br>(0.9–1.29)  |
| Rajasthan        | 2017        | 1.08<br>(0.89–1.3)  |
| Sikkim           | 1950        | 0.88<br>(0.87–0.89) |
| Sikkim           | 1951        | 0.87<br>(0.82–0.91) |
| Sikkim           | 1952        | 0.86<br>(0.8–0.93)  |
| Sikkim           | 1953        | 0.87<br>(0.79–0.94) |
| Sikkim           | 1954        | 0.85<br>(0.78–0.93) |
| Sikkim           | 1955        | 0.85<br>(0.76–0.94) |
| Sikkim           | 1956        | 0.86<br>(0.75–0.97) |
| Sikkim           | 1957        | 0.89<br>(0.76–1.01) |
| Sikkim           | 1958        | 0.91<br>(0.77–1.05) |
| Sikkim           | 1959        | 0.92<br>(0.78–1.07) |
| Sikkim           | 1960        | 0.96<br>(0.81–1.12) |
| Sikkim           | 1961        | 0.97<br>(0.83–1.14) |
| Sikkim           | 1962        | 0.97<br>(0.83–1.13) |
| Sikkim           | 1963        | 0.98<br>(0.84–1.12) |
| Sikkim           | 1964        | 0.99<br>(0.86–1.12) |
| Sikkim           | 1965        | 1.02<br>(0.91–1.14) |
| Sikkim           | 1966        | 1.03<br>(0.93–1.13) |
| Sikkim           | 1967        | 1.04<br>(0.94–1.15) |
| Sikkim           | 1968        | 1.03<br>(0.92–1.13) |
| Sikkim           | 1969        | 1.03<br>(0.92–1.14) |
| Sikkim           | 1970        | 1.02<br>(0.92–1.13) |
| Sikkim           | 1971        | 1.02<br>(0.92–1.13) |
| Sikkim           | 1972        | 1.02<br>(0.93–1.12) |
| Sikkim           | 1973        | 1.03<br>(0.94–1.12) |
| Sikkim           | 1974        | 1.03<br>(0.94–1.12) |
| Sikkim           | 1975        | 1.05<br>(0.95–1.14) |
| Sikkim           | 1976        | 1.05<br>(0.96–1.15) |

**Table 15 Ratio of adjusted to unadjusted 5q0 values for scaled locations by year**

| <b>Geography</b> | <b>Year</b> | <b>Ratio</b>        |
|------------------|-------------|---------------------|
| Sikkim           | 1977        | 1.05<br>(0.96–1.14) |
| Sikkim           | 1978        | 1.04<br>(0.95–1.14) |
| Sikkim           | 1979        | 1.02<br>(0.94–1.12) |
| Sikkim           | 1980        | 1.01<br>(0.93–1.09) |
| Sikkim           | 1981        | 1.0<br>(0.92–1.09)  |
| Sikkim           | 1982        | 0.99<br>(0.91–1.08) |
| Sikkim           | 1983        | 0.99<br>(0.91–1.08) |
| Sikkim           | 1984        | 0.99<br>(0.91–1.07) |
| Sikkim           | 1985        | 0.98<br>(0.9–1.06)  |
| Sikkim           | 1986        | 0.97<br>(0.9–1.05)  |
| Sikkim           | 1987        | 0.97<br>(0.9–1.05)  |
| Sikkim           | 1988        | 0.97<br>(0.9–1.06)  |
| Sikkim           | 1989        | 0.97<br>(0.9–1.05)  |
| Sikkim           | 1990        | 0.97<br>(0.89–1.05) |
| Sikkim           | 1991        | 0.97<br>(0.89–1.06) |
| Sikkim           | 1992        | 0.97<br>(0.89–1.05) |
| Sikkim           | 1993        | 0.96<br>(0.88–1.05) |
| Sikkim           | 1994        | 0.96<br>(0.88–1.05) |
| Sikkim           | 1995        | 0.96<br>(0.89–1.04) |
| Sikkim           | 1996        | 0.96<br>(0.89–1.03) |
| Sikkim           | 1997        | 0.96<br>(0.89–1.03) |
| Sikkim           | 1998        | 0.96<br>(0.89–1.03) |
| Sikkim           | 1999        | 0.96<br>(0.89–1.04) |
| Sikkim           | 2000        | 0.97<br>(0.9–1.05)  |
| Sikkim           | 2001        | 0.97<br>(0.89–1.05) |
| Sikkim           | 2002        | 0.96<br>(0.89–1.04) |
| Sikkim           | 2003        | 0.96<br>(0.9–1.03)  |
| Sikkim           | 2004        | 0.97<br>(0.9–1.04)  |
| Sikkim           | 2005        | 0.97<br>(0.9–1.04)  |
| Sikkim           | 2006        | 0.97<br>(0.89–1.05) |
| Sikkim           | 2007        | 0.97<br>(0.88–1.08) |



**Table 15 Ratio of adjusted to unadjusted 5q0 values for scaled locations by year**

| <b>Geography</b> | <b>Year</b> | <b>Ratio</b>        |
|------------------|-------------|---------------------|
| Sikkim           | 2008        | 0.98<br>(0.89–1.09) |
| Sikkim           | 2009        | 0.99<br>(0.89–1.1)  |
| Sikkim           | 2010        | 1.0<br>(0.89–1.1)   |
| Sikkim           | 2011        | 1.01<br>(0.9–1.13)  |
| Sikkim           | 2012        | 1.04<br>(0.92–1.17) |
| Sikkim           | 2013        | 1.06<br>(0.93–1.22) |
| Sikkim           | 2014        | 1.05<br>(0.91–1.22) |
| Sikkim           | 2015        | 1.08<br>(0.92–1.29) |
| Sikkim           | 2016        | 1.08<br>(0.9–1.3)   |
| Sikkim           | 2017        | 1.08<br>(0.89–1.3)  |
| Tamil Nadu       | 1950        | 0.89<br>(0.88–0.89) |
| Tamil Nadu       | 1951        | 0.87<br>(0.83–0.91) |
| Tamil Nadu       | 1952        | 0.87<br>(0.81–0.93) |
| Tamil Nadu       | 1953        | 0.87<br>(0.8–0.95)  |
| Tamil Nadu       | 1954        | 0.86<br>(0.78–0.94) |
| Tamil Nadu       | 1955        | 0.86<br>(0.77–0.94) |
| Tamil Nadu       | 1956        | 0.87<br>(0.76–0.97) |
| Tamil Nadu       | 1957        | 0.89<br>(0.77–1.01) |
| Tamil Nadu       | 1958        | 0.91<br>(0.78–1.05) |
| Tamil Nadu       | 1959        | 0.92<br>(0.79–1.07) |
| Tamil Nadu       | 1960        | 0.96<br>(0.81–1.12) |
| Tamil Nadu       | 1961        | 0.98<br>(0.84–1.13) |
| Tamil Nadu       | 1962        | 0.98<br>(0.83–1.13) |
| Tamil Nadu       | 1963        | 0.98<br>(0.85–1.12) |
| Tamil Nadu       | 1964        | 0.99<br>(0.87–1.11) |
| Tamil Nadu       | 1965        | 1.02<br>(0.91–1.13) |
| Tamil Nadu       | 1966        | 1.03<br>(0.93–1.13) |
| Tamil Nadu       | 1967        | 1.04<br>(0.95–1.14) |
| Tamil Nadu       | 1968        | 1.03<br>(0.93–1.13) |
| Tamil Nadu       | 1969        | 1.02<br>(0.93–1.13) |
| Tamil Nadu       | 1970        | 1.02<br>(0.92–1.13) |

**Table 15 Ratio of adjusted to unadjusted 5q0 values for scaled locations by year**

| <b>Geography</b> | <b>Year</b> | <b>Ratio</b>        |
|------------------|-------------|---------------------|
| Tamil Nadu       | 1971        | 1.02<br>(0.92–1.12) |
| Tamil Nadu       | 1972        | 1.02<br>(0.93–1.12) |
| Tamil Nadu       | 1973        | 1.03<br>(0.94–1.12) |
| Tamil Nadu       | 1974        | 1.03<br>(0.94–1.12) |
| Tamil Nadu       | 1975        | 1.04<br>(0.95–1.14) |
| Tamil Nadu       | 1976        | 1.05<br>(0.96–1.15) |
| Tamil Nadu       | 1977        | 1.04<br>(0.96–1.14) |
| Tamil Nadu       | 1978        | 1.04<br>(0.95–1.14) |
| Tamil Nadu       | 1979        | 1.02<br>(0.94–1.12) |
| Tamil Nadu       | 1980        | 1.01<br>(0.93–1.09) |
| Tamil Nadu       | 1981        | 1.0<br>(0.92–1.09)  |
| Tamil Nadu       | 1982        | 0.99<br>(0.92–1.08) |
| Tamil Nadu       | 1983        | 0.99<br>(0.91–1.08) |
| Tamil Nadu       | 1984        | 0.99<br>(0.91–1.07) |
| Tamil Nadu       | 1985        | 0.98<br>(0.9–1.06)  |
| Tamil Nadu       | 1986        | 0.97<br>(0.9–1.05)  |
| Tamil Nadu       | 1987        | 0.97<br>(0.9–1.05)  |
| Tamil Nadu       | 1988        | 0.97<br>(0.9–1.06)  |
| Tamil Nadu       | 1989        | 0.97<br>(0.9–1.05)  |
| Tamil Nadu       | 1990        | 0.97<br>(0.89–1.05) |
| Tamil Nadu       | 1991        | 0.97<br>(0.89–1.06) |
| Tamil Nadu       | 1992        | 0.97<br>(0.89–1.05) |
| Tamil Nadu       | 1993        | 0.96<br>(0.88–1.05) |
| Tamil Nadu       | 1994        | 0.96<br>(0.88–1.05) |
| Tamil Nadu       | 1995        | 0.96<br>(0.89–1.04) |
| Tamil Nadu       | 1996        | 0.96<br>(0.89–1.03) |
| Tamil Nadu       | 1997        | 0.96<br>(0.89–1.03) |
| Tamil Nadu       | 1998        | 0.96<br>(0.89–1.03) |
| Tamil Nadu       | 1999        | 0.96<br>(0.89–1.04) |
| Tamil Nadu       | 2000        | 0.97<br>(0.9–1.05)  |
| Tamil Nadu       | 2001        | 0.97<br>(0.89–1.05) |

**Table 15 Ratio of adjusted to unadjusted 5q0 values for scaled locations by year**

| <b>Geography</b> | <b>Year</b> | <b>Ratio</b>        |
|------------------|-------------|---------------------|
| Tamil Nadu       | 2002        | 0.96<br>(0.89–1.04) |
| Tamil Nadu       | 2003        | 0.96<br>(0.9–1.03)  |
| Tamil Nadu       | 2004        | 0.97<br>(0.9–1.04)  |
| Tamil Nadu       | 2005        | 0.97<br>(0.9–1.04)  |
| Tamil Nadu       | 2006        | 0.97<br>(0.89–1.05) |
| Tamil Nadu       | 2007        | 0.97<br>(0.88–1.08) |
| Tamil Nadu       | 2008        | 0.98<br>(0.89–1.09) |
| Tamil Nadu       | 2009        | 0.98<br>(0.89–1.1)  |
| Tamil Nadu       | 2010        | 1.0<br>(0.89–1.1)   |
| Tamil Nadu       | 2011        | 1.01<br>(0.9–1.13)  |
| Tamil Nadu       | 2012        | 1.04<br>(0.92–1.17) |
| Tamil Nadu       | 2013        | 1.06<br>(0.93–1.22) |
| Tamil Nadu       | 2014        | 1.05<br>(0.91–1.22) |
| Tamil Nadu       | 2015        | 1.08<br>(0.92–1.29) |
| Tamil Nadu       | 2016        | 1.08<br>(0.9–1.3)   |
| Tamil Nadu       | 2017        | 1.08<br>(0.89–1.3)  |
| Telangana        | 1950        | 1.19<br>(1.17–1.22) |
| Telangana        | 1951        | 1.18<br>(1.1–1.26)  |
| Telangana        | 1952        | 1.17<br>(1.04–1.3)  |
| Telangana        | 1953        | 1.17<br>(0.99–1.37) |
| Telangana        | 1954        | 1.16<br>(0.93–1.4)  |
| Telangana        | 1955        | 1.15<br>(0.91–1.43) |
| Telangana        | 1956        | 1.17<br>(0.89–1.5)  |
| Telangana        | 1957        | 1.2<br>(0.89–1.56)  |
| Telangana        | 1958        | 1.24<br>(0.89–1.63) |
| Telangana        | 1959        | 1.25<br>(0.89–1.68) |
| Telangana        | 1960        | 1.31<br>(0.92–1.73) |
| Telangana        | 1961        | 1.32<br>(0.95–1.77) |
| Telangana        | 1962        | 1.32<br>(0.94–1.77) |
| Telangana        | 1963        | 1.34<br>(0.96–1.8)  |
| Telangana        | 1964        | 1.34<br>(0.98–1.78) |

**Table 15 Ratio of adjusted to unadjusted 5q0 values for scaled locations by year**

| <b>Geography</b> | <b>Year</b> | <b>Ratio</b>        |
|------------------|-------------|---------------------|
| Telangana        | 1965        | 1.38<br>(1.01–1.81) |
| Telangana        | 1966        | 1.39<br>(1.02–1.8)  |
| Telangana        | 1967        | 1.41<br>(1.05–1.8)  |
| Telangana        | 1968        | 1.4<br>(1.07–1.76)  |
| Telangana        | 1969        | 1.41<br>(1.1–1.75)  |
| Telangana        | 1970        | 1.41<br>(1.11–1.73) |
| Telangana        | 1971        | 1.42<br>(1.14–1.74) |
| Telangana        | 1972        | 1.43<br>(1.15–1.75) |
| Telangana        | 1973        | 1.45<br>(1.16–1.78) |
| Telangana        | 1974        | 1.45<br>(1.17–1.77) |
| Telangana        | 1975        | 1.46<br>(1.17–1.77) |
| Telangana        | 1976        | 1.44<br>(1.18–1.76) |
| Telangana        | 1977        | 1.42<br>(1.18–1.71) |
| Telangana        | 1978        | 1.4<br>(1.17–1.68)  |
| Telangana        | 1979        | 1.36<br>(1.15–1.63) |
| Telangana        | 1980        | 1.31<br>(1.1–1.56)  |
| Telangana        | 1981        | 1.28<br>(1.09–1.51) |
| Telangana        | 1982        | 1.26<br>(1.07–1.49) |
| Telangana        | 1983        | 1.24<br>(1.06–1.46) |
| Telangana        | 1984        | 1.22<br>(1.04–1.43) |
| Telangana        | 1985        | 1.2<br>(1.03–1.4)   |
| Telangana        | 1986        | 1.19<br>(1.01–1.39) |
| Telangana        | 1987        | 1.19<br>(1.02–1.38) |
| Telangana        | 1988        | 1.19<br>(1.04–1.36) |
| Telangana        | 1989        | 1.19<br>(1.05–1.35) |
| Telangana        | 1990        | 1.2<br>(1.06–1.35)  |
| Telangana        | 1991        | 1.2<br>(1.05–1.37)  |
| Telangana        | 1992        | 1.21<br>(1.05–1.39) |
| Telangana        | 1993        | 1.2<br>(1.04–1.4)   |
| Telangana        | 1994        | 1.2<br>(1.03–1.4)   |
| Telangana        | 1995        | 1.21<br>(1.04–1.42) |

**Table 15 Ratio of adjusted to unadjusted 5q0 values for scaled locations by year**

| <b>Geography</b> | <b>Year</b> | <b>Ratio</b>        |
|------------------|-------------|---------------------|
| Telangana        | 1996        | 1.21<br>(1.03–1.4)  |
| Telangana        | 1997        | 1.21<br>(1.04–1.4)  |
| Telangana        | 1998        | 1.21<br>(1.06–1.37) |
| Telangana        | 1999        | 1.2<br>(1.07–1.34)  |
| Telangana        | 2000        | 1.2<br>(1.1–1.32)   |
| Telangana        | 2001        | 1.19<br>(1.09–1.31) |
| Telangana        | 2002        | 1.18<br>(1.07–1.31) |
| Telangana        | 2003        | 1.18<br>(1.04–1.32) |
| Telangana        | 2004        | 1.17<br>(1.01–1.34) |
| Telangana        | 2005        | 1.17<br>(1.0–1.36)  |
| Telangana        | 2006        | 1.16<br>(0.96–1.38) |
| Telangana        | 2007        | 1.16<br>(0.94–1.41) |
| Telangana        | 2008        | 1.17<br>(0.94–1.45) |
| Telangana        | 2009        | 1.17<br>(0.93–1.48) |
| Telangana        | 2010        | 1.19<br>(0.93–1.51) |
| Telangana        | 2011        | 1.2<br>(0.93–1.52)  |
| Telangana        | 2012        | 1.19<br>(0.91–1.55) |
| Telangana        | 2013        | 1.21<br>(0.9–1.59)  |
| Telangana        | 2014        | 1.21<br>(0.88–1.64) |
| Telangana        | 2015        | 1.24<br>(0.88–1.77) |
| Telangana        | 2016        | 1.24<br>(0.84–1.79) |
| Telangana        | 2017        | 1.24<br>(0.82–1.84) |
| Tripura          | 1950        | 0.89<br>(0.88–0.9)  |
| Tripura          | 1951        | 0.88<br>(0.84–0.91) |
| Tripura          | 1952        | 0.87<br>(0.81–0.93) |
| Tripura          | 1953        | 0.87<br>(0.81–0.95) |
| Tripura          | 1954        | 0.86<br>(0.79–0.94) |
| Tripura          | 1955        | 0.86<br>(0.77–0.94) |
| Tripura          | 1956        | 0.87<br>(0.77–0.97) |
| Tripura          | 1957        | 0.89<br>(0.77–1.01) |
| Tripura          | 1958        | 0.92<br>(0.79–1.05) |

**Table 15 Ratio of adjusted to unadjusted 5q0 values for scaled locations by year**

| <b>Geography</b> | <b>Year</b> | <b>Ratio</b>        |
|------------------|-------------|---------------------|
| Tripura          | 1959        | 0.92<br>(0.79–1.07) |
| Tripura          | 1960        | 0.96<br>(0.82–1.12) |
| Tripura          | 1961        | 0.98<br>(0.84–1.13) |
| Tripura          | 1962        | 0.98<br>(0.83–1.12) |
| Tripura          | 1963        | 0.98<br>(0.85–1.12) |
| Tripura          | 1964        | 0.99<br>(0.87–1.11) |
| Tripura          | 1965        | 1.02<br>(0.91–1.13) |
| Tripura          | 1966        | 1.03<br>(0.93–1.12) |
| Tripura          | 1967        | 1.04<br>(0.95–1.14) |
| Tripura          | 1968        | 1.03<br>(0.93–1.13) |
| Tripura          | 1969        | 1.02<br>(0.93–1.13) |
| Tripura          | 1970        | 1.02<br>(0.92–1.13) |
| Tripura          | 1971        | 1.02<br>(0.92–1.13) |
| Tripura          | 1972        | 1.02<br>(0.93–1.12) |
| Tripura          | 1973        | 1.03<br>(0.94–1.12) |
| Tripura          | 1974        | 1.03<br>(0.94–1.12) |
| Tripura          | 1975        | 1.04<br>(0.95–1.14) |
| Tripura          | 1976        | 1.05<br>(0.96–1.15) |
| Tripura          | 1977        | 1.04<br>(0.96–1.14) |
| Tripura          | 1978        | 1.04<br>(0.95–1.14) |
| Tripura          | 1979        | 1.02<br>(0.94–1.12) |
| Tripura          | 1980        | 1.01<br>(0.93–1.09) |
| Tripura          | 1981        | 1.0<br>(0.92–1.09)  |
| Tripura          | 1982        | 0.99<br>(0.92–1.08) |
| Tripura          | 1983        | 0.99<br>(0.91–1.08) |
| Tripura          | 1984        | 0.99<br>(0.91–1.07) |
| Tripura          | 1985        | 0.98<br>(0.9–1.06)  |
| Tripura          | 1986        | 0.97<br>(0.9–1.05)  |
| Tripura          | 1987        | 0.97<br>(0.9–1.05)  |
| Tripura          | 1988        | 0.97<br>(0.9–1.05)  |
| Tripura          | 1989        | 0.97<br>(0.9–1.05)  |

**Table 15 Ratio of adjusted to unadjusted 5q0 values for scaled locations by year**

| <b>Geography</b> | <b>Year</b> | <b>Ratio</b>        |
|------------------|-------------|---------------------|
| Tripura          | 1990        | 0.97<br>(0.89–1.05) |
| Tripura          | 1991        | 0.97<br>(0.89–1.06) |
| Tripura          | 1992        | 0.97<br>(0.89–1.05) |
| Tripura          | 1993        | 0.96<br>(0.89–1.05) |
| Tripura          | 1994        | 0.96<br>(0.88–1.05) |
| Tripura          | 1995        | 0.96<br>(0.89–1.04) |
| Tripura          | 1996        | 0.96<br>(0.89–1.03) |
| Tripura          | 1997        | 0.96<br>(0.89–1.03) |
| Tripura          | 1998        | 0.96<br>(0.89–1.03) |
| Tripura          | 1999        | 0.96<br>(0.89–1.04) |
| Tripura          | 2000        | 0.97<br>(0.9–1.05)  |
| Tripura          | 2001        | 0.97<br>(0.89–1.05) |
| Tripura          | 2002        | 0.96<br>(0.89–1.04) |
| Tripura          | 2003        | 0.96<br>(0.9–1.03)  |
| Tripura          | 2004        | 0.97<br>(0.9–1.04)  |
| Tripura          | 2005        | 0.97<br>(0.9–1.04)  |
| Tripura          | 2006        | 0.97<br>(0.89–1.05) |
| Tripura          | 2007        | 0.97<br>(0.88–1.08) |
| Tripura          | 2008        | 0.98<br>(0.89–1.09) |
| Tripura          | 2009        | 0.99<br>(0.89–1.1)  |
| Tripura          | 2010        | 1.0<br>(0.89–1.1)   |
| Tripura          | 2011        | 1.01<br>(0.9–1.13)  |
| Tripura          | 2012        | 1.04<br>(0.92–1.17) |
| Tripura          | 2013        | 1.06<br>(0.93–1.21) |
| Tripura          | 2014        | 1.05<br>(0.91–1.22) |
| Tripura          | 2015        | 1.08<br>(0.92–1.29) |
| Tripura          | 2016        | 1.08<br>(0.9–1.3)   |
| Tripura          | 2017        | 1.08<br>(0.89–1.3)  |
| Uttar Pradesh    | 1950        | 0.9<br>(0.89–0.9)   |
| Uttar Pradesh    | 1951        | 0.88<br>(0.85–0.92) |
| Uttar Pradesh    | 1952        | 0.88<br>(0.82–0.94) |

**Table 15 Ratio of adjusted to unadjusted 5q0 values for scaled locations by year**

| <b>Geography</b> | <b>Year</b> | <b>Ratio</b>        |
|------------------|-------------|---------------------|
| Uttar Pradesh    | 1953        | 0.88<br>(0.82–0.95) |
| Uttar Pradesh    | 1954        | 0.87<br>(0.8–0.94)  |
| Uttar Pradesh    | 1955        | 0.87<br>(0.78–0.95) |
| Uttar Pradesh    | 1956        | 0.88<br>(0.78–0.97) |
| Uttar Pradesh    | 1957        | 0.9<br>(0.78–1.01)  |
| Uttar Pradesh    | 1958        | 0.92<br>(0.8–1.04)  |
| Uttar Pradesh    | 1959        | 0.93<br>(0.8–1.06)  |
| Uttar Pradesh    | 1960        | 0.97<br>(0.83–1.11) |
| Uttar Pradesh    | 1961        | 0.98<br>(0.85–1.12) |
| Uttar Pradesh    | 1962        | 0.98<br>(0.85–1.11) |
| Uttar Pradesh    | 1963        | 0.99<br>(0.86–1.11) |
| Uttar Pradesh    | 1964        | 0.99<br>(0.88–1.1)  |
| Uttar Pradesh    | 1965        | 1.02<br>(0.92–1.12) |
| Uttar Pradesh    | 1966        | 1.03<br>(0.94–1.11) |
| Uttar Pradesh    | 1967        | 1.04<br>(0.95–1.13) |
| Uttar Pradesh    | 1968        | 1.02<br>(0.93–1.12) |
| Uttar Pradesh    | 1969        | 1.02<br>(0.93–1.12) |
| Uttar Pradesh    | 1970        | 1.02<br>(0.92–1.12) |
| Uttar Pradesh    | 1971        | 1.02<br>(0.93–1.12) |
| Uttar Pradesh    | 1972        | 1.02<br>(0.93–1.11) |
| Uttar Pradesh    | 1973        | 1.02<br>(0.94–1.11) |
| Uttar Pradesh    | 1974        | 1.03<br>(0.95–1.11) |
| Uttar Pradesh    | 1975        | 1.04<br>(0.96–1.13) |
| Uttar Pradesh    | 1976        | 1.04<br>(0.97–1.14) |
| Uttar Pradesh    | 1977        | 1.04<br>(0.96–1.13) |
| Uttar Pradesh    | 1978        | 1.04<br>(0.96–1.13) |
| Uttar Pradesh    | 1979        | 1.02<br>(0.94–1.11) |
| Uttar Pradesh    | 1980        | 1.01<br>(0.93–1.09) |
| Uttar Pradesh    | 1981        | 1.0<br>(0.93–1.08)  |
| Uttar Pradesh    | 1982        | 0.99<br>(0.92–1.07) |
| Uttar Pradesh    | 1983        | 0.99<br>(0.92–1.07) |



**Table 15 Ratio of adjusted to unadjusted 5q0 values for scaled locations by year**

| <b>Geography</b> | <b>Year</b> | <b>Ratio</b>        |
|------------------|-------------|---------------------|
| Uttar Pradesh    | 1984        | 0.99<br>(0.91–1.07) |
| Uttar Pradesh    | 1985        | 0.98<br>(0.9–1.06)  |
| Uttar Pradesh    | 1986        | 0.97<br>(0.9–1.05)  |
| Uttar Pradesh    | 1987        | 0.97<br>(0.9–1.05)  |
| Uttar Pradesh    | 1988        | 0.97<br>(0.9–1.05)  |
| Uttar Pradesh    | 1989        | 0.97<br>(0.9–1.05)  |
| Uttar Pradesh    | 1990        | 0.97<br>(0.9–1.05)  |
| Uttar Pradesh    | 1991        | 0.97<br>(0.89–1.05) |
| Uttar Pradesh    | 1992        | 0.97<br>(0.89–1.05) |
| Uttar Pradesh    | 1993        | 0.96<br>(0.89–1.05) |
| Uttar Pradesh    | 1994        | 0.96<br>(0.88–1.05) |
| Uttar Pradesh    | 1995        | 0.97<br>(0.89–1.04) |
| Uttar Pradesh    | 1996        | 0.96<br>(0.89–1.03) |
| Uttar Pradesh    | 1997        | 0.96<br>(0.9–1.03)  |
| Uttar Pradesh    | 1998        | 0.96<br>(0.9–1.03)  |
| Uttar Pradesh    | 1999        | 0.96<br>(0.89–1.04) |
| Uttar Pradesh    | 2000        | 0.97<br>(0.9–1.05)  |
| Uttar Pradesh    | 2001        | 0.97<br>(0.9–1.04)  |
| Uttar Pradesh    | 2002        | 0.96<br>(0.9–1.04)  |
| Uttar Pradesh    | 2003        | 0.96<br>(0.9–1.03)  |
| Uttar Pradesh    | 2004        | 0.97<br>(0.9–1.04)  |
| Uttar Pradesh    | 2005        | 0.97<br>(0.91–1.04) |
| Uttar Pradesh    | 2006        | 0.97<br>(0.89–1.04) |
| Uttar Pradesh    | 2007        | 0.97<br>(0.88–1.07) |
| Uttar Pradesh    | 2008        | 0.98<br>(0.89–1.09) |
| Uttar Pradesh    | 2009        | 0.99<br>(0.89–1.09) |
| Uttar Pradesh    | 2010        | 1.0<br>(0.9–1.1)    |
| Uttar Pradesh    | 2011        | 1.01<br>(0.9–1.12)  |
| Uttar Pradesh    | 2012        | 1.04<br>(0.92–1.16) |
| Uttar Pradesh    | 2013        | 1.06<br>(0.93–1.21) |
| Uttar Pradesh    | 2014        | 1.05<br>(0.92–1.21) |

**Table 15 Ratio of adjusted to unadjusted 5q0 values for scaled locations by year**

| <b>Geography</b> | <b>Year</b> | <b>Ratio</b>        |
|------------------|-------------|---------------------|
| Uttar Pradesh    | 2015        | 1.07<br>(0.92–1.28) |
| Uttar Pradesh    | 2016        | 1.08<br>(0.9–1.29)  |
| Uttar Pradesh    | 2017        | 1.08<br>(0.89–1.3)  |
| Uttarakhand      | 1950        | 0.88<br>(0.87–0.89) |
| Uttarakhand      | 1951        | 0.86<br>(0.82–0.91) |
| Uttarakhand      | 1952        | 0.86<br>(0.8–0.93)  |
| Uttarakhand      | 1953        | 0.86<br>(0.79–0.94) |
| Uttarakhand      | 1954        | 0.85<br>(0.77–0.93) |
| Uttarakhand      | 1955        | 0.85<br>(0.76–0.94) |
| Uttarakhand      | 1956        | 0.86<br>(0.75–0.97) |
| Uttarakhand      | 1957        | 0.88<br>(0.75–1.01) |
| Uttarakhand      | 1958        | 0.91<br>(0.77–1.05) |
| Uttarakhand      | 1959        | 0.92<br>(0.78–1.07) |
| Uttarakhand      | 1960        | 0.96<br>(0.8–1.12)  |
| Uttarakhand      | 1961        | 0.97<br>(0.83–1.14) |
| Uttarakhand      | 1962        | 0.97<br>(0.82–1.13) |
| Uttarakhand      | 1963        | 0.98<br>(0.84–1.13) |
| Uttarakhand      | 1964        | 0.99<br>(0.86–1.12) |
| Uttarakhand      | 1965        | 1.02<br>(0.91–1.14) |
| Uttarakhand      | 1966        | 1.03<br>(0.93–1.13) |
| Uttarakhand      | 1967        | 1.04<br>(0.94–1.15) |
| Uttarakhand      | 1968        | 1.03<br>(0.92–1.13) |
| Uttarakhand      | 1969        | 1.03<br>(0.92–1.14) |
| Uttarakhand      | 1970        | 1.02<br>(0.92–1.14) |
| Uttarakhand      | 1971        | 1.02<br>(0.92–1.13) |
| Uttarakhand      | 1972        | 1.02<br>(0.92–1.13) |
| Uttarakhand      | 1973        | 1.03<br>(0.93–1.12) |
| Uttarakhand      | 1974        | 1.03<br>(0.94–1.13) |
| Uttarakhand      | 1975        | 1.05<br>(0.95–1.14) |
| Uttarakhand      | 1976        | 1.05<br>(0.96–1.15) |
| Uttarakhand      | 1977        | 1.05<br>(0.96–1.14) |

**Table 15 Ratio of adjusted to unadjusted 5q0 values for scaled locations by year**

| <b>Geography</b> | <b>Year</b> | <b>Ratio</b>        |
|------------------|-------------|---------------------|
| Uttarakhand      | 1978        | 1.04<br>(0.95–1.14) |
| Uttarakhand      | 1979        | 1.02<br>(0.94–1.12) |
| Uttarakhand      | 1980        | 1.01<br>(0.93–1.09) |
| Uttarakhand      | 1981        | 1.0<br>(0.92–1.09)  |
| Uttarakhand      | 1982        | 0.99<br>(0.91–1.08) |
| Uttarakhand      | 1983        | 0.99<br>(0.91–1.08) |
| Uttarakhand      | 1984        | 0.99<br>(0.91–1.07) |
| Uttarakhand      | 1985        | 0.98<br>(0.9–1.06)  |
| Uttarakhand      | 1986        | 0.97<br>(0.9–1.05)  |
| Uttarakhand      | 1987        | 0.97<br>(0.9–1.05)  |
| Uttarakhand      | 1988        | 0.97<br>(0.9–1.06)  |
| Uttarakhand      | 1989        | 0.97<br>(0.9–1.05)  |
| Uttarakhand      | 1990        | 0.97<br>(0.89–1.05) |
| Uttarakhand      | 1991        | 0.97<br>(0.89–1.06) |
| Uttarakhand      | 1992        | 0.97<br>(0.89–1.05) |
| Uttarakhand      | 1993        | 0.96<br>(0.88–1.05) |
| Uttarakhand      | 1994        | 0.96<br>(0.88–1.05) |
| Uttarakhand      | 1995        | 0.96<br>(0.89–1.04) |
| Uttarakhand      | 1996        | 0.96<br>(0.89–1.03) |
| Uttarakhand      | 1997        | 0.96<br>(0.89–1.03) |
| Uttarakhand      | 1998        | 0.96<br>(0.89–1.03) |
| Uttarakhand      | 1999        | 0.96<br>(0.89–1.04) |
| Uttarakhand      | 2000        | 0.97<br>(0.9–1.05)  |
| Uttarakhand      | 2001        | 0.97<br>(0.89–1.05) |
| Uttarakhand      | 2002        | 0.96<br>(0.89–1.04) |
| Uttarakhand      | 2003        | 0.96<br>(0.9–1.03)  |
| Uttarakhand      | 2004        | 0.97<br>(0.9–1.04)  |
| Uttarakhand      | 2005        | 0.97<br>(0.9–1.04)  |
| Uttarakhand      | 2006        | 0.97<br>(0.89–1.05) |
| Uttarakhand      | 2007        | 0.97<br>(0.88–1.08) |
| Uttarakhand      | 2008        | 0.98<br>(0.89–1.09) |

**Table 15 Ratio of adjusted to unadjusted 5q0 values for scaled locations by year**

| <b>Geography</b> | <b>Year</b> | <b>Ratio</b>        |
|------------------|-------------|---------------------|
| Uttarakhand      | 2009        | 0.99<br>(0.89–1.1)  |
| Uttarakhand      | 2010        | 1.0<br>(0.89–1.1)   |
| Uttarakhand      | 2011        | 1.01<br>(0.9–1.13)  |
| Uttarakhand      | 2012        | 1.04<br>(0.92–1.17) |
| Uttarakhand      | 2013        | 1.06<br>(0.93–1.21) |
| Uttarakhand      | 2014        | 1.05<br>(0.91–1.22) |
| Uttarakhand      | 2015        | 1.08<br>(0.92–1.29) |
| Uttarakhand      | 2016        | 1.08<br>(0.9–1.3)   |
| Uttarakhand      | 2017        | 1.08<br>(0.89–1.3)  |
| West Bengal      | 1950        | 0.89<br>(0.88–0.89) |
| West Bengal      | 1951        | 0.87<br>(0.83–0.91) |
| West Bengal      | 1952        | 0.87<br>(0.81–0.93) |
| West Bengal      | 1953        | 0.87<br>(0.8–0.95)  |
| West Bengal      | 1954        | 0.86<br>(0.79–0.94) |
| West Bengal      | 1955        | 0.86<br>(0.77–0.94) |
| West Bengal      | 1956        | 0.87<br>(0.77–0.97) |
| West Bengal      | 1957        | 0.89<br>(0.77–1.01) |
| West Bengal      | 1958        | 0.91<br>(0.78–1.05) |
| West Bengal      | 1959        | 0.92<br>(0.79–1.07) |
| West Bengal      | 1960        | 0.96<br>(0.81–1.12) |
| West Bengal      | 1961        | 0.98<br>(0.84–1.13) |
| West Bengal      | 1962        | 0.98<br>(0.83–1.12) |
| West Bengal      | 1963        | 0.98<br>(0.85–1.12) |
| West Bengal      | 1964        | 0.99<br>(0.87–1.11) |
| West Bengal      | 1965        | 1.02<br>(0.91–1.13) |
| West Bengal      | 1966        | 1.03<br>(0.93–1.13) |
| West Bengal      | 1967        | 1.04<br>(0.95–1.14) |
| West Bengal      | 1968        | 1.03<br>(0.93–1.13) |
| West Bengal      | 1969        | 1.02<br>(0.93–1.13) |
| West Bengal      | 1970        | 1.02<br>(0.92–1.13) |
| West Bengal      | 1971        | 1.02<br>(0.92–1.12) |

**Table 15 Ratio of adjusted to unadjusted 5q0 values for scaled locations by year**

| <b>Geography</b> | <b>Year</b> | <b>Ratio</b>        |
|------------------|-------------|---------------------|
| West Bengal      | 1972        | 1.02<br>(0.93–1.12) |
| West Bengal      | 1973        | 1.03<br>(0.94–1.12) |
| West Bengal      | 1974        | 1.03<br>(0.94–1.12) |
| West Bengal      | 1975        | 1.04<br>(0.95–1.14) |
| West Bengal      | 1976        | 1.05<br>(0.96–1.15) |
| West Bengal      | 1977        | 1.04<br>(0.96–1.14) |
| West Bengal      | 1978        | 1.04<br>(0.95–1.14) |
| West Bengal      | 1979        | 1.02<br>(0.94–1.12) |
| West Bengal      | 1980        | 1.01<br>(0.93–1.09) |
| West Bengal      | 1981        | 1.0<br>(0.92–1.09)  |
| West Bengal      | 1982        | 0.99<br>(0.92–1.08) |
| West Bengal      | 1983        | 0.99<br>(0.91–1.08) |
| West Bengal      | 1984        | 0.99<br>(0.91–1.07) |
| West Bengal      | 1985        | 0.98<br>(0.9–1.06)  |
| West Bengal      | 1986        | 0.97<br>(0.9–1.05)  |
| West Bengal      | 1987        | 0.97<br>(0.9–1.05)  |
| West Bengal      | 1988        | 0.97<br>(0.9–1.05)  |
| West Bengal      | 1989        | 0.97<br>(0.9–1.05)  |
| West Bengal      | 1990        | 0.97<br>(0.89–1.05) |
| West Bengal      | 1991        | 0.97<br>(0.89–1.06) |
| West Bengal      | 1992        | 0.97<br>(0.89–1.05) |
| West Bengal      | 1993        | 0.96<br>(0.89–1.05) |
| West Bengal      | 1994        | 0.96<br>(0.88–1.05) |
| West Bengal      | 1995        | 0.96<br>(0.89–1.04) |
| West Bengal      | 1996        | 0.96<br>(0.89–1.03) |
| West Bengal      | 1997        | 0.96<br>(0.89–1.03) |
| West Bengal      | 1998        | 0.96<br>(0.89–1.03) |
| West Bengal      | 1999        | 0.96<br>(0.89–1.04) |
| West Bengal      | 2000        | 0.97<br>(0.9–1.05)  |
| West Bengal      | 2001        | 0.97<br>(0.89–1.05) |
| West Bengal      | 2002        | 0.96<br>(0.89–1.04) |

**Table 15 Ratio of adjusted to unadjusted 5q0 values for scaled locations by year**

| <b>Geography</b>                   | <b>Year</b> | <b>Ratio</b>        |
|------------------------------------|-------------|---------------------|
| West Bengal                        | 2003        | 0.96<br>(0.9–1.03)  |
| West Bengal                        | 2004        | 0.97<br>(0.9–1.04)  |
| West Bengal                        | 2005        | 0.97<br>(0.9–1.04)  |
| West Bengal                        | 2006        | 0.97<br>(0.89–1.05) |
| West Bengal                        | 2007        | 0.97<br>(0.88–1.08) |
| West Bengal                        | 2008        | 0.98<br>(0.89–1.09) |
| West Bengal                        | 2009        | 0.99<br>(0.89–1.1)  |
| West Bengal                        | 2010        | 1.0<br>(0.89–1.1)   |
| West Bengal                        | 2011        | 1.01<br>(0.9–1.13)  |
| West Bengal                        | 2012        | 1.04<br>(0.92–1.17) |
| West Bengal                        | 2013        | 1.06<br>(0.93–1.21) |
| West Bengal                        | 2014        | 1.05<br>(0.91–1.22) |
| West Bengal                        | 2015        | 1.08<br>(0.92–1.29) |
| West Bengal                        | 2016        | 1.08<br>(0.9–1.3)   |
| West Bengal                        | 2017        | 1.08<br>(0.89–1.3)  |
| Union Territories other than Delhi | 1950        | 0.87<br>(0.86–0.88) |
| Union Territories other than Delhi | 1951        | 0.86<br>(0.81–0.9)  |
| Union Territories other than Delhi | 1952        | 0.86<br>(0.79–0.92) |
| Union Territories other than Delhi | 1953        | 0.86<br>(0.78–0.94) |
| Union Territories other than Delhi | 1954        | 0.85<br>(0.77–0.93) |
| Union Territories other than Delhi | 1955        | 0.84<br>(0.75–0.94) |
| Union Territories other than Delhi | 1956        | 0.85<br>(0.74–0.97) |
| Union Territories other than Delhi | 1957        | 0.88<br>(0.75–1.01) |
| Union Territories other than Delhi | 1958        | 0.91<br>(0.76–1.05) |
| Union Territories other than Delhi | 1959        | 0.92<br>(0.77–1.07) |
| Union Territories other than Delhi | 1960        | 0.96<br>(0.8–1.13)  |
| Union Territories other than Delhi | 1961        | 0.97<br>(0.82–1.14) |
| Union Territories other than Delhi | 1962        | 0.97<br>(0.82–1.14) |
| Union Territories other than Delhi | 1963        | 0.98<br>(0.84–1.13) |
| Union Territories other than Delhi | 1964        | 0.99<br>(0.85–1.12) |
| Union Territories other than Delhi | 1965        | 1.02<br>(0.9–1.14)  |

**Table 15 Ratio of adjusted to unadjusted 5q0 values for scaled locations by year**

| <b>Geography</b>                   | <b>Year</b> | <b>Ratio</b>        |
|------------------------------------|-------------|---------------------|
| Union Territories other than Delhi | 1966        | 1.03<br>(0.93–1.14) |
| Union Territories other than Delhi | 1967        | 1.05<br>(0.94–1.16) |
| Union Territories other than Delhi | 1968        | 1.03<br>(0.92–1.14) |
| Union Territories other than Delhi | 1969        | 1.03<br>(0.92–1.15) |
| Union Territories other than Delhi | 1970        | 1.02<br>(0.91–1.14) |
| Union Territories other than Delhi | 1971        | 1.02<br>(0.92–1.13) |
| Union Territories other than Delhi | 1972        | 1.02<br>(0.92–1.13) |
| Union Territories other than Delhi | 1973        | 1.03<br>(0.93–1.13) |
| Union Territories other than Delhi | 1974        | 1.03<br>(0.94–1.13) |
| Union Territories other than Delhi | 1975        | 1.05<br>(0.95–1.15) |
| Union Territories other than Delhi | 1976        | 1.05<br>(0.96–1.15) |
| Union Territories other than Delhi | 1977        | 1.05<br>(0.96–1.15) |
| Union Territories other than Delhi | 1978        | 1.04<br>(0.95–1.15) |
| Union Territories other than Delhi | 1979        | 1.02<br>(0.94–1.13) |
| Union Territories other than Delhi | 1980        | 1.01<br>(0.92–1.1)  |
| Union Territories other than Delhi | 1981        | 1.0<br>(0.92–1.09)  |
| Union Territories other than Delhi | 1982        | 0.99<br>(0.91–1.08) |
| Union Territories other than Delhi | 1983        | 0.99<br>(0.91–1.08) |
| Union Territories other than Delhi | 1984        | 0.99<br>(0.9–1.07)  |
| Union Territories other than Delhi | 1985        | 0.97<br>(0.89–1.06) |
| Union Territories other than Delhi | 1986        | 0.97<br>(0.89–1.05) |
| Union Territories other than Delhi | 1987        | 0.97<br>(0.9–1.05)  |
| Union Territories other than Delhi | 1988        | 0.97<br>(0.89–1.06) |
| Union Territories other than Delhi | 1989        | 0.97<br>(0.9–1.05)  |
| Union Territories other than Delhi | 1990        | 0.97<br>(0.89–1.05) |
| Union Territories other than Delhi | 1991        | 0.97<br>(0.89–1.06) |
| Union Territories other than Delhi | 1992        | 0.97<br>(0.88–1.05) |
| Union Territories other than Delhi | 1993        | 0.96<br>(0.88–1.05) |
| Union Territories other than Delhi | 1994        | 0.96<br>(0.88–1.05) |
| Union Territories other than Delhi | 1995        | 0.96<br>(0.89–1.04) |
| Union Territories other than Delhi | 1996        | 0.96<br>(0.89–1.03) |

**Table 15 Ratio of adjusted to unadjusted 5q0 values for scaled locations by year**

| <b>Geography</b>                   | <b>Year</b> | <b>Ratio</b>        |
|------------------------------------|-------------|---------------------|
| Union Territories other than Delhi | 1997        | 0.96<br>(0.89–1.03) |
| Union Territories other than Delhi | 1998        | 0.96<br>(0.89–1.03) |
| Union Territories other than Delhi | 1999        | 0.96<br>(0.89–1.04) |
| Union Territories other than Delhi | 2000        | 0.97<br>(0.89–1.05) |
| Union Territories other than Delhi | 2001        | 0.97<br>(0.89–1.05) |
| Union Territories other than Delhi | 2002        | 0.96<br>(0.89–1.04) |
| Union Territories other than Delhi | 2003        | 0.96<br>(0.9–1.03)  |
| Union Territories other than Delhi | 2004        | 0.97<br>(0.9–1.04)  |
| Union Territories other than Delhi | 2005        | 0.97<br>(0.9–1.04)  |
| Union Territories other than Delhi | 2006        | 0.97<br>(0.89–1.05) |
| Union Territories other than Delhi | 2007        | 0.97<br>(0.88–1.08) |
| Union Territories other than Delhi | 2008        | 0.98<br>(0.89–1.09) |
| Union Territories other than Delhi | 2009        | 0.98<br>(0.89–1.1)  |
| Union Territories other than Delhi | 2010        | 1.0<br>(0.89–1.1)   |
| Union Territories other than Delhi | 2011        | 1.01<br>(0.9–1.13)  |
| Union Territories other than Delhi | 2012        | 1.04<br>(0.92–1.17) |
| Union Territories other than Delhi | 2013        | 1.06<br>(0.93–1.22) |
| Union Territories other than Delhi | 2014        | 1.05<br>(0.91–1.22) |
| Union Territories other than Delhi | 2015        | 1.08<br>(0.92–1.29) |
| Union Territories other than Delhi | 2016        | 1.08<br>(0.9–1.3)   |
| Union Territories other than Delhi | 2017        | 1.08<br>(0.89–1.3)  |
| Kenya                              | 1950        | 1.0<br>(1.0–1.0)    |
| Kenya                              | 1951        | 1.0<br>(1.0–1.0)    |
| Kenya                              | 1952        | 1.0<br>(1.0–1.0)    |
| Kenya                              | 1953        | 1.0<br>(1.0–1.0)    |
| Kenya                              | 1954        | 1.0<br>(1.0–1.0)    |
| Kenya                              | 1955        | 1.0<br>(1.0–1.0)    |
| Kenya                              | 1956        | 1.0<br>(1.0–1.0)    |
| Kenya                              | 1957        | 1.0<br>(1.0–1.0)    |
| Kenya                              | 1958        | 1.0<br>(1.0–1.0)    |
| Kenya                              | 1959        | 1.0<br>(1.0–1.0)    |



**Table 15 Ratio of adjusted to unadjusted 5q0 values for scaled locations by year**

| <b>Geography</b> | <b>Year</b> | <b>Ratio</b>     |
|------------------|-------------|------------------|
| Kenya            | 1960        | 1.0<br>(1.0–1.0) |
| Kenya            | 1961        | 1.0<br>(1.0–1.0) |
| Kenya            | 1962        | 1.0<br>(1.0–1.0) |
| Kenya            | 1963        | 1.0<br>(1.0–1.0) |
| Kenya            | 1964        | 1.0<br>(1.0–1.0) |
| Kenya            | 1965        | 1.0<br>(1.0–1.0) |
| Kenya            | 1966        | 1.0<br>(1.0–1.0) |
| Kenya            | 1967        | 1.0<br>(1.0–1.0) |
| Kenya            | 1968        | 1.0<br>(1.0–1.0) |
| Kenya            | 1969        | 1.0<br>(1.0–1.0) |
| Kenya            | 1970        | 1.0<br>(1.0–1.0) |
| Kenya            | 1971        | 1.0<br>(1.0–1.0) |
| Kenya            | 1972        | 1.0<br>(1.0–1.0) |
| Kenya            | 1973        | 1.0<br>(1.0–1.0) |
| Kenya            | 1974        | 1.0<br>(1.0–1.0) |
| Kenya            | 1975        | 1.0<br>(1.0–1.0) |
| Kenya            | 1976        | 1.0<br>(1.0–1.0) |
| Kenya            | 1977        | 1.0<br>(1.0–1.0) |
| Kenya            | 1978        | 1.0<br>(1.0–1.0) |
| Kenya            | 1979        | 1.0<br>(1.0–1.0) |
| Kenya            | 1980        | 1.0<br>(1.0–1.0) |
| Kenya            | 1981        | 1.0<br>(1.0–1.0) |
| Kenya            | 1982        | 1.0<br>(1.0–1.0) |
| Kenya            | 1983        | 1.0<br>(1.0–1.0) |
| Kenya            | 1984        | 1.0<br>(1.0–1.0) |
| Kenya            | 1985        | 1.0<br>(1.0–1.0) |
| Kenya            | 1986        | 1.0<br>(1.0–1.0) |
| Kenya            | 1987        | 1.0<br>(1.0–1.0) |
| Kenya            | 1988        | 1.0<br>(1.0–1.0) |
| Kenya            | 1989        | 1.0<br>(1.0–1.0) |
| Kenya            | 1990        | 1.0<br>(1.0–1.0) |

**Table 15 Ratio of adjusted to unadjusted 5q0 values for scaled locations by year**

| <b>Geography</b> | <b>Year</b> | <b>Ratio</b>        |
|------------------|-------------|---------------------|
| Kenya            | 1991        | 1.0<br>(1.0–1.0)    |
| Kenya            | 1992        | 1.0<br>(1.0–1.0)    |
| Kenya            | 1993        | 1.0<br>(1.0–1.0)    |
| Kenya            | 1994        | 1.0<br>(1.0–1.0)    |
| Kenya            | 1995        | 1.0<br>(1.0–1.0)    |
| Kenya            | 1996        | 1.0<br>(1.0–1.0)    |
| Kenya            | 1997        | 1.0<br>(1.0–1.0)    |
| Kenya            | 1998        | 1.0<br>(1.0–1.0)    |
| Kenya            | 1999        | 1.0<br>(1.0–1.0)    |
| Kenya            | 2000        | 1.0<br>(1.0–1.0)    |
| Kenya            | 2001        | 1.0<br>(1.0–1.0)    |
| Kenya            | 2002        | 1.0<br>(1.0–1.0)    |
| Kenya            | 2003        | 1.0<br>(1.0–1.0)    |
| Kenya            | 2004        | 1.0<br>(1.0–1.0)    |
| Kenya            | 2005        | 1.0<br>(1.0–1.0)    |
| Kenya            | 2006        | 1.0<br>(1.0–1.0)    |
| Kenya            | 2007        | 1.0<br>(1.0–1.0)    |
| Kenya            | 2008        | 1.0<br>(1.0–1.0)    |
| Kenya            | 2009        | 1.0<br>(1.0–1.0)    |
| Kenya            | 2010        | 1.0<br>(1.0–1.0)    |
| Kenya            | 2011        | 1.0<br>(1.0–1.0)    |
| Kenya            | 2012        | 1.0<br>(1.0–1.0)    |
| Kenya            | 2013        | 1.0<br>(1.0–1.0)    |
| Kenya            | 2014        | 1.0<br>(1.0–1.0)    |
| Kenya            | 2015        | 1.0<br>(1.0–1.0)    |
| Kenya            | 2016        | 1.0<br>(1.0–1.0)    |
| Kenya            | 2017        | 1.0<br>(1.0–1.0)    |
| Baringo          | 1950        | 0.28<br>(0.28–0.29) |
| Baringo          | 1951        | 0.29<br>(0.27–0.3)  |
| Baringo          | 1952        | 0.29<br>(0.27–0.31) |
| Baringo          | 1953        | 0.3<br>(0.27–0.32)  |

**Table 15 Ratio of adjusted to unadjusted 5q0 values for scaled locations by year**

| <b>Geography</b> | <b>Year</b> | <b>Ratio</b>        |
|------------------|-------------|---------------------|
| Baringo          | 1954        | 0.3<br>(0.28–0.33)  |
| Baringo          | 1955        | 0.31<br>(0.28–0.34) |
| Baringo          | 1956        | 0.32<br>(0.28–0.36) |
| Baringo          | 1957        | 0.32<br>(0.28–0.36) |
| Baringo          | 1958        | 0.33<br>(0.29–0.37) |
| Baringo          | 1959        | 0.33<br>(0.29–0.38) |
| Baringo          | 1960        | 0.34<br>(0.3–0.38)  |
| Baringo          | 1961        | 0.35<br>(0.31–0.39) |
| Baringo          | 1962        | 0.35<br>(0.32–0.39) |
| Baringo          | 1963        | 0.36<br>(0.33–0.4)  |
| Baringo          | 1964        | 0.37<br>(0.34–0.41) |
| Baringo          | 1965        | 0.39<br>(0.35–0.43) |
| Baringo          | 1966        | 0.41<br>(0.36–0.46) |
| Baringo          | 1967        | 0.43<br>(0.38–0.48) |
| Baringo          | 1968        | 0.46<br>(0.4–0.51)  |
| Baringo          | 1969        | 0.48<br>(0.43–0.53) |
| Baringo          | 1970        | 0.51<br>(0.46–0.56) |
| Baringo          | 1971        | 0.53<br>(0.48–0.58) |
| Baringo          | 1972        | 0.56<br>(0.51–0.6)  |
| Baringo          | 1973        | 0.58<br>(0.53–0.64) |
| Baringo          | 1974        | 0.61<br>(0.55–0.67) |
| Baringo          | 1975        | 0.63<br>(0.57–0.7)  |
| Baringo          | 1976        | 0.66<br>(0.59–0.73) |
| Baringo          | 1977        | 0.68<br>(0.6–0.76)  |
| Baringo          | 1978        | 0.7<br>(0.62–0.8)   |
| Baringo          | 1979        | 0.72<br>(0.63–0.82) |
| Baringo          | 1980        | 0.74<br>(0.64–0.85) |
| Baringo          | 1981        | 0.75<br>(0.66–0.87) |
| Baringo          | 1982        | 0.77<br>(0.68–0.87) |
| Baringo          | 1983        | 0.78<br>(0.69–0.88) |
| Baringo          | 1984        | 0.79<br>(0.71–0.88) |

**Table 15 Ratio of adjusted to unadjusted 5q0 values for scaled locations by year**

| <b>Geography</b> | <b>Year</b> | <b>Ratio</b>        |
|------------------|-------------|---------------------|
| Baringo          | 1985        | 0.8<br>(0.72–0.89)  |
| Baringo          | 1986        | 0.81<br>(0.74–0.88) |
| Baringo          | 1987        | 0.82<br>(0.75–0.9)  |
| Baringo          | 1988        | 0.83<br>(0.75–0.92) |
| Baringo          | 1989        | 0.85<br>(0.76–0.95) |
| Baringo          | 1990        | 0.87<br>(0.76–0.97) |
| Baringo          | 1991        | 0.88<br>(0.77–0.99) |
| Baringo          | 1992        | 0.9<br>(0.79–1.01)  |
| Baringo          | 1993        | 0.92<br>(0.82–1.02) |
| Baringo          | 1994        | 0.94<br>(0.85–1.03) |
| Baringo          | 1995        | 0.96<br>(0.87–1.05) |
| Baringo          | 1996        | 0.97<br>(0.88–1.06) |
| Baringo          | 1997        | 0.98<br>(0.89–1.08) |
| Baringo          | 1998        | 0.99<br>(0.88–1.11) |
| Baringo          | 1999        | 0.99<br>(0.86–1.12) |
| Baringo          | 2000        | 0.99<br>(0.86–1.13) |
| Baringo          | 2001        | 0.99<br>(0.86–1.14) |
| Baringo          | 2002        | 0.99<br>(0.86–1.12) |
| Baringo          | 2003        | 0.98<br>(0.86–1.12) |
| Baringo          | 2004        | 0.98<br>(0.86–1.1)  |
| Baringo          | 2005        | 0.98<br>(0.87–1.1)  |
| Baringo          | 2006        | 0.98<br>(0.87–1.09) |
| Baringo          | 2007        | 0.97<br>(0.86–1.11) |
| Baringo          | 2008        | 0.98<br>(0.85–1.13) |
| Baringo          | 2009        | 0.99<br>(0.86–1.13) |
| Baringo          | 2010        | 0.99<br>(0.85–1.12) |
| Baringo          | 2011        | 0.98<br>(0.85–1.12) |
| Baringo          | 2012        | 0.98<br>(0.85–1.12) |
| Baringo          | 2013        | 0.99<br>(0.86–1.13) |
| Baringo          | 2014        | 1.0<br>(0.89–1.11)  |
| Baringo          | 2015        | 1.0<br>(0.92–1.09)  |

**Table 15 Ratio of adjusted to unadjusted 5q0 values for scaled locations by year**

| <b>Geography</b> | <b>Year</b> | <b>Ratio</b>        |
|------------------|-------------|---------------------|
| Baringo          | 2016        | 1.01<br>(0.95–1.07) |
| Baringo          | 2017        | 1.0<br>(0.99–1.02)  |
| Bomet            | 1950        | 0.23<br>(0.23–0.24) |
| Bomet            | 1951        | 0.24<br>(0.23–0.25) |
| Bomet            | 1952        | 0.24<br>(0.23–0.26) |
| Bomet            | 1953        | 0.25<br>(0.23–0.27) |
| Bomet            | 1954        | 0.25<br>(0.23–0.28) |
| Bomet            | 1955        | 0.26<br>(0.24–0.29) |
| Bomet            | 1956        | 0.27<br>(0.24–0.3)  |
| Bomet            | 1957        | 0.27<br>(0.24–0.31) |
| Bomet            | 1958        | 0.28<br>(0.24–0.32) |
| Bomet            | 1959        | 0.28<br>(0.25–0.33) |
| Bomet            | 1960        | 0.29<br>(0.25–0.33) |
| Bomet            | 1961        | 0.3<br>(0.26–0.34)  |
| Bomet            | 1962        | 0.31<br>(0.27–0.34) |
| Bomet            | 1963        | 0.31<br>(0.28–0.35) |
| Bomet            | 1964        | 0.33<br>(0.29–0.36) |
| Bomet            | 1965        | 0.34<br>(0.3–0.38)  |
| Bomet            | 1966        | 0.36<br>(0.31–0.41) |
| Bomet            | 1967        | 0.38<br>(0.33–0.44) |
| Bomet            | 1968        | 0.41<br>(0.36–0.46) |
| Bomet            | 1969        | 0.43<br>(0.38–0.49) |
| Bomet            | 1970        | 0.46<br>(0.41–0.52) |
| Bomet            | 1971        | 0.49<br>(0.44–0.54) |
| Bomet            | 1972        | 0.51<br>(0.47–0.56) |
| Bomet            | 1973        | 0.54<br>(0.49–0.6)  |
| Bomet            | 1974        | 0.57<br>(0.51–0.63) |
| Bomet            | 1975        | 0.6<br>(0.53–0.66)  |
| Bomet            | 1976        | 0.62<br>(0.55–0.7)  |
| Bomet            | 1977        | 0.65<br>(0.57–0.73) |
| Bomet            | 1978        | 0.68<br>(0.58–0.77) |

**Table 15 Ratio of adjusted to unadjusted 5q0 values for scaled locations by year**

| <b>Geography</b> | <b>Year</b> | <b>Ratio</b>        |
|------------------|-------------|---------------------|
| Bomet            | 1979        | 0.7<br>(0.6–0.81)   |
| Bomet            | 1980        | 0.72<br>(0.61–0.83) |
| Bomet            | 1981        | 0.73<br>(0.63–0.85) |
| Bomet            | 1982        | 0.75<br>(0.65–0.86) |
| Bomet            | 1983        | 0.76<br>(0.67–0.87) |
| Bomet            | 1984        | 0.78<br>(0.69–0.87) |
| Bomet            | 1985        | 0.79<br>(0.7–0.88)  |
| Bomet            | 1986        | 0.8<br>(0.73–0.87)  |
| Bomet            | 1987        | 0.81<br>(0.73–0.89) |
| Bomet            | 1988        | 0.82<br>(0.74–0.91) |
| Bomet            | 1989        | 0.84<br>(0.74–0.94) |
| Bomet            | 1990        | 0.86<br>(0.75–0.97) |
| Bomet            | 1991        | 0.87<br>(0.76–0.99) |
| Bomet            | 1992        | 0.89<br>(0.78–1.01) |
| Bomet            | 1993        | 0.92<br>(0.81–1.02) |
| Bomet            | 1994        | 0.93<br>(0.84–1.03) |
| Bomet            | 1995        | 0.96<br>(0.87–1.06) |
| Bomet            | 1996        | 0.97<br>(0.88–1.07) |
| Bomet            | 1997        | 0.98<br>(0.88–1.09) |
| Bomet            | 1998        | 0.99<br>(0.87–1.11) |
| Bomet            | 1999        | 0.99<br>(0.85–1.13) |
| Bomet            | 2000        | 0.99<br>(0.85–1.13) |
| Bomet            | 2001        | 0.99<br>(0.86–1.15) |
| Bomet            | 2002        | 0.99<br>(0.85–1.13) |
| Bomet            | 2003        | 0.98<br>(0.85–1.12) |
| Bomet            | 2004        | 0.98<br>(0.85–1.1)  |
| Bomet            | 2005        | 0.98<br>(0.87–1.1)  |
| Bomet            | 2006        | 0.98<br>(0.87–1.1)  |
| Bomet            | 2007        | 0.97<br>(0.86–1.11) |
| Bomet            | 2008        | 0.98<br>(0.85–1.13) |
| Bomet            | 2009        | 0.99<br>(0.85–1.13) |

**Table 15 Ratio of adjusted to unadjusted 5q0 values for scaled locations by year**

| <b>Geography</b> | <b>Year</b> | <b>Ratio</b>        |
|------------------|-------------|---------------------|
| Bomet            | 2010        | 0.99<br>(0.85–1.12) |
| Bomet            | 2011        | 0.98<br>(0.85–1.12) |
| Bomet            | 2012        | 0.98<br>(0.85–1.13) |
| Bomet            | 2013        | 0.99<br>(0.86–1.13) |
| Bomet            | 2014        | 1.0<br>(0.89–1.11)  |
| Bomet            | 2015        | 1.0<br>(0.91–1.09)  |
| Bomet            | 2016        | 1.01<br>(0.95–1.07) |
| Bomet            | 2017        | 1.0<br>(0.99–1.02)  |
| Bungoma          | 1950        | 0.8<br>(0.79–0.81)  |
| Bungoma          | 1951        | 0.82<br>(0.78–0.85) |
| Bungoma          | 1952        | 0.82<br>(0.77–0.88) |
| Bungoma          | 1953        | 0.82<br>(0.76–0.89) |
| Bungoma          | 1954        | 0.82<br>(0.74–0.9)  |
| Bungoma          | 1955        | 0.82<br>(0.73–0.92) |
| Bungoma          | 1956        | 0.82<br>(0.72–0.93) |
| Bungoma          | 1957        | 0.81<br>(0.71–0.92) |
| Bungoma          | 1958        | 0.81<br>(0.71–0.91) |
| Bungoma          | 1959        | 0.81<br>(0.71–0.91) |
| Bungoma          | 1960        | 0.81<br>(0.71–0.91) |
| Bungoma          | 1961        | 0.8<br>(0.71–0.9)   |
| Bungoma          | 1962        | 0.81<br>(0.72–0.9)  |
| Bungoma          | 1963        | 0.81<br>(0.72–0.9)  |
| Bungoma          | 1964        | 0.82<br>(0.73–0.91) |
| Bungoma          | 1965        | 0.83<br>(0.74–0.92) |
| Bungoma          | 1966        | 0.84<br>(0.75–0.92) |
| Bungoma          | 1967        | 0.85<br>(0.77–0.94) |
| Bungoma          | 1968        | 0.86<br>(0.78–0.95) |
| Bungoma          | 1969        | 0.87<br>(0.79–0.97) |
| Bungoma          | 1970        | 0.89<br>(0.81–0.97) |
| Bungoma          | 1971        | 0.9<br>(0.83–0.99)  |
| Bungoma          | 1972        | 0.92<br>(0.84–1.01) |

**Table 15 Ratio of adjusted to unadjusted 5q0 values for scaled locations by year**

| <b>Geography</b> | <b>Year</b> | <b>Ratio</b>        |
|------------------|-------------|---------------------|
| Bungoma          | 1973        | 0.94<br>(0.85–1.03) |
| Bungoma          | 1974        | 0.95<br>(0.85–1.05) |
| Bungoma          | 1975        | 0.96<br>(0.84–1.08) |
| Bungoma          | 1976        | 0.97<br>(0.84–1.11) |
| Bungoma          | 1977        | 0.98<br>(0.83–1.14) |
| Bungoma          | 1978        | 0.98<br>(0.83–1.15) |
| Bungoma          | 1979        | 0.99<br>(0.84–1.15) |
| Bungoma          | 1980        | 0.99<br>(0.85–1.14) |
| Bungoma          | 1981        | 1.0<br>(0.86–1.15)  |
| Bungoma          | 1982        | 1.0<br>(0.87–1.14)  |
| Bungoma          | 1983        | 1.0<br>(0.89–1.12)  |
| Bungoma          | 1984        | 1.0<br>(0.91–1.1)   |
| Bungoma          | 1985        | 1.0<br>(0.92–1.08)  |
| Bungoma          | 1986        | 1.0<br>(0.93–1.08)  |
| Bungoma          | 1987        | 1.0<br>(0.93–1.08)  |
| Bungoma          | 1988        | 1.01<br>(0.94–1.08) |
| Bungoma          | 1989        | 1.01<br>(0.94–1.09) |
| Bungoma          | 1990        | 1.03<br>(0.97–1.09) |
| Bungoma          | 1991        | 1.05<br>(0.99–1.1)  |
| Bungoma          | 1992        | 1.06<br>(0.99–1.14) |
| Bungoma          | 1993        | 1.08<br>(0.99–1.17) |
| Bungoma          | 1994        | 1.1<br>(1.0–1.21)   |
| Bungoma          | 1995        | 1.12<br>(1.01–1.25) |
| Bungoma          | 1996        | 1.12<br>(1.01–1.24) |
| Bungoma          | 1997        | 1.12<br>(1.01–1.23) |
| Bungoma          | 1998        | 1.12<br>(1.01–1.23) |
| Bungoma          | 1999        | 1.11<br>(1.01–1.23) |
| Bungoma          | 2000        | 1.11<br>(1.0–1.24)  |
| Bungoma          | 2001        | 1.11<br>(0.98–1.24) |
| Bungoma          | 2002        | 1.1<br>(0.97–1.25)  |
| Bungoma          | 2003        | 1.11<br>(0.97–1.25) |



**Table 15 Ratio of adjusted to unadjusted 5q0 values for scaled locations by year**

| <b>Geography</b> | <b>Year</b> | <b>Ratio</b>        |
|------------------|-------------|---------------------|
| Bungoma          | 2004        | 1.1<br>(0.98–1.23)  |
| Bungoma          | 2005        | 1.1<br>(0.99–1.23)  |
| Bungoma          | 2006        | 1.11<br>(1.0–1.23)  |
| Bungoma          | 2007        | 1.13<br>(1.03–1.24) |
| Bungoma          | 2008        | 1.14<br>(1.03–1.25) |
| Bungoma          | 2009        | 1.14<br>(1.01–1.27) |
| Bungoma          | 2010        | 1.13<br>(1.0–1.27)  |
| Bungoma          | 2011        | 1.13<br>(0.99–1.27) |
| Bungoma          | 2012        | 1.13<br>(1.0–1.26)  |
| Bungoma          | 2013        | 1.13<br>(1.01–1.25) |
| Bungoma          | 2014        | 1.13<br>(1.03–1.24) |
| Bungoma          | 2015        | 1.12<br>(1.04–1.21) |
| Bungoma          | 2016        | 1.12<br>(1.07–1.17) |
| Bungoma          | 2017        | 1.12<br>(1.09–1.14) |
| Busia            | 1950        | 0.82<br>(0.8–0.83)  |
| Busia            | 1951        | 0.83<br>(0.8–0.86)  |
| Busia            | 1952        | 0.83<br>(0.79–0.89) |
| Busia            | 1953        | 0.83<br>(0.78–0.9)  |
| Busia            | 1954        | 0.83<br>(0.76–0.91) |
| Busia            | 1955        | 0.83<br>(0.75–0.93) |
| Busia            | 1956        | 0.83<br>(0.74–0.93) |
| Busia            | 1957        | 0.83<br>(0.73–0.93) |
| Busia            | 1958        | 0.82<br>(0.73–0.92) |
| Busia            | 1959        | 0.82<br>(0.73–0.92) |
| Busia            | 1960        | 0.82<br>(0.73–0.92) |
| Busia            | 1961        | 0.82<br>(0.73–0.91) |
| Busia            | 1962        | 0.82<br>(0.73–0.9)  |
| Busia            | 1963        | 0.82<br>(0.74–0.91) |
| Busia            | 1964        | 0.83<br>(0.74–0.92) |
| Busia            | 1965        | 0.84<br>(0.75–0.92) |
| Busia            | 1966        | 0.85<br>(0.77–0.93) |

**Table 15 Ratio of adjusted to unadjusted 5q0 values for scaled locations by year**

| <b>Geography</b> | <b>Year</b> | <b>Ratio</b>        |
|------------------|-------------|---------------------|
| Busia            | 1967        | 0.86<br>(0.78–0.94) |
| Busia            | 1968        | 0.87<br>(0.79–0.96) |
| Busia            | 1969        | 0.88<br>(0.8–0.97)  |
| Busia            | 1970        | 0.89<br>(0.82–0.97) |
| Busia            | 1971        | 0.91<br>(0.83–0.99) |
| Busia            | 1972        | 0.92<br>(0.85–1.01) |
| Busia            | 1973        | 0.94<br>(0.85–1.03) |
| Busia            | 1974        | 0.95<br>(0.85–1.05) |
| Busia            | 1975        | 0.96<br>(0.85–1.08) |
| Busia            | 1976        | 0.97<br>(0.84–1.11) |
| Busia            | 1977        | 0.98<br>(0.84–1.13) |
| Busia            | 1978        | 0.98<br>(0.84–1.14) |
| Busia            | 1979        | 0.99<br>(0.84–1.14) |
| Busia            | 1980        | 0.99<br>(0.85–1.14) |
| Busia            | 1981        | 1.0<br>(0.86–1.15)  |
| Busia            | 1982        | 1.0<br>(0.88–1.13)  |
| Busia            | 1983        | 1.0<br>(0.9–1.12)   |
| Busia            | 1984        | 1.0<br>(0.91–1.1)   |
| Busia            | 1985        | 1.0<br>(0.92–1.08)  |
| Busia            | 1986        | 1.0<br>(0.93–1.08)  |
| Busia            | 1987        | 1.0<br>(0.93–1.08)  |
| Busia            | 1988        | 1.01<br>(0.94–1.08) |
| Busia            | 1989        | 1.01<br>(0.95–1.09) |
| Busia            | 1990        | 1.03<br>(0.97–1.09) |
| Busia            | 1991        | 1.04<br>(0.99–1.1)  |
| Busia            | 1992        | 1.06<br>(0.99–1.13) |
| Busia            | 1993        | 1.08<br>(0.99–1.17) |
| Busia            | 1994        | 1.1<br>(1.0–1.2)    |
| Busia            | 1995        | 1.11<br>(1.01–1.24) |
| Busia            | 1996        | 1.12<br>(1.01–1.24) |
| Busia            | 1997        | 1.12<br>(1.01–1.23) |

**Table 15 Ratio of adjusted to unadjusted 5q0 values for scaled locations by year**

| <b>Geography</b> | <b>Year</b> | <b>Ratio</b>        |
|------------------|-------------|---------------------|
| Busia            | 1998        | 1.11<br>(1.01–1.22) |
| Busia            | 1999        | 1.11<br>(1.01–1.22) |
| Busia            | 2000        | 1.11<br>(1.0–1.23)  |
| Busia            | 2001        | 1.1<br>(0.98–1.24)  |
| Busia            | 2002        | 1.1<br>(0.97–1.24)  |
| Busia            | 2003        | 1.1<br>(0.97–1.24)  |
| Busia            | 2004        | 1.1<br>(0.98–1.23)  |
| Busia            | 2005        | 1.1<br>(0.99–1.22)  |
| Busia            | 2006        | 1.11<br>(1.0–1.22)  |
| Busia            | 2007        | 1.13<br>(1.03–1.23) |
| Busia            | 2008        | 1.14<br>(1.03–1.25) |
| Busia            | 2009        | 1.14<br>(1.01–1.27) |
| Busia            | 2010        | 1.13<br>(1.0–1.27)  |
| Busia            | 2011        | 1.13<br>(0.99–1.27) |
| Busia            | 2012        | 1.13<br>(1.0–1.26)  |
| Busia            | 2013        | 1.13<br>(1.01–1.25) |
| Busia            | 2014        | 1.13<br>(1.03–1.24) |
| Busia            | 2015        | 1.12<br>(1.04–1.2)  |
| Busia            | 2016        | 1.12<br>(1.07–1.17) |
| Busia            | 2017        | 1.11<br>(1.09–1.14) |
| Elgeyo-Marakwet  | 1950        | 0.27<br>(0.27–0.28) |
| Elgeyo-Marakwet  | 1951        | 0.28<br>(0.26–0.29) |
| Elgeyo-Marakwet  | 1952        | 0.28<br>(0.26–0.3)  |
| Elgeyo-Marakwet  | 1953        | 0.28<br>(0.26–0.31) |
| Elgeyo-Marakwet  | 1954        | 0.29<br>(0.26–0.32) |
| Elgeyo-Marakwet  | 1955        | 0.29<br>(0.27–0.33) |
| Elgeyo-Marakwet  | 1956        | 0.3<br>(0.27–0.34)  |
| Elgeyo-Marakwet  | 1957        | 0.3<br>(0.27–0.35)  |
| Elgeyo-Marakwet  | 1958        | 0.31<br>(0.27–0.35) |
| Elgeyo-Marakwet  | 1959        | 0.31<br>(0.28–0.36) |
| Elgeyo-Marakwet  | 1960        | 0.32<br>(0.28–0.36) |

**Table 15 Ratio of adjusted to unadjusted 5q0 values for scaled locations by year**

| <b>Geography</b> | <b>Year</b> | <b>Ratio</b>        |
|------------------|-------------|---------------------|
| Elgeyo-Marakwet  | 1961        | 0.33<br>(0.29–0.37) |
| Elgeyo-Marakwet  | 1962        | 0.33<br>(0.3–0.37)  |
| Elgeyo-Marakwet  | 1963        | 0.34<br>(0.31–0.38) |
| Elgeyo-Marakwet  | 1964        | 0.35<br>(0.31–0.39) |
| Elgeyo-Marakwet  | 1965        | 0.36<br>(0.32–0.41) |
| Elgeyo-Marakwet  | 1966        | 0.38<br>(0.34–0.43) |
| Elgeyo-Marakwet  | 1967        | 0.4<br>(0.36–0.46)  |
| Elgeyo-Marakwet  | 1968        | 0.43<br>(0.38–0.49) |
| Elgeyo-Marakwet  | 1969        | 0.45<br>(0.4–0.51)  |
| Elgeyo-Marakwet  | 1970        | 0.48<br>(0.43–0.54) |
| Elgeyo-Marakwet  | 1971        | 0.51<br>(0.46–0.56) |
| Elgeyo-Marakwet  | 1972        | 0.53<br>(0.49–0.58) |
| Elgeyo-Marakwet  | 1973        | 0.56<br>(0.51–0.62) |
| Elgeyo-Marakwet  | 1974        | 0.58<br>(0.53–0.65) |
| Elgeyo-Marakwet  | 1975        | 0.61<br>(0.55–0.67) |
| Elgeyo-Marakwet  | 1976        | 0.63<br>(0.57–0.71) |
| Elgeyo-Marakwet  | 1977        | 0.66<br>(0.58–0.74) |
| Elgeyo-Marakwet  | 1978        | 0.69<br>(0.6–0.78)  |
| Elgeyo-Marakwet  | 1979        | 0.71<br>(0.61–0.81) |
| Elgeyo-Marakwet  | 1980        | 0.72<br>(0.62–0.84) |
| Elgeyo-Marakwet  | 1981        | 0.74<br>(0.64–0.86) |
| Elgeyo-Marakwet  | 1982        | 0.76<br>(0.66–0.86) |
| Elgeyo-Marakwet  | 1983        | 0.77<br>(0.68–0.87) |
| Elgeyo-Marakwet  | 1984        | 0.78<br>(0.7–0.88)  |
| Elgeyo-Marakwet  | 1985        | 0.79<br>(0.71–0.88) |
| Elgeyo-Marakwet  | 1986        | 0.8<br>(0.73–0.88)  |
| Elgeyo-Marakwet  | 1987        | 0.81<br>(0.74–0.89) |
| Elgeyo-Marakwet  | 1988        | 0.83<br>(0.74–0.92) |
| Elgeyo-Marakwet  | 1989        | 0.84<br>(0.75–0.94) |
| Elgeyo-Marakwet  | 1990        | 0.86<br>(0.75–0.97) |
| Elgeyo-Marakwet  | 1991        | 0.88<br>(0.76–0.99) |

**Table 15 Ratio of adjusted to unadjusted 5q0 values for scaled locations by year**

| <b>Geography</b> | <b>Year</b> | <b>Ratio</b>        |
|------------------|-------------|---------------------|
| Elgeyo-Marakwet  | 1992        | 0.9<br>(0.78–1.01)  |
| Elgeyo-Marakwet  | 1993        | 0.92<br>(0.81–1.02) |
| Elgeyo-Marakwet  | 1994        | 0.94<br>(0.84–1.03) |
| Elgeyo-Marakwet  | 1995        | 0.96<br>(0.87–1.05) |
| Elgeyo-Marakwet  | 1996        | 0.97<br>(0.88–1.06) |
| Elgeyo-Marakwet  | 1997        | 0.98<br>(0.88–1.09) |
| Elgeyo-Marakwet  | 1998        | 0.99<br>(0.87–1.11) |
| Elgeyo-Marakwet  | 1999        | 0.99<br>(0.86–1.13) |
| Elgeyo-Marakwet  | 2000        | 0.99<br>(0.85–1.13) |
| Elgeyo-Marakwet  | 2001        | 0.99<br>(0.86–1.14) |
| Elgeyo-Marakwet  | 2002        | 0.99<br>(0.86–1.13) |
| Elgeyo-Marakwet  | 2003        | 0.98<br>(0.86–1.12) |
| Elgeyo-Marakwet  | 2004        | 0.98<br>(0.86–1.1)  |
| Elgeyo-Marakwet  | 2005        | 0.98<br>(0.87–1.1)  |
| Elgeyo-Marakwet  | 2006        | 0.98<br>(0.87–1.1)  |
| Elgeyo-Marakwet  | 2007        | 0.97<br>(0.86–1.11) |
| Elgeyo-Marakwet  | 2008        | 0.98<br>(0.85–1.13) |
| Elgeyo-Marakwet  | 2009        | 0.99<br>(0.85–1.13) |
| Elgeyo-Marakwet  | 2010        | 0.99<br>(0.85–1.12) |
| Elgeyo-Marakwet  | 2011        | 0.98<br>(0.85–1.12) |
| Elgeyo-Marakwet  | 2012        | 0.98<br>(0.85–1.13) |
| Elgeyo-Marakwet  | 2013        | 0.99<br>(0.86–1.13) |
| Elgeyo-Marakwet  | 2014        | 1.0<br>(0.89–1.11)  |
| Elgeyo-Marakwet  | 2015        | 1.0<br>(0.91–1.09)  |
| Elgeyo-Marakwet  | 2016        | 1.01<br>(0.95–1.07) |
| Elgeyo-Marakwet  | 2017        | 1.0<br>(0.99–1.02)  |
| Embu             | 1950        | 0.58<br>(0.57–0.59) |
| Embu             | 1951        | 0.59<br>(0.56–0.62) |
| Embu             | 1952        | 0.6<br>(0.56–0.64)  |
| Embu             | 1953        | 0.6<br>(0.55–0.66)  |
| Embu             | 1954        | 0.61<br>(0.55–0.67) |

**Table 15 Ratio of adjusted to unadjusted 5q0 values for scaled locations by year**

| <b>Geography</b> | <b>Year</b> | <b>Ratio</b>        |
|------------------|-------------|---------------------|
| Embu             | 1955        | 0.62<br>(0.55–0.68) |
| Embu             | 1956        | 0.62<br>(0.55–0.69) |
| Embu             | 1957        | 0.62<br>(0.55–0.7)  |
| Embu             | 1958        | 0.62<br>(0.55–0.7)  |
| Embu             | 1959        | 0.63<br>(0.55–0.7)  |
| Embu             | 1960        | 0.63<br>(0.56–0.71) |
| Embu             | 1961        | 0.63<br>(0.56–0.71) |
| Embu             | 1962        | 0.64<br>(0.57–0.71) |
| Embu             | 1963        | 0.65<br>(0.57–0.72) |
| Embu             | 1964        | 0.66<br>(0.59–0.74) |
| Embu             | 1965        | 0.67<br>(0.59–0.75) |
| Embu             | 1966        | 0.68<br>(0.61–0.76) |
| Embu             | 1967        | 0.7<br>(0.63–0.77)  |
| Embu             | 1968        | 0.71<br>(0.64–0.8)  |
| Embu             | 1969        | 0.73<br>(0.65–0.81) |
| Embu             | 1970        | 0.74<br>(0.67–0.82) |
| Embu             | 1971        | 0.76<br>(0.69–0.83) |
| Embu             | 1972        | 0.77<br>(0.71–0.84) |
| Embu             | 1973        | 0.78<br>(0.71–0.86) |
| Embu             | 1974        | 0.79<br>(0.72–0.87) |
| Embu             | 1975        | 0.8<br>(0.73–0.88)  |
| Embu             | 1976        | 0.81<br>(0.74–0.89) |
| Embu             | 1977        | 0.82<br>(0.74–0.9)  |
| Embu             | 1978        | 0.83<br>(0.75–0.91) |
| Embu             | 1979        | 0.84<br>(0.76–0.93) |
| Embu             | 1980        | 0.85<br>(0.77–0.94) |
| Embu             | 1981        | 0.86<br>(0.78–0.95) |
| Embu             | 1982        | 0.87<br>(0.78–0.96) |
| Embu             | 1983        | 0.88<br>(0.79–0.98) |
| Embu             | 1984        | 0.89<br>(0.79–0.99) |
| Embu             | 1985        | 0.89<br>(0.79–1.0)  |

**Table 15 Ratio of adjusted to unadjusted 5q0 values for scaled locations by year**

| <b>Geography</b> | <b>Year</b> | <b>Ratio</b>        |
|------------------|-------------|---------------------|
| Embu             | 1986        | 0.9<br>(0.79–1.0)   |
| Embu             | 1987        | 0.9<br>(0.81–1.0)   |
| Embu             | 1988        | 0.91<br>(0.83–1.0)  |
| Embu             | 1989        | 0.91<br>(0.84–1.0)  |
| Embu             | 1990        | 0.92<br>(0.85–1.0)  |
| Embu             | 1991        | 0.93<br>(0.84–1.01) |
| Embu             | 1992        | 0.94<br>(0.85–1.03) |
| Embu             | 1993        | 0.95<br>(0.84–1.05) |
| Embu             | 1994        | 0.95<br>(0.85–1.05) |
| Embu             | 1995        | 0.95<br>(0.85–1.05) |
| Embu             | 1996        | 0.95<br>(0.85–1.04) |
| Embu             | 1997        | 0.95<br>(0.86–1.04) |
| Embu             | 1998        | 0.95<br>(0.87–1.03) |
| Embu             | 1999        | 0.95<br>(0.87–1.03) |
| Embu             | 2000        | 0.94<br>(0.86–1.03) |
| Embu             | 2001        | 0.94<br>(0.84–1.04) |
| Embu             | 2002        | 0.94<br>(0.84–1.04) |
| Embu             | 2003        | 0.94<br>(0.83–1.05) |
| Embu             | 2004        | 0.93<br>(0.83–1.05) |
| Embu             | 2005        | 0.92<br>(0.83–1.03) |
| Embu             | 2006        | 0.92<br>(0.83–1.01) |
| Embu             | 2007        | 0.92<br>(0.84–1.01) |
| Embu             | 2008        | 0.94<br>(0.85–1.04) |
| Embu             | 2009        | 0.95<br>(0.84–1.07) |
| Embu             | 2010        | 0.96<br>(0.84–1.09) |
| Embu             | 2011        | 0.96<br>(0.84–1.1)  |
| Embu             | 2012        | 0.97<br>(0.84–1.12) |
| Embu             | 2013        | 0.99<br>(0.86–1.13) |
| Embu             | 2014        | 1.0<br>(0.88–1.13)  |
| Embu             | 2015        | 1.0<br>(0.91–1.1)   |
| Embu             | 2016        | 1.0<br>(0.94–1.06)  |

**Table 15 Ratio of adjusted to unadjusted 5q0 values for scaled locations by year**

| <b>Geography</b> | <b>Year</b> | <b>Ratio</b>        |
|------------------|-------------|---------------------|
| Embu             | 2017        | 1.0<br>(0.96–1.03)  |
| Garissa          | 1950        | 0.56<br>(0.56–0.57) |
| Garissa          | 1951        | 0.56<br>(0.53–0.59) |
| Garissa          | 1952        | 0.56<br>(0.52–0.6)  |
| Garissa          | 1953        | 0.55<br>(0.5–0.6)   |
| Garissa          | 1954        | 0.55<br>(0.5–0.59)  |
| Garissa          | 1955        | 0.55<br>(0.49–0.6)  |
| Garissa          | 1956        | 0.54<br>(0.5–0.6)   |
| Garissa          | 1957        | 0.54<br>(0.49–0.6)  |
| Garissa          | 1958        | 0.54<br>(0.48–0.61) |
| Garissa          | 1959        | 0.55<br>(0.48–0.62) |
| Garissa          | 1960        | 0.55<br>(0.48–0.63) |
| Garissa          | 1961        | 0.56<br>(0.48–0.65) |
| Garissa          | 1962        | 0.56<br>(0.49–0.65) |
| Garissa          | 1963        | 0.58<br>(0.5–0.66)  |
| Garissa          | 1964        | 0.59<br>(0.51–0.67) |
| Garissa          | 1965        | 0.6<br>(0.53–0.68)  |
| Garissa          | 1966        | 0.62<br>(0.55–0.69) |
| Garissa          | 1967        | 0.64<br>(0.56–0.72) |
| Garissa          | 1968        | 0.65<br>(0.57–0.74) |
| Garissa          | 1969        | 0.66<br>(0.58–0.76) |
| Garissa          | 1970        | 0.68<br>(0.59–0.79) |
| Garissa          | 1971        | 0.7<br>(0.6–0.8)    |
| Garissa          | 1972        | 0.71<br>(0.63–0.82) |
| Garissa          | 1973        | 0.73<br>(0.65–0.82) |
| Garissa          | 1974        | 0.74<br>(0.67–0.81) |
| Garissa          | 1975        | 0.74<br>(0.67–0.82) |
| Garissa          | 1976        | 0.75<br>(0.66–0.84) |
| Garissa          | 1977        | 0.76<br>(0.66–0.86) |
| Garissa          | 1978        | 0.77<br>(0.66–0.89) |
| Garissa          | 1979        | 0.78<br>(0.67–0.89) |



**Table 15 Ratio of adjusted to unadjusted 5q0 values for scaled locations by year**

| <b>Geography</b> | <b>Year</b> | <b>Ratio</b>        |
|------------------|-------------|---------------------|
| Garissa          | 1980        | 0.78<br>(0.68–0.89) |
| Garissa          | 1981        | 0.78<br>(0.69–0.88) |
| Garissa          | 1982        | 0.78<br>(0.71–0.88) |
| Garissa          | 1983        | 0.79<br>(0.71–0.87) |
| Garissa          | 1984        | 0.79<br>(0.71–0.88) |
| Garissa          | 1985        | 0.79<br>(0.71–0.88) |
| Garissa          | 1986        | 0.79<br>(0.7–0.89)  |
| Garissa          | 1987        | 0.79<br>(0.7–0.89)  |
| Garissa          | 1988        | 0.79<br>(0.7–0.89)  |
| Garissa          | 1989        | 0.79<br>(0.7–0.89)  |
| Garissa          | 1990        | 0.8<br>(0.71–0.9)   |
| Garissa          | 1991        | 0.81<br>(0.72–0.89) |
| Garissa          | 1992        | 0.82<br>(0.74–0.9)  |
| Garissa          | 1993        | 0.82<br>(0.74–0.91) |
| Garissa          | 1994        | 0.83<br>(0.73–0.93) |
| Garissa          | 1995        | 0.84<br>(0.73–0.96) |
| Garissa          | 1996        | 0.85<br>(0.74–0.97) |
| Garissa          | 1997        | 0.85<br>(0.74–0.97) |
| Garissa          | 1998        | 0.85<br>(0.75–0.97) |
| Garissa          | 1999        | 0.84<br>(0.75–0.95) |
| Garissa          | 2000        | 0.84<br>(0.75–0.94) |
| Garissa          | 2001        | 0.84<br>(0.75–0.95) |
| Garissa          | 2002        | 0.83<br>(0.74–0.94) |
| Garissa          | 2003        | 0.82<br>(0.72–0.92) |
| Garissa          | 2004        | 0.8<br>(0.71–0.91)  |
| Garissa          | 2005        | 0.79<br>(0.7–0.89)  |
| Garissa          | 2006        | 0.78<br>(0.7–0.88)  |
| Garissa          | 2007        | 0.77<br>(0.69–0.87) |
| Garissa          | 2008        | 0.77<br>(0.68–0.87) |
| Garissa          | 2009        | 0.76<br>(0.66–0.87) |
| Garissa          | 2010        | 0.75<br>(0.65–0.87) |

**Table 15 Ratio of adjusted to unadjusted 5q0 values for scaled locations by year**

| <b>Geography</b> | <b>Year</b> | <b>Ratio</b>        |
|------------------|-------------|---------------------|
| Garissa          | 2011        | 0.75<br>(0.64–0.87) |
| Garissa          | 2012        | 0.74<br>(0.64–0.86) |
| Garissa          | 2013        | 0.73<br>(0.63–0.85) |
| Garissa          | 2014        | 0.73<br>(0.64–0.83) |
| Garissa          | 2015        | 0.73<br>(0.66–0.81) |
| Garissa          | 2016        | 0.72<br>(0.68–0.77) |
| Garissa          | 2017        | 0.71<br>(0.71–0.72) |
| HomaBay          | 1950        | 0.77<br>(0.71–0.83) |
| HomaBay          | 1951        | 0.77<br>(0.7–0.84)  |
| HomaBay          | 1952        | 0.77<br>(0.7–0.84)  |
| HomaBay          | 1953        | 0.77<br>(0.69–0.84) |
| HomaBay          | 1954        | 0.76<br>(0.68–0.84) |
| HomaBay          | 1955        | 0.75<br>(0.67–0.84) |
| HomaBay          | 1956        | 0.75<br>(0.67–0.84) |
| HomaBay          | 1957        | 0.75<br>(0.67–0.83) |
| HomaBay          | 1958        | 0.74<br>(0.67–0.83) |
| HomaBay          | 1959        | 0.74<br>(0.67–0.82) |
| HomaBay          | 1960        | 0.75<br>(0.68–0.81) |
| HomaBay          | 1961        | 0.75<br>(0.68–0.82) |
| HomaBay          | 1962        | 0.75<br>(0.68–0.82) |
| HomaBay          | 1963        | 0.76<br>(0.68–0.83) |
| HomaBay          | 1964        | 0.77<br>(0.69–0.84) |
| HomaBay          | 1965        | 0.77<br>(0.7–0.85)  |
| HomaBay          | 1966        | 0.78<br>(0.71–0.86) |
| HomaBay          | 1967        | 0.8<br>(0.72–0.87)  |
| HomaBay          | 1968        | 0.81<br>(0.74–0.89) |
| HomaBay          | 1969        | 0.82<br>(0.75–0.89) |
| HomaBay          | 1970        | 0.83<br>(0.77–0.91) |
| HomaBay          | 1971        | 0.85<br>(0.78–0.92) |
| HomaBay          | 1972        | 0.86<br>(0.79–0.94) |
| HomaBay          | 1973        | 0.87<br>(0.8–0.95)  |

**Table 15 Ratio of adjusted to unadjusted 5q0 values for scaled locations by year**

| <b>Geography</b> | <b>Year</b> | <b>Ratio</b>        |
|------------------|-------------|---------------------|
| HomaBay          | 1974        | 0.88<br>(0.81–0.96) |
| HomaBay          | 1975        | 0.9<br>(0.81–0.98)  |
| HomaBay          | 1976        | 0.91<br>(0.82–1.0)  |
| HomaBay          | 1977        | 0.92<br>(0.83–1.01) |
| HomaBay          | 1978        | 0.93<br>(0.84–1.01) |
| HomaBay          | 1979        | 0.93<br>(0.85–1.01) |
| HomaBay          | 1980        | 0.93<br>(0.85–1.01) |
| HomaBay          | 1981        | 0.93<br>(0.86–1.01) |
| HomaBay          | 1982        | 0.93<br>(0.86–1.02) |
| HomaBay          | 1983        | 0.93<br>(0.85–1.01) |
| HomaBay          | 1984        | 0.93<br>(0.85–1.0)  |
| HomaBay          | 1985        | 0.92<br>(0.84–0.99) |
| HomaBay          | 1986        | 0.91<br>(0.85–0.98) |
| HomaBay          | 1987        | 0.91<br>(0.85–0.97) |
| HomaBay          | 1988        | 0.91<br>(0.85–0.97) |
| HomaBay          | 1989        | 0.91<br>(0.85–0.97) |
| HomaBay          | 1990        | 0.91<br>(0.85–0.97) |
| HomaBay          | 1991        | 0.92<br>(0.85–0.98) |
| HomaBay          | 1992        | 0.92<br>(0.86–0.99) |
| HomaBay          | 1993        | 0.93<br>(0.87–1.0)  |
| HomaBay          | 1994        | 0.94<br>(0.88–1.02) |
| HomaBay          | 1995        | 0.95<br>(0.88–1.03) |
| HomaBay          | 1996        | 0.96<br>(0.88–1.05) |
| HomaBay          | 1997        | 0.96<br>(0.88–1.05) |
| HomaBay          | 1998        | 0.96<br>(0.88–1.04) |
| HomaBay          | 1999        | 0.96<br>(0.89–1.03) |
| HomaBay          | 2000        | 0.96<br>(0.89–1.03) |
| HomaBay          | 2001        | 0.95<br>(0.88–1.03) |
| HomaBay          | 2002        | 0.94<br>(0.86–1.03) |
| HomaBay          | 2003        | 0.93<br>(0.85–1.02) |
| HomaBay          | 2004        | 0.92<br>(0.84–1.01) |

**Table 15 Ratio of adjusted to unadjusted 5q0 values for scaled locations by year**

| <b>Geography</b> | <b>Year</b> | <b>Ratio</b>        |
|------------------|-------------|---------------------|
| HomaBay          | 2005        | 0.91<br>(0.84–1.01) |
| HomaBay          | 2006        | 0.91<br>(0.83–0.99) |
| HomaBay          | 2007        | 0.91<br>(0.83–0.97) |
| HomaBay          | 2008        | 0.91<br>(0.83–0.99) |
| HomaBay          | 2009        | 0.91<br>(0.82–1.01) |
| HomaBay          | 2010        | 0.9<br>(0.8–1.02)   |
| HomaBay          | 2011        | 0.9<br>(0.79–1.02)  |
| HomaBay          | 2012        | 0.9<br>(0.79–1.03)  |
| HomaBay          | 2013        | 0.89<br>(0.78–1.02) |
| HomaBay          | 2014        | 0.89<br>(0.78–1.01) |
| HomaBay          | 2015        | 0.89<br>(0.78–1.01) |
| HomaBay          | 2016        | 0.88<br>(0.78–1.0)  |
| HomaBay          | 2017        | 0.88<br>(0.77–1.01) |
| Isiolo           | 1950        | 0.61<br>(0.59–0.62) |
| Isiolo           | 1951        | 0.62<br>(0.59–0.64) |
| Isiolo           | 1952        | 0.63<br>(0.59–0.67) |
| Isiolo           | 1953        | 0.63<br>(0.58–0.68) |
| Isiolo           | 1954        | 0.64<br>(0.58–0.69) |
| Isiolo           | 1955        | 0.65<br>(0.59–0.71) |
| Isiolo           | 1956        | 0.65<br>(0.58–0.72) |
| Isiolo           | 1957        | 0.65<br>(0.58–0.73) |
| Isiolo           | 1958        | 0.66<br>(0.59–0.73) |
| Isiolo           | 1959        | 0.66<br>(0.59–0.73) |
| Isiolo           | 1960        | 0.66<br>(0.59–0.75) |
| Isiolo           | 1961        | 0.67<br>(0.59–0.75) |
| Isiolo           | 1962        | 0.68<br>(0.61–0.74) |
| Isiolo           | 1963        | 0.68<br>(0.62–0.75) |
| Isiolo           | 1964        | 0.69<br>(0.63–0.77) |
| Isiolo           | 1965        | 0.71<br>(0.64–0.78) |
| Isiolo           | 1966        | 0.72<br>(0.66–0.79) |
| Isiolo           | 1967        | 0.73<br>(0.67–0.8)  |

**Table 15 Ratio of adjusted to unadjusted 5q0 values for scaled locations by year**

| <b>Geography</b> | <b>Year</b> | <b>Ratio</b>        |
|------------------|-------------|---------------------|
| Isiolo           | 1968        | 0.75<br>(0.68–0.83) |
| Isiolo           | 1969        | 0.76<br>(0.69–0.84) |
| Isiolo           | 1970        | 0.78<br>(0.71–0.85) |
| Isiolo           | 1971        | 0.79<br>(0.73–0.85) |
| Isiolo           | 1972        | 0.8<br>(0.74–0.86)  |
| Isiolo           | 1973        | 0.81<br>(0.75–0.88) |
| Isiolo           | 1974        | 0.82<br>(0.76–0.89) |
| Isiolo           | 1975        | 0.83<br>(0.77–0.9)  |
| Isiolo           | 1976        | 0.84<br>(0.77–0.91) |
| Isiolo           | 1977        | 0.84<br>(0.77–0.92) |
| Isiolo           | 1978        | 0.85<br>(0.78–0.92) |
| Isiolo           | 1979        | 0.86<br>(0.79–0.94) |
| Isiolo           | 1980        | 0.87<br>(0.8–0.95)  |
| Isiolo           | 1981        | 0.88<br>(0.8–0.96)  |
| Isiolo           | 1982        | 0.89<br>(0.81–0.97) |
| Isiolo           | 1983        | 0.9<br>(0.81–0.98)  |
| Isiolo           | 1984        | 0.9<br>(0.81–0.99)  |
| Isiolo           | 1985        | 0.9<br>(0.81–1.0)   |
| Isiolo           | 1986        | 0.91<br>(0.81–1.0)  |
| Isiolo           | 1987        | 0.91<br>(0.82–1.0)  |
| Isiolo           | 1988        | 0.92<br>(0.84–1.0)  |
| Isiolo           | 1989        | 0.92<br>(0.85–1.0)  |
| Isiolo           | 1990        | 0.93<br>(0.86–1.0)  |
| Isiolo           | 1991        | 0.94<br>(0.86–1.01) |
| Isiolo           | 1992        | 0.94<br>(0.86–1.03) |
| Isiolo           | 1993        | 0.95<br>(0.86–1.05) |
| Isiolo           | 1994        | 0.95<br>(0.86–1.05) |
| Isiolo           | 1995        | 0.95<br>(0.86–1.04) |
| Isiolo           | 1996        | 0.95<br>(0.86–1.04) |
| Isiolo           | 1997        | 0.95<br>(0.87–1.04) |
| Isiolo           | 1998        | 0.95<br>(0.88–1.03) |

**Table 15 Ratio of adjusted to unadjusted 5q0 values for scaled locations by year**

| <b>Geography</b> | <b>Year</b> | <b>Ratio</b>        |
|------------------|-------------|---------------------|
| Isiolo           | 1999        | 0.95<br>(0.88–1.03) |
| Isiolo           | 2000        | 0.95<br>(0.87–1.03) |
| Isiolo           | 2001        | 0.94<br>(0.85–1.04) |
| Isiolo           | 2002        | 0.94<br>(0.84–1.04) |
| Isiolo           | 2003        | 0.94<br>(0.84–1.04) |
| Isiolo           | 2004        | 0.93<br>(0.84–1.04) |
| Isiolo           | 2005        | 0.93<br>(0.83–1.03) |
| Isiolo           | 2006        | 0.92<br>(0.84–1.01) |
| Isiolo           | 2007        | 0.93<br>(0.85–1.01) |
| Isiolo           | 2008        | 0.94<br>(0.85–1.04) |
| Isiolo           | 2009        | 0.95<br>(0.85–1.07) |
| Isiolo           | 2010        | 0.96<br>(0.84–1.09) |
| Isiolo           | 2011        | 0.96<br>(0.84–1.09) |
| Isiolo           | 2012        | 0.97<br>(0.85–1.12) |
| Isiolo           | 2013        | 0.99<br>(0.86–1.13) |
| Isiolo           | 2014        | 1.0<br>(0.88–1.12)  |
| Isiolo           | 2015        | 1.0<br>(0.91–1.1)   |
| Isiolo           | 2016        | 1.0<br>(0.94–1.06)  |
| Isiolo           | 2017        | 1.0<br>(0.96–1.03)  |
| Kajiado          | 1950        | 0.28<br>(0.27–0.28) |
| Kajiado          | 1951        | 0.28<br>(0.26–0.29) |
| Kajiado          | 1952        | 0.28<br>(0.26–0.3)  |
| Kajiado          | 1953        | 0.28<br>(0.26–0.31) |
| Kajiado          | 1954        | 0.29<br>(0.26–0.31) |
| Kajiado          | 1955        | 0.29<br>(0.27–0.32) |
| Kajiado          | 1956        | 0.3<br>(0.27–0.33)  |
| Kajiado          | 1957        | 0.3<br>(0.27–0.34)  |
| Kajiado          | 1958        | 0.31<br>(0.27–0.35) |
| Kajiado          | 1959        | 0.31<br>(0.27–0.36) |
| Kajiado          | 1960        | 0.32<br>(0.27–0.36) |
| Kajiado          | 1961        | 0.32<br>(0.28–0.37) |

**Table 15 Ratio of adjusted to unadjusted 5q0 values for scaled locations by year**

| <b>Geography</b> | <b>Year</b> | <b>Ratio</b>        |
|------------------|-------------|---------------------|
| Kajiado          | 1962        | 0.33<br>(0.29–0.37) |
| Kajiado          | 1963        | 0.34<br>(0.3–0.38)  |
| Kajiado          | 1964        | 0.35<br>(0.31–0.39) |
| Kajiado          | 1965        | 0.36<br>(0.32–0.4)  |
| Kajiado          | 1966        | 0.38<br>(0.33–0.43) |
| Kajiado          | 1967        | 0.4<br>(0.35–0.45)  |
| Kajiado          | 1968        | 0.42<br>(0.37–0.48) |
| Kajiado          | 1969        | 0.45<br>(0.4–0.5)   |
| Kajiado          | 1970        | 0.47<br>(0.42–0.53) |
| Kajiado          | 1971        | 0.5<br>(0.45–0.55)  |
| Kajiado          | 1972        | 0.53<br>(0.48–0.58) |
| Kajiado          | 1973        | 0.55<br>(0.5–0.61)  |
| Kajiado          | 1974        | 0.58<br>(0.52–0.64) |
| Kajiado          | 1975        | 0.6<br>(0.54–0.67)  |
| Kajiado          | 1976        | 0.63<br>(0.56–0.7)  |
| Kajiado          | 1977        | 0.66<br>(0.57–0.74) |
| Kajiado          | 1978        | 0.68<br>(0.59–0.78) |
| Kajiado          | 1979        | 0.7<br>(0.61–0.81)  |
| Kajiado          | 1980        | 0.72<br>(0.62–0.83) |
| Kajiado          | 1981        | 0.74<br>(0.63–0.85) |
| Kajiado          | 1982        | 0.75<br>(0.65–0.86) |
| Kajiado          | 1983        | 0.77<br>(0.67–0.87) |
| Kajiado          | 1984        | 0.78<br>(0.69–0.87) |
| Kajiado          | 1985        | 0.79<br>(0.71–0.88) |
| Kajiado          | 1986        | 0.8<br>(0.73–0.87)  |
| Kajiado          | 1987        | 0.81<br>(0.73–0.89) |
| Kajiado          | 1988        | 0.82<br>(0.74–0.91) |
| Kajiado          | 1989        | 0.84<br>(0.74–0.94) |
| Kajiado          | 1990        | 0.86<br>(0.75–0.97) |
| Kajiado          | 1991        | 0.87<br>(0.76–0.99) |
| Kajiado          | 1992        | 0.9<br>(0.78–1.01)  |

**Table 15 Ratio of adjusted to unadjusted 5q0 values for scaled locations by year**

| <b>Geography</b> | <b>Year</b> | <b>Ratio</b>        |
|------------------|-------------|---------------------|
| Kajiado          | 1993        | 0.92<br>(0.81–1.02) |
| Kajiado          | 1994        | 0.94<br>(0.84–1.03) |
| Kajiado          | 1995        | 0.96<br>(0.87–1.05) |
| Kajiado          | 1996        | 0.97<br>(0.88–1.06) |
| Kajiado          | 1997        | 0.98<br>(0.88–1.09) |
| Kajiado          | 1998        | 0.99<br>(0.87–1.11) |
| Kajiado          | 1999        | 0.99<br>(0.86–1.13) |
| Kajiado          | 2000        | 0.99<br>(0.85–1.13) |
| Kajiado          | 2001        | 0.99<br>(0.86–1.14) |
| Kajiado          | 2002        | 0.99<br>(0.86–1.13) |
| Kajiado          | 2003        | 0.98<br>(0.86–1.12) |
| Kajiado          | 2004        | 0.98<br>(0.86–1.1)  |
| Kajiado          | 2005        | 0.98<br>(0.87–1.1)  |
| Kajiado          | 2006        | 0.98<br>(0.87–1.1)  |
| Kajiado          | 2007        | 0.97<br>(0.86–1.11) |
| Kajiado          | 2008        | 0.98<br>(0.85–1.13) |
| Kajiado          | 2009        | 0.99<br>(0.85–1.13) |
| Kajiado          | 2010        | 0.99<br>(0.85–1.12) |
| Kajiado          | 2011        | 0.98<br>(0.85–1.12) |
| Kajiado          | 2012        | 0.98<br>(0.85–1.13) |
| Kajiado          | 2013        | 0.99<br>(0.86–1.13) |
| Kajiado          | 2014        | 1.0<br>(0.89–1.11)  |
| Kajiado          | 2015        | 1.0<br>(0.91–1.09)  |
| Kajiado          | 2016        | 1.01<br>(0.95–1.07) |
| Kajiado          | 2017        | 1.0<br>(0.99–1.02)  |
| Kakamega         | 1950        | 0.8<br>(0.79–0.81)  |
| Kakamega         | 1951        | 0.82<br>(0.78–0.85) |
| Kakamega         | 1952        | 0.82<br>(0.77–0.88) |
| Kakamega         | 1953        | 0.82<br>(0.76–0.89) |
| Kakamega         | 1954        | 0.82<br>(0.74–0.9)  |
| Kakamega         | 1955        | 0.82<br>(0.73–0.92) |



**Table 15 Ratio of adjusted to unadjusted 5q0 values for scaled locations by year**

| <b>Geography</b> | <b>Year</b> | <b>Ratio</b>        |
|------------------|-------------|---------------------|
| Kakamega         | 1956        | 0.82<br>(0.72–0.93) |
| Kakamega         | 1957        | 0.81<br>(0.71–0.92) |
| Kakamega         | 1958        | 0.81<br>(0.71–0.91) |
| Kakamega         | 1959        | 0.81<br>(0.71–0.91) |
| Kakamega         | 1960        | 0.81<br>(0.71–0.91) |
| Kakamega         | 1961        | 0.81<br>(0.71–0.9)  |
| Kakamega         | 1962        | 0.81<br>(0.72–0.9)  |
| Kakamega         | 1963        | 0.81<br>(0.73–0.9)  |
| Kakamega         | 1964        | 0.82<br>(0.73–0.91) |
| Kakamega         | 1965        | 0.83<br>(0.74–0.92) |
| Kakamega         | 1966        | 0.84<br>(0.76–0.92) |
| Kakamega         | 1967        | 0.85<br>(0.77–0.94) |
| Kakamega         | 1968        | 0.86<br>(0.78–0.95) |
| Kakamega         | 1969        | 0.87<br>(0.79–0.97) |
| Kakamega         | 1970        | 0.89<br>(0.81–0.97) |
| Kakamega         | 1971        | 0.91<br>(0.83–0.99) |
| Kakamega         | 1972        | 0.92<br>(0.84–1.01) |
| Kakamega         | 1973        | 0.94<br>(0.85–1.03) |
| Kakamega         | 1974        | 0.95<br>(0.85–1.05) |
| Kakamega         | 1975        | 0.96<br>(0.84–1.08) |
| Kakamega         | 1976        | 0.97<br>(0.84–1.11) |
| Kakamega         | 1977        | 0.98<br>(0.83–1.14) |
| Kakamega         | 1978        | 0.98<br>(0.83–1.15) |
| Kakamega         | 1979        | 0.99<br>(0.84–1.15) |
| Kakamega         | 1980        | 0.99<br>(0.85–1.14) |
| Kakamega         | 1981        | 1.0<br>(0.86–1.15)  |
| Kakamega         | 1982        | 1.0<br>(0.87–1.14)  |
| Kakamega         | 1983        | 1.0<br>(0.9–1.12)   |
| Kakamega         | 1984        | 1.0<br>(0.91–1.1)   |
| Kakamega         | 1985        | 1.0<br>(0.92–1.08)  |
| Kakamega         | 1986        | 1.0<br>(0.93–1.08)  |

**Table 15 Ratio of adjusted to unadjusted 5q0 values for scaled locations by year**

| <b>Geography</b> | <b>Year</b> | <b>Ratio</b>        |
|------------------|-------------|---------------------|
| Kakamega         | 1987        | 1.0<br>(0.93–1.08)  |
| Kakamega         | 1988        | 1.01<br>(0.94–1.08) |
| Kakamega         | 1989        | 1.01<br>(0.95–1.09) |
| Kakamega         | 1990        | 1.03<br>(0.97–1.09) |
| Kakamega         | 1991        | 1.04<br>(0.99–1.1)  |
| Kakamega         | 1992        | 1.06<br>(0.99–1.14) |
| Kakamega         | 1993        | 1.08<br>(0.99–1.17) |
| Kakamega         | 1994        | 1.1<br>(1.0–1.2)    |
| Kakamega         | 1995        | 1.11<br>(1.01–1.24) |
| Kakamega         | 1996        | 1.12<br>(1.01–1.24) |
| Kakamega         | 1997        | 1.12<br>(1.01–1.23) |
| Kakamega         | 1998        | 1.12<br>(1.01–1.22) |
| Kakamega         | 1999        | 1.11<br>(1.01–1.23) |
| Kakamega         | 2000        | 1.11<br>(1.0–1.23)  |
| Kakamega         | 2001        | 1.1<br>(0.98–1.24)  |
| Kakamega         | 2002        | 1.1<br>(0.97–1.24)  |
| Kakamega         | 2003        | 1.1<br>(0.97–1.24)  |
| Kakamega         | 2004        | 1.1<br>(0.98–1.23)  |
| Kakamega         | 2005        | 1.1<br>(0.99–1.22)  |
| Kakamega         | 2006        | 1.11<br>(1.0–1.22)  |
| Kakamega         | 2007        | 1.13<br>(1.03–1.23) |
| Kakamega         | 2008        | 1.14<br>(1.03–1.25) |
| Kakamega         | 2009        | 1.14<br>(1.01–1.27) |
| Kakamega         | 2010        | 1.13<br>(1.0–1.27)  |
| Kakamega         | 2011        | 1.13<br>(0.99–1.27) |
| Kakamega         | 2012        | 1.13<br>(1.0–1.26)  |
| Kakamega         | 2013        | 1.12<br>(1.01–1.25) |
| Kakamega         | 2014        | 1.13<br>(1.03–1.24) |
| Kakamega         | 2015        | 1.12<br>(1.04–1.2)  |
| Kakamega         | 2016        | 1.12<br>(1.07–1.17) |
| Kakamega         | 2017        | 1.11<br>(1.09–1.14) |

**Table 15 Ratio of adjusted to unadjusted 5q0 values for scaled locations by year**

| <b>Geography</b> | <b>Year</b> | <b>Ratio</b>        |
|------------------|-------------|---------------------|
| Kericho          | 1950        | 0.27<br>(0.26–0.27) |
| Kericho          | 1951        | 0.27<br>(0.26–0.29) |
| Kericho          | 1952        | 0.28<br>(0.26–0.3)  |
| Kericho          | 1953        | 0.28<br>(0.26–0.3)  |
| Kericho          | 1954        | 0.28<br>(0.26–0.31) |
| Kericho          | 1955        | 0.29<br>(0.26–0.32) |
| Kericho          | 1956        | 0.29<br>(0.26–0.33) |
| Kericho          | 1957        | 0.3<br>(0.26–0.34)  |
| Kericho          | 1958        | 0.3<br>(0.26–0.34)  |
| Kericho          | 1959        | 0.31<br>(0.27–0.35) |
| Kericho          | 1960        | 0.31<br>(0.27–0.35) |
| Kericho          | 1961        | 0.32<br>(0.28–0.36) |
| Kericho          | 1962        | 0.32<br>(0.29–0.36) |
| Kericho          | 1963        | 0.33<br>(0.3–0.37)  |
| Kericho          | 1964        | 0.34<br>(0.31–0.38) |
| Kericho          | 1965        | 0.36<br>(0.31–0.4)  |
| Kericho          | 1966        | 0.37<br>(0.33–0.42) |
| Kericho          | 1967        | 0.39<br>(0.35–0.45) |
| Kericho          | 1968        | 0.42<br>(0.37–0.48) |
| Kericho          | 1969        | 0.44<br>(0.39–0.5)  |
| Kericho          | 1970        | 0.47<br>(0.42–0.53) |
| Kericho          | 1971        | 0.5<br>(0.45–0.55)  |
| Kericho          | 1972        | 0.52<br>(0.48–0.57) |
| Kericho          | 1973        | 0.55<br>(0.5–0.61)  |
| Kericho          | 1974        | 0.58<br>(0.52–0.64) |
| Kericho          | 1975        | 0.6<br>(0.54–0.67)  |
| Kericho          | 1976        | 0.63<br>(0.56–0.7)  |
| Kericho          | 1977        | 0.65<br>(0.57–0.73) |
| Kericho          | 1978        | 0.68<br>(0.59–0.77) |
| Kericho          | 1979        | 0.7<br>(0.61–0.81)  |
| Kericho          | 1980        | 0.72<br>(0.62–0.83) |

**Table 15 Ratio of adjusted to unadjusted 5q0 values for scaled locations by year**

| <b>Geography</b> | <b>Year</b> | <b>Ratio</b>        |
|------------------|-------------|---------------------|
| Kericho          | 1981        | 0.74<br>(0.63–0.85) |
| Kericho          | 1982        | 0.75<br>(0.66–0.86) |
| Kericho          | 1983        | 0.77<br>(0.67–0.87) |
| Kericho          | 1984        | 0.78<br>(0.69–0.88) |
| Kericho          | 1985        | 0.79<br>(0.71–0.88) |
| Kericho          | 1986        | 0.8<br>(0.73–0.88)  |
| Kericho          | 1987        | 0.81<br>(0.73–0.89) |
| Kericho          | 1988        | 0.82<br>(0.74–0.91) |
| Kericho          | 1989        | 0.84<br>(0.74–0.94) |
| Kericho          | 1990        | 0.86<br>(0.75–0.97) |
| Kericho          | 1991        | 0.87<br>(0.76–0.99) |
| Kericho          | 1992        | 0.89<br>(0.78–1.01) |
| Kericho          | 1993        | 0.92<br>(0.81–1.02) |
| Kericho          | 1994        | 0.94<br>(0.84–1.03) |
| Kericho          | 1995        | 0.96<br>(0.87–1.06) |
| Kericho          | 1996        | 0.97<br>(0.88–1.07) |
| Kericho          | 1997        | 0.98<br>(0.88–1.09) |
| Kericho          | 1998        | 0.99<br>(0.87–1.11) |
| Kericho          | 1999        | 0.99<br>(0.86–1.13) |
| Kericho          | 2000        | 0.99<br>(0.85–1.13) |
| Kericho          | 2001        | 0.99<br>(0.86–1.15) |
| Kericho          | 2002        | 0.99<br>(0.85–1.13) |
| Kericho          | 2003        | 0.98<br>(0.85–1.12) |
| Kericho          | 2004        | 0.98<br>(0.86–1.1)  |
| Kericho          | 2005        | 0.98<br>(0.87–1.1)  |
| Kericho          | 2006        | 0.98<br>(0.87–1.1)  |
| Kericho          | 2007        | 0.97<br>(0.86–1.11) |
| Kericho          | 2008        | 0.98<br>(0.85–1.13) |
| Kericho          | 2009        | 0.99<br>(0.85–1.13) |
| Kericho          | 2010        | 0.99<br>(0.85–1.12) |
| Kericho          | 2011        | 0.98<br>(0.85–1.12) |

**Table 15 Ratio of adjusted to unadjusted 5q0 values for scaled locations by year**

| <b>Geography</b> | <b>Year</b> | <b>Ratio</b>        |
|------------------|-------------|---------------------|
| Kericho          | 2012        | 0.98<br>(0.85–1.13) |
| Kericho          | 2013        | 0.99<br>(0.86–1.13) |
| Kericho          | 2014        | 1.0<br>(0.89–1.11)  |
| Kericho          | 2015        | 1.0<br>(0.91–1.09)  |
| Kericho          | 2016        | 1.01<br>(0.95–1.07) |
| Kericho          | 2017        | 1.0<br>(0.99–1.02)  |
| Kiambu           | 1950        | 0.44<br>(0.44–0.45) |
| Kiambu           | 1951        | 0.45<br>(0.43–0.47) |
| Kiambu           | 1952        | 0.46<br>(0.43–0.49) |
| Kiambu           | 1953        | 0.47<br>(0.44–0.5)  |
| Kiambu           | 1954        | 0.47<br>(0.44–0.51) |
| Kiambu           | 1955        | 0.48<br>(0.45–0.52) |
| Kiambu           | 1956        | 0.49<br>(0.45–0.54) |
| Kiambu           | 1957        | 0.5<br>(0.44–0.56)  |
| Kiambu           | 1958        | 0.51<br>(0.44–0.58) |
| Kiambu           | 1959        | 0.52<br>(0.45–0.59) |
| Kiambu           | 1960        | 0.52<br>(0.46–0.6)  |
| Kiambu           | 1961        | 0.53<br>(0.47–0.6)  |
| Kiambu           | 1962        | 0.54<br>(0.48–0.61) |
| Kiambu           | 1963        | 0.56<br>(0.5–0.63)  |
| Kiambu           | 1964        | 0.57<br>(0.5–0.65)  |
| Kiambu           | 1965        | 0.6<br>(0.52–0.68)  |
| Kiambu           | 1966        | 0.62<br>(0.54–0.71) |
| Kiambu           | 1967        | 0.65<br>(0.57–0.74) |
| Kiambu           | 1968        | 0.68<br>(0.6–0.78)  |
| Kiambu           | 1969        | 0.71<br>(0.62–0.81) |
| Kiambu           | 1970        | 0.75<br>(0.65–0.85) |
| Kiambu           | 1971        | 0.78<br>(0.69–0.87) |
| Kiambu           | 1972        | 0.8<br>(0.72–0.88)  |
| Kiambu           | 1973        | 0.83<br>(0.76–0.9)  |
| Kiambu           | 1974        | 0.85<br>(0.78–0.92) |

**Table 15 Ratio of adjusted to unadjusted 5q0 values for scaled locations by year**

| <b>Geography</b> | <b>Year</b> | <b>Ratio</b>        |
|------------------|-------------|---------------------|
| Kiambu           | 1975        | 0.87<br>(0.8–0.95)  |
| Kiambu           | 1976        | 0.88<br>(0.79–0.97) |
| Kiambu           | 1977        | 0.88<br>(0.79–0.98) |
| Kiambu           | 1978        | 0.88<br>(0.79–0.98) |
| Kiambu           | 1979        | 0.89<br>(0.8–0.99)  |
| Kiambu           | 1980        | 0.89<br>(0.8–0.99)  |
| Kiambu           | 1981        | 0.88<br>(0.8–0.96)  |
| Kiambu           | 1982        | 0.87<br>(0.8–0.95)  |
| Kiambu           | 1983        | 0.88<br>(0.8–0.97)  |
| Kiambu           | 1984        | 0.88<br>(0.79–0.99) |
| Kiambu           | 1985        | 0.89<br>(0.79–1.01) |
| Kiambu           | 1986        | 0.9<br>(0.78–1.04)  |
| Kiambu           | 1987        | 0.91<br>(0.78–1.06) |
| Kiambu           | 1988        | 0.92<br>(0.79–1.07) |
| Kiambu           | 1989        | 0.93<br>(0.79–1.1)  |
| Kiambu           | 1990        | 0.94<br>(0.8–1.09)  |
| Kiambu           | 1991        | 0.95<br>(0.81–1.08) |
| Kiambu           | 1992        | 0.96<br>(0.85–1.07) |
| Kiambu           | 1993        | 0.97<br>(0.86–1.09) |
| Kiambu           | 1994        | 0.98<br>(0.88–1.1)  |
| Kiambu           | 1995        | 0.98<br>(0.87–1.1)  |
| Kiambu           | 1996        | 0.98<br>(0.86–1.11) |
| Kiambu           | 1997        | 0.99<br>(0.85–1.14) |
| Kiambu           | 1998        | 0.99<br>(0.84–1.16) |
| Kiambu           | 1999        | 0.99<br>(0.83–1.17) |
| Kiambu           | 2000        | 0.99<br>(0.83–1.18) |
| Kiambu           | 2001        | 0.98<br>(0.83–1.15) |
| Kiambu           | 2002        | 0.96<br>(0.83–1.12) |
| Kiambu           | 2003        | 0.95<br>(0.83–1.09) |
| Kiambu           | 2004        | 0.93<br>(0.83–1.05) |
| Kiambu           | 2005        | 0.92<br>(0.82–1.03) |

**Table 15 Ratio of adjusted to unadjusted 5q0 values for scaled locations by year**

| <b>Geography</b> | <b>Year</b> | <b>Ratio</b>        |
|------------------|-------------|---------------------|
| Kiambu           | 2006        | 0.91<br>(0.8–1.03)  |
| Kiambu           | 2007        | 0.91<br>(0.78–1.06) |
| Kiambu           | 2008        | 0.92<br>(0.77–1.09) |
| Kiambu           | 2009        | 0.93<br>(0.77–1.11) |
| Kiambu           | 2010        | 0.93<br>(0.78–1.11) |
| Kiambu           | 2011        | 0.94<br>(0.79–1.1)  |
| Kiambu           | 2012        | 0.93<br>(0.8–1.08)  |
| Kiambu           | 2013        | 0.92<br>(0.81–1.06) |
| Kiambu           | 2014        | 0.92<br>(0.82–1.02) |
| Kiambu           | 2015        | 0.92<br>(0.84–1.02) |
| Kiambu           | 2016        | 0.93<br>(0.87–0.99) |
| Kiambu           | 2017        | 0.93<br>(0.91–0.94) |
| Kilifi           | 1950        | 0.93<br>(0.92–0.94) |
| Kilifi           | 1951        | 0.93<br>(0.89–0.97) |
| Kilifi           | 1952        | 0.92<br>(0.87–0.99) |
| Kilifi           | 1953        | 0.91<br>(0.85–0.98) |
| Kilifi           | 1954        | 0.9<br>(0.84–0.97)  |
| Kilifi           | 1955        | 0.9<br>(0.83–0.98)  |
| Kilifi           | 1956        | 0.91<br>(0.82–1.0)  |
| Kilifi           | 1957        | 0.91<br>(0.82–1.01) |
| Kilifi           | 1958        | 0.91<br>(0.82–1.02) |
| Kilifi           | 1959        | 0.91<br>(0.81–1.02) |
| Kilifi           | 1960        | 0.92<br>(0.82–1.03) |
| Kilifi           | 1961        | 0.92<br>(0.82–1.03) |
| Kilifi           | 1962        | 0.93<br>(0.82–1.04) |
| Kilifi           | 1963        | 0.94<br>(0.83–1.06) |
| Kilifi           | 1964        | 0.95<br>(0.84–1.07) |
| Kilifi           | 1965        | 0.96<br>(0.84–1.08) |
| Kilifi           | 1966        | 0.97<br>(0.86–1.1)  |
| Kilifi           | 1967        | 0.98<br>(0.86–1.11) |
| Kilifi           | 1968        | 0.98<br>(0.88–1.11) |

**Table 15 Ratio of adjusted to unadjusted 5q0 values for scaled locations by year**

| <b>Geography</b> | <b>Year</b> | <b>Ratio</b>        |
|------------------|-------------|---------------------|
| Kilifi           | 1969        | 0.99<br>(0.89–1.11) |
| Kilifi           | 1970        | 1.0<br>(0.9–1.11)   |
| Kilifi           | 1971        | 1.01<br>(0.9–1.12)  |
| Kilifi           | 1972        | 1.01<br>(0.9–1.12)  |
| Kilifi           | 1973        | 1.0<br>(0.9–1.11)   |
| Kilifi           | 1974        | 0.99<br>(0.9–1.09)  |
| Kilifi           | 1975        | 0.99<br>(0.89–1.09) |
| Kilifi           | 1976        | 0.99<br>(0.88–1.09) |
| Kilifi           | 1977        | 0.99<br>(0.88–1.09) |
| Kilifi           | 1978        | 0.99<br>(0.89–1.08) |
| Kilifi           | 1979        | 0.99<br>(0.89–1.09) |
| Kilifi           | 1980        | 0.99<br>(0.89–1.1)  |
| Kilifi           | 1981        | 0.99<br>(0.88–1.11) |
| Kilifi           | 1982        | 0.99<br>(0.88–1.1)  |
| Kilifi           | 1983        | 1.0<br>(0.88–1.11)  |
| Kilifi           | 1984        | 1.0<br>(0.89–1.12)  |
| Kilifi           | 1985        | 1.0<br>(0.9–1.11)   |
| Kilifi           | 1986        | 1.01<br>(0.91–1.13) |
| Kilifi           | 1987        | 1.02<br>(0.91–1.15) |
| Kilifi           | 1988        | 1.02<br>(0.91–1.15) |
| Kilifi           | 1989        | 1.03<br>(0.92–1.15) |
| Kilifi           | 1990        | 1.03<br>(0.91–1.16) |
| Kilifi           | 1991        | 1.04<br>(0.92–1.17) |
| Kilifi           | 1992        | 1.05<br>(0.93–1.19) |
| Kilifi           | 1993        | 1.06<br>(0.95–1.19) |
| Kilifi           | 1994        | 1.06<br>(0.95–1.19) |
| Kilifi           | 1995        | 1.07<br>(0.97–1.19) |
| Kilifi           | 1996        | 1.07<br>(0.97–1.17) |
| Kilifi           | 1997        | 1.07<br>(0.97–1.17) |
| Kilifi           | 1998        | 1.06<br>(0.98–1.15) |
| Kilifi           | 1999        | 1.06<br>(0.98–1.14) |



**Table 15 Ratio of adjusted to unadjusted 5q0 values for scaled locations by year**

| <b>Geography</b> | <b>Year</b> | <b>Ratio</b>        |
|------------------|-------------|---------------------|
| Kilifi           | 2000        | 1.06<br>(0.97–1.14) |
| Kilifi           | 2001        | 1.06<br>(0.96–1.16) |
| Kilifi           | 2002        | 1.05<br>(0.94–1.16) |
| Kilifi           | 2003        | 1.03<br>(0.92–1.16) |
| Kilifi           | 2004        | 1.02<br>(0.91–1.14) |
| Kilifi           | 2005        | 1.0<br>(0.88–1.14)  |
| Kilifi           | 2006        | 0.99<br>(0.87–1.12) |
| Kilifi           | 2007        | 0.99<br>(0.87–1.13) |
| Kilifi           | 2008        | 1.0<br>(0.86–1.13)  |
| Kilifi           | 2009        | 1.01<br>(0.86–1.17) |
| Kilifi           | 2010        | 1.01<br>(0.87–1.18) |
| Kilifi           | 2011        | 1.01<br>(0.86–1.17) |
| Kilifi           | 2012        | 1.01<br>(0.87–1.16) |
| Kilifi           | 2013        | 1.0<br>(0.87–1.14)  |
| Kilifi           | 2014        | 1.0<br>(0.89–1.1)   |
| Kilifi           | 2015        | 1.0<br>(0.91–1.09)  |
| Kilifi           | 2016        | 1.0<br>(0.94–1.05)  |
| Kilifi           | 2017        | 0.99<br>(0.98–1.0)  |
| Kirinyaga        | 1950        | 0.47<br>(0.46–0.47) |
| Kirinyaga        | 1951        | 0.48<br>(0.46–0.5)  |
| Kirinyaga        | 1952        | 0.48<br>(0.46–0.51) |
| Kirinyaga        | 1953        | 0.49<br>(0.46–0.52) |
| Kirinyaga        | 1954        | 0.5<br>(0.47–0.53)  |
| Kirinyaga        | 1955        | 0.5<br>(0.47–0.54)  |
| Kirinyaga        | 1956        | 0.51<br>(0.47–0.56) |
| Kirinyaga        | 1957        | 0.52<br>(0.46–0.58) |
| Kirinyaga        | 1958        | 0.53<br>(0.46–0.59) |
| Kirinyaga        | 1959        | 0.53<br>(0.46–0.61) |
| Kirinyaga        | 1960        | 0.54<br>(0.48–0.61) |
| Kirinyaga        | 1961        | 0.55<br>(0.49–0.61) |
| Kirinyaga        | 1962        | 0.56<br>(0.5–0.62)  |

**Table 15 Ratio of adjusted to unadjusted 5q0 values for scaled locations by year**

| <b>Geography</b> | <b>Year</b> | <b>Ratio</b>        |
|------------------|-------------|---------------------|
| Kirinyaga        | 1963        | 0.57<br>(0.51–0.64) |
| Kirinyaga        | 1964        | 0.59<br>(0.52–0.66) |
| Kirinyaga        | 1965        | 0.61<br>(0.54–0.69) |
| Kirinyaga        | 1966        | 0.64<br>(0.56–0.72) |
| Kirinyaga        | 1967        | 0.66<br>(0.58–0.75) |
| Kirinyaga        | 1968        | 0.69<br>(0.61–0.79) |
| Kirinyaga        | 1969        | 0.72<br>(0.63–0.82) |
| Kirinyaga        | 1970        | 0.76<br>(0.66–0.85) |
| Kirinyaga        | 1971        | 0.79<br>(0.7–0.88)  |
| Kirinyaga        | 1972        | 0.81<br>(0.74–0.89) |
| Kirinyaga        | 1973        | 0.83<br>(0.77–0.9)  |
| Kirinyaga        | 1974        | 0.85<br>(0.79–0.92) |
| Kirinyaga        | 1975        | 0.88<br>(0.8–0.95)  |
| Kirinyaga        | 1976        | 0.89<br>(0.8–0.97)  |
| Kirinyaga        | 1977        | 0.89<br>(0.8–0.98)  |
| Kirinyaga        | 1978        | 0.89<br>(0.79–0.98) |
| Kirinyaga        | 1979        | 0.89<br>(0.8–0.99)  |
| Kirinyaga        | 1980        | 0.89<br>(0.81–0.99) |
| Kirinyaga        | 1981        | 0.88<br>(0.8–0.96)  |
| Kirinyaga        | 1982        | 0.88<br>(0.8–0.95)  |
| Kirinyaga        | 1983        | 0.88<br>(0.81–0.97) |
| Kirinyaga        | 1984        | 0.88<br>(0.79–0.99) |
| Kirinyaga        | 1985        | 0.89<br>(0.79–1.01) |
| Kirinyaga        | 1986        | 0.9<br>(0.78–1.04)  |
| Kirinyaga        | 1987        | 0.91<br>(0.78–1.06) |
| Kirinyaga        | 1988        | 0.92<br>(0.79–1.07) |
| Kirinyaga        | 1989        | 0.93<br>(0.79–1.1)  |
| Kirinyaga        | 1990        | 0.94<br>(0.8–1.09)  |
| Kirinyaga        | 1991        | 0.95<br>(0.81–1.08) |
| Kirinyaga        | 1992        | 0.96<br>(0.85–1.07) |
| Kirinyaga        | 1993        | 0.97<br>(0.86–1.09) |

**Table 15 Ratio of adjusted to unadjusted 5q0 values for scaled locations by year**

| <b>Geography</b> | <b>Year</b> | <b>Ratio</b>        |
|------------------|-------------|---------------------|
| Kirinyaga        | 1994        | 0.98<br>(0.88–1.1)  |
| Kirinyaga        | 1995        | 0.98<br>(0.87–1.1)  |
| Kirinyaga        | 1996        | 0.98<br>(0.86–1.11) |
| Kirinyaga        | 1997        | 0.99<br>(0.85–1.14) |
| Kirinyaga        | 1998        | 0.99<br>(0.85–1.16) |
| Kirinyaga        | 1999        | 0.99<br>(0.83–1.17) |
| Kirinyaga        | 2000        | 0.99<br>(0.83–1.18) |
| Kirinyaga        | 2001        | 0.98<br>(0.83–1.15) |
| Kirinyaga        | 2002        | 0.96<br>(0.83–1.12) |
| Kirinyaga        | 2003        | 0.95<br>(0.83–1.09) |
| Kirinyaga        | 2004        | 0.93<br>(0.83–1.05) |
| Kirinyaga        | 2005        | 0.92<br>(0.82–1.03) |
| Kirinyaga        | 2006        | 0.92<br>(0.8–1.03)  |
| Kirinyaga        | 2007        | 0.91<br>(0.78–1.06) |
| Kirinyaga        | 2008        | 0.92<br>(0.77–1.09) |
| Kirinyaga        | 2009        | 0.93<br>(0.77–1.11) |
| Kirinyaga        | 2010        | 0.93<br>(0.78–1.11) |
| Kirinyaga        | 2011        | 0.94<br>(0.79–1.1)  |
| Kirinyaga        | 2012        | 0.93<br>(0.8–1.08)  |
| Kirinyaga        | 2013        | 0.92<br>(0.81–1.06) |
| Kirinyaga        | 2014        | 0.92<br>(0.82–1.02) |
| Kirinyaga        | 2015        | 0.92<br>(0.84–1.02) |
| Kirinyaga        | 2016        | 0.93<br>(0.87–0.99) |
| Kirinyaga        | 2017        | 0.93<br>(0.91–0.94) |
| Kisii            | 1950        | 0.74<br>(0.66–0.81) |
| Kisii            | 1951        | 0.74<br>(0.65–0.82) |
| Kisii            | 1952        | 0.74<br>(0.65–0.82) |
| Kisii            | 1953        | 0.73<br>(0.65–0.82) |
| Kisii            | 1954        | 0.72<br>(0.63–0.82) |
| Kisii            | 1955        | 0.72<br>(0.63–0.82) |
| Kisii            | 1956        | 0.72<br>(0.63–0.82) |

**Table 15 Ratio of adjusted to unadjusted 5q0 values for scaled locations by year**

| <b>Geography</b> | <b>Year</b> | <b>Ratio</b>        |
|------------------|-------------|---------------------|
| Kisii            | 1957        | 0.71<br>(0.63–0.81) |
| Kisii            | 1958        | 0.71<br>(0.63–0.8)  |
| Kisii            | 1959        | 0.71<br>(0.63–0.8)  |
| Kisii            | 1960        | 0.71<br>(0.64–0.79) |
| Kisii            | 1961        | 0.72<br>(0.64–0.79) |
| Kisii            | 1962        | 0.72<br>(0.65–0.8)  |
| Kisii            | 1963        | 0.73<br>(0.65–0.81) |
| Kisii            | 1964        | 0.74<br>(0.66–0.82) |
| Kisii            | 1965        | 0.75<br>(0.67–0.83) |
| Kisii            | 1966        | 0.76<br>(0.68–0.85) |
| Kisii            | 1967        | 0.77<br>(0.69–0.86) |
| Kisii            | 1968        | 0.79<br>(0.71–0.87) |
| Kisii            | 1969        | 0.8<br>(0.72–0.88)  |
| Kisii            | 1970        | 0.82<br>(0.74–0.9)  |
| Kisii            | 1971        | 0.83<br>(0.75–0.92) |
| Kisii            | 1972        | 0.84<br>(0.76–0.93) |
| Kisii            | 1973        | 0.86<br>(0.78–0.94) |
| Kisii            | 1974        | 0.87<br>(0.79–0.96) |
| Kisii            | 1975        | 0.89<br>(0.79–0.98) |
| Kisii            | 1976        | 0.9<br>(0.8–1.0)    |
| Kisii            | 1977        | 0.91<br>(0.81–1.01) |
| Kisii            | 1978        | 0.92<br>(0.83–1.01) |
| Kisii            | 1979        | 0.92<br>(0.83–1.01) |
| Kisii            | 1980        | 0.93<br>(0.84–1.01) |
| Kisii            | 1981        | 0.93<br>(0.85–1.01) |
| Kisii            | 1982        | 0.93<br>(0.85–1.02) |
| Kisii            | 1983        | 0.93<br>(0.84–1.01) |
| Kisii            | 1984        | 0.92<br>(0.84–1.0)  |
| Kisii            | 1985        | 0.91<br>(0.83–0.99) |
| Kisii            | 1986        | 0.91<br>(0.84–0.98) |
| Kisii            | 1987        | 0.9<br>(0.84–0.97)  |

**Table 15 Ratio of adjusted to unadjusted 5q0 values for scaled locations by year**

| <b>Geography</b> | <b>Year</b> | <b>Ratio</b>        |
|------------------|-------------|---------------------|
| Kisii            | 1988        | 0.9<br>(0.84–0.97)  |
| Kisii            | 1989        | 0.9<br>(0.84–0.97)  |
| Kisii            | 1990        | 0.91<br>(0.84–0.97) |
| Kisii            | 1991        | 0.91<br>(0.84–0.98) |
| Kisii            | 1992        | 0.92<br>(0.85–0.99) |
| Kisii            | 1993        | 0.93<br>(0.86–1.0)  |
| Kisii            | 1994        | 0.94<br>(0.87–1.02) |
| Kisii            | 1995        | 0.95<br>(0.88–1.03) |
| Kisii            | 1996        | 0.96<br>(0.88–1.05) |
| Kisii            | 1997        | 0.96<br>(0.87–1.05) |
| Kisii            | 1998        | 0.96<br>(0.88–1.05) |
| Kisii            | 1999        | 0.96<br>(0.88–1.03) |
| Kisii            | 2000        | 0.95<br>(0.88–1.03) |
| Kisii            | 2001        | 0.95<br>(0.87–1.04) |
| Kisii            | 2002        | 0.94<br>(0.85–1.03) |
| Kisii            | 2003        | 0.93<br>(0.84–1.02) |
| Kisii            | 2004        | 0.92<br>(0.84–1.01) |
| Kisii            | 2005        | 0.91<br>(0.83–1.01) |
| Kisii            | 2006        | 0.9<br>(0.82–0.99)  |
| Kisii            | 2007        | 0.9<br>(0.83–0.97)  |
| Kisii            | 2008        | 0.9<br>(0.82–0.99)  |
| Kisii            | 2009        | 0.91<br>(0.81–1.01) |
| Kisii            | 2010        | 0.9<br>(0.8–1.02)   |
| Kisii            | 2011        | 0.9<br>(0.78–1.02)  |
| Kisii            | 2012        | 0.9<br>(0.78–1.03)  |
| Kisii            | 2013        | 0.89<br>(0.78–1.02) |
| Kisii            | 2014        | 0.89<br>(0.77–1.01) |
| Kisii            | 2015        | 0.88<br>(0.77–1.01) |
| Kisii            | 2016        | 0.88<br>(0.77–1.0)  |
| Kisii            | 2017        | 0.88<br>(0.76–1.01) |
| Kisumu           | 1950        | 0.75<br>(0.67–0.82) |

**Table 15 Ratio of adjusted to unadjusted 5q0 values for scaled locations by year**

| <b>Geography</b> | <b>Year</b> | <b>Ratio</b>        |
|------------------|-------------|---------------------|
| Kisumu           | 1951        | 0.75<br>(0.66–0.83) |
| Kisumu           | 1952        | 0.75<br>(0.66–0.83) |
| Kisumu           | 1953        | 0.74<br>(0.66–0.83) |
| Kisumu           | 1954        | 0.73<br>(0.64–0.82) |
| Kisumu           | 1955        | 0.73<br>(0.64–0.82) |
| Kisumu           | 1956        | 0.73<br>(0.64–0.82) |
| Kisumu           | 1957        | 0.72<br>(0.64–0.82) |
| Kisumu           | 1958        | 0.72<br>(0.64–0.81) |
| Kisumu           | 1959        | 0.72<br>(0.65–0.8)  |
| Kisumu           | 1960        | 0.72<br>(0.65–0.8)  |
| Kisumu           | 1961        | 0.73<br>(0.65–0.8)  |
| Kisumu           | 1962        | 0.73<br>(0.66–0.81) |
| Kisumu           | 1963        | 0.74<br>(0.66–0.82) |
| Kisumu           | 1964        | 0.75<br>(0.67–0.83) |
| Kisumu           | 1965        | 0.76<br>(0.68–0.84) |
| Kisumu           | 1966        | 0.77<br>(0.69–0.85) |
| Kisumu           | 1967        | 0.78<br>(0.7–0.86)  |
| Kisumu           | 1968        | 0.79<br>(0.72–0.88) |
| Kisumu           | 1969        | 0.81<br>(0.73–0.89) |
| Kisumu           | 1970        | 0.82<br>(0.75–0.9)  |
| Kisumu           | 1971        | 0.84<br>(0.76–0.92) |
| Kisumu           | 1972        | 0.85<br>(0.77–0.93) |
| Kisumu           | 1973        | 0.86<br>(0.79–0.95) |
| Kisumu           | 1974        | 0.88<br>(0.79–0.96) |
| Kisumu           | 1975        | 0.89<br>(0.8–0.98)  |
| Kisumu           | 1976        | 0.9<br>(0.81–1.0)   |
| Kisumu           | 1977        | 0.91<br>(0.81–1.01) |
| Kisumu           | 1978        | 0.92<br>(0.83–1.01) |
| Kisumu           | 1979        | 0.93<br>(0.84–1.01) |
| Kisumu           | 1980        | 0.93<br>(0.85–1.01) |
| Kisumu           | 1981        | 0.93<br>(0.85–1.01) |

**Table 15 Ratio of adjusted to unadjusted 5q0 values for scaled locations by year**

| <b>Geography</b> | <b>Year</b> | <b>Ratio</b>        |
|------------------|-------------|---------------------|
| Kisumu           | 1982        | 0.93<br>(0.85–1.02) |
| Kisumu           | 1983        | 0.93<br>(0.85–1.01) |
| Kisumu           | 1984        | 0.92<br>(0.84–1.0)  |
| Kisumu           | 1985        | 0.91<br>(0.84–0.99) |
| Kisumu           | 1986        | 0.91<br>(0.84–0.98) |
| Kisumu           | 1987        | 0.91<br>(0.84–0.97) |
| Kisumu           | 1988        | 0.9<br>(0.84–0.97)  |
| Kisumu           | 1989        | 0.9<br>(0.85–0.97)  |
| Kisumu           | 1990        | 0.91<br>(0.84–0.97) |
| Kisumu           | 1991        | 0.91<br>(0.84–0.98) |
| Kisumu           | 1992        | 0.92<br>(0.85–0.99) |
| Kisumu           | 1993        | 0.93<br>(0.87–1.0)  |
| Kisumu           | 1994        | 0.94<br>(0.87–1.02) |
| Kisumu           | 1995        | 0.95<br>(0.88–1.03) |
| Kisumu           | 1996        | 0.96<br>(0.88–1.05) |
| Kisumu           | 1997        | 0.96<br>(0.88–1.05) |
| Kisumu           | 1998        | 0.96<br>(0.88–1.05) |
| Kisumu           | 1999        | 0.96<br>(0.88–1.03) |
| Kisumu           | 2000        | 0.95<br>(0.88–1.03) |
| Kisumu           | 2001        | 0.95<br>(0.87–1.03) |
| Kisumu           | 2002        | 0.94<br>(0.85–1.03) |
| Kisumu           | 2003        | 0.93<br>(0.84–1.02) |
| Kisumu           | 2004        | 0.92<br>(0.84–1.01) |
| Kisumu           | 2005        | 0.91<br>(0.83–1.01) |
| Kisumu           | 2006        | 0.91<br>(0.83–0.99) |
| Kisumu           | 2007        | 0.9<br>(0.83–0.97)  |
| Kisumu           | 2008        | 0.91<br>(0.83–0.99) |
| Kisumu           | 2009        | 0.91<br>(0.81–1.01) |
| Kisumu           | 2010        | 0.9<br>(0.8–1.02)   |
| Kisumu           | 2011        | 0.9<br>(0.78–1.02)  |
| Kisumu           | 2012        | 0.9<br>(0.79–1.03)  |

**Table 15 Ratio of adjusted to unadjusted 5q0 values for scaled locations by year**

| <b>Geography</b> | <b>Year</b> | <b>Ratio</b>        |
|------------------|-------------|---------------------|
| Kisumu           | 2013        | 0.89<br>(0.78–1.02) |
| Kisumu           | 2014        | 0.89<br>(0.78–1.01) |
| Kisumu           | 2015        | 0.88<br>(0.77–1.01) |
| Kisumu           | 2016        | 0.88<br>(0.77–1.0)  |
| Kisumu           | 2017        | 0.88<br>(0.76–1.01) |
| Kitui            | 1950        | 0.57<br>(0.56–0.59) |
| Kitui            | 1951        | 0.58<br>(0.56–0.61) |
| Kitui            | 1952        | 0.59<br>(0.55–0.63) |
| Kitui            | 1953        | 0.6<br>(0.55–0.65)  |
| Kitui            | 1954        | 0.61<br>(0.55–0.66) |
| Kitui            | 1955        | 0.62<br>(0.56–0.68) |
| Kitui            | 1956        | 0.62<br>(0.55–0.69) |
| Kitui            | 1957        | 0.62<br>(0.55–0.7)  |
| Kitui            | 1958        | 0.62<br>(0.55–0.7)  |
| Kitui            | 1959        | 0.63<br>(0.56–0.71) |
| Kitui            | 1960        | 0.63<br>(0.56–0.71) |
| Kitui            | 1961        | 0.64<br>(0.56–0.71) |
| Kitui            | 1962        | 0.64<br>(0.57–0.72) |
| Kitui            | 1963        | 0.65<br>(0.58–0.73) |
| Kitui            | 1964        | 0.66<br>(0.59–0.74) |
| Kitui            | 1965        | 0.67<br>(0.6–0.75)  |
| Kitui            | 1966        | 0.69<br>(0.62–0.76) |
| Kitui            | 1967        | 0.7<br>(0.63–0.78)  |
| Kitui            | 1968        | 0.72<br>(0.65–0.8)  |
| Kitui            | 1969        | 0.73<br>(0.66–0.81) |
| Kitui            | 1970        | 0.75<br>(0.68–0.83) |
| Kitui            | 1971        | 0.76<br>(0.7–0.83)  |
| Kitui            | 1972        | 0.78<br>(0.71–0.84) |
| Kitui            | 1973        | 0.79<br>(0.72–0.86) |
| Kitui            | 1974        | 0.8<br>(0.73–0.88)  |
| Kitui            | 1975        | 0.81<br>(0.73–0.89) |



**Table 15 Ratio of adjusted to unadjusted 5q0 values for scaled locations by year**

| <b>Geography</b> | <b>Year</b> | <b>Ratio</b>        |
|------------------|-------------|---------------------|
| Kitui            | 1976        | 0.81<br>(0.74–0.89) |
| Kitui            | 1977        | 0.82<br>(0.75–0.9)  |
| Kitui            | 1978        | 0.83<br>(0.75–0.91) |
| Kitui            | 1979        | 0.84<br>(0.77–0.93) |
| Kitui            | 1980        | 0.85<br>(0.77–0.94) |
| Kitui            | 1981        | 0.86<br>(0.78–0.95) |
| Kitui            | 1982        | 0.87<br>(0.79–0.96) |
| Kitui            | 1983        | 0.88<br>(0.79–0.98) |
| Kitui            | 1984        | 0.89<br>(0.79–0.99) |
| Kitui            | 1985        | 0.89<br>(0.79–1.0)  |
| Kitui            | 1986        | 0.9<br>(0.8–1.0)    |
| Kitui            | 1987        | 0.9<br>(0.81–1.0)   |
| Kitui            | 1988        | 0.91<br>(0.83–1.0)  |
| Kitui            | 1989        | 0.91<br>(0.84–1.0)  |
| Kitui            | 1990        | 0.92<br>(0.85–1.0)  |
| Kitui            | 1991        | 0.93<br>(0.85–1.01) |
| Kitui            | 1992        | 0.94<br>(0.85–1.03) |
| Kitui            | 1993        | 0.95<br>(0.85–1.05) |
| Kitui            | 1994        | 0.95<br>(0.85–1.05) |
| Kitui            | 1995        | 0.95<br>(0.85–1.05) |
| Kitui            | 1996        | 0.95<br>(0.85–1.04) |
| Kitui            | 1997        | 0.95<br>(0.87–1.04) |
| Kitui            | 1998        | 0.95<br>(0.87–1.03) |
| Kitui            | 1999        | 0.95<br>(0.87–1.03) |
| Kitui            | 2000        | 0.94<br>(0.86–1.03) |
| Kitui            | 2001        | 0.94<br>(0.85–1.04) |
| Kitui            | 2002        | 0.94<br>(0.84–1.04) |
| Kitui            | 2003        | 0.94<br>(0.83–1.05) |
| Kitui            | 2004        | 0.93<br>(0.83–1.04) |
| Kitui            | 2005        | 0.92<br>(0.83–1.03) |
| Kitui            | 2006        | 0.92<br>(0.83–1.01) |

**Table 15 Ratio of adjusted to unadjusted 5q0 values for scaled locations by year**

| <b>Geography</b> | <b>Year</b> | <b>Ratio</b>        |
|------------------|-------------|---------------------|
| Kitui            | 2007        | 0.92<br>(0.84–1.01) |
| Kitui            | 2008        | 0.94<br>(0.84–1.04) |
| Kitui            | 2009        | 0.95<br>(0.84–1.07) |
| Kitui            | 2010        | 0.96<br>(0.84–1.09) |
| Kitui            | 2011        | 0.96<br>(0.84–1.1)  |
| Kitui            | 2012        | 0.97<br>(0.84–1.12) |
| Kitui            | 2013        | 0.99<br>(0.86–1.13) |
| Kitui            | 2014        | 1.0<br>(0.88–1.13)  |
| Kitui            | 2015        | 1.0<br>(0.91–1.1)   |
| Kitui            | 2016        | 1.0<br>(0.94–1.06)  |
| Kitui            | 2017        | 1.0<br>(0.96–1.03)  |
| Kwale            | 1950        | 0.93<br>(0.92–0.94) |
| Kwale            | 1951        | 0.93<br>(0.89–0.97) |
| Kwale            | 1952        | 0.92<br>(0.86–0.98) |
| Kwale            | 1953        | 0.91<br>(0.84–0.98) |
| Kwale            | 1954        | 0.9<br>(0.84–0.97)  |
| Kwale            | 1955        | 0.9<br>(0.83–0.98)  |
| Kwale            | 1956        | 0.91<br>(0.82–1.0)  |
| Kwale            | 1957        | 0.91<br>(0.81–1.01) |
| Kwale            | 1958        | 0.91<br>(0.81–1.02) |
| Kwale            | 1959        | 0.91<br>(0.81–1.02) |
| Kwale            | 1960        | 0.92<br>(0.82–1.03) |
| Kwale            | 1961        | 0.92<br>(0.82–1.03) |
| Kwale            | 1962        | 0.93<br>(0.82–1.04) |
| Kwale            | 1963        | 0.94<br>(0.82–1.06) |
| Kwale            | 1964        | 0.95<br>(0.84–1.07) |
| Kwale            | 1965        | 0.96<br>(0.84–1.08) |
| Kwale            | 1966        | 0.97<br>(0.85–1.1)  |
| Kwale            | 1967        | 0.98<br>(0.86–1.11) |
| Kwale            | 1968        | 0.98<br>(0.88–1.11) |
| Kwale            | 1969        | 0.99<br>(0.89–1.11) |

**Table 15 Ratio of adjusted to unadjusted 5q0 values for scaled locations by year**

| <b>Geography</b> | <b>Year</b> | <b>Ratio</b>        |
|------------------|-------------|---------------------|
| Kwale            | 1970        | 1.0<br>(0.9–1.11)   |
| Kwale            | 1971        | 1.01<br>(0.9–1.12)  |
| Kwale            | 1972        | 1.01<br>(0.9–1.12)  |
| Kwale            | 1973        | 1.0<br>(0.9–1.11)   |
| Kwale            | 1974        | 0.99<br>(0.9–1.09)  |
| Kwale            | 1975        | 0.99<br>(0.89–1.09) |
| Kwale            | 1976        | 0.99<br>(0.88–1.09) |
| Kwale            | 1977        | 0.99<br>(0.88–1.09) |
| Kwale            | 1978        | 0.99<br>(0.89–1.08) |
| Kwale            | 1979        | 0.99<br>(0.89–1.09) |
| Kwale            | 1980        | 0.99<br>(0.89–1.1)  |
| Kwale            | 1981        | 0.99<br>(0.88–1.11) |
| Kwale            | 1982        | 0.99<br>(0.88–1.1)  |
| Kwale            | 1983        | 1.0<br>(0.88–1.11)  |
| Kwale            | 1984        | 1.0<br>(0.89–1.12)  |
| Kwale            | 1985        | 1.0<br>(0.9–1.12)   |
| Kwale            | 1986        | 1.01<br>(0.91–1.13) |
| Kwale            | 1987        | 1.02<br>(0.91–1.15) |
| Kwale            | 1988        | 1.02<br>(0.91–1.15) |
| Kwale            | 1989        | 1.03<br>(0.92–1.15) |
| Kwale            | 1990        | 1.03<br>(0.91–1.16) |
| Kwale            | 1991        | 1.04<br>(0.92–1.17) |
| Kwale            | 1992        | 1.05<br>(0.93–1.19) |
| Kwale            | 1993        | 1.06<br>(0.95–1.19) |
| Kwale            | 1994        | 1.06<br>(0.95–1.19) |
| Kwale            | 1995        | 1.07<br>(0.97–1.19) |
| Kwale            | 1996        | 1.07<br>(0.97–1.17) |
| Kwale            | 1997        | 1.07<br>(0.97–1.17) |
| Kwale            | 1998        | 1.06<br>(0.98–1.16) |
| Kwale            | 1999        | 1.06<br>(0.98–1.15) |
| Kwale            | 2000        | 1.06<br>(0.97–1.14) |

**Table 15 Ratio of adjusted to unadjusted 5q0 values for scaled locations by year**

| <b>Geography</b> | <b>Year</b> | <b>Ratio</b>        |
|------------------|-------------|---------------------|
| Kwale            | 2001        | 1.06<br>(0.96–1.16) |
| Kwale            | 2002        | 1.05<br>(0.94–1.17) |
| Kwale            | 2003        | 1.03<br>(0.92–1.16) |
| Kwale            | 2004        | 1.02<br>(0.91–1.14) |
| Kwale            | 2005        | 1.0<br>(0.88–1.14)  |
| Kwale            | 2006        | 0.99<br>(0.87–1.12) |
| Kwale            | 2007        | 0.99<br>(0.87–1.13) |
| Kwale            | 2008        | 1.0<br>(0.86–1.13)  |
| Kwale            | 2009        | 1.01<br>(0.86–1.17) |
| Kwale            | 2010        | 1.01<br>(0.87–1.18) |
| Kwale            | 2011        | 1.01<br>(0.86–1.17) |
| Kwale            | 2012        | 1.01<br>(0.87–1.16) |
| Kwale            | 2013        | 1.0<br>(0.87–1.14)  |
| Kwale            | 2014        | 1.0<br>(0.88–1.1)   |
| Kwale            | 2015        | 1.0<br>(0.91–1.09)  |
| Kwale            | 2016        | 1.0<br>(0.94–1.05)  |
| Kwale            | 2017        | 0.99<br>(0.98–1.0)  |
| Laikipia         | 1950        | 0.28<br>(0.27–0.29) |
| Laikipia         | 1951        | 0.28<br>(0.27–0.3)  |
| Laikipia         | 1952        | 0.29<br>(0.27–0.31) |
| Laikipia         | 1953        | 0.29<br>(0.27–0.31) |
| Laikipia         | 1954        | 0.29<br>(0.27–0.32) |
| Laikipia         | 1955        | 0.29<br>(0.27–0.33) |
| Laikipia         | 1956        | 0.3<br>(0.27–0.34)  |
| Laikipia         | 1957        | 0.3<br>(0.27–0.34)  |
| Laikipia         | 1958        | 0.31<br>(0.27–0.35) |
| Laikipia         | 1959        | 0.31<br>(0.27–0.36) |
| Laikipia         | 1960        | 0.31<br>(0.27–0.36) |
| Laikipia         | 1961        | 0.32<br>(0.28–0.37) |
| Laikipia         | 1962        | 0.33<br>(0.29–0.37) |
| Laikipia         | 1963        | 0.33<br>(0.3–0.37)  |

**Table 15 Ratio of adjusted to unadjusted 5q0 values for scaled locations by year**

| <b>Geography</b> | <b>Year</b> | <b>Ratio</b>        |
|------------------|-------------|---------------------|
| Laikipia         | 1964        | 0.34<br>(0.3–0.38)  |
| Laikipia         | 1965        | 0.36<br>(0.31–0.4)  |
| Laikipia         | 1966        | 0.37<br>(0.33–0.43) |
| Laikipia         | 1967        | 0.4<br>(0.35–0.45)  |
| Laikipia         | 1968        | 0.42<br>(0.37–0.48) |
| Laikipia         | 1969        | 0.44<br>(0.39–0.5)  |
| Laikipia         | 1970        | 0.47<br>(0.42–0.53) |
| Laikipia         | 1971        | 0.49<br>(0.45–0.55) |
| Laikipia         | 1972        | 0.52<br>(0.48–0.57) |
| Laikipia         | 1973        | 0.55<br>(0.5–0.61)  |
| Laikipia         | 1974        | 0.57<br>(0.52–0.64) |
| Laikipia         | 1975        | 0.6<br>(0.54–0.67)  |
| Laikipia         | 1976        | 0.63<br>(0.56–0.7)  |
| Laikipia         | 1977        | 0.65<br>(0.57–0.73) |
| Laikipia         | 1978        | 0.68<br>(0.59–0.77) |
| Laikipia         | 1979        | 0.7<br>(0.6–0.81)   |
| Laikipia         | 1980        | 0.72<br>(0.61–0.83) |
| Laikipia         | 1981        | 0.73<br>(0.63–0.85) |
| Laikipia         | 1982        | 0.75<br>(0.65–0.86) |
| Laikipia         | 1983        | 0.76<br>(0.67–0.87) |
| Laikipia         | 1984        | 0.78<br>(0.69–0.87) |
| Laikipia         | 1985        | 0.79<br>(0.7–0.88)  |
| Laikipia         | 1986        | 0.8<br>(0.73–0.87)  |
| Laikipia         | 1987        | 0.81<br>(0.73–0.89) |
| Laikipia         | 1988        | 0.82<br>(0.74–0.91) |
| Laikipia         | 1989        | 0.84<br>(0.74–0.94) |
| Laikipia         | 1990        | 0.86<br>(0.75–0.97) |
| Laikipia         | 1991        | 0.87<br>(0.76–0.99) |
| Laikipia         | 1992        | 0.9<br>(0.78–1.01)  |
| Laikipia         | 1993        | 0.92<br>(0.81–1.02) |
| Laikipia         | 1994        | 0.94<br>(0.84–1.03) |

**Table 15 Ratio of adjusted to unadjusted 5q0 values for scaled locations by year**

| <b>Geography</b> | <b>Year</b> | <b>Ratio</b>        |
|------------------|-------------|---------------------|
| Laikipia         | 1995        | 0.96<br>(0.87–1.05) |
| Laikipia         | 1996        | 0.97<br>(0.88–1.06) |
| Laikipia         | 1997        | 0.98<br>(0.88–1.09) |
| Laikipia         | 1998        | 0.99<br>(0.87–1.11) |
| Laikipia         | 1999        | 0.99<br>(0.86–1.13) |
| Laikipia         | 2000        | 0.99<br>(0.85–1.13) |
| Laikipia         | 2001        | 0.99<br>(0.86–1.14) |
| Laikipia         | 2002        | 0.99<br>(0.86–1.13) |
| Laikipia         | 2003        | 0.98<br>(0.86–1.12) |
| Laikipia         | 2004        | 0.98<br>(0.86–1.1)  |
| Laikipia         | 2005        | 0.98<br>(0.87–1.1)  |
| Laikipia         | 2006        | 0.98<br>(0.87–1.1)  |
| Laikipia         | 2007        | 0.97<br>(0.86–1.11) |
| Laikipia         | 2008        | 0.98<br>(0.85–1.13) |
| Laikipia         | 2009        | 0.99<br>(0.85–1.13) |
| Laikipia         | 2010        | 0.99<br>(0.85–1.12) |
| Laikipia         | 2011        | 0.98<br>(0.85–1.12) |
| Laikipia         | 2012        | 0.98<br>(0.84–1.13) |
| Laikipia         | 2013        | 0.99<br>(0.86–1.13) |
| Laikipia         | 2014        | 1.0<br>(0.89–1.12)  |
| Laikipia         | 2015        | 1.0<br>(0.91–1.09)  |
| Laikipia         | 2016        | 1.01<br>(0.95–1.07) |
| Laikipia         | 2017        | 1.0<br>(0.99–1.02)  |
| Lamu             | 1950        | 0.94<br>(0.93–0.95) |
| Lamu             | 1951        | 0.94<br>(0.91–0.97) |
| Lamu             | 1952        | 0.93<br>(0.88–0.99) |
| Lamu             | 1953        | 0.92<br>(0.86–0.98) |
| Lamu             | 1954        | 0.91<br>(0.86–0.97) |
| Lamu             | 1955        | 0.91<br>(0.85–0.98) |
| Lamu             | 1956        | 0.92<br>(0.84–1.0)  |
| Lamu             | 1957        | 0.92<br>(0.83–1.01) |

**Table 15 Ratio of adjusted to unadjusted 5q0 values for scaled locations by year**

| <b>Geography</b> | <b>Year</b> | <b>Ratio</b>        |
|------------------|-------------|---------------------|
| Lamu             | 1958        | 0.92<br>(0.83–1.02) |
| Lamu             | 1959        | 0.92<br>(0.83–1.02) |
| Lamu             | 1960        | 0.93<br>(0.83–1.03) |
| Lamu             | 1961        | 0.93<br>(0.83–1.03) |
| Lamu             | 1962        | 0.93<br>(0.83–1.04) |
| Lamu             | 1963        | 0.94<br>(0.84–1.06) |
| Lamu             | 1964        | 0.95<br>(0.85–1.07) |
| Lamu             | 1965        | 0.96<br>(0.85–1.07) |
| Lamu             | 1966        | 0.97<br>(0.87–1.09) |
| Lamu             | 1967        | 0.98<br>(0.87–1.1)  |
| Lamu             | 1968        | 0.99<br>(0.89–1.1)  |
| Lamu             | 1969        | 0.99<br>(0.89–1.1)  |
| Lamu             | 1970        | 1.0<br>(0.9–1.11)   |
| Lamu             | 1971        | 1.01<br>(0.91–1.12) |
| Lamu             | 1972        | 1.01<br>(0.9–1.12)  |
| Lamu             | 1973        | 1.0<br>(0.9–1.1)    |
| Lamu             | 1974        | 0.99<br>(0.9–1.09)  |
| Lamu             | 1975        | 0.99<br>(0.9–1.09)  |
| Lamu             | 1976        | 0.99<br>(0.89–1.09) |
| Lamu             | 1977        | 0.99<br>(0.88–1.09) |
| Lamu             | 1978        | 0.99<br>(0.89–1.08) |
| Lamu             | 1979        | 0.99<br>(0.89–1.09) |
| Lamu             | 1980        | 0.99<br>(0.89–1.1)  |
| Lamu             | 1981        | 0.99<br>(0.88–1.11) |
| Lamu             | 1982        | 0.99<br>(0.88–1.1)  |
| Lamu             | 1983        | 1.0<br>(0.88–1.11)  |
| Lamu             | 1984        | 1.0<br>(0.89–1.12)  |
| Lamu             | 1985        | 1.0<br>(0.9–1.12)   |
| Lamu             | 1986        | 1.01<br>(0.91–1.13) |
| Lamu             | 1987        | 1.02<br>(0.91–1.15) |
| Lamu             | 1988        | 1.02<br>(0.91–1.15) |

**Table 15 Ratio of adjusted to unadjusted 5q0 values for scaled locations by year**

| <b>Geography</b> | <b>Year</b> | <b>Ratio</b>        |
|------------------|-------------|---------------------|
| Lamu             | 1989        | 1.03<br>(0.92–1.15) |
| Lamu             | 1990        | 1.03<br>(0.91–1.16) |
| Lamu             | 1991        | 1.04<br>(0.92–1.17) |
| Lamu             | 1992        | 1.05<br>(0.93–1.19) |
| Lamu             | 1993        | 1.06<br>(0.95–1.19) |
| Lamu             | 1994        | 1.06<br>(0.95–1.19) |
| Lamu             | 1995        | 1.07<br>(0.97–1.19) |
| Lamu             | 1996        | 1.07<br>(0.97–1.17) |
| Lamu             | 1997        | 1.07<br>(0.97–1.17) |
| Lamu             | 1998        | 1.06<br>(0.98–1.15) |
| Lamu             | 1999        | 1.06<br>(0.98–1.14) |
| Lamu             | 2000        | 1.05<br>(0.97–1.14) |
| Lamu             | 2001        | 1.06<br>(0.96–1.16) |
| Lamu             | 2002        | 1.05<br>(0.94–1.16) |
| Lamu             | 2003        | 1.03<br>(0.92–1.16) |
| Lamu             | 2004        | 1.02<br>(0.91–1.14) |
| Lamu             | 2005        | 1.0<br>(0.88–1.14)  |
| Lamu             | 2006        | 0.99<br>(0.87–1.12) |
| Lamu             | 2007        | 0.99<br>(0.87–1.12) |
| Lamu             | 2008        | 1.0<br>(0.87–1.13)  |
| Lamu             | 2009        | 1.01<br>(0.86–1.17) |
| Lamu             | 2010        | 1.01<br>(0.87–1.18) |
| Lamu             | 2011        | 1.01<br>(0.86–1.17) |
| Lamu             | 2012        | 1.01<br>(0.87–1.16) |
| Lamu             | 2013        | 1.0<br>(0.87–1.14)  |
| Lamu             | 2014        | 1.0<br>(0.89–1.1)   |
| Lamu             | 2015        | 1.0<br>(0.91–1.09)  |
| Lamu             | 2016        | 1.0<br>(0.94–1.05)  |
| Lamu             | 2017        | 0.99<br>(0.98–1.0)  |
| Machakos         | 1950        | 0.56<br>(0.55–0.57) |
| Machakos         | 1951        | 0.57<br>(0.55–0.6)  |



**Table 15 Ratio of adjusted to unadjusted 5q0 values for scaled locations by year**

| <b>Geography</b> | <b>Year</b> | <b>Ratio</b>        |
|------------------|-------------|---------------------|
| Machakos         | 1952        | 0.58<br>(0.54–0.63) |
| Machakos         | 1953        | 0.59<br>(0.54–0.64) |
| Machakos         | 1954        | 0.6<br>(0.54–0.65)  |
| Machakos         | 1955        | 0.61<br>(0.55–0.67) |
| Machakos         | 1956        | 0.61<br>(0.54–0.68) |
| Machakos         | 1957        | 0.61<br>(0.54–0.69) |
| Machakos         | 1958        | 0.61<br>(0.54–0.69) |
| Machakos         | 1959        | 0.62<br>(0.55–0.7)  |
| Machakos         | 1960        | 0.62<br>(0.55–0.71) |
| Machakos         | 1961        | 0.63<br>(0.55–0.71) |
| Machakos         | 1962        | 0.63<br>(0.56–0.71) |
| Machakos         | 1963        | 0.64<br>(0.57–0.72) |
| Machakos         | 1964        | 0.65<br>(0.58–0.74) |
| Machakos         | 1965        | 0.67<br>(0.59–0.75) |
| Machakos         | 1966        | 0.68<br>(0.61–0.76) |
| Machakos         | 1967        | 0.7<br>(0.63–0.77)  |
| Machakos         | 1968        | 0.71<br>(0.64–0.8)  |
| Machakos         | 1969        | 0.73<br>(0.65–0.81) |
| Machakos         | 1970        | 0.74<br>(0.67–0.82) |
| Machakos         | 1971        | 0.76<br>(0.69–0.83) |
| Machakos         | 1972        | 0.77<br>(0.71–0.84) |
| Machakos         | 1973        | 0.78<br>(0.71–0.86) |
| Machakos         | 1974        | 0.79<br>(0.72–0.88) |
| Machakos         | 1975        | 0.8<br>(0.73–0.88)  |
| Machakos         | 1976        | 0.81<br>(0.74–0.89) |
| Machakos         | 1977        | 0.82<br>(0.74–0.9)  |
| Machakos         | 1978        | 0.83<br>(0.75–0.91) |
| Machakos         | 1979        | 0.84<br>(0.77–0.93) |
| Machakos         | 1980        | 0.85<br>(0.77–0.94) |
| Machakos         | 1981        | 0.86<br>(0.78–0.95) |
| Machakos         | 1982        | 0.87<br>(0.78–0.96) |

**Table 15 Ratio of adjusted to unadjusted 5q0 values for scaled locations by year**

| <b>Geography</b> | <b>Year</b> | <b>Ratio</b>        |
|------------------|-------------|---------------------|
| Machakos         | 1983        | 0.88<br>(0.79–0.98) |
| Machakos         | 1984        | 0.89<br>(0.79–0.99) |
| Machakos         | 1985        | 0.89<br>(0.79–1.0)  |
| Machakos         | 1986        | 0.9<br>(0.8–1.0)    |
| Machakos         | 1987        | 0.9<br>(0.81–1.0)   |
| Machakos         | 1988        | 0.91<br>(0.83–1.0)  |
| Machakos         | 1989        | 0.91<br>(0.84–1.0)  |
| Machakos         | 1990        | 0.92<br>(0.85–1.0)  |
| Machakos         | 1991        | 0.93<br>(0.84–1.01) |
| Machakos         | 1992        | 0.94<br>(0.85–1.03) |
| Machakos         | 1993        | 0.95<br>(0.84–1.05) |
| Machakos         | 1994        | 0.95<br>(0.85–1.05) |
| Machakos         | 1995        | 0.95<br>(0.85–1.05) |
| Machakos         | 1996        | 0.95<br>(0.85–1.04) |
| Machakos         | 1997        | 0.95<br>(0.86–1.04) |
| Machakos         | 1998        | 0.95<br>(0.87–1.03) |
| Machakos         | 1999        | 0.95<br>(0.87–1.03) |
| Machakos         | 2000        | 0.94<br>(0.86–1.03) |
| Machakos         | 2001        | 0.94<br>(0.84–1.04) |
| Machakos         | 2002        | 0.94<br>(0.84–1.04) |
| Machakos         | 2003        | 0.94<br>(0.83–1.05) |
| Machakos         | 2004        | 0.93<br>(0.83–1.05) |
| Machakos         | 2005        | 0.92<br>(0.83–1.03) |
| Machakos         | 2006        | 0.92<br>(0.83–1.01) |
| Machakos         | 2007        | 0.92<br>(0.84–1.01) |
| Machakos         | 2008        | 0.94<br>(0.84–1.04) |
| Machakos         | 2009        | 0.95<br>(0.84–1.07) |
| Machakos         | 2010        | 0.96<br>(0.84–1.09) |
| Machakos         | 2011        | 0.96<br>(0.84–1.1)  |
| Machakos         | 2012        | 0.97<br>(0.84–1.12) |
| Machakos         | 2013        | 0.99<br>(0.86–1.13) |

**Table 15 Ratio of adjusted to unadjusted 5q0 values for scaled locations by year**

| <b>Geography</b> | <b>Year</b> | <b>Ratio</b>        |
|------------------|-------------|---------------------|
| Machakos         | 2014        | 1.0<br>(0.88–1.13)  |
| Machakos         | 2015        | 1.0<br>(0.91–1.1)   |
| Machakos         | 2016        | 1.0<br>(0.94–1.06)  |
| Machakos         | 2017        | 1.0<br>(0.96–1.03)  |
| Makueni          | 1950        | 0.53<br>(0.53–0.54) |
| Makueni          | 1951        | 0.55<br>(0.52–0.57) |
| Makueni          | 1952        | 0.56<br>(0.52–0.6)  |
| Makueni          | 1953        | 0.57<br>(0.51–0.62) |
| Makueni          | 1954        | 0.57<br>(0.52–0.63) |
| Makueni          | 1955        | 0.59<br>(0.52–0.65) |
| Makueni          | 1956        | 0.59<br>(0.52–0.66) |
| Makueni          | 1957        | 0.6<br>(0.52–0.68)  |
| Makueni          | 1958        | 0.6<br>(0.52–0.68)  |
| Makueni          | 1959        | 0.6<br>(0.53–0.69)  |
| Makueni          | 1960        | 0.61<br>(0.53–0.7)  |
| Makueni          | 1961        | 0.62<br>(0.54–0.7)  |
| Makueni          | 1962        | 0.62<br>(0.55–0.7)  |
| Makueni          | 1963        | 0.63<br>(0.56–0.71) |
| Makueni          | 1964        | 0.65<br>(0.57–0.73) |
| Makueni          | 1965        | 0.66<br>(0.58–0.74) |
| Makueni          | 1966        | 0.67<br>(0.6–0.75)  |
| Makueni          | 1967        | 0.69<br>(0.62–0.77) |
| Makueni          | 1968        | 0.71<br>(0.63–0.79) |
| Makueni          | 1969        | 0.72<br>(0.65–0.8)  |
| Makueni          | 1970        | 0.74<br>(0.67–0.82) |
| Makueni          | 1971        | 0.76<br>(0.69–0.83) |
| Makueni          | 1972        | 0.77<br>(0.7–0.84)  |
| Makueni          | 1973        | 0.78<br>(0.71–0.86) |
| Makueni          | 1974        | 0.79<br>(0.72–0.87) |
| Makueni          | 1975        | 0.8<br>(0.73–0.88)  |
| Makueni          | 1976        | 0.81<br>(0.74–0.89) |

**Table 15 Ratio of adjusted to unadjusted 5q0 values for scaled locations by year**

| <b>Geography</b> | <b>Year</b> | <b>Ratio</b>        |
|------------------|-------------|---------------------|
| Makueni          | 1977        | 0.82<br>(0.74–0.9)  |
| Makueni          | 1978        | 0.83<br>(0.75–0.91) |
| Makueni          | 1979        | 0.84<br>(0.77–0.93) |
| Makueni          | 1980        | 0.85<br>(0.77–0.94) |
| Makueni          | 1981        | 0.86<br>(0.78–0.95) |
| Makueni          | 1982        | 0.87<br>(0.79–0.96) |
| Makueni          | 1983        | 0.88<br>(0.79–0.98) |
| Makueni          | 1984        | 0.89<br>(0.79–0.99) |
| Makueni          | 1985        | 0.89<br>(0.79–1.0)  |
| Makueni          | 1986        | 0.9<br>(0.8–1.0)    |
| Makueni          | 1987        | 0.9<br>(0.81–1.0)   |
| Makueni          | 1988        | 0.91<br>(0.83–1.0)  |
| Makueni          | 1989        | 0.91<br>(0.84–1.0)  |
| Makueni          | 1990        | 0.92<br>(0.85–1.0)  |
| Makueni          | 1991        | 0.93<br>(0.85–1.01) |
| Makueni          | 1992        | 0.94<br>(0.85–1.03) |
| Makueni          | 1993        | 0.95<br>(0.85–1.05) |
| Makueni          | 1994        | 0.95<br>(0.85–1.05) |
| Makueni          | 1995        | 0.95<br>(0.85–1.05) |
| Makueni          | 1996        | 0.95<br>(0.85–1.04) |
| Makueni          | 1997        | 0.95<br>(0.87–1.04) |
| Makueni          | 1998        | 0.95<br>(0.87–1.03) |
| Makueni          | 1999        | 0.95<br>(0.87–1.03) |
| Makueni          | 2000        | 0.94<br>(0.86–1.03) |
| Makueni          | 2001        | 0.94<br>(0.85–1.04) |
| Makueni          | 2002        | 0.94<br>(0.84–1.04) |
| Makueni          | 2003        | 0.94<br>(0.83–1.05) |
| Makueni          | 2004        | 0.93<br>(0.83–1.05) |
| Makueni          | 2005        | 0.92<br>(0.83–1.03) |
| Makueni          | 2006        | 0.92<br>(0.83–1.01) |
| Makueni          | 2007        | 0.92<br>(0.84–1.01) |

**Table 15 Ratio of adjusted to unadjusted 5q0 values for scaled locations by year**

| <b>Geography</b> | <b>Year</b> | <b>Ratio</b>        |
|------------------|-------------|---------------------|
| Makueni          | 2008        | 0.94<br>(0.84–1.04) |
| Makueni          | 2009        | 0.95<br>(0.84–1.07) |
| Makueni          | 2010        | 0.96<br>(0.84–1.09) |
| Makueni          | 2011        | 0.96<br>(0.84–1.1)  |
| Makueni          | 2012        | 0.97<br>(0.84–1.12) |
| Makueni          | 2013        | 0.99<br>(0.86–1.13) |
| Makueni          | 2014        | 1.0<br>(0.88–1.13)  |
| Makueni          | 2015        | 1.0<br>(0.91–1.1)   |
| Makueni          | 2016        | 1.0<br>(0.94–1.06)  |
| Makueni          | 2017        | 1.0<br>(0.96–1.03)  |
| Mandera          | 1950        | 0.58<br>(0.57–0.58) |
| Mandera          | 1951        | 0.57<br>(0.55–0.6)  |
| Mandera          | 1952        | 0.57<br>(0.53–0.61) |
| Mandera          | 1953        | 0.57<br>(0.52–0.62) |
| Mandera          | 1954        | 0.56<br>(0.51–0.61) |
| Mandera          | 1955        | 0.56<br>(0.51–0.61) |
| Mandera          | 1956        | 0.56<br>(0.51–0.61) |
| Mandera          | 1957        | 0.56<br>(0.5–0.62)  |
| Mandera          | 1958        | 0.56<br>(0.49–0.62) |
| Mandera          | 1959        | 0.56<br>(0.49–0.63) |
| Mandera          | 1960        | 0.56<br>(0.49–0.64) |
| Mandera          | 1961        | 0.57<br>(0.49–0.65) |
| Mandera          | 1962        | 0.57<br>(0.5–0.66)  |
| Mandera          | 1963        | 0.58<br>(0.51–0.67) |
| Mandera          | 1964        | 0.6<br>(0.52–0.68)  |
| Mandera          | 1965        | 0.61<br>(0.54–0.68) |
| Mandera          | 1966        | 0.63<br>(0.56–0.7)  |
| Mandera          | 1967        | 0.64<br>(0.57–0.72) |
| Mandera          | 1968        | 0.66<br>(0.58–0.74) |
| Mandera          | 1969        | 0.67<br>(0.59–0.76) |
| Mandera          | 1970        | 0.69<br>(0.59–0.79) |

**Table 15 Ratio of adjusted to unadjusted 5q0 values for scaled locations by year**

| <b>Geography</b> | <b>Year</b> | <b>Ratio</b>        |
|------------------|-------------|---------------------|
| Mandera          | 1971        | 0.7<br>(0.61–0.81)  |
| Mandera          | 1972        | 0.72<br>(0.63–0.82) |
| Mandera          | 1973        | 0.73<br>(0.65–0.82) |
| Mandera          | 1974        | 0.74<br>(0.67–0.81) |
| Mandera          | 1975        | 0.75<br>(0.67–0.82) |
| Mandera          | 1976        | 0.75<br>(0.66–0.84) |
| Mandera          | 1977        | 0.76<br>(0.66–0.87) |
| Mandera          | 1978        | 0.77<br>(0.66–0.89) |
| Mandera          | 1979        | 0.78<br>(0.67–0.89) |
| Mandera          | 1980        | 0.78<br>(0.68–0.89) |
| Mandera          | 1981        | 0.78<br>(0.69–0.88) |
| Mandera          | 1982        | 0.78<br>(0.71–0.88) |
| Mandera          | 1983        | 0.79<br>(0.71–0.87) |
| Mandera          | 1984        | 0.79<br>(0.71–0.88) |
| Mandera          | 1985        | 0.79<br>(0.7–0.88)  |
| Mandera          | 1986        | 0.79<br>(0.7–0.89)  |
| Mandera          | 1987        | 0.79<br>(0.7–0.89)  |
| Mandera          | 1988        | 0.79<br>(0.7–0.89)  |
| Mandera          | 1989        | 0.79<br>(0.7–0.89)  |
| Mandera          | 1990        | 0.8<br>(0.71–0.9)   |
| Mandera          | 1991        | 0.81<br>(0.72–0.89) |
| Mandera          | 1992        | 0.82<br>(0.74–0.9)  |
| Mandera          | 1993        | 0.83<br>(0.74–0.91) |
| Mandera          | 1994        | 0.83<br>(0.74–0.93) |
| Mandera          | 1995        | 0.84<br>(0.73–0.96) |
| Mandera          | 1996        | 0.85<br>(0.74–0.97) |
| Mandera          | 1997        | 0.85<br>(0.74–0.97) |
| Mandera          | 1998        | 0.85<br>(0.75–0.97) |
| Mandera          | 1999        | 0.84<br>(0.75–0.95) |
| Mandera          | 2000        | 0.84<br>(0.75–0.94) |
| Mandera          | 2001        | 0.84<br>(0.75–0.95) |

**Table 15 Ratio of adjusted to unadjusted 5q0 values for scaled locations by year**

| <b>Geography</b> | <b>Year</b> | <b>Ratio</b>        |
|------------------|-------------|---------------------|
| Mandera          | 2002        | 0.83<br>(0.74–0.94) |
| Mandera          | 2003        | 0.82<br>(0.72–0.92) |
| Mandera          | 2004        | 0.8<br>(0.71–0.91)  |
| Mandera          | 2005        | 0.79<br>(0.7–0.89)  |
| Mandera          | 2006        | 0.78<br>(0.7–0.88)  |
| Mandera          | 2007        | 0.78<br>(0.7–0.87)  |
| Mandera          | 2008        | 0.77<br>(0.68–0.87) |
| Mandera          | 2009        | 0.77<br>(0.67–0.88) |
| Mandera          | 2010        | 0.76<br>(0.66–0.87) |
| Mandera          | 2011        | 0.75<br>(0.65–0.87) |
| Mandera          | 2012        | 0.75<br>(0.64–0.86) |
| Mandera          | 2013        | 0.74<br>(0.64–0.85) |
| Mandera          | 2014        | 0.73<br>(0.65–0.83) |
| Mandera          | 2015        | 0.73<br>(0.66–0.81) |
| Mandera          | 2016        | 0.72<br>(0.69–0.77) |
| Mandera          | 2017        | 0.72<br>(0.71–0.73) |
| Marsabit         | 1950        | 0.65<br>(0.63–0.67) |
| Marsabit         | 1951        | 0.66<br>(0.63–0.68) |
| Marsabit         | 1952        | 0.66<br>(0.63–0.7)  |
| Marsabit         | 1953        | 0.67<br>(0.62–0.72) |
| Marsabit         | 1954        | 0.67<br>(0.62–0.73) |
| Marsabit         | 1955        | 0.68<br>(0.62–0.74) |
| Marsabit         | 1956        | 0.68<br>(0.62–0.74) |
| Marsabit         | 1957        | 0.68<br>(0.61–0.75) |
| Marsabit         | 1958        | 0.68<br>(0.61–0.75) |
| Marsabit         | 1959        | 0.68<br>(0.61–0.75) |
| Marsabit         | 1960        | 0.68<br>(0.61–0.76) |
| Marsabit         | 1961        | 0.68<br>(0.61–0.76) |
| Marsabit         | 1962        | 0.69<br>(0.62–0.75) |
| Marsabit         | 1963        | 0.69<br>(0.63–0.76) |
| Marsabit         | 1964        | 0.7<br>(0.64–0.77)  |

**Table 15 Ratio of adjusted to unadjusted 5q0 values for scaled locations by year**

| <b>Geography</b> | <b>Year</b> | <b>Ratio</b>        |
|------------------|-------------|---------------------|
| Marsabit         | 1965        | 0.71<br>(0.64–0.78) |
| Marsabit         | 1966        | 0.72<br>(0.66–0.79) |
| Marsabit         | 1967        | 0.73<br>(0.67–0.8)  |
| Marsabit         | 1968        | 0.74<br>(0.68–0.82) |
| Marsabit         | 1969        | 0.75<br>(0.68–0.83) |
| Marsabit         | 1970        | 0.77<br>(0.7–0.84)  |
| Marsabit         | 1971        | 0.78<br>(0.72–0.85) |
| Marsabit         | 1972        | 0.79<br>(0.73–0.86) |
| Marsabit         | 1973        | 0.8<br>(0.74–0.87)  |
| Marsabit         | 1974        | 0.81<br>(0.74–0.88) |
| Marsabit         | 1975        | 0.82<br>(0.75–0.89) |
| Marsabit         | 1976        | 0.82<br>(0.75–0.9)  |
| Marsabit         | 1977        | 0.83<br>(0.76–0.91) |
| Marsabit         | 1978        | 0.84<br>(0.76–0.91) |
| Marsabit         | 1979        | 0.85<br>(0.78–0.93) |
| Marsabit         | 1980        | 0.86<br>(0.78–0.95) |
| Marsabit         | 1981        | 0.87<br>(0.79–0.96) |
| Marsabit         | 1982        | 0.88<br>(0.79–0.96) |
| Marsabit         | 1983        | 0.89<br>(0.8–0.98)  |
| Marsabit         | 1984        | 0.89<br>(0.8–0.99)  |
| Marsabit         | 1985        | 0.9<br>(0.79–1.0)   |
| Marsabit         | 1986        | 0.9<br>(0.8–1.0)    |
| Marsabit         | 1987        | 0.91<br>(0.81–1.0)  |
| Marsabit         | 1988        | 0.91<br>(0.83–1.0)  |
| Marsabit         | 1989        | 0.92<br>(0.84–1.0)  |
| Marsabit         | 1990        | 0.92<br>(0.85–1.0)  |
| Marsabit         | 1991        | 0.93<br>(0.85–1.01) |
| Marsabit         | 1992        | 0.94<br>(0.85–1.03) |
| Marsabit         | 1993        | 0.95<br>(0.85–1.05) |
| Marsabit         | 1994        | 0.95<br>(0.85–1.05) |
| Marsabit         | 1995        | 0.95<br>(0.85–1.05) |



**Table 15 Ratio of adjusted to unadjusted 5q0 values for scaled locations by year**

| <b>Geography</b> | <b>Year</b> | <b>Ratio</b>        |
|------------------|-------------|---------------------|
| Marsabit         | 1996        | 0.95<br>(0.85–1.04) |
| Marsabit         | 1997        | 0.95<br>(0.87–1.04) |
| Marsabit         | 1998        | 0.95<br>(0.87–1.03) |
| Marsabit         | 1999        | 0.95<br>(0.87–1.03) |
| Marsabit         | 2000        | 0.94<br>(0.86–1.03) |
| Marsabit         | 2001        | 0.94<br>(0.85–1.04) |
| Marsabit         | 2002        | 0.94<br>(0.84–1.04) |
| Marsabit         | 2003        | 0.94<br>(0.83–1.05) |
| Marsabit         | 2004        | 0.93<br>(0.83–1.04) |
| Marsabit         | 2005        | 0.92<br>(0.83–1.03) |
| Marsabit         | 2006        | 0.92<br>(0.84–1.01) |
| Marsabit         | 2007        | 0.92<br>(0.84–1.01) |
| Marsabit         | 2008        | 0.94<br>(0.85–1.04) |
| Marsabit         | 2009        | 0.95<br>(0.85–1.07) |
| Marsabit         | 2010        | 0.96<br>(0.84–1.09) |
| Marsabit         | 2011        | 0.96<br>(0.84–1.1)  |
| Marsabit         | 2012        | 0.97<br>(0.84–1.12) |
| Marsabit         | 2013        | 0.99<br>(0.86–1.13) |
| Marsabit         | 2014        | 1.0<br>(0.88–1.12)  |
| Marsabit         | 2015        | 1.0<br>(0.91–1.1)   |
| Marsabit         | 2016        | 1.0<br>(0.94–1.06)  |
| Marsabit         | 2017        | 1.0<br>(0.96–1.03)  |
| Meru             | 1950        | 0.56<br>(0.55–0.57) |
| Meru             | 1951        | 0.58<br>(0.55–0.6)  |
| Meru             | 1952        | 0.58<br>(0.54–0.63) |
| Meru             | 1953        | 0.59<br>(0.54–0.64) |
| Meru             | 1954        | 0.59<br>(0.53–0.65) |
| Meru             | 1955        | 0.6<br>(0.54–0.67)  |
| Meru             | 1956        | 0.61<br>(0.54–0.68) |
| Meru             | 1957        | 0.61<br>(0.53–0.69) |
| Meru             | 1958        | 0.61<br>(0.54–0.69) |

**Table 15 Ratio of adjusted to unadjusted 5q0 values for scaled locations by year**

| <b>Geography</b> | <b>Year</b> | <b>Ratio</b>        |
|------------------|-------------|---------------------|
| Meru             | 1959        | 0.61<br>(0.54–0.69) |
| Meru             | 1960        | 0.62<br>(0.54–0.7)  |
| Meru             | 1961        | 0.62<br>(0.55–0.7)  |
| Meru             | 1962        | 0.63<br>(0.56–0.71) |
| Meru             | 1963        | 0.64<br>(0.56–0.72) |
| Meru             | 1964        | 0.65<br>(0.58–0.73) |
| Meru             | 1965        | 0.66<br>(0.58–0.74) |
| Meru             | 1966        | 0.68<br>(0.61–0.76) |
| Meru             | 1967        | 0.69<br>(0.62–0.77) |
| Meru             | 1968        | 0.71<br>(0.64–0.79) |
| Meru             | 1969        | 0.72<br>(0.65–0.8)  |
| Meru             | 1970        | 0.74<br>(0.66–0.82) |
| Meru             | 1971        | 0.76<br>(0.69–0.83) |
| Meru             | 1972        | 0.77<br>(0.7–0.84)  |
| Meru             | 1973        | 0.78<br>(0.71–0.86) |
| Meru             | 1974        | 0.79<br>(0.72–0.87) |
| Meru             | 1975        | 0.8<br>(0.73–0.88)  |
| Meru             | 1976        | 0.81<br>(0.74–0.89) |
| Meru             | 1977        | 0.82<br>(0.74–0.9)  |
| Meru             | 1978        | 0.82<br>(0.75–0.91) |
| Meru             | 1979        | 0.84<br>(0.76–0.93) |
| Meru             | 1980        | 0.85<br>(0.77–0.94) |
| Meru             | 1981        | 0.86<br>(0.78–0.95) |
| Meru             | 1982        | 0.87<br>(0.78–0.96) |
| Meru             | 1983        | 0.88<br>(0.79–0.98) |
| Meru             | 1984        | 0.89<br>(0.79–0.99) |
| Meru             | 1985        | 0.89<br>(0.78–1.0)  |
| Meru             | 1986        | 0.9<br>(0.79–1.0)   |
| Meru             | 1987        | 0.9<br>(0.8–1.0)    |
| Meru             | 1988        | 0.91<br>(0.83–1.0)  |
| Meru             | 1989        | 0.91<br>(0.84–1.0)  |

**Table 15 Ratio of adjusted to unadjusted 5q0 values for scaled locations by year**

| <b>Geography</b> | <b>Year</b> | <b>Ratio</b>        |
|------------------|-------------|---------------------|
| Meru             | 1990        | 0.92<br>(0.85–1.0)  |
| Meru             | 1991        | 0.93<br>(0.84–1.01) |
| Meru             | 1992        | 0.94<br>(0.85–1.03) |
| Meru             | 1993        | 0.95<br>(0.84–1.05) |
| Meru             | 1994        | 0.95<br>(0.85–1.05) |
| Meru             | 1995        | 0.95<br>(0.85–1.05) |
| Meru             | 1996        | 0.95<br>(0.85–1.04) |
| Meru             | 1997        | 0.95<br>(0.86–1.04) |
| Meru             | 1998        | 0.95<br>(0.87–1.03) |
| Meru             | 1999        | 0.95<br>(0.87–1.03) |
| Meru             | 2000        | 0.94<br>(0.86–1.03) |
| Meru             | 2001        | 0.94<br>(0.84–1.04) |
| Meru             | 2002        | 0.94<br>(0.84–1.04) |
| Meru             | 2003        | 0.94<br>(0.83–1.05) |
| Meru             | 2004        | 0.93<br>(0.83–1.05) |
| Meru             | 2005        | 0.92<br>(0.83–1.03) |
| Meru             | 2006        | 0.92<br>(0.83–1.01) |
| Meru             | 2007        | 0.92<br>(0.84–1.01) |
| Meru             | 2008        | 0.94<br>(0.85–1.04) |
| Meru             | 2009        | 0.95<br>(0.85–1.07) |
| Meru             | 2010        | 0.96<br>(0.84–1.09) |
| Meru             | 2011        | 0.96<br>(0.84–1.1)  |
| Meru             | 2012        | 0.97<br>(0.84–1.12) |
| Meru             | 2013        | 0.99<br>(0.86–1.13) |
| Meru             | 2014        | 1.0<br>(0.88–1.13)  |
| Meru             | 2015        | 1.0<br>(0.91–1.1)   |
| Meru             | 2016        | 1.0<br>(0.94–1.06)  |
| Meru             | 2017        | 1.0<br>(0.96–1.03)  |
| Migori           | 1950        | 0.75<br>(0.68–0.82) |
| Migori           | 1951        | 0.75<br>(0.68–0.82) |
| Migori           | 1952        | 0.75<br>(0.68–0.83) |

**Table 15 Ratio of adjusted to unadjusted 5q0 values for scaled locations by year**

| <b>Geography</b> | <b>Year</b> | <b>Ratio</b>        |
|------------------|-------------|---------------------|
| Migori           | 1953        | 0.75<br>(0.67–0.83) |
| Migori           | 1954        | 0.74<br>(0.65–0.83) |
| Migori           | 1955        | 0.73<br>(0.65–0.83) |
| Migori           | 1956        | 0.73<br>(0.65–0.83) |
| Migori           | 1957        | 0.73<br>(0.65–0.82) |
| Migori           | 1958        | 0.73<br>(0.65–0.81) |
| Migori           | 1959        | 0.73<br>(0.66–0.81) |
| Migori           | 1960        | 0.73<br>(0.66–0.81) |
| Migori           | 1961        | 0.74<br>(0.66–0.81) |
| Migori           | 1962        | 0.74<br>(0.66–0.82) |
| Migori           | 1963        | 0.75<br>(0.67–0.83) |
| Migori           | 1964        | 0.76<br>(0.68–0.84) |
| Migori           | 1965        | 0.77<br>(0.69–0.84) |
| Migori           | 1966        | 0.78<br>(0.7–0.86)  |
| Migori           | 1967        | 0.79<br>(0.72–0.87) |
| Migori           | 1968        | 0.8<br>(0.73–0.88)  |
| Migori           | 1969        | 0.81<br>(0.74–0.89) |
| Migori           | 1970        | 0.83<br>(0.76–0.91) |
| Migori           | 1971        | 0.84<br>(0.77–0.92) |
| Migori           | 1972        | 0.86<br>(0.78–0.94) |
| Migori           | 1973        | 0.87<br>(0.8–0.95)  |
| Migori           | 1974        | 0.88<br>(0.8–0.96)  |
| Migori           | 1975        | 0.9<br>(0.81–0.98)  |
| Migori           | 1976        | 0.91<br>(0.82–1.0)  |
| Migori           | 1977        | 0.92<br>(0.83–1.01) |
| Migori           | 1978        | 0.93<br>(0.85–1.01) |
| Migori           | 1979        | 0.93<br>(0.85–1.01) |
| Migori           | 1980        | 0.93<br>(0.86–1.01) |
| Migori           | 1981        | 0.93<br>(0.87–1.01) |
| Migori           | 1982        | 0.93<br>(0.86–1.01) |
| Migori           | 1983        | 0.93<br>(0.86–1.01) |

**Table 15 Ratio of adjusted to unadjusted 5q0 values for scaled locations by year**

| <b>Geography</b> | <b>Year</b> | <b>Ratio</b>        |
|------------------|-------------|---------------------|
| Migori           | 1984        | 0.93<br>(0.86–1.0)  |
| Migori           | 1985        | 0.92<br>(0.85–0.99) |
| Migori           | 1986        | 0.91<br>(0.85–0.98) |
| Migori           | 1987        | 0.91<br>(0.85–0.98) |
| Migori           | 1988        | 0.91<br>(0.86–0.97) |
| Migori           | 1989        | 0.91<br>(0.86–0.97) |
| Migori           | 1990        | 0.91<br>(0.85–0.97) |
| Migori           | 1991        | 0.92<br>(0.85–0.98) |
| Migori           | 1992        | 0.93<br>(0.86–0.99) |
| Migori           | 1993        | 0.94<br>(0.87–1.0)  |
| Migori           | 1994        | 0.94<br>(0.88–1.02) |
| Migori           | 1995        | 0.95<br>(0.88–1.03) |
| Migori           | 1996        | 0.96<br>(0.88–1.04) |
| Migori           | 1997        | 0.96<br>(0.88–1.05) |
| Migori           | 1998        | 0.96<br>(0.89–1.04) |
| Migori           | 1999        | 0.96<br>(0.89–1.03) |
| Migori           | 2000        | 0.96<br>(0.89–1.03) |
| Migori           | 2001        | 0.95<br>(0.88–1.03) |
| Migori           | 2002        | 0.94<br>(0.86–1.03) |
| Migori           | 2003        | 0.93<br>(0.85–1.02) |
| Migori           | 2004        | 0.92<br>(0.84–1.01) |
| Migori           | 2005        | 0.91<br>(0.84–1.01) |
| Migori           | 2006        | 0.91<br>(0.83–0.99) |
| Migori           | 2007        | 0.91<br>(0.84–0.97) |
| Migori           | 2008        | 0.91<br>(0.83–0.99) |
| Migori           | 2009        | 0.91<br>(0.82–1.01) |
| Migori           | 2010        | 0.9<br>(0.8–1.02)   |
| Migori           | 2011        | 0.9<br>(0.79–1.02)  |
| Migori           | 2012        | 0.9<br>(0.79–1.03)  |
| Migori           | 2013        | 0.89<br>(0.78–1.02) |
| Migori           | 2014        | 0.89<br>(0.78–1.01) |

**Table 15 Ratio of adjusted to unadjusted 5q0 values for scaled locations by year**

| <b>Geography</b> | <b>Year</b> | <b>Ratio</b>        |
|------------------|-------------|---------------------|
| Migori           | 2015        | 0.89<br>(0.78–1.01) |
| Migori           | 2016        | 0.88<br>(0.77–1.0)  |
| Migori           | 2017        | 0.88<br>(0.77–1.01) |
| Mombasa          | 1950        | 0.93<br>(0.92–0.94) |
| Mombasa          | 1951        | 0.93<br>(0.89–0.97) |
| Mombasa          | 1952        | 0.92<br>(0.86–0.98) |
| Mombasa          | 1953        | 0.91<br>(0.84–0.98) |
| Mombasa          | 1954        | 0.9<br>(0.83–0.97)  |
| Mombasa          | 1955        | 0.9<br>(0.82–0.98)  |
| Mombasa          | 1956        | 0.9<br>(0.81–1.0)   |
| Mombasa          | 1957        | 0.91<br>(0.8–1.01)  |
| Mombasa          | 1958        | 0.91<br>(0.81–1.02) |
| Mombasa          | 1959        | 0.91<br>(0.8–1.02)  |
| Mombasa          | 1960        | 0.91<br>(0.81–1.03) |
| Mombasa          | 1961        | 0.92<br>(0.81–1.03) |
| Mombasa          | 1962        | 0.92<br>(0.81–1.05) |
| Mombasa          | 1963        | 0.93<br>(0.82–1.07) |
| Mombasa          | 1964        | 0.95<br>(0.83–1.08) |
| Mombasa          | 1965        | 0.95<br>(0.83–1.09) |
| Mombasa          | 1966        | 0.96<br>(0.85–1.1)  |
| Mombasa          | 1967        | 0.98<br>(0.86–1.12) |
| Mombasa          | 1968        | 0.98<br>(0.87–1.11) |
| Mombasa          | 1969        | 0.99<br>(0.88–1.12) |
| Mombasa          | 1970        | 1.0<br>(0.89–1.12)  |
| Mombasa          | 1971        | 1.01<br>(0.9–1.13)  |
| Mombasa          | 1972        | 1.01<br>(0.89–1.13) |
| Mombasa          | 1973        | 1.0<br>(0.89–1.11)  |
| Mombasa          | 1974        | 0.99<br>(0.89–1.1)  |
| Mombasa          | 1975        | 0.99<br>(0.89–1.09) |
| Mombasa          | 1976        | 0.99<br>(0.88–1.1)  |
| Mombasa          | 1977        | 0.99<br>(0.88–1.09) |

**Table 15 Ratio of adjusted to unadjusted 5q0 values for scaled locations by year**

| <b>Geography</b> | <b>Year</b> | <b>Ratio</b>        |
|------------------|-------------|---------------------|
| Mombasa          | 1978        | 0.99<br>(0.89–1.09) |
| Mombasa          | 1979        | 0.99<br>(0.89–1.09) |
| Mombasa          | 1980        | 0.99<br>(0.88–1.11) |
| Mombasa          | 1981        | 0.99<br>(0.88–1.11) |
| Mombasa          | 1982        | 0.99<br>(0.88–1.11) |
| Mombasa          | 1983        | 1.0<br>(0.88–1.12)  |
| Mombasa          | 1984        | 1.0<br>(0.89–1.13)  |
| Mombasa          | 1985        | 1.0<br>(0.9–1.12)   |
| Mombasa          | 1986        | 1.01<br>(0.9–1.13)  |
| Mombasa          | 1987        | 1.02<br>(0.9–1.15)  |
| Mombasa          | 1988        | 1.02<br>(0.91–1.16) |
| Mombasa          | 1989        | 1.03<br>(0.91–1.16) |
| Mombasa          | 1990        | 1.03<br>(0.91–1.17) |
| Mombasa          | 1991        | 1.04<br>(0.92–1.18) |
| Mombasa          | 1992        | 1.05<br>(0.93–1.19) |
| Mombasa          | 1993        | 1.06<br>(0.95–1.19) |
| Mombasa          | 1994        | 1.06<br>(0.95–1.19) |
| Mombasa          | 1995        | 1.07<br>(0.96–1.19) |
| Mombasa          | 1996        | 1.07<br>(0.97–1.18) |
| Mombasa          | 1997        | 1.07<br>(0.97–1.17) |
| Mombasa          | 1998        | 1.07<br>(0.98–1.16) |
| Mombasa          | 1999        | 1.06<br>(0.98–1.15) |
| Mombasa          | 2000        | 1.06<br>(0.97–1.15) |
| Mombasa          | 2001        | 1.06<br>(0.96–1.17) |
| Mombasa          | 2002        | 1.05<br>(0.94–1.17) |
| Mombasa          | 2003        | 1.03<br>(0.92–1.16) |
| Mombasa          | 2004        | 1.02<br>(0.91–1.15) |
| Mombasa          | 2005        | 1.0<br>(0.88–1.14)  |
| Mombasa          | 2006        | 0.99<br>(0.87–1.13) |
| Mombasa          | 2007        | 0.99<br>(0.87–1.13) |
| Mombasa          | 2008        | 1.0<br>(0.86–1.13)  |

**Table 15 Ratio of adjusted to unadjusted 5q0 values for scaled locations by year**

| <b>Geography</b> | <b>Year</b> | <b>Ratio</b>        |
|------------------|-------------|---------------------|
| Mombasa          | 2009        | 1.01<br>(0.86–1.17) |
| Mombasa          | 2010        | 1.01<br>(0.87–1.18) |
| Mombasa          | 2011        | 1.01<br>(0.86–1.17) |
| Mombasa          | 2012        | 1.01<br>(0.87–1.16) |
| Mombasa          | 2013        | 1.0<br>(0.87–1.14)  |
| Mombasa          | 2014        | 1.0<br>(0.88–1.1)   |
| Mombasa          | 2015        | 1.0<br>(0.91–1.09)  |
| Mombasa          | 2016        | 1.0<br>(0.94–1.05)  |
| Mombasa          | 2017        | 0.99<br>(0.98–1.0)  |
| Murang'a         | 1950        | 0.45<br>(0.44–0.45) |
| Murang'a         | 1951        | 0.46<br>(0.44–0.48) |
| Murang'a         | 1952        | 0.46<br>(0.44–0.49) |
| Murang'a         | 1953        | 0.47<br>(0.44–0.5)  |
| Murang'a         | 1954        | 0.48<br>(0.45–0.51) |
| Murang'a         | 1955        | 0.49<br>(0.45–0.52) |
| Murang'a         | 1956        | 0.5<br>(0.45–0.54)  |
| Murang'a         | 1957        | 0.5<br>(0.45–0.57)  |
| Murang'a         | 1958        | 0.51<br>(0.45–0.58) |
| Murang'a         | 1959        | 0.52<br>(0.45–0.59) |
| Murang'a         | 1960        | 0.53<br>(0.46–0.6)  |
| Murang'a         | 1961        | 0.54<br>(0.47–0.6)  |
| Murang'a         | 1962        | 0.55<br>(0.49–0.61) |
| Murang'a         | 1963        | 0.56<br>(0.5–0.63)  |
| Murang'a         | 1964        | 0.58<br>(0.51–0.65) |
| Murang'a         | 1965        | 0.6<br>(0.52–0.68)  |
| Murang'a         | 1966        | 0.63<br>(0.55–0.72) |
| Murang'a         | 1967        | 0.66<br>(0.57–0.75) |
| Murang'a         | 1968        | 0.69<br>(0.6–0.78)  |
| Murang'a         | 1969        | 0.72<br>(0.62–0.82) |
| Murang'a         | 1970        | 0.75<br>(0.66–0.85) |
| Murang'a         | 1971        | 0.78<br>(0.69–0.87) |



**Table 15 Ratio of adjusted to unadjusted 5q0 values for scaled locations by year**

| <b>Geography</b> | <b>Year</b> | <b>Ratio</b>        |
|------------------|-------------|---------------------|
| Murang'a         | 1972        | 0.81<br>(0.73–0.89) |
| Murang'a         | 1973        | 0.83<br>(0.76–0.9)  |
| Murang'a         | 1974        | 0.85<br>(0.79–0.92) |
| Murang'a         | 1975        | 0.87<br>(0.8–0.95)  |
| Murang'a         | 1976        | 0.89<br>(0.8–0.97)  |
| Murang'a         | 1977        | 0.88<br>(0.79–0.98) |
| Murang'a         | 1978        | 0.89<br>(0.79–0.98) |
| Murang'a         | 1979        | 0.89<br>(0.8–0.99)  |
| Murang'a         | 1980        | 0.89<br>(0.8–0.99)  |
| Murang'a         | 1981        | 0.88<br>(0.8–0.96)  |
| Murang'a         | 1982        | 0.87<br>(0.8–0.95)  |
| Murang'a         | 1983        | 0.88<br>(0.8–0.97)  |
| Murang'a         | 1984        | 0.88<br>(0.79–0.99) |
| Murang'a         | 1985        | 0.89<br>(0.79–1.01) |
| Murang'a         | 1986        | 0.9<br>(0.78–1.04)  |
| Murang'a         | 1987        | 0.91<br>(0.78–1.06) |
| Murang'a         | 1988        | 0.92<br>(0.78–1.07) |
| Murang'a         | 1989        | 0.93<br>(0.79–1.1)  |
| Murang'a         | 1990        | 0.94<br>(0.8–1.09)  |
| Murang'a         | 1991        | 0.95<br>(0.81–1.08) |
| Murang'a         | 1992        | 0.96<br>(0.84–1.07) |
| Murang'a         | 1993        | 0.97<br>(0.86–1.09) |
| Murang'a         | 1994        | 0.98<br>(0.88–1.1)  |
| Murang'a         | 1995        | 0.98<br>(0.87–1.1)  |
| Murang'a         | 1996        | 0.98<br>(0.86–1.11) |
| Murang'a         | 1997        | 0.99<br>(0.85–1.15) |
| Murang'a         | 1998        | 0.99<br>(0.84–1.16) |
| Murang'a         | 1999        | 0.99<br>(0.83–1.17) |
| Murang'a         | 2000        | 0.99<br>(0.83–1.18) |
| Murang'a         | 2001        | 0.98<br>(0.83–1.15) |
| Murang'a         | 2002        | 0.96<br>(0.83–1.12) |

**Table 15 Ratio of adjusted to unadjusted 5q0 values for scaled locations by year**

| <b>Geography</b> | <b>Year</b> | <b>Ratio</b>        |
|------------------|-------------|---------------------|
| Murang'a         | 2003        | 0.95<br>(0.83–1.09) |
| Murang'a         | 2004        | 0.93<br>(0.83–1.05) |
| Murang'a         | 2005        | 0.92<br>(0.82–1.03) |
| Murang'a         | 2006        | 0.91<br>(0.8–1.03)  |
| Murang'a         | 2007        | 0.91<br>(0.78–1.06) |
| Murang'a         | 2008        | 0.92<br>(0.77–1.09) |
| Murang'a         | 2009        | 0.93<br>(0.77–1.11) |
| Murang'a         | 2010        | 0.93<br>(0.78–1.11) |
| Murang'a         | 2011        | 0.94<br>(0.79–1.1)  |
| Murang'a         | 2012        | 0.93<br>(0.8–1.08)  |
| Murang'a         | 2013        | 0.92<br>(0.81–1.06) |
| Murang'a         | 2014        | 0.92<br>(0.82–1.02) |
| Murang'a         | 2015        | 0.92<br>(0.84–1.02) |
| Murang'a         | 2016        | 0.93<br>(0.87–0.99) |
| Murang'a         | 2017        | 0.93<br>(0.91–0.94) |
| Nairobi          | 1950        | 1.48<br>(1.42–1.53) |
| Nairobi          | 1951        | 1.47<br>(1.38–1.57) |
| Nairobi          | 1952        | 1.46<br>(1.34–1.58) |
| Nairobi          | 1953        | 1.43<br>(1.3–1.56)  |
| Nairobi          | 1954        | 1.39<br>(1.27–1.51) |
| Nairobi          | 1955        | 1.36<br>(1.25–1.47) |
| Nairobi          | 1956        | 1.32<br>(1.18–1.46) |
| Nairobi          | 1957        | 1.28<br>(1.13–1.44) |
| Nairobi          | 1958        | 1.24<br>(1.08–1.41) |
| Nairobi          | 1959        | 1.21<br>(1.04–1.38) |
| Nairobi          | 1960        | 1.18<br>(1.03–1.35) |
| Nairobi          | 1961        | 1.15<br>(1.0–1.3)   |
| Nairobi          | 1962        | 1.13<br>(0.99–1.29) |
| Nairobi          | 1963        | 1.12<br>(0.97–1.27) |
| Nairobi          | 1964        | 1.12<br>(0.97–1.28) |
| Nairobi          | 1965        | 1.12<br>(0.96–1.28) |

**Table 15 Ratio of adjusted to unadjusted 5q0 values for scaled locations by year**

| <b>Geography</b> | <b>Year</b> | <b>Ratio</b>        |
|------------------|-------------|---------------------|
| Nairobi          | 1966        | 1.12<br>(0.97–1.29) |
| Nairobi          | 1967        | 1.13<br>(0.98–1.3)  |
| Nairobi          | 1968        | 1.13<br>(0.97–1.3)  |
| Nairobi          | 1969        | 1.12<br>(0.96–1.3)  |
| Nairobi          | 1970        | 1.11<br>(0.96–1.26) |
| Nairobi          | 1971        | 1.1<br>(0.95–1.25)  |
| Nairobi          | 1972        | 1.08<br>(0.96–1.22) |
| Nairobi          | 1973        | 1.07<br>(0.96–1.2)  |
| Nairobi          | 1974        | 1.05<br>(0.93–1.17) |
| Nairobi          | 1975        | 1.03<br>(0.92–1.14) |
| Nairobi          | 1976        | 1.01<br>(0.9–1.12)  |
| Nairobi          | 1977        | 1.0<br>(0.89–1.12)  |
| Nairobi          | 1978        | 0.99<br>(0.88–1.11) |
| Nairobi          | 1979        | 0.98<br>(0.86–1.12) |
| Nairobi          | 1980        | 0.98<br>(0.85–1.13) |
| Nairobi          | 1981        | 0.97<br>(0.85–1.11) |
| Nairobi          | 1982        | 0.96<br>(0.83–1.1)  |
| Nairobi          | 1983        | 0.94<br>(0.83–1.07) |
| Nairobi          | 1984        | 0.93<br>(0.82–1.03) |
| Nairobi          | 1985        | 0.92<br>(0.82–1.02) |
| Nairobi          | 1986        | 0.92<br>(0.82–1.03) |
| Nairobi          | 1987        | 0.93<br>(0.81–1.06) |
| Nairobi          | 1988        | 0.94<br>(0.8–1.08)  |
| Nairobi          | 1989        | 0.95<br>(0.79–1.1)  |
| Nairobi          | 1990        | 0.96<br>(0.8–1.14)  |
| Nairobi          | 1991        | 0.97<br>(0.82–1.15) |
| Nairobi          | 1992        | 0.98<br>(0.83–1.12) |
| Nairobi          | 1993        | 0.97<br>(0.85–1.1)  |
| Nairobi          | 1994        | 0.97<br>(0.85–1.08) |
| Nairobi          | 1995        | 0.95<br>(0.85–1.06) |
| Nairobi          | 1996        | 0.95<br>(0.85–1.06) |

**Table 15 Ratio of adjusted to unadjusted 5q0 values for scaled locations by year**

| <b>Geography</b> | <b>Year</b> | <b>Ratio</b>        |
|------------------|-------------|---------------------|
| Nairobi          | 1997        | 0.94<br>(0.84–1.04) |
| Nairobi          | 1998        | 0.92<br>(0.82–1.02) |
| Nairobi          | 1999        | 0.9<br>(0.8–1.02)   |
| Nairobi          | 2000        | 0.89<br>(0.78–1.03) |
| Nairobi          | 2001        | 0.88<br>(0.77–1.01) |
| Nairobi          | 2002        | 0.86<br>(0.76–0.99) |
| Nairobi          | 2003        | 0.84<br>(0.73–0.97) |
| Nairobi          | 2004        | 0.81<br>(0.7–0.94)  |
| Nairobi          | 2005        | 0.78<br>(0.68–0.89) |
| Nairobi          | 2006        | 0.75<br>(0.66–0.86) |
| Nairobi          | 2007        | 0.72<br>(0.63–0.82) |
| Nairobi          | 2008        | 0.71<br>(0.61–0.82) |
| Nairobi          | 2009        | 0.73<br>(0.62–0.86) |
| Nairobi          | 2010        | 0.73<br>(0.62–0.87) |
| Nairobi          | 2011        | 0.73<br>(0.61–0.86) |
| Nairobi          | 2012        | 0.73<br>(0.62–0.86) |
| Nairobi          | 2013        | 0.72<br>(0.62–0.84) |
| Nairobi          | 2014        | 0.72<br>(0.63–0.82) |
| Nairobi          | 2015        | 0.72<br>(0.65–0.81) |
| Nairobi          | 2016        | 0.73<br>(0.68–0.79) |
| Nairobi          | 2017        | 0.73<br>(0.72–0.75) |
| Nakuru           | 1950        | 0.26<br>(0.25–0.26) |
| Nakuru           | 1951        | 0.26<br>(0.25–0.28) |
| Nakuru           | 1952        | 0.27<br>(0.25–0.29) |
| Nakuru           | 1953        | 0.27<br>(0.25–0.29) |
| Nakuru           | 1954        | 0.27<br>(0.25–0.3)  |
| Nakuru           | 1955        | 0.28<br>(0.25–0.31) |
| Nakuru           | 1956        | 0.28<br>(0.26–0.32) |
| Nakuru           | 1957        | 0.29<br>(0.26–0.33) |
| Nakuru           | 1958        | 0.29<br>(0.26–0.33) |
| Nakuru           | 1959        | 0.3<br>(0.26–0.34)  |

**Table 15 Ratio of adjusted to unadjusted 5q0 values for scaled locations by year**

| <b>Geography</b> | <b>Year</b> | <b>Ratio</b>        |
|------------------|-------------|---------------------|
| Nakuru           | 1960        | 0.3<br>(0.27–0.35)  |
| Nakuru           | 1961        | 0.31<br>(0.27–0.35) |
| Nakuru           | 1962        | 0.32<br>(0.28–0.36) |
| Nakuru           | 1963        | 0.33<br>(0.29–0.36) |
| Nakuru           | 1964        | 0.34<br>(0.3–0.37)  |
| Nakuru           | 1965        | 0.35<br>(0.31–0.39) |
| Nakuru           | 1966        | 0.37<br>(0.32–0.42) |
| Nakuru           | 1967        | 0.39<br>(0.34–0.44) |
| Nakuru           | 1968        | 0.42<br>(0.37–0.47) |
| Nakuru           | 1969        | 0.44<br>(0.39–0.49) |
| Nakuru           | 1970        | 0.47<br>(0.42–0.52) |
| Nakuru           | 1971        | 0.49<br>(0.44–0.55) |
| Nakuru           | 1972        | 0.52<br>(0.47–0.57) |
| Nakuru           | 1973        | 0.55<br>(0.5–0.6)   |
| Nakuru           | 1974        | 0.57<br>(0.52–0.63) |
| Nakuru           | 1975        | 0.6<br>(0.54–0.66)  |
| Nakuru           | 1976        | 0.63<br>(0.56–0.7)  |
| Nakuru           | 1977        | 0.65<br>(0.57–0.73) |
| Nakuru           | 1978        | 0.68<br>(0.59–0.77) |
| Nakuru           | 1979        | 0.7<br>(0.6–0.81)   |
| Nakuru           | 1980        | 0.72<br>(0.61–0.83) |
| Nakuru           | 1981        | 0.73<br>(0.63–0.85) |
| Nakuru           | 1982        | 0.75<br>(0.65–0.86) |
| Nakuru           | 1983        | 0.76<br>(0.67–0.87) |
| Nakuru           | 1984        | 0.78<br>(0.69–0.87) |
| Nakuru           | 1985        | 0.79<br>(0.71–0.88) |
| Nakuru           | 1986        | 0.8<br>(0.73–0.87)  |
| Nakuru           | 1987        | 0.81<br>(0.73–0.89) |
| Nakuru           | 1988        | 0.82<br>(0.74–0.91) |
| Nakuru           | 1989        | 0.84<br>(0.74–0.94) |
| Nakuru           | 1990        | 0.86<br>(0.75–0.97) |

**Table 15 Ratio of adjusted to unadjusted 5q0 values for scaled locations by year**

| <b>Geography</b> | <b>Year</b> | <b>Ratio</b>        |
|------------------|-------------|---------------------|
| Nakuru           | 1991        | 0.87<br>(0.76–0.99) |
| Nakuru           | 1992        | 0.9<br>(0.78–1.01)  |
| Nakuru           | 1993        | 0.92<br>(0.81–1.02) |
| Nakuru           | 1994        | 0.94<br>(0.84–1.03) |
| Nakuru           | 1995        | 0.96<br>(0.87–1.05) |
| Nakuru           | 1996        | 0.97<br>(0.88–1.06) |
| Nakuru           | 1997        | 0.98<br>(0.88–1.09) |
| Nakuru           | 1998        | 0.99<br>(0.87–1.11) |
| Nakuru           | 1999        | 0.99<br>(0.86–1.13) |
| Nakuru           | 2000        | 0.99<br>(0.85–1.13) |
| Nakuru           | 2001        | 0.99<br>(0.86–1.14) |
| Nakuru           | 2002        | 0.99<br>(0.86–1.13) |
| Nakuru           | 2003        | 0.98<br>(0.86–1.12) |
| Nakuru           | 2004        | 0.98<br>(0.86–1.1)  |
| Nakuru           | 2005        | 0.98<br>(0.87–1.1)  |
| Nakuru           | 2006        | 0.98<br>(0.87–1.1)  |
| Nakuru           | 2007        | 0.97<br>(0.86–1.11) |
| Nakuru           | 2008        | 0.98<br>(0.85–1.13) |
| Nakuru           | 2009        | 0.99<br>(0.85–1.13) |
| Nakuru           | 2010        | 0.99<br>(0.85–1.12) |
| Nakuru           | 2011        | 0.98<br>(0.85–1.12) |
| Nakuru           | 2012        | 0.98<br>(0.85–1.12) |
| Nakuru           | 2013        | 0.99<br>(0.86–1.13) |
| Nakuru           | 2014        | 1.0<br>(0.89–1.11)  |
| Nakuru           | 2015        | 1.0<br>(0.92–1.09)  |
| Nakuru           | 2016        | 1.01<br>(0.95–1.07) |
| Nakuru           | 2017        | 1.0<br>(0.99–1.02)  |
| Nandi            | 1950        | 0.25<br>(0.25–0.25) |
| Nandi            | 1951        | 0.25<br>(0.24–0.27) |
| Nandi            | 1952        | 0.26<br>(0.24–0.28) |
| Nandi            | 1953        | 0.26<br>(0.24–0.29) |

**Table 15 Ratio of adjusted to unadjusted 5q0 values for scaled locations by year**

| <b>Geography</b> | <b>Year</b> | <b>Ratio</b>        |
|------------------|-------------|---------------------|
| Nandi            | 1954        | 0.27<br>(0.24–0.29) |
| Nandi            | 1955        | 0.27<br>(0.25–0.3)  |
| Nandi            | 1956        | 0.28<br>(0.25–0.32) |
| Nandi            | 1957        | 0.28<br>(0.25–0.32) |
| Nandi            | 1958        | 0.29<br>(0.25–0.33) |
| Nandi            | 1959        | 0.29<br>(0.26–0.34) |
| Nandi            | 1960        | 0.3<br>(0.26–0.34)  |
| Nandi            | 1961        | 0.31<br>(0.27–0.35) |
| Nandi            | 1962        | 0.31<br>(0.28–0.35) |
| Nandi            | 1963        | 0.32<br>(0.29–0.36) |
| Nandi            | 1964        | 0.33<br>(0.3–0.37)  |
| Nandi            | 1965        | 0.35<br>(0.31–0.39) |
| Nandi            | 1966        | 0.37<br>(0.32–0.42) |
| Nandi            | 1967        | 0.39<br>(0.34–0.44) |
| Nandi            | 1968        | 0.41<br>(0.36–0.47) |
| Nandi            | 1969        | 0.44<br>(0.39–0.49) |
| Nandi            | 1970        | 0.47<br>(0.42–0.52) |
| Nandi            | 1971        | 0.49<br>(0.44–0.55) |
| Nandi            | 1972        | 0.52<br>(0.47–0.57) |
| Nandi            | 1973        | 0.55<br>(0.5–0.6)   |
| Nandi            | 1974        | 0.57<br>(0.52–0.63) |
| Nandi            | 1975        | 0.6<br>(0.54–0.66)  |
| Nandi            | 1976        | 0.63<br>(0.56–0.7)  |
| Nandi            | 1977        | 0.65<br>(0.57–0.73) |
| Nandi            | 1978        | 0.68<br>(0.59–0.77) |
| Nandi            | 1979        | 0.7<br>(0.6–0.81)   |
| Nandi            | 1980        | 0.72<br>(0.62–0.83) |
| Nandi            | 1981        | 0.74<br>(0.63–0.85) |
| Nandi            | 1982        | 0.75<br>(0.65–0.86) |
| Nandi            | 1983        | 0.77<br>(0.67–0.87) |
| Nandi            | 1984        | 0.78<br>(0.69–0.88) |

**Table 15 Ratio of adjusted to unadjusted 5q0 values for scaled locations by year**

| <b>Geography</b> | <b>Year</b> | <b>Ratio</b>        |
|------------------|-------------|---------------------|
| Nandi            | 1985        | 0.79<br>(0.71–0.88) |
| Nandi            | 1986        | 0.8<br>(0.73–0.88)  |
| Nandi            | 1987        | 0.81<br>(0.73–0.89) |
| Nandi            | 1988        | 0.82<br>(0.74–0.91) |
| Nandi            | 1989        | 0.84<br>(0.74–0.94) |
| Nandi            | 1990        | 0.86<br>(0.75–0.97) |
| Nandi            | 1991        | 0.87<br>(0.76–0.99) |
| Nandi            | 1992        | 0.9<br>(0.78–1.01)  |
| Nandi            | 1993        | 0.92<br>(0.81–1.02) |
| Nandi            | 1994        | 0.94<br>(0.84–1.03) |
| Nandi            | 1995        | 0.96<br>(0.87–1.05) |
| Nandi            | 1996        | 0.97<br>(0.88–1.07) |
| Nandi            | 1997        | 0.98<br>(0.88–1.09) |
| Nandi            | 1998        | 0.99<br>(0.87–1.11) |
| Nandi            | 1999        | 0.99<br>(0.86–1.13) |
| Nandi            | 2000        | 0.99<br>(0.85–1.13) |
| Nandi            | 2001        | 0.99<br>(0.86–1.15) |
| Nandi            | 2002        | 0.99<br>(0.85–1.13) |
| Nandi            | 2003        | 0.98<br>(0.86–1.12) |
| Nandi            | 2004        | 0.98<br>(0.86–1.1)  |
| Nandi            | 2005        | 0.98<br>(0.87–1.1)  |
| Nandi            | 2006        | 0.98<br>(0.87–1.1)  |
| Nandi            | 2007        | 0.97<br>(0.86–1.11) |
| Nandi            | 2008        | 0.98<br>(0.85–1.13) |
| Nandi            | 2009        | 0.99<br>(0.85–1.13) |
| Nandi            | 2010        | 0.99<br>(0.85–1.12) |
| Nandi            | 2011        | 0.98<br>(0.85–1.12) |
| Nandi            | 2012        | 0.98<br>(0.85–1.13) |
| Nandi            | 2013        | 0.99<br>(0.86–1.13) |
| Nandi            | 2014        | 1.0<br>(0.89–1.11)  |
| Nandi            | 2015        | 1.0<br>(0.91–1.09)  |



**Table 15 Ratio of adjusted to unadjusted 5q0 values for scaled locations by year**

| <b>Geography</b> | <b>Year</b> | <b>Ratio</b>        |
|------------------|-------------|---------------------|
| Nandi            | 2016        | 1.01<br>(0.95–1.07) |
| Nandi            | 2017        | 1.0<br>(0.99–1.02)  |
| Narok            | 1950        | 0.25<br>(0.25–0.26) |
| Narok            | 1951        | 0.26<br>(0.25–0.27) |
| Narok            | 1952        | 0.26<br>(0.25–0.28) |
| Narok            | 1953        | 0.27<br>(0.25–0.29) |
| Narok            | 1954        | 0.27<br>(0.25–0.3)  |
| Narok            | 1955        | 0.28<br>(0.25–0.31) |
| Narok            | 1956        | 0.28<br>(0.25–0.32) |
| Narok            | 1957        | 0.29<br>(0.25–0.33) |
| Narok            | 1958        | 0.29<br>(0.26–0.33) |
| Narok            | 1959        | 0.3<br>(0.26–0.34)  |
| Narok            | 1960        | 0.31<br>(0.27–0.35) |
| Narok            | 1961        | 0.31<br>(0.28–0.35) |
| Narok            | 1962        | 0.32<br>(0.29–0.36) |
| Narok            | 1963        | 0.33<br>(0.3–0.36)  |
| Narok            | 1964        | 0.34<br>(0.3–0.38)  |
| Narok            | 1965        | 0.35<br>(0.31–0.4)  |
| Narok            | 1966        | 0.37<br>(0.33–0.42) |
| Narok            | 1967        | 0.39<br>(0.35–0.45) |
| Narok            | 1968        | 0.42<br>(0.37–0.48) |
| Narok            | 1969        | 0.44<br>(0.39–0.5)  |
| Narok            | 1970        | 0.47<br>(0.42–0.53) |
| Narok            | 1971        | 0.5<br>(0.45–0.55)  |
| Narok            | 1972        | 0.52<br>(0.48–0.57) |
| Narok            | 1973        | 0.55<br>(0.5–0.61)  |
| Narok            | 1974        | 0.58<br>(0.52–0.64) |
| Narok            | 1975        | 0.61<br>(0.55–0.67) |
| Narok            | 1976        | 0.63<br>(0.56–0.71) |
| Narok            | 1977        | 0.66<br>(0.58–0.74) |
| Narok            | 1978        | 0.68<br>(0.59–0.78) |

**Table 15 Ratio of adjusted to unadjusted 5q0 values for scaled locations by year**

| <b>Geography</b> | <b>Year</b> | <b>Ratio</b>        |
|------------------|-------------|---------------------|
| Narok            | 1979        | 0.71<br>(0.61–0.81) |
| Narok            | 1980        | 0.72<br>(0.62–0.83) |
| Narok            | 1981        | 0.74<br>(0.64–0.85) |
| Narok            | 1982        | 0.75<br>(0.66–0.86) |
| Narok            | 1983        | 0.77<br>(0.68–0.87) |
| Narok            | 1984        | 0.78<br>(0.69–0.88) |
| Narok            | 1985        | 0.79<br>(0.71–0.88) |
| Narok            | 1986        | 0.8<br>(0.73–0.88)  |
| Narok            | 1987        | 0.81<br>(0.74–0.89) |
| Narok            | 1988        | 0.83<br>(0.74–0.91) |
| Narok            | 1989        | 0.84<br>(0.75–0.94) |
| Narok            | 1990        | 0.86<br>(0.75–0.97) |
| Narok            | 1991        | 0.88<br>(0.76–0.99) |
| Narok            | 1992        | 0.9<br>(0.78–1.01)  |
| Narok            | 1993        | 0.92<br>(0.81–1.02) |
| Narok            | 1994        | 0.94<br>(0.84–1.03) |
| Narok            | 1995        | 0.96<br>(0.87–1.05) |
| Narok            | 1996        | 0.97<br>(0.88–1.06) |
| Narok            | 1997        | 0.98<br>(0.88–1.09) |
| Narok            | 1998        | 0.99<br>(0.87–1.11) |
| Narok            | 1999        | 0.99<br>(0.86–1.13) |
| Narok            | 2000        | 0.99<br>(0.85–1.13) |
| Narok            | 2001        | 0.99<br>(0.86–1.14) |
| Narok            | 2002        | 0.99<br>(0.85–1.13) |
| Narok            | 2003        | 0.98<br>(0.86–1.12) |
| Narok            | 2004        | 0.98<br>(0.86–1.1)  |
| Narok            | 2005        | 0.98<br>(0.87–1.1)  |
| Narok            | 2006        | 0.98<br>(0.87–1.1)  |
| Narok            | 2007        | 0.97<br>(0.86–1.11) |
| Narok            | 2008        | 0.98<br>(0.85–1.13) |
| Narok            | 2009        | 0.99<br>(0.85–1.13) |

**Table 15 Ratio of adjusted to unadjusted 5q0 values for scaled locations by year**

| <b>Geography</b> | <b>Year</b> | <b>Ratio</b>        |
|------------------|-------------|---------------------|
| Narok            | 2010        | 0.99<br>(0.85–1.12) |
| Narok            | 2011        | 0.98<br>(0.85–1.12) |
| Narok            | 2012        | 0.98<br>(0.85–1.13) |
| Narok            | 2013        | 0.99<br>(0.86–1.13) |
| Narok            | 2014        | 1.0<br>(0.89–1.11)  |
| Narok            | 2015        | 1.0<br>(0.91–1.09)  |
| Narok            | 2016        | 1.01<br>(0.95–1.07) |
| Narok            | 2017        | 1.0<br>(0.99–1.02)  |
| Nyamira          | 1950        | 0.72<br>(0.64–0.79) |
| Nyamira          | 1951        | 0.72<br>(0.63–0.8)  |
| Nyamira          | 1952        | 0.72<br>(0.63–0.8)  |
| Nyamira          | 1953        | 0.71<br>(0.62–0.8)  |
| Nyamira          | 1954        | 0.7<br>(0.61–0.8)   |
| Nyamira          | 1955        | 0.7<br>(0.61–0.8)   |
| Nyamira          | 1956        | 0.7<br>(0.61–0.8)   |
| Nyamira          | 1957        | 0.7<br>(0.61–0.8)   |
| Nyamira          | 1958        | 0.69<br>(0.61–0.79) |
| Nyamira          | 1959        | 0.7<br>(0.62–0.78)  |
| Nyamira          | 1960        | 0.7<br>(0.62–0.78)  |
| Nyamira          | 1961        | 0.7<br>(0.63–0.78)  |
| Nyamira          | 1962        | 0.71<br>(0.63–0.79) |
| Nyamira          | 1963        | 0.72<br>(0.64–0.8)  |
| Nyamira          | 1964        | 0.73<br>(0.65–0.81) |
| Nyamira          | 1965        | 0.74<br>(0.66–0.82) |
| Nyamira          | 1966        | 0.75<br>(0.67–0.84) |
| Nyamira          | 1967        | 0.76<br>(0.68–0.85) |
| Nyamira          | 1968        | 0.78<br>(0.7–0.87)  |
| Nyamira          | 1969        | 0.79<br>(0.71–0.88) |
| Nyamira          | 1970        | 0.81<br>(0.73–0.9)  |
| Nyamira          | 1971        | 0.82<br>(0.74–0.91) |
| Nyamira          | 1972        | 0.84<br>(0.76–0.93) |

**Table 15 Ratio of adjusted to unadjusted 5q0 values for scaled locations by year**

| <b>Geography</b> | <b>Year</b> | <b>Ratio</b>        |
|------------------|-------------|---------------------|
| Nyamira          | 1973        | 0.85<br>(0.77–0.94) |
| Nyamira          | 1974        | 0.87<br>(0.78–0.96) |
| Nyamira          | 1975        | 0.88<br>(0.78–0.98) |
| Nyamira          | 1976        | 0.9<br>(0.8–1.0)    |
| Nyamira          | 1977        | 0.91<br>(0.8–1.01)  |
| Nyamira          | 1978        | 0.92<br>(0.83–1.01) |
| Nyamira          | 1979        | 0.92<br>(0.83–1.01) |
| Nyamira          | 1980        | 0.92<br>(0.84–1.01) |
| Nyamira          | 1981        | 0.93<br>(0.85–1.01) |
| Nyamira          | 1982        | 0.93<br>(0.84–1.02) |
| Nyamira          | 1983        | 0.93<br>(0.84–1.01) |
| Nyamira          | 1984        | 0.92<br>(0.84–1.0)  |
| Nyamira          | 1985        | 0.91<br>(0.83–0.99) |
| Nyamira          | 1986        | 0.9<br>(0.83–0.98)  |
| Nyamira          | 1987        | 0.9<br>(0.83–0.97)  |
| Nyamira          | 1988        | 0.9<br>(0.84–0.96)  |
| Nyamira          | 1989        | 0.9<br>(0.84–0.97)  |
| Nyamira          | 1990        | 0.9<br>(0.84–0.97)  |
| Nyamira          | 1991        | 0.91<br>(0.84–0.98) |
| Nyamira          | 1992        | 0.92<br>(0.84–0.99) |
| Nyamira          | 1993        | 0.93<br>(0.86–1.0)  |
| Nyamira          | 1994        | 0.94<br>(0.86–1.02) |
| Nyamira          | 1995        | 0.95<br>(0.87–1.03) |
| Nyamira          | 1996        | 0.95<br>(0.87–1.05) |
| Nyamira          | 1997        | 0.96<br>(0.87–1.05) |
| Nyamira          | 1998        | 0.96<br>(0.88–1.05) |
| Nyamira          | 1999        | 0.95<br>(0.88–1.03) |
| Nyamira          | 2000        | 0.95<br>(0.88–1.03) |
| Nyamira          | 2001        | 0.95<br>(0.87–1.04) |
| Nyamira          | 2002        | 0.94<br>(0.85–1.03) |
| Nyamira          | 2003        | 0.93<br>(0.84–1.02) |

**Table 15 Ratio of adjusted to unadjusted 5q0 values for scaled locations by year**

| <b>Geography</b> | <b>Year</b> | <b>Ratio</b>        |
|------------------|-------------|---------------------|
| Nyamira          | 2004        | 0.92<br>(0.83–1.01) |
| Nyamira          | 2005        | 0.91<br>(0.83–1.01) |
| Nyamira          | 2006        | 0.9<br>(0.82–0.99)  |
| Nyamira          | 2007        | 0.9<br>(0.83–0.97)  |
| Nyamira          | 2008        | 0.9<br>(0.82–0.99)  |
| Nyamira          | 2009        | 0.91<br>(0.81–1.01) |
| Nyamira          | 2010        | 0.9<br>(0.8–1.02)   |
| Nyamira          | 2011        | 0.9<br>(0.78–1.03)  |
| Nyamira          | 2012        | 0.9<br>(0.78–1.03)  |
| Nyamira          | 2013        | 0.89<br>(0.78–1.02) |
| Nyamira          | 2014        | 0.89<br>(0.77–1.01) |
| Nyamira          | 2015        | 0.88<br>(0.77–1.01) |
| Nyamira          | 2016        | 0.88<br>(0.77–1.0)  |
| Nyamira          | 2017        | 0.88<br>(0.76–1.01) |
| Nyandarua        | 1950        | 0.43<br>(0.43–0.44) |
| Nyandarua        | 1951        | 0.44<br>(0.42–0.46) |
| Nyandarua        | 1952        | 0.45<br>(0.42–0.48) |
| Nyandarua        | 1953        | 0.46<br>(0.43–0.49) |
| Nyandarua        | 1954        | 0.47<br>(0.44–0.5)  |
| Nyandarua        | 1955        | 0.48<br>(0.44–0.51) |
| Nyandarua        | 1956        | 0.49<br>(0.44–0.53) |
| Nyandarua        | 1957        | 0.49<br>(0.44–0.56) |
| Nyandarua        | 1958        | 0.5<br>(0.44–0.57)  |
| Nyandarua        | 1959        | 0.51<br>(0.44–0.58) |
| Nyandarua        | 1960        | 0.52<br>(0.45–0.59) |
| Nyandarua        | 1961        | 0.53<br>(0.46–0.59) |
| Nyandarua        | 1962        | 0.54<br>(0.48–0.6)  |
| Nyandarua        | 1963        | 0.55<br>(0.49–0.62) |
| Nyandarua        | 1964        | 0.57<br>(0.5–0.64)  |
| Nyandarua        | 1965        | 0.59<br>(0.52–0.68) |
| Nyandarua        | 1966        | 0.62<br>(0.54–0.71) |

**Table 15 Ratio of adjusted to unadjusted 5q0 values for scaled locations by year**

| <b>Geography</b> | <b>Year</b> | <b>Ratio</b>        |
|------------------|-------------|---------------------|
| Nyandarua        | 1967        | 0.65<br>(0.57–0.74) |
| Nyandarua        | 1968        | 0.68<br>(0.6–0.78)  |
| Nyandarua        | 1969        | 0.71<br>(0.62–0.81) |
| Nyandarua        | 1970        | 0.75<br>(0.65–0.85) |
| Nyandarua        | 1971        | 0.78<br>(0.69–0.87) |
| Nyandarua        | 1972        | 0.8<br>(0.73–0.88)  |
| Nyandarua        | 1973        | 0.83<br>(0.76–0.9)  |
| Nyandarua        | 1974        | 0.85<br>(0.78–0.92) |
| Nyandarua        | 1975        | 0.87<br>(0.8–0.95)  |
| Nyandarua        | 1976        | 0.88<br>(0.8–0.97)  |
| Nyandarua        | 1977        | 0.88<br>(0.79–0.98) |
| Nyandarua        | 1978        | 0.88<br>(0.79–0.98) |
| Nyandarua        | 1979        | 0.89<br>(0.8–0.99)  |
| Nyandarua        | 1980        | 0.89<br>(0.8–0.99)  |
| Nyandarua        | 1981        | 0.88<br>(0.8–0.96)  |
| Nyandarua        | 1982        | 0.87<br>(0.8–0.95)  |
| Nyandarua        | 1983        | 0.88<br>(0.8–0.97)  |
| Nyandarua        | 1984        | 0.88<br>(0.79–0.99) |
| Nyandarua        | 1985        | 0.89<br>(0.79–1.01) |
| Nyandarua        | 1986        | 0.9<br>(0.78–1.04)  |
| Nyandarua        | 1987        | 0.91<br>(0.78–1.06) |
| Nyandarua        | 1988        | 0.92<br>(0.78–1.07) |
| Nyandarua        | 1989        | 0.93<br>(0.79–1.1)  |
| Nyandarua        | 1990        | 0.94<br>(0.8–1.09)  |
| Nyandarua        | 1991        | 0.95<br>(0.81–1.08) |
| Nyandarua        | 1992        | 0.96<br>(0.85–1.07) |
| Nyandarua        | 1993        | 0.97<br>(0.86–1.09) |
| Nyandarua        | 1994        | 0.98<br>(0.88–1.1)  |
| Nyandarua        | 1995        | 0.98<br>(0.87–1.1)  |
| Nyandarua        | 1996        | 0.98<br>(0.86–1.11) |
| Nyandarua        | 1997        | 0.99<br>(0.85–1.15) |

**Table 15 Ratio of adjusted to unadjusted 5q0 values for scaled locations by year**

| <b>Geography</b> | <b>Year</b> | <b>Ratio</b>        |
|------------------|-------------|---------------------|
| Nyandarua        | 1998        | 0.99<br>(0.84–1.16) |
| Nyandarua        | 1999        | 0.99<br>(0.83–1.17) |
| Nyandarua        | 2000        | 0.99<br>(0.83–1.18) |
| Nyandarua        | 2001        | 0.98<br>(0.83–1.15) |
| Nyandarua        | 2002        | 0.96<br>(0.83–1.12) |
| Nyandarua        | 2003        | 0.95<br>(0.83–1.09) |
| Nyandarua        | 2004        | 0.93<br>(0.83–1.05) |
| Nyandarua        | 2005        | 0.92<br>(0.82–1.03) |
| Nyandarua        | 2006        | 0.92<br>(0.8–1.03)  |
| Nyandarua        | 2007        | 0.91<br>(0.78–1.06) |
| Nyandarua        | 2008        | 0.92<br>(0.77–1.09) |
| Nyandarua        | 2009        | 0.93<br>(0.77–1.11) |
| Nyandarua        | 2010        | 0.93<br>(0.78–1.11) |
| Nyandarua        | 2011        | 0.94<br>(0.79–1.1)  |
| Nyandarua        | 2012        | 0.93<br>(0.8–1.08)  |
| Nyandarua        | 2013        | 0.92<br>(0.81–1.06) |
| Nyandarua        | 2014        | 0.92<br>(0.82–1.02) |
| Nyandarua        | 2015        | 0.92<br>(0.84–1.02) |
| Nyandarua        | 2016        | 0.93<br>(0.87–0.99) |
| Nyandarua        | 2017        | 0.93<br>(0.91–0.94) |
| Nyeri            | 1950        | 0.46<br>(0.45–0.46) |
| Nyeri            | 1951        | 0.46<br>(0.44–0.48) |
| Nyeri            | 1952        | 0.47<br>(0.44–0.5)  |
| Nyeri            | 1953        | 0.48<br>(0.44–0.51) |
| Nyeri            | 1954        | 0.48<br>(0.45–0.51) |
| Nyeri            | 1955        | 0.49<br>(0.45–0.52) |
| Nyeri            | 1956        | 0.5<br>(0.45–0.55)  |
| Nyeri            | 1957        | 0.5<br>(0.45–0.57)  |
| Nyeri            | 1958        | 0.51<br>(0.45–0.58) |
| Nyeri            | 1959        | 0.52<br>(0.45–0.59) |
| Nyeri            | 1960        | 0.53<br>(0.46–0.6)  |

**Table 15 Ratio of adjusted to unadjusted 5q0 values for scaled locations by year**

| <b>Geography</b> | <b>Year</b> | <b>Ratio</b>        |
|------------------|-------------|---------------------|
| Nyeri            | 1961        | 0.53<br>(0.47–0.6)  |
| Nyeri            | 1962        | 0.54<br>(0.49–0.61) |
| Nyeri            | 1963        | 0.56<br>(0.5–0.63)  |
| Nyeri            | 1964        | 0.58<br>(0.5–0.65)  |
| Nyeri            | 1965        | 0.6<br>(0.52–0.68)  |
| Nyeri            | 1966        | 0.62<br>(0.54–0.71) |
| Nyeri            | 1967        | 0.65<br>(0.57–0.74) |
| Nyeri            | 1968        | 0.68<br>(0.6–0.78)  |
| Nyeri            | 1969        | 0.71<br>(0.62–0.81) |
| Nyeri            | 1970        | 0.75<br>(0.65–0.85) |
| Nyeri            | 1971        | 0.78<br>(0.69–0.87) |
| Nyeri            | 1972        | 0.8<br>(0.73–0.88)  |
| Nyeri            | 1973        | 0.83<br>(0.76–0.9)  |
| Nyeri            | 1974        | 0.85<br>(0.78–0.92) |
| Nyeri            | 1975        | 0.87<br>(0.8–0.95)  |
| Nyeri            | 1976        | 0.88<br>(0.8–0.97)  |
| Nyeri            | 1977        | 0.88<br>(0.79–0.98) |
| Nyeri            | 1978        | 0.88<br>(0.79–0.98) |
| Nyeri            | 1979        | 0.89<br>(0.8–0.99)  |
| Nyeri            | 1980        | 0.89<br>(0.8–0.99)  |
| Nyeri            | 1981        | 0.88<br>(0.8–0.96)  |
| Nyeri            | 1982        | 0.87<br>(0.8–0.95)  |
| Nyeri            | 1983        | 0.88<br>(0.8–0.97)  |
| Nyeri            | 1984        | 0.88<br>(0.79–0.99) |
| Nyeri            | 1985        | 0.89<br>(0.79–1.01) |
| Nyeri            | 1986        | 0.9<br>(0.78–1.04)  |
| Nyeri            | 1987        | 0.91<br>(0.78–1.06) |
| Nyeri            | 1988        | 0.92<br>(0.78–1.07) |
| Nyeri            | 1989        | 0.93<br>(0.79–1.1)  |
| Nyeri            | 1990        | 0.94<br>(0.8–1.09)  |
| Nyeri            | 1991        | 0.95<br>(0.81–1.08) |



**Table 15 Ratio of adjusted to unadjusted 5q0 values for scaled locations by year**

| <b>Geography</b> | <b>Year</b> | <b>Ratio</b>        |
|------------------|-------------|---------------------|
| Nyeri            | 1992        | 0.96<br>(0.85–1.07) |
| Nyeri            | 1993        | 0.97<br>(0.86–1.09) |
| Nyeri            | 1994        | 0.98<br>(0.88–1.1)  |
| Nyeri            | 1995        | 0.98<br>(0.87–1.1)  |
| Nyeri            | 1996        | 0.98<br>(0.86–1.11) |
| Nyeri            | 1997        | 0.99<br>(0.85–1.14) |
| Nyeri            | 1998        | 0.99<br>(0.84–1.16) |
| Nyeri            | 1999        | 0.99<br>(0.83–1.17) |
| Nyeri            | 2000        | 0.99<br>(0.83–1.18) |
| Nyeri            | 2001        | 0.98<br>(0.83–1.15) |
| Nyeri            | 2002        | 0.96<br>(0.83–1.12) |
| Nyeri            | 2003        | 0.95<br>(0.83–1.09) |
| Nyeri            | 2004        | 0.93<br>(0.83–1.05) |
| Nyeri            | 2005        | 0.92<br>(0.82–1.03) |
| Nyeri            | 2006        | 0.91<br>(0.8–1.03)  |
| Nyeri            | 2007        | 0.91<br>(0.78–1.06) |
| Nyeri            | 2008        | 0.92<br>(0.77–1.09) |
| Nyeri            | 2009        | 0.93<br>(0.77–1.11) |
| Nyeri            | 2010        | 0.93<br>(0.78–1.11) |
| Nyeri            | 2011        | 0.94<br>(0.79–1.1)  |
| Nyeri            | 2012        | 0.93<br>(0.8–1.08)  |
| Nyeri            | 2013        | 0.92<br>(0.81–1.06) |
| Nyeri            | 2014        | 0.92<br>(0.82–1.02) |
| Nyeri            | 2015        | 0.92<br>(0.84–1.02) |
| Nyeri            | 2016        | 0.93<br>(0.87–0.99) |
| Nyeri            | 2017        | 0.93<br>(0.91–0.94) |
| Samburu          | 1950        | 0.25<br>(0.25–0.26) |
| Samburu          | 1951        | 0.26<br>(0.24–0.27) |
| Samburu          | 1952        | 0.26<br>(0.24–0.28) |
| Samburu          | 1953        | 0.27<br>(0.25–0.29) |
| Samburu          | 1954        | 0.27<br>(0.25–0.3)  |

**Table 15 Ratio of adjusted to unadjusted 5q0 values for scaled locations by year**

| <b>Geography</b> | <b>Year</b> | <b>Ratio</b>        |
|------------------|-------------|---------------------|
| Samburu          | 1955        | 0.28<br>(0.25–0.31) |
| Samburu          | 1956        | 0.28<br>(0.25–0.32) |
| Samburu          | 1957        | 0.29<br>(0.25–0.33) |
| Samburu          | 1958        | 0.29<br>(0.26–0.33) |
| Samburu          | 1959        | 0.3<br>(0.26–0.34)  |
| Samburu          | 1960        | 0.3<br>(0.27–0.35)  |
| Samburu          | 1961        | 0.31<br>(0.27–0.35) |
| Samburu          | 1962        | 0.32<br>(0.28–0.36) |
| Samburu          | 1963        | 0.33<br>(0.29–0.36) |
| Samburu          | 1964        | 0.34<br>(0.3–0.38)  |
| Samburu          | 1965        | 0.35<br>(0.31–0.4)  |
| Samburu          | 1966        | 0.37<br>(0.32–0.42) |
| Samburu          | 1967        | 0.39<br>(0.35–0.45) |
| Samburu          | 1968        | 0.42<br>(0.37–0.48) |
| Samburu          | 1969        | 0.44<br>(0.39–0.5)  |
| Samburu          | 1970        | 0.47<br>(0.42–0.53) |
| Samburu          | 1971        | 0.5<br>(0.45–0.55)  |
| Samburu          | 1972        | 0.53<br>(0.48–0.58) |
| Samburu          | 1973        | 0.55<br>(0.5–0.61)  |
| Samburu          | 1974        | 0.58<br>(0.52–0.64) |
| Samburu          | 1975        | 0.61<br>(0.55–0.67) |
| Samburu          | 1976        | 0.63<br>(0.56–0.71) |
| Samburu          | 1977        | 0.66<br>(0.58–0.74) |
| Samburu          | 1978        | 0.69<br>(0.59–0.78) |
| Samburu          | 1979        | 0.71<br>(0.61–0.81) |
| Samburu          | 1980        | 0.72<br>(0.62–0.84) |
| Samburu          | 1981        | 0.74<br>(0.64–0.85) |
| Samburu          | 1982        | 0.75<br>(0.66–0.86) |
| Samburu          | 1983        | 0.77<br>(0.68–0.87) |
| Samburu          | 1984        | 0.78<br>(0.7–0.88)  |
| Samburu          | 1985        | 0.79<br>(0.71–0.88) |

**Table 15 Ratio of adjusted to unadjusted 5q0 values for scaled locations by year**

| <b>Geography</b> | <b>Year</b> | <b>Ratio</b>        |
|------------------|-------------|---------------------|
| Samburu          | 1986        | 0.8<br>(0.73–0.88)  |
| Samburu          | 1987        | 0.81<br>(0.74–0.89) |
| Samburu          | 1988        | 0.83<br>(0.74–0.92) |
| Samburu          | 1989        | 0.84<br>(0.75–0.94) |
| Samburu          | 1990        | 0.86<br>(0.75–0.97) |
| Samburu          | 1991        | 0.88<br>(0.76–0.99) |
| Samburu          | 1992        | 0.9<br>(0.78–1.01)  |
| Samburu          | 1993        | 0.92<br>(0.82–1.02) |
| Samburu          | 1994        | 0.94<br>(0.84–1.03) |
| Samburu          | 1995        | 0.96<br>(0.87–1.05) |
| Samburu          | 1996        | 0.97<br>(0.88–1.06) |
| Samburu          | 1997        | 0.98<br>(0.88–1.09) |
| Samburu          | 1998        | 0.99<br>(0.87–1.11) |
| Samburu          | 1999        | 0.99<br>(0.86–1.13) |
| Samburu          | 2000        | 0.99<br>(0.85–1.13) |
| Samburu          | 2001        | 0.99<br>(0.86–1.14) |
| Samburu          | 2002        | 0.99<br>(0.86–1.13) |
| Samburu          | 2003        | 0.98<br>(0.86–1.12) |
| Samburu          | 2004        | 0.98<br>(0.86–1.1)  |
| Samburu          | 2005        | 0.98<br>(0.87–1.1)  |
| Samburu          | 2006        | 0.98<br>(0.87–1.1)  |
| Samburu          | 2007        | 0.97<br>(0.86–1.11) |
| Samburu          | 2008        | 0.98<br>(0.85–1.13) |
| Samburu          | 2009        | 0.99<br>(0.85–1.13) |
| Samburu          | 2010        | 0.99<br>(0.85–1.12) |
| Samburu          | 2011        | 0.98<br>(0.85–1.12) |
| Samburu          | 2012        | 0.98<br>(0.85–1.13) |
| Samburu          | 2013        | 0.99<br>(0.86–1.13) |
| Samburu          | 2014        | 1.0<br>(0.89–1.11)  |
| Samburu          | 2015        | 1.0<br>(0.91–1.09)  |
| Samburu          | 2016        | 1.01<br>(0.95–1.07) |

**Table 15 Ratio of adjusted to unadjusted 5q0 values for scaled locations by year**

| <b>Geography</b> | <b>Year</b> | <b>Ratio</b>        |
|------------------|-------------|---------------------|
| Samburu          | 2017        | 1.0<br>(0.99–1.02)  |
| Siaya            | 1950        | 0.76<br>(0.7–0.83)  |
| Siaya            | 1951        | 0.76<br>(0.69–0.83) |
| Siaya            | 1952        | 0.76<br>(0.69–0.84) |
| Siaya            | 1953        | 0.76<br>(0.68–0.84) |
| Siaya            | 1954        | 0.75<br>(0.67–0.83) |
| Siaya            | 1955        | 0.74<br>(0.66–0.83) |
| Siaya            | 1956        | 0.74<br>(0.66–0.83) |
| Siaya            | 1957        | 0.74<br>(0.66–0.83) |
| Siaya            | 1958        | 0.73<br>(0.66–0.82) |
| Siaya            | 1959        | 0.73<br>(0.66–0.81) |
| Siaya            | 1960        | 0.74<br>(0.66–0.81) |
| Siaya            | 1961        | 0.74<br>(0.67–0.81) |
| Siaya            | 1962        | 0.74<br>(0.67–0.82) |
| Siaya            | 1963        | 0.75<br>(0.67–0.83) |
| Siaya            | 1964        | 0.76<br>(0.68–0.84) |
| Siaya            | 1965        | 0.77<br>(0.69–0.84) |
| Siaya            | 1966        | 0.78<br>(0.7–0.86)  |
| Siaya            | 1967        | 0.79<br>(0.71–0.87) |
| Siaya            | 1968        | 0.8<br>(0.73–0.88)  |
| Siaya            | 1969        | 0.81<br>(0.74–0.89) |
| Siaya            | 1970        | 0.83<br>(0.75–0.91) |
| Siaya            | 1971        | 0.84<br>(0.76–0.92) |
| Siaya            | 1972        | 0.85<br>(0.78–0.94) |
| Siaya            | 1973        | 0.87<br>(0.79–0.95) |
| Siaya            | 1974        | 0.88<br>(0.8–0.96)  |
| Siaya            | 1975        | 0.89<br>(0.8–0.98)  |
| Siaya            | 1976        | 0.91<br>(0.81–1.0)  |
| Siaya            | 1977        | 0.91<br>(0.82–1.01) |
| Siaya            | 1978        | 0.92<br>(0.84–1.01) |
| Siaya            | 1979        | 0.93<br>(0.84–1.01) |

**Table 15 Ratio of adjusted to unadjusted 5q0 values for scaled locations by year**

| <b>Geography</b> | <b>Year</b> | <b>Ratio</b>        |
|------------------|-------------|---------------------|
| Siaya            | 1980        | 0.93<br>(0.85–1.01) |
| Siaya            | 1981        | 0.93<br>(0.86–1.01) |
| Siaya            | 1982        | 0.93<br>(0.85–1.02) |
| Siaya            | 1983        | 0.93<br>(0.85–1.01) |
| Siaya            | 1984        | 0.92<br>(0.85–1.0)  |
| Siaya            | 1985        | 0.92<br>(0.84–0.99) |
| Siaya            | 1986        | 0.91<br>(0.84–0.98) |
| Siaya            | 1987        | 0.91<br>(0.85–0.97) |
| Siaya            | 1988        | 0.91<br>(0.85–0.97) |
| Siaya            | 1989        | 0.91<br>(0.85–0.97) |
| Siaya            | 1990        | 0.91<br>(0.85–0.97) |
| Siaya            | 1991        | 0.92<br>(0.85–0.98) |
| Siaya            | 1992        | 0.92<br>(0.86–0.99) |
| Siaya            | 1993        | 0.94<br>(0.87–1.0)  |
| Siaya            | 1994        | 0.94<br>(0.87–1.02) |
| Siaya            | 1995        | 0.95<br>(0.88–1.03) |
| Siaya            | 1996        | 0.96<br>(0.88–1.05) |
| Siaya            | 1997        | 0.96<br>(0.88–1.05) |
| Siaya            | 1998        | 0.96<br>(0.88–1.05) |
| Siaya            | 1999        | 0.96<br>(0.89–1.03) |
| Siaya            | 2000        | 0.96<br>(0.89–1.03) |
| Siaya            | 2001        | 0.95<br>(0.87–1.03) |
| Siaya            | 2002        | 0.94<br>(0.86–1.03) |
| Siaya            | 2003        | 0.93<br>(0.85–1.02) |
| Siaya            | 2004        | 0.92<br>(0.84–1.01) |
| Siaya            | 2005        | 0.91<br>(0.84–1.01) |
| Siaya            | 2006        | 0.91<br>(0.83–0.99) |
| Siaya            | 2007        | 0.91<br>(0.83–0.97) |
| Siaya            | 2008        | 0.91<br>(0.83–0.99) |
| Siaya            | 2009        | 0.91<br>(0.82–1.01) |
| Siaya            | 2010        | 0.9<br>(0.8–1.02)   |

**Table 15 Ratio of adjusted to unadjusted 5q0 values for scaled locations by year**

| <b>Geography</b> | <b>Year</b> | <b>Ratio</b>        |
|------------------|-------------|---------------------|
| Siaya            | 2011        | 0.9<br>(0.79–1.02)  |
| Siaya            | 2012        | 0.9<br>(0.79–1.03)  |
| Siaya            | 2013        | 0.89<br>(0.78–1.02) |
| Siaya            | 2014        | 0.89<br>(0.78–1.01) |
| Siaya            | 2015        | 0.89<br>(0.78–1.01) |
| Siaya            | 2016        | 0.88<br>(0.77–1.0)  |
| Siaya            | 2017        | 0.88<br>(0.77–1.01) |
| TaitaTaveta      | 1950        | 0.94<br>(0.93–0.95) |
| TaitaTaveta      | 1951        | 0.94<br>(0.9–0.97)  |
| TaitaTaveta      | 1952        | 0.93<br>(0.87–0.99) |
| TaitaTaveta      | 1953        | 0.92<br>(0.86–0.98) |
| TaitaTaveta      | 1954        | 0.91<br>(0.85–0.97) |
| TaitaTaveta      | 1955        | 0.91<br>(0.84–0.98) |
| TaitaTaveta      | 1956        | 0.91<br>(0.83–1.0)  |
| TaitaTaveta      | 1957        | 0.91<br>(0.82–1.01) |
| TaitaTaveta      | 1958        | 0.91<br>(0.82–1.02) |
| TaitaTaveta      | 1959        | 0.92<br>(0.82–1.02) |
| TaitaTaveta      | 1960        | 0.92<br>(0.82–1.03) |
| TaitaTaveta      | 1961        | 0.92<br>(0.82–1.03) |
| TaitaTaveta      | 1962        | 0.93<br>(0.82–1.04) |
| TaitaTaveta      | 1963        | 0.94<br>(0.83–1.06) |
| TaitaTaveta      | 1964        | 0.95<br>(0.84–1.07) |
| TaitaTaveta      | 1965        | 0.96<br>(0.84–1.08) |
| TaitaTaveta      | 1966        | 0.97<br>(0.86–1.1)  |
| TaitaTaveta      | 1967        | 0.98<br>(0.86–1.11) |
| TaitaTaveta      | 1968        | 0.98<br>(0.88–1.11) |
| TaitaTaveta      | 1969        | 0.99<br>(0.89–1.11) |
| TaitaTaveta      | 1970        | 1.0<br>(0.9–1.11)   |
| TaitaTaveta      | 1971        | 1.01<br>(0.9–1.12)  |
| TaitaTaveta      | 1972        | 1.01<br>(0.9–1.12)  |
| TaitaTaveta      | 1973        | 1.0<br>(0.9–1.11)   |

**Table 15 Ratio of adjusted to unadjusted 5q0 values for scaled locations by year**

| <b>Geography</b> | <b>Year</b> | <b>Ratio</b>        |
|------------------|-------------|---------------------|
| TaitaTaveta      | 1974        | 0.99<br>(0.9–1.09)  |
| TaitaTaveta      | 1975        | 0.99<br>(0.89–1.09) |
| TaitaTaveta      | 1976        | 0.99<br>(0.88–1.09) |
| TaitaTaveta      | 1977        | 0.99<br>(0.88–1.09) |
| TaitaTaveta      | 1978        | 0.99<br>(0.89–1.09) |
| TaitaTaveta      | 1979        | 0.99<br>(0.89–1.09) |
| TaitaTaveta      | 1980        | 0.99<br>(0.89–1.11) |
| TaitaTaveta      | 1981        | 0.99<br>(0.88–1.11) |
| TaitaTaveta      | 1982        | 0.99<br>(0.88–1.11) |
| TaitaTaveta      | 1983        | 1.0<br>(0.88–1.12)  |
| TaitaTaveta      | 1984        | 1.0<br>(0.89–1.12)  |
| TaitaTaveta      | 1985        | 1.0<br>(0.9–1.12)   |
| TaitaTaveta      | 1986        | 1.01<br>(0.9–1.13)  |
| TaitaTaveta      | 1987        | 1.02<br>(0.91–1.15) |
| TaitaTaveta      | 1988        | 1.02<br>(0.91–1.16) |
| TaitaTaveta      | 1989        | 1.03<br>(0.91–1.16) |
| TaitaTaveta      | 1990        | 1.03<br>(0.91–1.17) |
| TaitaTaveta      | 1991        | 1.04<br>(0.92–1.18) |
| TaitaTaveta      | 1992        | 1.05<br>(0.93–1.19) |
| TaitaTaveta      | 1993        | 1.06<br>(0.95–1.19) |
| TaitaTaveta      | 1994        | 1.06<br>(0.95–1.2)  |
| TaitaTaveta      | 1995        | 1.07<br>(0.96–1.19) |
| TaitaTaveta      | 1996        | 1.07<br>(0.97–1.18) |
| TaitaTaveta      | 1997        | 1.07<br>(0.97–1.17) |
| TaitaTaveta      | 1998        | 1.07<br>(0.98–1.16) |
| TaitaTaveta      | 1999        | 1.06<br>(0.98–1.15) |
| TaitaTaveta      | 2000        | 1.06<br>(0.97–1.15) |
| TaitaTaveta      | 2001        | 1.06<br>(0.96–1.17) |
| TaitaTaveta      | 2002        | 1.05<br>(0.94–1.17) |
| TaitaTaveta      | 2003        | 1.03<br>(0.92–1.16) |
| TaitaTaveta      | 2004        | 1.02<br>(0.91–1.14) |

**Table 15 Ratio of adjusted to unadjusted 5q0 values for scaled locations by year**

| <b>Geography</b> | <b>Year</b> | <b>Ratio</b>        |
|------------------|-------------|---------------------|
| TaitaTaveta      | 2005        | 1.0<br>(0.88–1.14)  |
| TaitaTaveta      | 2006        | 0.99<br>(0.87–1.13) |
| TaitaTaveta      | 2007        | 0.99<br>(0.87–1.13) |
| TaitaTaveta      | 2008        | 1.0<br>(0.86–1.13)  |
| TaitaTaveta      | 2009        | 1.01<br>(0.86–1.17) |
| TaitaTaveta      | 2010        | 1.01<br>(0.87–1.18) |
| TaitaTaveta      | 2011        | 1.01<br>(0.86–1.17) |
| TaitaTaveta      | 2012        | 1.01<br>(0.87–1.16) |
| TaitaTaveta      | 2013        | 1.0<br>(0.87–1.14)  |
| TaitaTaveta      | 2014        | 1.0<br>(0.88–1.11)  |
| TaitaTaveta      | 2015        | 1.0<br>(0.91–1.09)  |
| TaitaTaveta      | 2016        | 1.0<br>(0.94–1.05)  |
| TaitaTaveta      | 2017        | 0.99<br>(0.98–1.0)  |
| TanaRiver        | 1950        | 0.93<br>(0.92–0.94) |
| TanaRiver        | 1951        | 0.93<br>(0.89–0.97) |
| TanaRiver        | 1952        | 0.92<br>(0.86–0.98) |
| TanaRiver        | 1953        | 0.91<br>(0.84–0.98) |
| TanaRiver        | 1954        | 0.9<br>(0.83–0.97)  |
| TanaRiver        | 1955        | 0.9<br>(0.82–0.98)  |
| TanaRiver        | 1956        | 0.9<br>(0.81–1.0)   |
| TanaRiver        | 1957        | 0.91<br>(0.81–1.01) |
| TanaRiver        | 1958        | 0.91<br>(0.81–1.02) |
| TanaRiver        | 1959        | 0.91<br>(0.8–1.02)  |
| TanaRiver        | 1960        | 0.91<br>(0.81–1.03) |
| TanaRiver        | 1961        | 0.92<br>(0.81–1.03) |
| TanaRiver        | 1962        | 0.92<br>(0.81–1.05) |
| TanaRiver        | 1963        | 0.93<br>(0.82–1.07) |
| TanaRiver        | 1964        | 0.95<br>(0.83–1.08) |
| TanaRiver        | 1965        | 0.95<br>(0.83–1.08) |
| TanaRiver        | 1966        | 0.96<br>(0.85–1.1)  |
| TanaRiver        | 1967        | 0.98<br>(0.86–1.12) |



**Table 15 Ratio of adjusted to unadjusted 5q0 values for scaled locations by year**

| <b>Geography</b> | <b>Year</b> | <b>Ratio</b>        |
|------------------|-------------|---------------------|
| TanaRiver        | 1968        | 0.98<br>(0.87–1.11) |
| TanaRiver        | 1969        | 0.99<br>(0.88–1.12) |
| TanaRiver        | 1970        | 1.0<br>(0.89–1.12)  |
| TanaRiver        | 1971        | 1.01<br>(0.9–1.13)  |
| TanaRiver        | 1972        | 1.01<br>(0.89–1.13) |
| TanaRiver        | 1973        | 1.0<br>(0.89–1.11)  |
| TanaRiver        | 1974        | 0.99<br>(0.89–1.1)  |
| TanaRiver        | 1975        | 0.99<br>(0.89–1.09) |
| TanaRiver        | 1976        | 0.99<br>(0.88–1.1)  |
| TanaRiver        | 1977        | 0.99<br>(0.88–1.09) |
| TanaRiver        | 1978        | 0.99<br>(0.89–1.09) |
| TanaRiver        | 1979        | 0.99<br>(0.89–1.09) |
| TanaRiver        | 1980        | 0.99<br>(0.88–1.11) |
| TanaRiver        | 1981        | 0.99<br>(0.88–1.11) |
| TanaRiver        | 1982        | 0.99<br>(0.88–1.11) |
| TanaRiver        | 1983        | 1.0<br>(0.88–1.12)  |
| TanaRiver        | 1984        | 1.0<br>(0.89–1.13)  |
| TanaRiver        | 1985        | 1.0<br>(0.9–1.12)   |
| TanaRiver        | 1986        | 1.01<br>(0.9–1.13)  |
| TanaRiver        | 1987        | 1.02<br>(0.9–1.15)  |
| TanaRiver        | 1988        | 1.02<br>(0.91–1.16) |
| TanaRiver        | 1989        | 1.03<br>(0.91–1.16) |
| TanaRiver        | 1990        | 1.03<br>(0.91–1.17) |
| TanaRiver        | 1991        | 1.04<br>(0.92–1.18) |
| TanaRiver        | 1992        | 1.05<br>(0.93–1.19) |
| TanaRiver        | 1993        | 1.06<br>(0.95–1.19) |
| TanaRiver        | 1994        | 1.06<br>(0.95–1.2)  |
| TanaRiver        | 1995        | 1.07<br>(0.96–1.19) |
| TanaRiver        | 1996        | 1.07<br>(0.97–1.18) |
| TanaRiver        | 1997        | 1.07<br>(0.97–1.17) |
| TanaRiver        | 1998        | 1.07<br>(0.98–1.16) |

**Table 15 Ratio of adjusted to unadjusted 5q0 values for scaled locations by year**

| <b>Geography</b> | <b>Year</b> | <b>Ratio</b>        |
|------------------|-------------|---------------------|
| TanaRiver        | 1999        | 1.06<br>(0.98–1.15) |
| TanaRiver        | 2000        | 1.06<br>(0.97–1.15) |
| TanaRiver        | 2001        | 1.06<br>(0.96–1.17) |
| TanaRiver        | 2002        | 1.05<br>(0.94–1.16) |
| TanaRiver        | 2003        | 1.03<br>(0.92–1.16) |
| TanaRiver        | 2004        | 1.02<br>(0.91–1.14) |
| TanaRiver        | 2005        | 1.0<br>(0.88–1.14)  |
| TanaRiver        | 2006        | 0.99<br>(0.87–1.12) |
| TanaRiver        | 2007        | 0.99<br>(0.87–1.13) |
| TanaRiver        | 2008        | 1.0<br>(0.87–1.13)  |
| TanaRiver        | 2009        | 1.01<br>(0.86–1.17) |
| TanaRiver        | 2010        | 1.01<br>(0.87–1.18) |
| TanaRiver        | 2011        | 1.01<br>(0.86–1.17) |
| TanaRiver        | 2012        | 1.01<br>(0.87–1.16) |
| TanaRiver        | 2013        | 1.0<br>(0.87–1.14)  |
| TanaRiver        | 2014        | 0.99<br>(0.89–1.1)  |
| TanaRiver        | 2015        | 1.0<br>(0.91–1.09)  |
| TanaRiver        | 2016        | 1.0<br>(0.94–1.05)  |
| TanaRiver        | 2017        | 0.99<br>(0.98–1.0)  |
| TharakaNithi     | 1950        | 0.55<br>(0.55–0.55) |
| TharakaNithi     | 1951        | 0.56<br>(0.53–0.59) |
| TharakaNithi     | 1952        | 0.57<br>(0.53–0.61) |
| TharakaNithi     | 1953        | 0.58<br>(0.53–0.63) |
| TharakaNithi     | 1954        | 0.58<br>(0.53–0.64) |
| TharakaNithi     | 1955        | 0.6<br>(0.53–0.66)  |
| TharakaNithi     | 1956        | 0.6<br>(0.53–0.67)  |
| TharakaNithi     | 1957        | 0.61<br>(0.53–0.69) |
| TharakaNithi     | 1958        | 0.61<br>(0.53–0.69) |
| TharakaNithi     | 1959        | 0.61<br>(0.54–0.69) |
| TharakaNithi     | 1960        | 0.62<br>(0.54–0.7)  |
| TharakaNithi     | 1961        | 0.62<br>(0.55–0.7)  |

**Table 15 Ratio of adjusted to unadjusted 5q0 values for scaled locations by year**

| <b>Geography</b> | <b>Year</b> | <b>Ratio</b>        |
|------------------|-------------|---------------------|
| TharakaNithi     | 1962        | 0.63<br>(0.56–0.71) |
| TharakaNithi     | 1963        | 0.64<br>(0.57–0.72) |
| TharakaNithi     | 1964        | 0.65<br>(0.58–0.73) |
| TharakaNithi     | 1965        | 0.66<br>(0.59–0.74) |
| TharakaNithi     | 1966        | 0.68<br>(0.61–0.76) |
| TharakaNithi     | 1967        | 0.7<br>(0.63–0.77)  |
| TharakaNithi     | 1968        | 0.71<br>(0.64–0.8)  |
| TharakaNithi     | 1969        | 0.73<br>(0.65–0.81) |
| TharakaNithi     | 1970        | 0.74<br>(0.67–0.82) |
| TharakaNithi     | 1971        | 0.76<br>(0.69–0.83) |
| TharakaNithi     | 1972        | 0.77<br>(0.71–0.84) |
| TharakaNithi     | 1973        | 0.78<br>(0.72–0.86) |
| TharakaNithi     | 1974        | 0.79<br>(0.72–0.88) |
| TharakaNithi     | 1975        | 0.8<br>(0.73–0.88)  |
| TharakaNithi     | 1976        | 0.81<br>(0.74–0.89) |
| TharakaNithi     | 1977        | 0.82<br>(0.74–0.9)  |
| TharakaNithi     | 1978        | 0.83<br>(0.75–0.91) |
| TharakaNithi     | 1979        | 0.84<br>(0.77–0.93) |
| TharakaNithi     | 1980        | 0.85<br>(0.77–0.94) |
| TharakaNithi     | 1981        | 0.86<br>(0.78–0.95) |
| TharakaNithi     | 1982        | 0.87<br>(0.79–0.96) |
| TharakaNithi     | 1983        | 0.88<br>(0.79–0.98) |
| TharakaNithi     | 1984        | 0.89<br>(0.79–0.99) |
| TharakaNithi     | 1985        | 0.89<br>(0.79–1.0)  |
| TharakaNithi     | 1986        | 0.9<br>(0.8–1.0)    |
| TharakaNithi     | 1987        | 0.9<br>(0.81–1.0)   |
| TharakaNithi     | 1988        | 0.91<br>(0.83–1.0)  |
| TharakaNithi     | 1989        | 0.91<br>(0.84–1.0)  |
| TharakaNithi     | 1990        | 0.92<br>(0.85–1.0)  |
| TharakaNithi     | 1991        | 0.93<br>(0.85–1.01) |
| TharakaNithi     | 1992        | 0.94<br>(0.85–1.03) |

**Table 15 Ratio of adjusted to unadjusted 5q0 values for scaled locations by year**

| <b>Geography</b> | <b>Year</b> | <b>Ratio</b>        |
|------------------|-------------|---------------------|
| TharakaNithi     | 1993        | 0.95<br>(0.85–1.05) |
| TharakaNithi     | 1994        | 0.95<br>(0.85–1.05) |
| TharakaNithi     | 1995        | 0.95<br>(0.85–1.05) |
| TharakaNithi     | 1996        | 0.95<br>(0.85–1.04) |
| TharakaNithi     | 1997        | 0.95<br>(0.87–1.04) |
| TharakaNithi     | 1998        | 0.95<br>(0.87–1.03) |
| TharakaNithi     | 1999        | 0.95<br>(0.87–1.03) |
| TharakaNithi     | 2000        | 0.94<br>(0.86–1.03) |
| TharakaNithi     | 2001        | 0.94<br>(0.85–1.04) |
| TharakaNithi     | 2002        | 0.94<br>(0.84–1.04) |
| TharakaNithi     | 2003        | 0.94<br>(0.83–1.05) |
| TharakaNithi     | 2004        | 0.93<br>(0.83–1.04) |
| TharakaNithi     | 2005        | 0.92<br>(0.83–1.03) |
| TharakaNithi     | 2006        | 0.92<br>(0.83–1.01) |
| TharakaNithi     | 2007        | 0.92<br>(0.84–1.01) |
| TharakaNithi     | 2008        | 0.94<br>(0.85–1.04) |
| TharakaNithi     | 2009        | 0.95<br>(0.84–1.07) |
| TharakaNithi     | 2010        | 0.96<br>(0.84–1.09) |
| TharakaNithi     | 2011        | 0.96<br>(0.84–1.1)  |
| TharakaNithi     | 2012        | 0.97<br>(0.84–1.12) |
| TharakaNithi     | 2013        | 0.99<br>(0.86–1.13) |
| TharakaNithi     | 2014        | 1.0<br>(0.88–1.13)  |
| TharakaNithi     | 2015        | 1.0<br>(0.91–1.1)   |
| TharakaNithi     | 2016        | 1.0<br>(0.94–1.06)  |
| TharakaNithi     | 2017        | 1.0<br>(0.96–1.03)  |
| TransNzoia       | 1950        | 0.26<br>(0.26–0.26) |
| TransNzoia       | 1951        | 0.26<br>(0.25–0.28) |
| TransNzoia       | 1952        | 0.27<br>(0.25–0.29) |
| TransNzoia       | 1953        | 0.27<br>(0.25–0.3)  |
| TransNzoia       | 1954        | 0.28<br>(0.25–0.3)  |
| TransNzoia       | 1955        | 0.28<br>(0.26–0.31) |

**Table 15 Ratio of adjusted to unadjusted 5q0 values for scaled locations by year**

| <b>Geography</b> | <b>Year</b> | <b>Ratio</b>        |
|------------------|-------------|---------------------|
| TransNzoia       | 1956        | 0.29<br>(0.26–0.32) |
| TransNzoia       | 1957        | 0.29<br>(0.26–0.33) |
| TransNzoia       | 1958        | 0.3<br>(0.26–0.34)  |
| TransNzoia       | 1959        | 0.3<br>(0.27–0.35)  |
| TransNzoia       | 1960        | 0.31<br>(0.27–0.35) |
| TransNzoia       | 1961        | 0.32<br>(0.28–0.36) |
| TransNzoia       | 1962        | 0.32<br>(0.29–0.36) |
| TransNzoia       | 1963        | 0.33<br>(0.3–0.37)  |
| TransNzoia       | 1964        | 0.34<br>(0.31–0.38) |
| TransNzoia       | 1965        | 0.36<br>(0.32–0.4)  |
| TransNzoia       | 1966        | 0.38<br>(0.33–0.42) |
| TransNzoia       | 1967        | 0.4<br>(0.35–0.45)  |
| TransNzoia       | 1968        | 0.42<br>(0.37–0.48) |
| TransNzoia       | 1969        | 0.45<br>(0.39–0.5)  |
| TransNzoia       | 1970        | 0.47<br>(0.42–0.53) |
| TransNzoia       | 1971        | 0.5<br>(0.45–0.55)  |
| TransNzoia       | 1972        | 0.53<br>(0.48–0.58) |
| TransNzoia       | 1973        | 0.55<br>(0.5–0.61)  |
| TransNzoia       | 1974        | 0.58<br>(0.52–0.64) |
| TransNzoia       | 1975        | 0.61<br>(0.55–0.67) |
| TransNzoia       | 1976        | 0.63<br>(0.56–0.71) |
| TransNzoia       | 1977        | 0.66<br>(0.58–0.74) |
| TransNzoia       | 1978        | 0.68<br>(0.59–0.78) |
| TransNzoia       | 1979        | 0.71<br>(0.61–0.81) |
| TransNzoia       | 1980        | 0.72<br>(0.62–0.83) |
| TransNzoia       | 1981        | 0.74<br>(0.64–0.85) |
| TransNzoia       | 1982        | 0.75<br>(0.66–0.86) |
| TransNzoia       | 1983        | 0.77<br>(0.67–0.87) |
| TransNzoia       | 1984        | 0.78<br>(0.69–0.88) |
| TransNzoia       | 1985        | 0.79<br>(0.71–0.88) |
| TransNzoia       | 1986        | 0.8<br>(0.73–0.88)  |

**Table 15 Ratio of adjusted to unadjusted 5q0 values for scaled locations by year**

| <b>Geography</b> | <b>Year</b> | <b>Ratio</b>        |
|------------------|-------------|---------------------|
| TransNzoia       | 1987        | 0.81<br>(0.73–0.89) |
| TransNzoia       | 1988        | 0.82<br>(0.74–0.91) |
| TransNzoia       | 1989        | 0.84<br>(0.74–0.94) |
| TransNzoia       | 1990        | 0.86<br>(0.75–0.97) |
| TransNzoia       | 1991        | 0.87<br>(0.76–0.99) |
| TransNzoia       | 1992        | 0.9<br>(0.78–1.01)  |
| TransNzoia       | 1993        | 0.92<br>(0.81–1.02) |
| TransNzoia       | 1994        | 0.94<br>(0.84–1.03) |
| TransNzoia       | 1995        | 0.96<br>(0.87–1.05) |
| TransNzoia       | 1996        | 0.97<br>(0.88–1.06) |
| TransNzoia       | 1997        | 0.98<br>(0.88–1.09) |
| TransNzoia       | 1998        | 0.99<br>(0.87–1.11) |
| TransNzoia       | 1999        | 0.99<br>(0.86–1.13) |
| TransNzoia       | 2000        | 0.99<br>(0.85–1.13) |
| TransNzoia       | 2001        | 0.99<br>(0.86–1.14) |
| TransNzoia       | 2002        | 0.99<br>(0.85–1.13) |
| TransNzoia       | 2003        | 0.98<br>(0.86–1.12) |
| TransNzoia       | 2004        | 0.98<br>(0.86–1.1)  |
| TransNzoia       | 2005        | 0.98<br>(0.87–1.1)  |
| TransNzoia       | 2006        | 0.98<br>(0.87–1.1)  |
| TransNzoia       | 2007        | 0.97<br>(0.86–1.11) |
| TransNzoia       | 2008        | 0.98<br>(0.85–1.13) |
| TransNzoia       | 2009        | 0.99<br>(0.85–1.13) |
| TransNzoia       | 2010        | 0.99<br>(0.85–1.12) |
| TransNzoia       | 2011        | 0.98<br>(0.85–1.12) |
| TransNzoia       | 2012        | 0.98<br>(0.85–1.13) |
| TransNzoia       | 2013        | 0.99<br>(0.86–1.13) |
| TransNzoia       | 2014        | 1.0<br>(0.89–1.11)  |
| TransNzoia       | 2015        | 1.0<br>(0.91–1.09)  |
| TransNzoia       | 2016        | 1.01<br>(0.95–1.07) |
| TransNzoia       | 2017        | 1.0<br>(0.99–1.02)  |

**Table 15 Ratio of adjusted to unadjusted 5q0 values for scaled locations by year**

| <b>Geography</b> | <b>Year</b> | <b>Ratio</b>        |
|------------------|-------------|---------------------|
| Turkana          | 1950        | 0.29<br>(0.28–0.3)  |
| Turkana          | 1951        | 0.3<br>(0.28–0.31)  |
| Turkana          | 1952        | 0.3<br>(0.28–0.32)  |
| Turkana          | 1953        | 0.3<br>(0.28–0.33)  |
| Turkana          | 1954        | 0.31<br>(0.28–0.34) |
| Turkana          | 1955        | 0.31<br>(0.28–0.34) |
| Turkana          | 1956        | 0.32<br>(0.28–0.35) |
| Turkana          | 1957        | 0.32<br>(0.28–0.36) |
| Turkana          | 1958        | 0.32<br>(0.29–0.37) |
| Turkana          | 1959        | 0.33<br>(0.29–0.37) |
| Turkana          | 1960        | 0.33<br>(0.3–0.38)  |
| Turkana          | 1961        | 0.34<br>(0.3–0.38)  |
| Turkana          | 1962        | 0.35<br>(0.31–0.39) |
| Turkana          | 1963        | 0.36<br>(0.32–0.39) |
| Turkana          | 1964        | 0.37<br>(0.33–0.4)  |
| Turkana          | 1965        | 0.38<br>(0.34–0.43) |
| Turkana          | 1966        | 0.4<br>(0.35–0.45)  |
| Turkana          | 1967        | 0.42<br>(0.37–0.48) |
| Turkana          | 1968        | 0.45<br>(0.39–0.5)  |
| Turkana          | 1969        | 0.47<br>(0.42–0.53) |
| Turkana          | 1970        | 0.5<br>(0.44–0.55)  |
| Turkana          | 1971        | 0.52<br>(0.47–0.57) |
| Turkana          | 1972        | 0.55<br>(0.5–0.6)   |
| Turkana          | 1973        | 0.58<br>(0.53–0.63) |
| Turkana          | 1974        | 0.6<br>(0.54–0.66)  |
| Turkana          | 1975        | 0.63<br>(0.57–0.69) |
| Turkana          | 1976        | 0.65<br>(0.59–0.72) |
| Turkana          | 1977        | 0.68<br>(0.6–0.75)  |
| Turkana          | 1978        | 0.7<br>(0.61–0.79)  |
| Turkana          | 1979        | 0.72<br>(0.63–0.82) |
| Turkana          | 1980        | 0.74<br>(0.64–0.84) |

**Table 15 Ratio of adjusted to unadjusted 5q0 values for scaled locations by year**

| <b>Geography</b> | <b>Year</b> | <b>Ratio</b>        |
|------------------|-------------|---------------------|
| Turkana          | 1981        | 0.75<br>(0.65–0.86) |
| Turkana          | 1982        | 0.77<br>(0.67–0.87) |
| Turkana          | 1983        | 0.78<br>(0.69–0.88) |
| Turkana          | 1984        | 0.79<br>(0.71–0.88) |
| Turkana          | 1985        | 0.8<br>(0.72–0.89)  |
| Turkana          | 1986        | 0.81<br>(0.74–0.88) |
| Turkana          | 1987        | 0.82<br>(0.75–0.9)  |
| Turkana          | 1988        | 0.83<br>(0.75–0.92) |
| Turkana          | 1989        | 0.85<br>(0.76–0.94) |
| Turkana          | 1990        | 0.86<br>(0.76–0.97) |
| Turkana          | 1991        | 0.88<br>(0.77–0.99) |
| Turkana          | 1992        | 0.9<br>(0.79–1.01)  |
| Turkana          | 1993        | 0.92<br>(0.82–1.02) |
| Turkana          | 1994        | 0.94<br>(0.85–1.03) |
| Turkana          | 1995        | 0.96<br>(0.87–1.05) |
| Turkana          | 1996        | 0.97<br>(0.88–1.06) |
| Turkana          | 1997        | 0.98<br>(0.89–1.09) |
| Turkana          | 1998        | 0.99<br>(0.88–1.1)  |
| Turkana          | 1999        | 0.99<br>(0.86–1.12) |
| Turkana          | 2000        | 0.99<br>(0.85–1.13) |
| Turkana          | 2001        | 0.99<br>(0.86–1.14) |
| Turkana          | 2002        | 0.99<br>(0.86–1.12) |
| Turkana          | 2003        | 0.98<br>(0.86–1.12) |
| Turkana          | 2004        | 0.98<br>(0.86–1.1)  |
| Turkana          | 2005        | 0.98<br>(0.87–1.1)  |
| Turkana          | 2006        | 0.98<br>(0.87–1.09) |
| Turkana          | 2007        | 0.97<br>(0.86–1.11) |
| Turkana          | 2008        | 0.98<br>(0.85–1.12) |
| Turkana          | 2009        | 0.99<br>(0.86–1.13) |
| Turkana          | 2010        | 0.99<br>(0.85–1.12) |
| Turkana          | 2011        | 0.98<br>(0.85–1.12) |



**Table 15 Ratio of adjusted to unadjusted 5q0 values for scaled locations by year**

| <b>Geography</b> | <b>Year</b> | <b>Ratio</b>        |
|------------------|-------------|---------------------|
| Turkana          | 2012        | 0.98<br>(0.85–1.12) |
| Turkana          | 2013        | 0.99<br>(0.86–1.13) |
| Turkana          | 2014        | 1.0<br>(0.89–1.11)  |
| Turkana          | 2015        | 1.0<br>(0.92–1.09)  |
| Turkana          | 2016        | 1.01<br>(0.95–1.07) |
| Turkana          | 2017        | 1.0<br>(0.99–1.02)  |
| UasinGishu       | 1950        | 0.25<br>(0.24–0.25) |
| UasinGishu       | 1951        | 0.25<br>(0.24–0.27) |
| UasinGishu       | 1952        | 0.26<br>(0.24–0.28) |
| UasinGishu       | 1953        | 0.26<br>(0.24–0.28) |
| UasinGishu       | 1954        | 0.26<br>(0.24–0.29) |
| UasinGishu       | 1955        | 0.27<br>(0.25–0.3)  |
| UasinGishu       | 1956        | 0.28<br>(0.25–0.31) |
| UasinGishu       | 1957        | 0.28<br>(0.25–0.32) |
| UasinGishu       | 1958        | 0.29<br>(0.25–0.33) |
| UasinGishu       | 1959        | 0.29<br>(0.26–0.33) |
| UasinGishu       | 1960        | 0.3<br>(0.26–0.34)  |
| UasinGishu       | 1961        | 0.3<br>(0.27–0.35)  |
| UasinGishu       | 1962        | 0.31<br>(0.28–0.35) |
| UasinGishu       | 1963        | 0.32<br>(0.29–0.36) |
| UasinGishu       | 1964        | 0.33<br>(0.29–0.37) |
| UasinGishu       | 1965        | 0.35<br>(0.3–0.39)  |
| UasinGishu       | 1966        | 0.36<br>(0.32–0.41) |
| UasinGishu       | 1967        | 0.39<br>(0.34–0.44) |
| UasinGishu       | 1968        | 0.41<br>(0.36–0.47) |
| UasinGishu       | 1969        | 0.44<br>(0.38–0.49) |
| UasinGishu       | 1970        | 0.46<br>(0.41–0.52) |
| UasinGishu       | 1971        | 0.49<br>(0.44–0.54) |
| UasinGishu       | 1972        | 0.52<br>(0.47–0.57) |
| UasinGishu       | 1973        | 0.55<br>(0.49–0.6)  |
| UasinGishu       | 1974        | 0.57<br>(0.51–0.63) |

**Table 15 Ratio of adjusted to unadjusted 5q0 values for scaled locations by year**

| <b>Geography</b> | <b>Year</b> | <b>Ratio</b>        |
|------------------|-------------|---------------------|
| UasinGishu       | 1975        | 0.6<br>(0.54–0.66)  |
| UasinGishu       | 1976        | 0.62<br>(0.56–0.7)  |
| UasinGishu       | 1977        | 0.65<br>(0.57–0.73) |
| UasinGishu       | 1978        | 0.68<br>(0.59–0.77) |
| UasinGishu       | 1979        | 0.7<br>(0.6–0.81)   |
| UasinGishu       | 1980        | 0.72<br>(0.61–0.83) |
| UasinGishu       | 1981        | 0.73<br>(0.63–0.85) |
| UasinGishu       | 1982        | 0.75<br>(0.65–0.86) |
| UasinGishu       | 1983        | 0.76<br>(0.67–0.87) |
| UasinGishu       | 1984        | 0.78<br>(0.69–0.87) |
| UasinGishu       | 1985        | 0.79<br>(0.71–0.88) |
| UasinGishu       | 1986        | 0.8<br>(0.73–0.87)  |
| UasinGishu       | 1987        | 0.81<br>(0.73–0.89) |
| UasinGishu       | 1988        | 0.82<br>(0.74–0.91) |
| UasinGishu       | 1989        | 0.84<br>(0.74–0.94) |
| UasinGishu       | 1990        | 0.86<br>(0.75–0.97) |
| UasinGishu       | 1991        | 0.87<br>(0.76–0.99) |
| UasinGishu       | 1992        | 0.9<br>(0.78–1.01)  |
| UasinGishu       | 1993        | 0.92<br>(0.81–1.02) |
| UasinGishu       | 1994        | 0.94<br>(0.84–1.03) |
| UasinGishu       | 1995        | 0.96<br>(0.87–1.06) |
| UasinGishu       | 1996        | 0.97<br>(0.88–1.07) |
| UasinGishu       | 1997        | 0.98<br>(0.88–1.09) |
| UasinGishu       | 1998        | 0.99<br>(0.87–1.11) |
| UasinGishu       | 1999        | 0.99<br>(0.86–1.13) |
| UasinGishu       | 2000        | 0.99<br>(0.85–1.13) |
| UasinGishu       | 2001        | 0.99<br>(0.86–1.15) |
| UasinGishu       | 2002        | 0.99<br>(0.85–1.13) |
| UasinGishu       | 2003        | 0.98<br>(0.86–1.12) |
| UasinGishu       | 2004        | 0.98<br>(0.86–1.1)  |
| UasinGishu       | 2005        | 0.98<br>(0.87–1.1)  |

**Table 15 Ratio of adjusted to unadjusted 5q0 values for scaled locations by year**

| <b>Geography</b> | <b>Year</b> | <b>Ratio</b>        |
|------------------|-------------|---------------------|
| UasinGishu       | 2006        | 0.98<br>(0.87–1.1)  |
| UasinGishu       | 2007        | 0.97<br>(0.86–1.11) |
| UasinGishu       | 2008        | 0.98<br>(0.85–1.13) |
| UasinGishu       | 2009        | 0.99<br>(0.85–1.13) |
| UasinGishu       | 2010        | 0.99<br>(0.85–1.12) |
| UasinGishu       | 2011        | 0.98<br>(0.85–1.12) |
| UasinGishu       | 2012        | 0.98<br>(0.85–1.13) |
| UasinGishu       | 2013        | 0.99<br>(0.86–1.13) |
| UasinGishu       | 2014        | 1.0<br>(0.89–1.11)  |
| UasinGishu       | 2015        | 1.0<br>(0.91–1.09)  |
| UasinGishu       | 2016        | 1.01<br>(0.95–1.07) |
| UasinGishu       | 2017        | 1.0<br>(0.99–1.02)  |
| Vihiga           | 1950        | 0.78<br>(0.77–0.79) |
| Vihiga           | 1951        | 0.8<br>(0.76–0.84)  |
| Vihiga           | 1952        | 0.8<br>(0.75–0.87)  |
| Vihiga           | 1953        | 0.8<br>(0.74–0.88)  |
| Vihiga           | 1954        | 0.8<br>(0.72–0.9)   |
| Vihiga           | 1955        | 0.8<br>(0.71–0.91)  |
| Vihiga           | 1956        | 0.8<br>(0.7–0.92)   |
| Vihiga           | 1957        | 0.8<br>(0.69–0.92)  |
| Vihiga           | 1958        | 0.8<br>(0.69–0.91)  |
| Vihiga           | 1959        | 0.8<br>(0.69–0.9)   |
| Vihiga           | 1960        | 0.79<br>(0.69–0.91) |
| Vihiga           | 1961        | 0.79<br>(0.7–0.9)   |
| Vihiga           | 1962        | 0.8<br>(0.7–0.89)   |
| Vihiga           | 1963        | 0.8<br>(0.71–0.9)   |
| Vihiga           | 1964        | 0.81<br>(0.71–0.91) |
| Vihiga           | 1965        | 0.82<br>(0.73–0.91) |
| Vihiga           | 1966        | 0.83<br>(0.74–0.92) |
| Vihiga           | 1967        | 0.84<br>(0.76–0.93) |
| Vihiga           | 1968        | 0.86<br>(0.77–0.95) |

**Table 15 Ratio of adjusted to unadjusted 5q0 values for scaled locations by year**

| <b>Geography</b> | <b>Year</b> | <b>Ratio</b>        |
|------------------|-------------|---------------------|
| Vihiga           | 1969        | 0.87<br>(0.78–0.96) |
| Vihiga           | 1970        | 0.88<br>(0.81–0.97) |
| Vihiga           | 1971        | 0.9<br>(0.82–0.99)  |
| Vihiga           | 1972        | 0.92<br>(0.83–1.01) |
| Vihiga           | 1973        | 0.93<br>(0.84–1.03) |
| Vihiga           | 1974        | 0.95<br>(0.84–1.05) |
| Vihiga           | 1975        | 0.96<br>(0.84–1.08) |
| Vihiga           | 1976        | 0.97<br>(0.83–1.12) |
| Vihiga           | 1977        | 0.98<br>(0.83–1.14) |
| Vihiga           | 1978        | 0.98<br>(0.83–1.15) |
| Vihiga           | 1979        | 0.99<br>(0.83–1.15) |
| Vihiga           | 1980        | 0.99<br>(0.84–1.15) |
| Vihiga           | 1981        | 1.0<br>(0.85–1.16)  |
| Vihiga           | 1982        | 1.0<br>(0.87–1.14)  |
| Vihiga           | 1983        | 1.0<br>(0.89–1.12)  |
| Vihiga           | 1984        | 1.0<br>(0.91–1.1)   |
| Vihiga           | 1985        | 1.0<br>(0.92–1.09)  |
| Vihiga           | 1986        | 1.0<br>(0.93–1.08)  |
| Vihiga           | 1987        | 1.0<br>(0.93–1.08)  |
| Vihiga           | 1988        | 1.01<br>(0.94–1.08) |
| Vihiga           | 1989        | 1.01<br>(0.94–1.09) |
| Vihiga           | 1990        | 1.03<br>(0.97–1.09) |
| Vihiga           | 1991        | 1.05<br>(0.99–1.1)  |
| Vihiga           | 1992        | 1.06<br>(0.99–1.14) |
| Vihiga           | 1993        | 1.08<br>(0.99–1.17) |
| Vihiga           | 1994        | 1.1<br>(1.0–1.21)   |
| Vihiga           | 1995        | 1.12<br>(1.01–1.25) |
| Vihiga           | 1996        | 1.12<br>(1.01–1.24) |
| Vihiga           | 1997        | 1.12<br>(1.01–1.23) |
| Vihiga           | 1998        | 1.12<br>(1.01–1.23) |
| Vihiga           | 1999        | 1.11<br>(1.01–1.23) |

**Table 15 Ratio of adjusted to unadjusted 5q0 values for scaled locations by year**

| <b>Geography</b> | <b>Year</b> | <b>Ratio</b>        |
|------------------|-------------|---------------------|
| Vihiga           | 2000        | 1.11<br>(1.0–1.23)  |
| Vihiga           | 2001        | 1.11<br>(0.98–1.24) |
| Vihiga           | 2002        | 1.1<br>(0.97–1.24)  |
| Vihiga           | 2003        | 1.1<br>(0.97–1.25)  |
| Vihiga           | 2004        | 1.1<br>(0.98–1.23)  |
| Vihiga           | 2005        | 1.1<br>(0.99–1.23)  |
| Vihiga           | 2006        | 1.11<br>(1.0–1.23)  |
| Vihiga           | 2007        | 1.13<br>(1.03–1.23) |
| Vihiga           | 2008        | 1.14<br>(1.03–1.25) |
| Vihiga           | 2009        | 1.14<br>(1.01–1.27) |
| Vihiga           | 2010        | 1.13<br>(1.0–1.27)  |
| Vihiga           | 2011        | 1.13<br>(0.99–1.27) |
| Vihiga           | 2012        | 1.13<br>(1.0–1.26)  |
| Vihiga           | 2013        | 1.13<br>(1.01–1.25) |
| Vihiga           | 2014        | 1.13<br>(1.03–1.24) |
| Vihiga           | 2015        | 1.12<br>(1.04–1.2)  |
| Vihiga           | 2016        | 1.12<br>(1.07–1.17) |
| Vihiga           | 2017        | 1.12<br>(1.09–1.14) |
| Wajir            | 1950        | 0.53<br>(0.53–0.53) |
| Wajir            | 1951        | 0.53<br>(0.51–0.56) |
| Wajir            | 1952        | 0.53<br>(0.49–0.58) |
| Wajir            | 1953        | 0.53<br>(0.48–0.58) |
| Wajir            | 1954        | 0.52<br>(0.47–0.57) |
| Wajir            | 1955        | 0.52<br>(0.47–0.58) |
| Wajir            | 1956        | 0.52<br>(0.48–0.58) |
| Wajir            | 1957        | 0.53<br>(0.47–0.59) |
| Wajir            | 1958        | 0.53<br>(0.46–0.59) |
| Wajir            | 1959        | 0.53<br>(0.46–0.6)  |
| Wajir            | 1960        | 0.54<br>(0.46–0.62) |
| Wajir            | 1961        | 0.54<br>(0.46–0.63) |
| Wajir            | 1962        | 0.55<br>(0.47–0.64) |

**Table 15 Ratio of adjusted to unadjusted 5q0 values for scaled locations by year**

| <b>Geography</b> | <b>Year</b> | <b>Ratio</b>        |
|------------------|-------------|---------------------|
| Wajir            | 1963        | 0.56<br>(0.48–0.65) |
| Wajir            | 1964        | 0.58<br>(0.5–0.66)  |
| Wajir            | 1965        | 0.59<br>(0.52–0.67) |
| Wajir            | 1966        | 0.61<br>(0.54–0.68) |
| Wajir            | 1967        | 0.63<br>(0.55–0.71) |
| Wajir            | 1968        | 0.64<br>(0.56–0.73) |
| Wajir            | 1969        | 0.66<br>(0.57–0.75) |
| Wajir            | 1970        | 0.68<br>(0.58–0.78) |
| Wajir            | 1971        | 0.69<br>(0.6–0.8)   |
| Wajir            | 1972        | 0.71<br>(0.62–0.81) |
| Wajir            | 1973        | 0.72<br>(0.64–0.82) |
| Wajir            | 1974        | 0.74<br>(0.66–0.81) |
| Wajir            | 1975        | 0.74<br>(0.67–0.82) |
| Wajir            | 1976        | 0.75<br>(0.66–0.84) |
| Wajir            | 1977        | 0.76<br>(0.66–0.86) |
| Wajir            | 1978        | 0.77<br>(0.66–0.89) |
| Wajir            | 1979        | 0.78<br>(0.67–0.89) |
| Wajir            | 1980        | 0.78<br>(0.68–0.89) |
| Wajir            | 1981        | 0.78<br>(0.69–0.88) |
| Wajir            | 1982        | 0.78<br>(0.71–0.88) |
| Wajir            | 1983        | 0.79<br>(0.71–0.87) |
| Wajir            | 1984        | 0.79<br>(0.72–0.88) |
| Wajir            | 1985        | 0.79<br>(0.71–0.88) |
| Wajir            | 1986        | 0.79<br>(0.7–0.89)  |
| Wajir            | 1987        | 0.79<br>(0.7–0.89)  |
| Wajir            | 1988        | 0.79<br>(0.71–0.89) |
| Wajir            | 1989        | 0.8<br>(0.71–0.89)  |
| Wajir            | 1990        | 0.8<br>(0.71–0.9)   |
| Wajir            | 1991        | 0.81<br>(0.73–0.89) |
| Wajir            | 1992        | 0.82<br>(0.74–0.9)  |
| Wajir            | 1993        | 0.83<br>(0.74–0.92) |

**Table 15 Ratio of adjusted to unadjusted 5q0 values for scaled locations by year**

| <b>Geography</b> | <b>Year</b> | <b>Ratio</b>        |
|------------------|-------------|---------------------|
| Wajir            | 1994        | 0.84<br>(0.74–0.93) |
| Wajir            | 1995        | 0.84<br>(0.74–0.96) |
| Wajir            | 1996        | 0.85<br>(0.74–0.97) |
| Wajir            | 1997        | 0.85<br>(0.75–0.97) |
| Wajir            | 1998        | 0.85<br>(0.75–0.97) |
| Wajir            | 1999        | 0.85<br>(0.76–0.95) |
| Wajir            | 2000        | 0.84<br>(0.76–0.94) |
| Wajir            | 2001        | 0.84<br>(0.76–0.95) |
| Wajir            | 2002        | 0.83<br>(0.74–0.94) |
| Wajir            | 2003        | 0.82<br>(0.73–0.92) |
| Wajir            | 2004        | 0.81<br>(0.71–0.91) |
| Wajir            | 2005        | 0.8<br>(0.7–0.89)   |
| Wajir            | 2006        | 0.79<br>(0.7–0.88)  |
| Wajir            | 2007        | 0.78<br>(0.7–0.87)  |
| Wajir            | 2008        | 0.77<br>(0.68–0.87) |
| Wajir            | 2009        | 0.77<br>(0.67–0.88) |
| Wajir            | 2010        | 0.76<br>(0.66–0.87) |
| Wajir            | 2011        | 0.75<br>(0.64–0.87) |
| Wajir            | 2012        | 0.75<br>(0.64–0.86) |
| Wajir            | 2013        | 0.74<br>(0.63–0.85) |
| Wajir            | 2014        | 0.73<br>(0.65–0.83) |
| Wajir            | 2015        | 0.73<br>(0.66–0.81) |
| Wajir            | 2016        | 0.72<br>(0.68–0.77) |
| Wajir            | 2017        | 0.72<br>(0.71–0.72) |
| WestPokot        | 1950        | 0.3<br>(0.29–0.31)  |
| WestPokot        | 1951        | 0.3<br>(0.29–0.32)  |
| WestPokot        | 1952        | 0.31<br>(0.29–0.33) |
| WestPokot        | 1953        | 0.31<br>(0.29–0.34) |
| WestPokot        | 1954        | 0.31<br>(0.29–0.35) |
| WestPokot        | 1955        | 0.32<br>(0.29–0.36) |
| WestPokot        | 1956        | 0.33<br>(0.29–0.37) |

**Table 15 Ratio of adjusted to unadjusted 5q0 values for scaled locations by year**

| <b>Geography</b> | <b>Year</b> | <b>Ratio</b>        |
|------------------|-------------|---------------------|
| WestPokot        | 1957        | 0.33<br>(0.29–0.37) |
| WestPokot        | 1958        | 0.33<br>(0.29–0.38) |
| WestPokot        | 1959        | 0.34<br>(0.3–0.38)  |
| WestPokot        | 1960        | 0.34<br>(0.31–0.39) |
| WestPokot        | 1961        | 0.35<br>(0.31–0.39) |
| WestPokot        | 1962        | 0.36<br>(0.32–0.39) |
| WestPokot        | 1963        | 0.37<br>(0.33–0.4)  |
| WestPokot        | 1964        | 0.38<br>(0.34–0.41) |
| WestPokot        | 1965        | 0.39<br>(0.35–0.44) |
| WestPokot        | 1966        | 0.41<br>(0.36–0.46) |
| WestPokot        | 1967        | 0.43<br>(0.38–0.48) |
| WestPokot        | 1968        | 0.45<br>(0.4–0.51)  |
| WestPokot        | 1969        | 0.48<br>(0.42–0.53) |
| WestPokot        | 1970        | 0.5<br>(0.45–0.56)  |
| WestPokot        | 1971        | 0.53<br>(0.48–0.58) |
| WestPokot        | 1972        | 0.55<br>(0.51–0.6)  |
| WestPokot        | 1973        | 0.58<br>(0.53–0.63) |
| WestPokot        | 1974        | 0.6<br>(0.55–0.66)  |
| WestPokot        | 1975        | 0.63<br>(0.57–0.69) |
| WestPokot        | 1976        | 0.65<br>(0.58–0.72) |
| WestPokot        | 1977        | 0.67<br>(0.59–0.75) |
| WestPokot        | 1978        | 0.7<br>(0.61–0.79)  |
| WestPokot        | 1979        | 0.72<br>(0.62–0.82) |
| WestPokot        | 1980        | 0.73<br>(0.63–0.84) |
| WestPokot        | 1981        | 0.75<br>(0.65–0.86) |
| WestPokot        | 1982        | 0.76<br>(0.67–0.87) |
| WestPokot        | 1983        | 0.78<br>(0.69–0.88) |
| WestPokot        | 1984        | 0.79<br>(0.7–0.88)  |
| WestPokot        | 1985        | 0.8<br>(0.72–0.89)  |
| WestPokot        | 1986        | 0.81<br>(0.74–0.88) |
| WestPokot        | 1987        | 0.82<br>(0.74–0.9)  |



**Table 15 Ratio of adjusted to unadjusted 5q0 values for scaled locations by year**

| <b>Geography</b> | <b>Year</b> | <b>Ratio</b>        |
|------------------|-------------|---------------------|
| WestPokot        | 1988        | 0.83<br>(0.75–0.92) |
| WestPokot        | 1989        | 0.85<br>(0.75–0.94) |
| WestPokot        | 1990        | 0.86<br>(0.76–0.97) |
| WestPokot        | 1991        | 0.88<br>(0.77–0.99) |
| WestPokot        | 1992        | 0.9<br>(0.79–1.01)  |
| WestPokot        | 1993        | 0.92<br>(0.82–1.02) |
| WestPokot        | 1994        | 0.94<br>(0.85–1.03) |
| WestPokot        | 1995        | 0.96<br>(0.87–1.05) |
| WestPokot        | 1996        | 0.97<br>(0.88–1.06) |
| WestPokot        | 1997        | 0.98<br>(0.89–1.09) |
| WestPokot        | 1998        | 0.99<br>(0.88–1.11) |
| WestPokot        | 1999        | 0.99<br>(0.86–1.13) |
| WestPokot        | 2000        | 0.99<br>(0.85–1.13) |
| WestPokot        | 2001        | 0.99<br>(0.86–1.14) |
| WestPokot        | 2002        | 0.99<br>(0.86–1.13) |
| WestPokot        | 2003        | 0.98<br>(0.86–1.12) |
| WestPokot        | 2004        | 0.98<br>(0.86–1.1)  |
| WestPokot        | 2005        | 0.98<br>(0.87–1.1)  |
| WestPokot        | 2006        | 0.98<br>(0.87–1.1)  |
| WestPokot        | 2007        | 0.97<br>(0.86–1.11) |
| WestPokot        | 2008        | 0.98<br>(0.85–1.13) |
| WestPokot        | 2009        | 0.99<br>(0.85–1.13) |
| WestPokot        | 2010        | 0.99<br>(0.85–1.12) |
| WestPokot        | 2011        | 0.98<br>(0.85–1.12) |
| WestPokot        | 2012        | 0.98<br>(0.85–1.13) |
| WestPokot        | 2013        | 0.99<br>(0.86–1.13) |
| WestPokot        | 2014        | 1.0<br>(0.89–1.11)  |
| WestPokot        | 2015        | 1.0<br>(0.91–1.09)  |
| WestPokot        | 2016        | 1.01<br>(0.95–1.07) |
| WestPokot        | 2017        | 1.0<br>(0.99–1.02)  |
